# Supplementary material
Source: PubMed Central journal article supplement (PMC3358758)
Supplement: ASN.2011070738_ASN2011070738SupplementaryData.pdf [file ASN.2011070738_ASN2011070738SupplementaryData.pdf]

Supplemental materials for

**“Quantitative Proteomics Identifies Vasopressin-Responsive Nuclear Proteins in the Collecting Duct”**

**Schenk et al.**

**Page 2. Supplemental Fig. 1.**

**Page 3. Supplemental Methods**

**Page 7. Supplemental Table 1**

**Page 87. Supplemental Table 2**

**Page 212. Supplemental Table 3**

**Page 219. Supplemental Table 4**

**Page 221. Supplemental Table 5**

**Page 222. Supplemental Table 6**

**Page 315. Supplemental Table 7**

**Page 317. Supplemental Table 8**

# Supplemental Fig. 1. Design of SILAC experiments.

Incorporation of labeled amino acids  
(9 days, >6 doubling times)

Light medium  
[<sup>12</sup>C] Lysine  
[<sup>12</sup>C, <sup>14</sup>N] Arginine

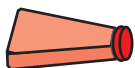

Heavy medium  
[<sup>13</sup>C] Lysine  
[<sup>13</sup>C, <sup>15</sup>N] Arginine

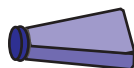

Growth to confluency on membrane support  
(5 days, in presence of 0.1 nM dDAVP)

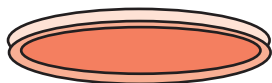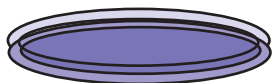

Withdrawal of dDAVP  
(24 h)

Stimulation with dDAVP or vehicle  
(60 min)

Pooling of cells  
1:1 from each populations

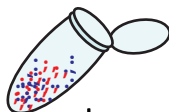

Nucleo- cytoplasmic separation (NE-PER®)

Cytoplasmic extract

Nuclear extract

Nuclear pellet

In-gel trypsin digestion, fractionation

LC-MS/MS (Orbitrap)

Protein identification and quantitation

## Full Methods

Cell culture and sample preparation. All studies were done in an AQP2-expressing mpkCCD clonal cell line (clone 11)<sup>1</sup> grown on membrane supports (Transwell, Corning). We carried out three series of mass spectrometry experiments, viz. a non-quantitative profiling study and two series of experiments using the SILAC method for quantification. In each study, stepwise separation of cytoplasmic and nuclear extract was performed using a commercially-available kit (NE-PER® Nuclear and Cytoplasmic Extraction Reagent Kit, Pierce, Rockford, IL). In the non-quantitative profiling experiments, the test protocol supplied by the manufacturer was followed to obtain cytoplasmic extract, nuclear extract and nuclear pellet. To enhance the purity of the separation of cytoplasm and nucleus for the quantitative studies, the steps extracting the cytoplasm were carried out twice before proceeding with the nuclear sample.

The two series of studies quantifying the response to the vasopressin analog dDAVP (0.1 nM) were done using SILAC<sup>14</sup> culture media containing the amino acids arginine and lysine labeled with stable isotopes (“heavy”: <sup>13</sup>C<sub>6</sub> <sup>15</sup>N<sub>4</sub> arginine, <sup>13</sup>C<sub>6</sub> lysine; “light”: <sup>12</sup>C<sub>6</sub> <sup>14</sup>N<sub>4</sub> arginine, <sup>12</sup>C<sub>6</sub> lysine [Invitrogen]) for 16 days (three passages). This labeling period is sufficient to achieve >98% saturation of labeling.<sup>2</sup> At the beginning of an experiment (Suppl. Fig. 1), labeled cells were grown in the presence of dDAVP (0.1 nM) for 4-5 days to assure that all vasopressin-dependent proteins are expressed.<sup>3</sup> In the first quantitative series, the dDAVP was then withdrawn for 24 hour prior to re-exposure to vasopressin or vehicle for 60 minutes. In the second series, observations were made after 30-min exposure to dDAVP after a 6-hour washout period. For these experiments, cells (60-90 µg protein) were pooled in a 1:1 ratio (dDAVP:vehicle) and subjected to nuclear and cytoplasmic separation as described above prior to mass spectrometry.

Mass spectrometry. Samples were reduced with DTT (10 mM), alkylated with iodoacetamide (40 mM), and solubilized with ¼ part of Laemmli buffer (5×: 7.5% SDS, 30% glycerol, 50 mM Tris, pH 6.8) prior to 1D-SDS-PAGE (4-15% gradient). One-dimensional SDS-PAGE was performed using 4%–15% gradient polyacrylamide gels. Protein in the gel was visualized with colloidal Coomassie blue staining (GelCode Blue Stain Reagent, G-250; Pierce Biotechnology, Rockford, IL) for 5 min followed by destaining in deionized H<sub>2</sub>O for 1 hour. Protein in the gel was then sliced into small blocks for a total of 20 or 40 blocks per lane. Each block was minced into small pieces (1–1.5 mm<sup>3</sup>). Gel pieces from each block were further destained and dehydrated by incubating with 25 mM NH<sub>4</sub>HCO<sub>3</sub>/50% acetonitrile (ACN) solution for 10 min three times and then were dried in vacuo. The dried gel pieces were immersed in 25 mM NH<sub>4</sub>HCO<sub>3</sub> solution containing 12.5 ng/µl trypsin (V5113) (Promega Corp., Madison, WI) and incubated at 37°C overnight. The tryptic peptides were extracted by incubating the gel pieces with 50% ACN/0.1% formic acid (FA) followed by sonication in a water bath for 20 min. This step was repeated twice. The volume of the extracted peptide samples was reduced to about 5 µl in vacuo and then the samples were reconstituted to 20 µl in 0.1% FA. The resulting peptide mixtures were concentrated and desalted with C18 Zip-tips (Millipore Corp., Bedford, MA). They were dried in vacuo and reconstituted to 10 µl in 0.1% FA for LC-MS/MS analysis.

Tryptic peptides were analyzed on an Eksigent nanoLC system connected to an LTQ Orbitrap Velos mass spectrometer (Thermo Fisher Scientific) equipped with a nano-electrospray ion source. Peptides were loaded onto a peptide trap cartridge (Agilent Technologies) at a flow rate of 6 µl/min. The trapped peptides were then fractionated with a reversed-phase PicoFrit column (New Objective, Woburn, MA) using a linear gradient of 5%–35% ACN in 0.1% FA. The gradient time was 45 min at a flow rate of 0.25 µl/min. Precursor mass spectra (MS1) were acquired in the orbitrap at 60,000 resolution and product mass spectra (MS2) were acquired with the ion trap.

MS spectra were searched using the SEQUEST, Inspect, and OMSSA algorithms as described<sup>4</sup> using the most recent mouse RefSeq Database. Data were filtered using the target-decoy approach<sup>5</sup> to obtain <1% FDR at a peptide level. Quantification of light and heavy peptides was performed by QUIL software.<sup>6</sup> Uniqueness or multiplicity of putative peptide assignment was evaluated using ProMatch software<sup>4</sup>. Protein quantifications were median-normalized in each of experimental pair. Dual statistical criteria were applied: p, t-test (paired, P<0.05) and outside the 95% confidence interval defined by vehicle vs. vehicle experiments.

In an additional set of SILAC experiments, we analyzed samples treated for 30 min with dDAVP (0.1 nM) rather than 60 min (see above). Protein samples were reduced with 10 nM DTT for 1 hour and alkylated with iodoacetamide (40 nM) for 1 hour in the dark. Samples were diluted in 25 mM NH<sub>4</sub>HCO<sub>3</sub> before addition of trypsin (1:20 wt/wt for 16 hour at 37°C). After acidifying and desalting (HLD cartridges; Oasis), samples were dried in vacuo and fractionated using strong cation exchange (SCX) chromatography. Samples were resuspended in solvent A (5 mM KH<sub>2</sub>PO<sub>4</sub>, 25% ACN, pH 3.0) and injected onto a Polysulfoethyl A SCX column (4.6 mm ID x 20 cm length, 5 um particle size and 300 A pore size; PolyLC) on an Agilent HP1100 system. A total of 24 fractionated samples for the NE and 24 fractionated samples for NP were obtained. The fractionated samples were dried in vacuo and resuspended in 0.1% formic acid. Flow-through samples from Fe-NTA phosphopeptide IMAC columns (Pierce) were analyzed by LC-MS/MS after desalting using Graphite Spin columns (Pierce).

Bioinformatics. Clustering of transcription factors was done using the *Muscle* algorithm<sup>7</sup> and results were displayed as a dendrogram using iTOL (Interactive Tree Of Life).<sup>8</sup> Conserved transcription factor binding sites (TFBS) in the 5'-flanking regions of specific genes were found using the online Genomatix software suite and TFBS database (<http://www.genomatix.de/>).

Immunoblotting and antibodies. Immunoblot analysis using nitrocellulose membranes and IR dye-coupled secondary antibodies was performed as described previously<sup>9</sup>. Blocking

was performed using commercially-available blocking buffer (Licor). Fluorescence signals were read out using the Odyssey system.

#### Reference List

1. Yu MJ, Miller RL, Uawithya P, Rinschen MM, Khositseth S, Braucht DW, Chou CL, Pisitkun T, Nelson RD, Knepper MA: Systems-level analysis of cell-specific AQP2 gene expression in renal collecting duct. *Proc Natl Acad Sci U S A* 106:2441-2446, 2009
2. Rinschen MM, Yu MJ, Wang G, Boja ES, Hoffert JD, Pisitkun T, Knepper MA: Quantitative phosphoproteomic analysis reveals vasopressin V2-receptor-dependent signaling pathways in renal collecting duct cells. *Proc Natl Acad Sci U S A* 2010
3. Khositseth S, Pisitkun T, Slentz DH, Wang G, Hoffert JD, Knepper MA, Yu MJ: Quantitative protein and mRNA profiling shows selective post-transcriptional control of protein expression by vasopressin in kidney cells. *Mol Cell Proteomics* 2010
4. Tchapyjnikov D, Li Y, Pisitkun T, Hoffert JD, Yu MJ, Knepper MA: Proteomic profiling of nuclei from native renal inner medullary collecting duct cells using LC-MS/MS. *Physiol Genomics* 40:167-183, 2010
5. Elias JE, Gygi SP: Target-decoy search strategy for increased confidence in large-scale protein identifications by mass spectrometry  
2. *Nat Methods* 4:207-214, 2007
6. Wang G, Wu WW, Pisitkun T, Hoffert JD, Knepper MA, Shen RF: Automated quantification tool for high-throughput proteomics using stable isotope labeling and LC-MSn. *Anal Chem* 78:5752-5761, 2006
7. Edgar RC: MUSCLE: a multiple sequence alignment method with reduced time and space complexity. *BMC Bioinformatics* 5:113, 2004
8. Letunic I, Bork P: Interactive Tree Of Life v2: online annotation and display of phylogenetic trees made easy. *Nucleic Acids Res* 39:W475-W478, 2011
9. Pisitkun T, Jacob V, Schleicher SM, Chou CL, Yu MJ, Knepper MA: Akt and ERK1/2 pathways are components of the vasopressin signaling network in rat native IMCD. *Am J Physiol Renal Physiol* 295:F1030-F1043, 2008

## Suppl. Tab. 1

List of identified proteins; excludes proteins without mRNA match; peptide count for the three compartments is given in columns D-F

| GI Accession No. | Gene Symbol   | Protein Name                                                                       | Cytoplasmic extract | Nuclear extract | Nuclear pellet |
|------------------|---------------|------------------------------------------------------------------------------------|---------------------|-----------------|----------------|
| 27228985         | Ndufa12       | 13kDa differentiation-associated protein                                           | 5                   | 1               | 3              |
| 23956162         | Agpat2        | 1-acylglycerol-3-phosphate O-acyltransferase 2                                     | 3                   | 0               | 0              |
| 27229077         | Agpat5        | 1-acylglycerol-3-phosphate O-acyltransferase 5                                     | 0                   | 0               | 1              |
| 40538842         | E430028B21Rik | 2'-phosphodiesterase                                                               | 1                   | 0               | 0              |
| 6753622          | Decr2         | 2,4-dienoyl CoA reductase 2                                                        | 1                   | 6               | 0              |
| 147901538        | Ogfod1        | 2-oxoglutarate and iron-dependent oxygenase domain containing 1 isoform 1          | 1                   | 0               | 0              |
| 39652626         | Bpnt1         | 3'-phosphoadenosine 5'-phosphosulfate synthase 1                                   | 4                   | 0               | 0              |
| 6754982          | Papss1        | 3-hydroxy-3-methylglutaryl CoA lyase                                               | 5                   | 0               | 0              |
| 171543858        | Hmgcl         | 3-hydroxyisobutyrate dehydrogenase precursor                                       | 2                   | 0               | 1              |
| 21704140         | Hibadh        | 3-hydroxyisobutyryl-Coenzyme A hydrolase                                           | 10                  | 0               | 0              |
| 22122625         | Hibch         | 3-hydroxyisobutyryl-Coenzyme A hydrolase                                           | 10                  | 0               | 0              |
| 31543976         | Ywhag         | 3-monooxygenase/tryptophan 5-monooxygenase activation protein, gamma polypeptide   | 12                  | 7               | 8              |
| 18266680         | Oxct1         | 3-oxoacid CoA transferase 1                                                        | 13                  | 0               | 2              |
| 6679066          | Nipsnap1      | 4-nitrophenylphosphatase domain and non-neuronal SNAP25-like protein homolog 1     | 1                   | 0               | 0              |
| 7657031          | Nt5c          | 5'-nucleotidase, cytosolic                                                         | 1                   | 0               | 0              |
| 117606214        | Xrn2          | 5'-exoribonuclease 2                                                               | 1                   | 17              | 0              |
| 45544618         | Mtap          | 5'-methylthioadenosine phosphorylase                                               | 3                   | 0               | 0              |
| 256665238        | Nt5c2         | 5'-nucleotidase, cytosolic II                                                      | 3                   | 0               | 0              |
| 156627553        | Nt5c3l        | 5'-nucleotidase, cytosolic III-like isoform 1                                      | 1                   | 0               | 0              |
| 227908823        | Atic          | 5-aminoimidazole-4-carboxamide ribonucleotide formyltransferase/IMP cyclohydrolase | 22                  | 0               | 0              |
| 21312554         | 2010107E04Rik | 6.8 kDa mitochondrial proteolipid                                                  | 1                   | 0               | 0              |
| 13384778         | Pgls          | 6-phosphogluconolactonase                                                          | 8                   | 0               | 3              |
| 6680642          | Adam8         | a disintegrin and metalloproteinase domain 8                                       | 2                   | 1               | 0              |
| 110347485        | Adam17        | a disintegrin and metalloproteinase domain 17                                      | 1                   | 0               | 0              |
| 160358787        | Adam9         | a disintegrin and metalloproteinase domain 9 precursor                             | 1                   | 0               | 0              |
| 13626040         | Akap12        | A kinase (PRKA) anchor protein (gravin) 12                                         | 65                  | 1               | 1              |
| 125661048        | Akap9         | A kinase (PRKA) anchor protein (yotiao) 9                                          | 5                   | 0               | 2              |
| 40807354         | Akap10        | A kinase (PRKA) anchor protein 10                                                  | 1                   | 0               | 0              |
| 189181672        | Akap13        | A kinase (PRKA) anchor protein 13                                                  | 0                   | 0               | 1              |
| 31560394         | Akap8         | A kinase anchor protein 8                                                          | 5                   | 8               | 7              |
| 239985513        | Atad3a        | AAA-ATPase TOB3                                                                    | 4                   | 1               | 7              |
| 269784760        | Abhd10        | abhydrolase domain containing 10                                                   | 3                   | 0               | 0              |
| 299473805        | Abhd11        | abhydrolase domain containing 11                                                   | 2                   | 0               | 0              |
| 159110817        | Abhd12        | abhydrolase domain containing 12                                                   | 0                   | 1               | 0              |
| 171460960        | Abhd14b       | abhydrolase domain containing 14b                                                  | 7                   | 0               | 0              |
| 31560264         | Abhd6         | abhydrolase domain containing 6                                                    | 0                   | 0               | 1              |
| 163965368        | Aim1          | absent in melanoma 1                                                               | 1                   | 0               | 0              |
| 73622271         | Ash1l         | absent, small, or homeotic 1-like                                                  | 0                   | 2               | 0              |
| 124487344        | Esf1          | ABT1-associated protein                                                            | 1                   | 0               | 1              |
| 21313520         | Aacs          | acetoacetyl-CoA synthetase                                                         | 1                   | 0               | 1              |
| 21450129         | Acat1         | acetyl-Coenzyme A acetyltransferase 1 precursor                                    | 16                  | 14              | 0              |
| 148747461        | Acat2         | acetyl-Coenzyme A acetyltransferase 2                                              | 2                   | 0               | 0              |
| 110625948        | Acat3         | acetyl-Coenzyme A acetyltransferase 3                                              | 3                   | 0               | 0              |

|           |         |                                                                                   |    |    |    |
|-----------|---------|-----------------------------------------------------------------------------------|----|----|----|
| 18700004  | Acaa1a  | acetyl-Coenzyme A acyltransferase 1                                               | 16 | 1  | 1  |
| 22122797  | Acaa1b  | acetyl-Coenzyme A acyltransferase 1B                                              | 1  | 0  | 0  |
| 29126205  | Acaa2   | acetyl-Coenzyme A acyltransferase 2 (mitochondrial 3-oxoacyl-Coenzyme A thiolase) | 21 | 18 | 4  |
| 241982696 | Aaas    | achalasia, adrenocortical insufficiency, alacrimia                                | 0  | 0  | 3  |
| 226693369 | Gaa     | acid alpha-glucosidase                                                            | 7  | 0  | 0  |
| 31542070  | Acp1    | acid phosphatase 1, soluble isoform 1                                             | 4  | 0  | 0  |
| 29150253  | Acp2    | acid phosphatase 2, lysosomal                                                     | 1  | 1  | 0  |
| 66773165  | Acp6    | acid phosphatase 6, lysophosphatidic                                              | 4  | 0  | 0  |
| 40254600  | Anp32a  | acidic (leucine-rich) nuclear phosphoprotein 32 family, member A                  | 8  | 0  | 2  |
| 18700032  | Anp32b  | acidic (leucine-rich) nuclear phosphoprotein 32 family, member B                  | 7  | 1  | 1  |
| 254587996 | Anp32e  | acidic (leucine-rich) nuclear phosphoprotein 32 family, member E                  | 5  | 0  | 2  |
| 24418931  | Dnttip2 | acidic 82 kDa protein                                                             | 1  | 0  | 9  |
| 110347487 | Aco1    | aconitase 1                                                                       | 2  | 0  | 0  |
| 18079339  | Aco2    | aconitase 2, mitochondrial                                                        | 32 | 0  | 15 |
| 31982370  | Afap111 | actin filament associated protein 1-like 1                                        | 1  | 0  | 0  |
| 295317359 | Afap112 | actin filament associated protein 1-like 2                                        | 0  | 0  | 1  |
| 9790221   | Arpc1a  | actin related protein 2/3 complex, subunit 1A                                     | 0  | 1  | 0  |
| 160837788 | Arpc1b  | actin related protein 2/3 complex, subunit 1B                                     | 1  | 12 | 8  |
| 112363072 | Arpc2   | actin related protein 2/3 complex, subunit 2                                      | 10 | 19 | 12 |
| 9790141   | Arpc3   | actin related protein 2/3 complex, subunit 3                                      | 4  | 8  | 7  |
| 281427244 | Arpc4   | actin related protein 2/3 complex, subunit 4                                      | 3  | 8  | 4  |
| 224809382 | Arpc5   | actin related protein 2/3 complex, subunit 5                                      | 1  | 3  | 3  |
| 21312654  | Arpc5l  | actin related protein 2/3 complex, subunit 5-like                                 | 1  | 8  | 3  |
| 6752954   | Actg1   | actin, gamma, cytoplasmic 1                                                       | 19 | 21 | 24 |
| 157057174 | Ablim1  | actin-binding LIM protein 1 isoform 3                                             | 0  | 0  | 12 |
| 11230802  | Actn4   | actinin alpha 4                                                                   | 34 | 47 | 30 |
| 61097906  | Actn1   | actinin, alpha 1                                                                  | 27 | 37 | 24 |
| 189181668 | Actl6a  | actin-like 6A                                                                     | 1  | 13 | 5  |
| 22122825  | Actr2   | actin-related protein 2                                                           | 8  | 14 | 11 |
| 31791059  | Alcam   | activated leukocyte cell adhesion molecule                                        | 8  | 0  | 0  |
| 20270208  | Ascc2   | activating signal cointegrator 1 complex subunit 2                                | 0  | 1  | 0  |
| 225703072 | Ascc3   | activating signal cointegrator 1 complex subunit 3 isoform 2                      | 1  | 0  | 0  |
| 86604724  | Atf1    | activating transcription factor 1                                                 | 0  | 1  | 0  |
| 68799916  | Atf2    | activating transcription factor 2 isoform 1                                       | 0  | 1  | 0  |
| 22122515  | Ahsa1   | activator of heat shock 90kDa protein ATPase homolog 1                            | 3  | 0  | 1  |
| 300192925 | Dbf4    | activator of S phase kinase                                                       | 0  | 1  | 0  |
| 160358785 | Acvr2a  | activin A receptor, type IIA precursor                                            | 1  | 0  | 1  |
| 90093349  | Adnp    | activity-dependent neuroprotective protein                                        | 0  | 1  | 4  |
| 46518528  | Acsl4   | acyl-CoA synthetase long-chain family member 4 isoform 1                          | 7  | 0  | 0  |
| 58218988  | Acsl5   | acyl-CoA synthetase long-chain family member 5                                    | 3  | 0  | 0  |
| 31980996  | Acss2   | acyl-CoA synthetase short-chain family member 2                                   | 0  | 1  | 0  |
| 13385260  | Acot13  | acyl-CoA thioesterase 13                                                          | 3  | 0  | 0  |
| 238624114 | Acot2   | acyl-CoA thioesterase 2                                                           | 4  | 0  | 0  |
| 225690614 | Acot7   | acyl-CoA thioesterase 7 isoform 2                                                 | 6  | 2  | 0  |
| 254587964 | Acot8   | acyl-CoA thioesterase 8                                                           | 2  | 4  | 0  |
| 31980998  | Acot9   | acyl-CoA thioesterase 9                                                           | 10 | 0  | 0  |
| 229608928 | Acbd3   | acyl-Coenzyme A binding domain containing 3                                       | 11 | 0  | 0  |
| 156255165 | Acbd5   | acyl-Coenzyme A binding domain containing 5 isoform b                             | 1  | 0  | 2  |



|           |          |                                                                                      |    |    |    |
|-----------|----------|--------------------------------------------------------------------------------------|----|----|----|
| 74271799  | Acad11   | acyl-Coenzyme A dehydrogenase family, member 11                                      | 0  | 2  | 0  |
| 118403322 | Acad8    | acyl-Coenzyme A dehydrogenase family, member 8                                       | 5  | 0  | 0  |
| 23956084  | Acadvl   | acyl-Coenzyme A dehydrogenase, very long chain                                       | 30 | 5  | 2  |
| 66793429  | Acox1    | acyl-Coenzyme A oxidase 1                                                            | 12 | 15 | 0  |
| 13384810  | Acyp1    | acylphosphatase 1                                                                    | 5  | 2  | 0  |
| 150378458 | Adam10   | ADAM metallopeptidase domain 10                                                      | 5  | 0  | 1  |
| 165905595 | Adamtsl5 | ADAMTS-like 5 isoform 1                                                              | 1  | 0  | 1  |
| 88853578  | Ap1b1    | adaptor protein complex AP-1, beta 1 subunit                                         | 26 | 19 | 13 |
| 56744242  | Ap1g1    | adaptor protein complex AP-1, gamma 1 subunit                                        | 15 | 4  | 3  |
| 160707961 | Ap1g2    | adaptor protein complex AP-1, gamma 2 subunit                                        | 1  | 0  | 0  |
| 160333508 | Ap1m2    | adaptor protein complex AP-1, mu 2 subunit isoform 2                                 | 8  | 1  | 2  |
| 6671559   | Ap1s1    | adaptor protein complex AP-1, sigma 1                                                | 1  | 2  | 0  |
| 163644277 | Ap2a2    | adaptor protein complex AP-2, alpha 2 subunit                                        | 8  | 22 | 14 |
| 6753074   | Ap2m1    | adaptor protein complex AP-2, mu1                                                    | 1  | 13 | 3  |
| 40254484  | Ap1s2    | adaptor-related protein complex 1 sigma 2 subunit                                    | 0  | 1  | 0  |
| 78711838  | Ap2b1    | adaptor-related protein complex 2, beta 1 subunit isoform a                          | 5  | 19 | 11 |
| 161086984 | Ap2s1    | adaptor-related protein complex 2, sigma 1 subunit                                   | 1  | 5  | 0  |
| 163310776 | Ap3b1    | adaptor-related protein complex 3, beta 1 subunit                                    | 2  | 0  | 0  |
| 6671565   | Ap3d1    | adaptor-related protein complex 3, delta 1 subunit                                   | 3  | 0  | 0  |
| 6753078   | Ap3s1    | adaptor-related protein complex 3, sigma 1 subunit                                   | 0  | 0  | 1  |
| 6671557   | Ap1m1    | adaptor-related protein complex AP-1, mu subunit 1                                   | 4  | 0  | 0  |
| 35215317  | Ap1s3    | adaptor-related protein complex AP-1, sigma 3                                        | 1  | 1  | 0  |
| 90568303  | Asxl1    | additional sex combs like 1                                                          | 0  | 0  | 1  |
| 156255173 | Add1     | adducin 1 (alpha) isoform 1                                                          | 1  | 14 | 3  |
| 255759892 | Add3     | adducin 3 (gamma)                                                                    | 0  | 8  | 0  |
| 118601013 | Aprt     | adenine phosphoribosyltransferase                                                    | 5  | 0  | 5  |
| 110225370 | Apc      | adenomatosis polyposis coli                                                          | 0  | 1  | 0  |
| 226371684 | Adar     | adenosine deaminase, RNA-specific isoform 3                                          | 0  | 1  | 0  |
| 19527306  | Adk      | adenosine kinase                                                                     | 5  | 0  | 0  |
| 66792802  | Ampd3    | adenosine monophosphate deaminase 3                                                  | 1  | 0  | 0  |
| 86604721  | Adcy6    | adenylate cyclase 6                                                                  | 1  | 0  | 0  |
| 77020262  | Ak2      | adenylate kinase 2 isoform b                                                         | 12 | 2  | 0  |
| 23956104  | Ak3      | adenylate kinase 3                                                                   | 14 | 0  | 3  |
| 29788764  | Adsl     | adenylosuccinate lyase                                                               | 7  | 0  | 0  |
| 31560737  | Adss     | adenylosuccinate synthase                                                            | 1  | 0  | 0  |
| 6671519   | Adssl1   | adenylosuccinate synthase like 1                                                     | 3  | 0  | 0  |
| 31981027  | Adrm1    | adhesion regulating molecule 1                                                       | 2  | 0  | 0  |
| 116235489 | Adfp     | adipose differentiation related protein                                              | 10 | 0  | 0  |
| 194353962 | Arf1     | ADP-ribosylation factor 1                                                            | 9  | 8  | 9  |
| 6680720   | Arf4     | ADP-ribosylation factor 4                                                            | 1  | 0  | 2  |
| 6680722   | Arf5     | ADP-ribosylation factor 5                                                            | 3  | 0  | 5  |
| 6680724   | Arf6     | ADP-ribosylation factor 6                                                            | 4  | 6  | 5  |
| 156231075 | Arfgef1  | ADP-ribosylation factor guanine nucleotide-exchange factor 1(brefeldin A-inhibited)  | 0  | 0  | 2  |
| 148229140 | Arfgef2  | ADP-ribosylation factor guanine nucleotide-exchange factor 2 (brefeldin A-inhibited) | 1  | 0  | 0  |
| 124487362 | Arfp1    | ADP-ribosylation factor interacting protein 1                                        | 6  | 0  | 1  |
| 228008331 | Arfp2    | ADP-ribosylation factor interacting protein 2                                        | 1  | 0  | 0  |
| 260763874 | Arfrp1   | ADP-ribosylation factor related protein 1                                            | 2  | 0  | 0  |
| 153792526 | Arl1     | ADP-ribosylation factor-like 1                                                       | 4  | 0  | 5  |
| 13385518  | Arl8b    | ADP-ribosylation factor-like 10C                                                     | 2  | 0  | 1  |
| 27369856  | Arl15    | ADP-ribosylation factor-like 15                                                      | 1  | 0  | 0  |
| 9789881   | Arl3     | ADP-ribosylation factor-like 3                                                       | 2  | 0  | 0  |

|           |               |                                                                         |    |     |    |
|-----------|---------------|-------------------------------------------------------------------------|----|-----|----|
| 13384792  | Arl4d         | ADP-ribosylation factor-like 4D                                         | 0  | 0   | 2  |
| 33695144  | Arl5a         | ADP-ribosylation factor-like 5                                          | 0  | 0   | 1  |
| 188528681 | Arl6          | ADP-ribosylation factor-like 6                                          | 0  | 0   | 1  |
| 45433590  | Arl6ip1       | ADP-ribosylation factor-like 6 interacting protein 1                    | 1  | 0   | 0  |
| 14149750  | Arl6ip5       | ADP-ribosylation factor-like 6 interacting protein 5                    | 2  | 0   | 0  |
| 23956194  | Arl8a         | ADP-ribosylation factor-like 8A                                         | 3  | 1   | 3  |
| 254281227 | Arl6ip6       | ADP-ribosylation-like factor 6-interacting protein 6                    | 1  | 0   | 3  |
| 66792806  | Afg3l1        | AFG3(ATPase family gene 3)-like 1                                       | 2  | 0   | 0  |
| 110625761 | Afg3l2        | AFG3(ATPase family gene 3)-like 2                                       | 1  | 0   | 0  |
| 42490751  | Agm           | agrin                                                                   | 0  | 1   | 0  |
| 90403607  | Ahnak         | AHNAK nucleoprotein isoform 1                                           | 62 | 146 | 78 |
| 31981662  | Jub           | ajuba                                                                   | 0  | 0   | 1  |
| 110347489 | Akap1         | A-kinase anchor protein 1                                               | 0  | 0   | 3  |
| 190883484 | Akt3          | AKT3 kinase                                                             | 0  | 1   | 0  |
| 34610207  | Aars          | alanyl-tRNA synthetase                                                  | 12 | 1   | 0  |
| 34328288  | Aldh3b1       | aldehyde dehydrogenase 3 family, member B1                              | 3  | 1   | 2  |
| 75677435  | Aldh3a2       | aldehyde dehydrogenase 3A2                                              | 4  | 0   | 1  |
| 115334671 | Aldh9a1       | aldehyde dehydrogenase 9A1                                              | 6  | 1   | 0  |
| 19527258  | Aldh6a1       | aldehyde dehydrogenase family 6, subfamily A1                           | 18 | 0   | 0  |
| 10946870  | Akr1a4        | aldo-keto reductase family 1, member A4 (aldehyde reductase)            | 1  | 0   | 0  |
| 160707894 | Akr1b3        | aldo-keto reductase family 1, member B1                                 | 13 | 0   | 3  |
| 85719330  | Akr1c12       | aldo-keto reductase family 1, member C12                                | 3  | 0   | 0  |
| 282398141 | Akr1c19       | aldo-keto reductase family 1, member C19                                | 7  | 0   | 1  |
| 240120054 | Akr7a5        | aldo-keto reductase family 7, member A5 (aflatoxin aldehyde reductase)  | 2  | 0   | 0  |
| 60687506  | Aldoc         | aldolase C, fructose-bisphosphate                                       | 3  | 0   | 0  |
| 31044423  | Alkbh5        | alkB, alkylation repair homolog 5                                       | 0  | 4   | 0  |
| 61675696  | Alkbh8        | alkB, alkylation repair homolog 8                                       | 0  | 1   | 0  |
| 295444834 | Agps          | alkyldihydroxyacetone phosphate synthase                                | 6  | 6   | 3  |
| 21553105  | Aif1l         | allograft inflammatory factor 1-like                                    | 2  | 3   | 1  |
| 219689066 | 1500010J02Rik | alpha accessory factor 132 isoform a                                    | 0  | 1   | 0  |
| 38194222  | Mare          | alpha globin regulatory element containing                              | 1  | 0   | 1  |
| 8394027   | Ppp2r1a       | alpha isoform of regulatory subunit A, protein phosphatase 2            | 17 | 16  | 5  |
| 254540097 | 3222402P14Rik | alpha isoform of regulatory subunit B, protein phosphatase 2            | 0  | 1   | 0  |
| 154091016 | Atrx          | alpha thalassemia/mental retardation syndrome X-linked homolog          | 1  | 1   | 4  |
| 172072657 | Alg2          | alpha-1,3-mannosyltransferase ALG2                                      | 2  | 0   | 0  |
| 255003748 | Alg3          | alpha-1,3-mannosyltransferase ALG3                                      | 0  | 0   | 1  |
| 242118003 | Wdr81         | alpha-2-plasmin inhibitor                                               | 1  | 1   | 0  |
| 254910995 | Naglu         | alpha-N-acetylglucosaminidase                                           | 6  | 2   | 1  |
| 237757295 | Als2          | alsin isoform 1                                                         | 1  | 0   | 0  |
| 224994233 | Kdm1          | amine oxidase (flavin containing) domain 2                              | 1  | 18  | 4  |
| 288541337 | Aimp2         | aminoacyl tRNA synthetase complex-interacting multifunctional protein 2 | 3  | 0   | 0  |
| 110625916 | 2010111I01Rik | aminopeptidase O                                                        | 0  | 1   | 0  |
| 68226731  | Npepps        | aminopeptidase puromycin sensitive                                      | 9  | 0   | 0  |
| 47523981  | Npepl1        | aminopeptidase-like 1                                                   | 2  | 0   | 0  |
| 334848200 | Ammecr1l      | AMME chromosomal region gene 1-like                                     | 1  | 0   | 0  |
| 23956234  | Prkab1        | AMP-activated protein kinase beta 1 non-catalytic subunit               | 0  | 0   | 1  |
| 282847331 | Prkag2        | AMP-activated protein kinase gamma2 subunit                             | 1  | 0   | 0  |

|           |          |                                                                  |    |    |    |
|-----------|----------|------------------------------------------------------------------|----|----|----|
| 124107596 | Prkag1   | AMP-activated protein kinase, noncatalytic gamma-1 subunit       | 4  | 0  | 4  |
| 124486747 | Agl      | amylo-1,6-glucosidase, 4-alpha-glucanotransferase                | 1  | 0  | 0  |
| 311893408 | App      | amyloid beta (A4) precursor protein                              | 6  | 2  | 0  |
| 319738665 | Apbb2    | amyloid beta (A4) precursor protein-binding, family B, member 2  | 0  | 1  | 0  |
| 156255194 | Aplp2    | amyloid beta (A4) precursor-like protein 2 isoform c             | 3  | 2  | 1  |
| 228008323 | Anapc1   | anaphase promoting complex subunit 1                             | 1  | 2  | 0  |
| 35900980  | Anapc10  | anaphase promoting complex subunit 10                            | 0  | 2  | 0  |
| 254281282 | Anapc7   | anaphase promoting complex subunit 7                             | 0  | 3  | 0  |
| 34328275  | Aggf1    | angiogenic factor with G patch and FHA domains 1                 | 0  | 0  | 1  |
| 119120838 | Amotl2   | angiomin like 2                                                  | 0  | 1  | 0  |
| 124487107 | Amotl1   | angiomin-like 1                                                  | 1  | 0  | 0  |
| 251823794 | Anln     | anillin                                                          | 0  | 1  | 0  |
| 261862329 | Rai14    | ankycorbin                                                       | 0  | 1  | 6  |
| 116256505 | Ank3     | ankyrin 3, epithelial isoform c                                  | 0  | 3  | 0  |
| 85702366  | Ankyf1   | ankyrin repeat and FYVE domain containing 1                      | 1  | 0  | 0  |
| 114205426 | Asb3     | ankyrin repeat and SOCS box-containing protein 3                 | 1  | 0  | 0  |
| 17505202  | Asb4     | ankyrin repeat and SOCS box-containing protein 4                 | 1  | 0  | 0  |
| 31088892  | Anks1    | ankyrin repeat and sterile alpha motif domain containing 1       | 0  | 1  | 1  |
| 323423025 | Ankrd11  | ankyrin repeat domain 11                                         | 0  | 0  | 1  |
| 71834683  | Ankrd12  | ankyrin repeat domain 12                                         | 0  | 1  | 0  |
| 61651675  | Ankrd13a | ankyrin repeat domain 13a                                        | 0  | 0  | 1  |
| 67972431  | Ankrd13c | ankyrin repeat domain 13c                                        | 0  | 0  | 1  |
| 261878577 | Ankrd24  | ankyrin repeat domain 24                                         | 1  | 0  | 0  |
| 124487433 | Ankrd26  | ankyrin repeat domain 26                                         | 1  | 0  | 0  |
| 167466274 | Ankrd32  | ankyrin repeat domain 32                                         | 1  | 0  | 0  |
| 268607611 | Ankrd50  | ankyrin repeat domain 50                                         | 1  | 0  | 0  |
| 124517663 | Anxa1    | annexin A1                                                       | 26 | 0  | 2  |
| 160707921 | Anxa11   | annexin A11                                                      | 9  | 0  | 2  |
| 6996913   | Anxa2    | annexin A2                                                       | 6  | 18 | 5  |
| 160707925 | Anxa3    | annexin A3                                                       | 1  | 0  | 0  |
| 161016799 | Anxa4    | annexin A4                                                       | 18 | 2  | 1  |
| 6753060   | Anxa5    | annexin A5                                                       | 19 | 0  | 4  |
| 31981302  | Anxa6    | annexin A6 isoform a                                             | 28 | 1  | 1  |
| 160707958 | Anxa7    | annexin A7                                                       | 5  | 0  | 1  |
| 145864497 | Anxa9    | annexin A9                                                       | 10 | 19 | 18 |
| 169234624 | Mki67    | antigen identified by monoclonal antibody Ki 67                  | 1  | 8  | 1  |
| 258613873 | Apip     | APAF1 interacting protein                                        | 2  | 0  | 0  |
| 6753086   | Apex1    | APEX nuclease 1                                                  | 5  | 17 | 2  |
| 21553309  | Apoa1bp  | apolipoprotein A-I binding protein                               | 6  | 0  | 0  |
| 313569874 | Apoo     | apolipoprotein O                                                 | 2  | 0  | 1  |
| 13386062  | Apool    | apolipoprotein O-like                                            | 2  | 0  | 7  |
| 9790013   | Aatf     | apoptosis antagonizing transcription factor                      | 0  | 0  | 5  |
| 94158994  | Api5     | apoptosis inhibitor 5                                            | 2  | 19 | 3  |
| 6755004   | Aifm1    | apoptosis-inducing factor, mitochondrion-associated 1            | 23 | 2  | 9  |
| 194394197 | Acin1    | apoptotic chromatin condensation inducer 1 isoform 2             | 0  | 18 | 14 |
| 160415209 | Aqp2     | aquaporin 2                                                      | 4  | 1  | 3  |
| 163644327 | Aqr      | aquarius                                                         | 0  | 13 | 11 |
| 148747410 | Arcn1    | archain 1                                                        | 12 | 0  | 2  |
| 206597526 | Ddef2    | ArfGAP with SH3 domain, ankyrin repeat and PH domain 2 isoform b | 0  | 1  | 1  |
| 269973913 | Sfrs14   | arginine/serine-rich 14 splicing factor                          | 0  | 1  | 0  |

|           |         |                                                                                   |    |    |    |
|-----------|---------|-----------------------------------------------------------------------------------|----|----|----|
| 53988376  | Rsrc2   | arginine/serine-rich coiled-coil 2 isoform 1                                      | 0  | 1  | 0  |
| 224967104 | Sfrs6   | arginine/serine-rich splicing factor 6                                            | 5  | 2  | 5  |
| 19526986  | Asl     | argininosuccinate lyase                                                           | 2  | 0  | 0  |
| 6996911   | Ass1    | argininosuccinate synthetase 1                                                    | 2  | 0  | 0  |
| 318065085 | Rnpepl1 | arginyl aminopeptidase (aminopeptidase B)-like 1                                  | 0  | 0  | 1  |
| 227499234 | Rnpep   | arginyl aminopeptidase isoform 1                                                  | 8  | 0  | 1  |
| 262118273 | Rars    | arginyl-tRNA synthetase                                                           | 21 | 2  | 0  |
| 40254129  | Arvcf   | armadillo repeat gene deleted in velo-cardio-facial syndrome                      | 0  | 0  | 2  |
| 21312676  | Armc1   | armadillo repeat-containing protein                                               | 1  | 0  | 0  |
| 8392847   | Actr1a  | ARP1 actin-related protein 1 homolog A, centractin alpha                          | 7  | 9  | 1  |
| 22122615  | Actr1b  | ARP1 actin-related protein 1 homolog B, centractin beta                           | 2  | 1  | 0  |
| 329664973 | Actr3   | ARP3 actin-related protein 3 homolog                                              | 10 | 17 | 12 |
| 91176335  | Actr5   | ARP5 actin-related protein 5 homolog                                              | 0  | 7  | 0  |
| 188528622 | Actr8   | ARP8 actin-related protein 8 homolog                                              | 0  | 2  | 0  |
| 12025542  | Asna1   | arsA arsenite transporter, ATP-binding, homolog 1                                 | 4  | 0  | 1  |
| 158186674 | Srrt    | arsenate resistance protein 2 isoform 1                                           | 4  | 23 | 4  |
| 30520239  | Nceh1   | arylacetamide deacetylase-like 1                                                  | 10 | 0  | 1  |
| 7709982   | Aip     | aryl-hydrocarbon receptor-interacting protein                                     | 5  | 0  | 0  |
| 67972647  | Arsa    | arylsulfatase A                                                                   | 7  | 0  | 0  |
| 125656171 | Arsb    | arylsulfatase B                                                                   | 1  | 1  | 0  |
| 13384964  | Asf1a   | ASF1 anti-silencing function 1 homolog A                                          | 0  | 5  | 0  |
| 124248552 | Ash2l   | ash2-like isoform b                                                               | 0  | 9  | 1  |
| 33469123  | Asns    | asparagine synthetase                                                             | 2  | 0  | 0  |
| 13195608  | Alg14   | asparagine-linked glycosylation 14 homolog                                        | 0  | 0  | 1  |
| 19527202  | Alg9    | asparagine-linked glycosylation 9 protein                                         | 0  | 0  | 1  |
| 219276601 | Nars    | asparaginyl-tRNA synthetase isoform 2                                             | 2  | 6  | 0  |
| 295390613 | Asph    | aspartate beta-hydroxylase isoform 1                                              | 13 | 1  | 4  |
| 161016822 | Dnpep   | aspartyl aminopeptidase isoform b                                                 | 9  | 0  | 0  |
| 326439050 | Aga     | aspartylglucosaminidase                                                           | 5  | 0  | 0  |
| 27369928  | Dars2   | aspartyl-tRNA synthetase 2, mitochondrial                                         | 1  | 0  | 0  |
| 210147402 | Dars    | aspartyl-tRNA synthetase isoform 1                                                | 23 | 19 | 1  |
| 158508460 | Ahctf1  | AT hook containing transcription factor 1                                         | 0  | 2  | 9  |
| 124249109 | Arid1a  | AT rich interactive domain 1A                                                     | 0  | 5  | 1  |
| 145553997 | Arid1b  | AT rich interactive domain 1B (Swi1 like)                                         | 0  | 1  | 0  |
| 262231796 | Arid2   | AT rich interactive domain 2 (ARID, RFX-like)                                     | 0  | 4  | 0  |
| 189339266 | Atr     | ataxia telangiectasia and rad3 related                                            | 1  | 0  | 0  |
| 163838660 | Atm     | ataxia telangiectasia mutated                                                     | 0  | 2  | 0  |
| 83649709  | Atxn10  | ataxin 10                                                                         | 1  | 0  | 1  |
| 33942089  | Atxn2l  | ataxin 2-like                                                                     | 1  | 1  | 0  |
| 313151222 | Acly    | ATP citrate lyase                                                                 | 21 | 0  | 1  |
| 78214312  | Atp5f1  | ATP synthase, H+ transporting, mitochondrial F0 complex, subunit b, isoform 1     | 7  | 3  | 8  |
| 21313679  | Atp5h   | ATP synthase, H+ transporting, mitochondrial F0 complex, subunit d                | 7  | 1  | 9  |
| 10181184  | Atp5j2  | ATP synthase, H+ transporting, mitochondrial F0 complex, subunit f, isoform 2     | 2  | 0  | 2  |
| 31980744  | Atp5l   | ATP synthase, H+ transporting, mitochondrial F0 complex, subunit G                | 1  | 0  | 2  |
| 6680748   | Atp5a1  | ATP synthase, H+ transporting, mitochondrial F1 complex, alpha subunit, isoform 1 | 33 | 5  | 20 |
| 166851828 | Atp5d   | ATP synthase, H+ transporting, mitochondrial F1 complex, delta subunit precursor  | 6  | 3  | 2  |

|           |          |                                                                                      |    |   |    |
|-----------|----------|--------------------------------------------------------------------------------------|----|---|----|
| 13385484  | Atp5e    | ATP synthase, H+ transporting, mitochondrial F1 complex, epsilon subunit             | 2  | 0 | 0  |
| 163838648 | Atp5c1   | ATP synthase, H+ transporting, mitochondrial F1 complex, gamma subunit isoform a     | 11 | 1 | 6  |
| 20070412  | Atp5o    | ATP synthase, H+ transporting, mitochondrial F1 complex, O subunit                   | 10 | 7 | 9  |
| 83715998  | Atp5k    | ATP synthase, H+ transporting, mitochondrial F1F0 complex, subunit e                 | 5  | 1 | 2  |
| 31560168  | Atad1    | ATPase family, AAA domain containing 1                                               | 1  | 0 | 8  |
| 91199557  | Atad2    | ATPase family, AAA domain containing 2                                               | 0  | 0 | 31 |
| 153791220 | Atad2b   | ATPase family, AAA domain containing 2B                                              | 0  | 0 | 23 |
| 22122505  | Atad4    | ATPase family, AAA domain containing 4                                               | 0  | 0 | 1  |
| 31982864  | Atpif1   | ATPase inhibitory factor 1                                                           | 6  | 4 | 0  |
| 283135194 | Atp13a1  | ATPase type 13A1                                                                     | 0  | 1 | 0  |
| 158635979 | Atp2a2   | ATPase, Ca++ transporting, slow twitch 2 isoform b                                   | 8  | 0 | 0  |
| 320089590 | Atp9b    | ATPase, class II, type 9B                                                            | 1  | 0 | 0  |
| 7656914   | Atp11a   | ATPase, class VI, type 11A                                                           | 1  | 0 | 0  |
| 157951682 | Atp7a    | ATPase, Cu++ transporting, alpha polypeptide isoform 2                               | 2  | 0 | 0  |
| 12025532  | Atp6v0a1 | ATPase, H+ transporting, lysosomal V0 subunit a1                                     | 0  | 0 | 4  |
| 83627707  | Atp6v0a2 | ATPase, H+ transporting, lysosomal V0 subunit A2                                     | 0  | 0 | 1  |
| 6753144   | Atp6v0c  | ATPase, H+ transporting, lysosomal V0 subunit C                                      | 1  | 0 | 3  |
| 31560731  | Atp6v1a  | ATPase, H+ transporting, lysosomal V1 subunit A                                      | 19 | 0 | 16 |
| 189339262 | Atp6v1c1 | ATPase, H+ transporting, lysosomal V1 subunit C1                                     | 2  | 0 | 1  |
| 31981588  | Atp6v1h  | ATPase, H+ transporting, lysosomal V1 subunit H                                      | 5  | 0 | 5  |
| 31981304  | Atp6v0d1 | ATPase, H+ transporting, V0 subunit D isoform 1                                      | 11 | 1 | 10 |
| 12963799  | Atp6v1d  | ATPase, H+ transporting, V1 subunit D                                                | 2  | 0 | 0  |
| 88853071  | Abca3    | ATP-binding cassette, sub-family A (ABC1), member 3                                  | 1  | 0 | 0  |
| 15451840  | Abca7    | ATP-binding cassette, sub-family A, member 7                                         | 1  | 0 | 0  |
| 169234938 | Abcb7    | ATP-binding cassette, sub-family B (MDR/TAP), member 7                               | 6  | 0 | 0  |
| 90403595  | Abcc3    | ATP-binding cassette, sub-family C (CFTR/MRP), member 3                              | 2  | 0 | 0  |
| 255683328 | Abcc4    | ATP-binding cassette, sub-family C (CFTR/MRP), member 4                              | 3  | 0 | 0  |
| 6678848   | Abcc1    | ATP-binding cassette, sub-family C, member 1                                         | 10 | 0 | 2  |
| 6671497   | Abcd1    | ATP-binding cassette, sub-family D, member 1                                         | 0  | 1 | 0  |
| 60218877  | Abcd3    | ATP-binding cassette, sub-family D, member 3                                         | 16 | 0 | 22 |
| 114205431 | Abce1    | ATP-binding cassette, subfamily E, member 1                                          | 4  | 0 | 0  |
| 39930335  | Abcf1    | ATP-binding cassette, sub-family F (GCN20), member 1                                 | 5  | 5 | 0  |
| 299473734 | Abcf2    | ATP-binding cassette, sub-family F (GCN20), member 2                                 | 0  | 5 | 0  |
| 116268115 | Auh      | AU RNA binding protein/enoyl-Coenzyme A hydratase                                    | 1  | 0 | 0  |
| 13386102  | Rnaseh2c | AYP1 protein                                                                         | 0  | 4 | 0  |
| 145587077 | Bdp1     | B double prime 1, subunit of RNA polymerase III transcription initiation factor IIIB | 0  | 1 | 1  |
| 59859890  | Birc5    | baculoviral IAP repeat-containing 5 isoform 1                                        | 0  | 1 | 0  |
| 133922596 | Birc6    | baculoviral IAP repeat-containing 6                                                  | 8  | 0 | 0  |
| 21313234  | Baiap2l1 | BAI1-associated protein 2-like 1                                                     | 0  | 5 | 1  |
| 46519149  | Heatr1   | BAP28 protein                                                                        | 0  | 3 | 29 |
| 84042521  | Banf1    | barrier to autointegration factor 1                                                  | 2  | 2 | 7  |
| 10048460  | Bcam     | basal cell adhesion molecule                                                         | 4  | 0 | 0  |
| 6755680   | Bhlhe40  | basic helix-loop-helix family, member e40                                            | 0  | 0 | 1  |
| 13385296  | Bzw1     | basic leucine zipper and W2 domains 1                                                | 2  | 0 | 0  |
| 31981160  | Bzw2     | basic leucine zipper and W2 domains 2                                                | 1  | 0 | 1  |
| 237649007 | Blzf1    | basic leucine zipper nuclear factor 1 isoform a                                      | 0  | 0 | 1  |
| 281485611 | Btf3     | basic transcription factor 3                                                         | 5  | 3 | 0  |

|           |               |                                                                                        |    |    |    |
|-----------|---------------|----------------------------------------------------------------------------------------|----|----|----|
| 29789195  | Btf3l4        | basic transcription factor 3-like 4                                                    | 3  | 1  | 0  |
| 116014342 | Bsg           | basigin isoform 1                                                                      | 10 | 0  | 0  |
| 22296593  | Bcl7a         | B-cell CLL/lymphoma 7A                                                                 | 0  | 2  | 0  |
| 6753176   | Bcl7c         | B-cell CLL/lymphoma 7C                                                                 | 0  | 2  | 1  |
| 56606137  | Bcl9          | B-cell CLL/lymphoma 9                                                                  | 0  | 1  | 0  |
| 6671620   | Bcap29        | B-cell receptor-associated protein 29                                                  | 2  | 0  | 1  |
| 31981310  | Bcap31        | B-cell receptor-associated protein 31                                                  | 7  | 0  | 3  |
| 126723336 | Phb2          | B-cell receptor-associated protein 37                                                  | 16 | 3  | 13 |
| 21312030  | 1110007C09Rik | Bcl10-interacting protein with Card                                                    | 0  | 0  | 2  |
| 33239415  | Pthr2         | Bcl-2 inhibitor of transcription isoform a                                             | 4  | 2  | 5  |
| 255003752 | Bnip1         | BCL2/adenovirus E1B interacting protein 1                                              | 4  | 0  | 0  |
| 111955302 | Bak1          | BCL2-antagonist/killer 1                                                               | 2  | 0  | 7  |
| 6671610   | Bad           | BCL2-associated agonist of cell death                                                  | 1  | 0  | 0  |
| 21703784  | Bag2          | Bcl2-associated athanogene 2                                                           | 3  | 3  | 8  |
| 70906449  | Bclaf1        | BCL2-associated transcription factor 1 isoform 2                                       | 2  | 3  | 5  |
| 6680770   | Bax           | Bcl2-associated X protein                                                              | 1  | 0  | 0  |
| 23943828  | Bcl2l13       | BCL2-like 13                                                                           | 7  | 0  | 0  |
| 7949082   | Bok           | BCL2-related ovarian killer protein                                                    | 0  | 0  | 1  |
| 269995993 | Bcor          | BCL-6 interacting corepressor isoform d                                                | 0  | 1  | 1  |
| 21313544  | Bcs1l         | BCS1-like                                                                              | 2  | 0  | 0  |
| 189339268 | B4galnt1      | beta-1,4-N-acetyl-galactosaminyl transferase 1 isoform 1                               | 2  | 0  | 0  |
| 225543122 | Bace1         | beta-site APP cleaving enzyme 1 isoform 1                                              | 1  | 0  | 0  |
| 163838766 | Bicd1         | bicaudal D homolog 1 isoform 2                                                         | 1  | 0  | 1  |
| 124487331 | Blvra         | biliverdin reductase A                                                                 | 4  | 0  | 0  |
| 21450325  | Blvrb         | biliverdin reductase B (flavin reductase (NADPH))                                      | 4  | 0  | 2  |
| 31980697  | Bloc1s1       | biogenesis of lysosome-related organelles complex-1, subunit 1                         | 1  | 0  | 0  |
| 124487265 | Bod1l         | biorientation of chromosomes in cell division 1-like                                   | 1  | 13 | 0  |
| 21624609  | Bphl          | biphenyl hydrolase-like (serine hydrolase, breast epithelial mucin-associated antigen) | 7  | 0  | 0  |
| 114326546 | Pgam1         | bisphosphoglycerate mutase 1                                                           | 18 | 1  | 9  |
| 30519997  | Blmh          | bleomycin hydrolase                                                                    | 2  | 0  | 0  |
| 7304931   | Bop1          | block of proliferation 1                                                               | 1  | 0  | 6  |
| 226693393 | Blm           | Bloom syndrome protein homolog isoform 1                                               | 1  | 0  | 0  |
| 46559391  | Bmi1          | Bmi1 polycomb ring finger oncogene                                                     | 0  | 2  | 0  |
| 18129622  | Bmp2k         | BMP2 inducible kinase                                                                  | 0  | 0  | 1  |
| 39930555  | Bms1          | BMS1-like, ribosome assembly protein                                                   | 0  | 2  | 8  |
| 58037151  | Bola1         | bolA-like 1                                                                            | 4  | 0  | 0  |
| 45598372  | Basp1         | brain abundant, membrane attached signal protein 1                                     | 5  | 7  | 5  |
| 24418919  | Pygb          | brain glycogen phosphorylase                                                           | 19 | 0  | 6  |
| 21312594  | Brp44         | brain protein 44                                                                       | 2  | 0  | 0  |
| 9055178   | Brp44l        | brain protein 44-like                                                                  | 0  | 0  | 1  |
| 262231776 | Baiap2        | brain-specific angiogenesis inhibitor 1-associated protein 2 isoform c                 | 7  | 14 | 3  |
| 6753164   | Bckdk         | branched chain ketoacid dehydrogenase kinase                                           | 1  | 2  | 0  |
| 262050570 | Brcc3         | BRCA1/BRCA2-containing complex, subunit 3                                              | 1  | 0  | 0  |
| 161016835 | Brca1         | breast cancer 1                                                                        | 0  | 0  | 1  |
| 124487411 | Brca2         | breast cancer 2                                                                        | 0  | 0  | 1  |
| 83649717  | Brms1l        | breast cancer metastasis-suppressor 1-like                                             | 0  | 1  | 0  |
| 70906453  | Bcas2         | breast carcinoma amplified sequence 2                                                  | 0  | 9  | 6  |
| 58037467  | Bri3bp        | Bri3 binding protein                                                                   | 2  | 1  | 3  |
| 134053947 | Bin1          | bridging integrator 1 isoform 1                                                        | 1  | 0  | 0  |
| 10946638  | Bin3          | bridging integrator 3                                                                  | 0  | 0  | 1  |

|           |               |                                                                        |    |    |    |
|-----------|---------------|------------------------------------------------------------------------|----|----|----|
| 141802630 | Bxdc2         | BRIX                                                                   | 0  | 0  | 3  |
| 110347521 | Bxdc1         | brix domain containing 1 isoform 2                                     | 0  | 0  | 5  |
| 189339272 | Baz1a         | bromodomain adjacent to zinc finger domain 1A                          | 1  | 21 | 4  |
| 170295818 | Baz1b         | bromodomain adjacent to zinc finger domain, 1B                         | 0  | 17 | 25 |
| 114205435 | Baz2a         | bromodomain adjacent to zinc finger domain, 2A                         | 0  | 3  | 2  |
| 62177117  | Baz2b         | bromodomain adjacent to zinc finger domain, 2B                         | 1  | 1  | 0  |
| 157057184 | Brdw1         | bromodomain and WD repeat domain containing 1 isoform A                | 1  | 0  | 1  |
| 125490358 | Brdw3         | bromodomain and WD repeat domain containing 3                          | 1  | 0  | 0  |
| 164698417 | Brd1          | bromodomain containing 1                                               | 0  | 0  | 3  |
| 71067345  | Brd2          | bromodomain containing 2 isoform a                                     | 0  | 2  | 0  |
| 165972335 | Brd3          | bromodomain containing 3 isoform 2                                     | 0  | 7  | 0  |
| 226246640 | Brd4          | bromodomain containing 4 isoform 1                                     | 1  | 8  | 0  |
| 6755234   | Brd7          | bromodomain containing 7                                               | 0  | 5  | 1  |
| 185134208 | Brd8          | bromodomain containing 8                                               | 0  | 8  | 0  |
| 112817628 | Brd9          | bromodomain containing 9                                               | 0  | 1  | 0  |
| 140969817 | Bptf          | bromodomain PHD finger transcription factor                            | 1  | 11 | 2  |
| 123858774 | Btaf1         | BTAf1 RNA polymerase II, B-TFIID transcription factor-associated       | 1  | 2  | 4  |
| 158534069 | Banp          | Btg3 associated nuclear protein isoform 2                              | 1  | 2  | 0  |
| 31560618  | Bub3          | budding uninhibited by benzimidazoles 3 homolog                        | 2  | 10 | 0  |
| 164698440 | Bysl          | bystin-like                                                            | 1  | 1  | 2  |
| 7305107   | Grcc10        | C10 protein                                                            | 0  | 1  | 0  |
| 31542251  | C1d           | C1D nuclear receptor co-repressor                                      | 0  | 1  | 0  |
| 162951870 | Abl1          | c-abl oncogene 1, receptor tyrosine kinase isoform b                   | 0  | 1  | 0  |
| 6753374   | Cdh1          | cadherin 1                                                             | 14 | 5  | 10 |
| 6680900   | Cdh16         | cadherin 16                                                            | 24 | 0  | 2  |
| 83715978  | Cdh3          | cadherin 3 isoform b                                                   | 0  | 0  | 1  |
| 70995287  | Cabin1        | calcineurin binding protein 1                                          | 0  | 2  | 1  |
| 21450201  | Cbara1        | calcium binding atopy-related autoantigen 1                            | 3  | 3  | 2  |
| 161086893 | Cab39         | calcium binding protein 39                                             | 3  | 0  | 0  |
| 31541826  | Cab39l        | calcium binding protein 39-like                                        | 6  | 0  | 0  |
| 9790225   | 1500003O03Rik | calcium binding protein P22                                            | 4  | 1  | 1  |
| 295444836 | Cacna1g       | calcium channel, voltage-dependent, T type, alpha 1G subunit isoform b | 0  | 1  | 1  |
| 85362742  | Camk2g        | calcium/calmodulin-dependent protein kinase II gamma isoform 2         | 2  | 1  | 0  |
| 70906479  | Camk2d        | calcium/calmodulin-dependent protein kinase II, delta isoform 3        | 3  | 6  | 0  |
| 21703722  | Camkk2        | calcium/calmodulin-dependent protein kinase kinase 2, beta             | 0  | 1  | 1  |
| 133504495 | Cask          | calcium/calmodulin-dependent serine protein kinase                     | 1  | 0  | 1  |
| 27369998  | Slc25a24      | calcium-binding transporter                                            | 16 | 0  | 1  |
| 13385290  | Carhsp1       | calcium-regulated heat-stable protein (24kD)                           | 1  | 0  | 0  |
| 33468885  | Cacybp        | calcyclin binding protein                                              | 3  | 0  | 0  |
| 21704156  | Cald1         | caldesmon 1                                                            | 1  | 5  | 0  |
| 100816903 | Clmn          | calmin isoform a                                                       | 0  | 2  | 17 |
| 6680834   | Calm3         | calmodulin 3                                                           | 3  | 6  | 8  |
| 30017453  | Camta2        | calmodulin binding transcription activator 2                           | 0  | 0  | 1  |
| 124486889 | Camsap111     | calmodulin regulated spectrin-associated protein 1-like 1              | 1  | 1  | 2  |
| 156447039 | Calml4        | calmodulin-like 4 isoform a                                            | 1  | 0  | 0  |
| 160333216 | Canx          | calnexin                                                               | 29 | 1  | 8  |
| 160333229 | Capn1         | calpain 1, large subunit                                               | 21 | 0  | 1  |
| 157951598 | Capn2         | calpain 2                                                              | 3  | 0  | 2  |
| 6680846   | Capn5         | calpain 5                                                              | 0  | 0  | 8  |

|           |          |                                                                                  |    |    |    |
|-----------|----------|----------------------------------------------------------------------------------|----|----|----|
| 110227381 | Capns1   | calpain, small subunit 1                                                         | 7  | 0  | 1  |
| 33563246  | Cast     | calpastatin                                                                      | 5  | 5  | 0  |
| 6680952   | Cnn2     | calponin 2                                                                       | 1  | 0  | 0  |
| 21312564  | Cnn3     | calponin 3, acidic                                                               | 2  | 0  | 6  |
| 6680836   | Calr     | calreticulin                                                                     | 22 | 0  | 2  |
| 41282022  | Calu     | calumenin isoform 2                                                              | 11 | 0  | 0  |
| 158966707 | Creb1    | cAMP responsive element binding protein 1 isoform A                              | 0  | 1  | 0  |
| 125628638 | Casc5    | cancer susceptibility candidate 5                                                | 1  | 0  | 0  |
| 157951604 | Cap1     | CAP, adenylate cyclase-associated protein 1                                      | 12 | 0  | 2  |
| 158631217 | Cic      | capicua homolog isoform a                                                        | 0  | 0  | 1  |
| 6671672   | Capza2   | capping protein (actin filament) muscle Z-line, alpha 2                          | 4  | 8  | 10 |
| 6753262   | Capzb    | capping protein (actin filament) muscle Z-line, beta isoform b                   | 8  | 12 | 11 |
| 51093867  | Cad      | carbamoyl-phosphate synthetase 2, aspartate transcarbamylase, and dihydroorotase | 1  | 0  | 0  |
| 157951596 | Car2     | carbonic anhydrase II                                                            | 10 | 0  | 2  |
| 211057396 | Car5b    | carbonic anhydrase VB, mitochondrial                                             | 3  | 0  | 0  |
| 269784762 | Cbr4     | carbonic reductase 4                                                             | 2  | 9  | 2  |
| 113680352 | Cbr1     | carbonyl reductase 1                                                             | 2  | 0  | 0  |
| 6671688   | Cbr2     | carbonyl reductase 2                                                             | 16 | 2  | 10 |
| 27413160  | Cbr3     | carbonyl reductase 3                                                             | 4  | 0  | 1  |
| 158635992 | Pdlim1   | carboxyl terminal LIM domain protein 1                                           | 10 | 0  | 0  |
| 150378501 | Cpd      | carboxypeptidase D                                                               | 2  | 0  | 0  |
| 189458849 | Cpm      | carboxypeptidase M                                                               | 1  | 0  | 6  |
| 15638942  | lft81    | carnitine deficiency-associated gene expressed in ventricle 1                    | 0  | 0  | 1  |
| 17157983  | Crot     | carnitine O-octanoyltransferase                                                  | 10 | 0  | 1  |
| 162287142 | Cpt1a    | carnitine palmitoyltransferase 1A liver                                          | 17 | 6  | 10 |
| 10048462  | Slc25a20 | carnitine/acylcarnitine translocase                                              | 6  | 0  | 2  |
| 31542425  | Csnk1e   | casein kinase 1 epsilon                                                          | 0  | 1  | 0  |
| 22165382  | Csnk1a1  | casein kinase 1, alpha 1                                                         | 1  | 11 | 7  |
| 20544149  | Csnk1d   | casein kinase 1, delta isoform 2                                                 | 0  | 1  | 1  |
| 113462019 | Csnk1g3  | casein kinase 1, gamma 3                                                         | 0  | 1  | 0  |
| 31542427  | Csnk2a1  | casein kinase 2, alpha 1 polypeptide                                             | 8  | 9  | 0  |
| 6753540   | Csnk2a2  | casein kinase 2, alpha prime polypeptide                                         | 1  | 6  | 0  |
| 7106277   | Csnk2b   | casein kinase 2, beta polypeptide                                                | 5  | 4  | 0  |
| 8393156   | Clpp     | caseinolytic peptidase, ATP-dependent, proteolytic subunit                       | 7  | 0  | 0  |
| 80978932  | Cbl      | Casitas B-lineage lymphoma                                                       | 0  | 1  | 0  |
| 86198303  | Cflar    | CASP8 and FADD-like apoptosis regulator isoform 2                                | 1  | 0  | 0  |
| 6753284   | Casp3    | caspase 3                                                                        | 1  | 0  | 0  |
| 6680850   | Casp7    | caspase 7                                                                        | 2  | 0  | 0  |
| 122056578 | Casp8    | caspase 8                                                                        | 2  | 0  | 0  |
| 172072595 | Casp8ap2 | caspase 8 associated protein 2                                                   | 0  | 0  | 1  |
| 157951741 | Cat      | catalase                                                                         | 14 | 0  | 1  |
| 42475974  | Pik3c3   | catalytic phosphatidylinositol 3-kinase 3                                        | 0  | 1  | 0  |
| 227330565 | Ctnn1    | catenin (cadherin associated protein), alpha-like 1                              | 2  | 4  | 0  |
| 260166642 | Ctnnb1   | catenin (cadherin associated protein), beta 1, 88kDa                             | 7  | 6  | 25 |
| 6753294   | Ctnna1   | catenin alpha 1                                                                  | 37 | 23 | 43 |
| 254540032 | Ctnnb1   | catenin, beta like 1                                                             | 7  | 19 | 1  |
| 146231979 | Ctnnd1   | catenin, delta 1 isoform 1                                                       | 14 | 7  | 26 |
| 84042525  | Ctsa     | cathepsin A isoform a                                                            | 9  | 0  | 0  |
| 6681079   | Ctsb     | cathepsin B preproprotein                                                        | 12 | 1  | 1  |
| 160707990 | Ctsc     | cathepsin C preproprotein                                                        | 6  | 1  | 0  |



|           |          |                                                                                          |    |    |    |
|-----------|----------|------------------------------------------------------------------------------------------|----|----|----|
| 6753556   | Ctsd     | cathepsin D                                                                              | 19 | 1  | 0  |
| 166235890 | Ctsh     | cathepsin H preproprotein                                                                | 6  | 0  | 0  |
| 11968166  | Ctsz     | cathepsin Z preproprotein                                                                | 3  | 0  | 0  |
| 6680854   | Cav1     | caveolin 1, caveolae protein                                                             | 1  | 2  | 3  |
| 18702317  | Cav2     | caveolin 2                                                                               | 4  | 1  | 3  |
| 254692991 | Exosc8   | CBP-interacting protein 3 isoform 2                                                      | 0  | 8  | 1  |
| 6753404   | Cebpb    | CCAAT/enhancer binding protein beta                                                      | 0  | 1  | 1  |
| 61966683  | Cebpg    | CCAAT/enhancer binding protein gamma                                                     | 0  | 1  | 0  |
| 67188876  | Cebpz    | CCAAT/enhancer binding protein zeta                                                      | 0  | 5  | 4  |
| 31044459  | Ctcf     | CCCTC-binding factor                                                                     | 0  | 24 | 4  |
| 327315392 | Cnot1    | CCR4-NOT transcription complex, subunit 1 isoform 2                                      | 1  | 1  | 0  |
| 22122717  | Cnot3    | CCR4-NOT transcription complex, subunit 3                                                | 1  | 0  | 0  |
| 19526794  | Cd81     | CD 81 antigen                                                                            | 1  | 0  | 0  |
| 161353456 | Cd151    | CD151 antigen                                                                            | 1  | 0  | 0  |
| 17505208  | Cd2bp2   | CD2 antigen (cytoplasmic tail) binding protein 2                                         | 0  | 0  | 1  |
| 125987599 | Cd2ap    | CD2-associated protein                                                                   | 9  | 14 | 0  |
| 6754382   | Cd47     | CD47 antigen                                                                             | 2  | 0  | 0  |
| 209862915 | Cd82     | CD82 antigen isoform 1                                                                   | 2  | 0  | 0  |
| 6680894   | Cd9      | CD9 antigen                                                                              | 3  | 0  | 0  |
| 68448515  | Cdc16    | CDC16 cell division cycle 16 homolog                                                     | 0  | 3  | 0  |
| 30387632  | Cdc23    | CDC23 (cell division cycle 23, yeast, homolog)                                           | 0  | 2  | 0  |
| 157816961 | Crks     | Cdc2-related kinase, arginine/serine-rich isoform 3                                      | 1  | 1  | 0  |
| 283135190 | Cdc42bbp | CDC42 binding protein kinase beta                                                        | 2  | 15 | 1  |
| 84781706  | Cdc42se1 | CDC42 small effector 1 isoform 1                                                         | 1  | 0  | 0  |
| 111038135 | Clk1     | CDC-like kinase 1 isoform 2                                                              | 0  | 0  | 1  |
| 254540152 | Clk2     | CDC-like kinase 2 isoform 1                                                              | 0  | 0  | 1  |
| 83745112  | Clk3     | CDC-like kinase 3                                                                        | 0  | 1  | 0  |
| 19527228  | Cisd1    | CDGSH iron sulfur domain 1                                                               | 5  | 0  | 4  |
| 49355794  | Cdk2ap1  | CDK2 (cyclin-dependent kinase 2)-associated protein 1                                    | 0  | 1  | 0  |
| 13384788  | Cdk5rap3 | CDK5 regulatory subunit associated protein 3                                             | 2  | 0  | 0  |
| 19882247  | Ciz1     | CDKN1A interacting zinc finger protein 1                                                 | 0  | 1  | 0  |
| 167234439 | Fam20c   | cDNA sequence BC004044                                                                   | 2  | 0  | 0  |
| 31712002  | Edc4     | cDNA sequence BC022641                                                                   | 1  | 1  | 6  |
| 41235733  | Lymr4    | cDNA sequence BC034664                                                                   | 6  | 1  | 0  |
| 28076897  | Cdipt    | CDP-diacylglycerol-inositol 3-phosphatidyltransferase isoform 2                          | 5  | 1  | 1  |
| 166998947 | Ccpg1    | cell cycle progression 1 isoform 2                                                       | 0  | 0  | 2  |
| 329299065 | Sept7    | cell division cycle 10 homolog                                                           | 2  | 15 | 0  |
| 31542366  | Cdc2a    | cell division cycle 2                                                                    | 0  | 1  | 0  |
| 92373436  | Cdc25a   | cell division cycle 25A                                                                  | 0  | 0  | 1  |
| 161621261 | Cdc25b   | cell division cycle 25B isoform a                                                        | 0  | 0  | 1  |
| 189409171 | Cdc2l5   | cell division cycle 2-like 5 (cholinesterase-related cell division controller) isoform 1 | 0  | 1  | 0  |
| 7949018   | Cdc37    | cell division cycle 37 homolog                                                           | 3  | 0  | 0  |
| 198278501 | Cdc40    | cell division cycle 40 homolog                                                           | 0  | 0  | 4  |
| 6753364   | Cdc42    | cell division cycle 42                                                                   | 8  | 7  | 6  |
| 22779899  | Cdc5l    | cell division cycle 5-like                                                               | 0  | 17 | 10 |
| 126032303 | Cdc7     | cell division cycle 7                                                                    | 1  | 0  | 0  |
| 33563288  | Ccar1    | cell division cycle and apoptosis regulator 1                                            | 2  | 22 | 0  |
| 7305111   | Cdca3    | cell division cycle associated 3                                                         | 0  | 1  | 0  |
| 21313220  | Cdca7    | cell division cycle associated 7                                                         | 0  | 0  | 2  |
| 38372905  | Rab8a    | cell line NK14 derived transforming oncogene                                             | 3  | 2  | 2  |
| 157909784 | Cnbp     | cellular nucleic acid binding protein isoform 3                                          | 4  | 4  | 1  |
| 33469075  | Crabp2   | cellular retinoic acid binding protein II                                                | 6  | 0  | 1  |

|           |         |                                                  |    |    |    |
|-----------|---------|--------------------------------------------------|----|----|----|
| 10257421  | Cetn2   | centrin 2                                        | 0  | 3  | 0  |
| 6680922   | Cetn3   | centrin 3                                        | 0  | 1  | 1  |
| 115648101 | Cenpe   | centromere protein E                             | 1  | 0  | 0  |
| 189458891 | Cenpf   | centromere protein F                             | 0  | 1  | 1  |
| 225543405 | Cenpj   | centromere protein J                             | 1  | 0  | 1  |
| 29789150  | Cenpp   | centromere protein P                             | 0  | 1  | 0  |
| 225703070 | Cenpv   | centromere protein V                             | 0  | 0  | 2  |
| 22165349  | Zw10    | centromere/kinetochore protein zw10              | 1  | 0  | 0  |
| 323462178 | Cep110  | centrosomal protein 110                          | 0  | 1  | 0  |
| 124487356 | Cep152  | centrosomal protein 152                          | 0  | 1  | 0  |
| 256355032 | Cep55   | centrosomal protein 55                           | 1  | 1  | 0  |
| 124301210 | Cspp1   | centrosome and spindle pole associated protein 1 | 1  | 0  | 1  |
| 30520001  | Cggbp1  | CGG triplet repeat binding protein 1             | 0  | 10 | 0  |
| 6753320   | Cct3    | chaperonin containing Tcp1, subunit 3 (gamma)    | 19 | 6  | 6  |
| 6753322   | Cct4    | chaperonin containing Tcp1, subunit 4 (delta)    | 15 | 8  | 2  |
| 6671702   | Cct5    | chaperonin containing Tcp1, subunit 5 (epsilon)  | 16 | 6  | 4  |
| 6753324   | Cct6a   | chaperonin containing Tcp1, subunit 6a           | 14 | 10 | 6  |
| 238814391 | Cct7    | chaperonin containing Tcp1, subunit 7 (eta)      | 17 | 6  | 3  |
| 126521835 | Cct2    | chaperonin subunit 2 (beta)                      | 28 | 8  | 4  |
| 126723461 | Cct8    | chaperonin subunit 8 (theta)                     | 27 | 20 | 1  |
| 31542385  | Chek1   | checkpoint kinase 1                              | 1  | 0  | 0  |
| 188497681 | Chfr    | checkpoint with forkhead and ring finger domains | 1  | 0  | 0  |
| 31982017  | Cx3cl1  | chemokine (C-X3-C motif) ligand 1                | 0  | 0  | 1  |
| 6753436   | Clcn7   | chloride channel 7                               | 0  | 0  | 1  |
| 295293090 | Clcc1   | chloride channel CLIC-like 1                     | 3  | 0  | 1  |
| 15617203  | Clic1   | chloride intracellular channel 1                 | 11 | 1  | 8  |
| 7304963   | Clic4   | chloride intracellular channel 4 (mitochondrial) | 1  | 3  | 0  |
| 21359827  | Chmp7   | CHMP family, member 7                            | 1  | 0  | 0  |
| 210031293 | Chdh    | choline dehydrogenase                            | 15 | 1  | 1  |
| 253683458 | Pcyt1a  | choline phosphate cytidyltransferase 1 alpha     | 1  | 0  | 1  |
| 226442811 | Chpt1   | choline phosphotransferase 1 isoform 2           | 1  | 0  | 0  |
| 12963733  | Slc44a4 | choline transporter-like protein 4               | 0  | 0  | 1  |
| 31559983  | Cept1   | choline/ethanolaminephosphotransferase 1         | 3  | 0  | 2  |
| 36031035  | Smc3    | chondroitin sulfate proteoglycan 6               | 3  | 49 | 31 |
| 110681714 | Chm     | choroideremia                                    | 0  | 0  | 1  |
| 67782360  | Esyt2   | chr2 synaptotagmin                               | 12 | 0  | 0  |
| 18860511  | Chrac1  | chromatin accessibility complex 1                | 0  | 3  | 1  |
| 21312470  | Chaf1b  | chromatin assembly factor 1 subunit B            | 0  | 3  | 0  |
| 31982546  | Cdt1    | chromatin licensing and DNA replication factor 1 | 1  | 0  | 0  |
| 21704220  | Chmp1a  | chromatin modifying protein 1A                   | 1  | 0  | 1  |
| 13195618  | Chmp1b  | chromatin modifying protein 1B                   | 0  | 1  | 0  |
| 21312151  | Chmp2a  | chromatin modifying protein 2A                   | 0  | 1  | 0  |
| 28077049  | Chmp4b  | chromatin modifying protein 4B                   | 1  | 1  | 3  |
| 147904547 | Chmp6   | chromatin modifying protein 6                    | 1  | 0  | 0  |
| 21450179  | Cbx7    | chromobox 7                                      | 0  | 1  | 0  |
| 6671696   | Cbx1    | chromobox homolog 1                              | 1  | 6  | 6  |
| 108860695 | Cbx3    | chromobox homolog 3                              | 2  | 7  | 7  |
| 158966694 | Cbx5    | chromobox homolog 5                              | 0  | 8  | 10 |
| 61657984  | Cbx6    | chromobox homolog 6                              | 1  | 1  | 1  |
| 239985588 | Chd1    | chromodomain helicase DNA binding protein 1      | 0  | 0  | 3  |
| 189458810 | Chd2    | chromodomain helicase DNA binding protein 2      | 0  | 2  | 2  |
| 124358950 | Chd3    | chromodomain helicase DNA binding protein 3      | 2  | 10 | 0  |
| 39204553  | Chd4    | chromodomain helicase DNA binding protein 4      | 0  | 54 | 23 |
| 61742812  | Chd6    | chromodomain helicase DNA binding protein 6      | 0  | 1  | 0  |

|           |               |                                                           |    |    |    |
|-----------|---------------|-----------------------------------------------------------|----|----|----|
| 12963737  | Cse1l         | chromosome segregation 1-like                             | 19 | 0  | 9  |
| 84000434  | Chtf8         | chromosome transmission fidelity factor 8                 | 0  | 0  | 1  |
| 189458807 | Cgn           | cingulin                                                  | 1  | 5  | 22 |
| 56550079  | Cgnl1         | cingulin-like 1                                           | 0  | 0  | 1  |
| 163954951 | Cirh1a        | cirhin                                                    | 0  | 0  | 8  |
| 23956166  | 3300001P08Rik | cisplatin resistance-associated overexpressed protein     | 1  | 7  | 2  |
| 13385942  | Cs            | citrate synthase                                          | 12 | 8  | 2  |
| 266458391 | Kras          | c-K-ras2 protein                                          | 2  | 3  | 3  |
| 225543339 | Clspn         | claspin                                                   | 1  | 0  | 0  |
| 31982511  | Adh5          | class III alcohol dehydrogenase, chi subunit              | 6  | 0  | 0  |
| 31560625  | Adh7          | class IV alcohol dehydrogenase, mu or sigma subunit       | 6  | 0  | 0  |
| 154240730 | Clint1        | clathrin interactor 1                                     | 14 | 0  | 3  |
| 51491845  | Cltc          | clathrin, heavy polypeptide (Hc)                          | 68 | 53 | 66 |
| 30794164  | Cltb          | clathrin, light polypeptide (Lcb)                         | 2  | 1  | 4  |
| 122939198 | Clta          | clathrin, light polypeptide A isoform a                   | 2  | 2  | 4  |
| 6753438   | Cldn3         | claudin 3                                                 | 3  | 0  | 4  |
| 6753440   | Cldn4         | claudin 4                                                 | 0  | 0  | 3  |
| 9055190   | Cldn6         | claudin 6                                                 | 0  | 0  | 1  |
| 302318906 | Cldn7         | claudin 7                                                 | 1  | 0  | 1  |
| 9055192   | Cldn8         | claudin 8                                                 | 2  | 0  | 3  |
| 61098102  | Cldn9         | claudin 9                                                 | 1  | 0  | 1  |
| 16751835  | Cpsf1         | cleavage and polyadenylation specific factor 1            | 0  | 32 | 5  |
| 8393762   | Cpsf2         | cleavage and polyadenylation specific factor 2            | 0  | 20 | 4  |
| 21312614  | Cpsf3l        | cleavage and polyadenylation specific factor 3-like       | 0  | 7  | 0  |
| 30466247  | Cpsf4         | cleavage and polyadenylation specific factor 4            | 0  | 1  | 0  |
| 62909983  | Cpsf6         | cleavage and polyadenylation specific factor 6            | 4  | 11 | 1  |
| 31980904  | Cpsf3         | cleavage and polyadenylation specificity factor 3         | 0  | 9  | 1  |
| 82617610  | Cstf3         | cleavage stimulation factor subunit 3 isoform 1           | 0  | 20 | 4  |
| 18875338  | Cstf2         | cleavage stimulation factor, &#39; pre-RNA subunit 2      | 0  | 3  | 1  |
| 148277061 | Cstf2t        | cleavage stimulation factor, &#39; pre-RNA subunit 2, tau | 0  | 4  | 1  |
| 13195628  | Cstf1         | cleavage stimulation factor, &#39; pre-RNA, subunit 1     | 0  | 13 | 1  |
| 103472025 | Clptm1        | cleft lip and palate associated transmembrane protein 1   | 4  | 0  | 1  |
| 163644249 | Clasp1        | CLIP-associating protein 1 isoform 1                      | 0  | 0  | 1  |
| 84871978  | Mycbp         | c-myc binding protein                                     | 3  | 4  | 0  |
| 31981273  | Cndp2         | CNDP dipeptidase 2                                        | 20 | 0  | 1  |
| 170172540 | F3            | coagulation factor III                                    | 4  | 0  | 0  |
| 226823359 | Copa          | coatamer protein complex subunit alpha                    | 16 | 1  | 1  |
| 15426055  | Copb1         | coatamer protein complex, subunit beta 1                  | 17 | 0  | 4  |
| 29789080  | Copb2         | coatamer protein complex, subunit beta 2 (beta prime)     | 7  | 0  | 3  |
| 8567340   | Copg2         | coatamer protein complex, subunit gamma 2                 | 6  | 0  | 3  |
| 47059163  | Copg          | coatamer protein complex, subunit gamma isoform 1         | 13 | 0  | 7  |
| 9789913   | Copz1         | coatamer protein complex, subunit zeta 1                  | 3  | 2  | 0  |
| 189458847 | Cobl1         | Cobl-like 1 isoform 1                                     | 7  | 10 | 0  |
| 27229125  | Coasy         | Coenzyme A synthase                                       | 7  | 0  | 0  |
| 13385992  | Coq5          | coenzyme Q5 homolog, methyltransferase                    | 0  | 1  | 1  |
| 283135186 | Coq6          | coenzyme Q6 homolog                                       | 0  | 0  | 2  |
| 33859690  | Coq9          | coenzyme Q9 homolog                                       | 1  | 0  | 0  |
| 6680924   | Cfl1          | cofilin 1, non-muscle                                     | 11 | 12 | 7  |
| 6671746   | Cfl2          | cofilin 2, muscle                                         | 1  | 6  | 0  |
| 228008310 | Ccdc101       | coiled-coil domain containing 101                         | 0  | 5  | 0  |
| 168823441 | Ccdc109a      | coiled-coil domain containing 109A                        | 8  | 1  | 9  |
| 227496903 | Ccdc12        | coiled-coil domain containing 12                          | 0  | 0  | 1  |
| 281183278 | Ccdc127       | coiled-coil domain containing 127                         | 0  | 0  | 2  |

|           |               |                                                                                         |    |    |    |
|-----------|---------------|-----------------------------------------------------------------------------------------|----|----|----|
| 268370059 | Ccdc132       | coiled-coil domain containing 132                                                       | 0  | 1  | 1  |
| 151101194 | lft74         | coiled-coil domain containing 2                                                         | 0  | 1  | 0  |
| 133922578 | Ccdc22        | coiled-coil domain containing 22                                                        | 1  | 0  | 0  |
| 262072988 | Ccdc49        | coiled-coil domain containing 49                                                        | 0  | 1  | 0  |
| 59858549  | Ccdc55        | coiled-coil domain containing 55                                                        | 1  | 0  | 0  |
| 21311867  | Ccdc56        | coiled-coil domain containing 56                                                        | 2  | 0  | 0  |
| 226874940 | Ccdc58        | coiled-coil domain containing 58 isoform 1                                              | 3  | 0  | 0  |
| 162135971 | Ccdc6         | coiled-coil domain containing 6                                                         | 1  | 0  | 0  |
| 165905619 | Ccdc86        | coiled-coil domain containing 86                                                        | 0  | 1  | 2  |
| 68448542  | Ccdc93        | coiled-coil domain containing 93 isoform c                                              | 3  | 0  | 0  |
| 13384734  | Chchd1        | coiled-coil-helix-coiled-coil-helix domain containing 1                                 | 1  | 0  | 0  |
| 21313618  | Chchd3        | coiled-coil-helix-coiled-coil-helix domain containing 3                                 | 6  | 0  | 11 |
| 19527144  | Chchd4        | coiled-coil-helix-coiled-coil-helix domain containing 4                                 | 1  | 1  | 0  |
| 28076873  | Chchd5        | coiled-coil-helix-coiled-coil-helix domain containing 5                                 | 1  | 0  | 0  |
| 267844806 | Chchd6        | coiled-coil-helix-coiled-coil-helix domain containing 6                                 | 5  | 0  | 6  |
| 298358883 | Chchd7        | coiled-coil-helix-coiled-coil-helix domain containing 7                                 | 0  | 1  | 0  |
| 6680946   | Cirbp         | cold inducible RNA binding protein                                                      | 3  | 7  | 2  |
| 240255574 | Csde1         | cold shock domain containing E1, RNA binding isoform 1                                  | 1  | 10 | 0  |
| 47059495  | Csda          | cold shock domain protein A short isoform                                               | 5  | 2  | 2  |
| 161484654 | Col4a1        | collagen, type IV, alpha 1                                                              | 0  | 0  | 1  |
| 126723423 | Csf1r         | colony stimulating factor 1 receptor                                                    | 0  | 1  | 0  |
| 110626003 | Commd2        | COMM domain containing 2                                                                | 0  | 1  | 0  |
| 112181167 | C1qbp         | complement component 1, q subcomponent binding protein                                  | 5  | 6  | 6  |
| 126518317 | C3            | complement component 3                                                                  | 5  | 0  | 0  |
| 256985208 | Cog2          | component of oligomeric golgi complex 2                                                 | 1  | 0  | 0  |
| 119392070 | Cog3          | component of oligomeric golgi complex 3                                                 | 1  | 0  | 0  |
| 160333744 | Cog6          | component of oligomeric golgi complex 6                                                 | 1  | 0  | 0  |
| 66392581  | Cog8          | component of oligomeric golgi complex 8                                                 | 1  | 0  | 0  |
| 254281178 | 1110007L15Rik | conserved edge expressed protein isoform 1                                              | 1  | 0  | 1  |
| 70909327  | Cops2         | COP9 (constitutive photomorphogenic) homolog, subunit 2                                 | 2  | 2  | 0  |
| 255760052 | Cops7a        | COP9 (constitutive photomorphogenic) homolog, subunit 7a                                | 2  | 1  | 0  |
| 6753488   | Cops3         | COP9 (constitutive photomorphogenic), subunit 3                                         | 2  | 1  | 0  |
| 6753490   | Cops4         | COP9 signalosome subunit 4                                                              | 9  | 2  | 0  |
| 7304971   | Cops5         | COP9 signalosome subunit 5                                                              | 4  | 1  | 1  |
| 33563284  | Cops6         | COP9 signalosome subunit 6                                                              | 3  | 0  | 0  |
| 114158691 | Cops8         | COP9 signalosome subunit 8                                                              | 1  | 3  | 0  |
| 25141332  | Cpne1         | copine I                                                                                | 4  | 0  | 0  |
| 25141335  | Cpne3         | copine III                                                                              | 4  | 0  | 0  |
| 23346611  | Cpne5         | copine V                                                                                | 0  | 1  | 0  |
| 76563928  | Cpne8         | copine VIII isoform 1                                                                   | 5  | 1  | 0  |
| 161484660 | Cpox          | coproporphyrinogen oxidase                                                              | 11 | 0  | 0  |
| 162135966 | Cobl          | cordon-bleu protein                                                                     | 0  | 1  | 0  |
| 282396086 | C1galt1       | core 1 synthase, glycoprotein-N-acetylgalactosamine 3-beta-galactosyltransferase, 1     | 0  | 1  | 0  |
| 161353494 | Cbfa2t2       | core-binding factor, runt domain, alpha subunit 2, translocated to, 2 homolog isoform 1 | 1  | 0  | 0  |
| 6753494   | Coro1b        | coronin, actin binding protein 1B                                                       | 2  | 13 | 1  |
| 31542413  | Coro1c        | coronin, actin binding protein 1C                                                       | 1  | 10 | 1  |
| 258645152 | Coro2a        | coronin, actin binding protein 2A                                                       | 0  | 5  | 0  |
| 75677414  | Cctn          | cortactin                                                                               | 6  | 15 | 2  |
| 31541932  | Cox15         | COX15 homolog                                                                           | 2  | 0  | 3  |
| 6754870   | Cox4nb        | COX4 neighbor                                                                           | 2  | 0  | 3  |

|           |               |                                                                                          |   |    |    |
|-----------|---------------|------------------------------------------------------------------------------------------|---|----|----|
| 68510034  | Cxadr         | coxsackievirus and adenovirus receptor isoform b                                         | 2 | 0  | 0  |
| 33695139  | 6330503K22Rik | CP110 protein                                                                            | 1 | 0  | 2  |
| 6753412   | Cfdp1         | craniofacial development protein 1                                                       | 2 | 2  | 0  |
| 6753428   | Ckmt1         | creatine kinase, mitochondrial 1, ubiquitous                                             | 3 | 10 | 0  |
| 70995311  | Crebbp        | CREB binding protein                                                                     | 0 | 5  | 0  |
| 13385288  | Crnk1         | crooked neck-like 1 protein                                                              | 0 | 1  | 13 |
| 29244038  | Crb3          | crumbs homolog 3                                                                         | 1 | 1  | 1  |
| 6753530   | Cryab         | crystallin, alpha B                                                                      | 0 | 0  | 1  |
| 19525729  | Cryl1         | crystallin, lambda 1                                                                     | 1 | 0  | 0  |
| 33859530  | Cryz          | crystallin, zeta                                                                         | 9 | 0  | 0  |
| 47059059  | Ctdspl2       | CTD (carboxy-terminal domain, RNA polymerase II, polypeptide A) small phosphatase like 2 | 0 | 0  | 4  |
| 311893328 | Ctbp1         | C-terminal binding protein 1                                                             | 3 | 7  | 0  |
| 282721029 | Ctbp2         | C-terminal binding protein 2                                                             | 2 | 11 | 0  |
| 172072613 | Ctps          | CTP synthase                                                                             | 7 | 0  | 1  |
| 270483776 | Ctps2         | CTP synthase II                                                                          | 2 | 0  | 0  |
| 254039646 | Cttbnp2nl     | CTTNBP2 N-terminal like                                                                  | 2 | 1  | 0  |
| 237757271 | Cugbp2        | CUG triplet repeat, RNA binding protein 2 isoform 5                                      | 0 | 2  | 2  |
| 38570086  | Cugbp1        | CUG triplet repeat, RNA-binding protein 1 isoform 2                                      | 0 | 5  | 5  |
| 7549752   | Cul1          | cullin 1                                                                                 | 1 | 2  | 0  |
| 170014698 | Cul2          | cullin 2                                                                                 | 2 | 0  | 1  |
| 7710014   | Cul3          | cullin 3                                                                                 | 1 | 0  | 1  |
| 167466258 | Cul4a         | cullin 4A                                                                                | 0 | 1  | 0  |
| 158711665 | Cul4b         | cullin 4B                                                                                | 3 | 1  | 3  |
| 239051082 | Cul5          | cullin 5 isoform 1                                                                       | 3 | 1  | 2  |
| 57013279  | Cul7          | cullin 7                                                                                 | 2 | 0  | 0  |
| 323462203 | Cwc22         | CWC22 spliceosome-associated protein homolog                                             | 0 | 0  | 7  |
| 124487291 | Cwf19l1       | CWF19-like 1, cell cycle control                                                         | 1 | 2  | 0  |
| 30842792  | Cwf19l2       | CWF19-like 2, cell cycle control                                                         | 0 | 0  | 1  |
| 18390325  | Cxxc1         | CXXC finger 1 (PHD domain)                                                               | 1 | 0  | 0  |
| 160333146 | Dmtf1         | cyclin D binding myb-like transcription factor 1 isoform 2                               | 1 | 0  | 0  |
| 6753314   | Ccng1         | cyclin G1                                                                                | 0 | 0  | 1  |
| 12963599  | Ccnh          | cyclin H                                                                                 | 0 | 2  | 0  |
| 157841168 | Ccnk          | cyclin K                                                                                 | 0 | 2  | 0  |
| 46592877  | Ccnl2         | cyclin L2                                                                                | 1 | 0  | 0  |
| 56550069  | Ccnt2         | cyclin T2                                                                                | 0 | 0  | 1  |
| 237858589 | Cdk10         | cyclin-dependent kinase 10 isoform 2                                                     | 1 | 0  | 0  |
| 323462189 | 2810452K22Rik | cyclin-dependent kinase 2-interacting protein                                            | 0 | 2  | 0  |
| 6753380   | Cdk4          | cyclin-dependent kinase 4                                                                | 1 | 1  | 0  |
| 6680908   | Cdk5          | cyclin-dependent kinase 5                                                                | 0 | 0  | 1  |
| 160333726 | Cdk7          | cyclin-dependent kinase 7                                                                | 0 | 1  | 0  |
| 31652272  | Cdk8          | cyclin-dependent kinase 8                                                                | 0 | 2  | 0  |
| 18699998  | Cdk9          | cyclin-dependent kinase 9                                                                | 1 | 0  | 1  |
| 31542372  | Cdkn1b        | cyclin-dependent kinase inhibitor 1B                                                     | 1 | 0  | 0  |
| 98986447  | Cdkn2a        | cyclin-dependent kinase inhibitor 2A isoform 1                                           | 0 | 1  | 1  |
| 6681071   | Cstb          | cystatin B                                                                               | 2 | 0  | 0  |
| 6681069   | Csrp1         | cysteine and glycine-rich protein 1                                                      | 2 | 8  | 0  |
| 160707987 | Csrp2         | cysteine and glycine-rich protein 2                                                      | 0 | 4  | 0  |
| 262231838 | Csrp2bp       | cysteine and glycine-rich protein 2 binding protein                                      | 0 | 1  | 0  |
| 13385324  | Chordc1       | cysteine and histidine-rich domain (CHORD)-containing, zinc-binding protein 1            | 2 | 0  | 1  |
| 71895029  | Crim1         | cysteine rich transmembrane BMP regulator 1 (chordin like)                               | 1 | 0  | 0  |
| 6681015   | Crip1         | cysteine-rich protein 1 (intestinal)                                                     | 1 | 0  | 0  |

|           |               |                                                                     |    |    |    |
|-----------|---------------|---------------------------------------------------------------------|----|----|----|
| 19527148  | Cred1         | cysteine-rich with EGF-like domains 1                               | 1  | 0  | 0  |
| 21313278  | Cred2         | cysteine-rich with EGF-like domains 2                               | 5  | 0  | 0  |
| 148747198 | Cars          | cysteinyl-tRNA synthetase                                           | 0  | 0  | 1  |
| 270483872 | Cdadc1        | cytidine and dCMP deaminase domain containing 1                     | 0  | 1  | 0  |
| 247269309 | Cmas          | cytidine monophospho-N-acetylneuraminic acid synthetase             | 1  | 16 | 0  |
| 13385268  | Cyb5          | cytochrome b-5                                                      | 3  | 0  | 0  |
| 21312524  | Cyb5r1        | cytochrome b5 reductase 1                                           | 6  | 0  | 1  |
| 19745150  | Cyb5r3        | cytochrome b5 reductase 3                                           | 19 | 4  | 12 |
| 31542438  | Cyb5b         | cytochrome b5 type B precursor                                      | 4  | 2  | 4  |
| 6753498   | Cox4i1        | cytochrome c oxidase subunit IV isoform 1                           | 8  | 3  | 10 |
| 13385090  | Cox6b1        | cytochrome c oxidase subunit VIb polypeptide 1                      | 6  | 2  | 5  |
| 226958512 | Cox7a2l       | cytochrome c oxidase subunit VIIa polypeptide 2-like isoform 2      | 2  | 0  | 2  |
| 62945234  | Cox17         | cytochrome c oxidase subunit XVII assembly protein homolog          | 2  | 0  | 0  |
| 112181182 | Cox5a         | cytochrome c oxidase, subunit Va                                    | 8  | 5  | 9  |
| 6680988   | Cox6a1        | cytochrome c oxidase, subunit VI a, polypeptide 1                   | 2  | 0  | 3  |
| 16716343  | Cox6c         | cytochrome c oxidase, subunit VIc                                   | 4  | 1  | 3  |
| 31981830  | Cox7a2        | cytochrome c oxidase, subunit VIIa 2                                | 2  | 2  | 2  |
| 6680991   | Cox7c         | cytochrome c oxidase, subunit VIIC                                  | 2  | 0  | 1  |
| 6681095   | Cycs          | cytochrome c, somatic                                               | 3  | 13 | 0  |
| 13385006  | Cyc1          | cytochrome c-1                                                      | 8  | 3  | 8  |
| 6679421   | Por           | cytochrome P450 reductase                                           | 30 | 0  | 4  |
| 6753568   | Cyp1b1        | cytochrome P450, family 1, subfamily b, polypeptide 1               | 0  | 1  | 0  |
| 74271886  | Cyp20a1       | cytochrome P450, family 20, subfamily A, polypeptide 1              | 0  | 0  | 1  |
| 71061451  | Cyp51         | cytochrome P450, family 51, subfamily A, polypeptide 1              | 3  | 0  | 0  |
| 19527376  | Ciapin1       | cytokine induced apoptosis inhibitor 1                              | 2  | 0  | 0  |
| 13384730  | Sarnp         | cytokine induced protein 29 kDa                                     | 0  | 8  | 3  |
| 119392074 | 3930401K13Rik | cytokine-like nuclear factor n-pac isoform 1                        | 0  | 18 | 8  |
| 162329564 | Caprin1       | cytoplasmic activation/proliferation-associated protein 1 isoform c | 9  | 5  | 0  |
| 134288917 | Dync1h1       | cytoplasmic dynein 1 heavy chain 1                                  | 16 | 96 | 9  |
| 258547119 | Cyflp1        | cytoplasmic FMR1 interacting protein 1                              | 2  | 16 | 0  |
| 269315836 | Ckap2         | cytoskeleton associated protein 2                                   | 1  | 0  | 0  |
| 31712008  | Ckap2l        | cytoskeleton associated protein 2-like                              | 0  | 1  | 0  |
| 260166721 | Ckap5         | cytoskeleton associated protein 5                                   | 0  | 14 | 0  |
| 62526118  | Ckap4         | cytoskeleton-associated protein 4                                   | 1  | 0  | 0  |
| 6679369   | Pla2g4a       | cytosolic phospholipase A2, group IVA                               | 0  | 1  | 0  |
| 224922837 | Cytsa         | cytospin A isoform b                                                | 0  | 1  | 0  |
| 71979930  | Cytsb         | cytospin B                                                          | 0  | 1  | 5  |
| 255760011 | Tia1          | cytotoxic granule-associated RNA binding protein 1                  | 0  | 3  | 0  |
| 170650717 | Dbp           | D site albumin promoter binding protein                             | 1  | 0  | 0  |
| 37574121  | Scyl2         | D10Ert802e protein                                                  | 0  | 0  | 1  |
| 29126213  | D19Bwg1357e   | D19Bwg1357e protein                                                 | 0  | 0  | 13 |
| 6755314   | Dpf2          | D4, zinc and double PHD fingers family 2                            | 0  | 10 | 3  |
| 42734496  | Fam3c         | D6Wsu176e protein                                                   | 9  | 0  | 5  |
| 7657011   | Ddb1          | damage specific DNA binding protein 1                               | 13 | 15 | 12 |
| 29150251  | Ddb2          | damage specific DNA binding protein 2                               | 0  | 3  | 0  |
| 169790823 | Dazap1        | DAZ associated protein 1 isoform a                                  | 1  | 9  | 2  |
| 13384930  | Ostc          | DC2 protein                                                         | 2  | 0  | 1  |
| 238859575 | Dctd          | dCMP deaminase                                                      | 1  | 0  | 0  |
| 56090231  | Dcaf5         | DDB1 and CUL4 associated factor 5                                   | 2  | 0  | 0  |
| 6753618   | Ddt           | D-dopachrome tautomerase                                            | 6  | 0  | 0  |

|           |         |                                                                 |    |    |    |
|-----------|---------|-----------------------------------------------------------------|----|----|----|
| 299890868 | Ddx19b  | DDX19 homolog                                                   | 0  | 2  | 0  |
| 19527256  | Ddx1    | DEAD (Asp-Glu-Ala-Asp) box polypeptide 1                        | 8  | 19 | 5  |
| 189491668 | Ddx10   | DEAD (Asp-Glu-Ala-Asp) box polypeptide 10                       | 0  | 0  | 3  |
| 31981163  | Ddx18   | DEAD (Asp-Glu-Ala-Asp) box polypeptide 18                       | 0  | 17 | 13 |
| 148540073 | Ddx20   | DEAD (Asp-Glu-Ala-Asp) box polypeptide 20                       | 0  | 0  | 1  |
| 72384374  | Ddx21   | DEAD (Asp-Glu-Ala-Asp) box polypeptide 21                       | 0  | 39 | 22 |
| 34328253  | Ddx24   | DEAD (Asp-Glu-Ala-Asp) box polypeptide 24 isoform 2             | 0  | 0  | 4  |
| 124249330 | Ddx27   | DEAD (Asp-Glu-Ala-Asp) box polypeptide 27                       | 0  | 0  | 6  |
| 38372907  | Ddx39   | DEAD (Asp-Glu-Ala-Asp) box polypeptide 39                       | 13 | 22 | 16 |
| 270047502 | Ddx41   | DEAD (Asp-Glu-Ala-Asp) box polypeptide 41                       | 0  | 1  | 2  |
| 157838001 | Ddx42   | DEAD (Asp-Glu-Ala-Asp) box polypeptide 42                       | 1  | 15 | 0  |
| 27229058  | Ddx47   | DEAD (Asp-Glu-Ala-Asp) box polypeptide 47                       | 1  | 12 | 2  |
| 67972435  | Ddx49   | DEAD (Asp-Glu-Ala-Asp) box polypeptide 49                       | 1  | 4  | 0  |
| 83816893  | Ddx5    | DEAD (Asp-Glu-Ala-Asp) box polypeptide 5                        | 19 | 24 | 24 |
| 16716475  | Ddx50   | DEAD (Asp-Glu-Ala-Asp) box polypeptide 50                       | 0  | 1  | 7  |
| 40538825  | Ddx51   | DEAD (Asp-Glu-Ala-Asp) box polypeptide 51                       | 0  | 2  | 2  |
| 256985213 | Ddx52   | DEAD (Asp-Glu-Ala-Asp) box polypeptide 52                       | 0  | 0  | 1  |
| 28076989  | Ddx54   | DEAD (Asp-Glu-Ala-Asp) box polypeptide 54                       | 0  | 0  | 5  |
| 161016793 | Ddx6    | DEAD (Asp-Glu-Ala-Asp) box polypeptide 6                        | 7  | 8  | 2  |
| 93587673  | Ddx17   | DEAD box polypeptide 17 isoform 1                               | 5  | 17 | 7  |
| 160420299 | Ddx46   | DEAD box polypeptide 46                                         | 1  | 3  | 0  |
| 6753620   | Ddx3x   | DEAD/H (Asp-Glu-Ala-Asp/His) box polypeptide 3, X-linked        | 2  | 1  | 1  |
| 110835726 | Dhx15   | DEAH (Asp-Glu-Ala-His) box polypeptide 15 isoform 2             | 3  | 16 | 20 |
| 226246667 | Dhx16   | DEAH (Asp-Glu-Ala-His) box polypeptide 16                       | 0  | 0  | 1  |
| 46560585  | Dhx33   | DEAH (Asp-Glu-Ala-His) box polypeptide 33                       | 1  | 1  | 0  |
| 240848573 | Dhx36   | DEAH (Asp-Glu-Ala-His) box polypeptide 36                       | 0  | 0  | 2  |
| 30410010  | Dhx38   | DEAH (Asp-Glu-Ala-His) box polypeptide 38                       | 0  | 3  | 0  |
| 144926009 | Dhx40   | DEAH (Asp-Glu-Ala-His) box polypeptide 40                       | 0  | 1  | 0  |
| 56699440  | Dhx8    | DEAH (Asp-Glu-Ala-His) box polypeptide 8                        | 0  | 1  | 2  |
| 150456419 | Dhx9    | DEAH (Asp-Glu-Ala-His) box polypeptide 9                        | 2  | 39 | 53 |
| 76096375  | Dido1   | death inducer-obliterator 1 isoform 3                           | 0  | 9  | 0  |
| 256985205 | Dap3    | death-associated protein 3                                      | 2  | 1  | 1  |
| 189491664 | Dcp2    | decapping enzyme hDcp2                                          | 0  | 0  | 1  |
| 88853584  | Dock1   | dedicator of cytokinesis 1                                      | 0  | 5  | 1  |
| 124358946 | Dock5   | dedicator of cytokinesis 5                                      | 1  | 1  | 0  |
| 78191789  | Dock7   | dedicator of cytokinesis 7                                      | 1  | 2  | 1  |
| 62241030  | Dock8   | dedicator of cytokinesis 8                                      | 0  | 2  | 2  |
| 190194401 | Dock9   | dedicator of cytokinesis 9 isoform 2                            | 1  | 3  | 0  |
| 164518942 | Dad1    | defender against cell death 1                                   | 2  | 1  | 1  |
| 6681175   | Degs1   | degenerative spermatocyte homolog 1                             | 1  | 0  | 0  |
| 27754093  | Dhdds   | dehydrodolichyl diphosphate synthase                            | 1  | 0  | 1  |
| 31980844  | Dhrs1   | dehydrogenase/reductase (SDR family) member 1                   | 12 | 0  | 1  |
| 117647267 | Dhrs13  | dehydrogenase/reductase (SDR family) member 13                  | 0  | 0  | 1  |
| 21703854  | Dhrs7b  | dehydrogenase/reductase (SDR family) member 7B                  | 2  | 0  | 4  |
| 253795498 | Dek     | DEK oncogene                                                    | 0  | 15 | 2  |
| 51371928  | Nipbl   | delangin isoform A                                              | 0  | 12 | 14 |
| 33942059  | Ppp2r5d | delta isoform of regulatory subunit B56, protein phosphatase 2A | 3  | 0  | 0  |
| 22164784  | Fads1   | delta-5 desaturase                                              | 3  | 1  | 2  |
| 34328485  | Alad    | delta-aminolevulinic acid dehydratase                           | 7  | 2  | 0  |
| 133930784 | Dtx3l   | deltex 3-like                                                   | 1  | 0  | 1  |
| 58037277  | Dennd2d | DENN/MADD domain containing 2D isoform 1                        | 0  | 3  | 0  |
| 124486610 | Dennd4c | DENN/MADD domain containing 4C                                  | 0  | 1  | 0  |

|           |          |                                                                                  |    |    |     |
|-----------|----------|----------------------------------------------------------------------------------|----|----|-----|
| 13386092  | Denr     | density-regulated protein                                                        | 0  | 3  | 0   |
| 34328110  | Atn1     | dentatorubral pallidoluysian atrophy                                             | 1  | 0  | 0   |
| 247269607 | Dguok    | deoxyguanosine kinase isoform 1                                                  | 1  | 0  | 0   |
| 6753654   | Dnase2a  | deoxyribonuclease II alpha                                                       | 4  | 0  | 0   |
| 157785665 | Dtymk    | deoxythymidylate kinase isoform 1                                                | 3  | 0  | 0   |
| 227497222 | Dut      | deoxyuridine triphosphatase isoform 2                                            | 4  | 4  | 0   |
| 31542025  | Depdc1a  | DEP domain containing 1a                                                         | 1  | 0  | 0   |
| 70909320  | Depdc5   | DEP domain containing 5 isoform 1                                                | 0  | 0  | 1   |
| 27754054  | Dcakd    | dephospho-CoA kinase domain containing                                           | 8  | 3  | 8   |
| 13195638  | Der1     | Der1-like domain family, member 1                                                | 1  | 0  | 1   |
| 15808990  | Der12    | Der1-like domain family, member 2                                                | 1  | 0  | 0   |
| 7305007   | Dsc2     | desmocollin 2                                                                    | 0  | 0  | 2   |
| 161016843 | Dsg2     | desmoglein 2                                                                     | 0  | 0  | 23  |
| 190194418 | Dsp      | desmoplakin                                                                      | 7  | 2  | 103 |
| 9790219   | Dstn     | destrin                                                                          | 12 | 10 | 5   |
| 6681225   | Drg1     | developmentally regulated GTP binding protein 1                                  | 3  | 7  | 0   |
| 10946678  | Drg2     | developmentally regulated GTP binding protein 2                                  | 3  | 0  | 0   |
| 85719324  | Zdhhc20  | DHHC-containing protein 20                                                       | 0  | 1  | 0   |
| 6753632   | Dgat1    | diacylglycerol O-acyltransferase 1                                               | 0  | 1  | 0   |
| 6677849   | Sat1     | diamine N-acetyltransferase 1                                                    | 1  | 0  | 0   |
| 6681183   | Diap1    | diaphanous homolog 1                                                             | 7  | 0  | 1   |
| 9789931   | Diap3    | diaphanous homolog 3                                                             | 1  | 0  | 0   |
| 83921595  | Dbi      | diazepam binding inhibitor isoform 2                                             | 2  | 0  | 0   |
| 146134409 | Dcxr     | dicarbonyl/L-xylulose reductase                                                  | 1  | 0  | 0   |
| 117168271 | Dicer1   | dicer1                                                                           | 1  | 0  | 0   |
| 56790942  | AA408296 | digestive-organ expansion factor homolog                                         | 0  | 1  | 0   |
| 7106289   | Dhfr     | dihydrofolate reductase                                                          | 1  | 0  | 4   |
| 170172520 | Dbt      | dihydrolipoamide branched chain transacylase E2                                  | 6  | 16 | 4   |
| 31982856  | Dld      | dihydrolipoamide dehydrogenase                                                   | 17 | 3  | 0   |
| 257796245 | Dlat     | dihydrolipoamide S-acetyltransferase                                             | 17 | 4  | 4   |
| 21313536  | Dlst     | dihydrolipoamide S-succinyltransferase (E2 component of 2-oxo-glutarate complex) | 10 | 3  | 2   |
| 40254595  | Dpysl2   | dihydropyrimidinase-like 2                                                       | 23 | 1  | 0   |
| 38371755  | Ddah1    | dimethylarginine dimethylaminohydrolase 1                                        | 1  | 0  | 0   |
| 299522791 | Ddah2    | dimethylarginine dimethylaminohydrolase 2                                        | 4  | 1  | 0   |
| 226823258 | Dip2b    | DIP2 disco-interacting protein 2 homolog B isoform 2                             | 0  | 1  | 1   |
| 244791124 | Dpp3     | dipeptidyl peptidase III                                                         | 16 | 0  | 0   |
| 31981425  | Dpp7     | dipeptidylpeptidase 7                                                            | 7  | 0  | 0   |
| 40254642  | Dlg1     | discs large homolog 1                                                            | 16 | 21 | 14  |
| 254588085 | Dlg5     | discs, large homolog 5 (Drosophila)                                              | 0  | 1  | 0   |
| 62198210  | Cuta     | divalent cation tolerant protein CUTA isoform 2                                  | 1  | 0  | 0   |
| 124487031 | Dmx1     | Dmx-like 1                                                                       | 0  | 3  | 0   |
| 114145469 | Dclre1a  | DNA cross-link repair 1A, PSO2 homolog                                           | 1  | 0  | 1   |
| 226958589 | Polr2b   | DNA directed RNA polymerase II polypeptide B                                     | 0  | 5  | 22  |
| 58037181  | Polr2f   | DNA directed RNA polymerase II polypeptide F                                     | 0  | 2  | 1   |
| 70608144  | Dffa     | DNA fragmentation factor, alpha subunit isoform a                                | 0  | 1  | 0   |
| 313151236 | Lig1     | DNA ligase I                                                                     | 1  | 8  | 0   |
| 327180734 | Dnmt1    | DNA methyltransferase (cytosine-5) 1                                             | 1  | 69 | 3   |
| 24371231  | Dnmt3a   | DNA methyltransferase 3A isoform 1                                               | 0  | 0  | 8   |
| 30519969  | Poldip3  | DNA polymerase delta interacting protein 3                                       | 0  | 12 | 0   |
| 153792337 | Rev3l    | DNA polymerase zeta                                                              | 0  | 1  | 1   |
| 6679461   | Prim2    | DNA primase, p58 subunit                                                         | 1  | 0  | 0   |
| 112734855 | Top1     | DNA topoisomerase I                                                              | 0  | 33 | 7   |
| 6679409   | Pola1    | DNA-directed DNA polymerase alpha 1                                              | 3  | 0  | 0   |



|           |          |                                                                  |    |    |    |
|-----------|----------|------------------------------------------------------------------|----|----|----|
| 255708463 | Pola2    | DNA-directed DNA polymerase alpha 2                              | 1  | 0  | 0  |
| 254587977 | Pold1    | DNA-directed DNA polymerase delta 1                              | 1  | 0  | 0  |
| 226423863 | Pold2    | DNA-directed DNA polymerase delta 2                              | 0  | 2  | 0  |
| 195947387 | Pole     | DNA-directed DNA polymerase epsilon                              | 1  | 0  | 0  |
| 33468927  | Pole2    | DNA-directed DNA polymerase epsilon 2                            | 1  | 0  | 0  |
| 31981174  | Pole3    | DNA-directed DNA polymerase epsilon 3                            | 0  | 3  | 0  |
| 13385366  | Pole4    | DNA-directed DNA polymerase epsilon 4                            | 0  | 1  | 0  |
| 6677795   | Polr2a   | DNA-directed RNA polymerase II A                                 | 0  | 3  | 17 |
| 6680297   | Dnaja1   | DnaJ (Hsp40) homolog, subfamily A, member 1                      | 2  | 1  | 3  |
| 9789937   | Dnaja2   | DnaJ (Hsp40) homolog, subfamily A, member 2                      | 8  | 4  | 5  |
| 205361112 | Dnaja3   | DnaJ (Hsp40) homolog, subfamily A, member 3 isoform 1            | 5  | 4  | 6  |
| 9055242   | Dnajb1   | DnaJ (Hsp40) homolog, subfamily B, member 1                      | 1  | 4  | 0  |
| 299890782 | Dnajb11  | DnaJ (Hsp40) homolog, subfamily B, member 11                     | 5  | 4  | 0  |
| 165377271 | Dnajb4   | DnaJ (Hsp40) homolog, subfamily B, member 4                      | 0  | 2  | 0  |
| 188219644 | Dnajb6   | DnaJ (Hsp40) homolog, subfamily B, member 6 isoform a            | 0  | 0  | 3  |
| 119508443 | Dnajc10  | DnaJ (Hsp40) homolog, subfamily C, member 10                     | 4  | 4  | 0  |
| 164565394 | Dnajc11  | DnaJ (Hsp40) homolog, subfamily C, member 11                     | 0  | 0  | 3  |
| 254540074 | Dnajc17  | DnaJ (Hsp40) homolog, subfamily C, member 17                     | 0  | 3  | 0  |
| 6677659   | Dnajc2   | DnaJ (Hsp40) homolog, subfamily C, member 2                      | 0  | 1  | 0  |
| 7949027   | Dnajc5   | DnaJ (Hsp40) homolog, subfamily C, member 5                      | 1  | 0  | 0  |
| 31980994  | Dnajc7   | DnaJ (Hsp40) homolog, subfamily C, member 7                      | 1  | 0  | 0  |
| 157951606 | Dnajc8   | DnaJ (Hsp40) homolog, subfamily C, member 8                      | 1  | 7  | 0  |
| 23956266  | Dnajc9   | DnaJ homolog, subfamily C, member 9                              | 1  | 2  | 9  |
| 12963557  | Dmap1    | DNMT1 associated protein-1                                       | 1  | 6  | 2  |
| 31981810  | Dci      | dodecenoyl-Coenzyme A delta isomerase                            | 12 | 2  | 2  |
| 46195798  | Ddost    | dolichyl-di-phosphooligosaccharide-protein glycotransferase      | 13 | 1  | 7  |
| 6753670   | Dpm1     | dolichyl-phosphate mannosyltransferase 1                         | 10 | 0  | 1  |
| 226437674 | Utp20    | down-regulated in metastasis                                     | 1  | 61 | 7  |
| 27754097  | Dr1      | down-regulator of transcription 1                                | 1  | 3  | 0  |
| 21313424  | Drap1    | Dr1 associated protein 1 (negative cofactor 2 alpha)             | 1  | 2  | 0  |
| 226423873 | Dbrn1    | drebrin-like isoform 2                                           | 3  | 8  | 0  |
| 13384676  | Dtd1     | D-tyrosyl-tRNA deacylase 1                                       | 0  | 1  | 0  |
| 145966803 | Dusp5    | dual specificity phosphatase 5                                   | 0  | 1  | 0  |
| 67846105  | Dyrk2    | dual-specificity tyrosine-(Y)-phosphorylation regulated kinase 2 | 1  | 0  | 1  |
| 23956160  | Dullard  | Dullard homolog                                                  | 0  | 0  | 1  |
| 311893360 | Dctn1    | dynactin 1                                                       | 13 | 12 | 1  |
| 299522842 | Dctn2    | dynactin 2                                                       | 8  | 5  | 0  |
| 227116275 | Dctn3    | dynactin 3 isoform A                                             | 0  | 6  | 0  |
| 13385798  | Dctn4    | dynactin 4                                                       | 0  | 1  | 1  |
| 188219518 | Dctn5    | dynactin 5                                                       | 0  | 1  | 0  |
| 6756009   | Dctn6    | dynactin 6                                                       | 1  | 0  | 0  |
| 71061458  | Dnm1l    | dynamamin 1-like isoform a                                       | 11 | 0  | 1  |
| 87299637  | Dnm2     | dynamamin 2                                                      | 2  | 1  | 1  |
| 311893387 | Dync1i2  | dynein cytoplasmic 1 intermediate chain 2                        | 3  | 6  | 0  |
| 22122795  | Dync1li1 | dynein cytoplasmic 1 light intermediate chain 1                  | 0  | 6  | 1  |
| 72534792  | Dync2h1  | dynein cytoplasmic 2 heavy chain 1                               | 0  | 0  | 1  |
| 213688406 | Dynll1   | dynein light chain LC8-type 1                                    | 2  | 4  | 4  |
| 281182477 | Dynll2   | dynein light chain LC8-type 2                                    | 1  | 1  | 0  |
| 254540041 | Dynlrb1  | dynein light chain roadblock-type 1                              | 0  | 2  | 0  |
| 6678265   | Dynlt1   | dynein light chain Tctex-type 1                                  | 0  | 5  | 1  |

|           |               |                                                                            |    |    |    |
|-----------|---------------|----------------------------------------------------------------------------|----|----|----|
| 225543181 | Dync1li2      | dynein, cytoplasmic 1 light intermediate chain 2                           | 1  | 5  | 1  |
| 118026931 | Dysf          | dysferlin isoform 1                                                        | 2  | 0  | 0  |
| 91064867  | Dkc1          | dyskerin                                                                   | 0  | 18 | 7  |
| 111154082 | Dst           | dystonin isoform b                                                         | 0  | 7  | 2  |
| 15208633  | Dtnbp1        | dystrobrevin binding protein 1                                             | 1  | 0  | 1  |
| 247269964 | Dtnb          | dystrobrevin, beta isoform b                                               | 8  | 1  | 2  |
| 33859532  | Dag1          | dystroglycan 1                                                             | 3  | 0  | 0  |
| 6681203   | Dmd           | dystrophin, muscular dystrophy                                             | 1  | 0  | 1  |
| 30023855  | Eny2          | e(y)2 protein                                                              | 0  | 1  | 1  |
| 94421034  | Ep300         | E1A binding protein p300                                                   | 0  | 2  | 0  |
| 190194425 | Ep400         | E1A binding protein p400 isoform 2                                         | 0  | 5  | 0  |
| 257153394 | Ets2          | E26 avian leukemia oncogene 2, 3&apos; domain                              | 0  | 1  | 0  |
| 31982405  | E2f5          | E2F transcription factor 5                                                 | 1  | 0  | 0  |
| 6679627   | Elf1          | E74-like factor 1                                                          | 0  | 1  | 0  |
| 253683411 | Elf3          | E74-like factor 3 isoform 2                                                | 1  | 1  | 1  |
| 15809002  | Snf8          | EAP30 subunit of ELL complex                                               | 0  | 0  | 1  |
| 50053824  | Eea1          | early endosome antigen 1                                                   | 18 | 0  | 0  |
| 6681285   | Egr1          | early growth response 1                                                    | 1  | 0  | 0  |
| 21312728  | Ebna1bp2      | EBNA1 binding protein 2                                                    | 0  | 0  | 2  |
| 21450111  | Eml3          | echinoderm microtubule associated protein like 3                           | 0  | 1  | 0  |
| 167234437 | Eml4          | echinoderm microtubule associated protein like 4 3                         | 0  | 1  | 0  |
| 124487111 | Eml5          | echinoderm microtubule associated protein like 5                           | 1  | 0  | 1  |
| 111185905 | Evi5          | ecotropic viral integration site 5                                         | 0  | 0  | 1  |
| 71061462  | Entpd5        | ectonucleoside triphosphate diphosphohydrolase 5 isoform a                 | 2  | 0  | 0  |
| 84872231  | Enpp4         | ectonucleotide pyrophosphatase/phosphodiesterase 4                         | 1  | 0  | 0  |
| 13386360  | Efh1          | EF hand domain containing 1                                                | 0  | 0  | 1  |
| 31981086  | Efh2          | EF hand domain containing 2                                                | 1  | 1  | 3  |
| 7106303   | Ehd1          | EH-domain containing 1                                                     | 6  | 0  | 1  |
| 31981592  | Ehd4          | EH-domain containing 4                                                     | 15 | 7  | 3  |
| 31542602  | Elavl1        | ELAV (embryonic lethal, abnormal vision, Drosophila)-like 1 (Hu antigen R) | 3  | 13 | 14 |
| 227500281 | Etf1a         | electron transferring flavoprotein, alpha polypeptide                      | 15 | 9  | 10 |
| 38142460  | Etf1b         | electron transferring flavoprotein, beta polypeptide                       | 13 | 3  | 9  |
| 254588014 | Etf1dh        | electron-transferring-flavoprotein dehydrogenase                           | 14 | 0  | 0  |
| 255003740 | 1200014J11Rik | ELG protein                                                                | 0  | 2  | 4  |
| 153792362 | Elk4          | ELK4, member of ETS oncogene family                                        | 0  | 1  | 0  |
| 158508674 | Eftud2        | elongation factor Tu GTP binding domain containing 2 isoform b             | 9  | 41 | 32 |
| 148540000 | Elovl7        | elongation of very long chain fatty acids-like 7                           | 1  | 0  | 0  |
| 33469023  | Elp3          | elongation protein 3 homolog                                               | 1  | 0  | 0  |
| 11230770  | Eed           | embryonic ectoderm development                                             | 0  | 5  | 0  |
| 6679641   | Emd           | emerin                                                                     | 9  | 0  | 5  |
| 7305109   | Emg1          | EMG1 nucleolar protein homolog                                             | 0  | 9  | 6  |
| 19526463  | Erp29         | endoplasmic reticulum protein ERp29 precursor                              | 8  | 0  | 0  |
| 13385678  | Ergic1        | endoplasmic reticulum-golgi intermediate compartment (ERGIC) 1             | 8  | 0  | 2  |
| 10946942  | Edf1          | endothelial differentiation-related factor 1                               | 1  | 2  | 0  |
| 13385388  | Med28         | endothelial-derived gene 1                                                 | 0  | 1  | 0  |
| 255683297 | Elmo3         | engulfment and cell motility 3, ced-12 homolog                             | 0  | 4  | 1  |
| 27532963  | Epc1          | enhancer of polycomb homolog 1 isoform 1                                   | 0  | 1  | 0  |
| 157042787 | Epc2          | enhancer of polycomb homolog 2                                             | 1  | 0  | 0  |
| 6679685   | Erh           | enhancer of rudimentary homolog                                            | 3  | 3  | 3  |
| 226442807 | Ezh2          | enhancer of zeste 2 isoform 1                                              | 0  | 1  | 0  |

|           |           |                                                                          |    |    |    |
|-----------|-----------|--------------------------------------------------------------------------|----|----|----|
| 6679719   | Ezh1      | enhancer of zeste homolog 1                                              | 1  | 0  | 0  |
| 294979218 | Etl4      | enhancer trap locus 4                                                    | 0  | 0  | 6  |
| 158853992 | Eno1      | enolase 1, alpha non-neuron                                              | 25 | 2  | 12 |
| 7305027   | Eno2      | enolase 2, gamma neuronal                                                | 1  | 0  | 0  |
| 7949037   | Ech1      | enoyl coenzyme A hydratase 1, peroxisomal                                | 11 | 3  | 0  |
| 111185907 | Evpl      | envoplakin                                                               | 4  | 4  | 5  |
| 47777351  | Ephb2     | Eph receptor B2                                                          | 0  | 0  | 1  |
| 6753724   | Efna5     | ephrin A5 isoform 1                                                      | 0  | 0  | 1  |
| 31542597  | Efnb2     | ephrin B2                                                                | 0  | 0  | 1  |
| 32484983  | Epha2     | ephrin receptor EphA2                                                    | 1  | 0  | 0  |
| 46560582  | Egfr      | epidermal growth factor receptor isoform 1                               | 4  | 0  | 0  |
| 170784834 | Eps15l1   | epidermal growth factor receptor pathway substrate 15, related isoform a | 0  | 1  | 0  |
| 21040233  | Eps8l2    | epidermal growth factor receptor pathway substrate 8-like protein 2      | 3  | 0  | 5  |
| 166706895 | Tox4      | epidermal Langerhans cell protein LCP1                                   | 0  | 6  | 0  |
| 12963667  | Npc2      | epididymal secretory protein E1                                          | 4  | 0  | 0  |
| 37537522  | Eppk1     | epiplakin 1                                                              | 7  | 0  | 5  |
| 112293275 | Epcam     | epithelial cell adhesion molecule                                        | 6  | 0  | 1  |
| 6753748   | Emp1      | epithelial membrane protein 1                                            | 0  | 0  | 1  |
| 28849887  | Esrp2     | epithelial splicing regulatory protein 2                                 | 1  | 2  | 2  |
| 30424918  | Epm2aip1  | EPM2A (laforin) interacting protein 1                                    | 0  | 1  | 0  |
| 6753762   | Ephx1     | epoxide hydrolase 1, microsomal                                          | 14 | 0  | 0  |
| 10946972  | Cope      | epsilon subunit of coatomer protein complex                              | 5  | 0  | 2  |
| 30794400  | Epn3      | epsin 3                                                                  | 1  | 3  | 6  |
| 256355019 | Erlin1    | ER lipid raft associated 1                                               | 2  | 0  | 1  |
| 23956396  | Erlin2    | ER lipid raft associated 2                                               | 18 | 0  | 6  |
| 54607114  | Erb2ip    | Erb2 interacting protein isoform 2                                       | 0  | 0  | 2  |
| 6755100   | Pa2g4     | ErbB3-binding protein 1                                                  | 13 | 15 | 0  |
| 13384938  | Ergic3    | ERGIC and golgi 3                                                        | 3  | 0  | 0  |
| 7657067   | Ero1l     | ERO1-like                                                                | 8  | 0  | 0  |
| 190684669 | Epb4.1    | erythrocyte protein band 4.1 isoform 3                                   | 3  | 2  | 0  |
| 54873604  | Epb4.111  | erythrocyte protein band 4.1-like 1 isoform a                            | 8  | 1  | 0  |
| 312922373 | Epb4.112  | erythrocyte protein band 4.1-like 2                                      | 8  | 0  | 0  |
| 7305031   | Epb4.113  | erythrocyte protein band 4.1-like 3                                      | 0  | 0  | 1  |
| 87042272  | Epb4.114a | erythrocyte protein band 4.1-like 4a                                     | 0  | 0  | 1  |
| 169234799 | Epb4.114b | erythrocyte protein band 4.1-like 4b                                     | 0  | 0  | 1  |
| 164663872 | Epb4.115  | erythrocyte protein band 4.1-like 5 isoform 1                            | 4  | 2  | 6  |
| 20070420  | D10Jhu81e | es1 protein                                                              | 5  | 0  | 1  |
| 13937355  | Esd       | esterase D/formylglutathione hydrolase                                   | 4  | 0  | 0  |
| 157951743 | H2-Ke6    | estradiol 17 beta-dehydrogenase 8                                        | 7  | 9  | 1  |
| 16716597  | Hsd17b11  | estradiol 17-beta-dehydrogenase 11                                       | 7  | 1  | 3  |
| 112293262 | Esrra     | estrogen related receptor, alpha                                         | 0  | 4  | 1  |
| 226958367 | Esrrb     | estrogen-related receptor beta isoform 1                                 | 0  | 2  | 1  |
| 257153368 | Etaa1     | ETAA16 protein                                                           | 1  | 1  | 0  |
| 12963539  | Ethe1     | ETHE1 protein                                                            | 11 | 1  | 0  |
| 6681287   | Ehf       | ets homologous factor                                                    | 0  | 2  | 0  |
| 84370337  | Etv6      | ets variant 6                                                            | 0  | 1  | 0  |
| 157951633 | Ehmt1     | euchromatic histone methyltransferase 1 isoform 4                        | 0  | 0  | 4  |
| 22219432  | Ehmt2     | euchromatic histone-lysine N-methyltransferase 2 isoform G9a long        | 0  | 4  | 4  |
| 12746442  | Eefsec    | eukaryotic elongation factor, selenocysteine-tRNA-specific               | 2  | 7  | 0  |
| 6681275   | Eef2k     | eukaryotic elongation factor-2 kinase                                    | 0  | 0  | 1  |

|           |         |                                                                                                 |    |    |    |
|-----------|---------|-------------------------------------------------------------------------------------------------|----|----|----|
| 126032329 | Eef1a1  | eukaryotic translation elongation factor 1 alpha 1                                              | 18 | 21 | 15 |
| 31980922  | Eef1b2  | eukaryotic translation elongation factor 1 beta 2                                               | 2  | 7  | 3  |
| 54287684  | Eef1d   | eukaryotic translation elongation factor 1 delta isoform a                                      | 8  | 10 | 2  |
| 13384756  | Eef1e1  | eukaryotic translation elongation factor 1 epsilon 1                                            | 0  | 1  | 0  |
| 110625979 | Eef1g   | eukaryotic translation elongation factor 1 gamma                                                | 11 | 17 | 5  |
| 33859482  | Eef2    | eukaryotic translation elongation factor 2                                                      | 44 | 28 | 18 |
| 22165347  | Eif1    | eukaryotic translation initiation factor 1                                                      | 0  | 2  | 0  |
| 158631225 | Eif1a   | eukaryotic translation initiation factor 1A                                                     | 0  | 2  | 0  |
| 31541824  | Eif1ay  | eukaryotic translation initiation factor 1A, Y-linked                                           | 1  | 8  | 0  |
| 21312159  | Eif1b   | eukaryotic translation initiation factor 1B                                                     | 1  | 6  | 0  |
| 13385624  | Eif2s1  | eukaryotic translation initiation factor 2, subunit 1 alpha                                     | 16 | 14 | 0  |
| 14149756  | Eif2s2  | eukaryotic translation initiation factor 2, subunit 2 (beta)                                    | 6  | 11 | 0  |
| 6753738   | Eif2s3x | eukaryotic translation initiation factor 2, subunit 3, structural gene X-linked                 | 2  | 3  | 0  |
| 54020676  | Eif2a   | eukaryotic translation initiation factor 2A                                                     | 10 | 6  | 0  |
| 6755160   | Eif2ak2 | eukaryotic translation initiation factor 2-alpha kinase 2                                       | 0  | 2  | 0  |
| 21703744  | Eif2b1  | eukaryotic translation initiation factor 2B, subunit 1                                          | 1  | 0  | 0  |
| 219842353 | Eif2c2  | eukaryotic translation initiation factor 2C, 2                                                  | 1  | 9  | 4  |
| 50838806  | Eif4g3  | eukaryotic translation initiation factor 4 gamma, 3                                             | 2  | 1  | 0  |
| 56699434  | Eif4g1  | eukaryotic translation initiation factor 4, gamma 1 isoform a                                   | 16 | 5  | 2  |
| 110630015 | Eif4g2  | eukaryotic translation initiation factor 4, gamma 2 isoform 1                                   | 3  | 0  | 1  |
| 20149756  | Eif4a3  | eukaryotic translation initiation factor 4A, isoform 3                                          | 1  | 2  | 6  |
| 21450625  | Eif4a1  | eukaryotic translation initiation factor 4A1 isoform 1                                          | 18 | 7  | 8  |
| 176865892 | Eif4a2  | eukaryotic translation initiation factor 4A2 isoform b                                          | 5  | 3  | 0  |
| 167234372 | Eif4b   | eukaryotic translation initiation factor 4B                                                     | 10 | 3  | 0  |
| 83627717  | Eif4e   | eukaryotic translation initiation factor 4E                                                     | 1  | 1  | 0  |
| 85677508  | Eif4e2  | eukaryotic translation initiation factor 4E member 2 isoform 1                                  | 1  | 0  | 1  |
| 15808988  | Eif4h   | eukaryotic translation initiation factor 4H                                                     | 6  | 4  | 1  |
| 124430541 | Eif5    | eukaryotic translation initiation factor 5                                                      | 2  | 1  | 1  |
| 262359900 | Eif5a   | eukaryotic translation initiation factor 5A                                                     | 3  | 5  | 0  |
| 29243942  | Eif5a2  | eukaryotic translation initiation factor 5A2                                                    | 2  | 1  | 1  |
| 84043961  | Eif5b   | eukaryotic translation initiation factor 5B                                                     | 9  | 11 | 0  |
| 124286826 | Etf1    | eukaryotic translation termination factor 1                                                     | 6  | 5  | 0  |
| 6755522   | Ecsit   | evolutionarily conserved signaling intermediate in Toll pathway                                 | 1  | 0  | 0  |
| 88853581  | Ewsr1   | Ewing sarcoma breakpoint region 1                                                               | 1  | 3  | 0  |
| 187960071 | Ercc1   | excision repair cross-complementing rodent repair deficiency, complementation group 1 isoform a | 0  | 1  | 0  |
| 19526800  | Ercc3   | excision repair cross-complementing rodent repair deficiency, complementation group 3           | 0  | 2  | 0  |
| 21313438  | Exoc2   | exocyst complex component 2                                                                     | 0  | 0  | 1  |
| 46402177  | Exoc5   | exocyst complex component 5                                                                     | 1  | 0  | 0  |
| 257796249 | Exph5   | exophilin 5                                                                                     | 1  | 0  | 0  |
| 257096005 | Exosc1  | exosome component 1                                                                             | 0  | 6  | 1  |
| 227116266 | Exosc10 | exosome component 10                                                                            | 0  | 2  | 0  |
| 21450259  | Exosc2  | exosome component 2                                                                             | 0  | 7  | 0  |
| 29611663  | Exosc4  | exosome component 4                                                                             | 0  | 5  | 0  |
| 20070392  | Exosc5  | exosome component 5                                                                             | 1  | 5  | 1  |
| 30794378  | Exosc6  | exosome component 6                                                                             | 1  | 5  | 2  |
| 124487127 | Exosc7  | exosome component 7                                                                             | 1  | 3  | 0  |
| 9506981   | Exosc9  | exosome component 9                                                                             | 1  | 6  | 1  |
| 112807209 | Ext1    | exostosin 1                                                                                     | 0  | 0  | 1  |

|           |         |                                                         |    |     |    |
|-----------|---------|---------------------------------------------------------|----|-----|----|
| 78190507  | Xpo1    | exportin 1, CRM1 homolog                                | 4  | 1   | 9  |
| 10048438  | Xpo4    | exportin 4                                              | 1  | 0   | 0  |
| 24429570  | Xpo5    | exportin 5                                              | 2  | 0   | 2  |
| 12746422  | Xpo7    | exportin 7                                              | 0  | 4   | 0  |
| 124486686 | Xpot    | exportin, tRNA (nuclear export receptor for tRNAs)      | 0  | 0   | 1  |
| 33859650  | Esy1    | extended synaptotagmin-like protein 1                   | 25 | 0   | 1  |
| 27734847  | F11r    | F11 receptor                                            | 4  | 0   | 0  |
| 161086971 | Capza1  | F-actin capping protein alpha-1 subunit                 | 1  | 8   | 6  |
| 85701644  | Fam82a2 | family with sequence similarity 82, member A2           | 1  | 0   | 7  |
| 269914118 | Fam83h  | family with sequence similarity 83, member H            | 0  | 1   | 17 |
| 61098124  | Fam98b  | family with sequence similarity 98, member B            | 0  | 2   | 0  |
| 54112418  | Fancm   | Fanconi anemia, complementation group M                 | 0  | 0   | 1  |
| 84662730  | Fubp1   | far upstream element (FUSE) binding protein 1           | 5  | 17  | 0  |
| 224922832 | Fubp3   | far upstream element (FUSE) binding protein 3           | 1  | 18  | 6  |
| 19882207  | Fdps    | farnesyl diphosphate synthase                           | 12 | 0   | 0  |
| 315013583 | Daxx    | Fas death domain-associated protein                     | 0  | 1   | 0  |
| 27369557  | Fastkd2 | FAST kinase domains 2                                   | 0  | 0   | 1  |
| 128485706 | Fastkd3 | FAST kinase domains 3                                   | 1  | 0   | 0  |
| 225703041 | Fastkd5 | FAST kinase domains 5                                   | 2  | 0   | 0  |
| 157951641 | Fat1    | FAT tumor suppressor homolog 1                          | 0  | 1   | 0  |
| 9790071   | Fads2   | fatty acid desaturase 2                                 | 5  | 0   | 4  |
| 93102409  | Fasn    | fatty acid synthase                                     | 34 | 0   | 3  |
| 100818178 | Kdm2a   | F-box and leucine-rich repeat protein 11                | 1  | 3   | 0  |
| 40254240  | Fbx19   | F-box and leucine-rich repeat protein 19                | 1  | 0   | 0  |
| 111494221 | Fbx120  | F-box and leucine-rich repeat protein 20                | 0  | 1   | 0  |
| 124248556 | Fbxw9   | F-box and WD-40 domain protein 9                        | 0  | 0   | 1  |
| 46877055  | Fbxo3   | F-box only protein 3 isoform 1                          | 1  | 0   | 1  |
| 124486644 | Fbxo11  | F-box protein 11                                        | 0  | 1   | 0  |
| 28201989  | Fbxo28  | F-box protein 28                                        | 0  | 1   | 1  |
| 13384764  | Fbxo36  | F-box protein 36                                        | 0  | 1   | 0  |
| 160333600 | Fbxo38  | F-box protein 38                                        | 1  | 1   | 0  |
| 169790797 | Fcgbp   | Fc fragment of IgG binding protein                      | 38 | 2   | 0  |
| 27734132  | Fem1c   | fem-1 homolog c                                         | 0  | 1   | 1  |
| 229892332 | Farp2   | FERM, RhoGEF and pleckstrin domain protein 2            | 0  | 0   | 1  |
| 110349752 | Farp1   | FERMRhoGEF (Arhgef) and pleckstrin domain protein 1     | 0  | 0   | 4  |
| 6679765   | Fdx1    | ferredoxin 1                                            | 3  | 0   | 0  |
| 6753912   | Fth1    | ferritin heavy chain 1                                  | 4  | 0   | 0  |
| 114326466 | Ftl1    | ferritin light chain 1                                  | 1  | 1   | 0  |
| 130485277 | Ftl2    | ferritin light chain 2                                  | 3  | 4   | 0  |
| 20452466  | Fech    | ferrochelatase                                          | 0  | 2   | 0  |
| 31982373  | Fbl     | fibrillarlin                                            | 3  | 17  | 15 |
| 29244340  | Frs2    | fibroblast growth factor receptor substrate 2           | 0  | 0   | 1  |
| 124517704 | Fbln2   | fibulin 2 isoform a                                     | 0  | 1   | 1  |
| 145966915 | Flnb    | filamin B, beta                                         | 73 | 107 | 39 |
| 253795477 | Fblim1  | filamin binding LIM protein 1                           | 0  | 0   | 1  |
| 125347376 | Flna    | filamin, alpha                                          | 22 | 46  | 1  |
| 227330598 | Fip11   | FIP1 like 1 isoform 2                                   | 0  | 8   | 1  |
| 227330586 | Mtor    | FK506 binding protein 12-rapamycin associated protein 1 | 1  | 0   | 0  |
| 6679803   | Fkbp1a  | FK506 binding protein 1A, 12kDa                         | 1  | 0   | 0  |
| 261824055 | Fkbp2   | FK506 binding protein 2, 13kDa                          | 6  | 4   | 0  |
| 7305061   | Fkbp3   | FK506 binding protein 3, 25kDa                          | 3  | 7   | 0  |
| 6753884   | Fkbp5   | FK506 binding protein 5                                 | 18 | 3   | 2  |
| 6753882   | Fkbp4   | FK506 binding protein 52                                | 9  | 1   | 0  |

|           |               |                                                                   |    |    |   |
|-----------|---------------|-------------------------------------------------------------------|----|----|---|
| 313851007 | Fkbp8         | FK506 binding protein 8 isoform a                                 | 2  | 0  | 2 |
| 172072617 | Fkbp9         | FK506 binding protein 9                                           | 2  | 0  | 0 |
| 46048490  | Fen1          | flap structure specific endonuclease 1                            | 3  | 7  | 0 |
| 11528490  | Flii          | flightless I homolog                                              | 4  | 27 | 1 |
| 6679809   | Flot1         | flotillin 1                                                       | 0  | 0  | 1 |
| 94536791  | Flot2         | flotillin 2 isoform 2                                             | 0  | 1  | 2 |
| 160333168 | Fiz1          | Flt3 interacting zinc finger protein 1                            | 0  | 1  | 0 |
| 255003742 | Flywch1       | FLYWCH-type zinc finger 1                                         | 1  | 0  | 0 |
| 82546826  | Foxk1         | forkhead box K1                                                   | 0  | 1  | 0 |
| 238018071 | Foxk2         | forkhead box K2                                                   | 0  | 1  | 0 |
| 167900466 | Fnbp1l        | formin binding protein 1-like isoform 2                           | 1  | 2  | 0 |
| 9055218   | Prpf40a       | formin binding protein 3                                          | 1  | 28 | 9 |
| 9055220   | Fnbp4         | formin binding protein 4                                          | 0  | 1  | 0 |
| 37674240  | Fhod3         | formin homology 2 domain containing 3                             | 0  | 1  | 0 |
| 114052809 | 2610204M08Rik | formin, inverted                                                  | 4  | 0  | 2 |
| 38708163  | Fmnl3         | formin-like 3 protein                                             | 2  | 0  | 5 |
| 124378048 | Fmnl2         | formin-like domain containing protein MAN                         | 1  | 0  | 1 |
| 226823218 | Fytd1         | forty-two-three domain containing 1 isoform 1                     | 0  | 0  | 2 |
| 116517340 | Fh1           | four and a half LIM domains 1 isoform 2                           | 0  | 0  | 1 |
| 225543434 | 4932438A13Rik | fragile site-associated protein                                   | 2  | 1  | 0 |
| 51036613  | Fmr1          | fragile X mental retardation protein 1                            | 3  | 2  | 3 |
| 83921589  | Fxr2          | fragile X mental retardation-related protein 2                    | 3  | 4  | 1 |
| 126157515 | Fras1         | Fras1 protein                                                     | 1  | 0  | 0 |
| 71051607  | Frem2         | Fras1 related extracellular matrix protein 2                      | 4  | 0  | 0 |
| 6679863   | Fxn           | frataxin                                                          | 3  | 0  | 0 |
| 293597569 | Aldoa         | fructose-bisphosphate aldolase A                                  | 22 | 12 | 1 |
| 225543552 | Frg1          | FSHD region gene 1                                                | 0  | 6  | 0 |
| 13384672  | Ftsj3         | FtsJ homolog 3                                                    | 1  | 0  | 7 |
| 41281971  | Fuk           | fucokinase isoform 2                                              | 1  | 0  | 0 |
| 31560444  | Fut8          | fucosyltransferase 8                                              | 2  | 0  | 0 |
| 226823367 | Fh1           | fumarate hydratase 1                                              | 14 | 1  | 0 |
| 21312526  | Fundc1        | FUN14 domain containing 1                                         | 0  | 1  | 0 |
| 262050556 | Fundc2        | FUN14 domain containing 2                                         | 2  | 1  | 0 |
| 122937372 | Fusip1        | FUS interacting protein (serine-arginine rich) 1 isoform 1        | 0  | 5  | 6 |
| 16554572  | Fxyd2         | FXYP domain-containing ion transport regulator 2 isoform a        | 2  | 0  | 0 |
| 227116298 | Frk           | fyn-related kinase                                                | 5  | 0  | 0 |
| 85719309  | Fgd3          | FYVE, RhoGEF and PH domain containing 3                           | 0  | 1  | 0 |
| 170650599 | Gfm1          | G elongation factor, mitochondrial 1                              | 11 | 0  | 2 |
| 125991228 | Gpkow         | G patch domain and KOW motifs                                     | 0  | 1  | 0 |
| 13385692  | Gpatch1       | G patch domain containing 1                                       | 0  | 0  | 1 |
| 295424137 | Gps1          | G protein pathway suppressor 1                                    | 2  | 0  | 0 |
| 241896916 | Gpr125        | G protein-coupled receptor 125 isoform 1                          | 0  | 0  | 1 |
| 98986316  | Gpr177        | G protein-coupled receptor 177                                    | 2  | 0  | 0 |
| 124430559 | Lgr4          | G protein-coupled receptor 48                                     | 0  | 1  | 0 |
| 312032400 | Gpr56         | G protein-coupled receptor 56                                     | 2  | 0  | 1 |
| 116517297 | Git2          | G protein-coupled receptor kinase interacting ArfGAP 2 isoform 2  | 0  | 1  | 0 |
| 51921285  | Git1          | G protein-coupled receptor kinase-interactor 1                    | 0  | 0  | 2 |
| 225543465 | Gprc5a        | G protein-coupled receptor, family C, group 5, member A           | 2  | 2  | 2 |
| 160333231 | Gprc5c        | G protein-coupled receptor, family C, group 5, member C isoform b | 3  | 0  | 6 |
| 194018533 | Gspt1         | G1 to S phase transition 1 isoform 1                              | 4  | 0  | 0 |

|           |               |                                                                        |    |    |   |
|-----------|---------------|------------------------------------------------------------------------|----|----|---|
| 34328119  | Gabpa         | GA repeat binding protein, alpha                                       | 0  | 6  | 1 |
| 46575942  | Gabpb1        | GA repeat binding protein, beta 1 isoform a                            | 0  | 1  | 0 |
| 93102413  | Galk1         | galactokinase 1                                                        | 3  | 0  | 0 |
| 30424748  | Galk2         | galactokinase 2                                                        | 1  | 0  | 0 |
| 302370951 | Galns         | galactosamine (N-acetyl)-6-sulfate sulfatase precursor                 | 2  | 0  | 0 |
| 93102411  | Galc          | galactosylceramidase                                                   | 1  | 0  | 2 |
| 225543163 | Lgals3        | galectin 3                                                             | 5  | 0  | 1 |
| 6753992   | Gja1          | gap junction protein, alpha 1                                          | 0  | 1  | 0 |
| 6679951   | Gata3         | GATA binding protein 3                                                 | 0  | 0  | 2 |
| 161086973 | Gatad1        | GATA zinc finger domain containing 1                                   | 0  | 1  | 0 |
| 112807186 | Gcn111        | GCN1 general control of amino-acid synthesis 1-like 1                  | 6  | 1  | 3 |
| 226437608 | 1810007M14Rik | GC-rich sequence DNA-binding factor candidate                          | 0  | 4  | 5 |
| 22122523  | Gmgs          | GDP-mannose 4,6-dehydratase                                            | 5  | 0  | 0 |
| 19526884  | Gmppa         | GDP-mannose pyrophosphorylase A                                        | 1  | 0  | 0 |
| 28916693  | Gsn           | gelsolin                                                               | 14 | 8  | 7 |
| 110227379 | Capg          | gelsolin-like capping protein isoform 2                                | 9  | 1  | 3 |
| 262263303 | Gemin5        | gem (nuclear organelle) associated protein 5                           | 0  | 0  | 1 |
| 225543576 | Gtl3          | gene trap locus 3                                                      | 0  | 7  | 0 |
| 87299617  | Gtf2a2        | general transcription factor II A, 2                                   | 0  | 1  | 0 |
| 21312660  | Gtf2e1        | general transcription factor II E, polypeptide 1 (alpha subunit)       | 0  | 1  | 0 |
| 268838784 | Gtf2e2        | general transcription factor II E, polypeptide 2 (beta subunit)        | 0  | 1  | 0 |
| 188035919 | Gtf2h1        | general transcription factor II H, polypeptide 1                       | 0  | 2  | 0 |
| 6754094   | Gtf2h4        | general transcription factor II H, polypeptide 4                       | 0  | 2  | 0 |
| 125625345 | Gtf2ird1      | general transcription factor II I repeat domain-containing 1 isoform a | 1  | 0  | 1 |
| 20270031  | Gtf2f1        | general transcription factor IIF, polypeptide 1                        | 1  | 1  | 0 |
| 39930425  | Gtf2f2        | general transcription factor IIF, polypeptide 2                        | 0  | 1  | 0 |
| 31088894  | Gtf2h3        | general transcription factor IIH, polypeptide 3                        | 0  | 1  | 0 |
| 46402235  | Gtf3c1        | general transcription factor III C 1                                   | 0  | 4  | 0 |
| 124001578 | Gtf2i         | general transcription factor III isoform 1                             | 2  | 16 | 0 |
| 22507323  | Gtf3c5        | general transcription factor III polypeptide 5                         | 0  | 2  | 0 |
| 260436918 | Gtf3c4        | general transcription factor III C 4                                   | 0  | 11 | 2 |
| 85861229  | Gtf3c2        | general transcription factor III C, polypeptide 2, beta                | 0  | 3  | 0 |
| 75677510  | Gtf3c3        | general transcription factor III C, polypeptide 3                      | 0  | 7  | 1 |
| 269973917 | Gphn          | gephyrin                                                               | 2  | 0  | 0 |
| 160333071 | Gmcl1         | germ cell-less                                                         | 0  | 0  | 2 |
| 9055336   | Gipc1         | GIPC PDZ domain containing family, member 1                            | 1  | 6  | 0 |
| 8394258   | Gipc2         | GIPC PDZ domain containing family, member 2                            | 5  | 11 | 1 |
| 188528613 | Gmfb          | glia maturation factor, beta                                           | 0  | 2  | 0 |
| 160298168 | Gbas          | glioblastoma amplified                                                 | 3  | 0  | 1 |
| 113866026 | Glis3         | GLIS family zinc finger 3                                              | 1  | 1  | 0 |
| 121247453 | Nr3c1         | glucocorticoid receptor                                                | 0  | 0  | 1 |
| 75677442  | Grif1         | glucocorticoid receptor DNA binding factor 1                           | 1  | 0  | 0 |
| 29789239  | Gns           | glucosamine (N-acetyl)-6-sulfatase                                     | 3  | 0  | 0 |
| 9506761   | Gnpnat1       | glucosamine-phosphate N-acetyltransferase 1                            | 0  | 1  | 0 |
| 254553458 | Gpi1          | glucose phosphate isomerase 1                                          | 7  | 0  | 2 |
| 227330582 | G6pd2         | glucose-6-phosphate dehydrogenase 2                                    | 4  | 0  | 0 |
| 6996917   | G6pdx         | glucose-6-phosphate dehydrogenase X-linked                             | 5  | 0  | 0 |
| 116734815 | Gba           | glucosidase, beta, acid isoform 1                                      | 1  | 0  | 0 |
| 6754098   | Gusb          | glucuronidase, beta                                                    | 4  | 0  | 0 |
| 160298209 | Got1          | glutamate oxaloacetate transaminase 1, soluble                         | 1  | 0  | 0 |
| 6754036   | Got2          | glutamate oxaloacetate transaminase 2, mitochondrial                   | 30 | 6  | 0 |

|           |         |                                                                       |    |   |    |
|-----------|---------|-----------------------------------------------------------------------|----|---|----|
| 160298215 | Grik5   | glutamate receptor, ionotropic, kainate 5 (gamma 2) precursor         | 0  | 0 | 1  |
| 258645114 | Grin1a  | glutamate receptor, ionotropic, N-methyl D-aspartate-like 1A          | 0  | 1 | 0  |
| 163937861 | Grwd1   | glutamate-rich WD repeat containing 1                                 | 1  | 5 | 0  |
| 164607135 | Gls     | glutaminase isoform 2                                                 | 21 | 0 | 0  |
| 166295183 | Qrich1  | glutamine-rich 1                                                      | 0  | 1 | 0  |
| 269954679 | Qars    | glutamyl-tRNA synthetase                                              | 8  | 1 | 1  |
| 82617575  | Eprs    | glutamyl-prolyl-tRNA synthetase                                       | 1  | 3 | 1  |
| 21312153  | Glrx5   | glutaredoxin 5                                                        | 4  | 0 | 0  |
| 113680425 | Gcdh    | glutaryl-Coenzyme A dehydrogenase                                     | 2  | 1 | 0  |
| 84871986  | Gpx1    | glutathione peroxidase 1                                              | 11 | 1 | 9  |
| 90903235  | Gpx4    | glutathione peroxidase 4 isoform 1 precursor                          | 0  | 5 | 1  |
| 160298213 | Gsr     | glutathione reductase precursor                                       | 1  | 0 | 0  |
| 21313138  | Gstk1   | glutathione S-transferase kappa 1                                     | 3  | 5 | 0  |
| 6754084   | Gstm1   | glutathione S-transferase mu 1                                        | 14 | 0 | 7  |
| 6680121   | Gstm2   | glutathione S-transferase mu 2                                        | 7  | 2 | 8  |
| 6754086   | Gstm5   | glutathione S-transferase mu 5                                        | 1  | 1 | 2  |
| 6754090   | Gsto1   | glutathione S-transferase omega 1                                     | 8  | 0 | 4  |
| 116325999 | Gsta3   | glutathione S-transferase, alpha 3                                    | 4  | 0 | 2  |
| 160298217 | Gsta4   | glutathione S-transferase, alpha 4                                    | 3  | 0 | 3  |
| 10092608  | Gstp1   | glutathione S-transferase, pi 1                                       | 3  | 2 | 3  |
| 160298219 | Gstt1   | glutathione S-transferase, theta 1                                    | 1  | 0 | 0  |
| 21536248  | Gstt3   | glutathione S-transferase, theta 3                                    | 2  | 0 | 5  |
| 6680117   | Gss     | glutathione synthetase                                                | 3  | 0 | 0  |
| 6754092   | Gstz1   | glutathione transferase zeta 1 (maleylacetoacetate isomerase)         | 6  | 0 | 0  |
| 6753966   | Gpd1    | glycerol-3-phosphate dehydrogenase 1 (soluble)                        | 9  | 0 | 5  |
| 257467604 | Gpd1l   | glycerol-3-phosphate dehydrogenase 1-like                             | 5  | 0 | 0  |
| 224922806 | Gpd2    | glycerol-3-phosphate dehydrogenase 2, mitochondrial                   | 32 | 1 | 12 |
| 160298207 | Gnpat   | glyceronephosphate O-acyltransferase                                  | 2  | 0 | 0  |
| 23956140  | Gdpp1   | glycerophosphodiester phosphodiesterase domain containing 1           | 3  | 0 | 0  |
| 110431346 | Gdpp3   | glycerophosphodiester phosphodiesterase domain containing 3           | 3  | 0 | 0  |
| 240120119 | Gcat    | glycine C-acetyltransferase isoform a                                 | 10 | 0 | 0  |
| 13386066  | Gcsh    | glycine cleavage system protein H (aminomethyl carrier)               | 1  | 0 | 0  |
| 9790077   | Gsk3b   | glycogen synthase kinase 3 beta                                       | 1  | 4 | 0  |
| 31560404  | Gltp    | glycolipid transfer protein                                           | 1  | 0 | 0  |
| 50345976  | Gp1bb   | glycoprotein 1b, beta polypeptide isoform 1                           | 1  | 1 | 0  |
| 226342960 | Tecr    | glycoprotein, synaptic 2 isoform 1                                    | 9  | 2 | 9  |
| 260166652 | GlT28d2 | glycosyltransferase 28 domain containing 1-like                       | 0  | 0 | 1  |
| 27369952  | Gtdc1   | glycosyltransferase-like domain containing 1                          | 1  | 0 | 0  |
| 93102417  | Gars    | glycyl-tRNA synthetase                                                | 11 | 1 | 0  |
| 165932333 | Glo1    | glyoxalase 1                                                          | 6  | 0 | 0  |
| 255003777 | Glod4   | glyoxalase domain containing 4                                        | 10 | 0 | 0  |
| 17933768  | Grhpr   | glyoxylate reductase/hydroxypyruvate reductase                        | 5  | 0 | 0  |
| 7710028   | Gpc1    | glypican 1                                                            | 0  | 0 | 1  |
| 6806917   | Gm2a    | GM2 ganglioside activator protein                                     | 4  | 0 | 0  |
| 117959930 | Gnas    | GNAS complex locus XLas                                               | 6  | 3 | 10 |
| 6677905   | Glg1    | golgi apparatus protein 1                                             | 31 | 1 | 3  |
| 313151170 | Gopc    | golgi associated PDZ and coiled-coil motif containing                 | 1  | 0 | 0  |
| 22122347  | Gga1    | golgi associated, gamma adaptin ear containing, ARF binding protein 1 | 2  | 0 | 0  |
| 30794192  | Golga1  | golgi autoantigen, golgin subfamily a, 1                              | 3  | 0 | 0  |



|           |            |                                                                           |    |    |    |
|-----------|------------|---------------------------------------------------------------------------|----|----|----|
| 124378042 | Golga2     | golgi autoantigen, golgin subfamily a, 2 isoform a                        | 6  | 0  | 1  |
| 31982330  | Golga3     | Golgi autoantigen, golgin subfamily a, 3                                  | 0  | 1  | 1  |
| 20127150  | Golga4     | golgi autoantigen, golgin subfamily a, 4                                  | 0  | 0  | 1  |
| 312222675 | Golga5     | golgi autoantigen, golgin subfamily a, 5                                  | 15 | 0  | 0  |
| 268370067 | Gcc1       | Golgi coiled coil protein 1                                               | 1  | 0  | 1  |
| 14140240  | Golph3     | golgi phosphoprotein 3                                                    | 2  | 0  | 0  |
| 295054284 | Golph3l    | golgi phosphoprotein 3-like                                               | 2  | 0  | 0  |
| 224967109 | Gorasp2    | golgi reassembly stacking protein 2                                       | 3  | 0  | 0  |
| 31542904  | Gosr1      | golgi SNAP receptor complex member 1                                      | 3  | 1  | 1  |
| 24528553  | Gosr2      | golgi SNAP receptor complex member 2                                      | 2  | 0  | 0  |
| 52138536  | Gbf1       | golgi-specific brefeldin A-resistance factor 1                            | 2  | 0  | 0  |
| 6754046   | Gpaa1      | GPI anchor attachment protein 1                                           | 2  | 1  | 0  |
| 80861474  | Gcap14     | granule cell antiserum positive 14 isoform 1                              | 0  | 0  | 1  |
| 224967126 | Grn        | granulin                                                                  | 0  | 0  | 2  |
| 148596982 | Grsf1      | G-rich RNA sequence binding factor 1 isoform 1                            | 3  | 2  | 0  |
| 61742806  | Gcc2       | GRIP and coiled-coil domain-containing 2                                  | 8  | 0  | 0  |
| 21312546  | Fam162a    | growth and transformation-dependent protein                               | 7  | 2  | 3  |
| 6678980   | Gadd45b    | growth arrest and DNA-damage-inducible 45 beta                            | 1  | 0  | 0  |
| 269315840 | Gadd45gip1 | growth arrest and DNA-damage-inducible, gamma interacting protein 1       | 2  | 2  | 1  |
| 6679941   | Gas1       | growth arrest specific 1                                                  | 0  | 0  | 1  |
| 312283736 | Ghitm      | growth hormone inducible transmembrane protein                            | 2  | 0  | 1  |
| 13277394  | Grpel1     | GrpE-like 1, mitochondrial                                                | 8  | 1  | 0  |
| 225543388 | Gtpbp2     | GTP binding protein 2 isoform 1                                           | 0  | 0  | 1  |
| 31560110  | Gtpbp4     | GTP binding protein 4                                                     | 0  | 0  | 5  |
| 188528646 | Mtg1       | GTP binding protein 7 (putative)                                          | 0  | 1  | 0  |
| 40254514  | Gapvd1     | GTPase activating protein and VPS9 domains 1                              | 0  | 1  | 0  |
| 163310721 | Garnl1     | GTPase activating RANGAP domain-like 1 isoform 2                          | 1  | 0  | 2  |
| 85861218  | Gmps       | guanine monophosphate synthetase                                          | 10 | 0  | 0  |
| 41054806  | Gnai2      | guanine nucleotide binding protein (G protein), alpha inhibiting 2        | 3  | 1  | 9  |
| 33563256  | Gnai3      | guanine nucleotide binding protein (G protein), alpha inhibiting 3        | 9  | 2  | 10 |
| 6680047   | Gnb2l1     | guanine nucleotide binding protein (G protein), beta polypeptide 2 like 1 | 11 | 17 | 5  |
| 294774564 | Gng12      | guanine nucleotide binding protein (G protein), gamma 12                  | 4  | 4  | 4  |
| 84579906  | Gng5       | guanine nucleotide binding protein (G protein), gamma 5 subunit           | 1  | 0  | 0  |
| 6754004   | Gna11      | guanine nucleotide binding protein, alpha 11                              | 5  | 0  | 0  |
| 89001109  | Gna13      | guanine nucleotide binding protein, alpha 13                              | 4  | 0  | 0  |
| 84662745  | Gnaq       | guanine nucleotide binding protein, alpha q polypeptide                   | 3  | 0  | 0  |
| 240120093 | Gnl2       | guanine nucleotide binding protein-like 2 (nucleolar)                     | 0  | 0  | 2  |
| 229608938 | Gnb1       | guanine nucleotide-binding protein, beta-1 subunit                        | 5  | 2  | 5  |
| 13937391  | Gnb2       | guanine nucleotide-binding protein, beta-2 subunit                        | 11 | 8  | 12 |
| 33859560  | Gdi1       | guanosine diphosphate (GDP) dissociation inhibitor 1                      | 11 | 0  | 0  |
| 116089273 | Gdi2       | guanosine diphosphate (GDP) dissociation inhibitor 2                      | 21 | 6  | 0  |
| 6753950   | Gbp2       | guanylate binding protein 2                                               | 1  | 0  | 0  |
| 31560697  | H1f0       | H1 histone family, member 0                                               | 2  | 5  | 7  |
| 7106331   | H2afx      | H2A histone family, member X                                              | 2  | 3  | 6  |
| 283945575 | H2afy      | H2A histone family, member Y isoform 1                                    | 0  | 1  | 19 |
| 7949045   | H2afz      | H2A histone family, member Z                                              | 4  | 5  | 6  |
| 6680159   | H3f3a      | H3 histone, family 3A                                                     | 1  | 1  | 1  |
| 6677819   | Rras       | Harvey rat sarcoma oncogene, subgroup R                                   | 2  | 1  | 2  |
| 7106329   | Gsg2       | haspin                                                                    | 0  | 0  | 1  |

|           |          |                                                                                                     |    |    |    |
|-----------|----------|-----------------------------------------------------------------------------------------------------|----|----|----|
| 122056689 | Crebzf   | HCF-binding transcription factor Zhangfei                                                           | 1  | 0  | 0  |
| 6754160   | Hax1     | HCLS1 associated X-1                                                                                | 1  | 0  | 1  |
| 160948577 | Hs1bp3   | HCLS1 binding protein 3                                                                             | 2  | 0  | 0  |
| 75832031  | Hddc2    | HD domain containing 2                                                                              | 1  | 0  | 0  |
| 21312092  | Hddc3    | HD domain containing 3                                                                              | 1  | 0  | 0  |
| 84370019  | Heca     | headcase homolog                                                                                    | 0  | 1  | 0  |
| 38505263  | Heatr5a  | HEAT repeat containing 5A                                                                           | 0  | 0  | 1  |
| 124487157 | Heatr5b  | HEAT repeat containing 5B                                                                           | 1  | 0  | 1  |
| 82880662  | Hspa14   | heat shock 70kDa protein 14 isoform 1                                                               | 0  | 4  | 0  |
| 124339826 | Hspa1b   | heat shock 70kDa protein 1B                                                                         | 1  | 1  | 1  |
| 88196788  | Tmem132a | heat shock 70kDa protein 5 binding protein 1                                                        | 1  | 0  | 0  |
| 21311873  | Hsbp1    | heat shock factor binding protein 1                                                                 | 0  | 0  | 2  |
| 6680309   | Hspe1    | heat shock protein 1 (chaperonin 10)                                                                | 6  | 0  | 0  |
| 183396771 | Hspd1    | heat shock protein 1 (chaperonin)                                                                   | 42 | 17 | 19 |
| 6754254   | Hsp90aa1 | heat shock protein 1, alpha                                                                         | 48 | 19 | 19 |
| 40556608  | Hsp90ab1 | heat shock protein 1, beta                                                                          | 26 | 7  | 11 |
| 50345978  | Hspa2    | heat shock protein 2                                                                                | 14 | 13 | 7  |
| 112293266 | Hspa4    | heat shock protein 4                                                                                | 29 | 14 | 2  |
| 40254361  | Hspa4l   | heat shock protein 4 like                                                                           | 5  | 1  | 0  |
| 254540168 | Hspa5    | heat shock protein 5                                                                                | 39 | 11 | 11 |
| 31981690  | Hspa8    | heat shock protein 8                                                                                | 19 | 24 | 22 |
| 162461907 | Hspa9    | heat shock protein 9                                                                                | 33 | 14 | 19 |
| 40807498  | Hrsp12   | heat-responsive protein 12                                                                          | 6  | 0  | 0  |
| 257196144 | Herc1    | hect (homologous to the E6-AP (UBE3A) carboxyl terminus) domain and RCC1 (CHC1)-like domain (RLD) 1 | 1  | 0  | 0  |
| 134288898 | Herc2    | hect (homologous to the E6-AP (UBE3A) carboxyl terminus) domain and RCC1 (CHC1)-like domain (RLD) 2 | 2  | 1  | 1  |
| 32451488  | Herc4    | hect domain and RLD 4                                                                               | 0  | 0  | 1  |
| 146231996 | Huwe1    | HECT, UBA and WWE domain containing 1                                                               | 1  | 0  | 0  |
| 19111156  | Dhx30    | HELG                                                                                                | 1  | 2  | 0  |
| 165932362 | Helb     | helicase (DNA) B                                                                                    | 0  | 0  | 1  |
| 50355943  | Helz     | helicase with zinc finger domain                                                                    | 1  | 0  | 1  |
| 12232371  | Hells    | helicase, lymphoid specific                                                                         | 0  | 8  | 10 |
| 6680237   | Hn1      | hematological and neurological expressed sequence 1                                                 | 0  | 1  | 0  |
| 225007593 | Hmox2    | heme oxygenase (decycling) 2                                                                        | 13 | 0  | 1  |
| 225690608 | Hs6st1   | heparan sulfate 6-O-sulfotransferase 1                                                              | 0  | 1  | 0  |
| 237820655 | Hbxip    | hepatitis B virus x interacting protein                                                             | 1  | 0  | 0  |
| 188497724 | Hdgf     | hepatoma-derived growth factor                                                                      | 7  | 12 | 0  |
| 6680201   | Hdgfrp2  | hepatoma-derived growth factor-related protein 2                                                    | 2  | 6  | 2  |
| 254039596 | Isca2    | HESB like domain containing 1 isoform 1                                                             | 5  | 0  | 0  |
| 21312189  | Isca1    | HESB like domain containing 2                                                                       | 1  | 0  | 0  |
| 171846285 | Hp1bp3   | heterochromatin protein 1, binding protein 3 isoform 1                                              | 0  | 24 | 13 |
| 226443091 | Hnrnpa0  | heterogeneous nuclear ribonucleoprotein A0                                                          | 4  | 13 | 6  |
| 148664250 | Hnrpdl   | heterogeneous nuclear ribonucleoprotein D-like                                                      | 1  | 9  | 7  |
| 110347535 | Hnrpll   | heterogeneous nuclear ribonucleoprotein L-like                                                      | 5  | 21 | 3  |
| 20270289  | Hexim1   | hexamethylene bis-acetamide inducible 1                                                             | 1  | 0  | 0  |
| 225735584 | Hk1      | hexokinase 1 isoform HK1-sb                                                                         | 35 | 37 | 37 |
| 7305143   | Hk2      | hexokinase 2                                                                                        | 6  | 9  | 7  |
| 67514549  | Hexa     | hexosaminidase A                                                                                    | 0  | 3  | 0  |
| 6754186   | Hexb     | hexosaminidase B                                                                                    | 3  | 13 | 0  |
| 31982147  | H6pd     | hexose-6-phosphate dehydrogenase                                                                    | 15 | 1  | 0  |
| 226874952 | Hgs      | HGF-regulated tyrosine kinase substrate isoform 2                                                   | 3  | 1  | 1  |
| 9789977   | Higd1a   | HIG1 domain family, member 1A                                                                       | 0  | 0  | 1  |
| 19527028  | Hdlbp    | high density lipoprotein binding protein                                                            | 14 | 9  | 2  |

|           |           |                                                                 |    |    |    |
|-----------|-----------|-----------------------------------------------------------------|----|----|----|
| 15022805  | Hmg20a    | high mobility group 20A                                         | 0  | 2  | 1  |
| 262331515 | Hmga1     | high mobility group AT-hook 1                                   | 0  | 7  | 2  |
| 6754210   | Hmga2     | high mobility group AT-hook 2                                   | 0  | 8  | 6  |
| 6754208   | Hmgb1     | high mobility group box 1                                       | 1  | 15 | 2  |
| 6680229   | Hmgb2     | high mobility group box 2                                       | 7  | 19 | 5  |
| 6680231   | Hmgb3     | high mobility group box 3                                       | 0  | 5  | 0  |
| 270132746 | Hbp1      | high mobility group box transcription factor 1 isoform 1        | 0  | 0  | 1  |
| 41406074  | Hmgn1     | high mobility group nucleosomal binding domain 1                | 0  | 3  | 2  |
| 8393534   | Hmgn2     | high mobility group nucleosomal binding domain 2                | 0  | 5  | 1  |
| 21313298  | Hmgn3     | high mobility group nucleosomal binding domain 3 isoform Hmgn3a | 0  | 1  | 0  |
| 7949055   | Hpcal1    | hippocalcin-like 1                                              | 5  | 2  | 0  |
| 33468857  | Hint1     | histidine triad nucleotide binding protein 1                    | 4  | 0  | 0  |
| 110625719 | Hint2     | histidine triad nucleotide binding protein 2                    | 3  | 0  | 0  |
| 21312256  | Dcps      | histidine triad protein member 5                                | 11 | 0  | 0  |
| 18079343  | Hars2     | histidyl-tRNA synthetase-like                                   | 2  | 0  | 0  |
| 227116337 | H13       | histocompatibility 13 isoform 2                                 | 3  | 0  | 0  |
| 6754148   | H2-T23    | histocompatibility 2, T region locus 23                         | 1  | 0  | 0  |
| 28076885  | Hat1      | histone acetyltransferase 1                                     | 1  | 0  | 0  |
| 282154803 | Nfu1      | histone cell cycle regulation defective interacting protein 5   | 6  | 0  | 0  |
| 9845257   | Hist1h1c  | histone cluster 1, H1c                                          | 1  | 5  | 2  |
| 30061389  | Hist1h2bl | histone cluster 1, H2bl                                         | 7  | 10 | 23 |
| 6680193   | Hdac1     | histone deacetylase 1                                           | 5  | 7  | 6  |
| 87162464  | Hdac2     | histone deacetylase 2                                           | 2  | 13 | 5  |
| 89257352  | Hdac3     | histone deacetylase 3                                           | 0  | 1  | 0  |
| 194353999 | Hdac6     | histone deacetylase 6                                           | 0  | 5  | 0  |
| 23956212  | Htatsf1   | HIV TAT specific factor 1                                       | 1  | 3  | 0  |
| 312261233 | Bat2      | HLA-B associated transcript 2                                   | 1  | 0  | 0  |
| 30519896  | Bat5      | HLA-B associated transcript 5                                   | 1  | 0  | 0  |
| 9790069   | Bat1a     | HLA-B-associated transcript 1A                                  | 6  | 12 | 7  |
| 33147082  | Bat3      | HLA-B-associated transcript 3                                   | 4  | 0  | 0  |
| 30794254  | Hmgxb4    | HMG box domain containing 4                                     | 0  | 1  | 0  |
| 213417775 | Raly      | hnRNP-associated with lethal yellow short isoform               | 2  | 7  | 14 |
| 6754232   | Hoxa5     | homeo box A5                                                    | 0  | 1  | 0  |
| 160358780 | Hoxb5     | homeo box B5                                                    | 0  | 1  | 0  |
| 21362265  | Hoxb8     | homeo box B8                                                    | 0  | 1  | 0  |
| 158508520 | Hoxd4     | homeo box D4                                                    | 0  | 1  | 0  |
| 31542626  | Hmbx1     | homeobox containing 1                                           | 0  | 1  | 0  |
| 22003856  | Hook1     | hook homolog 1                                                  | 0  | 0  | 1  |
| 124487041 | Hcfc2     | host cell factor 2                                              | 0  | 1  | 1  |
| 34328130  | Hcfc1     | host cell factor C1                                             | 0  | 27 | 0  |
| 32451500  | Hcfc1r1   | host cell factor C1 regulator 1                                 | 0  | 1  | 1  |
| 117938312 | Hivep1    | human immunodeficiency virus type I enhancer binding protein 1  | 1  | 0  | 0  |
| 85861241  | Hivep2    | human immunodeficiency virus type I enhancer binding protein 2  | 1  | 0  | 0  |
| 255308928 | Hip1r     | huntingtin interacting protein 1 related                        | 0  | 4  | 2  |
| 9055244   | Prpf40b   | huntington yeast partner C                                      | 3  | 2  | 0  |
| 226693396 | Hmmr      | hyaluronan mediated motility receptor (RHAMM)                   | 1  | 0  | 0  |
| 61888838  | Hsd17b10  | hydroxyacyl-Coenzyme A dehydrogenase type II                    | 16 | 15 | 8  |
| 227499240 | Hagh      | hydroxyacylglutathione hydrolase isoform 1 precursor            | 3  | 0  | 0  |
| 159110463 | Hmbs      | hydroxymethylbilane synthase isoform 1                          | 3  | 0  | 0  |
| 9789991   | Hsd17b12  | hydroxysteroid (17-beta) dehydrogenase 12                       | 8  | 0  | 5  |

|           |               |                                          |    |    |   |
|-----------|---------------|------------------------------------------|----|----|---|
| 31982273  | Hsd17b4       | hydroxysteroid (17-beta) dehydrogenase 4 | 24 | 25 | 3 |
| 30424792  | Hsd1          | hydroxysteroid dehydrogenase like 1      | 2  | 0  | 0 |
| 125656150 | Hsd12         | hydroxysteroid dehydrogenase like 2      | 11 | 4  | 0 |
| 70887767  | Hic2          | hypermethylated in cancer 2              | 2  | 1  | 1 |
| 22122445  | Cdc73         | hyperparathyroidism 2 homolog            | 0  | 16 | 0 |
| 253314482 | 4732474O15Rik | hypothetical protein                     | 0  | 1  | 0 |
| 149249792 | LOC667106     | hypothetical protein                     | 0  | 0  | 1 |
| 149259263 | LOC672594     | hypothetical protein                     | 0  | 0  | 1 |
| 260593694 | Syde2         | hypothetical protein                     | 1  | 1  | 0 |
| 94384306  | EG667847      | hypothetical protein isoform 2           | 0  | 0  | 1 |
| 19527154  | 6720456B07Rik | hypothetical protein LOC101314           | 1  | 3  | 0 |
| 56090602  | D8Erd738e     | hypothetical protein LOC101966           | 0  | 1  | 0 |
| 295054298 | 0610010K14Rik | hypothetical protein LOC104457           | 0  | 3  | 0 |
| 110625732 | AI314976      | hypothetical protein LOC106821           | 1  | 4  | 0 |
| 19527218  | 1810008A18Rik | hypothetical protein LOC108707           | 0  | 0  | 1 |
| 309267610 | C330006A16Rik | hypothetical protein LOC109299           | 1  | 0  | 0 |
| 22122389  | 1110007A13Rik | hypothetical protein LOC210711           | 1  | 1  | 0 |
| 112817622 | D15Erd621e    | hypothetical protein LOC210998           | 1  | 0  | 0 |
| 253970387 | BC021381      | hypothetical protein LOC212483           | 0  | 0  | 1 |
| 268607692 | BC003965      | hypothetical protein LOC214489           | 1  | 0  | 0 |
| 116812912 | E330016A19Rik | hypothetical protein LOC214763           | 1  | 0  | 0 |
| 21703824  | Fam20b        | hypothetical protein LOC215015           | 5  | 0  | 0 |
| 21450219  | BC017643      | hypothetical protein LOC217370           | 1  | 0  | 0 |
| 226958568 | BC002230      | hypothetical protein LOC217827 isoform 1 | 0  | 1  | 0 |
| 21450053  | Fam49b        | hypothetical protein LOC223601           | 6  | 0  | 0 |
| 85701776  | 5031439G07Rik | hypothetical protein LOC223739           | 1  | 0  | 0 |
| 31541868  | 2310008H04Rik | hypothetical protein LOC224008           | 1  | 0  | 0 |
| 113461986 | D17Wsu92e     | hypothetical protein LOC224647 isoform 1 | 0  | 0  | 1 |
| 161484644 | AI661453      | hypothetical protein LOC224833           | 2  | 1  | 1 |
| 23346595  | 2410015M20Rik | hypothetical protein LOC224904           | 1  | 0  | 2 |
| 124487015 | Fam178a       | hypothetical protein LOC226151           | 0  | 1  | 0 |
| 27369930  | 4632411B12Rik | hypothetical protein LOC226976           | 1  | 0  | 0 |
| 31981884  | A830007P12Rik | hypothetical protein LOC227612           | 1  | 0  | 0 |
| 85701806  | Gm561         | hypothetical protein LOC228715           | 1  | 0  | 0 |
| 124487299 | B230339M05Rik | hypothetical protein LOC228850           | 0  | 1  | 0 |
| 114205395 | D930015E06Rik | hypothetical protein LOC229473           | 0  | 1  | 0 |
| 158341634 | Fam160a1      | hypothetical protein LOC229488           | 0  | 1  | 0 |
| 169646306 | Fam40a        | hypothetical protein LOC229707           | 0  | 0  | 1 |
| 37718970  | AI314180      | hypothetical protein LOC230249           | 4  | 1  | 0 |
| 255003755 | Fam76a        | hypothetical protein LOC230789 isoform A | 0  | 1  | 0 |
| 85861260  | C230096C10Rik | hypothetical protein LOC230866 isoform 1 | 11 | 0  | 5 |
| 22122693  | BC023882      | hypothetical protein LOC231123           | 0  | 1  | 0 |
| 148664203 | BC023744      | hypothetical protein LOC231668           | 1  | 0  | 0 |
| 55742803  | C330023M02Rik | hypothetical protein LOC231713           | 1  | 3  | 0 |
| 82546849  | C330006K01Rik | hypothetical protein LOC231855           | 0  | 0  | 1 |
| 170650679 | E130309D02Rik | hypothetical protein LOC231868           | 0  | 2  | 0 |
| 29244114  | AU022870      | hypothetical protein LOC231874           | 1  | 0  | 0 |
| 110681698 | D10627        | hypothetical protein LOC234358           | 1  | 0  | 0 |
| 22003884  | 6430527G18Rik | hypothetical protein LOC238330           | 11 | 6  | 2 |
| 159110675 | A630033E08Rik | hypothetical protein LOC240041 isoform b | 0  | 1  | 0 |
| 22122859  | BC031748      | hypothetical protein LOC245622           | 0  | 0  | 1 |
| 124430709 | 2310021P13Rik | hypothetical protein LOC268721           | 0  | 0  | 1 |
| 282396075 | C030048B08Rik | hypothetical protein LOC269623           | 1  | 0  | 0 |
| 267844902 | D6Wsu116e     | hypothetical protein LOC28006            | 1  | 0  | 0 |

|           |               |                                           |   |    |   |
|-----------|---------------|-------------------------------------------|---|----|---|
| 21703842  | D10Wsu52e     | hypothetical protein LOC28088             | 6 | 6  | 2 |
| 18250288  | D17Wsu104e    | hypothetical protein LOC28106             | 3 | 0  | 0 |
| 86198339  | A930041I02Rik | hypothetical protein LOC320271            | 0 | 1  | 0 |
| 254939685 | A430041B07Rik | hypothetical protein LOC328108 isoform 11 | 1 | 0  | 0 |
| 141801938 | D330038O06Rik | hypothetical protein LOC330788            | 0 | 0  | 1 |
| 50284537  | BC049807      | hypothetical protein LOC381066            | 0 | 1  | 0 |
| 197333803 | Fam55c        | hypothetical protein LOC385658            | 0 | 1  | 0 |
| 13384936  | D10Erttd641e  | hypothetical protein LOC52717             | 0 | 2  | 0 |
| 26553441  | D1Bwg0212e    | hypothetical protein LOC52846             | 0 | 0  | 1 |
| 10946822  | 0610007P14Rik | hypothetical protein LOC58520             | 2 | 0  | 1 |
| 292781931 | D14Erttd449e  | hypothetical protein LOC66039             | 2 | 0  | 0 |
| 124487393 | 0910001L09Rik | hypothetical protein LOC66096             | 2 | 0  | 0 |
| 227908787 | 1110008L16Rik | hypothetical protein LOC66132             | 0 | 1  | 0 |
| 13384786  | 1110031I02Rik | hypothetical protein LOC66179             | 0 | 0  | 1 |
| 124487145 | 1110037F02Rik | hypothetical protein LOC66185             | 0 | 15 | 0 |
| 13384816  | 1110059E24Rik | hypothetical protein LOC66206             | 0 | 1  | 0 |
| 13384876  | 1810009A15Rik | hypothetical protein LOC66276             | 0 | 2  | 0 |
| 224177530 | 1810013D10Rik | hypothetical protein LOC66278             | 1 | 0  | 0 |
| 269996023 | 2310008H09Rik | hypothetical protein LOC66356             | 1 | 0  | 0 |
| 30794468  | 2410001C21Rik | hypothetical protein LOC66404             | 1 | 4  | 0 |
| 13385042  | 2010309E21Rik | hypothetical protein LOC66488             | 2 | 0  | 0 |
| 165932364 | 2610528E23Rik | hypothetical protein LOC66497             | 0 | 3  | 0 |
| 242332593 | 2400001E08Rik | hypothetical protein LOC66508             | 1 | 0  | 1 |
| 33457314  | 2310061C15Rik | hypothetical protein LOC66531             | 1 | 0  | 0 |
| 27228993  | 6330409N04Rik | hypothetical protein LOC66674             | 2 | 0  | 0 |
| 160333500 | Gm14446       | hypothetical protein LOC667373 isoform 2  | 1 | 0  | 1 |
| 229577364 | 1200016B10Rik | hypothetical protein LOC66875             | 0 | 0  | 1 |
| 148276987 | 2410002O22Rik | hypothetical protein LOC66975 isoform 2   | 1 | 0  | 0 |
| 13385560  | 2900010M23Rik | hypothetical protein LOC67267             | 1 | 3  | 0 |
| 51571945  | 5730559C18Rik | hypothetical protein LOC67313             | 0 | 1  | 0 |
| 31981066  | 2410127L17Rik | hypothetical protein LOC67383             | 1 | 0  | 0 |
| 227330590 | 1810074P20Rik | hypothetical protein LOC67490             | 1 | 0  | 0 |
| 21313570  | 1810037I17Rik | hypothetical protein LOC67704             | 1 | 0  | 0 |
| 21312800  | 5033414D02Rik | hypothetical protein LOC67759             | 1 | 0  | 6 |
| 268837283 | 5830433M19Rik | hypothetical protein LOC67770             | 0 | 1  | 0 |
| 169646352 | 2610027L16Rik | hypothetical protein LOC67842             | 0 | 2  | 2 |
| 13385904  | 1700021F05Rik | hypothetical protein LOC67851             | 1 | 4  | 0 |
| 13259376  | 2310033P09Rik | hypothetical protein LOC67862             | 1 | 1  | 1 |
| 30424683  | 1810063B05Rik | hypothetical protein LOC67892             | 1 | 1  | 0 |
| 13385950  | 2510049I19Rik | hypothetical protein LOC67922             | 0 | 0  | 1 |
| 13386026  | 2700060E02Rik | hypothetical protein LOC68045             | 8 | 9  | 1 |
| 145587094 | 9430016H08Rik | hypothetical protein LOC68115             | 2 | 0  | 0 |
| 124486662 | 1110014N23Rik | hypothetical protein LOC68505             | 2 | 0  | 1 |
| 85362708  | 2310036O22Rik | hypothetical protein LOC68544             | 0 | 4  | 0 |
| 134053922 | 1110002N22Rik | hypothetical protein LOC68550             | 0 | 4  | 2 |
| 146134519 | 1110020G09Rik | hypothetical protein LOC68646 isoform 2   | 1 | 0  | 0 |
| 170172570 | 1110028C15Rik | hypothetical protein LOC68691 isoform 1   | 0 | 1  | 0 |
| 83649762  | ORF19         | hypothetical protein LOC68767             | 3 | 1  | 0 |
| 112181297 | 1110038D17Rik | hypothetical protein LOC68778             | 1 | 0  | 0 |
| 269995975 | 1110057K04Rik | hypothetical protein LOC68832             | 2 | 0  | 0 |
| 58037137  | 1500032L24Rik | hypothetical protein LOC69029             | 3 | 0  | 1 |
| 110625730 | 1810027O10Rik | hypothetical protein LOC69186             | 1 | 0  | 1 |
| 254675210 | 2310004N24Rik | hypothetical protein LOC69535             | 0 | 1  | 0 |
| 31981558  | 2310037I24Rik | hypothetical protein LOC69612             | 0 | 1  | 0 |

|           |               |                                                 |    |   |    |
|-----------|---------------|-------------------------------------------------|----|---|----|
| 30519953  | 1810026J23Rik | hypothetical protein LOC69773                   | 1  | 0 | 0  |
| 117647253 | 2010321M09Rik | hypothetical protein LOC69882                   | 0  | 9 | 1  |
| 28076933  | 2010305A19Rik | hypothetical protein LOC69893                   | 3  | 0 | 0  |
| 21312460  | 2010107G23Rik | hypothetical protein LOC69894                   | 1  | 0 | 0  |
| 227430284 | 2810432D09Rik | hypothetical protein LOC69961                   | 0  | 2 | 0  |
| 21312536  | 2310005N01Rik | hypothetical protein LOC70088                   | 0  | 2 | 2  |
| 309271794 | 2210011C24Rik | hypothetical protein LOC70134                   | 0  | 2 | 5  |
| 121583673 | 2510012J08Rik | hypothetical protein LOC70312                   | 0  | 0 | 1  |
| 27229101  | 5730469M10Rik | hypothetical protein LOC70564                   | 5  | 0 | 1  |
| 28076961  | 5730508B09Rik | hypothetical protein LOC70617                   | 1  | 0 | 1  |
| 313747468 | 4931406C07Rik | hypothetical protein LOC70984                   | 2  | 0 | 0  |
| 166851844 | 4930506M07Rik | hypothetical protein LOC71653 isoform 2         | 4  | 0 | 0  |
| 117956375 | 0610010F05Rik | hypothetical protein LOC71675                   | 0  | 1 | 0  |
| 251823881 | 1700030K09Rik | hypothetical protein LOC72254                   | 1  | 0 | 0  |
| 262118187 | 2610507B11Rik | hypothetical protein LOC72503                   | 1  | 0 | 0  |
| 198278498 | 2700029M09Rik | hypothetical protein LOC72612                   | 0  | 3 | 0  |
| 139948818 | Fam98a        | hypothetical protein LOC72722                   | 0  | 2 | 0  |
| 315139016 | 2810455K09Rik | hypothetical protein LOC72805                   | 0  | 1 | 0  |
| 28849885  | Fam76b        | hypothetical protein LOC72826                   | 1  | 3 | 0  |
| 153791468 | 3110003A17Rik | hypothetical protein LOC73112                   | 1  | 0 | 0  |
| 146134371 | 3110082I17Rik | hypothetical protein LOC73212                   | 2  | 3 | 1  |
| 158937256 | 2410091C18Rik | hypothetical protein LOC73694                   | 0  | 0 | 1  |
| 21311939  | 1300018I05Rik | hypothetical protein LOC74157                   | 0  | 1 | 0  |
| 33859728  | 4933427D14Rik | hypothetical protein LOC74477                   | 0  | 1 | 0  |
| 21312828  | 4930444A02Rik | hypothetical protein LOC74653                   | 0  | 1 | 0  |
| 70778924  | 4930432O21Rik | hypothetical protein LOC74670                   | 0  | 0 | 1  |
| 188497646 | 4930471M23Rik | hypothetical protein LOC74919                   | 1  | 0 | 0  |
| 41680647  | Fam63a        | hypothetical protein LOC75007                   | 2  | 0 | 0  |
| 90819235  | 4930547N16Rik | hypothetical protein LOC75317                   | 1  | 0 | 1  |
| 27229109  | 3200002M19Rik | hypothetical protein LOC75430                   | 0  | 1 | 0  |
| 145301546 | Fam65a        | hypothetical protein LOC75687                   | 1  | 0 | 0  |
| 113461996 | 6330578E17Rik | hypothetical protein LOC76178                   | 0  | 1 | 0  |
| 268370105 | 1500005K14Rik | hypothetical protein LOC76566                   | 0  | 2 | 1  |
| 124486668 | 1700081L11Rik | hypothetical protein LOC76719                   | 0  | 0 | 1  |
| 166063959 | C330007P06Rik | hypothetical protein LOC77644                   | 0  | 1 | 0  |
| 261599071 | 6030458C11Rik | hypothetical protein LOC77877                   | 1  | 0 | 0  |
| 21704218  | 8430410K20Rik | hypothetical protein LOC78100                   | 0  | 0 | 1  |
| 31044487  | B230219D22Rik | hypothetical protein LOC78521                   | 0  | 5 | 3  |
| 285402250 | 2700078E11Rik | hypothetical protein LOC78832                   | 1  | 0 | 0  |
| 13384892  | BC003266      | hypothetical protein LOC80284                   | 1  | 0 | 0  |
| 190014629 | C430004E15Rik | hypothetical protein LOC97031                   | 0  | 6 | 1  |
| 75677516  | C77080        | hypothetical protein LOC97130                   | 0  | 2 | 0  |
| 247300872 | A430005L14Rik | hypothetical protein LOC97159 isoform 1         | 0  | 2 | 0  |
| 19527012  | 4833439L19Rik | hypothetical protein LOC97820                   | 1  | 0 | 0  |
| 96975138  | Hprt1         | hypoxanthine phosphoribosyltransferase 1        | 4  | 0 | 0  |
| 157951706 | Hyou1         | hypoxia up-regulated 1                          | 39 | 7 | 0  |
| 7657220   | Icosl         | icos ligand                                     | 1  | 0 | 0  |
| 33468955  | Ik            | IK cytokine                                     | 1  | 6 | 10 |
| 31982165  | Ikzf5         | IKAROS family zinc finger 5                     | 0  | 0 | 1  |
| 30424591  | Ilvbl         | ilvB (bacterial acetolactate synthase)-like     | 0  | 1 | 0  |
| 19387848  | Ict1          | immature colon carcinoma transcript 1           | 1  | 4 | 0  |
| 208431800 | Irgq          | immunity-related GTPase family, Q               | 0  | 0 | 1  |
| 304555605 | Igbbp1        | immunoglobulin (CD79A) binding protein 1        | 1  | 0 | 0  |
| 71040102  | Cadm1         | immunoglobulin superfamily, member 4A isoform a | 2  | 0 | 0  |

|           |          |                                                                               |    |    |    |
|-----------|----------|-------------------------------------------------------------------------------|----|----|----|
| 32189434  | Igsf8    | immunoglobulin superfamily, member 8                                          | 1  | 0  | 0  |
| 19527196  | Imp3     | IMP3, U3 small nucleolar ribonucleoprotein, homolog                           | 0  | 3  | 4  |
| 31541898  | Ipo11    | importin 11                                                                   | 0  | 0  | 2  |
| 112734861 | Ipo9     | importin 9                                                                    | 3  | 0  | 4  |
| 55769581  | Inadl    | InaD-like isoform 1                                                           | 1  | 0  | 11 |
| 6678281   | Inmt     | indolethylamine N-methyltransferase                                           | 8  | 0  | 7  |
| 19111152  | Ing4     | inhibitor of growth family, member 4                                          | 0  | 1  | 1  |
| 21313552  | Ing5     | inhibitor of growth family, member 5                                          | 0  | 0  | 1  |
| 70608131  | Immt     | inner membrane protein, mitochondrial                                         | 24 | 0  | 38 |
| 22203753  | Ppa2     | inorganic pyrophosphatase 2                                                   | 5  | 0  | 0  |
| 31981382  | Impdh2   | inosine 5'-phosphate dehydrogenase 2                                          | 1  | 0  | 0  |
| 31982664  | Itpa     | inosine triphosphatase                                                        | 3  | 0  | 0  |
| 31980942  | Impa1    | inositol (myo)-1(or 4)-monophosphatase 1                                      | 6  | 0  | 0  |
| 60593032  | Itp2     | inositol 1,4,5-triphosphate receptor 2 isoform 1                              | 1  | 1  | 1  |
| 61102728  | Itp3     | inositol 1,4,5-triphosphate receptor 3                                        | 0  | 0  | 1  |
| 225903432 | Ip6k2    | inositol hexaphosphate kinase 2                                               | 0  | 1  | 0  |
| 13249351  | Ern1     | inositol-requiring 1 alpha                                                    | 1  | 0  | 0  |
| 121583922 | Ide      | insulin-degrading enzyme                                                      | 9  | 0  | 0  |
| 145207996 | Igf2bp2  | insulin-like growth factor 2 mRNA binding protein 2                           | 16 | 9  | 7  |
| 133778978 | Igf2r    | insulin-like growth factor 2 receptor                                         | 14 | 0  | 0  |
| 226958453 | Igfbp7   | insulin-like growth factor binding protein 7 isoform 2                        | 1  | 1  | 0  |
| 112983656 | Igf1r    | insulin-like growth factor I receptor                                         | 1  | 0  | 0  |
| 148747128 | Stt3a    | integral membrane protein 1                                                   | 5  | 0  | 0  |
| 6680502   | Itm2b    | integral membrane protein 2B                                                  | 3  | 0  | 0  |
| 294832004 | Ints1    | integrator complex subunit 1                                                  | 1  | 19 | 4  |
| 27229115  | Ints10   | integrator complex subunit 10                                                 | 1  | 2  | 1  |
| 86476084  | Ints2    | integrator complex subunit 2                                                  | 0  | 2  | 1  |
| 31652268  | Ints3    | integrator complex subunit 3                                                  | 0  | 26 | 3  |
| 30794414  | Ints4    | integrator complex subunit 4                                                  | 0  | 13 | 4  |
| 28849895  | Ints5    | integrator complex subunit 5                                                  | 0  | 5  | 2  |
| 51467749  | Ints6    | integrator complex subunit 6                                                  | 0  | 0  | 1  |
| 153791768 | Ints7    | integrator complex subunit 7                                                  | 0  | 2  | 1  |
| 227430333 | Ints8    | integrator complex subunit 8                                                  | 1  | 2  | 0  |
| 7305189   | Itga3    | integrin alpha 3                                                              | 24 | 0  | 0  |
| 31982236  | Itga6    | integrin alpha 6                                                              | 17 | 0  | 0  |
| 268839462 | Itfg1    | integrin alpha FG-GAP repeat containing 1                                     | 2  | 0  | 0  |
| 329744577 | Itfg3    | integrin alpha FG-GAP repeat containing 3                                     | 3  | 0  | 0  |
| 154240716 | Itgav    | integrin alpha V                                                              | 22 | 0  | 0  |
| 45504394  | Itgb1    | integrin beta 1                                                               | 25 | 0  | 0  |
| 6680488   | Itgb1bp1 | integrin beta 1 binding protein 1                                             | 0  | 1  | 0  |
| 110735428 | Itgb4    | integrin beta 4 isoform 1                                                     | 12 | 0  | 0  |
| 225007621 | Itgb5    | integrin beta 5 isoform 1                                                     | 6  | 0  | 0  |
| 227116271 | Itgb6    | integrin beta 6                                                               | 4  | 0  | 1  |
| 240255653 | Ilk      | integrin-linked kinase                                                        | 0  | 1  | 0  |
| 39930415  | Ilkap    | integrin-linked kinase-associated serine/threonine phosphatase 2C             | 0  | 1  | 0  |
| 125628657 | Ifi30    | interferon gamma inducible protein 30                                         | 5  | 0  | 0  |
| 257096038 | Ifih1    | interferon induced with helicase C domain 1                                   | 0  | 1  | 0  |
| 162287051 | Irf2     | interferon regulatory factor 2                                                | 0  | 2  | 0  |
| 31982348  | Irf2bp1  | interferon regulatory factor 2 binding protein 1                              | 1  | 0  | 1  |
| 114145467 | Irf6     | interferon regulatory factor 6                                                | 0  | 1  | 0  |
| 165377193 | Isg20    | interferon stimulated exonuclease                                             | 2  | 4  | 0  |
| 33469019  | Prkrir   | interferon-inducible, double stranded RNA dependent inhibitor, protein-kinase | 0  | 2  | 0  |

|           |         |                                                                           |    |    |    |
|-----------|---------|---------------------------------------------------------------------------|----|----|----|
| 226062273 | lfrd1   | interferon-related developmental regulator 1                              | 1  | 0  | 1  |
| 183396776 | ll1r1   | interleukin 1 receptor, type I isoform 1                                  | 0  | 0  | 1  |
| 13385872  | llf2    | interleukin enhancer binding factor 2                                     | 1  | 17 | 9  |
| 111607436 | llf3    | interleukin enhancer binding factor 3 isoform 1                           | 0  | 23 | 12 |
| 184186088 | lft140  | intraflagellar transport 140                                              | 0  | 1  | 0  |
| 254039594 | lqwd1   | IQ motif and WD repeats 1                                                 | 0  | 1  | 0  |
| 40254171  | lqce    | IQ motif containing E                                                     | 0  | 1  | 1  |
| 242332572 | lqgap1  | IQ motif containing GTPase activating protein 1                           | 55 | 45 | 30 |
| 31543001  | Tbl1xr1 | IRA1 protein                                                              | 0  | 3  | 0  |
| 254281215 | lreb2   | iron responsive element binding protein 2                                 | 0  | 0  | 1  |
| 162417977 | ldh1    | isocitrate dehydrogenase 1 (NADP+), soluble                               | 6  | 0  | 0  |
| 225579033 | ldh2    | isocitrate dehydrogenase 2 (NADP+), mitochondrial                         | 23 | 2  | 6  |
| 18250284  | ldh3a   | isocitrate dehydrogenase 3 (NAD+) alpha                                   | 14 | 0  | 6  |
| 6680345   | ldh3g   | isocitrate dehydrogenase 3 (NAD+), gamma                                  | 8  | 0  | 0  |
| 18700024  | ldh3b   | isocitrate dehydrogenase 3, beta subunit                                  | 16 | 1  | 1  |
| 254553372 | lars    | isoleucine tRNA synthetase                                                | 3  | 0  | 0  |
| 281604088 | ldi1    | isopentenyl-diphosphate delta isomerase isoform 2                         | 4  | 0  | 0  |
| 9789985   | lvd     | isovaleryl coenzyme A dehydrogenase                                       | 12 | 0  | 0  |
| 20149316  | lsy1    | ISY1 splicing factor homolog                                              | 0  | 0  | 3  |
| 124487317 | ltch    | itchy, E3 ubiquitin protein ligase                                        | 1  | 0  | 0  |
| 30352010  | lws1    | IWS1 homolog                                                              | 0  | 9  | 0  |
| 114326480 | Jak2    | Janus kinase 2                                                            | 0  | 0  | 1  |
| 225703114 | Hscb    | J-type co-chaperone HSC20                                                 | 1  | 0  | 0  |
| 334724461 | Jmjd1c  | jumonji domain containing 1C                                              | 0  | 1  | 0  |
| 226958545 | Jarid1a | jumonji, AT rich interactive domain 1A (Rbp2 like) isoform 1              | 0  | 4  | 1  |
| 46049047  | Jtb     | jumping translocation breakpoint                                          | 1  | 0  | 0  |
| 28395018  | Jup     | junction plakoglobin                                                      | 16 | 9  | 27 |
| 31543047  | Kpna1   | karyopherin (importin) alpha 1                                            | 0  | 2  | 1  |
| 6754474   | Kpna2   | karyopherin (importin) alpha 2                                            | 0  | 1  | 2  |
| 6680596   | Kpna3   | karyopherin (importin) alpha 3                                            | 0  | 9  | 1  |
| 227116300 | Kpna6   | karyopherin (importin) alpha 6                                            | 1  | 1  | 1  |
| 88014720  | Kpnb1   | karyopherin (importin) beta 1                                             | 14 | 27 | 21 |
| 6680598   | Kpna4   | karyopherin alpha 4                                                       | 3  | 6  | 3  |
| 84095201  | Katnb1  | katanin p80 (WD40-containing) subunit B 1                                 | 0  | 1  | 0  |
| 12963767  | Kdelc1  | KDEL (Lys-Asp-Glu-Leu) containing 1                                       | 0  | 4  | 0  |
| 47078285  | Kdelc2  | KDEL (Lys-Asp-Glu-Leu) containing 2 protein                               | 2  | 0  | 0  |
| 13385318  | Kdelr2  | KDEL (Lys-Asp-Glu-Leu) endoplasmic reticulum protein retention receptor 2 | 1  | 1  | 1  |
| 19527170  | Kdelr1  | KDEL endoplasmic reticulum protein retention receptor 1                   | 1  | 0  | 1  |
| 124486935 | Kdm3b   | KDM3B lysine (K)-specific demethylase 3B                                  | 1  | 0  | 0  |
| 255683384 | Klhdc4  | kelch domain containing 4                                                 | 1  | 0  | 0  |
| 254540068 | Krt18   | keratin 18                                                                | 30 | 30 | 51 |
| 6680606   | Krt19   | keratin 19                                                                | 26 | 22 | 33 |
| 21592285  | Krt20   | keratin 20                                                                | 19 | 21 | 32 |
| 15431281  | Krt23   | keratin 23                                                                | 0  | 0  | 1  |
| 154090941 | Krt42   | keratin 42                                                                | 2  | 2  | 3  |
| 14861854  | Krt7    | keratin 7                                                                 | 26 | 22 | 38 |
| 124249090 | Krt80   | keratin 80                                                                | 0  | 0  | 1  |
| 114145561 | Krt8    | keratin complex 2, basic, gene 8                                          | 33 | 33 | 57 |
| 13384696  | Krtcap2 | keratinocyte associated protein 2                                         | 1  | 0  | 0  |
| 110626031 | Khdrbs1 | KH domain containing, RNA binding, signal transduction associated 1       | 3  | 4  | 3  |
| 163954948 | Khsrp   | KH-type splicing regulatory protein                                       | 9  | 30 | 3  |



|           |               |                                                            |    |    |    |
|-----------|---------------|------------------------------------------------------------|----|----|----|
| 9910458   | 0610031J06Rik | kidney predominant protein NCU-G1                          | 4  | 0  | 1  |
| 144922638 | Ktn1          | kinectin 1                                                 | 22 | 0  | 2  |
| 120300944 | Kif13a        | kinesin family member 13A                                  | 1  | 2  | 2  |
| 124487163 | Kif13b        | kinesin family member 13B                                  | 5  | 6  | 1  |
| 124487287 | Kif16b        | kinesin family member 16B                                  | 1  | 0  | 0  |
| 86990460  | Kif1b         | kinesin family member 1B isoform b                         | 0  | 0  | 1  |
| 261862322 | Kif20a        | kinesin family member 20A                                  | 0  | 1  | 1  |
| 157823795 | Kif21a        | kinesin family member 21A isoform 4                        | 1  | 0  | 1  |
| 21704182  | Kif22         | kinesin family member 22                                   | 1  | 0  | 0  |
| 224809373 | Kif2a         | kinesin family member 2A isoform 1                         | 0  | 3  | 0  |
| 162287089 | Kif4          | kinesin family member 4                                    | 0  | 1  | 0  |
| 61657921  | Kif5b         | kinesin family member 5B                                   | 15 | 18 | 12 |
| 116642893 | Kifc1         | kinesin family member C1                                   | 0  | 1  | 0  |
| 224967075 | Kifc3         | kinesin family member C3 isoform a                         | 0  | 0  | 1  |
| 131412207 | Klc1          | kinesin light chain 1 isoform 1H                           | 0  | 2  | 0  |
| 22122725  | Klc3          | kinesin light chain 3                                      | 0  | 2  | 0  |
| 13386370  | Klc4          | kinesin light chain 4                                      | 1  | 0  | 0  |
| 226442952 | Krr1          | KRR1, small subunit processome component                   | 0  | 1  | 0  |
| 144922690 | Kif16         | Kruppel-like factor 16                                     | 0  | 1  | 0  |
| 170784840 | Kif2          | Kruppel-like factor 2 (lung)                               | 0  | 1  | 0  |
| 20270210  | Kti12         | KTI12 homolog, chromatin associated                        | 0  | 1  | 0  |
| 34328234  | Spint1        | Kunitz-type protease inhibitor 1 precursor                 | 2  | 0  | 0  |
| 112293279 | L1cam         | L1 cell adhesion molecule                                  | 1  | 0  | 0  |
| 21703884  | L2hgdh        | L-2-hydroxyglutarate dehydrogenase                         | 3  | 1  | 0  |
| 111038118 | Hadh          | L-3-hydroxyacyl-Coenzyme A dehydrogenase                   | 14 | 9  | 2  |
| 226442901 | Larp1         | la related protein                                         | 2  | 0  | 0  |
| 110665742 | Larp7         | La ribonucleoprotein domain family, member 7               | 2  | 3  | 0  |
| 13507666  | Lactb         | lactamase, beta                                            | 0  | 3  | 0  |
| 144922663 | Lace1         | lactation elevated 1                                       | 2  | 0  | 0  |
| 31981555  | Lad1          | ladinin                                                    | 2  | 19 | 2  |
| 22095015  | Lass2         | LAG1 homolog, ceramide synthase 2                          | 3  | 0  | 0  |
| 162287370 | Lmna          | lamin A isoform C                                          | 0  | 34 | 51 |
| 229608895 | Lbr           | lamin B receptor                                           | 1  | 4  | 16 |
| 188219589 | Lmnb1         | lamin B1                                                   | 0  | 23 | 38 |
| 113195686 | Lmnb2         | lamin B2                                                   | 0  | 12 | 32 |
| 114326497 | Lamb1-1       | laminin B1 subunit 1                                       | 24 | 0  | 0  |
| 226423935 | Lama3         | laminin, alpha 3                                           | 0  | 2  | 0  |
| 124487155 | Lama5         | laminin, alpha 5                                           | 1  | 0  | 0  |
| 153791270 | Lamc1         | laminin, gamma 1                                           | 1  | 1  | 0  |
| 19526936  | Lancl2        | LanC (bacterial lantibiotic synthetase component C)-like 2 | 0  | 2  | 3  |
| 22122469  | Lss           | lanosterol synthase                                        | 4  | 0  | 0  |
| 71979675  | Las1l         | LAS1-like                                                  | 0  | 4  | 1  |
| 31980632  | Lxn           | latexin                                                    | 2  | 0  | 2  |
| 157739867 | Lphn1         | latrophilin 1 precursor                                    | 0  | 0  | 1  |
| 124486821 | Lphn2         | latrophilin 2                                              | 1  | 0  | 0  |
| 6678682   | Lgals1        | lectin, galactose binding, soluble 1                       | 5  | 4  | 1  |
| 226531139 | Lgals9        | lectin, galactose binding, soluble 9 isoform 1             | 0  | 0  | 1  |
| 34328278  | Lman2         | lectin, mannose-binding 2                                  | 9  | 0  | 0  |
| 285026450 | Lman1         | lectin, mannose-binding, 1                                 | 8  | 0  | 0  |
| 7242187   | Lgmn          | legumain                                                   | 5  | 2  | 2  |
| 165972321 | Lemd2         | LEM domain containing 2                                    | 0  | 0  | 9  |
| 145864461 | Lemd3         | LEM domain containing 3                                    | 0  | 0  | 8  |
| 19527168  | Psp1          | lens epithelium-derived growth factor                      | 1  | 19 | 0  |

|           |               |                                                                       |    |    |    |
|-----------|---------------|-----------------------------------------------------------------------|----|----|----|
| 27734076  | Leprel1       | leprecan-like 1                                                       | 2  | 0  | 0  |
| 13386094  | Leprotl1      | leptin receptor overlapping transcript-like 1                         | 1  | 0  | 0  |
| 144922656 | Ligl2         | lethal giant larvae homolog 2                                         | 4  | 23 | 0  |
| 255069715 | Lap3          | leucine aminopeptidase 3                                              | 7  | 0  | 0  |
| 162417952 | Lrrfip1       | leucine rich repeat (in FLII) interacting protein 1 isoform 1         | 12 | 7  | 0  |
| 258679524 | Lrrfip2       | leucine rich repeat (in FLII) interacting protein 2                   | 0  | 2  | 0  |
| 254675306 | Lrrcc1        | leucine rich repeat and coiled-coil domain containing 1 isoform 3     | 0  | 0  | 1  |
| 225690585 | Lrrc1         | leucine rich repeat containing 1 isoform 2                            | 3  | 0  | 5  |
| 31541911  | Lrrc40        | leucine rich repeat containing 40                                     | 1  | 0  | 1  |
| 41152116  | Lrrc47        | leucine rich repeat containing 47                                     | 2  | 3  | 0  |
| 19527026  | Lrrc59        | leucine rich repeat containing 59                                     | 10 | 5  | 6  |
| 251823957 | Lrrc8e        | leucine rich repeat containing 8 family, member E                     | 0  | 1  | 0  |
| 119433663 | Luzp1         | leucine zipper protein 1                                              | 1  | 1  | 1  |
| 91208439  | Ncapp2        | leucine zipper protein 5                                              | 1  | 7  | 0  |
| 9789997   | Letm1         | leucine zipper-EF-hand containing transmembrane protein 1             | 17 | 2  | 3  |
| 134031976 | Lrpprc        | leucine-rich PPR motif-containing protein                             | 47 | 29 | 10 |
| 88014689  | Lrig1         | leucine-rich repeats and immunoglobulin-like domains 1                | 1  | 0  | 0  |
| 27370240  | Lnpep         | leucyl/cystinyl aminopeptidase                                        | 10 | 0  | 0  |
| 120537241 | Lars          | leucyl-tRNA synthetase                                                | 2  | 0  | 0  |
| 23346617  | Lars2         | leucyl-tRNA synthetase, mitochondrial                                 | 1  | 0  | 0  |
| 27370082  | Leng8         | leukocyte receptor cluster member 8                                   | 0  | 2  | 0  |
| 116734870 | Lta4h         | leukotriene A4 hydrolase                                              | 7  | 0  | 0  |
| 253683551 | Lcorl         | ligand dependent nuclear receptor corepressor-like isoform 2          | 0  | 0  | 1  |
| 71061470  | Lig3          | ligase III, DNA, ATP-dependent                                        | 1  | 3  | 0  |
| 6754506   | Large         | like-glycosyltransferase                                              | 1  | 0  | 0  |
| 300863089 | Lims1         | LIM and senescent cell antigen-like domains 1                         | 0  | 1  | 0  |
| 6754508   | Lasp1         | LIM and SH3 protein 1                                                 | 8  | 2  | 0  |
| 165905585 | Lima1         | LIM domain and actin binding 1 isoform b                              | 0  | 5  | 21 |
| 164663818 | Ldb1          | LIM domain binding 1 isoform 1                                        | 1  | 0  | 0  |
| 239937458 | Lmo4          | LIM domain only 4                                                     | 0  | 1  | 0  |
| 157311641 | Lmo7          | LIM domain only 7                                                     | 0  | 0  | 18 |
| 77404365  | Limk2         | LIM motif-containing protein kinase 2 isoform b                       | 0  | 1  | 0  |
| 13195646  | Crip2         | LIM only protein HLP                                                  | 5  | 2  | 1  |
| 124487213 | 4921513D23Rik | limkain b1                                                            | 1  | 1  | 2  |
| 6755973   | Lin7c         | lin 7 homolog c                                                       | 2  | 5  | 3  |
| 30424607  | Lin52         | lin-52 homolog                                                        | 1  | 0  | 0  |
| 13277380  | Lias          | lipoic acid synthetase                                                | 0  | 4  | 0  |
| 123701962 | Lmbrd1        | liver regeneration p-53 related protein                               | 1  | 0  | 0  |
| 257743039 | Ldha          | L-lactate dehydrogenase A isoform 1                                   | 17 | 2  | 2  |
| 31982520  | Acadl         | long-chain acyl-CoA dehydrogenase                                     | 14 | 1  | 2  |
| 113195700 | Ldlr          | low density lipoprotein receptor                                      | 1  | 0  | 1  |
| 124494256 | Lrp1          | low density lipoprotein receptor-related protein 1                    | 2  | 0  | 0  |
| 124487372 | Lrp2          | low density lipoprotein receptor-related protein 2                    | 45 | 4  | 8  |
| 124286870 | Lrp8          | low density lipoprotein receptor-related protein 8 isoform 1          | 1  | 1  | 2  |
| 63999380  | Lrpap1        | low density lipoprotein receptor-related protein associated protein 1 | 4  | 0  | 0  |
| 117956399 | Lrba          | LPS-responsive beige-like anchor isoform alpha                        | 35 | 3  | 8  |
| 31711990  | Lsm12         | LSM12 homolog                                                         | 0  | 3  | 0  |
| 23956156  | Lsm14a        | LSM14 homolog A                                                       | 1  | 2  | 0  |
| 13385806  | Lsm3          | LSM3 homolog, U6 small nuclear RNA associated                         | 2  | 3  | 1  |

|           |               |                                                        |    |    |    |
|-----------|---------------|--------------------------------------------------------|----|----|----|
| 159032056 | Lsm4          | LSM4 homolog, U6 small nuclear RNA associated          | 1  | 3  | 1  |
| 13384942  | Lsm5          | LSM5 homolog, U6 small nuclear RNA associated          | 0  | 1  | 0  |
| 300797601 | Lsm6          | LSM6 homolog, U6 small nuclear RNA associated          | 2  | 4  | 1  |
| 13384714  | Lsm7          | LSM7 homolog, U6 small nuclear RNA associated          | 3  | 3  | 0  |
| 114158677 | Luc7l         | Luc7 homolog ( <i>S. cerevisiae</i> )-like isoform 1   | 1  | 0  | 1  |
| 283806685 | Luc7l2        | LUC7-like 2                                            | 1  | 3  | 2  |
| 158937329 | Lnp           | lunapark isoform a                                     | 2  | 1  | 0  |
| 188219567 | Lyar          | Ly1 antibody reactive clone                            | 2  | 9  | 0  |
| 31982233  | Mtdh          | LYRIC                                                  | 3  | 0  | 0  |
| 26006857  | Kdm4b         | lysine (K)-specific demethylase 4B                     | 0  | 2  | 0  |
| 198386326 | Lpgat1        | lysophosphatidylglycerol acyltransferase 1 isoform 2   | 1  | 0  | 1  |
| 6678760   | Lypla1        | lysophospholipase 1                                    | 2  | 0  | 0  |
| 7242156   | Lypla2        | lysophospholipase 2                                    | 1  | 0  | 0  |
| 227496223 | Lyplal1       | lysophospholipase-like 1                               | 2  | 0  | 0  |
| 113195678 | Lamp1         | lysosomal membrane glycoprotein 1                      | 6  | 0  | 0  |
| 63054837  | Lamp2         | lysosomal membrane glycoprotein 2 isoform 1            | 5  | 0  | 0  |
| 195963321 | Kars          | lysyl-tRNA synthetase isoform 2                        | 14 | 4  | 0  |
| 21312048  | Mphosph6      | M phase phosphoprotein 6                               | 0  | 5  | 1  |
| 160707919 | Mfsd6         | macrophage MHC receptor 2 isoform 1                    | 1  | 0  | 0  |
| 6754696   | Mif           | macrophage migration inhibitory factor                 | 2  | 1  | 1  |
| 31543224  | Smad4         | MAD homolog 4                                          | 0  | 2  | 0  |
| 31543218  | Mad2l1        | MAD2 mitotic arrest deficient-like 1                   | 0  | 7  | 1  |
| 254826797 | Mad2l1bp      | MAD2L1 binding protein                                 | 0  | 3  | 0  |
| 12963595  | Ndn12         | mage-g1 protein                                        | 0  | 1  | 1  |
| 27229238  | Mgrn1         | mahogunin, ring finger 1                               | 2  | 0  | 0  |
| 21313266  | Mfsd1         | major facilitator superfamily domain containing 1      | 1  | 0  | 0  |
| 21312422  | Nat13         | Mak3p homolog                                          | 2  | 8  | 0  |
| 30725780  | Mal2          | MAL2 proteolipid protein                               | 1  | 1  | 1  |
| 254540027 | Mdh1          | malate dehydrogenase 1, NAD (soluble)                  | 11 | 0  | 0  |
| 31982186  | Mdh2          | malate dehydrogenase 2, NAD (mitochondrial)            | 18 | 16 | 7  |
| 188497650 | Mlec          | malectin                                               | 6  | 0  | 2  |
| 21703972  | Me2           | malic enzyme 2, NAD(+)-dependent, mitochondrial        | 10 | 0  | 0  |
| 21312175  | Mcts1         | malignant T cell amplified sequence 1                  | 0  | 6  | 0  |
| 13384966  | Mcts2         | malignant T cell amplified sequence 2                  | 0  | 3  | 0  |
| 71725343  | Mcat          | malonyl CoA:ACP acyltransferase (mitochondrial)        | 1  | 1  | 0  |
| 31560090  | Plbd2         | mannose-6-phosphate protein p76                        | 5  | 0  | 0  |
| 13385312  | M6prbp1       | mannose-6-phosphate receptor binding protein 1         | 8  | 0  | 1  |
| 14916479  | M6pr          | mannose-6-phosphate receptor, cation dependent         | 4  | 0  | 0  |
| 31981340  | Mpdu1         | mannose-P-dolichol utilization defect 1                | 3  | 0  | 0  |
| 71534295  | Man1b1        | mannosidase, alpha, class 1B, member 1                 | 0  | 0  | 2  |
| 113195690 | Man2b1        | mannosidase, alpha, class 2B, member 1                 | 2  | 2  | 0  |
| 158533990 | Manba         | mannosidase, beta A, lysosomal                         | 9  | 16 | 0  |
| 254540070 | Manbal        | mannosidase, beta A, lysosomal-like                    | 1  | 0  | 0  |
| 22122521  | Mgat2         | mannoside acetylglucosaminyltransferase 2              | 0  | 1  | 0  |
| 31981106  | Mogs          | mannosyl-oligosaccharide glucosidase                   | 5  | 1  | 2  |
| 45544580  | Mapkapk2      | MAP kinase-activated protein kinase 2                  | 1  | 0  | 0  |
| 122937363 | Mark2         | MAP/microtubule affinity-regulating kinase 2 isoform 1 | 3  | 4  | 2  |
| 251823812 | Mark3         | MAP/microtubule affinity-regulating kinase 3 isoform 2 | 1  | 1  | 0  |
| 21703882  | Mbip          | MAP3K12 binding inhibitory protein 1                   | 0  | 3  | 0  |
| 21312626  | 2400003C14Rik | MAPK activating protein PM28                           | 0  | 2  | 0  |
| 295148182 | Madd          | MAP-kinase activating death domain                     | 0  | 2  | 0  |
| 6754706   | Marcks1       | MARCKS-like 1                                          | 1  | 0  | 0  |
| 57222238  | Bud31         | maternal G10 transcript                                | 0  | 4  | 2  |
| 25141233  | Matr3         | matrin 3                                               | 4  | 24 | 31 |

|           |          |                                                                                |    |    |    |
|-----------|----------|--------------------------------------------------------------------------------|----|----|----|
| 7363445   | St14     | matriptase                                                                     | 6  | 0  | 0  |
| 226051848 | Max      | Max protein isoform 1                                                          | 0  | 4  | 0  |
| 20070410  | Med10    | mediator complex subunit 10                                                    | 0  | 5  | 0  |
| 125628662 | Med12    | mediator complex subunit 12                                                    | 0  | 9  | 0  |
| 132626693 | Mdc1     | mediator of DNA damage checkpoint 1                                            | 0  | 10 | 1  |
| 27754138  | Med11    | mediator of RNA polymerase II transcription, subunit 11 homolog                | 0  | 3  | 1  |
| 21313064  | Med18    | mediator of RNA polymerase II transcription, subunit 18 homolog                | 0  | 3  | 0  |
| 21313194  | Med19    | mediator of RNA polymerase II transcription, subunit 19                        | 0  | 2  | 0  |
| 56119162  | Med31    | mediator of RNA polymerase II transcription, subunit 31 homolog                | 0  | 2  | 1  |
| 114155155 | Med8     | mediator of RNA polymerase II transcription, subunit 8 homolog isoform 1       | 0  | 1  | 0  |
| 6680618   | Acadm    | medium-chain acyl-CoA dehydrogenase                                            | 17 | 5  | 1  |
| 9055282   | Mre11a   | meiotic recombination 11 homolog A                                             | 0  | 10 | 0  |
| 11096332  | Myg1     | melanocyte proliferating gene 1                                                | 2  | 0  | 0  |
| 9789935   | Maged1   | melanoma antigen family D, 1                                                   | 0  | 1  | 0  |
| 124001582 | Mia3     | melanoma inhibitory activity 3                                                 | 7  | 0  | 0  |
| 53759066  | ORF61    | membralin                                                                      | 2  | 0  | 0  |
| 134031999 | Magi1    | membrane associated guanylate kinase, WW and PDZ domain containing 1 isoform c | 0  | 2  | 2  |
| 226823238 | Magi3    | membrane associated guanylate kinase, WW and PDZ domain containing 3 isoform 2 | 0  | 0  | 1  |
| 23956314  | Mboat1   | membrane bound O-acyltransferase domain containing 1                           | 1  | 0  | 0  |
| 22122803  | Mmg1     | membrane magnesium transporter 1                                               | 2  | 0  | 0  |
| 58037337  | Paqr5    | membrane progesterin receptor gamma                                            | 1  | 0  | 0  |
| 9625023   | Mpp5     | membrane protein, palmitoylated 3 (MAGUK p55 subfamily member 5)               | 0  | 0  | 4  |
| 257900520 | Mpp6     | membrane protein, palmitoylated 3 (MAGUK p55 subfamily member 6)               | 0  | 2  | 1  |
| 239051572 | Mpp7     | membrane protein, palmitoylated 7 isoform 1                                    | 13 | 13 | 2  |
| 257095992 | Pdzk1ip1 | membrane-associated protein 17                                                 | 1  | 0  | 0  |
| 256773303 | March5   | membrane-associated ring finger (C3HC4) 5                                      | 3  | 0  | 1  |
| 10181210  | March7   | membrane-associated ring finger (C3HC4) 7                                      | 1  | 0  | 0  |
| 89363038  | Mnat1    | menage a trois 1                                                               | 0  | 1  | 0  |
| 110625813 | Manf     | mesencephalic astrocyte-derived neurotrophic factor                            | 0  | 9  | 0  |
| 228480219 | Mesdc2   | mesoderm development candidate 2                                               | 3  | 0  | 0  |
| 9256568   | Msln     | mesothelin                                                                     | 1  | 0  | 0  |
| 7305285   | Mt1      | metallothionein 1                                                              | 1  | 0  | 0  |
| 33468863  | Mt2      | metallothionein 2                                                              | 0  | 1  | 0  |
| 91598896  | Mta1     | metastasis associated 1                                                        | 0  | 3  | 5  |
| 283806541 | Mta3     | metastasis associated 3                                                        | 0  | 7  | 0  |
| 51491880  | Mta2     | metastasis-associated gene family, member 2                                    | 1  | 15 | 10 |
| 241982742 | Mtx1     | metaxin 1 isoform 1                                                            | 7  | 0  | 9  |
| 228480241 | Mtx2     | metaxin 2                                                                      | 6  | 0  | 9  |
| 21704144  | Mat2a    | methionine adenosyltransferase II, alpha                                       | 3  | 0  | 0  |
| 313482787 | Mat2b    | methionine adenosyltransferase II, beta                                        | 3  | 0  | 0  |
| 9789873   | Metap2   | methionine aminopeptidase 2                                                    | 1  | 2  | 0  |
| 51491852  | Mars     | methionine-tRNA synthetase                                                     | 5  | 2  | 0  |
| 28202007  | Metap1   | methionyl aminopeptidase 1                                                     | 0  | 6  | 0  |
| 126517469 | Mecp2    | methyl CpG binding protein 2 isoform 2                                         | 0  | 12 | 2  |
| 157817372 | Mbd1     | methyl-CpG binding domain protein 1                                            | 0  | 1  | 0  |
| 218931229 | Mbd2     | methyl-CpG binding domain protein 2                                            | 2  | 3  | 2  |

|           |               |                                                                       |    |    |    |
|-----------|---------------|-----------------------------------------------------------------------|----|----|----|
| 7305261   | Mbd3          | methyl-CpG binding domain protein 3                                   | 0  | 5  | 3  |
| 119433655 | Mbd5          | methyl-CpG binding domain protein 5                                   | 1  | 0  | 0  |
| 186700620 | Mccc1         | methylcrotonoyl-Coenzyme A carboxylase 1 (alpha)                      | 4  | 0  | 0  |
| 73622267  | Mccc2         | methylcrotonoyl-Coenzyme A carboxylase 2 (beta)                       | 8  | 1  | 0  |
| 283135114 | Mthfd1l       | methylenetetrahydrofolate dehydrogenase (NADP+ dependent) 1-like      | 14 | 14 | 1  |
| 261878543 | Mthfd1        | methylenetetrahydrofolate dehydrogenase 1                             | 21 | 10 | 0  |
| 6678952   | Mthfd2        | methylenetetrahydrofolate dehydrogenase 2                             | 0  | 1  | 0  |
| 148540106 | Mut           | methylmalonyl-Coenzyme A mutase                                       | 12 | 0  | 0  |
| 21312938  | Mett10d       | methyltransferase 10 domain containing                                | 1  | 0  | 0  |
| 27229243  | Mett5d1       | methyltransferase 5 domain containing 1                               | 1  | 1  | 0  |
| 13385728  | Mfap1a        | microfibrillar-associated protein 1A                                  | 1  | 5  | 5  |
| 226529982 | Morc2a        | microorchidia 2A isoform 2                                            | 0  | 1  | 1  |
| 255003723 | Morc3         | microorchidia 3                                                       | 0  | 1  | 1  |
| 13385010  | Mgst3         | microsomal glutathione S-transferase 3                                | 1  | 0  | 4  |
| 31980615  | Mcrs1         | microspherule protein 1                                               | 0  | 2  | 0  |
| 312433957 | Macf1         | microtubule-actin crosslinking factor 1                               | 8  | 33 | 3  |
| 148747189 | Mtap4         | microtubule-associated protein 4                                      | 6  | 4  | 0  |
| 124486997 | Mtap9         | microtubule-associated protein 9                                      | 1  | 1  | 0  |
| 7106301   | Mapre1        | microtubule-associated protein, RP/EB family, member 1                | 2  | 7  | 0  |
| 109627648 | Mcm3ap        | minichromosome maintenance complex component 3 associated protein     | 0  | 1  | 1  |
| 255918149 | Mcm4          | minichromosome maintenance complex component 4                        | 20 | 9  | 4  |
| 6678832   | Mcm6          | minichromosome maintenance complex component 6                        | 28 | 5  | 5  |
| 10242373  | Mcm7          | minichromosome maintenance complex component 7                        | 28 | 7  | 8  |
| 172088119 | Mcm2          | minichromosome maintenance deficient 2 mitotin                        | 29 | 8  | 4  |
| 33859484  | Mcm3          | minichromosome maintenance deficient 3                                | 33 | 12 | 3  |
| 112293273 | Mcm5          | minichromosome maintenance deficient 5, cell division cycle 46        | 23 | 10 | 7  |
| 31542008  | Mcm8          | minichromosome maintenance deficient 8                                | 0  | 0  | 1  |
| 30794474  | Mrps7         | mitochondrial ribosomal protein S7                                    | 3  | 2  | 1  |
| 13385012  | Magmas        | mitochondria-associated granulocyte macrophage CSF signaling molecule | 3  | 2  | 2  |
| 329755292 | Mavs          | mitochondrial antiviral signaling protein                             | 4  | 0  | 3  |
| 31980648  | Atp5b         | mitochondrial ATP synthase beta subunit                               | 36 | 14 | 23 |
| 158749545 | Slc25a40      | mitochondrial carrier family protein                                  | 1  | 0  | 0  |
| 9845273   | Mtch1         | mitochondrial carrier homolog 1                                       | 2  | 0  | 6  |
| 9790055   | Mtch2         | mitochondrial carrier homolog 2                                       | 8  | 1  | 11 |
| 281332113 | Polrmt        | mitochondrial DNA-directed RNA polymerase                             | 0  | 1  | 0  |
| 34536827  | Gpam          | mitochondrial glycerol 3-phosphate acyltransferase                    | 0  | 1  | 0  |
| 38490690  | Iars2         | mitochondrial isoleucine tRNA synthetase                              | 9  | 0  | 0  |
| 9790049   | 2610024G14Rik | mitochondrial nitric oxide synthase                                   | 0  | 1  | 0  |
| 28077029  | Pck2          | mitochondrial phosphoenolpyruvate carboxykinase 2                     | 12 | 0  | 3  |
| 95113671  | Pmpcb         | mitochondrial processing peptidase beta subunit                       | 2  | 0  | 0  |
| 254039729 | Rhot1         | mitochondrial Rho 1 isoform 1                                         | 3  | 0  | 1  |
| 84875532  | Mrpl1         | mitochondrial ribosomal protein L1 isoform 2                          | 8  | 5  | 1  |
| 13385658  | Mrpl10        | mitochondrial ribosomal protein L10                                   | 3  | 2  | 1  |
| 13384980  | Mrpl11        | mitochondrial ribosomal protein L11                                   | 5  | 7  | 0  |
| 22164792  | Mrpl12        | mitochondrial ribosomal protein L12                                   | 4  | 5  | 2  |
| 21312936  | Mrpl13        | mitochondrial ribosomal protein L13                                   | 0  | 3  | 0  |
| 21312028  | Mrpl14        | mitochondrial ribosomal protein L14                                   | 2  | 2  | 0  |
| 33468983  | Mrpl15        | mitochondrial ribosomal protein L15                                   | 2  | 0  | 0  |
| 19424352  | Mrpl16        | mitochondrial ribosomal protein L16                                   | 1  | 0  | 1  |
| 13384658  | Mrpl17        | mitochondrial ribosomal protein L17                                   | 0  | 1  | 0  |

|           |         |                                               |   |   |   |
|-----------|---------|-----------------------------------------------|---|---|---|
| 13385808  | Mrpl18  | mitochondrial ribosomal protein L18           | 0 | 6 | 0 |
| 13385976  | Mrpl19  | mitochondrial ribosomal protein L19           | 1 | 1 | 0 |
| 13384660  | Mrpl2   | mitochondrial ribosomal protein L2            | 1 | 0 | 1 |
| 20270194  | Mrpl20  | mitochondrial ribosomal protein L20           | 2 | 2 | 0 |
| 31982032  | Mrpl21  | mitochondrial ribosomal protein L21           | 2 | 4 | 0 |
| 262263310 | Mrpl22  | mitochondrial ribosomal protein L22           | 2 | 5 | 0 |
| 6755352   | Mrpl23  | mitochondrial ribosomal protein L23           | 5 | 6 | 0 |
| 16716447  | Mrpl27  | mitochondrial ribosomal protein L27           | 4 | 2 | 0 |
| 31981470  | Mrpl3   | mitochondrial ribosomal protein L3            | 1 | 0 | 0 |
| 21312302  | Mrpl30  | mitochondrial ribosomal protein L30           | 0 | 1 | 0 |
| 16716449  | Mrpl34  | mitochondrial ribosomal protein L34           | 2 | 1 | 0 |
| 22128625  | Mrpl37  | mitochondrial ribosomal protein L37           | 0 | 1 | 0 |
| 124430535 | Mrpl38  | mitochondrial ribosomal protein L38           | 3 | 2 | 0 |
| 31560438  | Mrpl39  | mitochondrial ribosomal protein L39           | 3 | 1 | 0 |
| 119508437 | Mrpl4   | mitochondrial ribosomal protein L4            | 1 | 3 | 0 |
| 255003746 | Mrpl40  | mitochondrial ribosomal protein L40           | 2 | 2 | 0 |
| 113461980 | Mrpl41  | mitochondrial ribosomal protein L41           | 1 | 2 | 0 |
| 17298676  | Mrpl43  | mitochondrial ribosomal protein L43           | 0 | 1 | 0 |
| 124487075 | Mrpl44  | mitochondrial ribosomal protein L44           | 4 | 2 | 1 |
| 12963643  | Mrpl46  | mitochondrial ribosomal protein L46           | 1 | 2 | 1 |
| 29826332  | Mrpl47  | mitochondrial ribosomal protein L47           | 1 | 4 | 0 |
| 148368964 | Mrpl48  | mitochondrial ribosomal protein L48           | 1 | 3 | 0 |
| 13385752  | Mrpl49  | mitochondrial ribosomal protein L49           | 3 | 3 | 0 |
| 13385050  | Mrpl51  | mitochondrial ribosomal protein L51           | 1 | 1 | 1 |
| 21313040  | Mrpl53  | mitochondrial ribosomal protein L53           | 3 | 3 | 0 |
| 21313400  | Mrpl55  | mitochondrial ribosomal protein L55           | 2 | 1 | 1 |
| 29789253  | Mrpl9   | mitochondrial ribosomal protein L9            | 2 | 2 | 0 |
| 226246598 | Mrps10  | mitochondrial ribosomal protein S10 isoform 3 | 4 | 5 | 0 |
| 13384894  | Mrps14  | mitochondrial ribosomal protein S14           | 1 | 1 | 0 |
| 48526512  | Mrps15  | mitochondrial ribosomal protein S15           | 5 | 1 | 0 |
| 13384844  | Mrps16  | mitochondrial ribosomal protein S16           | 2 | 0 | 0 |
| 13384854  | Mrps17  | mitochondrial ribosomal protein S17           | 0 | 2 | 0 |
| 17505206  | Mrps18a | mitochondrial ribosomal protein S18A          | 0 | 1 | 0 |
| 23956152  | Mrps18b | mitochondrial ribosomal protein S18B          | 0 | 1 | 0 |
| 58037129  | Mrps18c | mitochondrial ribosomal protein S18C          | 0 | 1 | 0 |
| 260593698 | Mrps2   | mitochondrial ribosomal protein S2            | 2 | 3 | 0 |
| 17505220  | Mrps21  | mitochondrial ribosomal protein S21           | 2 | 1 | 0 |
| 27228982  | Mrps23  | mitochondrial ribosomal protein S23           | 3 | 7 | 1 |
| 13385578  | Mrps24  | mitochondrial ribosomal protein S24           | 1 | 2 | 0 |
| 31981257  | Mrps25  | mitochondrial ribosomal protein S25           | 1 | 1 | 0 |
| 46402169  | Mrps26  | mitochondrial ribosomal protein S26           | 4 | 4 | 0 |
| 50980303  | Mrps27  | mitochondrial ribosomal protein S27           | 1 | 0 | 0 |
| 254587936 | Mrps28  | mitochondrial ribosomal protein S28           | 2 | 2 | 1 |
| 29789128  | Mrps30  | mitochondrial ribosomal protein S30           | 2 | 1 | 0 |
| 10181116  | Mrps31  | mitochondrial ribosomal protein S31           | 3 | 3 | 1 |
| 33859564  | Mrps33  | mitochondrial ribosomal protein S33 isoform 1 | 1 | 1 | 0 |
| 13385670  | Mrps34  | mitochondrial ribosomal protein S34           | 3 | 2 | 0 |
| 148235701 | Mrps35  | mitochondrial ribosomal protein S35           | 3 | 3 | 0 |
| 298286543 | Mrps36  | mitochondrial ribosomal protein S36           | 1 | 0 | 0 |
| 17157985  | Mrps5   | mitochondrial ribosomal protein S5            | 2 | 1 | 0 |
| 23956244  | Mrps6   | mitochondrial ribosomal protein S6            | 3 | 1 | 0 |
| 169790909 | Mrps9   | mitochondrial ribosomal protein S9            | 4 | 0 | 1 |
| 21312752  | Mrrf    | mitochondrial ribosome recycling factor       | 1 | 8 | 0 |

|           |               |                                                                  |    |    |    |
|-----------|---------------|------------------------------------------------------------------|----|----|----|
| 29789289  | Echs1         | mitochondrial short-chain enoyl-coenzyme A hydratase 1           | 8  | 6  | 1  |
| 110625866 | Mtif2         | mitochondrial translational initiation factor 2                  | 1  | 1  | 0  |
| 33859811  | Hadha         | mitochondrial trifunctional protein, alpha subunit               | 31 | 18 | 22 |
| 21704100  | Hadhb         | mitochondrial trifunctional protein, beta subunit                | 15 | 9  | 7  |
| 244793488 | Mfn1          | mitofusin 1                                                      | 1  | 0  | 0  |
| 21489933  | Mapk3         | mitogen activated protein kinase 3                               | 4  | 0  | 1  |
| 89257354  | Map3k2        | mitogen activated protein kinase kinase kinase 2                 | 0  | 1  | 0  |
| 93102421  | Map3k4        | mitogen activated protein kinase kinase kinase 4                 | 2  | 0  | 0  |
| 84579909  | Mapk1         | mitogen-activated protein kinase 1                               | 6  | 7  | 0  |
| 226246627 | Mapk13        | mitogen-activated protein kinase 13                              | 0  | 3  | 0  |
| 270341386 | Mapk14        | mitogen-activated protein kinase 14                              | 1  | 0  | 0  |
| 6678794   | Map2k1        | mitogen-activated protein kinase kinase 1                        | 2  | 0  | 0  |
| 6754624   | Map2k5        | mitogen-activated protein kinase kinase 5                        | 0  | 0  | 1  |
| 31543234  | Map3k11       | mitogen-activated protein kinase kinase kinase 11                | 1  | 0  | 0  |
| 171846249 | Map3k5        | mitogen-activated protein kinase kinase kinase 5                 | 0  | 1  | 0  |
| 124486875 | Map4k3        | mitogen-activated protein kinase kinase kinase kinase 3          | 0  | 1  | 0  |
| 77736537  | Map4k5        | mitogen-activated protein kinase kinase kinase kinase 5          | 0  | 3  | 0  |
| 88014564  | Mad111        | mitotic arrest deficient 1-like 1                                | 0  | 10 | 1  |
| 224809384 | Mki67ip       | Mki67 (FHA domain) interacting nucleolar phosphoprotein          | 0  | 0  | 5  |
| 62412947  | Mobk11a       | MOB1, Mps One Binder kinase activator-like 1A                    | 1  | 0  | 0  |
| 19526848  | Mosc2         | MOCO sulphurase C-terminal domain containing 2                   | 5  | 0  | 4  |
| 62243852  | Sltm          | modulator of estrogen induced transcription isoform a            | 0  | 11 | 1  |
| 70778915  | Msn           | moesin                                                           | 5  | 12 | 0  |
| 164664484 | Mocs2         | molybdopterin synthase isoform Mocs2B                            | 0  | 1  | 0  |
| 253683424 | Mon2          | MON2 homolog isoform 3                                           | 1  | 0  | 3  |
| 255759902 | Maoa          | monoamine oxidase A                                              | 6  | 0  | 2  |
| 85540473  | Morf4l1       | mortality factor 4 like 1 isoform b                              | 0  | 11 | 0  |
| 170295836 | Trim59        | mouse RING finger 1                                              | 1  | 0  | 0  |
| 68303650  | Mphosph10     | M-phase phosphoprotein 10 (U3 small nucleolar ribonucleoprotein) | 1  | 1  | 6  |
| 146134497 | Mpnd          | MPN domain containing                                            | 0  | 2  | 0  |
| 110625965 | 1600027N09Rik | MRG-binding protein                                              | 0  | 2  | 0  |
| 171906591 | Mterfd1       | MTERF domain containing 1                                        | 0  | 1  | 0  |
| 7305293   | Muc1          | mucin 1, transmembrane                                           | 1  | 1  | 5  |
| 167736365 | Muc4          | mucin 4                                                          | 7  | 0  | 0  |
| 16716463  | Mcoln1        | mucopolipin 1                                                    | 0  | 0  | 1  |
| 28827786  | Mcf2          | multiple coagulation factor deficiency 2 isoform 1               | 1  | 0  | 0  |
| 270309153 | Men1          | multiple endocrine neoplasia 1                                   | 0  | 5  | 0  |
| 17157989  | Msi2          | Musashi homolog 2                                                | 6  | 4  | 4  |
| 37537520  | Mrt4          | muscle protein684                                                | 0  | 2  | 1  |
| 46411182  | Mbnl1         | muscleblind-like 1                                               | 1  | 4  | 0  |
| 7305271   | Mkin1         | muskelin 1, intracellular mediator containing kelch motifs       | 1  | 0  | 0  |
| 20532342  | Muted         | muted                                                            | 1  | 0  | 0  |
| 6678938   | Msh2          | mutS homolog 2                                                   | 11 | 0  | 1  |
| 6754744   | Msh6          | mutS homolog 6                                                   | 4  | 0  | 0  |
| 31982724  | Mybbp1a       | MYB binding protein (P160) 1a                                    | 1  | 78 | 35 |
| 256355182 | Mina          | myc induced nuclear antigen                                      | 1  | 1  | 0  |
| 114155153 | Maz           | MYC-associated zinc finger protein                               | 0  | 1  | 0  |
| 244790095 | Myef2         | myelin basic protein expression factor 2, repressor isoform 2    | 0  | 12 | 8  |
| 49457857  | Mpz1          | myelin protein zero-like 1 isoform a                             | 0  | 0  | 1  |
| 6678824   | Mcl1          | myeloid cell leukemia sequence 1                                 | 1  | 0  | 0  |

|           |               |                                                                                                 |    |    |     |
|-----------|---------------|-------------------------------------------------------------------------------------------------|----|----|-----|
| 6678978   | Myd116        | myeloid differentiation primary response gene 116                                               | 1  | 0  | 0   |
| 145587092 | Mlit4         | myeloid/lymphoid or mixed lineage-leukemia translocation to 4 homolog                           | 3  | 7  | 4   |
| 11612511  | Mlit1         | myeloid/lymphoid or mixed-lineage leukemia (trithorax homolog, Drosophila); translocated to, 1  | 0  | 0  | 1   |
| 47271507  | Mlit10        | myeloid/lymphoid or mixed-lineage leukemia (trithorax homolog, Drosophila); translocated to, 10 | 0  | 0  | 1   |
| 124486682 | Mli1          | myeloid/lymphoid or mixed-lineage leukemia 1                                                    | 0  | 2  | 0   |
| 124487063 | Mli3          | myeloid/lymphoid or mixed-lineage leukemia 3                                                    | 0  | 2  | 0   |
| 148271073 | Myadm         | myeloid-associated differentiation marker                                                       | 1  | 0  | 2   |
| 76253934  | Mef2a         | myocyte enhancer factor 2A                                                                      | 0  | 1  | 0   |
| 12963757  | Isyna1        | myo-inositol 1-phosphate synthase A1                                                            | 4  | 0  | 0   |
| 33598964  | Myh10         | myosin heavy chain 10, non-muscle                                                               | 19 | 11 | 57  |
| 240120042 | Myo1b         | myosin IB isoform 2                                                                             | 0  | 1  | 3   |
| 124494244 | Myo1c         | myosin IC isoform a                                                                             | 1  | 14 | 40  |
| 118026911 | Myo1d         | myosin ID                                                                                       | 1  | 0  | 24  |
| 68299824  | Myo1e         | myosin IE                                                                                       | 0  | 0  | 3   |
| 215272384 | Myo9b         | myosin IXb isoform 1                                                                            | 1  | 1  | 0   |
| 71037403  | 2900073G15Rik | myosin light chain, regulatory B-like                                                           | 5  | 9  | 7   |
| 115511052 | Myo5a         | myosin Va                                                                                       | 0  | 1  | 2   |
| 46399202  | Myo5b         | myosin Vb                                                                                       | 0  | 0  | 5   |
| 124486759 | Myo5c         | myosin VC                                                                                       | 1  | 2  | 11  |
| 261823961 | Myo6          | myosin VI                                                                                       | 11 | 18 | 39  |
| 22094119  | Myo18a        | myosin XVIIIa                                                                                   | 1  | 36 | 2   |
| 29336026  | Myh14         | myosin, heavy polypeptide 14                                                                    | 9  | 5  | 7   |
| 114326446 | Myh9          | myosin, heavy polypeptide 9, non-muscle isoform 1                                               | 85 | 55 | 106 |
| 21728376  | Myl12b        | myosin, light chain 12B, regulatory                                                             | 1  | 1  | 1   |
| 33620739  | Myl6          | myosin, light polypeptide 6, alkali, smooth muscle and non-muscle                               | 1  | 8  | 9   |
| 126157499 | Mylk          | myosin, light polypeptide kinase                                                                | 0  | 20 | 2   |
| 6679961   | Mtpn          | myotrophin                                                                                      | 1  | 0  | 0   |
| 224994246 | Mttr11        | myotubularin related protein 11                                                                 | 0  | 0  | 1   |
| 33563378  | Mttr9         | myotubularin related protein 9                                                                  | 1  | 0  | 1   |
| 6678768   | Marcks        | myristoylated alanine rich protein kinase C substrate                                           | 6  | 0  | 0   |
| 124487239 | Myst3         | MYST histone acetyltransferase (monocytic leukemia) 3                                           | 1  | 0  | 0   |
| 303521989 | Myst2         | MYST histone acetyltransferase 2                                                                | 0  | 1  | 4   |
| 21450277  | Atp1a1        | Na <sup>+</sup> /K <sup>+</sup> -ATPase alpha 1 subunit                                         | 24 | 6  | 12  |
| 6753138   | Atp1b1        | Na <sup>+</sup> /K <sup>+</sup> -ATPase beta 1 subunit                                          | 9  | 0  | 4   |
| 168693635 | Naga          | N-acetyl galactosaminidase, alpha                                                               | 10 | 27 | 2   |
| 84579827  | Gnptab        | N-acetylglucosamine-1-phosphate transferase                                                     | 0  | 1  | 1   |
| 16716467  | Nans          | N-acetylneuraminic acid synthase                                                                | 3  | 0  | 0   |
| 23346561  | Nat10         | N-acetyltransferase 10                                                                          | 1  | 22 | 7   |
| 9790019   | Asah1         | N-acylsphingosine amidohydrolase 1                                                              | 17 | 11 | 5   |
| 31982437  | Nsdhl         | NAD(P) dependent steroid dehydrogenase-like                                                     | 11 | 0  | 0   |
| 94400773  | Nqo1          | NAD(P)H dehydrogenase, quinone 1                                                                | 7  | 0  | 2   |
| 13195624  | Ndufa10       | NADH dehydrogenase (ubiquinone) 1 alpha subcomplex 10                                           | 9  | 1  | 10  |
| 226437665 | Ndufa11       | NADH dehydrogenase (ubiquinone) 1 alpha subcomplex 11                                           | 2  | 0  | 2   |
| 9506911   | Ndufa1        | NADH dehydrogenase (ubiquinone) 1 alpha subcomplex, 1                                           | 0  | 0  | 1   |
| 12963633  | Ndufa13       | NADH dehydrogenase (ubiquinone) 1 alpha subcomplex, 13                                          | 3  | 0  | 4   |
| 31981600  | Ndufa2        | NADH dehydrogenase (ubiquinone) 1 alpha subcomplex, 2                                           | 4  | 0  | 1   |



|           |               |                                                                        |    |    |    |
|-----------|---------------|------------------------------------------------------------------------|----|----|----|
| 33563266  | Ndufa4        | NADH dehydrogenase (ubiquinone) 1 alpha subcomplex, 4                  | 4  | 2  | 4  |
| 13386100  | Ndufa5        | NADH dehydrogenase (ubiquinone) 1 alpha subcomplex, 5                  | 5  | 2  | 3  |
| 13385492  | Ndufa6        | NADH dehydrogenase (ubiquinone) 1 alpha subcomplex, 6 (B14)            | 3  | 0  | 2  |
| 12963571  | Ndufa7        | NADH dehydrogenase (ubiquinone) 1 alpha subcomplex, 7 (B14.5a)         | 4  | 0  | 3  |
| 21312012  | Ndufa8        | NADH dehydrogenase (ubiquinone) 1 alpha subcomplex, 8                  | 4  | 6  | 7  |
| 254692859 | Ndufa9        | NADH dehydrogenase (ubiquinone) 1 alpha subcomplex, 9                  | 12 | 1  | 16 |
| 13385054  | Ndufb3        | NADH dehydrogenase (ubiquinone) 1 beta subcomplex 3                    | 1  | 0  | 1  |
| 13385558  | Ndufb8        | NADH dehydrogenase (ubiquinone) 1 beta subcomplex 8                    | 2  | 0  | 3  |
| 58037109  | Ndufb10       | NADH dehydrogenase (ubiquinone) 1 beta subcomplex, 10                  | 5  | 4  | 9  |
| 27754144  | Ndufb5        | NADH dehydrogenase (ubiquinone) 1 beta subcomplex, 5                   | 2  | 1  | 3  |
| 84781779  | Ndufb6        | NADH dehydrogenase (ubiquinone) 1 beta subcomplex, 6                   | 2  | 1  | 2  |
| 13385322  | Ndufb7        | NADH dehydrogenase (ubiquinone) 1 beta subcomplex, 7                   | 4  | 0  | 4  |
| 29789148  | Ndufb9        | NADH dehydrogenase (ubiquinone) 1 beta subcomplex, 9                   | 2  | 0  | 8  |
| 27754007  | Ndufab1       | NADH dehydrogenase (ubiquinone) 1, alpha/beta subcomplex, 1            | 6  | 0  | 4  |
| 18859597  | Ndufc2        | NADH dehydrogenase (ubiquinone) 1, subcomplex unknown, 2               | 7  | 0  | 3  |
| 229892322 | Ndufs1        | NADH dehydrogenase (ubiquinone) Fe-S protein 1                         | 27 | 3  | 19 |
| 23346461  | Ndufs2        | NADH dehydrogenase (ubiquinone) Fe-S protein 2                         | 15 | 0  | 11 |
| 58037117  | Ndufs3        | NADH dehydrogenase (ubiquinone) Fe-S protein 3                         | 2  | 1  | 9  |
| 281485615 | Ndufs4        | NADH dehydrogenase (ubiquinone) Fe-S protein 4                         | 3  | 0  | 3  |
| 72004262  | Ndufs5        | NADH dehydrogenase (ubiquinone) Fe-S protein 5                         | 2  | 0  | 1  |
| 56711244  | Ndufs6        | NADH dehydrogenase (ubiquinone) Fe-S protein 6                         | 2  | 0  | 3  |
| 21312950  | Ndufs7        | NADH dehydrogenase (ubiquinone) Fe-S protein 7                         | 3  | 2  | 6  |
| 21314826  | Ndufb4        | NADH dehydrogenase 1 beta subcomplex 4                                 | 4  | 1  | 4  |
| 46195430  | Ndufs8        | NADH dehydrogenase ubiquinone Fe-S 8                                   | 3  | 1  | 6  |
| 19526814  | Ndufv1        | NADH dehydrogenase ubiquinone flavoprotein 1 precursor                 | 9  | 0  | 12 |
| 110625954 | Ndufv2        | NADH dehydrogenase ubiquinone flavoprotein 2 precursor                 | 6  | 0  | 7  |
| 21539587  | Ndufa3        | NADH-ubiquinone oxidoreductase B9 subunit                              | 1  | 0  | 2  |
| 140972309 | Ndufv3        | NADH-ubiquinone oxidoreductase flavoprotein 3 isoform 1                | 8  | 0  | 10 |
| 294997249 | Nelf          | nasal embryonic LHRH factor isoform B                                  | 0  | 1  | 0  |
| 163965357 | Naca          | nascent polypeptide-associated complex alpha subunit isoform a         | 5  | 3  | 0  |
| 62526130  | Nktr          | natural killer tumor recognition                                       | 1  | 0  | 0  |
| 28395023  | Nckap1        | NCK-associated protein 1                                               | 0  | 14 | 2  |
| 31981859  | C330016O10Rik | Nedd4 binding protein 3                                                | 0  | 0  | 1  |
| 119360354 | Nub1          | Nedd8 ultimate buster-1                                                | 4  | 0  | 0  |
| 13385392  | Napa          | N-ethylmaleimide sensitive fusion protein attachment protein alpha     | 8  | 0  | 1  |
| 56699423  | Nedd4         | neural precursor cell expressed, developmentally down-regulated gene 4 | 4  | 0  | 1  |

|           |               |                                                                                       |    |    |   |
|-----------|---------------|---------------------------------------------------------------------------------------|----|----|---|
| 167466245 | Nedd4l        | neural precursor cell expressed, developmentally down-regulated gene 4-like isoform 1 | 2  | 0  | 0 |
| 6679034   | Nedd8         | neural precursor cell expressed, developmentally down-regulated gene 8                | 2  | 0  | 0 |
| 31982836  | Npdc1         | neural proliferation, differentiation and control gene 1                              | 1  | 0  | 0 |
| 158854037 | Nbea          | neurobeachin                                                                          | 0  | 1  | 0 |
| 111154109 | Nras          | neuroblastoma ras oncogene                                                            | 6  | 5  | 3 |
| 31982775  | Nf2           | neurofibromatosis 2                                                                   | 0  | 1  | 0 |
| 58037133  | Ngdn          | neuroguidin, EIF4E binding protein                                                    | 0  | 0  | 2 |
| 56699425  | Nlgn2         | neuroligin 2                                                                          | 1  | 0  | 0 |
| 28077051  | Nln           | neurolysin                                                                            | 1  | 0  | 0 |
| 167466226 | Nav2          | neuron navigator 2 isoform 1                                                          | 1  | 0  | 0 |
| 162417959 | Ngef          | neuronal guanine nucleotide exchange factor isoform 1                                 | 0  | 1  | 0 |
| 158631246 | Ndufb11       | neuronal protein 15.6                                                                 | 2  | 0  | 2 |
| 153945724 | Nptn          | neuroplastin                                                                          | 1  | 0  | 0 |
| 6679891   | Ganab         | neutral alpha-glucosidase AB                                                          | 47 | 1  | 1 |
| 255069776 | 2310057J16Rik | Nezha isoform 2                                                                       | 0  | 1  | 0 |
| 187608797 | Nfkbil2       | NF-kappa-B inhibitor-like protein 2                                                   | 0  | 1  | 0 |
| 21312616  | Nkiras2       | NFKB inhibitor interacting Ras-like protein 2                                         | 0  | 3  | 0 |
| 58082069  | Ppp1r13l      | NFKB interacting protein 1                                                            | 1  | 0  | 0 |
| 61888900  | Thoc7         | Ngg1 interacting factor 3 like 1 binding protein 1 isoform 1                          | 0  | 7  | 0 |
| 41056093  | Nif3l1        | Ngg1 interacting factor 3-like 1                                                      | 1  | 0  | 0 |
| 84781725  | Nhp2l1        | NHP2 non-histone chromosome protein 2-like 1                                          | 2  | 13 | 9 |
| 13386120  | Nhp2          | NHP2 ribonucleoprotein homolog                                                        | 0  | 8  | 4 |
| 145386524 | Nbn           | nibrin                                                                                | 0  | 1  | 0 |
| 33469043  | Ncln          | nicalin homolog                                                                       | 4  | 0  | 1 |
| 224809376 | Ncstn         | nicastrin                                                                             | 6  | 0  | 0 |
| 260166706 | Ubap2l        | Nice-4 protein homolog isoform 2                                                      | 7  | 0  | 0 |
| 124107627 | Nek1          | NIMA-related kinase 1                                                                 | 0  | 1  | 0 |
| 125346156 | Nin           | ninein isoform 1                                                                      | 0  | 1  | 0 |
| 13385084  | Nipsnap3a     | nipsnap homolog 3B                                                                    | 1  | 0  | 0 |
| 114158672 | Nisch         | nischarin                                                                             | 1  | 0  | 0 |
| 12963555  | Nit2          | Nit protein 2                                                                         | 3  | 0  | 0 |
| 254826728 | Nosip         | nitric oxide synthase interacting protein isoform 1                                   | 0  | 3  | 0 |
| 6754856   | Nit1          | nitrilase 1                                                                           | 1  | 0  | 0 |
| 161016824 | Nfs1          | nitrogen fixation gene, yeast homolog 1                                               | 7  | 0  | 0 |
| 213688428 | Nmi           | N-mcy (and STAT) interactor                                                           | 2  | 0  | 0 |
| 21313242  | Narg1l        | NMDA receptor regulated 1-like                                                        | 1  | 0  | 0 |
| 225543482 | Narg1         | NMDA receptor-regulated gene 1                                                        | 3  | 1  | 0 |
| 34594671  | Narg2         | NMDA receptor-regulated gene 2                                                        | 0  | 1  | 0 |
| 24431937  | Nmral1        | Nmra-like family domain containing 1                                                  | 1  | 0  | 0 |
| 118150658 | Ndrp1         | N-myc downstream regulated 1                                                          | 7  | 0  | 0 |
| 255918147 | Ndrp3         | N-myc downstream regulated gene 3                                                     | 0  | 1  | 0 |
| 6679082   | Nmt1          | N-myristoyltransferase 1                                                              | 2  | 5  | 0 |
| 227908803 | Nomo1         | nodal modulator 1                                                                     | 22 | 0  | 0 |
| 295054316 | Nsun2         | NOL1/NOP2/Sun domain family, member 2                                                 | 1  | 4  | 0 |
| 255958247 | Nono          | non-POU-domain-containing, octamer binding protein                                    | 2  | 23 | 7 |
| 22165392  | Ncapd2        | non-SMC condensin I complex, subunit D2                                               | 0  | 2  | 2 |
| 169234780 | Ncapg         | non-SMC condensin I complex, subunit G                                                | 0  | 1  | 0 |
| 161016797 | Ncapd3        | non-SMC condensin II complex, subunit D3                                              | 0  | 4  | 1 |
| 34328291  | Nsmce1        | non-SMC element 1 homolog                                                             | 0  | 1  | 2 |
| 257196205 | Nsmce2        | non-SMC element 2, MMS21 homolog                                                      | 0  | 1  | 1 |
| 242246981 | Nsmce4a       | non-SMC element 4 homolog A isoform 5                                                 | 0  | 5  | 4 |

|           |          |                                                                                               |    |    |    |
|-----------|----------|-----------------------------------------------------------------------------------------------|----|----|----|
| 13384790  | Nop10    | NOP10 ribonucleoprotein homolog                                                               | 0  | 4  | 0  |
| 30519925  | Nop16    | NOP16 nucleolar protein homolog                                                               | 0  | 0  | 4  |
| 31560052  | Trp53rk  | Nori-2 protein                                                                                | 1  | 0  | 0  |
| 224967065 | Notch1   | Notch 1                                                                                       | 1  | 0  | 0  |
| 117676367 | Rrp1     | novel nuclear protein 1                                                                       | 0  | 0  | 2  |
| 158749551 | Nxt1     | NTF2-related export protein 1                                                                 | 0  | 1  | 0  |
| 125490378 | Nasp     | nuclear autoantigenic sperm protein isoform 1                                                 | 15 | 0  | 0  |
| 144922627 | AU014645 | nuclear cap binding protein subunit 1, 80kDa                                                  | 0  | 13 | 10 |
| 13386056  | Ncbp2    | nuclear cap binding protein subunit 2                                                         | 1  | 3  | 2  |
| 6754910   | Nudc     | nuclear distribution gene C homolog                                                           | 3  | 0  | 0  |
| 166197654 | Nde1     | nuclear distribution gene E homolog 1 isoform a                                               | 0  | 1  | 0  |
| 194440738 | Nfe2l1   | nuclear factor erythroid 2-like 1 isoform 1                                                   | 1  | 1  | 0  |
| 163965422 | Nfib     | nuclear factor I/B isoform 3                                                                  | 0  | 4  | 0  |
| 126517474 | Nfix     | nuclear factor I/X isoform 3                                                                  | 1  | 1  | 0  |
| 117606364 | Nfkb1    | nuclear factor kappa-B, subunit 1                                                             | 1  | 1  | 1  |
| 254588131 | Nfatc2ip | nuclear factor of activated T-cells, cytoplasmic, calcineurin-dependent 2 interacting protein | 0  | 0  | 1  |
| 293651548 | Nfkb2    | nuclear factor of kappa light polypeptide gene enhancer in B-cells 2, p49/p100                | 2  | 0  | 0  |
| 226874843 | Nfkbiz   | nuclear factor of kappa light polypeptide gene enhancer in B-cells inhibitor, zeta isoform a  | 0  | 1  | 0  |
| 40254249  | Nfrkb    | nuclear factor related to kappaB binding protein                                              | 0  | 1  | 0  |
| 19527358  | Prpf19   | nuclear matrix protein SNEV                                                                   | 6  | 18 | 15 |
| 254675300 | Numa1    | nuclear mitotic apparatus protein 1                                                           | 8  | 78 | 38 |
| 270309140 | Tpr      | nuclear pore complex-associated protein Tpr                                                   | 4  | 74 | 10 |
| 156231054 | Pom121   | nuclear pore membrane protein 121                                                             | 0  | 0  | 5  |
| 254911120 | Narfl    | nuclear prelamin A recognition factor-like                                                    | 1  | 0  | 0  |
| 303324586 | Nploc4   | nuclear protein localization 4                                                                | 1  | 2  | 0  |
| 22219434  | Nrbp1    | nuclear receptor binding protein                                                              | 1  | 0  | 0  |
| 118026944 | Ncoa2    | nuclear receptor coactivator 2 isoform a                                                      | 0  | 0  | 1  |
| 21450271  | Ncoa5    | nuclear receptor coactivator 5                                                                | 0  | 0  | 4  |
| 145587671 | Ncoa6    | nuclear receptor coactivator 6                                                                | 0  | 1  | 0  |
| 119226235 | Ncor2    | nuclear receptor co-repressor 2                                                               | 0  | 1  | 0  |
| 27734110  | Nrip1    | nuclear receptor interacting protein 1                                                        | 1  | 0  | 0  |
| 73611910  | Nr2f2    | nuclear receptor subfamily 2, group F, member 2 isoform 1                                     | 0  | 4  | 0  |
| 112807199 | Nr2f6    | nuclear receptor subfamily 2, group F, member 6                                               | 0  | 1  | 0  |
| 6754216   | Nr4a1    | nuclear receptor subfamily 4, group A, member 1                                               | 0  | 0  | 1  |
| 255982555 | Nrf1     | nuclear respiratory factor 1                                                                  | 0  | 3  | 0  |
| 31980798  | Nxf1     | nuclear RNA export factor 1                                                                   | 1  | 17 | 5  |
| 12963545  | Znrd1    | nuclear RNA polymerase I small specific subunit                                               | 0  | 1  | 0  |
| 161016831 | Nfya     | nuclear transcription factor Y, alpha isoform b                                               | 0  | 1  | 0  |
| 6754850   | Nfyb     | nuclear transcription factor-Y beta                                                           | 0  | 3  | 0  |
| 114326538 | Nfyc     | nuclear transcription factor-Y gamma                                                          | 0  | 4  | 0  |
| 13386032  | Nutf2    | nuclear transport factor 2                                                                    | 2  | 0  | 0  |
| 33468981  | Nvl      | nuclear VCP-like                                                                              | 0  | 1  | 2  |
| 113205059 | Ybx1     | nuclease sensitive element binding protein 1                                                  | 10 | 6  | 9  |
| 254750698 | Nucb1    | nucleobindin 1 isoform 2                                                                      | 12 | 0  | 0  |
| 194440700 | Nucb2    | nucleobindin 2 isoform 2                                                                      | 6  | 0  | 0  |
| 86198333  | Nolc1    | nucleolar and coiled-body phosphoprotein 1 isoform C                                          | 1  | 8  | 2  |
| 124301227 | Noc2l    | nucleolar complex associated 2 homolog                                                        | 0  | 3  | 8  |
| 188497644 | Noc3l    | nucleolar complex associated 3 homolog                                                        | 0  | 0  | 3  |
| 31981994  | Noc4l    | nucleolar complex associated 4 homolog                                                        | 0  | 2  | 2  |
| 158966689 | Nop2     | nucleolar protein 1                                                                           | 0  | 9  | 9  |

|           |        |                                                              |    |    |    |
|-----------|--------|--------------------------------------------------------------|----|----|----|
| 238550124 | Nol11  | nucleolar protein 11 isoform 1                               | 0  | 0  | 9  |
| 120407050 | Nop58  | nucleolar protein 5                                          | 7  | 24 | 17 |
| 126090932 | Nop56  | nucleolar protein 5A                                         | 6  | 33 | 30 |
| 117647257 | Nol7   | nucleolar protein 7                                          | 0  | 0  | 1  |
| 118026904 | Nol6   | nucleolar protein family 6                                   | 0  | 16 | 3  |
| 13384710  | Gar1   | nucleolar protein family A, member 1                         | 0  | 6  | 5  |
| 21312650  | Ddx56  | nucleolar RNA helicase homolog                               | 0  | 0  | 2  |
| 84875537  | Ncl    | nucleolin                                                    | 24 | 21 | 13 |
| 6679108   | Npm1   | nucleophosmin 1                                              | 3  | 13 | 4  |
| 6679110   | Npm3   | nucleoplasmin 3                                              | 1  | 3  | 0  |
| 29789351  | Nup107 | nucleoporin 107                                              | 0  | 16 | 12 |
| 283806543 | Nup133 | nucleoporin 133                                              | 0  | 27 | 22 |
| 254588102 | Nup153 | nucleoporin 153                                              | 2  | 0  | 6  |
| 165932389 | Nup155 | nucleoporin 155                                              | 1  | 29 | 21 |
| 10946932  | Nup160 | nucleoporin 160                                              | 0  | 34 | 12 |
| 38678526  | Nup188 | nucleoporin 188                                              | 0  | 15 | 12 |
| 226437676 | Nup205 | nucleoporin 205                                              | 1  | 48 | 32 |
| 172073152 | Nup210 | nucleoporin 210                                              | 0  | 11 | 44 |
| 124378033 | Nup214 | nucleoporin 214                                              | 0  | 4  | 0  |
| 298231198 | Nup35  | nucleoporin 35                                               | 0  | 2  | 5  |
| 210032861 | Nup37  | nucleoporin 37                                               | 0  | 10 | 5  |
| 38016154  | Nup50  | nucleoporin 50                                               | 0  | 6  | 5  |
| 39930543  | Nup54  | nucleoporin 54                                               | 0  | 15 | 6  |
| 16716349  | Nup62  | nucleoporin 62                                               | 1  | 10 | 2  |
| 108773813 | Nup85  | nucleoporin 85                                               | 0  | 15 | 6  |
| 134053894 | Nup88  | nucleoporin 88 isoform 1                                     | 0  | 11 | 4  |
| 27369533  | Nup93  | nucleoporin 93                                               | 1  | 27 | 20 |
| 39930413  | Nup98  | nucleoporin 98                                               | 0  | 2  | 12 |
| 24497431  | Nupl1  | nucleoporin like 1                                           | 0  | 8  | 1  |
| 166295220 | Nup43  | nucleoporin Nup43                                            | 0  | 3  | 1  |
| 255308888 | Nme3   | nucleoside diphosphate kinase 3                              | 1  | 0  | 3  |
| 117606270 | Nme2   | nucleoside diphosphate kinase B                              | 2  | 3  | 4  |
| 37700232  | Nme1   | nucleoside-diphosphate kinase 1                              | 9  | 4  | 6  |
| 226443026 | Nap111 | nucleosome assembly protein 1-like 1 isoform 2               | 5  | 0  | 1  |
| 6679012   | Nap114 | nucleosome assembly protein 1-like 4                         | 3  | 1  | 0  |
| 133778915 | Nsbp1  | nucleosome binding protein 1                                 | 1  | 13 | 1  |
| 167234411 | Nubpl  | nucleotide binding protein-like                              | 2  | 0  | 0  |
| 133922575 | Nudcd2 | NudC domain containing 2                                     | 0  | 1  | 0  |
| 84871976  | Nudt18 | nudix (nucleoside diphosphate linked moiety X)-type motif 18 | 0  | 0  | 1  |
| 13386106  | Nudt21 | nudix (nucleoside diphosphate linked moiety X)-type motif 21 | 4  | 13 | 3  |
| 86198335  | Nudt2  | nudix-type motif 2                                           | 0  | 0  | 1  |
| 8393853   | Nudt5  | nudix-type motif 5                                           | 4  | 0  | 1  |
| 13384950  | Nudt8  | nudix-type motif 8                                           | 1  | 2  | 0  |
| 110625714 | Nuf2   | NUF2R protein                                                | 1  | 0  | 0  |
| 209862959 | Numb   | numb gene homolog isoform 1                                  | 1  | 1  | 0  |
| 19527352  | Nrm    | nurim                                                        | 0  | 3  | 6  |
| 229577356 | Ociad1 | OCIA domain containing 1 isoform 1                           | 8  | 0  | 4  |
| 126723205 | Obfc2a | oligonucleotide/oligosaccharide-binding fold containing 2A   | 0  | 2  | 0  |
| 28076937  | Obfc2b | oligonucleotide/oligosaccharide-binding fold containing 2B   | 0  | 3  | 0  |
| 46909607  | Ogt    | O-linked N-acetylglucosamine transferase                     | 0  | 2  | 0  |

|           |               |                                                                      |    |    |    |
|-----------|---------------|----------------------------------------------------------------------|----|----|----|
| 22164770  | Oit1          | oncprotein induced transcript 1                                      | 1  | 0  | 0  |
| 312836758 | Opa1          | optic atrophy 1 homolog                                              | 3  | 0  | 0  |
| 124286818 | Orc4l         | origin recognition complex subunit 4                                 | 0  | 1  | 0  |
| 255069721 | Orc6l         | origin recognition complex subunit 6-like isoform a                  | 0  | 0  | 1  |
| 70909306  | Orc2l         | origin recognition complex, subunit 2-like isoform B                 | 0  | 3  | 1  |
| 227116263 | Orc3l         | origin recognition complex, subunit 3-like isoform 1                 | 0  | 1  | 1  |
| 84662768  | Osgep         | O-sialoglycoprotein endopeptidase                                    | 1  | 0  | 0  |
| 22267440  | Ostf1         | osteoclast stimulating factor 1                                      | 3  | 0  | 0  |
| 283837911 | Os9           | osteosarcoma amplified 9                                             | 4  | 0  | 0  |
| 19527388  | Otub1         | otubain 1                                                            | 9  | 0  | 5  |
| 295054201 | Odf2          | outer dense fiber of sperm tails 2 isoform a                         | 0  | 0  | 1  |
| 124301201 | Nfxl1         | ovarian zinc finger protein                                          | 1  | 0  | 1  |
| 9910472   | Ovol1         | OVO homolog-like 1                                                   | 0  | 2  | 1  |
| 194328708 | Oxr1          | oxidation resistance 1 isoform A                                     | 2  | 0  | 0  |
| 110626165 | Oxsr1         | oxidative-stress responsive 1                                        | 1  | 0  | 0  |
| 85861164  | Ogdh          | oxoglutarate dehydrogenase (lipoamide)                               | 38 | 1  | 3  |
| 52345396  | Osbpl1a       | oxysterol binding protein-like 1                                     | 1  | 0  | 0  |
| 257196261 | Osbpl11       | oxysterol binding protein-like 11                                    | 0  | 0  | 1  |
| 198278439 | Osbpl9        | oxysterol binding protein-like 9 isoform a                           | 0  | 0  | 2  |
| 112181194 | Pak1          | p21-activated kinase 1                                               | 1  | 0  | 0  |
| 46559406  | Pak2          | p21-activated kinase 2                                               | 7  | 0  | 0  |
| 29336032  | Pak4          | p21-activated kinase 4                                               | 0  | 2  | 0  |
| 224994209 | Pak6          | p21-activated kinase 6                                               | 0  | 0  | 1  |
| 226958577 | 2610301G19Rik | p30 DBC protein                                                      | 7  | 37 | 10 |
| 38198665  | Nsfl1c        | p47 protein                                                          | 6  | 0  | 0  |
| 164519134 | Gatad2a       | p66 alpha isoform b                                                  | 0  | 7  | 4  |
| 62243808  | Dopey2        | pad-1-like isoform 1                                                 | 1  | 0  | 1  |
| 6754990   | Pax8          | paired box gene 8                                                    | 0  | 4  | 0  |
| 145046259 | Pak1ip1       | PAK/PLC-interacting protein 1                                        | 1  | 14 | 1  |
| 165377089 | Arhgef7       | PAK-interacting exchange factor beta isoform c                       | 3  | 0  | 1  |
| 171846274 | X99384        | paladin                                                              | 1  | 0  | 0  |
| 9790039   | Pldn          | pallidin                                                             | 1  | 0  | 0  |
| 121674797 | Ppt1          | palmitoyl-protein thioesterase 1                                     | 6  | 0  | 0  |
| 226958374 | Sypl          | pantophysin isoform 2                                                | 3  | 0  | 0  |
| 22122397  | Pank3         | pantothenate kinase 3                                                | 0  | 0  | 1  |
| 15809012  | Prcc          | papillary renal cell carcinoma translocation-associated gene product | 0  | 4  | 0  |
| 167004227 | Coq2          | para-hydroxybenzoate-polyprenyltransferase, mitochondrial            | 0  | 1  | 1  |
| 34303979  | Pon2          | paraoxonase 2                                                        | 5  | 0  | 0  |
| 225543409 | Pspc1         | paraspeckle protein 1                                                | 1  | 13 | 4  |
| 55741460  | Park7         | Parkinson disease protein 7                                          | 6  | 0  | 0  |
| 171184415 | Pard3         | partitioning-defective protein 3 homolog isoform 1                   | 0  | 0  | 1  |
| 124486979 | Palb2         | partner and localizer of BRCA2                                       | 0  | 1  | 0  |
| 13384846  | Pno1          | partner of NOB1                                                      | 0  | 5  | 3  |
| 31982526  | Parva         | parvin, alpha                                                        | 1  | 1  | 0  |
| 170763472 | Pnpla6        | patatin-like phospholipase domain containing 6                       | 1  | 0  | 0  |
| 118130807 | Pnpla8        | patatin-like phospholipase domain containing 8                       | 1  | 0  | 0  |
| 42734451  | Paxip1        | Pax transcription activation domain interacting protein              | 0  | 3  | 0  |
| 34368580  | Pknox1        | Pbx/knotted 1 homeobox                                               | 0  | 2  | 0  |
| 119372296 | Pcid2         | PCI domain containing 2                                              | 0  | 6  | 1  |
| 6679233   | Pctk3         | PCTAIRE protein kinase 3                                             | 0  | 8  | 5  |
| 7242173   | Pctk1         | PCTAIRE-motif protein kinase 1                                       | 1  | 0  | 1  |
| 84781781  | Pdap1         | PDGFA associated protein 1                                           | 0  | 5  | 0  |

|           |          |                                                            |    |    |    |
|-----------|----------|------------------------------------------------------------|----|----|----|
| 166197681 | Pdlim7   | PDZ and LIM domain 7 isoform b                             | 0  | 1  | 0  |
| 21312244  | Pdzd11   | PDZ domain containing 11                                   | 0  | 4  | 4  |
| 124053449 | Intu     | PDZ domain containing 6                                    | 0  | 0  | 1  |
| 20373163  | Scrib    | PDZ-domain protein scribble                                | 3  | 2  | 13 |
| 33469980  | Ptcd3    | pentatricopeptide repeat domain 3                          | 7  | 2  | 0  |
| 27502349  | Pmpca    | peptidase (mitochondrial processing) alpha                 | 12 | 7  | 0  |
| 171906557 | Padi2    | peptidyl arginine deiminase, type II                       | 5  | 0  | 1  |
| 156938252 | Padi4    | peptidyl arginine deiminase, type IV                       | 0  | 16 | 0  |
| 6679439   | Ppia     | peptidylprolyl isomerase A                                 | 16 | 14 | 11 |
| 71774133  | Ppib     | peptidylprolyl isomerase B                                 | 9  | 13 | 4  |
| 6679441   | Ppic     | peptidylprolyl isomerase C                                 | 0  | 1  | 0  |
| 13385854  | Ppid     | peptidylprolyl isomerase D                                 | 6  | 0  | 0  |
| 255683299 | Ppwd1    | peptidylprolyl isomerase domain and WD repeat containing 1 | 0  | 12 | 0  |
| 14196340  | Ppie     | peptidylprolyl isomerase E                                 | 2  | 4  | 4  |
| 19527310  | Ppif     | peptidylprolyl isomerase F                                 | 2  | 5  | 0  |
| 124487333 | Ppig     | peptidylprolyl isomerase G                                 | 0  | 0  | 1  |
| 158631196 | Ppih     | peptidylprolyl isomerase H isoform 1                       | 1  | 11 | 2  |
| 21312784  | Ppil1    | peptidylprolyl isomerase-like 1                            | 2  | 2  | 3  |
| 30025020  | Ppil2    | peptidylprolyl isomerase-like 2                            | 1  | 1  | 1  |
| 169790966 | Ppil3    | peptidylprolyl isomerase-like 3 isoform 1                  | 0  | 1  | 0  |
| 165972339 | Ppil4    | peptidylprolyl isomerase-like 4                            | 1  | 2  | 0  |
| 30519902  | Pthr1    | peptidyl-tRNA hydrolase 1 homolog                          | 0  | 1  | 0  |
| 93004085  | Pcnt     | pericentrin                                                | 1  | 1  | 5  |
| 170763496 | Pcm1     | pericentriolar material 1                                  | 2  | 0  | 1  |
| 284005509 | Pwp1     | periodic tryptophan protein 1 homolog                      | 0  | 1  | 0  |
| 163838662 | Tspo     | peripheral benzodiazepine receptor                         | 0  | 0  | 3  |
| 158749615 | BC016423 | peripheral benzodiazepine receptor associated protein      | 1  | 0  | 1  |
| 133779004 | Pphn1    | periphilin 1 isoform 1                                     | 0  | 1  | 1  |
| 112421039 | Ppl      | periplakin                                                 | 56 | 90 | 92 |
| 183979966 | Hspg2    | perlecan (heparan sulfate proteoglycan 2)                  | 1  | 1  | 2  |
| 268370173 | Pxdn     | peroxidasin                                                | 1  | 1  | 2  |
| 61657895  | Pex1     | peroxin1                                                   | 0  | 1  | 0  |
| 6754976   | Prdx1    | peroxiredoxin 1                                            | 4  | 15 | 8  |
| 148747558 | Prdx2    | peroxiredoxin 2                                            | 7  | 7  | 0  |
| 6680690   | Prdx3    | peroxiredoxin 3                                            | 9  | 1  | 1  |
| 7948999   | Prdx4    | peroxiredoxin 4                                            | 9  | 1  | 1  |
| 6755114   | Prdx5    | peroxiredoxin 5 precursor                                  | 14 | 8  | 6  |
| 6671549   | Prdx6    | peroxiredoxin 6                                            | 7  | 0  | 0  |
| 241666485 | Pex11b   | peroxisomal biogenesis factor 11 beta isoform 1            | 2  | 1  | 2  |
| 9790153   | Pex14    | peroxisomal biogenesis factor 14                           | 0  | 0  | 1  |
| 254750742 | Pex16    | peroxisomal biogenesis factor 16                           | 3  | 0  | 3  |
| 9910484   | Pex3     | peroxisomal biogenesis factor 3                            | 1  | 0  | 1  |
| 160333197 | Peci     | peroxisomal D3,D2-enoyl-CoA isomerase isoform a            | 4  | 1  | 0  |
| 10946966  | Pxmp4    | peroxisomal membrane protein 4                             | 1  | 1  | 1  |
| 256220343 | Dhrs4    | peroxisomal short-chain alcohol dehydrogenase isoform 2    | 8  | 14 | 3  |
| 11528520  | Perp     | PERP, TP53 apoptosis effector                              | 0  | 0  | 1  |
| 12584984  | Pes1     | pescadillo homolog 1, containing BRCT domain               | 0  | 1  | 5  |
| 71480098  | Pcnp     | PEST proteolytic signal containing nuclear protein         | 2  | 4  | 0  |
| 255683374 | Ppan     | peter pan homolog                                          | 0  | 0  | 2  |
| 255522851 | Phf10    | PHD finger protein 10                                      | 0  | 4  | 0  |
| 198442868 | Phf12    | PHD finger protein 12                                      | 0  | 1  | 0  |
| 270288744 | Phf14    | PHD finger protein 14                                      | 0  | 5  | 3  |

|           |         |                                                                                                      |    |    |   |
|-----------|---------|------------------------------------------------------------------------------------------------------|----|----|---|
| 194328769 | Phf17   | PHD finger protein 17                                                                                | 1  | 1  | 1 |
| 31543476  | Phf2    | PHD finger protein 2                                                                                 | 0  | 3  | 0 |
| 124487195 | Phf2011 | PHD finger protein 20-like 1                                                                         | 1  | 0  | 0 |
| 226423861 | Phf23   | PHD finger protein 23                                                                                | 0  | 1  | 0 |
| 124487309 | Phf3    | PHD finger protein 3                                                                                 | 0  | 3  | 0 |
| 33563292  | Phf6    | PHD finger protein 6                                                                                 | 0  | 4  | 0 |
| 164518891 | Phf8    | PHD finger protein 8 isoform b                                                                       | 1  | 0  | 0 |
| 24415990  | Phf5a   | PHD-finger 5A                                                                                        | 1  | 4  | 2 |
| 162138894 | Farsa   | phenylalanyl-tRNA synthetase, alpha subunit                                                          | 1  | 3  | 1 |
| 31981400  | Farsb   | phenylalanyl-tRNA synthetase, beta subunit                                                           | 13 | 8  | 0 |
| 6681255   | Ebp     | phenylalkylamine Ca <sup>2+</sup> antagonist (emopamil) binding protein                              | 1  | 0  | 0 |
| 31980842  | Pcyt2   | phosphate cytidyltransferase 2, ethanolamine                                                         | 1  | 0  | 0 |
| 20149726  | Cds2    | phosphatidate cytidyltransferase 2                                                                   | 2  | 0  | 0 |
| 77861908  | Ppapdc2 | phosphatidic acid phosphatase type 2 domain containing 2                                             | 1  | 0  | 0 |
| 110431341 | Ppap2c  | phosphatidic acid phosphatase type 2c                                                                | 2  | 0  | 2 |
| 84794552  | Pebp1   | phosphatidylethanolamine binding protein 1                                                           | 5  | 0  | 1 |
| 110626163 | Pgs1    | phosphatidylglycerophosphate synthase 1                                                              | 1  | 1  | 0 |
| 41872422  | Pigh    | phosphatidylinositol glycan anchor biosynthesis, class H                                             | 1  | 0  | 0 |
| 29789447  | Pigk    | phosphatidylinositol glycan anchor biosynthesis, class K isoform 1                                   | 3  | 0  | 0 |
| 239937480 | Pigo    | phosphatidylinositol glycan anchor biosynthesis, class O                                             | 0  | 1  | 0 |
| 41351529  | Pigs    | phosphatidylinositol glycan anchor biosynthesis, class S                                             | 13 | 0  | 2 |
| 9790159   | Pitpnb  | phosphatidylinositol transfer protein, beta                                                          | 2  | 0  | 0 |
| 31982833  | Pip5k1a | phosphatidylinositol-4-phosphate 5-kinase, type I, alpha                                             | 0  | 1  | 0 |
| 32567788  | Picalm  | phosphatidylinositol-binding clathrin assembly protein                                               | 3  | 5  | 2 |
| 126722757 | Pisd    | phosphatidylserine decarboxylase                                                                     | 0  | 0  | 1 |
| 158749580 | Pde4dip | phosphodiesterase 4D interacting protein isoform 1                                                   | 1  | 0  | 0 |
| 31560653  | Pfkl    | phosphofructokinase, liver, B-type                                                                   | 21 | 2  | 3 |
| 9790051   | Pfkl    | phosphofructokinase, platelet                                                                        | 11 | 0  | 0 |
| 227330633 | Pgm2    | phosphoglucomutase 2                                                                                 | 13 | 0  | 0 |
| 124486895 | Pgd     | phosphogluconate dehydrogenase                                                                       | 9  | 0  | 1 |
| 52353955  | Phgdh   | phosphoglycerate dehydrogenase                                                                       | 12 | 0  | 8 |
| 70778976  | Pgk1    | phosphoglycerate kinase 1                                                                            | 20 | 0  | 5 |
| 254587962 | Pgam5   | phosphoglycerate mutase family member 5 isoform 2                                                    | 7  | 2  | 4 |
| 114431250 | Plaa    | phospholipase A2, activating protein                                                                 | 1  | 0  | 0 |
| 31982122  | Plcb3   | phospholipase C beta 3                                                                               | 9  | 25 | 0 |
| 26986603  | Plcg2   | phospholipase C, gamma 2                                                                             | 0  | 0  | 1 |
| 7242181   | Pld3    | phospholipase D family, member 3                                                                     | 0  | 2  | 0 |
| 194328695 | Plscr1  | phospholipid scramblase 1                                                                            | 4  | 0  | 0 |
| 281182714 | Plscr3  | phospholipid scramblase 3                                                                            | 1  | 0  | 0 |
| 8393988   | Pmm2    | phosphomannomutase 2                                                                                 | 2  | 0  | 0 |
| 254588058 | Pmvk    | phosphomevalonate kinase isoform 1                                                                   | 0  | 0  | 2 |
| 21426847  | Pea15a  | phosphoprotein enriched in astrocytes 15 isoform 2                                                   | 3  | 0  | 1 |
| 10946854  | Prps1   | phosphoribosyl pyrophosphate synthetase 1                                                            | 7  | 0  | 0 |
| 13386146  | Prps2   | phosphoribosyl pyrophosphate synthetase 2                                                            | 1  | 0  | 0 |
| 256773299 | Prpsap2 | phosphoribosyl pyrophosphate synthetase-associated protein 2                                         | 2  | 0  | 0 |
| 13385434  | Paics   | phosphoribosylaminoimidazole carboxylase, phosphoribosylaminoimidazole succinocarboxamide synthetase | 3  | 0  | 2 |

|           |               |                                                                                        |    |    |     |
|-----------|---------------|----------------------------------------------------------------------------------------|----|----|-----|
| 226958458 | Pfas          | phosphoribosylformylglycinamide synthase (FGAR amidotransferase)                       | 4  | 0  | 0   |
| 93102415  | Gart          | phosphoribosylglycinamide formyltransferase                                            | 9  | 0  | 0   |
| 329299029 | Psat1         | phosphoserine aminotransferase 1                                                       | 16 | 0  | 2   |
| 20982845  | Fus           | pigpen                                                                                 | 9  | 10 | 6   |
| 112420990 | Pnn           | pinin                                                                                  | 4  | 7  | 21  |
| 126032319 | Pitpnm3       | Pitpnm family member 3 isoform 1                                                       | 0  | 0  | 1   |
| 21699068  | Pitrm1        | pitrilysin metallepetidase 1                                                           | 21 | 2  | 0   |
| 124286797 | 1600029D21Rik | placenta expressed transcript 1                                                        | 1  | 1  | 2   |
| 21312960  | Pkp2          | plakophilin 2                                                                          | 0  | 0  | 17  |
| 242332587 | Pkp3          | plakophilin 3 isoform 1                                                                | 0  | 0  | 4   |
| 147899467 | Pkp4          | plakophilin 4 isoform 1                                                                | 1  | 0  | 12  |
| 62234487  | Atp2b1        | plasma membrane calcium ATPase 1                                                       | 6  | 0  | 0   |
| 85986577  | Pls1          | plastin 1 (I-isoform)                                                                  | 3  | 3  | 2   |
| 262050551 | Pls3          | plastin 3 precursor                                                                    | 14 | 18 | 4   |
| 7305363   | Pafah1b1      | platelet-activating factor acetylhydrolase, isoform Ib, alpha subunit                  | 2  | 9  | 0   |
| 40254624  | Pafah1b2      | platelet-activating factor acetylhydrolase, isoform Ib, beta subunit                   | 3  | 0  | 0   |
| 6679201   | Pafah1b3      | platelet-activating factor acetylhydrolase, isoform Ib, gamma subunit                  | 4  | 0  | 1   |
| 163644296 | Psd3          | pleckstrin and Sec7 domain containing 3 isoform 2                                      | 1  | 0  | 0   |
| 27370088  | Plekha7       | pleckstrin homology domain containing, family A member 7                               | 0  | 0  | 1   |
| 167621502 | Plekhg3       | pleckstrin homology domain containing, family G (with RhoGef domain) member 3          | 0  | 0  | 11  |
| 256818761 | Plekhh1       | pleckstrin homology domain containing, family H (with MyTH4 domain) member 1 isoform 1 | 0  | 1  | 0   |
| 124487035 | Phip          | pleckstrin homology domain interacting protein                                         | 0  | 0  | 3   |
| 226442929 | Phlda1        | pleckstrin homology-like domain, family A, member 1                                    | 0  | 0  | 1   |
| 188528897 | Phldb2        | pleckstrin homology-like domain, family B, member 2                                    | 1  | 0  | 1   |
| 256000747 | Plec1         | plectin 1 isoform 1b                                                                   | 65 | 52 | 201 |
| 34610215  | Plagl2        | pleiomorphic adenoma gene-like 2                                                       | 1  | 0  | 2   |
| 31980791  | Plrg1         | pleiotropic regulator 1                                                                | 1  | 13 | 5   |
| 113722113 | Plxna2        | plexin A2                                                                              | 1  | 0  | 0   |
| 226958476 | Plxnb2        | plexin B2 isoform 13                                                                   | 32 | 0  | 0   |
| 153792704 | Plxnd1        | plexin D1                                                                              | 0  | 0  | 1   |
| 160333703 | Kdm5b         | PLU1                                                                                   | 0  | 1  | 1   |
| 260099686 | Pogz          | pogo transposable element with ZNF domain                                              | 0  | 3  | 4   |
| 228480275 | Pvrl2         | poliovirus receptor-related 2 isoform 1                                                | 2  | 0  | 0   |
| 20806109  | Parp1         | poly (ADP-ribose) polymerase family, member 1                                          | 1  | 16 | 0   |
| 25014095  | Parp3         | poly (ADP-ribose) polymerase family, member 3                                          | 0  | 3  | 1   |
| 281485553 | Parp4         | poly (ADP-ribose) polymerase family, member 4                                          | 0  | 0  | 1   |
| 13384918  | Parp9         | poly (ADP-ribose) polymerase family, member 9                                          | 0  | 0  | 1   |
| 31560656  | Pabpc1        | poly(A) binding protein, cytoplasmic 1                                                 | 21 | 1  | 18  |
| 34419622  | Pabpc4        | poly(A) binding protein, cytoplasmic 4 isoform 2                                       | 1  | 0  | 1   |
| 9506945   | Pabpn1        | poly(A) binding protein, nuclear 1                                                     | 0  | 4  | 7   |
| 21311877  | Parn          | poly(A)-specific ribonuclease (deadenylation nuclease)                                 | 1  | 2  | 0   |
| 6754994   | Pcbp1         | poly(rC) binding protein 1                                                             | 11 | 11 | 9   |
| 157057549 | Pcbp2         | poly(rC) binding protein 2 isoform 2                                                   | 11 | 21 | 15  |
| 13385420  | Pmf1          | polyamine-modulated factor 1                                                           | 0  | 2  | 0   |
| 124486951 | Pbrm1         | polybromo 1                                                                            | 0  | 35 | 3   |
| 28076973  | Pcgf6         | polycomb group ring finger 6                                                           | 0  | 1  | 0   |
| 294862233 | Pkd1l2        | polycystin 1-like 2                                                                    | 1  | 0  | 1   |
| 31980927  | Pqbp1         | polyglutamine binding protein 1                                                        | 0  | 1  | 1   |



|           |         |                                                                                                |    |    |    |
|-----------|---------|------------------------------------------------------------------------------------------------|----|----|----|
| 110835733 | Phc1    | polyhomeotic-like 1 isoform a                                                                  | 0  | 1  | 0  |
| 29336059  | Polr2c  | polymerase (RNA) II (DNA directed) polypeptide C                                               | 1  | 2  | 10 |
| 28076931  | Polr2d  | polymerase (RNA) II (DNA directed) polypeptide D isoform 2                                     | 0  | 2  | 4  |
| 124249077 | Polr2e  | polymerase (RNA) II (DNA directed) polypeptide E                                               | 1  | 3  | 6  |
| 13385826  | Polr2g  | polymerase (RNA) II (DNA directed) polypeptide G                                               | 0  | 4  | 5  |
| 21704118  | Polr2h  | polymerase (RNA) II (DNA directed) polypeptide H                                               | 1  | 4  | 2  |
| 110625757 | Polr2i  | polymerase (RNA) II (DNA directed) polypeptide I                                               | 0  | 1  | 1  |
| 86355514  | Polr2k  | polymerase (RNA) II (DNA directed) polypeptide K isoform b                                     | 0  | 1  | 0  |
| 219881031 | Polr2l  | polymerase (RNA) II (DNA directed) polypeptide L                                               | 0  | 2  | 1  |
| 124486963 | Polr3a  | polymerase (RNA) III (DNA directed) polypeptide A, 155kDa                                      | 0  | 1  | 0  |
| 27229271  | Polr3h  | polymerase (RNA) III (DNA directed) polypeptide H                                              | 0  | 1  | 0  |
| 14780884  | Poldip2 | polymerase delta interacting protein 38                                                        | 3  | 0  | 1  |
| 6679567   | Ptrf    | polymerase I and transcript release factor                                                     | 1  | 2  | 0  |
| 118601009 | Pnkp    | polynucleotide kinase 3' and phosphatase                                                       | 0  | 13 | 0  |
| 326368217 | Reep6   | polyposis locus protein 1-like 1                                                               | 2  | 0  | 0  |
| 116517303 | Ptbp1   | polypyrimidine tract binding protein 1 isoform 2                                               | 13 | 30 | 18 |
| 9507003   | Ptbp2   | polypyrimidine tract binding protein 2                                                         | 0  | 8  | 1  |
| 25188204  | Pnpt1   | polyribonucleotide nucleotidyltransferase 1                                                    | 1  | 6  | 0  |
| 126517505 | Kcmf1   | potassium channel modulatory factor 1                                                          | 2  | 0  | 0  |
| 161333815 | Kctd9   | potassium channel tetramerisation domain containing 9 isoform b                                | 0  | 1  | 0  |
| 226531251 | Prdm15  | PR domain containing 15                                                                        | 1  | 0  | 0  |
| 20070422  | Praf2   | PRA1 domain family 2                                                                           | 1  | 0  | 0  |
| 34365779  | Pbx1    | pre B-cell leukemia transcription factor 1 isoform a                                           | 0  | 3  | 0  |
| 7949105   | Pbx3    | pre B-cell leukemia transcription factor 3                                                     | 0  | 0  | 1  |
| 22122651  | Pbxip1  | pre-B-cell leukemia transcription factor interacting protein 1                                 | 1  | 0  | 0  |
| 124486993 | Gm5560  | predicted gene 5560                                                                            | 7  | 1  | 5  |
| 13385532  | Pfdn1   | prefoldin 1                                                                                    | 1  | 0  | 0  |
| 31981577  | Pfdn2   | prefoldin 2                                                                                    | 2  | 0  | 0  |
| 268370153 | Pcf11   | pre-mRNA cleavage complex II protein Pcf11                                                     | 1  | 0  | 0  |
| 256665245 | Cpsf7   | pre-mRNA cleavage factor I, 59 kDa subunit                                                     | 0  | 14 | 1  |
| 115583687 | Prpf8   | pre-mRNA processing factor 8                                                                   | 5  | 99 | 78 |
| 13385294  | Pcyox1  | prenylcysteine oxidase 1                                                                       | 11 | 0  | 0  |
| 87196490  | Pawr    | PRKC, apoptosis, WT1, regulator                                                                | 0  | 3  | 0  |
| 114158701 | Nop14   | probable nucleolar complex protein 14                                                          | 0  | 0  | 5  |
| 20270200  | Pop5    | processing of precursor 5                                                                      | 0  | 2  | 0  |
| 34328045  | Col4a4  | procollagen, type IV, alpha 4                                                                  | 2  | 0  | 0  |
| 40789282  | Col18a1 | procollagen, type XVIII, alpha 1 isoform 2                                                     | 4  | 5  | 8  |
| 6755110   | Plod3   | procollagen-lysine, 2-oxoglutarate 5-dioxygenase 3                                             | 1  | 1  | 0  |
| 33859596  | P4ha1   | procollagen-proline, 2-oxoglutarate 4-dioxygenase (proline 4-hydroxylase), alpha 1 polypeptide | 14 | 1  | 0  |
| 6755040   | Pfn1    | profilin 1                                                                                     | 8  | 2  | 7  |
| 31980806  | Pgrmc1  | progesterone receptor membrane component                                                       | 10 | 0  | 2  |
| 226442772 | Pgrmc2  | progesterone receptor membrane component 2                                                     | 6  | 0  | 2  |
| 31560391  | Pdcd10  | programmed cell death 10                                                                       | 6  | 3  | 0  |
| 120407033 | Pdcd2   | programmed cell death 2                                                                        | 1  | 0  | 0  |
| 270309161 | Pdcd4   | programmed cell death 4                                                                        | 10 | 0  | 0  |
| 6755000   | Pdcd6   | programmed cell death 6                                                                        | 1  | 0  | 0  |
| 258547156 | Pdcd6ip | programmed cell death 6 interacting protein                                                    | 7  | 0  | 1  |
| 54607128  | Pdcd11  | programmed cell death protein 11                                                               | 0  | 28 | 23 |
| 6679299   | Phb     | prohibitin                                                                                     | 9  | 0  | 8  |

|           |           |                                                            |    |    |   |
|-----------|-----------|------------------------------------------------------------|----|----|---|
| 158749640 | Preb      | prolactin regulatory element binding protein               | 3  | 0  | 0 |
| 7242171   | Pcna      | proliferating cell nuclear antigen                         | 2  | 4  | 8 |
| 283945467 | Prr13     | proline rich 13                                            | 1  | 0  | 0 |
| 34328357  | Prr14     | proline rich 14                                            | 1  | 0  | 0 |
| 84872187  | Prosc     | proline synthetase co-transcribed isoform a                | 1  | 0  | 0 |
| 257900472 | Pelp1     | proline-, glutamic acid-, leucine-rich protein 1           | 0  | 4  | 2 |
| 226874876 | P4ha2     | prolyl 4-hydroxylase, alpha II subunit isoform 2           | 0  | 0  | 1 |
| 42415475  | P4hb      | prolyl 4-hydroxylase, beta polypeptide                     | 27 | 2  | 2 |
| 6755152   | Prep      | prolyl endopeptidase                                       | 9  | 0  | 0 |
| 254675316 | Prom1     | prominin 1 isoform s1                                      | 2  | 0  | 0 |
| 224994184 | Prom2     | prominin 2 isoform 1                                       | 2  | 0  | 0 |
| 160333286 | Pml       | promyelocytic leukemia isoform 2                           | 0  | 3  | 9 |
| 13385310  | Pccb      | propionyl Coenzyme A carboxylase, beta polypeptide         | 14 | 0  | 0 |
| 254540162 | Pcca      | propionyl-Coenzyme A carboxylase, alpha polypeptide        | 18 | 0  | 0 |
| 161086990 | Prosapip1 | ProSAPiP1 protein                                          | 0  | 1  | 0 |
| 225735657 | Psap      | prosaposin isoform B preproprotein                         | 10 | 3  | 1 |
| 260763900 | Ptges2    | prostaglandin E synthase 2                                 | 6  | 0  | 0 |
| 50845420  | Ptgrn     | prostaglandin F2 receptor negative regulator precursor     | 4  | 0  | 0 |
| 9790017   | Ptges3    | prostaglandin-E synthase 3                                 | 4  | 3  | 4 |
| 6679537   | Ptgs1     | prostaglandin-endoperoxide synthase 1                      | 7  | 0  | 0 |
| 19111160  | Prss8     | prostasin                                                  | 0  | 0  | 1 |
| 20149318  | Ptov1     | prostate tumor over expressed gene 1                       | 0  | 1  | 0 |
| 6679501   | Psmc1     | protease (prosome, macropain) 26S subunit, ATPase 1        | 14 | 0  | 0 |
| 7110703   | Psmc5     | protease (prosome, macropain) 26S subunit, ATPase 5        | 10 | 0  | 1 |
| 116089322 | Lonp1     | protease, serine, 15                                       | 28 | 20 | 6 |
| 33859604  | Psmc2     | proteasome (prosome, macropain) 26S subunit, ATPase 2      | 9  | 0  | 1 |
| 228008337 | Psmc3     | proteasome (prosome, macropain) 26S subunit, ATPase 3      | 9  | 0  | 0 |
| 6754724   | Psmc7     | proteasome (prosome, macropain) 26S subunit, non-ATPase, 7 | 8  | 0  | 0 |
| 6755212   | Psmc1     | proteasome (prosome, macropain) 28 subunit, alpha          | 14 | 0  | 0 |
| 33563282  | Psmc1     | proteasome (prosome, macropain) subunit, alpha type 1      | 9  | 0  | 0 |
| 261824000 | Psmc3     | proteasome (prosome, macropain) subunit, alpha type 3      | 2  | 0  | 0 |
| 7106387   | Psmc5     | proteasome (prosome, macropain) subunit, alpha type 5      | 1  | 2  | 2 |
| 6755198   | Psmc6     | proteasome (prosome, macropain) subunit, alpha type 6      | 12 | 1  | 1 |
| 7106389   | Psmc7     | proteasome (prosome, macropain) subunit, alpha type 7      | 7  | 3  | 0 |
| 7242197   | Psmc1     | proteasome (prosome, macropain) subunit, beta type 1       | 9  | 2  | 0 |
| 227116345 | Psmc2     | proteasome (prosome, macropain) subunit, beta type 2       | 6  | 1  | 0 |
| 6755204   | Psmc5     | proteasome (prosome, macropain) subunit, beta type 5       | 11 | 3  | 0 |
| 6755206   | Psmc7     | proteasome (prosome, macropain) subunit, beta type 7       | 6  | 0  | 0 |
| 124248577 | Psmc4     | proteasome 26S ATPase subunit 4                            | 14 | 1  | 2 |
| 27754103  | Psmc6     | proteasome 26S ATPase subunit 6                            | 9  | 0  | 0 |
| 74315975  | Psmc1     | proteasome 26S non-ATPase subunit 1                        | 14 | 0  | 1 |
| 134053905 | Psmc11    | proteasome 26S non-ATPase subunit 11                       | 11 | 0  | 1 |
| 13385384  | Psmc12    | proteasome 26S non-ATPase subunit 12                       | 4  | 0  | 1 |
| 6755210   | Psmc13    | proteasome 26S non-ATPase subunit 13                       | 9  | 1  | 1 |
| 19882201  | Psmc2     | proteasome 26S non-ATPase subunit 2                        | 10 | 0  | 3 |
| 19705424  | Psmc3     | proteasome 26S non-ATPase subunit 3                        | 16 | 1  | 0 |
| 6679505   | Psmc4     | proteasome 26S non-ATPase subunit 4                        | 4  | 0  | 0 |
| 134053913 | Psmc5     | proteasome 26S non-ATPase subunit 5                        | 6  | 0  | 1 |
| 156713423 | Psmc8     | proteasome 26S non-ATPase subunit 8                        | 4  | 0  | 0 |
| 119508441 | Psmc9     | proteasome 26S non-ATPase subunit 9                        | 1  | 0  | 0 |
| 145966883 | Psmc14    | proteasome 26S subunit, non-ATPase 14                      | 5  | 0  | 1 |

|           |          |                                                                              |    |    |    |
|-----------|----------|------------------------------------------------------------------------------|----|----|----|
| 71725358  | Psme2    | proteasome activator subunit 2 isoform 1                                     | 10 | 0  | 0  |
| 6755214   | Psme3    | proteasome activator subunit 3                                               | 3  | 0  | 0  |
| 6755196   | Psma4    | proteasome alpha 4 subunit                                                   | 4  | 0  | 0  |
| 6755202   | Psmb3    | proteasome beta 3 subunit                                                    | 8  | 4  | 0  |
| 254540082 | Psmb4    | proteasome beta 4 subunit                                                    | 5  | 2  | 0  |
| 238231384 | Psmb6    | proteasome beta 6 subunit                                                    | 3  | 1  | 0  |
| 134031994 | Psma2    | proteasome subunit alpha type 2                                              | 5  | 2  | 0  |
| 46049022  | Psm6     | proteasome, 26S, non-ATPase regulatory subunit 6                             | 8  | 0  | 0  |
| 113931156 | Pin4     | protein (peptidyl-prolyl cis/trans isomerase) NIMA-interacting, 4 (parvulin) | 0  | 1  | 0  |
| 188528624 | Prmt5    | protein arginine methyltransferase 5                                         | 1  | 0  | 0  |
| 21703808  | Prmt7    | protein arginine methyltransferase 7                                         | 0  | 0  | 1  |
| 9790109   | Prmt1    | protein arginine N-methyltransferase 1                                       | 1  | 3  | 0  |
| 86198316  | Pdia4    | protein disulfide isomerase A4                                               | 23 | 3  | 0  |
| 30794140  | Pdia5    | protein disulfide isomerase A5                                               | 0  | 8  | 0  |
| 58037267  | Pdia6    | protein disulfide isomerase A6                                               | 2  | 0  | 1  |
| 112293264 | Pdia3    | protein disulfide-isomerase A3                                               | 35 | 12 | 10 |
| 226958422 | Pacsin2  | protein kinase C and casein kinase substrate in neurons 2                    | 2  | 8  | 0  |
| 163644252 | Pacsin3  | protein kinase C and casein kinase substrate in neurons 3                    | 0  | 7  | 2  |
| 6679465   | Prkcsh   | protein kinase C substrate 80K-H                                             | 16 | 0  | 1  |
| 6755082   | Prkcd    | protein kinase C, delta                                                      | 0  | 0  | 1  |
| 133778989 | Prkci    | protein kinase C, iota                                                       | 2  | 3  | 0  |
| 94681061  | Prkaa1   | protein kinase, AMP-activated, alpha 1 catalytic subunit                     | 6  | 0  | 1  |
| 30794476  | Prkar1a  | protein kinase, cAMP dependent regulatory, type I, alpha                     | 2  | 0  | 0  |
| 22550094  | Prkar2a  | protein kinase, cAMP dependent regulatory, type II alpha                     | 2  | 0  | 0  |
| 45598396  | Prkar2b  | protein kinase, cAMP dependent regulatory, type II beta                      | 7  | 0  | 1  |
| 7110693   | Prkaca   | protein kinase, cAMP dependent, catalytic, alpha                             | 3  | 1  | 0  |
| 255958320 | Prkacb   | protein kinase, cAMP dependent, catalytic, beta                              | 1  | 0  | 0  |
| 124517706 | Prkdc    | protein kinase, DNA-activated, catalytic polypeptide                         | 0  | 36 | 1  |
| 6755162   | Prkra    | protein kinase, interferon inducible double stranded RNA dependent activator | 0  | 0  | 2  |
| 110625699 | Pkmyt1   | protein kinase, membrane associated tyrosine/threonine 1                     | 0  | 0  | 1  |
| 13994195  | Ppp1ca   | protein phosphatase 1, catalytic subunit, alpha                              | 13 | 20 | 14 |
| 161484668 | Ppp1cb   | protein phosphatase 1, catalytic subunit, beta isoform                       | 3  | 8  | 3  |
| 31980772  | Ppp1cc   | protein phosphatase 1, catalytic subunit, gamma isoform                      | 0  | 1  | 0  |
| 95772123  | Ppp1r12a | protein phosphatase 1, regulatory (inhibitor) subunit 12A                    | 1  | 10 | 0  |
| 22122685  | Ppp1r8   | protein phosphatase 1, regulatory (inhibitor) subunit 8                      | 0  | 9  | 0  |
| 31711997  | Ppp1r9a  | protein phosphatase 1, regulatory (inhibitor) subunit 9A                     | 0  | 0  | 1  |
| 6679443   | Ppm1a    | protein phosphatase 1A, magnesium dependent, alpha isoform                   | 0  | 0  | 1  |
| 6679793   | Ppm1g    | protein phosphatase 1G (formerly 2C), magnesium-dependent, gamma isoform     | 3  | 0  | 0  |
| 9506983   | Ppp2ca   | protein phosphatase 2a, catalytic subunit, alpha isoform                     | 3  | 6  | 2  |
| 254587947 | Ppp2r4   | protein phosphatase 2A, regulatory subunit B                                 | 1  | 0  | 0  |
| 22726177  | Ppp2r2d  | protein phosphatase 2A, regulatory subunit B, delta isoform                  | 1  | 0  | 0  |
| 45592930  | Ppp3cb   | protein phosphatase 3, catalytic subunit, beta                               | 0  | 0  | 1  |
| 9790175   | Ppp4c    | protein phosphatase 4, catalytic subunit                                     | 0  | 0  | 1  |
| 166706862 | Ppp4r1   | protein phosphatase 4, regulatory subunit 1 isoform b                        | 0  | 1  | 0  |

|           |           |                                                                                                              |   |    |   |
|-----------|-----------|--------------------------------------------------------------------------------------------------------------|---|----|---|
| 33636709  | Ppp4r2    | protein phosphatase 4, regulatory subunit 2                                                                  | 2 | 0  | 0 |
| 21312758  | Ppp6c     | protein phosphatase 6, catalytic subunit                                                                     | 0 | 0  | 1 |
| 255308881 | Ppp1r10   | protein phosphatase I isoform 2                                                                              | 0 | 10 | 1 |
| 12963569  | Ppp1r7    | protein phosphatase-1 regulatory subunit 7                                                                   | 3 | 0  | 0 |
| 6755226   | Ptp4a1    | protein tyrosine phosphatase 4a1                                                                             | 0 | 3  | 0 |
| 258613926 | Ptp4a2    | protein tyrosine phosphatase 4a2                                                                             | 0 | 2  | 0 |
| 23956130  | Ptpmt1    | protein tyrosine phosphatase, mitochondrial 1                                                                | 1 | 1  | 1 |
| 133505845 | Ptpn1     | protein tyrosine phosphatase, non-receptor type 1                                                            | 3 | 0  | 0 |
| 134948762 | Ptpn13    | protein tyrosine phosphatase, non-receptor type 13                                                           | 0 | 0  | 1 |
| 110825986 | Ptpn14    | protein tyrosine phosphatase, non-receptor type 14                                                           | 0 | 1  | 1 |
| 124517678 | Ptpn23    | protein tyrosine phosphatase, non-receptor type 23                                                           | 2 | 0  | 0 |
| 118130785 | Ptpn6     | protein tyrosine phosphatase, non-receptor type 6 isoform b                                                  | 0 | 1  | 0 |
| 304361734 | Ppfia1    | protein tyrosine phosphatase, receptor type, f polypeptide (PTPRF), interacting protein, alpha 1             | 0 | 0  | 1 |
| 208609941 | Ptprij    | protein tyrosine phosphatase, receptor type, J isoform 1                                                     | 1 | 0  | 0 |
| 6679561   | Ptpirk    | protein tyrosine phosphatase, receptor type, K precursor                                                     | 1 | 0  | 0 |
| 226054321 | Ptpirm    | protein tyrosine phosphatase, receptor type, M                                                               | 1 | 0  | 1 |
| 171184435 | Ptplad1   | protein tyrosine phosphatase-like A domain containing 1                                                      | 2 | 0  | 1 |
| 84872191  | Ptplb     | protein tyrosine phosphatase-like protein PTPLB                                                              | 1 | 0  | 0 |
| 226530884 | Pcmt1     | protein-L-isoaspartate (D-aspartate) O-methyltransferase 1                                                   | 4 | 0  | 0 |
| 23956398  | Pcmt2     | protein-L-isoaspartate (D-aspartate) O-methyltransferase domain containing 2                                 | 0 | 1  | 0 |
| 9790169   | Plp2      | proteolipid protein 2                                                                                        | 1 | 0  | 2 |
| 7110705   | Ptma      | prothymosin alpha                                                                                            | 6 | 0  | 0 |
| 157426851 | Pcdh19    | protocadherin 19 isoform a                                                                                   | 0 | 0  | 1 |
| 18087769  | Pcdhga9   | protocadherin gamma subfamily A, 9                                                                           | 1 | 0  | 0 |
| 148747543 | Pcdhgb1   | protocadherin gamma subfamily B, 1                                                                           | 1 | 0  | 0 |
| 40254503  | Prpf18    | PRP18 pre-mRNA processing factor 18 homolog                                                                  | 1 | 2  | 0 |
| 31980657  | Prpf3     | PRP3 pre-mRNA processing factor 3 homolog                                                                    | 3 | 12 | 0 |
| 228480238 | Prpf31    | PRP31 pre-mRNA processing factor 31 isoform 1                                                                | 5 | 14 | 1 |
| 227497256 | Prpf38a   | PRP38 pre-mRNA processing factor 38 (yeast) domain containing A                                              | 0 | 2  | 5 |
| 30794464  | Prpf38b   | PRP38 pre-mRNA processing factor 38 (yeast) domain containing B                                              | 0 | 12 | 0 |
| 55925589  | Prpf4     | PRP4 pre-mRNA processing factor 4 homolog                                                                    | 0 | 22 | 5 |
| 158854005 | Prpf4b    | PRP4 pre-mRNA processing factor 4 homolog B                                                                  | 1 | 10 | 2 |
| 27597069  | Prune     | prune                                                                                                        | 2 | 0  | 1 |
| 13384608  | Pcbd1     | pterin 4 alpha carbinolamine dehydratase/dimerization cofactor of hepatocyte nuclear factor 1 alpha (TCF1) 1 | 6 | 2  | 0 |
| 52421794  | Pcbd2     | pterin-4 alpha-carbinolamine dehydratase 2                                                                   | 1 | 0  | 0 |
| 30425042  | Ptk7      | PTK7 protein tyrosine kinase 7                                                                               | 2 | 0  | 0 |
| 281371356 | Ppfbp1    | PTPRF interacting protein, binding protein 1 (liprin beta 1)                                                 | 1 | 0  | 0 |
| 66773206  | Ergic2    | PTX1 protein isoform 1                                                                                       | 1 | 0  | 0 |
| 227430386 | Pum1      | pumilio 1 isoform 1                                                                                          | 0 | 1  | 0 |
| 6679573   | Pura      | purine rich element binding protein A                                                                        | 3 | 4  | 1 |
| 6755252   | Purb      | purine rich element binding protein B                                                                        | 5 | 5  | 3 |
| 71043934  | D4Ertd22e | putative MAPK activating protein PM20,PM21 isoform 1                                                         | 1 | 0  | 0 |
| 87116677  | Tmco1     | putative membrane protein                                                                                    | 2 | 1  | 2 |
| 27228990  | Snrnp27   | putative nucleic acid binding protein RY-1                                                                   | 0 | 4  | 0 |
| 88853588  | Cd320     | putative VLDL lipoprotein receptor precursor                                                                 | 0 | 0  | 1 |

|           |           |                                                                 |    |    |    |
|-----------|-----------|-----------------------------------------------------------------|----|----|----|
| 30102930  | Pwp2      | PWP2 periodic tryptophan protein homolog                        | 1  | 4  | 4  |
| 72535128  | Pxk       | PX domain containing serine/threonine kinase short isoform      | 0  | 1  | 0  |
| 26006861  | Pdxk      | pyridoxal (pyridoxine, vitamin B6) kinase                       | 1  | 0  | 0  |
| 88758584  | Pdxdc1    | pyridoxal-dependent decarboxylase domain containing 1 isoform 1 | 5  | 0  | 5  |
| 19527238  | Pnpo      | pyridoxine 5'-phosphate oxidase                                 | 0  | 0  | 1  |
| 27754065  | Ppa1      | pyrophosphatase 1                                               | 1  | 0  | 0  |
| 19526878  | Pycr2     | pyrroline-5-carboxylate reductase family, member 2              | 16 | 25 | 26 |
| 119508439 | Pycr1     | pyrroline-5-carboxylate reductase-like                          | 2  | 0  | 0  |
| 255958292 | Aldh18a1  | pyrroline-5-carboxylate synthetase isoform 1                    | 20 | 23 | 7  |
| 251823980 | Pcx       | pyruvate carboxylase isoform 2                                  | 35 | 0  | 0  |
| 18152793  | Pdhb      | pyruvate dehydrogenase (lipoamide) beta                         | 7  | 5  | 4  |
| 28201978  | Pdhx      | pyruvate dehydrogenase complex, component X                     | 2  | 0  | 0  |
| 6679261   | Pdha1     | pyruvate dehydrogenase E1 alpha 1                               | 15 | 4  | 0  |
| 110625975 | Pdk1      | pyruvate dehydrogenase kinase 1                                 | 8  | 10 | 0  |
| 226958643 | Pdk2      | pyruvate dehydrogenase kinase 2                                 | 1  | 0  | 0  |
| 21704122  | Pdk3      | pyruvate dehydrogenase kinase 3                                 | 2  | 6  | 0  |
| 31981562  | Pkm2      | pyruvate kinase, muscle                                         | 38 | 5  | 14 |
| 226958440 | Qk        | quaking protein isoform 3                                       | 0  | 2  | 1  |
| 21312520  | Qdpr      | quinoid dihydropteridine reductase                              | 1  | 0  | 0  |
| 33859558  | Rabac1    | Rab acceptor 1                                                  | 1  | 0  | 0  |
| 254553295 | Rabggtb   | RAB geranylgeranyltransferase, beta subunit isoform 1           | 1  | 0  | 0  |
| 6679587   | Rab1      | RAB1, member RAS oncogene family                                | 7  | 3  | 4  |
| 7710086   | Rab10     | RAB10, member RAS oncogene family                               | 8  | 0  | 4  |
| 242247151 | Rab11fip3 | RAB11 family interacting protein 3 (class II) isoform 1         | 0  | 0  | 1  |
| 6679583   | Rab11b    | RAB11B, member RAS oncogene family                              | 11 | 7  | 9  |
| 28202067  | Rab11fip4 | Rab11-FIP4-like                                                 | 0  | 1  | 0  |
| 18390323  | Rab14     | RAB14, member RAS oncogene family                               | 9  | 6  | 7  |
| 229577224 | Rab17     | RAB17, member RAS oncogene family                               | 1  | 0  | 0  |
| 30841008  | Rab18     | RAB18, member RAS oncogene family                               | 4  | 0  | 1  |
| 21313162  | Rab1b     | RAB1B, member RAS oncogene family                               | 4  | 0  | 3  |
| 33859751  | Rab21     | RAB21, member RAS oncogene family                               | 6  | 0  | 3  |
| 148747177 | Rab22a    | RAB22A, member RAS oncogene family                              | 1  | 0  | 1  |
| 6679591   | Rab24     | RAB24, member RAS oncogene family                               | 1  | 0  | 0  |
| 31980838  | Rab25     | RAB25, member RAS oncogene family                               | 7  | 0  | 7  |
| 13128964  | Rab27a    | RAB27A protein                                                  | 1  | 1  | 0  |
| 13385896  | Rab32     | RAB32                                                           | 0  | 0  | 1  |
| 37718983  | Rab35     | RAB35, member RAS oncogene family                               | 0  | 2  | 8  |
| 261862303 | Rab3a     | RAB3A, member RAS oncogene family                               | 1  | 0  | 0  |
| 15042957  | Rab3d     | RAB3D, member RAS oncogene family                               | 2  | 0  | 0  |
| 171184402 | Rab4a     | RAB4A, member RAS oncogene family                               | 1  | 0  | 0  |
| 13385374  | Rab5a     | RAB5A, member RAS oncogene family                               | 4  | 0  | 1  |
| 113866024 | Rab5c     | RAB5C, member RAS oncogene family                               | 7  | 1  | 6  |
| 254750706 | Rab6      | RAB6A, member RAS oncogene family isoform 2                     | 3  | 0  | 3  |
| 120300971 | Erc1      | Rab6-interacting protein 2 isoform 1                            | 0  | 3  | 1  |
| 148747526 | Rab7      | RAB7, member RAS oncogene family                                | 13 | 3  | 6  |
| 27734154  | Rab8b     | RAB8B, member RAS oncogene family                               | 2  | 1  | 1  |
| 31559945  | Rabepk    | Rab9 effector protein with kelch motifs                         | 1  | 0  | 0  |
| 9790227   | Rab9      | RAB9, member RAS oncogene family                                | 3  | 0  | 0  |
| 140970573 | Rabep2    | rabaptin, RAB GTPase binding effector protein 2                 | 3  | 0  | 0  |
| 254692855 | Rad21     | RAD21 homolog                                                   | 0  | 31 | 12 |
| 34447211  | Rad23a    | RAD23a homolog                                                  | 2  | 0  | 1  |
| 171906578 | Rad23b    | RAD23b homolog                                                  | 4  | 2  | 0  |

|           |         |                                                                               |    |    |    |
|-----------|---------|-------------------------------------------------------------------------------|----|----|----|
| 153945822 | Rad50   | RAD50 homolog                                                                 | 0  | 16 | 0  |
| 88319960  | Rad54b  | RAD54 homolog B                                                               | 1  | 0  | 1  |
| 6677725   | Rfng    | radical fringe                                                                | 0  | 1  | 0  |
| 157277952 | Rdx     | radixin isoform b                                                             | 17 | 24 | 3  |
| 28201956  | Rae1    | RAE1 RNA export 1 homolog                                                     | 0  | 5  | 4  |
| 229577175 | Ralgps2 | Ral-A exchange factor RalGPS2                                                 | 1  | 0  | 0  |
| 31982627  | Rgl3    | RalGDS-like protein 3                                                         | 3  | 0  | 4  |
| 153792001 | Ranbp1  | RAN binding protein 1                                                         | 4  | 2  | 1  |
| 153792534 | Ranbp2  | RAN binding protein 2                                                         | 3  | 35 | 18 |
| 83523744  | Ranbp3  | RAN binding protein 3                                                         | 2  | 0  | 1  |
| 53850664  | Ranbp6  | RAN binding protein 6                                                         | 0  | 1  | 0  |
| 161353515 | Ranbp9  | RAN binding protein 9                                                         | 0  | 0  | 1  |
| 226062635 | Rangap1 | RAN GTPase activating protein 1                                               | 5  | 9  | 5  |
| 6678365   | Ran     | RAN, member RAS oncogene family                                               | 7  | 8  | 7  |
| 40804757  | Ranbp10 | Ran-binding protein 10                                                        | 2  | 0  | 0  |
| 19745156  | lpo4    | RANBP4                                                                        | 3  | 1  | 2  |
| 84875506  | Rapgef1 | Rap guanine nucleotide exchange factor (GEF) 1 isoform 1                      | 1  | 0  | 0  |
| 13386338  | Rap2b   | RAP2B, member of RAS oncogene family                                          | 1  | 0  | 0  |
| 154146249 | Rptor   | raptor                                                                        | 1  | 0  | 1  |
| 21703974  | Rin1    | Ras and Rab interactor 1                                                      | 1  | 0  | 0  |
| 145587080 | Raph1   | Ras association (RalGDS/AF-6) and pleckstrin homology domains 1               | 1  | 0  | 0  |
| 110431380 | Rassf6  | Ras association (RalGDS/AF-6) domain family member 6                          | 0  | 0  | 1  |
| 28626508  | Rheb    | Ras homolog enriched in brain                                                 | 0  | 0  | 1  |
| 31542143  | Rhoa    | ras homolog gene family, member A                                             | 3  | 2  | 2  |
| 6680726   | Rheb    | ras homolog gene family, member B                                             | 3  | 3  | 3  |
| 160415213 | Rhoc    | ras homolog gene family, member C                                             | 3  | 4  | 7  |
| 9625037   | Rhog    | ras homolog gene family, member G                                             | 0  | 0  | 1  |
| 34328361  | Rhoq    | ras homolog gene family, member Q                                             | 1  | 1  | 1  |
| 22122457  | Rhot2   | ras homolog gene family, member T2                                            | 2  | 0  | 3  |
| 33859753  | Rap1b   | RAS related protein 1b                                                        | 1  | 6  | 8  |
| 34328471  | Rala    | ras related v-ral simian leukemia viral oncogene homolog A                    | 3  | 4  | 4  |
| 295424118 | Rreb1   | ras responsive element binding protein 1 isoform 1                            | 0  | 2  | 0  |
| 31982028  | Rsu1    | Ras suppressor protein 1                                                      | 1  | 5  | 2  |
| 21311975  | Rab13   | RAS-associated protein RAB13                                                  | 1  | 2  | 3  |
| 124248579 | G3bp2   | Ras-GTPase-activating protein (GAP120) SH3-domain binding protein 2 isoform a | 6  | 5  | 0  |
| 110625708 | Rasl11b | RAS-like, family 11, member B                                                 | 0  | 0  | 1  |
| 45592934  | Rac1    | RAS-related C3 botulinum substrate 1                                          | 3  | 6  | 7  |
| 31541819  | Rraga   | Ras-related GTP binding A                                                     | 1  | 0  | 0  |
| 21704066  | Rap1a   | RAS-related protein-1a                                                        | 1  | 2  | 3  |
| 29789209  | Raver1  | Raver1                                                                        | 0  | 8  | 13 |
| 226693374 | Rb1cc1  | RB1-inducible coiled-coil 1                                                   | 1  | 0  | 0  |
| 33239431  | Rcc2    | RCC1-like                                                                     | 0  | 19 | 0  |
| 124486604 | Rif     | rearranged L-myc fusion sequence                                              | 1  | 0  | 1  |
| 161016826 | Reep5   | receptor accessory protein 5                                                  | 5  | 0  | 0  |
| 188497726 | Rag1ap1 | recombination activating gene 1 activating protein 1                          | 1  | 0  | 1  |
| 124286787 | Rbpj    | recombining binding protein suppressor of hairless isoform 1                  | 0  | 9  | 0  |
| 326368226 | Recql   | RecQ protein-like                                                             | 0  | 0  | 1  |
| 19527092  | Rcc1    | regulator of chromosome condensation 1                                        | 0  | 16 | 6  |
| 124486718 | Rgs11   | regulator of G-protein signaling 11                                           | 0  | 1  | 0  |
| 160948569 | Rgs3    | regulator of G-protein signaling 3 isoform 2                                  | 0  | 1  | 0  |

|           |          |                                                          |    |    |    |
|-----------|----------|----------------------------------------------------------|----|----|----|
| 170784813 | Upf1     | regulator of nonsense transcripts 1 isoform b            | 5  | 0  | 4  |
| 165972315 | Rras2    | related RAS viral (r-ras) oncogene homolog 2             | 1  | 1  | 2  |
| 11177922  | Rfc2     | replication factor C (activator 1) 2                     | 1  | 8  | 1  |
| 124249204 | Rfc3     | replication factor C (activator 1) 3                     | 3  | 5  | 3  |
| 21703948  | Rfc4     | replication factor C (activator 1) 4                     | 0  | 9  | 3  |
| 188219597 | Rfc1     | replication factor C 1                                   | 0  | 4  | 1  |
| 110625924 | Rfc5     | replication factor C 5                                   | 7  | 13 | 3  |
| 255982530 | Rpa1     | replication protein A1                                   | 5  | 1  | 0  |
| 110625961 | Rpa2     | replication protein A2                                   | 3  | 1  | 1  |
| 13386122  | Rpa3     | replication protein A3                                   | 3  | 2  | 0  |
| 13385882  | Rer1     | RER1 homolog                                             | 0  | 0  | 1  |
| 39930559  | Rcor1    | REST corepressor 1                                       | 0  | 9  | 1  |
| 57634523  | Rcor3    | REST corepressor 3                                       | 0  | 2  | 1  |
| 23821025  | Clip1    | restin                                                   | 0  | 4  | 1  |
| 114205428 | Rcn2     | reticulocalbin 2                                         | 4  | 0  | 0  |
| 54607016  | Rtn3     | reticulon 3 isoform 4                                    | 4  | 2  | 3  |
| 34610241  | Rtn4     | reticulon 4 isoform D                                    | 16 | 0  | 0  |
| 19526820  | Rp2h     | retinitis pigmentosa 2 homolog                           | 0  | 0  | 1  |
| 37694072  | Arid4b   | retinoblastoma binding protein 1-like 1 isoform 1        | 0  | 2  | 0  |
| 47059484  | Rbbp4    | retinoblastoma binding protein 4                         | 3  | 18 | 10 |
| 164450487 | Rbbp5    | retinoblastoma binding protein 5                         | 0  | 12 | 0  |
| 163937858 | Rbbp6    | retinoblastoma binding protein 6 isoform 1               | 0  | 1  | 1  |
| 157909799 | Rbbp7    | retinoblastoma binding protein 7                         | 3  | 12 | 4  |
| 237820660 | Zubr1    | retinoblastoma-associated factor 600 isoform 1           | 11 | 1  | 0  |
| 168823452 | D14Abb1e | retinoblastoma-associated protein 140 isoform 1          | 0  | 1  | 1  |
| 124487105 | Arid4a   | retinoblastoma-binding protein 1                         | 0  | 3  | 0  |
| 213417872 | Rbl1     | retinoblastoma-like protein 1 isoform 1                  | 0  | 1  | 2  |
| 257196165 | Rai16    | retinoic acid induced 16                                 | 0  | 1  | 0  |
| 6755384   | Rxra     | retinoid X receptor alpha                                | 1  | 1  | 0  |
| 25141231  | Rdh10    | retinol dehydrogenase 10                                 | 0  | 0  | 1  |
| 19482172  | Rdh11    | retinol dehydrogenase 11                                 | 4  | 0  | 1  |
| 30425078  | Rdh13    | retinol dehydrogenase 13                                 | 1  | 0  | 4  |
| 40254551  | Rev1     | REV1-like                                                | 0  | 0  | 1  |
| 229092834 | Rhcg     | Rhesus blood group-associated C glycoprotein             | 0  | 0  | 1  |
| 13386354  | Rnd3     | Rho family GTPase 3                                      | 1  | 0  | 0  |
| 31982030  | Arhgdia  | Rho GDP dissociation inhibitor (GDI) alpha               | 9  | 2  | 3  |
| 225543420 | Arhgap1  | Rho GTPase activating protein 1 isoform 2                | 5  | 0  | 3  |
| 254750666 | Arhgap19 | Rho GTPase activating protein 19 isoform 1               | 0  | 1  | 0  |
| 203097667 | Arhgap21 | Rho GTPase activating protein 21 isoform 1               | 0  | 0  | 1  |
| 33563303  | Arhgap29 | Rho GTPase activating protein 29                         | 1  | 0  | 0  |
| 86262151  | Arhgap5  | Rho GTPase activating protein 5                          | 0  | 1  | 0  |
| 194306553 | Arhgef1  | Rho guanine nucleotide exchange factor (GEF) 1 isoform a | 0  | 0  | 1  |
| 51491850  | Arhgef11 | Rho guanine nucleotide exchange factor (GEF) 11          | 0  | 0  | 2  |
| 163838664 | Arhgef16 | Rho guanine nucleotide exchange factor (GEF) 16          | 0  | 2  | 0  |
| 124487439 | Arhgef17 | Rho guanine nucleotide exchange factor (GEF) 17          | 0  | 0  | 1  |
| 33563236  | Arhgdib  | Rho, GDP dissociation inhibitor (GDI) beta               | 6  | 0  | 0  |
| 312032462 | Arhgef2  | rho/rac guanine nucleotide exchange factor (GEF) 2       | 2  | 0  | 1  |
| 134949013 | Rock2    | Rho-associated coiled-coil forming kinase 2              | 0  | 14 | 0  |
| 6677759   | Rock1    | Rho-associated, coiled-coil containing protein kinase 1  | 0  | 0  | 1  |
| 170014732 | Rhbdd1   | rhomboid domain containing 1                             | 1  | 0  | 0  |
| 229092577 | Rhpn2    | rhophilin, Rho GTPase binding protein 2                  | 1  | 0  | 0  |
| 209977095 | Rtkn     | rhotekin isoform b                                       | 1  | 0  | 1  |
| 58037097  | Rnaseh2b | ribonuclease H2, subunit B                               | 0  | 1  | 0  |

|           |          |                                               |    |    |    |
|-----------|----------|-----------------------------------------------|----|----|----|
| 194328670 | Rnasen   | ribonuclease III, nuclear                     | 0  | 1  | 0  |
| 13385432  | Rpp14    | ribonuclease P 14kDa subunit                  | 1  | 4  | 0  |
| 257196209 | Rpp30    | ribonuclease P/MRP 30kDa subunit              | 1  | 6  | 0  |
| 145279200 | Rnaset2a | ribonuclease T2A                              | 4  | 0  | 0  |
| 285402659 | Rnh1     | ribonuclease/angiogenin inhibitor 1           | 1  | 0  | 0  |
| 121674793 | Rnps1    | ribonucleic acid binding protein S1 isoform 2 | 0  | 2  | 4  |
| 282398108 | Rpn1     | ribophorin I                                  | 31 | 2  | 14 |
| 34996495  | Rpn2     | ribophorin II                                 | 19 | 2  | 17 |
| 30794470  | Rsl1d1   | ribosomal L1 domain containing 1              | 1  | 6  | 14 |
| 16418339  | Rpl10    | ribosomal protein 10                          | 8  | 2  | 9  |
| 255003735 | Rpl10a   | ribosomal protein L10A                        | 10 | 2  | 7  |
| 13385408  | Rpl11    | ribosomal protein L11                         | 4  | 8  | 5  |
| 160333553 | Rpl12    | ribosomal protein L12                         | 2  | 6  | 6  |
| 33186863  | Rpl13    | ribosomal protein L13                         | 5  | 1  | 4  |
| 31981945  | Rpl13a   | ribosomal protein L13A                        | 4  | 1  | 5  |
| 13385472  | Rpl14    | ribosomal protein L14                         | 1  | 1  | 5  |
| 13385036  | Rpl15    | ribosomal protein L15                         | 3  | 4  | 9  |
| 161484662 | Rpl17    | ribosomal protein L17                         | 4  | 2  | 6  |
| 83699424  | Rpl18    | ribosomal protein L18                         | 7  | 6  | 7  |
| 58037465  | Rpl18a   | ribosomal protein L18A                        | 1  | 0  | 1  |
| 226958653 | Rpl19    | ribosomal protein L19 isoform 1               | 3  | 1  | 3  |
| 6677775   | Rpl22    | ribosomal protein L22                         | 1  | 4  | 3  |
| 13386010  | Rpl22l1  | ribosomal protein L22 like 1                  | 1  | 3  | 2  |
| 12584986  | Rpl23    | ribosomal protein L23                         | 1  | 3  | 3  |
| 46430508  | Rpl23a   | ribosomal protein L23a                        | 7  | 9  | 8  |
| 18250296  | Rpl24    | ribosomal protein L24                         | 5  | 3  | 6  |
| 38348464  | BC003885 | ribosomal protein L24-like                    | 0  | 0  | 1  |
| 6677777   | Rpl26    | ribosomal protein L26                         | 5  | 4  | 5  |
| 8567400   | Rpl27    | ribosomal protein L27                         | 2  | 7  | 6  |
| 31560517  | Rpl27a   | ribosomal protein L27a                        | 4  | 1  | 4  |
| 6677779   | Rpl28    | ribosomal protein L28                         | 4  | 1  | 4  |
| 6677781   | Rpl29    | ribosomal protein L29                         | 3  | 0  | 1  |
| 255308899 | Rpl3     | ribosomal protein L3                          | 3  | 4  | 5  |
| 254553337 | Rpl30    | ribosomal protein L30                         | 3  | 5  | 4  |
| 16716589  | Rpl31    | ribosomal protein L31                         | 3  | 4  | 2  |
| 25742730  | Rpl32    | ribosomal protein L32                         | 1  | 0  | 2  |
| 55742885  | Rpl34    | ribosomal protein L34 isoform 2               | 5  | 1  | 2  |
| 13385044  | Rpl35    | ribosomal protein L35                         | 1  | 1  | 2  |
| 194440715 | Rpl35a   | ribosomal protein L35a                        | 4  | 1  | 1  |
| 13385038  | Rpl36al  | ribosomal protein L36A-like                   | 1  | 1  | 1  |
| 6677785   | Rpl37a   | ribosomal protein L37a                        | 1  | 2  | 2  |
| 114205444 | Rpl38    | ribosomal protein L38                         | 5  | 5  | 3  |
| 13385552  | Rpl39    | ribosomal protein L39                         | 1  | 0  | 0  |
| 30794450  | Rpl4     | ribosomal protein L4                          | 19 | 0  | 13 |
| 23956082  | Rpl5     | ribosomal protein L5                          | 2  | 9  | 4  |
| 84662736  | Rpl6     | ribosomal protein L6                          | 1  | 1  | 10 |
| 31981515  | Rpl7     | ribosomal protein L7                          | 6  | 4  | 13 |
| 7305443   | Rpl7a    | ribosomal protein L7A                         | 1  | 2  | 13 |
| 27754134  | Rpl7l1   | ribosomal protein L7-like 1                   | 0  | 0  | 4  |
| 6755358   | Rpl8     | ribosomal protein L8                          | 6  | 2  | 4  |
| 14149647  | Rpl9     | ribosomal protein L9                          | 1  | 10 | 7  |
| 13399310  | Rps10    | ribosomal protein S10                         | 6  | 9  | 3  |
| 21426889  | Rps11    | ribosomal protein S11                         | 4  | 6  | 9  |
| 40254577  | Rps12    | ribosomal protein S12                         | 1  | 7  | 0  |



|           |               |                                                |    |    |    |
|-----------|---------------|------------------------------------------------|----|----|----|
| 13386034  | Rps13         | ribosomal protein S13                          | 5  | 3  | 4  |
| 31981100  | Rps14         | ribosomal protein S14                          | 5  | 7  | 4  |
| 6677799   | Rps15         | ribosomal protein S15                          | 2  | 1  | 2  |
| 24762230  | Rps15a        | ribosomal protein S15A                         | 3  | 6  | 6  |
| 158966704 | Rps16         | ribosomal protein S16                          | 8  | 6  | 7  |
| 6677801   | Rps17         | ribosomal protein S17                          | 5  | 5  | 4  |
| 6755368   | Rps18         | ribosomal protein S18                          | 7  | 7  | 8  |
| 12963511  | Rps19         | ribosomal protein S19                          | 1  | 7  | 1  |
| 18087805  | Rps2          | ribosomal protein S2                           | 4  | 6  | 10 |
| 13385652  | Rps20         | ribosomal protein S20                          | 2  | 4  | 1  |
| 21536222  | Rps21         | ribosomal protein S21                          | 4  | 2  | 0  |
| 46519160  | Rps24         | ribosomal protein S24 isoform 2                | 3  | 2  | 4  |
| 28372479  | Rps25         | ribosomal protein S25                          | 5  | 5  | 3  |
| 26024336  | Rps27         | ribosomal protein S27                          | 3  | 3  | 2  |
| 76443694  | Rps27a        | ribosomal protein S27a                         | 1  | 0  | 1  |
| 13385958  | Rps27l        | ribosomal protein S27-like                     | 2  | 3  | 2  |
| 21426821  | Rps28         | ribosomal protein S28                          | 3  | 2  | 0  |
| 6677803   | Rps29         | ribosomal protein S29                          | 2  | 1  | 1  |
| 6755372   | Rps3          | ribosomal protein S3                           | 16 | 14 | 13 |
| 254553321 | Rps3a         | ribosomal protein S3A                          | 15 | 13 | 8  |
| 6677805   | Rps4x         | ribosomal protein S4, X-linked                 | 5  | 1  | 3  |
| 254675270 | Rps5          | ribosomal protein S5                           | 4  | 8  | 6  |
| 6677809   | Rps6          | ribosomal protein S6                           | 4  | 2  | 6  |
| 158636007 | Rps6ka1       | ribosomal protein S6 kinase polypeptide 1      | 1  | 0  | 0  |
| 9910454   | Rps6ka4       | ribosomal protein S6 kinase, polypeptide 4     | 0  | 0  | 1  |
| 6755376   | Rps7          | ribosomal protein S7                           | 6  | 8  | 7  |
| 6677813   | Rps8          | ribosomal protein S8                           | 10 | 3  | 9  |
| 33504483  | Rps9          | ribosomal protein S9-like                      | 13 | 6  | 12 |
| 224994260 | Rpsa          | ribosomal protein SA                           | 10 | 4  | 3  |
| 83745120  | Rplp2         | ribosomal protein, large P2                    | 6  | 6  | 5  |
| 9256519   | Rplp1         | ribosomal protein, large, P1                   | 1  | 3  | 2  |
| 13384904  | Mrps22        | ribosomal protein, mitochondrial, S22          | 5  | 0  | 0  |
| 254911009 | Rrp1b         | ribosomal RNA processing 1 homolog B isoform 1 | 0  | 2  | 2  |
| 124486712 | Rrbp1         | ribosome binding protein 1 isoform a           | 8  | 15 | 0  |
| 62530188  | Ahsa2         | RIKEN cDNA 1110064P04                          | 0  | 1  | 0  |
| 21313668  | 2310001A20Rik | RIKEN cDNA 2310001A20                          | 9  | 0  | 0  |
| 58037443  | 2310003C23Rik | RIKEN cDNA 2310003C23                          | 1  | 0  | 0  |
| 226342951 | 2310044H10Rik | RIKEN cDNA 2310044H10                          | 1  | 0  | 0  |
| 145207992 | Dis3          | RIKEN cDNA 2810028N01                          | 0  | 5  | 0  |
| 19526956  | 2900064A13Rik | RIKEN cDNA 2900064A13                          | 2  | 0  | 2  |
| 61742810  | Zc3h13        | RIKEN cDNA 3110050K21                          | 0  | 1  | 0  |
| 168480120 | Rictor        | RIKEN cDNA 4921505C17                          | 2  | 0  | 0  |
| 26024211  | Rfwd2         | ring finger and WD repeat domain 2             | 0  | 0  | 1  |
| 21311909  | Rnf6          | ring finger protein (C3H2C3 type) 6            | 1  | 0  | 0  |
| 226958428 | Ring1         | ring finger protein 1                          | 0  | 6  | 0  |
| 187960114 | Rnf103        | ring finger protein 103                        | 0  | 0  | 1  |
| 247301241 | Msl2l1        | ring finger protein 184                        | 0  | 1  | 0  |
| 256225924 | Rnf187        | ring finger protein 187                        | 1  | 0  | 1  |
| 33563274  | Rnf2          | ring finger protein 2                          | 0  | 6  | 1  |
| 253795509 | Rnf20         | ring finger protein 20                         | 0  | 5  | 0  |
| 30519929  | Rnf24         | ring finger protein 24                         | 0  | 1  | 0  |
| 38348308  | Rybp          | RING1 and YY1 binding protein                  | 0  | 4  | 0  |
| 110625737 | Riok3         | RIO kinase 3                                   | 1  | 0  | 0  |
| 13385938  | Rnmt          | RNA (guanine-7-) methyltransferase             | 0  | 3  | 0  |

|           |          |                                                           |   |    |    |
|-----------|----------|-----------------------------------------------------------|---|----|----|
| 21312876  | Rg9mtd1  | RNA (guanine-9-) methyltransferase domain containing 1    | 0 | 1  | 0  |
| 148238335 | Refbp2   | RNA and export factor binding protein 2                   | 1 | 0  | 0  |
| 269847199 | Rbm10    | RNA binding motif protein 10                              | 0 | 3  | 7  |
| 114155125 | Rbm12    | RNA binding motif protein 12                              | 2 | 0  | 0  |
| 86262142  | Rbm14    | RNA binding motif protein 14                              | 1 | 13 | 19 |
| 124249066 | Rbm15    | RNA binding motif protein 15                              | 0 | 5  | 2  |
| 22779924  | Rbm17    | RNA binding motif protein 17                              | 0 | 0  | 2  |
| 30794154  | Rbm19    | RNA binding motif protein 19                              | 0 | 1  | 5  |
| 110625591 | Rbm22    | RNA binding motif protein 22                              | 0 | 1  | 4  |
| 161353449 | Rbm25    | RNA binding motif protein 25                              | 3 | 25 | 9  |
| 123701991 | Rbm26    | RNA binding motif protein 26                              | 0 | 7  | 0  |
| 166235127 | Rbm28    | RNA binding motif protein 28                              | 0 | 0  | 9  |
| 165972311 | Esrp1    | RNA binding motif protein 35A                             | 1 | 2  | 1  |
| 118403314 | Rbm39    | RNA binding motif protein 39                              | 5 | 10 | 7  |
| 22507333  | Rbm5     | RNA binding motif protein 5                               | 0 | 6  | 8  |
| 27753952  | Rbm7     | RNA binding motif protein 7                               | 0 | 2  | 1  |
| 162287294 | Rbm8a    | RNA binding motif protein 8a isoform b                    | 1 | 7  | 8  |
| 161016816 | Rbm9     | RNA binding motif protein 9 isoform 1                     | 1 | 0  | 1  |
| 83699420  | Rbmxt    | RNA binding motif protein, X chromosome retrogene         | 0 | 2  | 5  |
| 262231769 | RbmX     | RNA binding motif protein, X-linked                       | 5 | 7  | 10 |
| 27734072  | RbmX2    | RNA binding motif protein, X-linked 2                     | 0 | 0  | 1  |
| 111185961 | Rbpms    | RNA binding protein gene with multiple splicing isoform 1 | 2 | 7  | 3  |
| 6755364   | Sub1     | RNA polymerase II transcriptional coactivator             | 1 | 5  | 1  |
| 10946950  | Rcl1     | RNA terminal phosphate cyclase-like 1                     | 0 | 3  | 3  |
| 84662758  | Rnpc3    | RNA-binding region (RNP1, RRM) containing 3               | 1 | 1  | 1  |
| 30039680  | Rod1     | ROD1 regulator of differentiation 1 isoform 1             | 2 | 12 | 7  |
| 70794811  | Src      | Rous sarcoma oncogene isoform 1                           | 0 | 3  | 2  |
| 227908779 | Rrs1     | RRS1 ribosome biogenesis regulator homolog                | 0 | 0  | 3  |
| 21312036  | Rufy3    | RUN and FYVE domain containing 3                          | 1 | 0  | 0  |
| 9790083   | Ruvbl1   | RuvB-like protein 1                                       | 7 | 13 | 11 |
| 6755382   | Ruvbl2   | RuvB-like protein 2                                       | 9 | 21 | 9  |
| 226443099 | Srbd1    | S1 RNA binding domain 1                                   | 0 | 6  | 0  |
| 6677833   | S100a10  | S100 calcium binding protein A10                          | 2 | 1  | 0  |
| 21886811  | S100a11  | S100 calcium binding protein A11 (calizzarin)             | 3 | 0  | 2  |
| 6677835   | S100a13  | S100 calcium binding protein A13                          | 1 | 1  | 0  |
| 254587910 | S100a14  | S100 calcium binding protein A14 isoform a                | 1 | 3  | 4  |
| 21312760  | S100a16  | S100 calcium binding protein A16                          | 2 | 3  | 6  |
| 6755392   | S100a6   | S100 calcium binding protein A6 (calcyclin)               | 3 | 2  | 2  |
| 30424711  | Rps19bp1 | S19 binding protein                                       | 1 | 2  | 1  |
| 13507622  | Sacm1l   | SAC1 (supressor of actin mutations 1, homolog)-like       | 7 | 0  | 0  |
| 119508435 | Sac3d1   | SAC3 domain containing 1                                  | 0 | 1  | 0  |
| 257153336 | Nip7     | Saccharomyces cerevisiae Nip7p homolog                    | 0 | 9  | 3  |
| 262263372 | Ahcy     | S-adenosylhomocysteine hydrolase                          | 6 | 0  | 0  |
| 213418079 | Samhd1   | SAM domain- and HD domain-containing protein 1 isoform 1  | 4 | 6  | 1  |
| 124487193 | Sap30l   | SAP30-like                                                | 0 | 1  | 0  |
| 255918184 | Saps3    | SAPS domain family, member 3                              | 1 | 0  | 1  |
| 21703344  | Sar1a    | SAR1a gene homolog                                        | 2 | 0  | 2  |
| 21313476  | Sar1b    | SAR1a gene homolog 2                                      | 3 | 0  | 5  |
| 56605992  | Slmap    | sarcolemma associated protein                             | 2 | 1  | 0  |
| 153945866 | Safb2    | scaffold attachment factor B2                             | 0 | 13 | 12 |
| 134053873 | Scand3   | SCAN domain containing 3                                  | 1 | 3  | 0  |

|           |               |                                                                                        |    |    |    |
|-----------|---------------|----------------------------------------------------------------------------------------|----|----|----|
| 6680878   | Scarb2        | scavenger receptor class B, member 2                                                   | 5  | 0  | 0  |
| 70909345  | Scel          | sciellin                                                                               | 1  | 1  | 1  |
| 226246552 | Scin          | scinderin isoform 1                                                                    | 19 | 17 | 15 |
| 238550155 | Sost          | sclerostin                                                                             | 0  | 0  | 1  |
| 58037481  | Scfd1         | Sec1 family domain containing 1                                                        | 17 | 1  | 5  |
| 9910550   | Sec11a        | Sec11-like 1                                                                           | 3  | 1  | 2  |
| 29150272  | Sec13         | SEC13-like 1                                                                           | 0  | 6  | 1  |
| 84875515  | Seh1l         | sec13-like protein isoform a                                                           | 0  | 7  | 2  |
| 30425210  | Sestd1        | SEC14 and spectrin domains 1                                                           | 1  | 0  | 1  |
| 6755448   | Sec22b        | SEC22 vesicle trafficking protein-like 1                                               | 8  | 1  | 8  |
| 254692911 | Sec23ip       | Sec23 interacting protein                                                              | 0  | 1  | 0  |
| 67906177  | Sec23a        | SEC23A                                                                                 | 2  | 0  | 0  |
| 31980969  | Sec23b        | SEC23B                                                                                 | 1  | 0  | 0  |
| 116174774 | Sec24a        | SEC24 related gene family, member A                                                    | 1  | 0  | 0  |
| 46402179  | Sec24b        | Sec24 related gene family, member B                                                    | 1  | 0  | 0  |
| 269954700 | Sec24c        | Sec24 related gene family, member C                                                    | 5  | 0  | 0  |
| 244791271 | Sec31a        | SEC31-like 1                                                                           | 3  | 0  | 1  |
| 8394252   | Sec61a1       | Sec61 alpha subunit homolog                                                            | 5  | 1  | 3  |
| 13324684  | Sec61b        | Sec61 beta subunit                                                                     | 3  | 2  | 1  |
| 10946604  | Sec61a2       | Sec61, alpha subunit 2                                                                 | 4  | 0  | 3  |
| 158517836 | Sec61g        | SEC61, gamma subunit isoform 1                                                         | 1  | 0  | 0  |
| 158937300 | Sec63         | SEC63-like protein                                                                     | 1  | 0  | 0  |
| 58037395  | Scamp1        | secretory carrier membrane protein 1                                                   | 2  | 0  | 0  |
| 118601011 | Scamp3        | secretory carrier membrane protein 3                                                   | 4  | 0  | 0  |
| 84875513  | Sel1l         | Sel1 (suppressor of lin-12) 1 homolog isoform a                                        | 7  | 0  | 0  |
| 22164798  | Selenbp1      | selenium binding protein 1                                                             | 6  | 0  | 0  |
| 156713463 | Sephs1        | selenophosphate synthetase 1                                                           | 0  | 2  | 0  |
| 82546883  | 2700094K13Rik | selenoprotein H                                                                        | 1  | 8  | 0  |
| 111119001 | Selk          | selenoprotein K                                                                        | 1  | 0  | 0  |
| 143770878 | 2810407C02Rik | selenoprotein T                                                                        | 1  | 0  | 0  |
| 31543683  | Sema3f        | sema domain, immunoglobulin domain (Ig), short basic domain, secreted, (semaphorin) 3F | 0  | 1  | 1  |
| 110625636 | Sema4b        | semaphorin 4B precursor                                                                | 0  | 0  | 1  |
| 49274623  | Sema4d        | semaphorin 4D                                                                          | 0  | 0  | 1  |
| 160333789 | Spr           | sepiapterin reductase                                                                  | 6  | 0  | 0  |
| 226442740 | Sept10        | septin 10 isoform 2                                                                    | 0  | 4  | 1  |
| 57634518  | Sept11        | septin 11                                                                              | 1  | 17 | 0  |
| 228480255 | Sept2         | septin 2 a                                                                             | 4  | 13 | 0  |
| 6755120   | Sept4         | septin 4                                                                               | 0  | 6  | 0  |
| 158508501 | Sept5         | septin 5                                                                               | 0  | 6  | 0  |
| 39930477  | Sept8         | septin 8                                                                               | 0  | 8  | 0  |
| 164698483 | Sept9         | septin 9 isoform b                                                                     | 2  | 21 | 0  |
| 6754954   | Sqstm1        | sequestosome 1                                                                         | 1  | 0  | 1  |
| 255759943 | Serpinb6a     | serine (or cysteine) proteinase inhibitor, clade B, member 6a                          | 7  | 0  | 0  |
| 6678101   | Serpinb9      | serine (or cysteine) proteinase inhibitor, clade B, member 9                           | 2  | 0  | 0  |
| 161353502 | Serpinh1      | serine (or cysteine) proteinase inhibitor, clade H, member 1                           | 2  | 1  | 3  |
| 253970508 | Scpep1        | serine carboxypeptidase 1                                                              | 7  | 0  | 0  |
| 13443008  | Serhl         | serine hydrolase protein                                                               | 3  | 0  | 1  |
| 21312298  | Shmt2         | serine hydroxymethyltransferase 2 (mitochondrial)                                      | 21 | 14 | 5  |
| 29244577  | Sptlc1        | serine palmitoyltransferase subunit 1                                                  | 2  | 0  | 0  |
| 6755656   | Sptlc2        | serine palmitoyltransferase, long chain base subunit 2                                 | 3  | 1  | 0  |

|           |          |                                                                    |    |    |   |
|-----------|----------|--------------------------------------------------------------------|----|----|---|
| 127139427 | Spint2   | serine protease inhibitor, Kunitz type 2 isoform b                 | 0  | 0  | 1 |
| 194440687 | Srrm1    | serine/arginine repetitive matrix 1 isoform 1                      | 1  | 2  | 0 |
| 126157504 | Srrm2    | serine/arginine repetitive matrix 2                                | 11 | 3  | 1 |
| 31982726  | Srpk1    | serine/arginine-rich protein specific kinase 1                     | 0  | 1  | 0 |
| 47059480  | Srpk2    | serine/arginine-rich protein-specific kinase 2                     | 1  | 0  | 0 |
| 226958539 | Stk16    | serine/threonine kinase 16                                         | 1  | 0  | 1 |
| 257467554 | Slk      | serine/threonine kinase 2                                          | 16 | 0  | 0 |
| 21703922  | Stk24    | serine/threonine kinase 24                                         | 1  | 0  | 0 |
| 89337277  | Stk25    | serine/threonine kinase 25                                         | 2  | 2  | 0 |
| 7106391   | Stk30    | serine/threonine kinase 30                                         | 1  | 0  | 0 |
| 27370078  | Stk38l   | serine/threonine kinase 38 like                                    | 0  | 0  | 1 |
| 160707896 | Strap    | serine/threonine kinase receptor associated protein                | 2  | 4  | 0 |
| 160333312 | BC033915 | serine/threonine-protein kinase QSK                                | 0  | 0  | 1 |
| 32130521  | Sdccag1  | serologically defined colon cancer antigen 1                       | 1  | 0  | 0 |
| 165932377 | Serbp1   | SERPINE1 mRNA binding protein 1 isoform 1                          | 9  | 8  | 0 |
| 148540184 | Srfbp1   | serum response factor binding protein 1                            | 0  | 1  | 1 |
| 326381098 | Sars     | seryl-tRNA synthetase                                              | 10 | 13 | 0 |
| 30840984  | Smyd2    | SET and MYND domain containing 2                                   | 0  | 1  | 0 |
| 119508422 | Setd1a   | SET domain containing 1A                                           | 0  | 2  | 0 |
| 197927225 | Setd2    | SET domain containing 2                                            | 0  | 1  | 1 |
| 268370088 | Setd3    | SET domain containing 3                                            | 1  | 0  | 0 |
| 227499783 | Scmh1    | sex comb on midleg 1 isoform 1                                     | 2  | 0  | 0 |
| 23956176  | Sugt1    | SGT1, suppressor of G2 allele of SKP1                              | 2  | 0  | 1 |
| 154090953 | Ctr9     | SH2 domain binding protein 1 (tetratricopeptide repeat containing) | 0  | 23 | 0 |
| 206597474 | Sh2d4a   | SH2 domain containing 4A                                           | 1  | 0  | 0 |
| 27369694  | Sh3bgrl2 | SH3 domain binding glutamic acid-rich protein like 2               | 0  | 4  | 0 |
| 18017602  | Sh3bgrl3 | SH3 domain binding glutamic acid-rich protein-like 3               | 1  | 3  | 0 |
| 312176405 | ltsn2    | SH3 domain protein 1B                                              | 0  | 3  | 1 |
| 7305487   | Sh3yl1   | Sh3 domain YSC-like 1                                              | 0  | 1  | 0 |
| 114145507 | Sh3rf1   | SH3 multiple domains 2                                             | 1  | 0  | 0 |
| 9910548   | Sh3bgrl  | SH3-binding domain glutamic acid-rich protein like                 | 3  | 0  | 0 |
| 31560792  | Sh3gl2   | SH3-domain GRB2-like 2                                             | 0  | 0  | 1 |
| 9507097   | Sh3glb1  | SH3-domain GRB2-like B1                                            | 3  | 0  | 0 |
| 131889222 | Sdr39u1  | short chain dehydrogenase/reductase family 39U, member 1           | 6  | 0  | 0 |
| 31982522  | Acads    | short-chain acyl-CoA dehydrogenase                                 | 16 | 0  | 0 |
| 94818779  | Shroom4  | shroom family member 4                                             | 0  | 0  | 2 |
| 23956138  | Sbds     | Shwachman-Bodian-Diamond syndrome homolog                          | 0  | 3  | 0 |
| 15147224  | Sfxn1    | sideroflexin 1                                                     | 9  | 0  | 2 |
| 295821212 | Sfxn3    | sideroflexin 3                                                     | 5  | 0  | 1 |
| 13385134  | Spcs2    | signal peptidase complex subunit 2 homolog                         | 4  | 1  | 5 |
| 125988403 | Spcs3    | signal peptidase complex subunit 3                                 | 4  | 2  | 3 |
| 6678133   | Srp14    | signal recognition particle 14                                     | 1  | 1  | 0 |
| 47271535  | Srp68    | signal recognition particle 68                                     | 9  | 0  | 2 |
| 118344452 | Srp72    | signal recognition particle 72                                     | 11 | 1  | 3 |
| 6755662   | Srp9     | signal recognition particle 9                                      | 3  | 2  | 0 |
| 27229036  | Srpr     | signal recognition particle receptor                               | 0  | 0  | 1 |
| 6678137   | Srprb    | signal recognition particle receptor, B subunit                    | 4  | 1  | 1 |
| 165377206 | Ssr1     | signal sequence receptor, alpha                                    | 4  | 1  | 2 |
| 262050625 | Ssr4     | signal sequence receptor, delta                                    | 3  | 3  | 3 |
| 21312968  | Ssr3     | signal sequence receptor, gamma                                    | 1  | 2  | 1 |
| 6755668   | Stam     | signal transducing adaptor molecule (SH3 domain and ITAM motif) 1  | 1  | 0  | 0 |

|           |               |                                                                                                                                                                                        |    |    |    |
|-----------|---------------|----------------------------------------------------------------------------------------------------------------------------------------------------------------------------------------|----|----|----|
| 9789975   | Stam2         | signal transducing adaptor molecule (SH3 domain and ITAM motif) 2                                                                                                                      | 1  | 0  | 0  |
| 269784721 | Sipa111       | signal-induced proliferation-associated 1 like 1                                                                                                                                       | 1  | 0  | 0  |
| 124486630 | Sipa113       | signal-induced proliferation-associated 1 like 3                                                                                                                                       | 0  | 1  | 0  |
| 254540118 | 1110033M05Rik | similar to 1110033M05Rik protein isoform 6                                                                                                                                             | 0  | 1  | 0  |
| 247494016 | 4930422G04Rik | similar to 4930422G04Rik protein                                                                                                                                                       | 1  | 1  | 0  |
| 94364066  | LOC632433     | similar to Arl4c protein                                                                                                                                                               | 1  | 0  | 0  |
| 149253008 | LOC675933     | similar to AT rich interactive domain 1A (Swi1 like)                                                                                                                                   | 0  | 1  | 1  |
| 309271759 | AU042671      | similar to chromosome 12 open reading frame 51                                                                                                                                         | 0  | 0  | 1  |
| 293651623 | EG627788      | similar to cytoplasmic dynein light chain 1                                                                                                                                            | 0  | 0  | 1  |
| 237858808 | AI462493      | similar to Expressed sequence AI462493 isoform 3                                                                                                                                       | 1  | 0  | 0  |
| 254911027 | Nbeal2        | similar to FLJ00341 protein                                                                                                                                                            | 1  | 1  | 1  |
| 309265697 | EG667035      | similar to fusion protein: ubiquitin (bases 43_513); ribosomal protein S27a (bases 217_532)                                                                                            | 1  | 0  | 0  |
| 82996390  | EG433184      | similar to Glyceraldehyde-3-phosphate dehydrogenase (GAPDH)                                                                                                                            | 1  | 0  | 0  |
| 149233991 | D230012E17Rik | similar to GPI inositol-deacylase                                                                                                                                                      | 6  | 0  | 5  |
| 257196179 | Irf2bp2       | similar to interferon regulatory factor 2 binding protein 2                                                                                                                            | 1  | 0  | 0  |
| 254540089 | Prpsap1       | similar to likely ortholog of H. sapiens phosphoribosyl pyrophosphate synthetase-associated protein 1 (PRPSAP1)                                                                        | 7  | 0  | 0  |
| 82965664  | LOC638521     | similar to LOC152217 protein                                                                                                                                                           | 1  | 0  | 0  |
| 254540144 | 2700049A03Rik | similar to mKIAA0586 protein                                                                                                                                                           | 2  | 0  | 0  |
| 256773220 | Synj1         | similar to mKIAA0910 protein                                                                                                                                                           | 1  | 0  | 0  |
| 30527367  | Rbm16         | similar to mKIAA1116 protein isoform 1                                                                                                                                                 | 0  | 1  | 1  |
| 244790458 | D630023B12Rik | similar to mKIAA1450 protein                                                                                                                                                           | 0  | 1  | 0  |
| 237820699 | Mocs3         | similar to molybdenum cofactor synthesis 3                                                                                                                                             | 0  | 0  | 1  |
| 237874229 | Ccdc112       | similar to mutated in bladder cancer 1                                                                                                                                                 | 0  | 0  | 1  |
| 94363510  | EG433297      | similar to MYL6 protein                                                                                                                                                                | 0  | 1  | 1  |
| 254692972 | Cdc42bpa      | similar to myotonic dystrophy kinase-related Cdc42-binding kinase isoform 12                                                                                                           | 1  | 0  | 1  |
| 254588079 | Nat11         | similar to N-acetyltransferase 11 isoform 9                                                                                                                                            | 0  | 2  | 3  |
| 226958612 | Rbm27         | similar to peri implantation stem cell 1 isoform 5                                                                                                                                     | 2  | 0  | 0  |
| 26024309  | Ppat          | similar to Phosphoribosyl pyrophosphate amidotransferase isoform 8                                                                                                                     | 1  | 0  | 0  |
| 242397505 | Zbtb10        | similar to putative RIN zinc finger protein                                                                                                                                            | 0  | 0  | 1  |
| 255003810 | Rab3gap2      | similar to Rab3 GTPase-activating protein non-catalytic subunit (Rab3 GTPase-activating protein 150 kDa subunit) (Rab3-GAP p150) (Rab3-GAP regulatory subunit) (RAB3-GAP150) isoform 4 | 0  | 1  | 1  |
| 226958601 | Golgb1        | similar to rat GCP360 isoform 9                                                                                                                                                        | 26 | 0  | 0  |
| 254028159 | Safb          | similar to Scaffold attachment factor B (Scaffold attachment factor B1) (SAF-B) isoform 18                                                                                             | 1  | 7  | 6  |
| 256017222 | Tmcc1         | similar to Tmcc1 protein isoform 8                                                                                                                                                     | 0  | 1  | 0  |
| 82950513  | EG621629      | similar to Ubxd4 protein                                                                                                                                                               | 0  | 0  | 1  |
| 110625701 | Sigirr        | single Ig IL-1 receptor related protein                                                                                                                                                | 1  | 0  | 0  |
| 47059026  | Ssbp1         | single-stranded DNA binding protein 1 isoform 1                                                                                                                                        | 5  | 0  | 2  |
| 30578432  | Sirt5         | sirtuin 5 (silent mating type information regulation 2 homolog) 5                                                                                                                      | 1  | 0  | 0  |
| 158636012 | Ssb           | Sjogren syndrome antigen B                                                                                                                                                             | 10 | 11 | 12 |
| 110347531 | Mib2          | skeletrophin                                                                                                                                                                           | 1  | 0  | 0  |
| 146149191 | Snw1          | SKI interacting protein                                                                                                                                                                | 6  | 3  | 10 |
| 113205055 | Ski           | Sloan-Kettering viral oncogene homolog                                                                                                                                                 | 1  | 0  | 0  |
| 227430375 | Snip1         | Smad nuclear interacting protein 1                                                                                                                                                     | 1  | 1  | 0  |
| 27229283  | Rexo2         | small fragment nuclease                                                                                                                                                                | 2  | 0  | 0  |

|           |               |                                                                                             |    |    |    |
|-----------|---------------|---------------------------------------------------------------------------------------------|----|----|----|
| 21313588  | Sgta          | small glutamine-rich tetratricopeptide repeat (TPR) containing protein                      | 9  | 0  | 0  |
| 114145487 | Rragc         | small GTPase homolog                                                                        | 2  | 0  | 0  |
| 126012517 | Aimp1         | small inducible cytokine subfamily E, member 1                                              | 12 | 3  | 0  |
| 6678055   | Snrpd1        | small nuclear ribonucleoprotein D1                                                          | 3  | 5  | 5  |
| 58037145  | Snrpd2        | small nuclear ribonucleoprotein D2                                                          | 1  | 7  | 6  |
| 13385598  | Snrpd3        | small nuclear ribonucleoprotein D3                                                          | 2  | 3  | 3  |
| 27883844  | Snrpe         | small nuclear ribonucleoprotein E                                                           | 2  | 5  | 4  |
| 133725813 | Snrpn         | small nuclear ribonucleoprotein N                                                           | 6  | 7  | 8  |
| 114052541 | Snrpa         | small nuclear ribonucleoprotein polypeptide A                                               | 2  | 7  | 3  |
| 254028189 | Snrpf         | small nuclear ribonucleoprotein polypeptide F                                               | 1  | 5  | 3  |
| 13385994  | Snrpg         | small nuclear ribonucleoprotein polypeptide G                                               | 2  | 3  | 2  |
| 30409986  | Snapc1        | small nuclear RNA activating complex, polypeptide 1                                         | 0  | 0  | 1  |
| 7657601   | Solh          | small optic lobes                                                                           | 1  | 0  | 0  |
| 31981251  | 2500003M10Rik | small protein rich in arginine and glycine                                                  | 1  | 2  | 4  |
| 148839318 | Smchd1        | SMC hinge domain containing 1                                                               | 1  | 83 | 7  |
| 258613892 | Smc1a         | SMC1 structural maintenance of chromosomes 1-like 1                                         | 2  | 41 | 29 |
| 24415998  | Smc6          | SMC6 protein                                                                                | 0  | 1  | 8  |
| 46849745  | Smek1         | SMEK homolog 1, suppressor of mek1 isoform 1                                                | 1  | 0  | 0  |
| 262231766 | Smek2         | SMEK homolog 2, suppressor of mek1                                                          | 4  | 0  | 0  |
| 27477043  | Efha1         | Smhs2 homolog                                                                               | 3  | 2  | 1  |
| 6678489   | Sumo1         | SMT3 suppressor of mif two 3 homolog 1                                                      | 0  | 2  | 0  |
| 19111164  | Sumo2         | SMT3 supressor of mif two 3 homolog 2                                                       | 1  | 1  | 0  |
| 227430367 | Smu1          | smu-1 suppressor of mec-8 and unc-52 homolog                                                | 0  | 12 | 14 |
| 257196125 | Snrk          | SNF related kinase                                                                          | 0  | 1  | 0  |
| 324021709 | Lsm2          | snRNP core protein SMX5 isoform 2                                                           | 4  | 7  | 2  |
| 270341361 | Shoc2         | soc-2 (suppressor of clear) homolog                                                         | 1  | 3  | 1  |
| 281371456 | Slc12a9       | solute carrier family 12 (potassium/chloride transporters), member 9                        | 1  | 0  | 0  |
| 19527112  | Slc15a4       | solute carrier family 15, member 4                                                          | 1  | 1  | 0  |
| 6677995   | Slc16a1       | solute carrier family 16, member 1                                                          | 5  | 0  | 1  |
| 165377226 | Slc2a1        | solute carrier family 2 (facilitated glucose transporter), member 1                         | 1  | 0  | 0  |
| 21312994  | Slc25a11      | solute carrier family 25 (mitochondrial carrier oxoglutarate carrier), member 11            | 10 | 1  | 10 |
| 148747424 | Slc25a4       | solute carrier family 25 (mitochondrial carrier, adenine nucleotide translocator), member 4 | 16 | 6  | 13 |
| 254826790 | Slc25a10      | solute carrier family 25 (mitochondrial carrier, dicarboxylate transporter), member 10      | 15 | 0  | 6  |
| 29789024  | Slc25a17      | solute carrier family 25 (mitochondrial carrier, peroxisomal membrane protein), member 17   | 1  | 0  | 1  |
| 19526818  | Slc25a3       | solute carrier family 25 member 3                                                           | 14 | 0  | 10 |
| 23943838  | Slc25a1       | solute carrier family 25, member 1                                                          | 9  | 1  | 7  |
| 27369581  | Slc25a12      | solute carrier family 25, member 12                                                         | 29 | 0  | 11 |
| 294832028 | Slc25a13      | solute carrier family 25, member 13                                                         | 33 | 0  | 14 |
| 49274632  | Slc25a23      | solute carrier family 25, member 23                                                         | 0  | 0  | 1  |
| 22094075  | Slc25a5       | solute carrier family 25, member 5                                                          | 1  | 0  | 1  |
| 45597453  | Slc27a4       | solute carrier family 27 (fatty acid transporter), member 4                                 | 3  | 0  | 0  |
| 238637279 | Slc3a2        | solute carrier family 3, member 2 isoform b                                                 | 3  | 0  | 0  |
| 52630421  | Slc30a4       | solute carrier family 30 (zinc transporter), member 4                                       | 0  | 0  | 1  |
| 31543730  | Slc33a1       | solute carrier family 33 (acetyl-CoA transporter), member 1                                 | 2  | 0  | 0  |
| 21450281  | Slc35a3       | solute carrier family 35 (UDP-N-acetylglucosamine (UDP-GlcNAc) transporter), member 3       | 1  | 0  | 0  |

|           |          |                                                                            |    |     |     |
|-----------|----------|----------------------------------------------------------------------------|----|-----|-----|
| 110625963 | Slc35b2  | solute carrier family 35, member B2                                        | 0  | 1   | 0   |
| 205830420 | Slc39a14 | solute carrier family 39 (zinc transporter), member 14 isoform a           | 1  | 0   | 0   |
| 118150670 | Slc39a7  | solute carrier family 39, member 7                                         | 2  | 0   | 1   |
| 155722992 | Slc4a1ap | solute carrier family 4 (anion exchanger), member 1, adaptor protein       | 0  | 1   | 0   |
| 117320529 | Slc4a7   | solute carrier family 4, sodium bicarbonate cotransporter, member 7        | 0  | 1   | 0   |
| 227499988 | Slc44a1  | solute carrier family 44, member 1 isoform A                               | 5  | 0   | 0   |
| 31982828  | Slc6a6   | solute carrier family 6 (neurotransmitter transporter, taurine), member 6  | 1  | 0   | 0   |
| 6755566   | Slc9a3r1 | solute carrier family 9 (sodium/hydrogen exchanger), isoform 3 regulator 1 | 8  | 5   | 0   |
| 226246650 | Slc9a3r2 | solute carrier family 9 isoform 3 regulator 2 isoform B                    | 1  | 0   | 0   |
| 124378037 | Son      | Son cell proliferation protein                                             | 0  | 5   | 30  |
| 117414170 | Sos1     | son of sevenless 1                                                         | 0  | 1   | 0   |
| 78000179  | Sorbs1   | sorbin and SH3 domain containing 1 isoform 2                               | 0  | 2   | 1   |
| 327315370 | Sorbs2   | sorbin and SH3 domain containing 2                                         | 0  | 3   | 4   |
| 6755504   | Sorbs3   | sorbin and SH3 domain containing 3                                         | 0  | 0   | 2   |
| 124430543 | Sri      | sorcic isoform 2                                                           | 3  | 0   | 1   |
| 34610211  | Sort1    | sortilin 1                                                                 | 5  | 0   | 0   |
| 110625645 | Sorl1    | sortilin-related receptor, LDLR class A repeats-containing                 | 12 | 2   | 0   |
| 30519943  | Samm50   | sorting and assembly machinery component 50 homolog                        | 7  | 0   | 18  |
| 71043944  | Snx1     | sorting nexin 1                                                            | 2  | 0   | 0   |
| 13385878  | Snx2     | sorting nexin 2                                                            | 7  | 0   | 1   |
| 258613896 | Snx25    | sorting nexin 25                                                           | 1  | 1   | 0   |
| 31560433  | Snx3     | sorting nexin 3                                                            | 5  | 0   | 0   |
| 312596940 | Snx5     | sorting nexin 5                                                            | 2  | 0   | 1   |
| 27754031  | Snx6     | sorting nexin 6                                                            | 2  | 0   | 0   |
| 26986581  | Snx8     | sorting nexin 8                                                            | 0  | 1   | 0   |
| 29568084  | Snx9     | sorting nexin 9                                                            | 0  | 2   | 0   |
| 61651673  | Stt3b    | source of immunodominant MHC-associated peptides                           | 2  | 0   | 1   |
| 148536867 | Sp3      | Sp3 transcription factor isoform 2                                         | 0  | 5   | 0   |
| 20070390  | Spg21    | spastic paraplegia 21 homolog                                              | 0  | 1   | 0   |
| 244790112 | Spast    | spastin isoform 2                                                          | 0  | 1   | 0   |
| 295054271 | Spna2    | spectrin alpha 2                                                           | 33 | 163 | 114 |
| 117938334 | Spnb2    | spectrin beta 2 isoform 1                                                  | 8  | 103 | 70  |
| 55926127  | Spnb3    | spectrin beta 3                                                            | 15 | 108 | 85  |
| 116089351 | Abi1     | spectrin SH3 domain binding protein 1 isoform 1                            | 1  | 2   | 0   |
| 120587001 | Spn      | SPEN homolog, transcriptional regulator                                    | 0  | 6   | 1   |
| 148747279 | Spag1    | sperm associated antigen 1                                                 | 1  | 2   | 0   |
| 194473671 | Ssfa2    | sperm specific antigen 2                                                   | 0  | 1   | 1   |
| 114842377 | Strbp    | spermatid perinuclear RNA-binding protein                                  | 1  | 26  | 0   |
| 21313470  | Alkbh7   | spermatogenesis associated 11                                              | 2  | 0   | 0   |
| 20982833  | Spats2   | spermatogenesis associated, serine-rich 2                                  | 0  | 0   | 1   |
| 158854016 | Skp1a    | S-phase kinase-associated protein 1A                                       | 1  | 7   | 2   |
| 257196247 | Smpd4    | sphingomyelin phosphodiesterase 4                                          | 0  | 0   | 11  |
| 19527104  | Smpd3b   | sphingomyelin phosphodiesterase, acid-like 3B                              | 0  | 0   | 1   |
| 270483850 | Sgms1    | sphingomyelin synthase 1                                                   | 0  | 0   | 1   |
| 31543694  | Sgpl1    | sphingosine-1-phosphate lyase 1                                            | 5  | 2   | 3   |
| 13507712  | Sgpp1    | sphingosine-1-phosphate phosphatase 1                                      | 1  | 0   | 0   |
| 21312862  | Spc24    | spindle pole body component 24 homolog                                     | 0  | 1   | 0   |
| 22165378  | Spin1    | spindlin isoform 2                                                         | 0  | 2   | 2   |
| 160707947 | Sf1      | splicing factor 1 isoform 2                                                | 1  | 9   | 2   |

|           |               |                                                                                          |    |    |    |
|-----------|---------------|------------------------------------------------------------------------------------------|----|----|----|
| 165932270 | Sf3a1         | splicing factor 3a, subunit 1                                                            | 11 | 25 | 19 |
| 158749553 | Sf3a2         | splicing factor 3a, subunit 2                                                            | 1  | 8  | 2  |
| 22095003  | Sf3a3         | splicing factor 3a, subunit 3                                                            | 1  | 23 | 15 |
| 13384692  | 0610009D07Rik | splicing factor 3B, 14 kDa subunit                                                       | 1  | 4  | 3  |
| 153791358 | Sf3b1         | splicing factor 3b, subunit 1                                                            | 4  | 39 | 35 |
| 268837785 | Sf3b2         | splicing factor 3b, subunit 2                                                            | 3  | 19 | 28 |
| 19527174  | Sf3b3         | splicing factor 3b, subunit 3                                                            | 13 | 45 | 38 |
| 23346437  | Sf3b4         | splicing factor 3b, subunit 4                                                            | 1  | 5  | 6  |
| 85540445  | Sf3b5         | splicing factor 3b, subunit 5                                                            | 1  | 3  | 2  |
| 28076967  | Sf4           | splicing factor 4                                                                        | 1  | 1  | 2  |
| 23956214  | Sfpq          | splicing factor proline/glutamine rich (polypyrimidine tract binding protein associated) | 12 | 29 | 10 |
| 13385016  | Sfrs9         | splicing factor, arginine/serine rich 9                                                  | 0  | 4  | 10 |
| 118582271 | Sfrs1         | splicing factor, arginine/serine-rich 1 isoform 1                                        | 10 | 12 | 11 |
| 148222073 | Sfrs11        | splicing factor, arginine/serine-rich 11 isoform 2                                       | 0  | 5  | 0  |
| 27369842  | Sfrs12        | splicing factor, arginine/serine-rich 12                                                 | 0  | 3  | 0  |
| 109150409 | Sfrs15        | splicing factor, arginine/serine-rich 15                                                 | 0  | 8  | 1  |
| 6755478   | Sfrs2         | splicing factor, arginine/serine-rich 2                                                  | 2  | 2  | 1  |
| 117647277 | Sfrs2ip       | splicing factor, arginine/serine-rich 2, interacting protein                             | 0  | 16 | 6  |
| 8567402   | Sfrs3         | splicing factor, arginine/serine-rich 3 (SRp20)                                          | 2  | 8  | 8  |
| 165377173 | Sfrs4         | splicing factor, arginine/serine-rich 4                                                  | 1  | 0  | 1  |
| 119226243 | Sfrs5         | splicing factor, arginine/serine-rich 5                                                  | 7  | 6  | 5  |
| 306774103 | Sfrs7         | splicing factor, arginine/serine-rich 7                                                  | 2  | 4  | 6  |
| 78217391  | Sfrs8         | splicing factor, arginine/serine-rich 8                                                  | 0  | 5  | 0  |
| 6755650   | Spry1         | sprouty homolog 1                                                                        | 0  | 1  | 0  |
| 15743554  | Spred1        | sprouty-related protein 1 with EVH-1 domain                                              | 1  | 0  | 0  |
| 124244096 | Sart1         | squamous cell carcinoma antigen recognized by T-cells 1                                  | 10 | 23 | 2  |
| 8394239   | Sart3         | squamous cell carcinoma antigen recognized by T-cells 3                                  | 4  | 0  | 0  |
| 283046784 | 1810035L17Rik | SRA stem-loop-interacting RNA-binding protein                                            | 3  | 2  | 0  |
| 156938293 | Scap          | SREBF chaperone                                                                          | 0  | 0  | 1  |
| 119672912 | Cherp         | SR-related CTD associated factor 6                                                       | 0  | 1  | 3  |
| 55742879  | Stambpl1      | STAM binding protein-like 1                                                              | 1  | 0  | 0  |
| 77404392  | Snd1          | staphylococcal nuclease domain containing 1                                              | 30 | 22 | 0  |
| 9910482   | Stard10       | START domain containing 10                                                               | 1  | 0  | 0  |
| 9789995   | Stmn1         | stathmin 1                                                                               | 1  | 0  | 0  |
| 158186641 | Stau1         | stauflen (RNA binding protein) homolog 1 isoform 3                                       | 2  | 1  | 0  |
| 226958514 | Samd9l        | sterile alpha motif domain containing 9-like isoform 1                                   | 3  | 20 | 2  |
| 87044895  | Srd5a1        | steroid-5-alpha-reductase 1                                                              | 1  | 0  | 1  |
| 45476581  | Scp2          | sterol carrier protein 2, liver                                                          | 10 | 1  | 0  |
| 84619697  | Soat1         | sterol O-acyltransferase 1                                                               | 4  | 0  | 6  |
| 9789907   | Stub1         | STIP1 homology and U-box containing protein 1                                            | 1  | 1  | 0  |
| 7710018   | Stom          | stomatin                                                                                 | 1  | 0  | 0  |
| 12963591  | Stoml2        | stomatin-like protein 2                                                                  | 7  | 0  | 4  |
| 134023662 | Sfn           | stratifin                                                                                | 5  | 0  | 0  |
| 34556193  | Sbno2         | strawberry notch homolog                                                                 | 0  | 0  | 1  |
| 14389431  | Stip1         | stress-induced phosphoprotein 1                                                          | 32 | 5  | 0  |
| 61098078  | Strn          | striatin, calmodulin binding protein                                                     | 4  | 0  | 0  |
| 40254610  | Stag1         | stromal antigen 1                                                                        | 0  | 2  | 4  |
| 118150674 | Stag2         | stromal antigen 2                                                                        | 0  | 24 | 7  |
| 226958306 | Sdf2          | stromal cell derived factor 2                                                            | 1  | 1  | 0  |
| 11612505  | Sdf2l1        | stromal cell-derived factor 2-like 1                                                     | 2  | 3  | 0  |
| 281182368 | Stim2         | stromal interaction molecule 2                                                           | 2  | 0  | 1  |



|           |          |                                                                                                             |    |    |    |
|-----------|----------|-------------------------------------------------------------------------------------------------------------|----|----|----|
| 62990166  | Smc2     | structural maintenance of chromosomes 2                                                                     | 1  | 12 | 0  |
| 29789347  | Smc4     | structural maintenance of chromosomes 4                                                                     | 0  | 7  | 1  |
| 24497433  | Smc5     | structural maintenance of chromosomes 5                                                                     | 1  | 8  | 6  |
| 209862973 | Ssrp1    | structure specific recognition protein 1 isoform 1                                                          | 3  | 16 | 11 |
| 110815822 | Sdhaf1   | succinate dehydrogenase complex assembly factor 1                                                           | 1  | 1  | 0  |
| 34328286  | Sdhb     | succinate dehydrogenase complex, subunit B, iron sulfur (lp)                                                | 9  | 0  | 6  |
| 228008307 | Sdhc     | succinate dehydrogenase complex, subunit C, integral membrane protein                                       | 3  | 0  | 0  |
| 54607098  | Sdha     | succinate dehydrogenase Fp subunit                                                                          | 24 | 1  | 3  |
| 255958286 | Suclg1   | succinate-CoA ligase, GDP-forming alpha subunit                                                             | 9  | 0  | 2  |
| 165972309 | Suclg2   | succinate-CoA ligase, GDP-forming beta subunit                                                              | 19 | 1  | 3  |
| 46849708  | Sucla2   | succinate-Coenzyme A ligase, ADP-forming, beta subunit                                                      | 12 | 0  | 1  |
| 244790049 | Sqrdl    | sulfide quinone reductase-like                                                                              | 10 | 2  | 11 |
| 188219649 | Sult1d1  | sulfotransferase family 1D, member 1                                                                        | 11 | 0  | 14 |
| 254939663 | Senp3    | SUMO/sentrin specific peptidase 3                                                                           | 1  | 0  | 0  |
| 46560561  | Senp6    | SUMO/sentrin specific protease 6                                                                            | 0  | 1  | 1  |
| 9790247   | Sae1     | SUMO1 activating enzyme subunit 1                                                                           | 3  | 0  | 1  |
| 51593105  | Senp7    | SUMO1/sentrin specific protease 7 isoform 2                                                                 | 0  | 1  | 8  |
| 21312352  | Skiv2l2  | superkiller viralicidic activity 2-like 2                                                                   | 5  | 30 | 4  |
| 45597447  | Sod1     | superoxide dismutase 1, soluble                                                                             | 4  | 0  | 0  |
| 31980762  | Sod2     | superoxide dismutase 2, mitochondrial                                                                       | 9  | 3  | 0  |
| 23346601  | Svil     | supervillin isoform 1                                                                                       | 0  | 1  | 3  |
| 19526912  | St13     | suppression of tumorigenicity 13                                                                            | 8  | 0  | 0  |
| 6677983   | Clpb     | suppressor of K+ transport defect 3                                                                         | 1  | 0  | 0  |
| 154350222 | Supt16h  | suppressor of Ty 16 homolog                                                                                 | 5  | 39 | 16 |
| 6678181   | Supt4h1  | suppressor of Ty 4 homolog 1                                                                                | 0  | 1  | 0  |
| 22094123  | Supt5h   | suppressor of Ty 5 homolog                                                                                  | 1  | 26 | 2  |
| 166091434 | Supt6h   | suppressor of Ty 6 homolog                                                                                  | 0  | 26 | 9  |
| 31088872  | Supv3l1  | suppressor of var1, 3-like 1                                                                                | 1  | 0  | 1  |
| 6755702   | Suv39h1  | suppressor of variegation 3-9 homolog 1                                                                     | 0  | 0  | 1  |
| 268607629 | Suv420h1 | suppressor of variegation 4-20 homolog 1                                                                    | 0  | 0  | 1  |
| 253314523 | Suz12    | suppressor of zeste 12 homolog isoform 1                                                                    | 0  | 5  | 0  |
| 160707899 | Surf1    | surfeit 1                                                                                                   | 1  | 0  | 0  |
| 6755698   | Surf4    | surfeit gene 4                                                                                              | 1  | 0  | 0  |
| 6678185   | Surf6    | surfeit gene 6                                                                                              | 0  | 0  | 2  |
| 27369569  | Smndc1   | survival motor neuron domain containing 1                                                                   | 0  | 5  | 0  |
| 153791169 | Sned1    | sushi, nidogen and EGF-like domains 1                                                                       | 0  | 1  | 0  |
| 13385536  | Armc10   | SVH protein                                                                                                 | 9  | 0  | 8  |
| 229577278 | Smarcal1 | SWI/SNF related matrix associated, actin dependent regulator of chromatin, subfamily a-like 1               | 1  | 1  | 1  |
| 67763824  | Hlhf     | SWI/SNF related, matrix associated, actin dependent regulator of chromatin, subfamily a, member 3 isoform 2 | 0  | 0  | 1  |
| 40254124  | Smarca5  | SWI/SNF related, matrix associated, actin dependent regulator of chromatin, subfamily a, member 5           | 0  | 50 | 39 |
| 240255565 | Smarcb1  | SWI/SNF related, matrix associated, actin dependent regulator of chromatin, subfamily b, member 1 isoform 1 | 0  | 7  | 1  |
| 112421097 | Smarcc1  | SWI/SNF related, matrix associated, actin dependent regulator of chromatin, subfamily c, member 1           | 0  | 21 | 7  |
| 125347396 | Smarcd1  | SWI/SNF related, matrix associated, actin dependent regulator of chromatin, subfamily d, member 1           | 0  | 13 | 0  |
| 194328773 | Smarcd2  | SWI/SNF related, matrix associated, actin dependent regulator of chromatin, subfamily d, member 2 isoform 2 | 0  | 12 | 2  |

|           |          |                                                                                                   |     |    |     |
|-----------|----------|---------------------------------------------------------------------------------------------------|-----|----|-----|
| 10181166  | Smarce1  | SWI/SNF related, matrix associated, actin dependent regulator of chromatin, subfamily e, member 1 | 0   | 10 | 3   |
| 291463271 | Smarca4  | SWI/SNF-related matrix-associated actin-dependent regulator of chromatin a4                       | 1   | 38 | 20  |
| 166235125 | Smarcc2  | SWI/SNF-related matrix-associated actin-dependent regulator of chromatin c2 isoform 2             | 1   | 34 | 12  |
| 226437613 | Sympk    | symplekin                                                                                         | 0   | 16 | 4   |
| 295293127 | Dlg3     | synapse-associated protein 102                                                                    | 1   | 3  | 0   |
| 145699091 | Syne2    | synaptic nuclear envelope 2                                                                       | 214 | 68 | 229 |
| 7106429   | Syng2    | synaptogyrin 2                                                                                    | 1   | 0  | 1   |
| 13384642  | Synj2bp  | synaptojanin 2 binding protein                                                                    | 5   | 0  | 0   |
| 158303337 | Synpo    | synaptopodin isoform A                                                                            | 0   | 0  | 2   |
| 295317330 | Snap23   | synaptosomal-associated protein 23                                                                | 7   | 0  | 1   |
| 29788787  | Syncrip  | synaptotagmin binding, cytoplasmic RNA interacting protein isoform 1                              | 11  | 19 | 1   |
| 6755438   | Sdc1     | syndecan 1                                                                                        | 1   | 0  | 1   |
| 6755442   | Sdc4     | syndecan 4                                                                                        | 2   | 0  | 2   |
| 148277640 | Sdcbp    | syndecan binding protein isoform 2                                                                | 1   | 0  | 0   |
| 13385314  | Nudt16l1 | syndesmos                                                                                         | 0   | 12 | 3   |
| 16716495  | Ric8     | synembryn                                                                                         | 0   | 1  | 0   |
| 258547104 | Syvn1    | synovial apoptosis inhibitor 1, synoviolin                                                        | 3   | 0  | 0   |
| 19527102  | Stx12    | syntaxin 12                                                                                       | 5   | 0  | 0   |
| 156231059 | Stx16    | syntaxin 16 isoform d                                                                             | 2   | 0  | 2   |
| 70778911  | Stx3     | syntaxin 3 isoform A                                                                              | 0   | 0  | 1   |
| 6678177   | Stx4a    | syntaxin 4A (placental)                                                                           | 5   | 0  | 1   |
| 268370185 | Stx5a    | syntaxin 5                                                                                        | 2   | 0  | 0   |
| 31560462  | Stx7     | syntaxin 7                                                                                        | 5   | 0  | 0   |
| 9055356   | Stx8     | syntaxin 8                                                                                        | 1   | 0  | 0   |
| 165972307 | Stxbp1   | syntaxin binding protein 1 isoform b                                                              | 0   | 0  | 1   |
| 6755688   | Stxbp2   | syntaxin binding protein 2                                                                        | 12  | 0  | 0   |
| 6755690   | Stxbp3a  | syntaxin binding protein 3                                                                        | 2   | 2  | 0   |
| 6755692   | Stxbp4   | syntaxin binding protein 4                                                                        | 1   | 0  | 0   |
| 158749547 | Stxbp5   | syntaxin binding protein 5 (tomosyn)                                                              | 1   | 0  | 0   |
| 160333722 | Snta1    | syntrophin, acidic 1                                                                              | 0   | 0  | 2   |
| 124486596 | Taf1     | TAF1 RNA polymerase II, TATA box binding protein (TBP)-associated factor                          | 0   | 3  | 1   |
| 46518499  | Taf10    | TAF10 RNA polymerase II, TATA box binding protein (TBP)-associated factor                         | 0   | 1  | 0   |
| 30794436  | Taf11    | TAF11 RNA polymerase II, TATA box binding protein (TBP)-associated factor                         | 0   | 2  | 0   |
| 227330588 | Taf12    | TAF12 RNA polymerase II, TATA box binding protein (TBP)-associated factor                         | 0   | 3  | 0   |
| 30794412  | Taf15    | TAF15 RNA polymerase II, TATA box binding protein (TBP)-associated factor                         | 2   | 2  | 2   |
| 124487354 | Taf4a    | TAF4A RNA polymerase II, TATA box binding protein (TBP)-associated factor                         | 0   | 5  | 0   |
| 6678215   | Taf6     | TAF6 RNA polymerase II, TATA box binding protein (TBP)-associated factor                          | 0   | 15 | 0   |
| 295317365 | Taf6l    | TAF6-like RNA polymerase II, p300/CBP-associated factor (PCAF)-associated factor                  | 0   | 1  | 0   |
| 62821772  | Taf9     | TAF9 RNA polymerase II, TATA box binding protein-associated factor isoform 1                      | 0   | 3  | 0   |
| 227116327 | Tln1     | talin 1                                                                                           | 13  | 27 | 6   |
| 163310736 | Tln2     | talin 2                                                                                           | 0   | 3  | 0   |
| 124486923 | Tnks1bp1 | tankyrase 1 binding protein 1                                                                     | 1   | 2  | 0   |

|           |               |                                                                        |    |    |    |
|-----------|---------------|------------------------------------------------------------------------|----|----|----|
| 87239974  | Tnks          | tankyrase, TRF1-interacting ankyrin-related ADP-ribose polymerase      | 0  | 1  | 0  |
| 124358959 | Taok1         | TAO kinase 1                                                           | 0  | 0  | 1  |
| 314122205 | Taok3         | TAO kinase 3                                                           | 0  | 1  | 0  |
| 56682935  | Tardbp        | TAR DNA binding protein isoform 1                                      | 1  | 14 | 14 |
| 210147426 | Tom1          | target of myb1 homolog isoform 1                                       | 0  | 0  | 2  |
| 84875524  | Tom1l2        | target of myb1-like 2 isoform a                                        | 0  | 2  | 0  |
| 172073171 | Tbp           | TATA box binding protein                                               | 0  | 2  | 2  |
| 20270192  | Taf13         | TATA box-binding protein-associated factor, RNA polymerase II, K, 18kD | 0  | 2  | 0  |
| 21313140  | Tax1bp3       | Tax1 binding protein 3                                                 | 1  | 1  | 0  |
| 91598586  | Txlna         | taxilin alpha                                                          | 2  | 2  | 0  |
| 120587003 | Tbc1d1        | TBC1 domain family, member 1                                           | 1  | 0  | 1  |
| 29789165  | Tbc1d20       | TBC1 domain family, member 20                                          | 1  | 0  | 0  |
| 255522831 | Tbc1d24       | TBC1 domain family, member 24 isoform b                                | 0  | 0  | 1  |
| 163644270 | Tbc1d4        | TBC1 domain family, member 4                                           | 1  | 0  | 0  |
| 124486849 | Taf2          | TBP-associated factor 2                                                | 0  | 8  | 0  |
| 110665722 | Taf5          | Tbp-associated factor 5                                                | 1  | 11 | 0  |
| 189409138 | Cand1         | TBP-interacting protein                                                | 25 | 20 | 3  |
| 225543229 | Tiam1         | T-cell lymphoma invasion and metastasis 1 isoform 1                    | 0  | 1  | 1  |
| 268370151 | Tcirg1        | T-cell, immune regulator 1 isoform 2                                   | 0  | 0  | 3  |
| 110625624 | Tcp1          | t-complex protein 1                                                    | 27 | 11 | 2  |
| 7106433   | Tead2         | TEA domain family member 2                                             | 0  | 3  | 0  |
| 196049389 | Tead3         | TEA domain family member 3 isoform 2                                   | 0  | 2  | 0  |
| 164698396 | Tec           | tec protein tyrosine kinase isoform a                                  | 0  | 1  | 0  |
| 6678285   | Tep1          | telomerase associated protein 1                                        | 0  | 0  | 1  |
| 146231944 | Rif1          | telomere-associated protein RIF1                                       | 0  | 4  | 10 |
| 133904142 | Terf2         | telomeric repeat binding factor 2 isoform 1                            | 1  | 2  | 0  |
| 134152676 | Tns3          | tensin 3                                                               | 1  | 2  | 1  |
| 19526976  | Dnttip1       | terminal deoxynucleotidyltransferase interacting factor 1              | 0  | 5  | 0  |
| 46395466  | Tes           | testis derived transcript                                              | 1  | 0  | 1  |
| 329299050 | Dcun1d1       | testis derived transcript 3                                            | 0  | 3  | 0  |
| 124249335 | Tex10         | testis expressed gene 10                                               | 0  | 2  | 2  |
| 126090463 | Tex264        | testis expressed gene 264                                              | 1  | 0  | 0  |
| 6678445   | Tspyl1        | testis-specific protein, Y-encoded-like 1                              | 0  | 0  | 1  |
| 22122345  | Tspan14       | tetraspanin 14                                                         | 1  | 0  | 0  |
| 13385482  | Tspan31       | tetraspanin 31                                                         | 1  | 0  | 0  |
| 16716365  | Tspan4        | tetraspanin 4                                                          | 1  | 0  | 0  |
| 274316334 | Tspan8        | tetraspanin 8                                                          | 5  | 0  | 0  |
| 253735731 | Fis1          | tetratricopeptide repeat domain 11 isoform 1                           | 4  | 0  | 0  |
| 238637273 | Ttc15         | tetratricopeptide repeat domain 15 isoform 1                           | 1  | 0  | 0  |
| 295444831 | Ttc19         | tetratricopeptide repeat domain 19 isoform 1                           | 0  | 1  | 0  |
| 114158711 | Ttc21b        | tetratricopeptide repeat domain 21B                                    | 0  | 1  | 0  |
| 42734471  | Ttc26         | tetratricopeptide repeat domain 26                                     | 0  | 0  | 1  |
| 164519039 | Ttc27         | tetratricopeptide repeat domain 27                                     | 0  | 1  | 0  |
| 13385196  | Ttc35         | tetratricopeptide repeat domain 35                                     | 4  | 0  | 2  |
| 285026483 | Ttc4          | tetratricopeptide repeat domain 4                                      | 0  | 0  | 1  |
| 226494680 | Ttc7b         | tetratricopeptide repeat domain 7B                                     | 1  | 0  | 1  |
| 110625776 | Ttc9c         | tetratricopeptide repeat domain 9C                                     | 0  | 2  | 0  |
| 239915965 | Ift88         | Tg737 protein                                                          | 1  | 0  | 0  |
| 148540168 | 5730427N09Rik | TGF beta-inducible nuclear protein 1                                   | 0  | 0  | 2  |
| 91982765  | Th1l          | TH1 homolog                                                            | 0  | 1  | 0  |
| 7305589   | Tpk1          | thiamin pyrophosphokinase 1                                            | 1  | 0  | 0  |

|           |               |                                                               |    |    |    |
|-----------|---------------|---------------------------------------------------------------|----|----|----|
| 239916005 | Thop1         | thimet oligopeptidase 1                                       | 11 | 0  | 0  |
| 6755911   | Txn1          | thioredoxin 1                                                 | 6  | 4  | 1  |
| 9903609   | Txn2          | thioredoxin 2                                                 | 3  | 0  | 0  |
| 117606385 | Tmx3          | thioredoxin domain containing 10                              | 5  | 0  | 0  |
| 13384700  | Txndc12       | thioredoxin domain containing 12                              | 1  | 0  | 0  |
| 19072792  | Erp44         | thioredoxin domain containing 4                               | 7  | 0  | 0  |
| 83921612  | Txndc5        | thioredoxin domain containing 5                               | 3  | 1  | 1  |
| 158854007 | 1110049F12Rik | thioredoxin family Trp26                                      | 1  | 0  | 0  |
| 110224447 | Txnrd1        | thioredoxin reductase 1 isoform 2                             | 9  | 1  | 0  |
| 102468565 | Txnrd2        | thioredoxin reductase 2 precursor                             | 2  | 0  | 0  |
| 31543902  | Txn1          | thioredoxin-like 1                                            | 7  | 0  | 0  |
| 33859722  | Tmx1          | thioredoxin-related transmembrane protein 1                   | 2  | 0  | 0  |
| 21313210  | Txndc14       | thioredoxin-related transmembrane protein 2                   | 3  | 0  | 2  |
| 112817607 | Tmx4          | thioredoxin-related transmembrane protein 4                   | 1  | 0  | 4  |
| 23956332  | Thoc1         | THO complex 1                                                 | 0  | 20 | 0  |
| 254553424 | Thoc3         | THO complex 3                                                 | 0  | 7  | 0  |
| 6755763   | Thoc4         | THO complex 4                                                 | 3  | 11 | 7  |
| 27369587  | Thoc5         | THO complex 5                                                 | 1  | 21 | 0  |
| 125656163 | Thoc2         | THO complex subunit 2                                         | 0  | 35 | 0  |
| 27229277  | Tars          | threonyl-tRNA synthetase                                      | 2  | 17 | 0  |
| 254692873 | Tars2         | threonyl-tRNA synthetase 2, mitochondrial isoform 1           | 0  | 11 | 0  |
| 21704176  | Thumpd1       | THUMP domain containing 1                                     | 1  | 0  | 0  |
| 226958341 | Tk1           | thymidine kinase 1                                            | 0  | 0  | 1  |
| 166706901 | Tdg           | thymine DNA glycosylase isoform 2                             | 0  | 1  | 0  |
| 21362343  | Thyn1         | thymocyte protein Thy28                                       | 0  | 1  | 0  |
| 121949779 | Tmpo          | thymopoietin isoform zeta                                     | 7  | 46 | 35 |
| 68533246  | Thrap3        | thyroid hormone receptor associated protein 3                 | 5  | 3  | 7  |
| 334724453 | Trip10        | thyroid hormone receptor interactor 10                        | 6  | 10 | 0  |
| 226531227 | Trip11        | thyroid hormone receptor interactor 11 isoform 3              | 3  | 1  | 0  |
| 91932791  | Trip12        | thyroid hormone receptor interactor 12                        | 0  | 7  | 6  |
| 6678349   | Tial1         | Tial1 cytotoxic granule-associated RNA binding protein-like 1 | 0  | 3  | 0  |
| 124487251 | Tigd2         | tigger transposable element derived 2 homolog                 | 0  | 0  | 1  |
| 254675279 | Tjp1          | tight junction protein 1 isoform 1                            | 2  | 17 | 22 |
| 312222765 | Tjp2          | tight junction protein 2                                      | 16 | 9  | 9  |
| 114052811 | Tjp3          | tight junction protein 3                                      | 3  | 8  | 11 |
| 255760017 | Timeless      | timeless homolog isoform 2                                    | 0  | 1  | 1  |
| 21313608  | Tipin         | timeless interacting protein                                  | 1  | 0  | 0  |
| 13654268  | Tsta3         | tissue specific transplantation antigen P35B                  | 1  | 0  | 0  |
| 21539617  | Tlcd1         | TLC domain containing 1                                       | 1  | 0  | 0  |
| 13385998  | Trap1         | TNF receptor-associated protein 1                             | 26 | 0  | 2  |
| 75677522  | Tradd         | TNFRSF1A-associated via death domain                          | 0  | 0  | 1  |
| 153945749 | Top2a         | topoisomerase (DNA) II alpha                                  | 0  | 29 | 1  |
| 34328148  | Top2b         | topoisomerase (DNA) II beta                                   | 0  | 67 | 30 |
| 31559817  | Topbp1        | topoisomerase (DNA) II binding protein 1                      | 1  | 0  | 0  |
| 6755851   | Top3b         | topoisomerase (DNA) III beta                                  | 0  | 1  | 0  |
| 21450255  | Tor1a         | torsin A                                                      | 2  | 0  | 0  |
| 229608948 | Tor1aip1      | torsin A interacting protein 1 isoform 2                      | 1  | 1  | 6  |
| 237512947 | Tor1aip2      | torsin A interacting protein 2                                | 5  | 0  | 2  |
| 31559990  | Tor1b         | torsin family 1, member B                                     | 6  | 0  | 1  |
| 224809275 | Tor3a         | torsin family 3, member A                                     | 1  | 0  | 0  |
| 111154067 | Tmem165       | TPA regulated locus                                           | 3  | 0  | 0  |
| 57164407  | Tanc1         | TPR domain, ankyrin-repeat and coiled-coil-containing         | 1  | 0  | 1  |
| 117606383 | Trabd         | TraB domain containing                                        | 3  | 0  | 0  |

|           |          |                                                                                                 |    |    |   |
|-----------|----------|-------------------------------------------------------------------------------------------------|----|----|---|
| 66730565  | Trappc1  | trafficking protein particle complex 1                                                          | 1  | 0  | 0 |
| 7304929   | Trappc3  | trafficking protein particle complex 3                                                          | 2  | 1  | 0 |
| 157266281 | Trappc5  | trafficking protein particle complex 5                                                          | 0  | 1  | 0 |
| 40254203  | Trak2    | trafficking protein, kinesin binding 2                                                          | 1  | 0  | 0 |
| 119226255 | Sp1      | trans-acting transcription factor 1                                                             | 0  | 2  | 0 |
| 33859640  | Taldo1   | transaldolase 1                                                                                 | 16 | 0  | 0 |
| 229094714 | Tcea1    | transcription elongation factor A (SII) 1 isoform 2                                             | 1  | 14 | 0 |
| 21312712  | Tceb1    | transcription elongation factor B (SIII), polypeptide 1                                         | 2  | 0  | 0 |
| 13385800  | Tceb2    | transcription elongation factor B (SIII), polypeptide 2                                         | 3  | 2  | 0 |
| 31543847  | Tceb3    | transcription elongation factor B (SIII), polypeptide 3                                         | 1  | 0  | 1 |
| 87196334  | Tcerg1   | transcription elongation regulator 1                                                            | 0  | 40 | 0 |
| 166295206 | Tcf12    | transcription factor 12                                                                         | 0  | 1  | 0 |
| 166706889 | Tcf20    | transcription factor 20 isoform b                                                               | 0  | 0  | 1 |
| 218931198 | Tcf7l2   | transcription factor 7-like 2 isoform 1                                                         | 0  | 1  | 1 |
| 6678303   | Tfam     | transcription factor A, mitochondrial                                                           | 3  | 13 | 5 |
| 171846238 | Tcfap2a  | transcription factor AP-2, alpha isoform a                                                      | 0  | 4  | 1 |
| 13626034  | Tcfap4   | transcription factor AP4                                                                        | 0  | 1  | 0 |
| 22122569  | Tfb1m    | transcription factor B1, mitochondrial                                                          | 0  | 1  | 0 |
| 15628025  | Tcfcp2   | transcription factor CP2                                                                        | 0  | 2  | 0 |
| 46810275  | Grhl2    | transcription factor CP2-like 3                                                                 | 0  | 7  | 0 |
| 157384992 | Tcfe3    | transcription factor E3 isoform a                                                               | 0  | 1  | 0 |
| 22122529  | Cdca7l   | transcription factor RAM2                                                                       | 0  | 1  | 1 |
| 83921607  | Vps72    | transcription factor-like 1                                                                     | 0  | 2  | 0 |
| 70608137  | Brf1     | transcription initiation factor IIIB                                                            | 2  | 0  | 1 |
| 134053939 | Tcfcp2l1 | transcription repressor CRTR-1                                                                  | 0  | 4  | 0 |
| 21314854  | Gatad2b  | transcription repressor p66 component of the MeCP1 complex                                      | 0  | 5  | 3 |
| 254692909 | Ttf2     | transcription termination factor, RNA polymerase II                                             | 0  | 0  | 1 |
| 21313610  | Tada1l   | transcriptional adaptor 1-like                                                                  | 0  | 1  | 0 |
| 160333360 | Sin3a    | transcriptional regulator, SIN3A isoform 1                                                      | 0  | 17 | 2 |
| 33468969  | Tbl1x    | transducin (beta)-like 1 X-linked                                                               | 0  | 5  | 0 |
| 30102935  | Tbl3     | transducin (beta)-like 3                                                                        | 0  | 8  | 8 |
| 160333077 | Trp53bp1 | transformation related protein 53 binding protein 1                                             | 0  | 71 | 2 |
| 187960040 | Trp53    | transformation related protein 53 isoform a                                                     | 0  | 3  | 0 |
| 124486949 | Trrap    | transformation/transcription domain-associated protein                                          | 0  | 99 | 1 |
| 111160869 | Tra2a    | transformer-2 alpha                                                                             | 0  | 3  | 5 |
| 194394227 | Tbrg4    | transforming growth factor beta regulated gene 4                                                | 3  | 0  | 0 |
| 30519911  | Tagln2   | transgelin 2                                                                                    | 9  | 10 | 1 |
| 239787892 | Tgm1     | transglutaminase 1, K polypeptide                                                               | 0  | 0  | 1 |
| 6678329   | Tgm2     | transglutaminase 2, C polypeptide                                                               | 1  | 0  | 0 |
| 254540210 | Trpc4ap  | transient receptor potential cation channel, subfamily C, member 4 associated protein isoform 2 | 1  | 0  | 0 |
| 256773287 | Trpm7    | transient receptor potential cation channel, subfamily M, member 7                              | 0  | 0  | 2 |
| 269784723 | Trpv4    | transient receptor potential cation channel, subfamily V, member 4                              | 7  | 0  | 4 |
| 6678359   | Tkt      | transketolase                                                                                   | 27 | 1  | 5 |
| 6755899   | Tsn      | translin                                                                                        | 6  | 2  | 0 |
| 8394490   | Tsnax    | translin-associated factor X                                                                    | 2  | 0  | 0 |
| 158937240 | Timm10   | translocase of inner mitochondrial membrane 13 homolog a                                        | 1  | 0  | 0 |
| 33468937  | Timm17b  | translocase of inner mitochondrial membrane 17b                                                 | 1  | 0  | 2 |
| 254675168 | Timm23   | translocase of inner mitochondrial membrane 23 homolog                                          | 1  | 0  | 1 |
| 170763467 | Timm44   | translocase of inner mitochondrial membrane 44                                                  | 7  | 0  | 1 |

|           |          |                                                                   |    |   |    |
|-----------|----------|-------------------------------------------------------------------|----|---|----|
| 22094989  | Timm50   | translocase of inner mitochondrial membrane 50 homolog            | 8  | 0 | 3  |
| 7305577   | Timm8a1  | translocase of inner mitochondrial membrane 8 homolog a           | 1  | 4 | 0  |
| 7305579   | Timm8b   | translocase of inner mitochondrial membrane 8 homolog b           | 2  | 4 | 0  |
| 7305581   | Timm13   | translocase of inner mitochondrial membrane 9 homolog             | 3  | 5 | 2  |
| 13324686  | Tomm20   | translocase of outer mitochondrial membrane 20 homolog            | 1  | 0 | 4  |
| 31982091  | Tomm22   | translocase of outer mitochondrial membrane 22 homolog            | 1  | 0 | 6  |
| 13385500  | Tomm34   | translocase of outer mitochondrial membrane 34                    | 1  | 8 | 0  |
| 157909801 | Tomm40   | translocase of outer mitochondrial membrane 40                    | 5  | 0 | 10 |
| 27552760  | Tomm70a  | translocase of outer mitochondrial membrane 70 homolog A          | 11 | 9 | 12 |
| 71061477  | Dnajc19  | translocase of the inner mitochondrial membrane 14 isoform 1      | 2  | 1 | 0  |
| 30794386  | Tram1    | translocating chain-associating membrane protein 1                | 2  | 0 | 1  |
| 188528894 | Tm9sf2   | transmembrane 9 superfamily member 2                              | 4  | 0 | 2  |
| 31542095  | Tm9sf4   | transmembrane 9 superfamily protein member 4                      | 3  | 0 | 0  |
| 75677476  | Tmtc3    | transmembrane and tetratricopeptide repeat containing 3 isoform 1 | 1  | 0 | 0  |
| 58037339  | Tmtc4    | transmembrane and tetratricopeptide repeat containing 4           | 1  | 0 | 0  |
| 71143116  | Tapt1    | transmembrane anterior posterior transformation 1                 | 1  | 0 | 0  |
| 85362703  | Tmed1    | transmembrane emp24 domain containing 1                           | 3  | 0 | 0  |
| 281427153 | Tmed3    | transmembrane emp24 domain containing 3                           | 2  | 0 | 0  |
| 9790015   | Tmed2    | transmembrane emp24 domain trafficking protein 2                  | 5  | 0 | 2  |
| 21312062  | Tmed10   | transmembrane emp24 domain-containing protein 10                  | 8  | 2 | 6  |
| 19527236  | Tmed4    | transmembrane emp24 protein transport domain containing 4         | 6  | 0 | 2  |
| 21746165  | Tmed5    | transmembrane emp24 protein transport domain containing 5         | 5  | 1 | 2  |
| 145966911 | Tmed9    | transmembrane emp24 protein transport domain containing 9         | 4  | 0 | 3  |
| 34328226  | Tmprss2  | transmembrane protease, serine 2                                  | 1  | 0 | 0  |
| 262118243 | Tmem101  | transmembrane protein 101                                         | 1  | 0 | 0  |
| 188035856 | Tmem106b | transmembrane protein 106B                                        | 3  | 0 | 0  |
| 19527378  | Tmem109  | transmembrane protein 109                                         | 2  | 1 | 1  |
| 281182922 | Tmem11   | transmembrane protein 11                                          | 2  | 0 | 1  |
| 28827824  | Tmem111  | transmembrane protein 111                                         | 2  | 1 | 3  |
| 120952692 | Tmem147  | transmembrane protein 147                                         | 1  | 0 | 0  |
| 13384766  | Tmem14c  | transmembrane protein 14C                                         | 3  | 0 | 2  |
| 21704194  | Tmem161a | transmembrane protein 161A                                        | 1  | 0 | 0  |
| 313569833 | Tmem164  | transmembrane protein 164                                         | 1  | 0 | 0  |
| 68533251  | Tmem33   | transmembrane protein 33 isoform 2                                | 3  | 0 | 2  |
| 85662379  | Tmem41b  | transmembrane protein 41B                                         | 2  | 0 | 0  |
| 21311891  | Tmem43   | transmembrane protein 43                                          | 8  | 0 | 5  |
| 21450349  | Tmem45b  | transmembrane protein 45b                                         | 1  | 0 | 0  |
| 28077005  | Tmem48   | transmembrane protein 48                                          | 0  | 0 | 3  |
| 27753991  | Tmem49   | transmembrane protein 49                                          | 1  | 0 | 0  |
| 23346449  | Tmem5    | transmembrane protein 5                                           | 0  | 0 | 1  |
| 21313410  | Tmem50b  | transmembrane protein 50B                                         | 0  | 0 | 1  |
| 21703804  | Tmem51   | transmembrane protein 51                                          | 1  | 0 | 0  |
| 226342964 | Tmem63b  | transmembrane protein 63b                                         | 0  | 0 | 1  |

|           |          |                                                           |    |    |    |
|-----------|----------|-----------------------------------------------------------|----|----|----|
| 158631230 | Tmem66   | transmembrane protein 66                                  | 1  | 0  | 0  |
| 117647265 | Tmem70   | transmembrane protein 70 isoform 1                        | 1  | 0  | 0  |
| 13386014  | Tmem85   | transmembrane protein 85                                  | 1  | 1  | 1  |
| 160333204 | Tmem87a  | transmembrane protein 87A isoform 1                       | 1  | 0  | 0  |
| 19111162  | Tm9sf3   | transmembrane protein 9 superfamily member 3              | 7  | 0  | 1  |
| 281306757 | Tmem93   | transmembrane protein 93                                  | 2  | 0  | 0  |
| 115385968 | Tnpo1    | transportin 1 isoform 1                                   | 3  | 0  | 1  |
| 54312056  | Tnpo3    | transportin 3                                             | 1  | 2  | 1  |
| 6755742   | Tcof1    | treacle                                                   | 0  | 6  | 0  |
| 26892291  | Tinf2    | TRF1-interacting nuclear factor 2                         | 0  | 1  | 0  |
| 170172511 | Tnrc18   | trinucleotide repeat containing 18 isoform B              | 1  | 0  | 0  |
| 88501749  | Triobp   | TRIO and F-actin binding protein isoform 3                | 0  | 4  | 3  |
| 226958349 | Tpi1     | triosephosphate isomerase 1                               | 16 | 3  | 14 |
| 128485541 | Trim26   | tripartite motif protein 26 isoform a                     | 0  | 0  | 1  |
| 170295840 | Trim28   | tripartite motif protein 28                               | 10 | 23 | 8  |
| 119637830 | Trim33   | tripartite motif protein 33 isoform 1                     | 1  | 1  | 1  |
| 94420998  | Trim24   | tripartite motif-containing 24                            | 0  | 0  | 1  |
| 124358936 | Trim41   | tripartite motif-containing 41                            | 1  | 1  | 0  |
| 6678419   | Tpp2     | tripeptidyl peptidase II                                  | 1  | 1  | 0  |
| 6753448   | Tpp1     | tripeptidyl-peptidase I                                   | 7  | 2  | 0  |
| 145587082 | Trio     | triple functional domain (PTPRF interacting)              | 0  | 0  | 1  |
| 9790261   | Tfg      | Trk-fused                                                 | 6  | 0  | 0  |
| 261823938 | Trmt112  | TRM112-like                                               | 1  | 3  | 0  |
| 255958185 | Tsen34   | tRNA-intron endonuclease 4                                | 1  | 0  | 0  |
| 8394460   | Tmod3    | tropomodulin 3                                            | 4  | 6  | 13 |
| 256000792 | Tpm1     | tropomyosin 1, alpha                                      | 7  | 12 | 7  |
| 40254525  | Tpm3     | tropomyosin 3, gamma                                      | 8  | 7  | 5  |
| 47894398  | Tpm4     | tropomyosin 4                                             | 10 | 10 | 2  |
| 46409250  | Wrb      | tryptophan rich basic protein                             | 1  | 0  | 0  |
| 256818806 | Wars     | tryptophanyl-tRNA synthetase                              | 4  | 0  | 0  |
| 21313468  | Tsfm     | Ts translation elongation factor, mitochondrial           | 7  | 5  | 2  |
| 254911131 | Tufm     | Tu translation elongation factor, mitochondrial isoform 1 | 19 | 2  | 5  |
| 157057154 | Tulp4    | tubby like protein 4 isoform b                            | 2  | 0  | 0  |
| 6755905   | Tulp3    | tubby-like protein 3                                      | 1  | 0  | 0  |
| 79750409  | Tsc1     | tuberous sclerosis 1                                      | 0  | 1  | 0  |
| 269954711 | Ttl12    | tubulin tyrosine ligase-like family, member 12            | 3  | 0  | 0  |
| 6755901   | Tuba1a   | tubulin, alpha 1                                          | 1  | 0  | 0  |
| 34740335  | Tuba1b   | tubulin, alpha 1B                                         | 2  | 1  | 2  |
| 6678469   | Tuba1c   | tubulin, alpha 1C                                         | 24 | 6  | 18 |
| 6678467   | Tuba4a   | tubulin, alpha 4                                          | 3  | 0  | 1  |
| 21746161  | Tubb2b   | tubulin, beta                                             | 10 | 6  | 9  |
| 33859488  | Tubb2a   | tubulin, beta 2                                           | 1  | 0  | 1  |
| 22165384  | Tubb2c   | tubulin, beta 2C                                          | 1  | 0  | 1  |
| 7106439   | Tubb5    | tubulin, beta 5                                           | 5  | 3  | 7  |
| 27754056  | Tubb6    | tubulin, beta 6                                           | 14 | 3  | 9  |
| 228008297 | Tubgcp2  | tubulin, gamma complex associated protein 2               | 1  | 0  | 0  |
| 39930567  | Tubgcp3  | tubulin, gamma complex associated protein 3               | 0  | 0  | 1  |
| 10190660  | Tfip11   | tuftelin interacting protein 11                           | 0  | 0  | 5  |
| 30519885  | Tnfrsf21 | tumor necrosis factor receptor superfamily, member 21     | 0  | 1  | 0  |
| 70608214  | Tpd52    | tumor protein D52 isoform 4                               | 5  | 0  | 0  |
| 6678409   | Tpd52l1  | tumor protein D52-like 1                                  | 1  | 0  | 0  |
| 31560247  | Tpd52l2  | tumor protein D52-like 2                                  | 5  | 0  | 0  |
| 112799851 | Trp53bp2 | tumor protein p53 binding protein, 2                      | 0  | 1  | 0  |
| 6678437   | Tpt1     | tumor protein, translationally-controlled 1               | 5  | 3  | 1  |

|           |               |                                                                                             |    |    |    |
|-----------|---------------|---------------------------------------------------------------------------------------------|----|----|----|
| 6755863   | Hsp90b1       | tumor rejection antigen gp96                                                                | 43 | 1  | 10 |
| 9789955   | Tusc2         | tumor suppressor candidate 2                                                                | 0  | 1  | 0  |
| 124248487 | Tusc3         | tumor suppressor candidate 3                                                                | 1  | 0  | 1  |
| 254588052 | Ttyh3         | tweety 3                                                                                    | 1  | 0  | 0  |
| 62990169  | Twf1          | twinfilin 1                                                                                 | 1  | 9  | 0  |
| 6755224   | Twf2          | twinfilin-like protein                                                                      | 0  | 2  | 0  |
| 27545207  | Twistnb       | TWIST neighbor                                                                              | 0  | 6  | 0  |
| 157057192 | Lin9          | type I interferon receptor beta chain-associated isoform 2                                  | 1  | 0  | 0  |
| 31543974  | Ywhab         | tyrosine 3-monooxygenase/tryptophan 5-monooxygenase activation protein, beta polypeptide    | 8  | 7  | 6  |
| 226874906 | Ywhae         | tyrosine 3-monooxygenase/tryptophan 5-monooxygenase activation protein, epsilon polypeptide | 15 | 3  | 6  |
| 6756037   | Ywhah         | tyrosine 3-monooxygenase/tryptophan 5-monooxygenase activation protein, eta polypeptide     | 9  | 5  | 5  |
| 6756039   | Ywhaq         | tyrosine 3-monooxygenase/tryptophan 5-monooxygenase activation protein, theta polypeptide   | 8  | 4  | 7  |
| 6756041   | Ywhaz         | tyrosine 3-monooxygenase/tryptophan 5-monooxygenase activation protein, zeta polypeptide    | 2  | 6  | 9  |
| 165377181 | Yars          | tyrosyl-tRNA synthetase                                                                     | 2  | 3  | 0  |
| 6755596   | Snrpc         | U1 small nuclear ribonucleoprotein 1C                                                       | 0  | 2  | 2  |
| 67846113  | Snrnp70       | U1 small nuclear ribonucleoprotein 70 kDa                                                   | 6  | 14 | 3  |
| 71067104  | Snrnp48       | U11/U12 snRNP 48K                                                                           | 1  | 0  | 0  |
| 254939700 | U2af1         | U2 small nuclear ribonucleoprotein auxiliary factor (U2AF) 1 isoform 1                      | 1  | 6  | 4  |
| 327365322 | U2af2         | U2 small nuclear ribonucleoprotein auxiliary factor (U2AF) 2                                | 6  | 14 | 6  |
| 23956110  | Snrpb2        | U2 small nuclear ribonucleoprotein B                                                        | 2  | 3  | 4  |
| 228480232 | Snrpa1        | U2 small nuclear ribonucleoprotein polypeptide A                                            | 6  | 8  | 9  |
| 25072205  | U2af1l4       | U2 small nuclear RNA auxiliary factor 1-like 4                                              | 0  | 4  | 0  |
| 171460910 | 2610101N10Rik | U2-associated SR140 protein 2                                                               | 0  | 10 | 12 |
| 190684705 | Imp4          | U3 snoRNP protein 4 homolog                                                                 | 0  | 0  | 2  |
| 21539655  | Prpf6         | U5 snRNP-associated 102 kDa protein                                                         | 3  | 23 | 4  |
| 115298670 | Snrnp40       | U5 snRNP-specific protein (Prp8-binding)                                                    | 0  | 14 | 12 |
| 40018610  | Snrnp200      | U5 snRNP-specific protein, 200 kDa                                                          | 11 | 86 | 74 |
| 19527156  | Lsm8          | U6 snRNA-associated Sm-like protein LSM8                                                    | 3  | 4  | 3  |
| 253795523 | Lsm10         | U7 snRNP-specific Sm-like protein LSM10                                                     | 0  | 1  | 0  |
| 50054188  | Mum1          | UBE-1C2 protein                                                                             | 0  | 1  | 1  |
| 21311819  | Ubiad1        | UbiA prenyltransferase domain containing 1                                                  | 0  | 0  | 1  |
| 158749567 | Ubn2          | ubiquitin 2                                                                                 | 1  | 0  | 0  |
| 22726191  | Ubqln1        | ubiquilin 1 isoform 2                                                                       | 2  | 0  | 0  |
| 34328236  | Ubqln2        | ubiquilin 2                                                                                 | 7  | 0  | 0  |
| 15805016  | Ubqln4        | ubiquilin 4                                                                                 | 0  | 1  | 1  |
| 22267442  | Uqcrc2        | ubiquinol cytochrome c reductase core protein 2                                             | 13 | 2  | 14 |
| 13385726  | Uqcrb         | ubiquinol-cytochrome c reductase binding protein                                            | 2  | 3  | 5  |
| 37574048  | 1110020P15Rik | ubiquinol-cytochrome c reductase complex protein                                            | 2  | 2  | 2  |
| 46593021  | Uqcrc1        | ubiquinol-cytochrome c reductase core protein 1                                             | 14 | 1  | 13 |
| 21539599  | Uqcrh         | ubiquinol-cytochrome c reductase hinge protein                                              | 3  | 1  | 2  |
| 13385112  | Uqcr          | ubiquinol-cytochrome c reductase subunit                                                    | 1  | 0  | 0  |
| 21539585  | Uqcrq         | ubiquinol-cytochrome c reductase, complex III subunit VII                                   | 1  | 1  | 1  |
| 13385168  | Uqcrcs1       | ubiquinol-cytochrome c reductase, Rieske iron-sulfur polypeptide 1                          | 8  | 4  | 8  |
| 157671923 | Ubc           | ubiquitin C                                                                                 | 0  | 0  | 1  |
| 139948802 | Uchl3         | ubiquitin carboxyl-terminal esterase L3                                                     | 2  | 0  | 0  |



|           |        |                                                                 |    |    |   |
|-----------|--------|-----------------------------------------------------------------|----|----|---|
| 15809026  | Uchl4  | ubiquitin carboxyl-terminal esterase L4                         | 6  | 0  | 0 |
| 229577283 | Uchl5  | ubiquitin carboxyl-terminal hydrolase L5 isoform 1              | 0  | 3  | 0 |
| 21703984  | Ubd1   | ubiquitin domain containing 1                                   | 0  | 0  | 1 |
| 257153392 | Ufd1l  | ubiquitin fusion degradation 1 like                             | 0  | 1  | 0 |
| 32189428  | Mib1   | ubiquitin ligase mind bomb                                      | 0  | 1  | 0 |
| 293651567 | Ubr2   | ubiquitin protein ligase E3 component n-recognin 2              | 0  | 1  | 1 |
| 76880500  | Ube3a  | ubiquitin protein ligase E3A isoform 2                          | 1  | 0  | 0 |
| 6678493   | Usp10  | ubiquitin specific peptidase 10                                 | 1  | 0  | 0 |
| 251823802 | Usp16  | ubiquitin specific peptidase 16                                 | 0  | 1  | 1 |
| 226442882 | Usp36  | ubiquitin specific peptidase 36                                 | 0  | 0  | 1 |
| 34328301  | Usp38  | ubiquitin specific peptidase 38                                 | 1  | 0  | 0 |
| 20070404  | Usp39  | ubiquitin specific peptidase 39                                 | 5  | 18 | 1 |
| 116686116 | Usp42  | ubiquitin specific peptidase 42                                 | 1  | 0  | 1 |
| 29243896  | Usp46  | ubiquitin specific peptidase 46                                 | 0  | 1  | 0 |
| 7305619   | Usp5   | ubiquitin specific peptidase 5                                  | 4  | 0  | 0 |
| 154146209 | Usp7   | ubiquitin specific peptidase 7                                  | 5  | 17 | 1 |
| 169646342 | Usp1   | ubiquitin specific peptidase like 1 isoform A                   | 1  | 0  | 0 |
| 84452155  | Usp14  | ubiquitin specific protease 14 isoform 1                        | 3  | 0  | 0 |
| 126032299 | Usp32  | ubiquitin specific protease 32                                  | 1  | 0  | 0 |
| 114053325 | Usp48  | ubiquitin specific protease 48                                  | 0  | 2  | 0 |
| 115511018 | Usp9x  | ubiquitin specific protease 9, X chromosome                     | 5  | 0  | 1 |
| 270265851 | Usp19  | ubiquitin thioesterase 19                                       | 0  | 2  | 0 |
| 310688895 | Usp40  | ubiquitin thioesterase 40                                       | 0  | 0  | 1 |
| 110625685 | Usp22  | ubiquitin thioesterase 22                                       | 0  | 1  | 0 |
| 21450103  | Usp3   | ubiquitin thioesterase 3                                        | 0  | 3  | 0 |
| 42741690  | Ube2v1 | ubiquitin-conjugating enzyme E2 variant 1                       | 1  | 0  | 1 |
| 31980960  | Ube2j1 | ubiquitin-conjugating enzyme E2, J1                             | 0  | 1  | 1 |
| 85662419  | Ube2j2 | ubiquitin-conjugating enzyme E2, J2 homolog isoform a           | 0  | 0  | 1 |
| 9790041   | Ube2a  | ubiquitin-conjugating enzyme E2A, RAD6 homolog                  | 0  | 1  | 0 |
| 21312888  | Ube2c  | ubiquitin-conjugating enzyme E2C                                | 1  | 0  | 0 |
| 6678479   | Ube2e1 | ubiquitin-conjugating enzyme E2E 1, UBC4/5 homolog              | 1  | 0  | 0 |
| 281332144 | Ube2h  | ubiquitin-conjugating enzyme E2H                                | 1  | 0  | 0 |
| 294862307 | Ube2i  | ubiquitin-conjugating enzyme E2I                                | 2  | 5  | 1 |
| 6678481   | Ube2l3 | ubiquitin-conjugating enzyme E2L 3                              | 4  | 0  | 0 |
| 270309117 | Ube2m  | ubiquitin-conjugating enzyme E2M                                | 2  | 0  | 0 |
| 18017605  | Ube2n  | ubiquitin-conjugating enzyme E2N                                | 3  | 2  | 3 |
| 257796272 | Ube2q2 | ubiquitin-conjugating enzyme E2Q 2                              | 1  | 0  | 0 |
| 13385778  | Ube2r2 | ubiquitin-conjugating enzyme E2R 2                              | 1  | 0  | 0 |
| 31543918  | Ube2v2 | ubiquitin-conjugating enzyme E2v2 isoform 1                     | 4  | 0  | 2 |
| 110625675 | Ube2w  | ubiquitin-conjugating enzyme E2W (putative)                     | 0  | 1  | 0 |
| 13385932  | Ufm1   | ubiquitin-fold modifier 1                                       | 2  | 0  | 0 |
| 6755925   | Ubl3   | ubiquitin-like 3                                                | 1  | 0  | 0 |
| 21703810  | Ubl4   | ubiquitin-like 4                                                | 0  | 2  | 0 |
| 13384784  | Ubl5   | ubiquitin-like 5                                                | 0  | 0  | 1 |
| 237681133 | Fau    | ubiquitin-like protein fubi and ribosomal protein S30 precursor | 1  | 4  | 0 |
| 162287241 | Uhrf1  | ubiquitin-like with PHD and ring finger domains 1 isoform B     | 0  | 7  | 2 |
| 224809307 | Usp21  | ubiquitin-specific protease 21                                  | 0  | 1  | 2 |
| 124486616 | Zc3h7b | ubiquitous tetratricopeptide containing protein RoXaN           | 0  | 1  | 0 |
| 227496327 | B3gnt7 | UDP-GlcNAc:betaGal beta-1,3-N-acetylglucosaminyltransferase 7   | 1  | 0  | 0 |
| 236466498 | Uggt1  | UDP-glucose ceramide glucosyltransferase-like 1                 | 32 | 0  | 0 |
| 6678499   | Ugdh   | UDP-glucose dehydrogenase                                       | 3  | 0  | 0 |

|           |               |                                                                                    |    |    |    |
|-----------|---------------|------------------------------------------------------------------------------------|----|----|----|
| 21314832  | Ugp2          | UDP-glucose pyrophosphorylase 2                                                    | 3  | 0  | 0  |
| 46877109  | Galnt2        | UDP-N-acetyl-alpha-D-galactosamine:polypeptide N-acetylgalactosaminyltransferase 2 | 3  | 0  | 0  |
| 162951828 | Galnt3        | UDP-N-acetyl-alpha-D-galactosamine:polypeptide N-acetylgalactosaminyltransferase 3 | 13 | 3  | 4  |
| 7657112   | Galnt4        | UDP-N-acetyl-alpha-D-galactosamine:polypeptide N-acetylgalactosaminyltransferase 4 | 1  | 0  | 0  |
| 30520375  | Uap1          | UDP-N-acetylglucosamine pyrophosphorylase 1                                        | 1  | 0  | 0  |
| 31982409  | Dpagt1        | UDP-N-acetylglucosamine-dolichyl-phosphate N-acetylglucosaminephosphotransferase   | 1  | 0  | 0  |
| 84794548  | Uap111        | UDP-N-acetylglucosamine pyrophosphorylase 1-like 1                                 | 9  | 0  | 0  |
| 62243588  | Unc13d        | unc-13 homolog D                                                                   | 1  | 1  | 2  |
| 227908790 | Unc45a        | unc-45 homolog A                                                                   | 2  | 1  | 0  |
| 29789243  | Unc84a        | unc-84 homolog A                                                                   | 0  | 0  | 15 |
| 329299037 | Unc84b        | unc-84 homolog B                                                                   | 0  | 0  | 23 |
| 77404294  | Usmg5         | upregulated during skeletal muscle growth 5                                        | 4  | 0  | 0  |
| 117938770 | 2010005J08Rik | up-regulated gene 4 isoform 2                                                      | 0  | 1  | 0  |
| 134032032 | Ubp1          | upstream binding protein 1 isoform b                                               | 0  | 1  | 0  |
| 113205057 | Ubtf          | upstream binding transcription factor, RNA polymerase I isoform 1                  | 2  | 16 | 5  |
| 33859498  | Umps          | uridine monophosphate synthase                                                     | 2  | 0  | 0  |
| 13507680  | Uck2          | uridine-cytidine kinase 2                                                          | 1  | 0  | 0  |
| 58037127  | Upk1a         | uroplakin 1A                                                                       | 5  | 0  | 0  |
| 110347606 | Urod          | uroporphyrinogen decarboxylase                                                     | 1  | 0  | 0  |
| 13385534  | Utp11l        | UTP11-like, U3 small nucleolar ribonucleoprotein                                   | 0  | 0  | 5  |
| 51889716  | Utp14a        | UTP14, U3 small nucleolar ribonucleoprotein, homolog A                             | 0  | 0  | 2  |
| 30725776  | Utp15         | UTP15, U3 small nucleolar ribonucleoprotein, homolog                               | 0  | 1  | 6  |
| 61656180  | Utp18         | UTP18, small subunit processome component                                          | 0  | 0  | 10 |
| 21450209  | Utp6          | UTP6, small subunit (SSU) processome component, homolog                            | 0  | 2  | 3  |
| 110431378 | Utrn          | utrophin                                                                           | 12 | 4  | 5  |
| 31542488  | Vac14         | Vac14 homolog                                                                      | 1  | 0  | 1  |
| 71067122  | Vrk1          | vaccinia related kinase 1 isoform a                                                | 0  | 17 | 0  |
| 19527166  | Vrk3          | vaccinia related kinase 3                                                          | 0  | 11 | 2  |
| 45504359  | Atp6v1e1      | vacuolar H+ ATPase E1                                                              | 3  | 0  | 2  |
| 15617197  | Atp6v1g1      | vacuolar H+ ATPase G1                                                              | 1  | 0  | 2  |
| 19705578  | Atp6v1b2      | vacuolar H+ATPase B2                                                               | 15 | 0  | 7  |
| 66392160  | Vps13a        | vacuolar protein sorting 13A                                                       | 2  | 0  | 0  |
| 254939640 | Vps16         | vacuolar protein sorting 16                                                        | 0  | 0  | 1  |
| 25092662  | Vps25         | vacuolar protein sorting 25                                                        | 0  | 5  | 0  |
| 29825827  | Vps26b        | vacuolar protein sorting 26 homolog B                                              | 2  | 0  | 0  |
| 164518904 | Vps26a        | vacuolar protein sorting 26 isoform a                                              | 4  | 0  | 0  |
| 13385320  | Vps28         | vacuolar protein sorting 28                                                        | 1  | 0  | 0  |
| 9790285   | Vps29         | vacuolar protein sorting 29                                                        | 3  | 0  | 0  |
| 13928670  | Vps35         | vacuolar protein sorting 35                                                        | 20 | 0  | 1  |
| 7305631   | Vps45         | vacuolar protein sorting 45                                                        | 6  | 0  | 1  |
| 18699726  | Vps4a         | vacuolar protein sorting 4a                                                        | 1  | 0  | 1  |
| 164698506 | Vps4b         | vacuolar protein sorting 4b                                                        | 0  | 1  | 1  |
| 148747162 | Vps52         | vacuolar protein sorting 52                                                        | 1  | 0  | 0  |
| 225543319 | Vcp           | valosin containing protein                                                         | 32 | 1  | 2  |
| 255069795 | Vars          | valyl-tRNA synthetase                                                              | 22 | 21 | 6  |
| 117414176 | Vezf1         | vascular endothelial zinc finger 1                                                 | 0  | 1  | 0  |
| 160707909 | Vasp          | vasodilator-stimulated phosphoprotein                                              | 2  | 3  | 1  |
| 210031395 | Vash1         | vasohibin 1                                                                        | 0  | 0  | 1  |
| 31981693  | Vasn          | vasorin                                                                            | 1  | 0  | 0  |

|           |         |                                                                                                        |    |    |    |
|-----------|---------|--------------------------------------------------------------------------------------------------------|----|----|----|
| 31559995  | Crk     | v-crk sarcoma virus CT10 oncogene homolog                                                              | 2  | 0  | 0  |
| 31542421  | Crkl    | v-crk sarcoma virus CT10 oncogene homolog (avian)-like                                                 | 3  | 0  | 0  |
| 54873610  | ErbB2   | v-erb-b2 erythroblastic leukemia viral oncogene homolog 2, neuro/glioblastoma derived oncogene homolog | 2  | 0  | 0  |
| 238637305 | Vldlr   | very low density lipoprotein receptor isoform a                                                        | 2  | 0  | 0  |
| 100817933 | Acad9   | very-long-chain acyl-CoA dehydrogenase VLCAD homolog                                                   | 22 | 0  | 2  |
| 33859662  | Vat1    | vesicle amine transport protein 1 homolog (T californica)                                              | 11 | 0  | 0  |
| 31980617  | Vti1b   | vesicle transport through interaction with t-SNAREs 1B homolog                                         | 4  | 0  | 0  |
| 13928668  | Vti1a   | vesicle transport through interaction with t-SNAREs homolog 1A                                         | 2  | 0  | 0  |
| 6678551   | Vamp2   | vesicle-associated membrane protein 2                                                                  | 2  | 0  | 0  |
| 31543938  | Vamp4   | vesicle-associated membrane protein 4                                                                  | 1  | 0  | 0  |
| 31980629  | Vamp8   | vesicle-associated membrane protein 8                                                                  | 4  | 0  | 1  |
| 94721328  | Vapa    | vesicle-associated membrane protein, associated protein A                                              | 9  | 2  | 4  |
| 31543940  | Vapb    | vesicle-associated membrane protein, associated protein B and C                                        | 7  | 1  | 5  |
| 31543349  | Nsf     | vesicle-fusing ATPase                                                                                  | 9  | 0  | 0  |
| 257096033 | Vill    | villin-like                                                                                            | 0  | 1  | 1  |
| 31543942  | Vcl     | vinculin                                                                                               | 32 | 33 | 16 |
| 326806988 | Yes1    | viral oncogene yes homolog                                                                             | 0  | 0  | 2  |
| 13385626  | Med4    | vitamin D receptor interacting protein                                                                 | 0  | 2  | 0  |
| 6754608   | Maff    | v-maf musculoaponeurotic fibrosarcoma oncogene family, protein F                                       | 0  | 2  | 0  |
| 6754610   | Mafg    | v-maf musculoaponeurotic fibrosarcoma oncogene family, protein G                                       | 0  | 1  | 0  |
| 6754612   | Mafk    | v-maf musculoaponeurotic fibrosarcoma oncogene family, protein K                                       | 0  | 1  | 1  |
| 6755963   | Vdac1   | voltage-dependent anion channel 1                                                                      | 18 | 3  | 21 |
| 6755965   | Vdac2   | voltage-dependent anion channel 2                                                                      | 15 | 5  | 17 |
| 6755967   | Vdac3   | voltage-dependent anion channel 3                                                                      | 11 | 0  | 14 |
| 124248572 | Vbp1    | von Hippel-Lindau binding protein 1                                                                    | 1  | 0  | 0  |
| 82617569  | Vprbp   | Vpr-binding protein                                                                                    | 0  | 0  | 1  |
| 46849724  | Ankrd27 | VPS9-ankyrin repeat-containing protein isoform 2                                                       | 0  | 1  | 0  |
| 227496776 | Araf    | v-raf murine sarcoma 3611 viral oncogene homolog isoform 1                                             | 0  | 1  | 1  |
| 11612509  | Ralb    | v-ral simian leukemia viral oncogene homolog B (ras related)                                           | 2  | 4  | 4  |
| 6677709   | Rela    | v-rel reticuloendotheliosis viral oncogene homolog A                                                   | 1  | 0  | 0  |
| 21312840  | Wfdc2   | WAP four-disulfide core domain 2                                                                       | 0  | 1  | 0  |
| 23510313  | Wasf2   | WAS protein family, member 2                                                                           | 0  | 5  | 0  |
| 21312280  | Wdfy1   | WD repeat and FYVE domain containing 1 isoform 1                                                       | 1  | 1  | 0  |
| 39930599  | Wdfy3   | WD repeat and FYVE domain containing 3                                                                 | 0  | 1  | 1  |
| 40254224  | Wdhd1   | WD repeat and HMG-box DNA binding protein 1                                                            | 0  | 0  | 1  |
| 6755995   | Wdr1    | WD repeat domain 1                                                                                     | 15 | 13 | 0  |
| 312261274 | Wdr12   | WD repeat domain 12                                                                                    | 0  | 0  | 3  |
| 83649741  | Wdr18   | WD repeat domain 18                                                                                    | 0  | 4  | 1  |
| 30425338  | Wdr3    | WD repeat domain 3                                                                                     | 0  | 9  | 11 |
| 21362285  | Wdr33   | WD repeat domain 33                                                                                    | 0  | 7  | 3  |
| 31542010  | Wdr36   | WD repeat domain 36 isoform 2                                                                          | 0  | 10 | 17 |
| 241896997 | Wdr43   | WD repeat domain 43 isoform 9                                                                          | 0  | 3  | 11 |
| 10181122  | Wdr46   | WD repeat domain 46                                                                                    | 0  | 0  | 3  |

|           |               |                                                                        |   |    |    |
|-----------|---------------|------------------------------------------------------------------------|---|----|----|
| 33468987  | Wdr48         | WD repeat domain 48                                                    | 0 | 1  | 0  |
| 18252790  | Wdr5          | WD repeat domain 5                                                     | 0 | 12 | 1  |
| 56605680  | Thoc6         | WD repeat domain 58                                                    | 0 | 13 | 0  |
| 13878227  | Wdr6          | WD repeat domain 6                                                     | 0 | 1  | 0  |
| 70778817  | Wdr61         | WD repeat domain 61 isoform a                                          | 3 | 7  | 0  |
| 264681545 | Wdr67         | WD repeat domain 67                                                    | 1 | 0  | 0  |
| 124487149 | Wdr70         | WD repeat domain 70                                                    | 0 | 2  | 0  |
| 83523742  | Wdr75         | WD repeat domain 75                                                    | 0 | 0  | 8  |
| 124487321 | Wdr76         | WD repeat domain 76                                                    | 0 | 4  | 0  |
| 148223079 | Wdr82         | WD repeat domain containing 82                                         | 0 | 10 | 1  |
| 168480115 | Dcaf13        | WD repeats and SOF domain containing 1                                 | 0 | 0  | 3  |
| 27229002  | Wdr45l        | Wdr45 like                                                             | 1 | 0  | 0  |
| 294979205 | Wiz           | widely-interspaced zinc finger motifs isoform 2                        | 0 | 2  | 7  |
| 15809010  | Wbscr16       | Williams-Beuren syndrome chromosome region 16 homolog                  | 0 | 1  | 0  |
| 125988405 | Wbscr22       | Williams-Beuren syndrome critical region protein 22                    | 1 | 0  | 0  |
| 165377291 | Wtap          | Wilms&apos; tumour 1-associating protein isoform a                     | 0 | 4  | 0  |
| 100815493 | Wapal         | wings apart-like homolog                                               | 0 | 6  | 0  |
| 37537556  | Wipf2         | Wire protein                                                           | 0 | 1  | 0  |
| 268370042 | Wasl          | Wiskott-Aldrich syndrome-like                                          | 3 | 0  | 0  |
| 312283631 | Wnk1          | WNK lysine deficient protein kinase 1                                  | 1 | 0  | 0  |
| 295424169 | Whsc1         | Wolf-Hirschhorn syndrome candidate 1                                   | 0 | 1  | 0  |
| 124486903 | Whsc1l1       | Wolf-Hirschhorn syndrome candidate 1-like 1 isoform 2                  | 1 | 1  | 1  |
| 33859652  | Whsc2         | Wolf-Hirschhorn syndrome candidate 2 homolog                           | 0 | 1  | 0  |
| 6755997   | Wfs1          | Wolfram syndrome 1 protein homolog                                     | 5 | 0  | 1  |
| 46402183  | Wtip          | WT1-interacting protein                                                | 0 | 1  | 0  |
| 267844920 | Wbp11         | WW domain binding protein 11                                           | 0 | 9  | 1  |
| 8394539   | Wbp2          | WW domain binding protein 2                                            | 2 | 0  | 0  |
| 115495457 | Wbp7          | WW domain binding protein 7                                            | 0 | 0  | 1  |
| 226371675 | Wac           | WW domain containing adaptor with coiled-coil isoform 1                | 0 | 1  | 0  |
| 121247429 | Xpc           | xeroderma pigmentosum, complementation group C                         | 0 | 3  | 0  |
| 13385660  | Xab2          | XPA binding protein 2                                                  | 0 | 3  | 19 |
| 76563952  | Rexo4         | XPMC2 prevents mitotic catastrophe 2 homolog                           | 0 | 1  | 0  |
| 42476274  | Xpnpep1       | X-prolyl aminopeptidase (aminopeptidase P) 1, soluble                  | 6 | 0  | 0  |
| 28893421  | Xpnpep3       | X-prolyl aminopeptidase (aminopeptidase P) 3, putative                 | 1 | 2  | 1  |
| 170295844 | Xrcc1         | X-ray repair complementing defective repair in Chinese hamster cells 1 | 2 | 1  | 1  |
| 160333605 | Xrcc5         | X-ray repair complementing defective repair in Chinese hamster cells 5 | 3 | 7  | 0  |
| 145587104 | Xrcc6         | X-ray repair complementing defective repair in Chinese hamster cells 6 | 4 | 3  | 0  |
| 114205437 | 4933407N01Rik | XTP3-transactivated protein B                                          | 1 | 0  | 0  |
| 225543566 | Yeats2        | YEATS domain containing 2 isoform 1                                    | 1 | 3  | 0  |
| 13386064  | Yeats4        | YEATS domain containing 4                                              | 0 | 3  | 0  |
| 283945493 | Yap1          | yes-associated protein 1                                               | 1 | 0  | 0  |
| 28076889  | Yipf4         | Yip1 domain family, member 4                                           | 1 | 0  | 0  |
| 25282409  | Yif1a         | Yip1p-interacting factor                                               | 2 | 0  | 1  |
| 31543971  | Ykt6          | YKT6 v-SNARE protein                                                   | 0 | 0  | 3  |
| 146134507 | Ylpm1         | YLP motif containing 1                                                 | 0 | 1  | 3  |
| 7305635   | Yme11         | YME1-like 1                                                            | 5 | 0  | 0  |
| 225543495 | Ythdf3        | YTH domain family 3 isoform 1                                          | 1 | 1  | 0  |
| 40254385  | Yaf2          | YY1 associated factor 2                                                | 0 | 1  | 1  |
| 31982421  | Yy1           | YY1 transcription factor                                               | 0 | 8  | 0  |

|           |          |                                                         |   |    |   |
|-----------|----------|---------------------------------------------------------|---|----|---|
| 31559926  | Zadh2    | zinc binding alcohol dehydrogenase, domain containing 2 | 4 | 0  | 0 |
| 30520189  | Zbtb1    | zinc finger and BTB domain containing 1                 | 0 | 0  | 1 |
| 226423893 | Zbtb2    | zinc finger and BTB domain containing 2                 | 0 | 1  | 0 |
| 257196201 | Zbtb20   | zinc finger and BTB domain containing 20                | 0 | 1  | 3 |
| 109627663 | Zhx1     | zinc finger and homeodomain protein 1                   | 0 | 6  | 0 |
| 115270986 | Zc3h11a  | zinc finger CCCH type containing 11A                    | 1 | 8  | 2 |
| 156717216 | Zc3h6    | zinc finger CCCH type containing 6                      | 1 | 0  | 0 |
| 231571026 | Zc3h14   | zinc finger CCCH-type containing 14 isoform a           | 0 | 0  | 5 |
| 21313088  | Zcbr1    | zinc finger CCHC-type and RNA binding motif 1           | 0 | 2  | 1 |
| 13195658  | Zfpl1    | zinc finger like protein 1                              | 1 | 1  | 1 |
| 119120797 | Zfp101   | zinc finger protein 101                                 | 1 | 0  | 0 |
| 121247390 | Zfp143   | zinc finger protein 143                                 | 0 | 1  | 0 |
| 6756049   | Zfp148   | zinc finger protein 148                                 | 0 | 3  | 0 |
| 157823865 | Zfp185   | zinc finger protein 185 isoform a                       | 0 | 3  | 1 |
| 47059078  | Zfp191   | zinc finger protein 191                                 | 0 | 0  | 1 |
| 37595742  | Zmym2    | zinc finger protein 198                                 | 0 | 1  | 0 |
| 194328717 | Zfp207   | zinc finger protein 207 isoform 1                       | 0 | 5  | 0 |
| 225007600 | Zfp212   | Zinc finger protein 212 isoform 1                       | 0 | 1  | 0 |
| 225543502 | Zfp219   | zinc finger protein 219                                 | 0 | 1  | 1 |
| 167555112 | Zmym4    | zinc finger protein 262                                 | 0 | 1  | 0 |
| 157823982 | Zfp318   | zinc finger protein 318 isoform 2                       | 1 | 0  | 0 |
| 269784644 | Zfp326   | zinc finger protein 326                                 | 0 | 2  | 6 |
| 6754396   | Zfp346   | zinc finger protein 346                                 | 0 | 4  | 0 |
| 154350211 | Zfp369   | zinc finger protein 369                                 | 1 | 0  | 0 |
| 62526050  | Zfp386   | zinc finger protein 386 (Kruppel-like) isoform b        | 1 | 0  | 0 |
| 113865966 | Zfp397   | zinc finger protein 397                                 | 0 | 0  | 1 |
| 139949213 | Ggnbp2   | zinc finger protein 403                                 | 1 | 0  | 0 |
| 28076891  | Zfp422   | zinc finger protein 422                                 | 0 | 0  | 5 |
| 29789329  | Zfp451   | zinc finger protein 451                                 | 0 | 0  | 1 |
| 194394231 | Zfp507   | zinc finger protein 507                                 | 1 | 0  | 1 |
| 254553392 | Zfp512   | zinc finger protein 512                                 | 0 | 4  | 2 |
| 7305637   | Zfp53    | zinc finger protein 53                                  | 1 | 0  | 0 |
| 270341364 | Zfp574   | zinc finger protein 574                                 | 1 | 0  | 0 |
| 34147169  | Zfp598   | zinc finger protein 598                                 | 1 | 0  | 0 |
| 242397406 | Zfp618   | zinc finger protein 618                                 | 0 | 1  | 0 |
| 21313506  | Zfp623   | zinc finger protein 623                                 | 1 | 0  | 0 |
| 28893273  | Zfp629   | zinc finger protein 629                                 | 0 | 1  | 0 |
| 126723513 | Zfp664   | zinc finger protein 664                                 | 0 | 1  | 0 |
| 27229259  | Zfp687   | zinc finger protein 687                                 | 0 | 4  | 0 |
| 100817090 | Zfp692   | zinc finger protein 692                                 | 0 | 0  | 1 |
| 21312658  | Zfp706   | zinc finger protein 706                                 | 0 | 2  | 0 |
| 123173818 | Zfp715   | zinc finger protein 715                                 | 1 | 0  | 1 |
| 140969612 | Zfp871   | zinc finger protein 871                                 | 0 | 1  | 0 |
| 90669983  | Zfp91    | zinc finger protein 91                                  | 0 | 3  | 1 |
| 21704232  | Zfp810   | zinc finger protein ZFP                                 | 0 | 0  | 1 |
| 168480106 | Zfr      | zinc finger RNA binding protein                         | 0 | 31 | 2 |
| 194473741 | Zkscan17 | zinc finger with KRAB and SCAN domains 17 isoform 1     | 0 | 1  | 0 |
| 224809352 | Zkscan3  | zinc finger with KRAB and SCAN domains 3                | 0 | 1  | 0 |
| 27370072  | Zc3hc1   | zinc finger, C3HC type 1                                | 0 | 1  | 0 |
| 27754058  | Zcchc10  | zinc finger, CCHC domain containing 10                  | 0 | 0  | 1 |
| 83977461  | Zcchc11  | zinc finger, CCHC domain containing 11                  | 0 | 0  | 1 |
| 170016071 | Zcchc2   | zinc finger, CCHC domain containing 2 isoform B         | 0 | 0  | 1 |
| 169808385 | Zcchc8   | zinc finger, CCHC domain containing 8                   | 1 | 5  | 2 |

|           |         |                                              |   |   |   |
|-----------|---------|----------------------------------------------|---|---|---|
| 21450253  | Zdhhc5  | zinc finger, DHHC domain containing 5        | 0 | 0 | 2 |
| 112818584 | Zfyve26 | zinc finger, FYVE domain containing 26       | 1 | 0 | 0 |
| 58037197  | Znhit1  | zinc finger, HIT domain containing 1         | 0 | 2 | 0 |
| 13385046  | Zmat2   | zinc finger, matrin type 2                   | 0 | 0 | 1 |
| 49227135  | Zmym1   | zinc finger, MYM domain containing 1         | 1 | 0 | 0 |
| 91064878  | Zmynd8  | zinc finger, MYND-type containing 8          | 0 | 4 | 1 |
| 74315981  | Zranb2  | zinc finger, RAN-binding domain containing 2 | 0 | 1 | 0 |
| 124053451 | Zzz3    | zinc finger, ZZ domain containing 3          | 0 | 9 | 0 |
| 40254321  | Zhx3    | zinc fingers and homeoboxes 3                | 0 | 7 | 0 |
| 12963579  | Slc30a7 | zinc transporter like 2                      | 2 | 0 | 0 |
| 6756085   | Zyx     | zyxin                                        | 1 | 0 | 0 |

**Suppl. Tab. 2**

Full list of identified proteins; peptide count for the three compartments is given in columns D-F

| GI Accession No. | Gene Symbol   | Protein Name                                                                       | Cytoplasmic extract | Nuclear extract | Nuclear pellet |
|------------------|---------------|------------------------------------------------------------------------------------|---------------------|-----------------|----------------|
| 27228985         | Ndufa12       | 13kDa differentiation-associated protein                                           | 5                   | 1               | 3              |
| 16716395         | Sep15         | 15 kDa selenoprotein precursor                                                     | 4                   | 0               | 0              |
| 254281341        | Agpat1        | 1-acylglycerol-3-phosphate O-acyltransferase 1 isoform 2                           | 1                   | 0               | 1              |
| 23956162         | Agpat2        | 1-acylglycerol-3-phosphate O-acyltransferase 2                                     | 3                   | 0               | 0              |
| 27229077         | Agpat5        | 1-acylglycerol-3-phosphate O-acyltransferase 5                                     | 0                   | 0               | 1              |
| 15809044         | Oas1c         | 2'-5'-oligoadenylate synthetase 1C                                                 | 1                   | 0               | 0              |
| 254540058        | Oas1e         | 2'-5'-oligoadenylate synthetase 1E                                                 | 0                   | 1               | 0              |
| 229576931        | Oas1h         | 2'-5'-oligoadenylate synthetase 1H isoform 1                                       | 0                   | 0               | 1              |
| 21644585         | Oas3          | 2'-5'-oligoadenylate synthetase 3                                                  | 1                   | 0               | 0              |
| 40538842         | E430028B21Rik | 2-phosphodiesterase                                                                | 1                   | 0               | 0              |
| 6753622          | Decr2         | 2,4-dienoyl CoA reductase 2                                                        | 1                   | 6               | 0              |
| 22122591         | Ubxn1         | 2B28                                                                               | 2                   | 0               | 0              |
| 31560355         | Hacl1         | 2-hydroxyacyl-CoA lyase 1                                                          | 1                   | 0               | 0              |
| 147901538        | Ogfd1         | 2-oxoglutarate and iron-dependent oxygenase domain containing 1 isoform 1          | 1                   | 0               | 0              |
| 39652626         | Bpnt1         | 3',5'-bisphosphate nucleotidase 1                                                  | 4                   | 0               | 0              |
| 6754982          | Papss1        | 3-phosphoadenosine 5-phosphosulfate synthase 1                                     | 5                   | 0               | 0              |
| 171543858        | Hmgcl         | 3-hydroxy-3-methylglutaryl CoA lyase                                               | 2                   | 0               | 1              |
| 17921976         | Haao          | 3-hydroxyanthranilate 3,4-dioxygenase                                              | 0                   | 0               | 1              |
| 170014725        | Bdh1          | 3-hydroxybutyrate dehydrogenase, type 1                                            | 1                   | 0               | 2              |
| 21704140         | Hibadh        | 3-hydroxyisobutyrate dehydrogenase precursor                                       | 10                  | 0               | 0              |
| 22122625         | Hibch         | 3-hydroxyisobutyryl-Coenzyme A hydrolase                                           | 10                  | 0               | 0              |
| 244790003        | Mpst          | 3-mercaptopyruvate sulfurtransferase                                               | 5                   | 0               | 1              |
| 31543976         | Ywhag         | 3-monoxygenase/tryptophan 5-monoxygenase activation protein, gamma polypeptide     | 12                  | 7               | 8              |
| 18266680         | Oxct1         | 3-oxoacid CoA transferase 1                                                        | 13                  | 0               | 2              |
| 27754120         | Rbm4b         | 4921506I22Rik protein                                                              | 0                   | 0               | 2              |
| 22122847         | Hpd1          | 4-hydroxyphenylpyruvate dioxygenase-like                                           | 1                   | 0               | 0              |
| 6679066          | Nipsnap1      | 4-nitrophenylphosphatase domain and non-neuronal SNAP25-like protein homolog 1     | 1                   | 0               | 0              |
| 7657031          | Nt5c          | 5',3'-nucleotidase, cytosolic                                                      | 1                   | 0               | 0              |
| 117606214        | Xrn2          | 5',3'-exoribonuclease 2                                                            | 1                   | 17              | 0              |
| 45544618         | Mtap          | 5-methylthioadenosine phosphorylase                                                | 3                   | 0               | 0              |
| 256665238        | Nt5c2         | 5'-nucleotidase, cytosolic II                                                      | 3                   | 0               | 0              |
| 156627553        | Nt5c3l        | 5'-nucleotidase, cytosolic III-like isoform 1                                      | 1                   | 0               | 0              |
| 227908823        | Atic          | 5-aminoimidazole-4-carboxamide ribonucleotide formyltransferase/IMP cyclohydrolase | 22                  | 0               | 0              |
| 31542974         | Htr1d         | 5-hydroxytryptamine (serotonin) receptor 1D                                        | 0                   | 1               | 0              |
| 6680321          | Htr1f         | 5-hydroxytryptamine (serotonin) receptor 1F                                        | 2                   | 0               | 0              |
| 124487479        | Mtr           | 5-methyltetrahydrofolate-homocysteine methyltransferase                            | 0                   | 1               | 0              |
| 21312554         | 2010107E04Rik | 6.8 kDa mitochondrial proteolipid                                                  | 1                   | 0               | 0              |
| 13384778         | Pgls          | 6-phosphogluconolactonase                                                          | 8                   | 0               | 3              |
| 283436121        | Adam29        | a disintegrin and metalloproteinase domain 29                                      | 1                   | 0               | 0              |
| 6680642          | Adam8         | a disintegrin and metalloproteinase domain 8                                       | 2                   | 1               | 0              |
| 110347485        | Adam17        | a disintegrin and metalloproteinase domain 17                                      | 1                   | 0               | 0              |
| 116089327        | Adam2         | a disintegrin and metalloproteinase domain 2 (fertilin beta)                       | 1                   | 0               | 0              |

|           |         |                                                                                              |    |    |    |
|-----------|---------|----------------------------------------------------------------------------------------------|----|----|----|
| 57222280  | Adam26b | a disintegrin and metalloprotease domain 26b                                                 | 1  | 0  | 0  |
| 121949804 | Adam3   | a disintegrin and metalloprotease domain 3 (cyritestin)                                      | 1  | 0  | 0  |
| 160358787 | Adam9   | a disintegrin and metalloprotease domain 9 precursor                                         | 1  | 0  | 0  |
| 57222276  | Adam6b  | a disintegrin and metalloproteinase domain 6-like                                            | 0  | 0  | 1  |
| 27370274  | Adamts4 | a disintegrin-like and metalloprotease (reprolysin type) with thrombospondin type 1 motif, 4 | 0  | 1  | 0  |
| 13626040  | Akap12  | A kinase (PRKA) anchor protein (gravin) 12                                                   | 65 | 1  | 1  |
| 125661048 | Akap9   | A kinase (PRKA) anchor protein (yotiao) 9                                                    | 5  | 0  | 2  |
| 40807354  | Akap10  | A kinase (PRKA) anchor protein 10                                                            | 1  | 0  | 0  |
| 189181672 | Akap13  | A kinase (PRKA) anchor protein 13                                                            | 0  | 0  | 1  |
| 31560394  | Akap8   | A kinase anchor protein 8                                                                    | 5  | 8  | 7  |
| 239985513 | Atad3a  | AAA-ATPase TOB3                                                                              | 4  | 1  | 7  |
| 21312430  | Adck1   | aarF domain containing kinase 1                                                              | 1  | 0  | 0  |
| 269784760 | Abhd10  | abhydrolase domain containing 10                                                             | 3  | 0  | 0  |
| 299473805 | Abhd11  | abhydrolase domain containing 11                                                             | 2  | 0  | 0  |
| 159110817 | Abhd12  | abhydrolase domain containing 12                                                             | 0  | 1  | 0  |
| 171460960 | Abhd14b | abhydrolase domain containing 14b                                                            | 7  | 0  | 0  |
| 31560264  | Abhd6   | abhydrolase domain containing 6                                                              | 0  | 0  | 1  |
| 163965368 | Aim1    | absent in melanoma 1                                                                         | 1  | 0  | 0  |
| 73622271  | Ash1l   | absent, small, or homeotic 1-like                                                            | 0  | 2  | 0  |
| 124487344 | Esf1    | ABT1-associated protein                                                                      | 1  | 0  | 1  |
| 21313520  | Aacs    | acetoacetyl-CoA synthetase                                                                   | 1  | 0  | 1  |
| 21450129  | Acat1   | acetyl-Coenzyme A acetyltransferase 1 precursor                                              | 16 | 14 | 0  |
| 148747461 | Acat2   | acetyl-Coenzyme A acetyltransferase 2                                                        | 2  | 0  | 0  |
| 110625948 | Acat3   | acetyl-Coenzyme A acetyltransferase 3                                                        | 3  | 0  | 0  |
| 18700004  | Acaa1a  | acetyl-Coenzyme A acyltransferase 1                                                          | 16 | 1  | 1  |
| 22122797  | Acaa1b  | acetyl-Coenzyme A acyltransferase 1B                                                         | 1  | 0  | 0  |
| 29126205  | Acaa2   | acetyl-Coenzyme A acyltransferase 2 (mitochondrial 3-oxoacyl-Coenzyme A thiolase)            | 21 | 18 | 4  |
| 157042798 | Acacb   | acetyl-Coenzyme A carboxylase beta                                                           | 2  | 0  | 0  |
| 241982696 | Aaas    | achalasia, adrenocortical insufficiency, alacrimia                                           | 0  | 0  | 3  |
| 226693369 | Gaa     | acid alpha-glucosidase                                                                       | 7  | 0  | 0  |
| 31542070  | Acp1    | acid phosphatase 1, soluble isoform 1                                                        | 4  | 0  | 0  |
| 29150253  | Acp2    | acid phosphatase 2, lysosomal                                                                | 1  | 1  | 0  |
| 66773165  | Acp6    | acid phosphatase 6, lysophosphatidic                                                         | 4  | 0  | 0  |
| 40254600  | Anp32a  | acidic (leucine-rich) nuclear phosphoprotein 32 family, member A                             | 8  | 0  | 2  |
| 18700032  | Anp32b  | acidic (leucine-rich) nuclear phosphoprotein 32 family, member B                             | 7  | 1  | 1  |
| 254587996 | Anp32e  | acidic (leucine-rich) nuclear phosphoprotein 32 family, member E                             | 5  | 0  | 2  |
| 24418931  | Dnttip2 | acidic 82 kDa protein                                                                        | 1  | 0  | 9  |
| 110347487 | Aco1    | aconitase 1                                                                                  | 2  | 0  | 0  |
| 18079339  | Aco2    | aconitase 2, mitochondrial                                                                   | 32 | 0  | 15 |
| 31982370  | Afap111 | actin filament associated protein 1-like 1                                                   | 1  | 0  | 0  |
| 295317359 | Afap112 | actin filament associated protein 1-like 2                                                   | 0  | 0  | 1  |
| 9790221   | Arpc1a  | actin related protein 2/3 complex, subunit 1A                                                | 0  | 1  | 0  |
| 160837788 | Arpc1b  | actin related protein 2/3 complex, subunit 1B                                                | 1  | 12 | 8  |
| 112363072 | Arpc2   | actin related protein 2/3 complex, subunit 2                                                 | 10 | 19 | 12 |
| 9790141   | Arpc3   | actin related protein 2/3 complex, subunit 3                                                 | 4  | 8  | 7  |
| 281427244 | Arpc4   | actin related protein 2/3 complex, subunit 4                                                 | 3  | 8  | 4  |
| 224809382 | Arpc5   | actin related protein 2/3 complex, subunit 5                                                 | 1  | 3  | 3  |
| 21312654  | Arpc5l  | actin related protein 2/3 complex, subunit 5-like                                            | 1  | 8  | 3  |
| 33563240  | Acta1   | actin, alpha 1, skeletal muscle                                                              | 1  | 1  | 1  |
| 30425250  | Actb12  | actin, beta-like 2                                                                           | 3  | 2  | 3  |



|           |          |                                                              |    |    |    |
|-----------|----------|--------------------------------------------------------------|----|----|----|
| 157823889 | Actg2    | actin, gamma 2, smooth muscle, enteric                       | 16 | 21 | 16 |
| 6752954   | Actg1    | actin, gamma, cytoplasmic 1                                  | 19 | 21 | 24 |
| 157057174 | Ablim1   | actin-binding LIM protein 1 isoform 3                        | 0  | 0  | 12 |
| 157951643 | Actn2    | actinin alpha 2                                              | 0  | 1  | 0  |
| 11230802  | Actn4    | actinin alpha 4                                              | 34 | 47 | 30 |
| 61097906  | Actn1    | actinin, alpha 1                                             | 27 | 37 | 24 |
| 189181668 | Actl6a   | actin-like 6A                                                | 1  | 13 | 5  |
| 13937393  | Actl6b   | actin-like 6B                                                | 0  | 3  | 2  |
| 22122825  | Actr2    | actin-related protein 2                                      | 8  | 14 | 11 |
| 13386316  | Actrt2   | actin-related protein T2                                     | 0  | 1  | 0  |
| 31791059  | Alcam    | activated leukocyte cell adhesion molecule                   | 8  | 0  | 0  |
| 20270208  | Ascc2    | activating signal cointegrator 1 complex subunit 2           | 0  | 1  | 0  |
| 225703072 | Ascc3    | activating signal cointegrator 1 complex subunit 3 isoform 2 | 1  | 0  | 0  |
| 86604724  | Atf1     | activating transcription factor 1                            | 0  | 1  | 0  |
| 68799916  | Atf2     | activating transcription factor 2 isoform 1                  | 0  | 1  | 0  |
| 22122557  | Atf7     | activating transcription factor 7                            | 0  | 3  | 0  |
| 22122515  | Ahsa1    | activator of heat shock 90kDa protein ATPase homolog 1       | 3  | 0  | 1  |
| 300192925 | Dbf4     | activator of S phase kinase                                  | 0  | 1  | 0  |
| 160358785 | Acvr2a   | activin A receptor, type IIA precursor                       | 1  | 0  | 1  |
| 90093349  | Adnp     | activity-dependent neuroprotective protein                   | 0  | 1  | 4  |
| 24418933  | Acsf2    | acyl-CoA synthetase family member 2                          | 16 | 0  | 2  |
| 46518528  | AcsI4    | acyl-CoA synthetase long-chain family member 4 isoform 1     | 7  | 0  | 0  |
| 58218988  | AcsI5    | acyl-CoA synthetase long-chain family member 5               | 3  | 0  | 0  |
| 295789127 | Acsm2    | acyl-CoA synthetase medium-chain family member 2A            | 1  | 0  | 0  |
| 30410742  | Acsm4    | acyl-CoA synthetase medium-chain family member 4             | 1  | 0  | 1  |
| 31980996  | Acss2    | acyl-CoA synthetase short-chain family member 2              | 0  | 1  | 0  |
| 6753550   | Acot1    | acyl-CoA thioesterase 1                                      | 4  | 0  | 0  |
| 18482377  | Acot12   | acyl-CoA thioesterase 12                                     | 1  | 0  | 0  |
| 13385260  | Acot13   | acyl-CoA thioesterase 13                                     | 3  | 0  | 0  |
| 238624114 | Acot2    | acyl-CoA thioesterase 2                                      | 4  | 0  | 0  |
| 269308227 | Acot4    | acyl-CoA thioesterase 4                                      | 1  | 0  | 0  |
| 225690614 | Acot7    | acyl-CoA thioesterase 7 isoform 2                            | 6  | 2  | 0  |
| 254587964 | Acot8    | acyl-CoA thioesterase 8                                      | 2  | 4  | 0  |
| 31980998  | Acot9    | acyl-CoA thioesterase 9                                      | 10 | 0  | 0  |
| 31981760  | Acnat2   | acyl-coenzyme A amino acid N-acyltransferase 2               | 0  | 0  | 1  |
| 229608928 | Acbd3    | acyl-Coenzyme A binding domain containing 3                  | 11 | 0  | 0  |
| 156255165 | Acbd5    | acyl-Coenzyme A binding domain containing 5 isoform b        | 1  | 0  | 2  |
| 156255157 | Acad10   | acyl-Coenzyme A dehydrogenase family, member 10              | 1  | 0  | 0  |
| 74271799  | Acad11   | acyl-Coenzyme A dehydrogenase family, member 11              | 0  | 2  | 0  |
| 118403322 | Acad8    | acyl-Coenzyme A dehydrogenase family, member 8               | 5  | 0  | 0  |
| 17647119  | Acadsb   | acyl-Coenzyme A dehydrogenase, short/branched chain          | 7  | 2  | 0  |
| 23956084  | Acadvl   | acyl-Coenzyme A dehydrogenase, very long chain               | 30 | 5  | 2  |
| 66793429  | Acox1    | acyl-Coenzyme A oxidase 1                                    | 12 | 15 | 0  |
| 34328334  | Acox3    | acyl-Coenzyme A oxidase 3                                    | 0  | 0  | 1  |
| 37537518  | Agk      | acylglycerol kinase                                          | 2  | 0  | 0  |
| 13384810  | Acyp1    | acylphosphatase 1                                            | 5  | 2  | 0  |
| 150378458 | Adam10   | ADAM metalloproteinase domain 10                             | 5  | 0  | 1  |
| 10946874  | Adamdec1 | ADAM-like, decysin 1                                         | 0  | 1  | 1  |
| 165905595 | Adamtsl5 | ADAMTS-like 5 isoform 1                                      | 1  | 0  | 1  |
| 88853578  | Ap1b1    | adaptor protein complex AP-1, beta 1 subunit                 | 26 | 19 | 13 |

|           |         |                                                                                      |    |    |    |
|-----------|---------|--------------------------------------------------------------------------------------|----|----|----|
| 56744242  | Ap1g1   | adaptor protein complex AP-1, gamma 1 subunit                                        | 15 | 4  | 3  |
| 160707961 | Ap1g2   | adaptor protein complex AP-1, gamma 2 subunit                                        | 1  | 0  | 0  |
| 160333508 | Ap1m2   | adaptor protein complex AP-1, mu 2 subunit isoform 2                                 | 8  | 1  | 2  |
| 6671559   | Ap1s1   | adaptor protein complex AP-1, sigma 1                                                | 1  | 2  | 0  |
| 116256510 | Ap2a1   | adaptor protein complex AP-2, alpha 1 subunit isoform a                              | 0  | 15 | 8  |
| 163644277 | Ap2a2   | adaptor protein complex AP-2, alpha 2 subunit                                        | 8  | 22 | 14 |
| 6753074   | Ap2m1   | adaptor protein complex AP-2, mu1                                                    | 1  | 13 | 3  |
| 40254484  | Ap1s2   | adaptor-related protein complex 1 sigma 2 subunit                                    | 0  | 1  | 0  |
| 78711838  | Ap2b1   | adaptor-related protein complex 2, beta 1 subunit isoform a                          | 5  | 19 | 11 |
| 161086984 | Ap2s1   | adaptor-related protein complex 2, sigma 1 subunit                                   | 1  | 5  | 0  |
| 163310776 | Ap3b1   | adaptor-related protein complex 3, beta 1 subunit                                    | 2  | 0  | 0  |
| 6671565   | Ap3d1   | adaptor-related protein complex 3, delta 1 subunit                                   | 3  | 0  | 0  |
| 6753078   | Ap3s1   | adaptor-related protein complex 3, sigma 1 subunit                                   | 0  | 0  | 1  |
| 6671557   | Ap1m1   | adaptor-related protein complex AP-1, mu subunit 1                                   | 4  | 0  | 0  |
| 35215317  | Ap1s3   | adaptor-related protein complex AP-1, sigma 3                                        | 1  | 1  | 0  |
| 90568303  | Asx1    | additional sex combs like 1                                                          | 0  | 0  | 1  |
| 156255173 | Add1    | adducin 1 (alpha) isoform 1                                                          | 1  | 14 | 3  |
| 31560504  | Add2    | adducin 2 (beta)                                                                     | 0  | 1  | 0  |
| 255759892 | Add3    | adducin 3 (gamma)                                                                    | 0  | 8  | 0  |
| 118601013 | Aprt    | adenine phosphoribosyltransferase                                                    | 5  | 0  | 5  |
| 110225370 | Apc     | adenomatosis polyposis coli                                                          | 0  | 1  | 0  |
| 117938322 | Apc2    | adenomatosis polyposis coli 2                                                        | 0  | 1  | 1  |
| 226371684 | Adar    | adenosine deaminase, RNA-specific isoform 3                                          | 0  | 1  | 0  |
| 67625747  | Adarb1  | adenosine deaminase, RNA-specific, B1 isoform 2                                      | 0  | 3  | 1  |
| 19527306  | Adk     | adenosine kinase                                                                     | 5  | 0  | 0  |
| 66792802  | Ampd3   | adenosine monophosphate deaminase 3                                                  | 1  | 0  | 0  |
| 61888832  | Adcy1   | adenylate cyclase 1                                                                  | 1  | 0  | 0  |
| 227497595 | Adcy10  | adenylate cyclase 10                                                                 | 1  | 0  | 0  |
| 124244092 | Adcy2   | adenylate cyclase 2                                                                  | 0  | 1  | 0  |
| 86604721  | Adcy6   | adenylate cyclase 6                                                                  | 1  | 0  | 0  |
| 124430532 | Adcy8   | adenylate cyclase 8                                                                  | 1  | 0  | 0  |
| 150378487 | Adcy9   | adenylate cyclase 9                                                                  | 0  | 1  | 0  |
| 77020262  | Ak2     | adenylate kinase 2 isoform b                                                         | 12 | 2  | 0  |
| 23956104  | Ak3     | adenylate kinase 3                                                                   | 14 | 0  | 3  |
| 254675166 | Ak7     | adenylate kinase 7                                                                   | 0  | 0  | 1  |
| 29788764  | Adsl    | adenylosuccinate lyase                                                               | 7  | 0  | 0  |
| 31560737  | Adss    | adenylosuccinate synthase                                                            | 1  | 0  | 0  |
| 6671519   | Adssl1  | adenylosuccinate synthase like 1                                                     | 3  | 0  | 0  |
| 31981027  | Adrm1   | adhesion regulating molecule 1                                                       | 2  | 0  | 0  |
| 144226245 | Pnpla3  | adiponutrin                                                                          | 1  | 0  | 0  |
| 116235489 | Adfp    | adipose differentiation related protein                                              | 10 | 0  | 0  |
| 194353962 | Arf1    | ADP-ribosylation factor 1                                                            | 9  | 8  | 9  |
| 6680720   | Arf4    | ADP-ribosylation factor 4                                                            | 1  | 0  | 2  |
| 6680722   | Arf5    | ADP-ribosylation factor 5                                                            | 3  | 0  | 5  |
| 6680724   | Arf6    | ADP-ribosylation factor 6                                                            | 4  | 6  | 5  |
| 260763915 | Arfgap2 | ADP-ribosylation factor GTPase activating protein 2                                  | 0  | 1  | 0  |
| 156231075 | Arfgef1 | ADP-ribosylation factor guanine nucleotide-exchange factor 1(brefeldin A-inhibited)  | 0  | 0  | 2  |
| 148229140 | Arfgef2 | ADP-ribosylation factor guanine nucleotide-exchange factor 2 (brefeldin A-inhibited) | 1  | 0  | 0  |
| 124487362 | Arfip1  | ADP-ribosylation factor interacting protein 1                                        | 6  | 0  | 1  |
| 228008331 | Arfip2  | ADP-ribosylation factor interacting protein 2                                        | 1  | 0  | 0  |
| 260763874 | Arfrp1  | ADP-ribosylation factor related protein 1                                            | 2  | 0  | 0  |

|           |         |                                                                        |    |     |    |
|-----------|---------|------------------------------------------------------------------------|----|-----|----|
| 153792526 | Arl1    | ADP-ribosylation factor-like 1                                         | 4  | 0   | 5  |
| 13385518  | Arl8b   | ADP-ribosylation factor-like 10C                                       | 2  | 0   | 1  |
| 27369856  | Arl15   | ADP-ribosylation factor-like 15                                        | 1  | 0   | 0  |
| 9789881   | Arl3    | ADP-ribosylation factor-like 3                                         | 2  | 0   | 0  |
| 13384792  | Arl4d   | ADP-ribosylation factor-like 4D                                        | 0  | 0   | 2  |
| 33695144  | Arl5a   | ADP-ribosylation factor-like 5                                         | 0  | 0   | 1  |
| 188528681 | Arl6    | ADP-ribosylation factor-like 6                                         | 0  | 0   | 1  |
| 45433590  | Arl6ip1 | ADP-ribosylation factor-like 6 interacting protein 1                   | 1  | 0   | 0  |
| 119372304 | Atl2    | ADP-ribosylation factor-like 6 interacting protein 2 isoform 1         | 3  | 0   | 0  |
| 14149750  | Arl6ip5 | ADP-ribosylation factor-like 6 interacting protein 5                   | 2  | 0   | 0  |
| 23956194  | Arl8a   | ADP-ribosylation factor-like 8A                                        | 3  | 1   | 3  |
| 254281227 | Arl6ip6 | ADP-ribosylation-like factor 6-interacting protein 6                   | 1  | 0   | 3  |
| 28916671  | Adprh2  | ADP-ribosylhydrolase like 2                                            | 1  | 0   | 0  |
| 160707889 | Aebp1   | AE binding protein 1                                                   | 1  | 0   | 1  |
| 125347464 | Afm     | afamin                                                                 | 0  | 0   | 1  |
| 66792806  | Afg3l1  | AFG3(ATPase family gene 3)-like 1                                      | 2  | 0   | 0  |
| 110625761 | Afg3l2  | AFG3(ATPase family gene 3)-like 2                                      | 1  | 0   | 0  |
| 116875858 | Acan    | aggrecan                                                               | 1  | 0   | 0  |
| 42490751  | Agrn    | agrln                                                                  | 0  | 1   | 0  |
| 90403607  | Ahnak   | AHNAK nucleoprotein isoform 1                                          | 62 | 146 | 78 |
| 31981662  | Jub     | ajuba                                                                  | 0  | 0   | 1  |
| 110347489 | Akap1   | A-kinase anchor protein 1                                              | 0  | 0   | 3  |
| 86604728  | Akirin2 | akirin 2                                                               | 1  | 0   | 1  |
| 190883484 | Akt3    | AKT3 kinase                                                            | 0  | 1   | 0  |
| 34610207  | Aars    | alanyl-tRNA synthetase                                                 | 12 | 1   | 0  |
| 52630311  | Aars2   | alanyl-tRNA synthetase 2, mitochondrial                                | 1  | 0   | 0  |
| 163310765 | Alb     | albumin                                                                | 0  | 1   | 0  |
| 6724311   | Adh1    | alcohol dehydrogenase 1 (class I)                                      | 1  | 0   | 0  |
| 34328288  | Aldh3b1 | aldehyde dehydrogenase 3 family, member B1                             | 3  | 1   | 2  |
| 163310771 | Aldh3a1 | aldehyde dehydrogenase 3A1                                             | 1  | 0   | 1  |
| 75677435  | Aldh3a2 | aldehyde dehydrogenase 3A2                                             | 4  | 0   | 1  |
| 225543103 | Aldh4a1 | aldehyde dehydrogenase 4A1                                             | 1  | 0   | 0  |
| 115334671 | Aldh9a1 | aldehyde dehydrogenase 9A1                                             | 6  | 1   | 0  |
| 7106242   | Aldh1a7 | aldehyde dehydrogenase family 1, subfamily A7                          | 1  | 0   | 0  |
| 19527258  | Aldh6a1 | aldehyde dehydrogenase family 6, subfamily A1                          | 18 | 0   | 0  |
| 110347467 | Aox1    | aldehyde oxidase 1                                                     | 1  | 0   | 0  |
| 56606023  | Aox3l1  | aldehyde oxidase 3-like 1                                              | 1  | 0   | 0  |
| 27369748  | Aldh5a1 | aldehyde dehydrogenase family 5, subfamily A1                          | 2  | 0   | 0  |
| 10946870  | Akr1a4  | aldo-keto reductase family 1, member A4 (aldehyde reductase)           | 1  | 0   | 0  |
| 160707894 | Akr1b3  | aldo-keto reductase family 1, member B1                                | 13 | 0   | 3  |
| 160415215 | Akr1b7  | aldo-keto reductase family 1, member B7                                | 1  | 0   | 0  |
| 85719330  | Akr1c12 | aldo-keto reductase family 1, member C12                               | 3  | 0   | 0  |
| 171846276 | Akr1c13 | aldo-keto reductase family 1, member C13                               | 2  | 0   | 0  |
| 282398141 | Akr1c19 | aldo-keto reductase family 1, member C19                               | 7  | 0   | 1  |
| 16905111  | Akr1c20 | aldo-keto reductase family 1, member C20                               | 0  | 0   | 1  |
| 240120054 | Akr7a5  | aldo-keto reductase family 7, member A5 (aflatoxin aldehyde reductase) | 2  | 0   | 0  |
| 60687506  | Aldoc   | aldolase C, fructose-bisphosphate                                      | 3  | 0   | 0  |
| 110347479 | Akp3    | alkaline phosphatase 3, intestine, not Mn requiring                    | 0  | 1   | 0  |
| 31044423  | Alkbh5  | alkB, alkylation repair homolog 5                                      | 0  | 4   | 0  |
| 61675696  | Alkbh8  | alkB, alkylation repair homolog 8                                      | 0  | 1   | 0  |
| 295444834 | Agps    | alkyldihydroxyacetone phosphate synthase                               | 6  | 6   | 3  |

|           |               |                                                                         |    |    |   |
|-----------|---------------|-------------------------------------------------------------------------|----|----|---|
| 21553105  | Aif1l         | allograft inflammatory factor 1-like                                    | 2  | 3  | 1 |
| 219689066 | 1500010J02Rik | alpha accessory factor 132 isoform a                                    | 0  | 1  | 0 |
| 38194222  | Mare          | alpha globin regulatory element containing                              | 1  | 0  | 1 |
| 8394027   | Ppp2r1a       | alpha isoform of regulatory subunit A, protein phosphatase 2            | 17 | 16 | 5 |
| 254540097 | 3222402P14Rik | alpha isoform of regulatory subunit B, protein phosphatase 2            | 0  | 1  | 0 |
| 154091016 | Atrx          | alpha thalassemia/mental retardation syndrome X-linked homolog          | 1  | 1  | 4 |
| 172072657 | Alg2          | alpha-1,3-mannosyltransferase ALG2                                      | 2  | 0  | 0 |
| 255003748 | Alg3          | alpha-1,3-mannosyltransferase ALG3                                      | 0  | 0  | 1 |
| 70980543  | St8sia1       | alpha-2,8-sialyltransferase 1                                           | 0  | 1  | 0 |
| 242118003 | Wdr81         | alpha-2-plasmin inhibitor                                               | 1  | 1  | 0 |
| 121247277 | Defa26        | alpha-defensin, 26                                                      | 1  | 1  | 1 |
| 254910995 | Naglu         | alpha-N-acetylglucosaminidase                                           | 6  | 2  | 1 |
| 237757295 | Als2          | alsin isoform 1                                                         | 1  | 0  | 0 |
| 6753044   | Ambn          | ameloblastin                                                            | 0  | 0  | 1 |
| 77404288  | Accn1         | amiloride-sensitive cation channel 1, neuronal isoform a                | 0  | 1  | 0 |
| 224994233 | Kdm1          | amine oxidase (flavin containing) domain 2                              | 1  | 18 | 4 |
| 288541337 | Aimp2         | aminoacyl tRNA synthetase complex-interacting multifunctional protein 2 | 3  | 0  | 0 |
| 171184418 | C630028N24Rik | aminoglycoside phosphotransferase domain containing 1                   | 0  | 1  | 0 |
| 62000670  | Amt           | aminomethyltransferase                                                  | 0  | 1  | 0 |
| 110625916 | 201011101Rik  | aminopeptidase O                                                        | 0  | 1  | 0 |
| 68226731  | Npepps        | aminopeptidase puromycin sensitive                                      | 9  | 0  | 0 |
| 47523981  | Npepl1        | aminopeptidase-like 1                                                   | 2  | 0  | 0 |
| 334848200 | Ammecr1l      | AMME chromosomal region gene 1-like                                     | 1  | 0  | 0 |
| 23956234  | Prkab1        | AMP-activated protein kinase beta 1 non-catalytic subunit               | 0  | 0  | 1 |
| 282847331 | Prkag2        | AMP-activated protein kinase gamma2 subunit                             | 1  | 0  | 0 |
| 124107596 | Prkag1        | AMP-activated protein kinase, noncatalytic gamma-1 subunit              | 4  | 0  | 4 |
| 124486747 | Agl           | amylase-1,6-glucosidase, 4-alpha-glucanotransferase                     | 1  | 0  | 0 |
| 311893408 | App           | amyloid beta (A4) precursor protein                                     | 6  | 2  | 0 |
| 319738665 | Apbb2         | amyloid beta (A4) precursor protein-binding, family B, member 2         | 0  | 1  | 0 |
| 156255194 | Appl2         | amyloid beta (A4) precursor-like protein 2 isoform c                    | 3  | 2  | 1 |
| 228008323 | Anapc1        | anaphase promoting complex subunit 1                                    | 1  | 2  | 0 |
| 35900980  | Anapc10       | anaphase promoting complex subunit 10                                   | 0  | 2  | 0 |
| 254281282 | Anapc7        | anaphase promoting complex subunit 7                                    | 0  | 3  | 0 |
| 7304901   | Ar            | androgen receptor                                                       | 0  | 1  | 0 |
| 34328275  | Aggf1         | angiogenic factor with G patch and FHA domains 1                        | 0  | 0  | 1 |
| 119120838 | Amotl2        | angiominin like 2                                                       | 0  | 1  | 0 |
| 124487107 | Amotl1        | angiominin-like 1                                                       | 1  | 0  | 0 |
| 255308873 | Angptl4       | angiopoietin-like 4                                                     | 1  | 0  | 0 |
| 31542119  | Agtrap        | angiotensin II receptor-associated protein                              | 1  | 0  | 0 |
| 251823794 | Anln          | anillin                                                                 | 0  | 1  | 0 |
| 261862329 | Rai14         | ankycorbin                                                              | 0  | 1  | 6 |
| 116256505 | Ank3          | ankyrin 3, epithelial isoform c                                         | 0  | 3  | 0 |
| 172088123 | Abtb1         | ankyrin repeat and BTB (POZ) domain containing 1                        | 0  | 1  | 0 |
| 85702366  | Ankfy1        | ankyrin repeat and FYVE domain containing 1                             | 1  | 0  | 0 |
| 268370092 | Asb15         | ankyrin repeat and SOCS box-containing 15                               | 1  | 0  | 0 |
| 18252776  | Asb5          | ankyrin repeat and SOCS box-containing 5                                | 0  | 1  | 0 |
| 114205426 | Asb3          | ankyrin repeat and SOCS box-containing protein 3                        | 1  | 0  | 0 |

|           |          |                                                                                          |    |    |    |
|-----------|----------|------------------------------------------------------------------------------------------|----|----|----|
| 17505202  | Asb4     | ankyrin repeat and SOCS box-containing protein 4                                         | 1  | 0  | 0  |
| 31088892  | Anks1    | ankyrin repeat and sterile alpha motif domain containing 1                               | 0  | 1  | 1  |
| 323423025 | Ankrd11  | ankyrin repeat domain 11                                                                 | 0  | 0  | 1  |
| 71834683  | Ankrd12  | ankyrin repeat domain 12                                                                 | 0  | 1  | 0  |
| 61651675  | Ankrd13a | ankyrin repeat domain 13a                                                                | 0  | 0  | 1  |
| 67972431  | Ankrd13c | ankyrin repeat domain 13c                                                                | 0  | 0  | 1  |
| 261878577 | Ankrd24  | ankyrin repeat domain 24                                                                 | 1  | 0  | 0  |
| 160333753 | Kank2    | ankyrin repeat domain 25                                                                 | 0  | 0  | 1  |
| 124487433 | Ankrd26  | ankyrin repeat domain 26                                                                 | 1  | 0  | 0  |
| 167466274 | Ankrd32  | ankyrin repeat domain 32                                                                 | 1  | 0  | 0  |
| 268607611 | Ankrd50  | ankyrin repeat domain 50                                                                 | 1  | 0  | 0  |
| 268370084 | Ankrd53  | ankyrin repeat domain 53                                                                 | 0  | 1  | 0  |
| 270288786 | Ankrd55  | ankyrin repeat domain 55                                                                 | 0  | 0  | 1  |
| 124286856 | Ankfn1   | ankyrin-repeat and fibronectin type III domain containing 1                              | 1  | 0  | 0  |
| 124517663 | Anxa1    | annexin A1                                                                               | 26 | 0  | 2  |
| 160707921 | Anxa11   | annexin A11                                                                              | 9  | 0  | 2  |
| 6996913   | Anxa2    | annexin A2                                                                               | 6  | 18 | 5  |
| 160707925 | Anxa3    | annexin A3                                                                               | 1  | 0  | 0  |
| 161016799 | Anxa4    | annexin A4                                                                               | 18 | 2  | 1  |
| 6753060   | Anxa5    | annexin A5                                                                               | 19 | 0  | 4  |
| 31981302  | Anxa6    | annexin A6 isoform a                                                                     | 28 | 1  | 1  |
| 160707958 | Anxa7    | annexin A7                                                                               | 5  | 0  | 1  |
| 145864497 | Anxa9    | annexin A9                                                                               | 10 | 19 | 18 |
| 334278902 | Ano1     | anoctamin 1, calcium activated chloride channel                                          | 0  | 0  | 1  |
| 40254290  | Ano6     | anoctamin 6                                                                              | 4  | 0  | 0  |
| 164663750 | Amn1     | antagonist of mitotic exit network 1 homolog                                             | 1  | 0  | 0  |
| 169234624 | Mki67    | antigen identified by monoclonal antibody Ki 67                                          | 1  | 8  | 1  |
| 33859684  | Kin      | antigenic determinant of rec-A protein                                                   | 1  | 1  | 0  |
| 258613873 | Apip     | APAF1 interacting protein                                                                | 2  | 0  | 0  |
| 39930509  | Mapre3   | APC-binding protein EB2                                                                  | 0  | 1  | 0  |
| 6753014   | Aplnr    | apelin receptor                                                                          | 0  | 0  | 1  |
| 6753086   | Apex1    | APEX nuclease 1                                                                          | 5  | 17 | 2  |
| 21553309  | Apoa1bp  | apolipoprotein A-I binding protein                                                       | 6  | 0  | 0  |
| 161702988 | Apob     | apolipoprotein B precursor                                                               | 1  | 2  | 0  |
| 313569874 | Apoo     | apolipoprotein O                                                                         | 2  | 0  | 1  |
| 13386062  | Apool    | apolipoprotein O-like                                                                    | 2  | 0  | 7  |
| 9790013   | Aatf     | apoptosis antagonizing transcription factor                                              | 0  | 0  | 5  |
| 94158994  | Api5     | apoptosis inhibitor 5                                                                    | 2  | 19 | 3  |
| 30017355  | Aifm2    | apoptosis-inducing factor (AIF)-like mitochondrion-associated inducer of death isoform 2 | 1  | 1  | 2  |
| 6755004   | Aifm1    | apoptosis-inducing factor, mitochondrion-associated 1                                    | 23 | 2  | 9  |
| 194394197 | Acin1    | apoptotic chromatin condensation inducer 1 isoform 2                                     | 0  | 18 | 14 |
| 160415209 | Aqp2     | aquaporin 2                                                                              | 4  | 1  | 3  |
| 163644327 | Aqr      | aquarius                                                                                 | 0  | 13 | 11 |
| 31542127  | Alox12   | arachidonate 12-lipoxygenase                                                             | 1  | 0  | 0  |
| 75812978  | Amz2     | archaemetzincins-2                                                                       | 0  | 0  | 1  |
| 148747410 | Arcn1    | archain 1                                                                                | 12 | 0  | 2  |
| 33563260  | Agfg1    | ArfGAP with FG repeats 1                                                                 | 0  | 1  | 0  |
| 189458894 | Arap2    | ArfGAP with RhoGAP domain, ankyrin repeat and PH domain 2                                | 0  | 0  | 1  |
| 206597526 | Ddef2    | ArfGAP with SH3 domain, ankyrin repeat and PH domain 2 isoform b                         | 0  | 1  | 1  |
| 7106255   | Arg1     | arginase 1                                                                               | 1  | 0  | 0  |

|           |         |                                                              |    |    |    |
|-----------|---------|--------------------------------------------------------------|----|----|----|
| 6753110   | Arg2    | arginase 2                                                   | 14 | 0  | 0  |
| 134152669 | Arglu1  | arginine and glutamate rich 1                                | 1  | 0  | 0  |
| 269973913 | Sfrs14  | arginine/serine-rich 14 splicing factor                      | 0  | 1  | 0  |
| 53988376  | Rsrc2   | arginine/serine-rich coiled-coil 2 isoform 1                 | 0  | 1  | 0  |
| 224967104 | Sfrs6   | arginine/serine-rich splicing factor 6                       | 5  | 2  | 5  |
| 29244056  | Cdnf    | arginine-rich, mutated in early stage tumors-like 1          | 0  | 1  | 0  |
| 19526986  | Asl     | argininosuccinate lyase                                      | 2  | 0  | 0  |
| 6996911   | Ass1    | argininosuccinate synthetase 1                               | 2  | 0  | 0  |
| 318065085 | Rnpepl1 | arginyl aminopeptidase (aminopeptidase B)-like 1             | 0  | 0  | 1  |
| 227499234 | Rnpep   | arginyl aminopeptidase isoform 1                             | 8  | 0  | 1  |
| 262118273 | Rars    | arginyl-tRNA synthetase                                      | 21 | 2  | 0  |
| 167900462 | Armc2   | armadillo repeat containing 2                                | 1  | 0  | 1  |
| 124487327 | Armc3   | armadillo repeat containing 3                                | 1  | 0  | 0  |
| 124487093 | Armc4   | armadillo repeat containing 4                                | 1  | 0  | 1  |
| 261824009 | Armcx1  | armadillo repeat containing, X-linked 1                      | 0  | 0  | 2  |
| 40254129  | Arvcf   | armadillo repeat gene deleted in velo-cardio-facial syndrome | 0  | 0  | 2  |
| 21312676  | Armc1   | armadillo repeat-containing protein                          | 1  | 0  | 0  |
| 8392847   | Actr1a  | ARP1 actin-related protein 1 homolog A, centractin alpha     | 7  | 9  | 1  |
| 22122615  | Actr1b  | ARP1 actin-related protein 1 homolog B, centractin beta      | 2  | 1  | 0  |
| 329664973 | Actr3   | ARP3 actin-related protein 3 homolog                         | 10 | 17 | 12 |
| 52345394  | Actr3b  | ARP3 actin-related protein 3 homolog B                       | 1  | 3  | 1  |
| 91176335  | Actr5   | ARP5 actin-related protein 5 homolog                         | 0  | 7  | 0  |
| 188528622 | Actr8   | ARP8 actin-related protein 8 homolog                         | 0  | 2  | 0  |
| 30089716  | Arrb1   | arrestin, beta 1 isoform A                                   | 1  | 0  | 0  |
| 12025542  | Asna1   | arsA arsenite transporter, ATP-binding, homolog 1            | 4  | 0  | 1  |
| 158186674 | Srrt    | arsenate resistance protein 2 isoform 1                      | 4  | 23 | 4  |
| 30520239  | Nceh1   | arylacetamide deacetylase-like 1                             | 10 | 0  | 1  |
| 7709982   | Aip     | aryl-hydrocarbon receptor-interacting protein                | 5  | 0  | 0  |
| 67972647  | Arsa    | arylsulfatase A                                              | 7  | 0  | 0  |
| 125656171 | Arsb    | arylsulfatase B                                              | 1  | 1  | 0  |
| 13384964  | Asf1a   | ASF1 anti-silencing function 1 homolog A                     | 0  | 5  | 0  |
| 124248552 | Ash2l   | ash2-like isoform b                                          | 0  | 9  | 1  |
| 6753126   | Asgr1   | asialoglycoprotein receptor 1                                | 1  | 0  | 0  |
| 33469123  | Asns    | asparagine synthetase                                        | 2  | 0  | 0  |
| 13195608  | Alg14   | asparagine-linked glycosylation 14 homolog                   | 0  | 0  | 1  |
| 19527202  | Alg9    | asparagine-linked glycosylation 9 protein                    | 0  | 0  | 1  |
| 157951696 | Nars2   | asparaginyl-tRNA synthetase 2, mitochondrial                 | 0  | 0  | 1  |
| 219276601 | Nars    | asparaginyl-tRNA synthetase isoform 2                        | 2  | 6  | 0  |
| 295390613 | Asph    | aspartate beta-hydroxylase isoform 1                         | 13 | 1  | 4  |
| 21312002  | Aspdh   | aspartate dehydrogenase                                      | 1  | 0  | 1  |
| 31982632  | Acy3    | aspartoacylase 3                                             | 1  | 0  | 0  |
| 161016822 | Dnpep   | aspartyl aminopeptidase isoform b                            | 9  | 0  | 0  |
| 326439050 | Aga     | aspartylglucosaminidase                                      | 5  | 0  | 0  |
| 27369928  | Dars2   | aspartyl-tRNA synthetase 2, mitochondrial                    | 1  | 0  | 0  |
| 210147402 | Dars    | aspartyl-tRNA synthetase isoform 1                           | 23 | 19 | 1  |
| 258679481 | Aste1   | asteroid homolog 1                                           | 0  | 0  | 1  |
| 327199303 | Astn1   | astrotactin 1                                                | 0  | 1  | 0  |
| 158508460 | Ahctf1  | AT hook containing transcription factor 1                    | 0  | 2  | 9  |
| 110225364 | Zfhx3   | AT motif binding factor 1                                    | 0  | 1  | 0  |
| 124249109 | Arid1a  | AT rich interactive domain 1A                                | 0  | 5  | 1  |
| 145553997 | Arid1b  | AT rich interactive domain 1B (Swi1 like)                    | 0  | 1  | 0  |
| 262231796 | Arid2   | AT rich interactive domain 2 (ARID, RFX-like)                | 0  | 4  | 0  |

|           |          |                                                                                   |    |   |    |
|-----------|----------|-----------------------------------------------------------------------------------|----|---|----|
| 189339266 | Atr      | ataxia telangiectasia and rad3 related                                            | 1  | 0 | 0  |
| 163838660 | Atm      | ataxia telangiectasia mutated                                                     | 0  | 2 | 0  |
| 30520029  | Atcay    | ataxia, cerebellar, Cayman type homolog                                           | 1  | 1 | 1  |
| 83649709  | Atxn10   | ataxin 10                                                                         | 1  | 0 | 1  |
| 33942089  | Atxn2l   | ataxin 2-like                                                                     | 1  | 1 | 0  |
| 295317311 | Atxn7l1  | ataxin 7-like 1 isoform 2                                                         | 1  | 0 | 0  |
| 30519971  | Atl1     | atlastin GTPase 1                                                                 | 1  | 0 | 0  |
| 254826718 | Atl3     | atlastin GTPase 3 isoform 2                                                       | 13 | 0 | 0  |
| 239049657 | Atmin    | ATM interactor                                                                    | 0  | 0 | 1  |
| 313151222 | Acly     | ATP citrate lyase                                                                 | 21 | 0 | 1  |
| 34538602  | ATP8     | ATP synthase F0 subunit 8                                                         | 2  | 1 | 1  |
| 78214312  | Atp5f1   | ATP synthase, H+ transporting, mitochondrial F0 complex, subunit b, isoform 1     | 7  | 3 | 8  |
| 21313679  | Atp5h    | ATP synthase, H+ transporting, mitochondrial F0 complex, subunit d                | 7  | 1 | 9  |
| 10181184  | Atp5j2   | ATP synthase, H+ transporting, mitochondrial F0 complex, subunit f, isoform 2     | 2  | 0 | 2  |
| 31980744  | Atp5l    | ATP synthase, H+ transporting, mitochondrial F0 complex, subunit G                | 1  | 0 | 2  |
| 6680748   | Atp5a1   | ATP synthase, H+ transporting, mitochondrial F1 complex, alpha subunit, isoform 1 | 33 | 5 | 20 |
| 166851828 | Atp5d    | ATP synthase, H+ transporting, mitochondrial F1 complex, delta subunit precursor  | 6  | 3 | 2  |
| 13385484  | Atp5e    | ATP synthase, H+ transporting, mitochondrial F1 complex, epsilon subunit          | 2  | 0 | 0  |
| 163838648 | Atp5c1   | ATP synthase, H+ transporting, mitochondrial F1 complex, gamma subunit isoform a  | 11 | 1 | 6  |
| 20070412  | Atp5o    | ATP synthase, H+ transporting, mitochondrial F1 complex, O subunit                | 10 | 7 | 9  |
| 83715998  | Atp5k    | ATP synthase, H+ transporting, mitochondrial F1F0 complex, subunit e              | 5  | 1 | 2  |
| 160420289 | Agbl2    | ATP/GTP binding protein-like 2                                                    | 0  | 0 | 1  |
| 31560168  | Atad1    | ATPase family, AAA domain containing 1                                            | 1  | 0 | 8  |
| 91199557  | Atad2    | ATPase family, AAA domain containing 2                                            | 0  | 0 | 31 |
| 153791220 | Atad2b   | ATPase family, AAA domain containing 2B                                           | 0  | 0 | 23 |
| 22122505  | Atad4    | ATPase family, AAA domain containing 4                                            | 0  | 0 | 1  |
| 31982864  | Atpif1   | ATPase inhibitory factor 1                                                        | 6  | 4 | 0  |
| 283135194 | Atp13a1  | ATPase type 13A1                                                                  | 0  | 1 | 0  |
| 261599069 | Atp13a4  | ATPase type 13A4                                                                  | 0  | 1 | 0  |
| 36031132  | Atp2a1   | ATPase, Ca++ transporting, fast twitch 1                                          | 6  | 0 | 0  |
| 158635979 | Atp2a2   | ATPase, Ca++ transporting, slow twitch 2 isoform b                                | 8  | 0 | 0  |
| 189339256 | Atp2c2   | ATPase, Ca++ transporting, type 2C, member 2                                      | 0  | 0 | 1  |
| 157671921 | Atp8b4   | ATPase, class I, type 8B, member 4                                                | 0  | 0 | 1  |
| 320089590 | Atp9b    | ATPase, class II, type 9B                                                         | 1  | 0 | 0  |
| 157951686 | Atp10a   | ATPase, class V, type 10A                                                         | 0  | 0 | 1  |
| 294979203 | Atp10d   | ATPase, class V, type 10D                                                         | 0  | 1 | 0  |
| 7656914   | Atp11a   | ATPase, class VI, type 11A                                                        | 1  | 0 | 0  |
| 157951682 | Atp7a    | ATPase, Cu++ transporting, alpha polypeptide isoform 2                            | 2  | 0 | 0  |
| 12025532  | Atp6v0a1 | ATPase, H+ transporting, lysosomal V0 subunit a1                                  | 0  | 0 | 4  |
| 83627707  | Atp6v0a2 | ATPase, H+ transporting, lysosomal V0 subunit A2                                  | 0  | 0 | 1  |
| 6753144   | Atp6v0c  | ATPase, H+ transporting, lysosomal V0 subunit C                                   | 1  | 0 | 3  |
| 31560731  | Atp6v1a  | ATPase, H+ transporting, lysosomal V1 subunit A                                   | 19 | 0 | 16 |
| 189339262 | Atp6v1c1 | ATPase, H+ transporting, lysosomal V1 subunit C1                                  | 2  | 0 | 1  |
| 31981588  | Atp6v1h  | ATPase, H+ transporting, lysosomal V1 subunit H                                   | 5  | 0 | 5  |
| 31981304  | Atp6v0d1 | ATPase, H+ transporting, V0 subunit D isoform 1                                   | 11 | 1 | 10 |

|           |               |                                                                                       |    |   |    |
|-----------|---------------|---------------------------------------------------------------------------------------|----|---|----|
| 12963799  | Atp6v1d       | ATPase, H <sup>+</sup> transporting, V1 subunit D                                     | 2  | 0 | 0  |
| 116292744 | Abca13        | ATP-binding cassette transporter                                                      | 0  | 1 | 0  |
| 225703056 | Abca12        | ATP-binding cassette, sub-family A (ABC1), member 12                                  | 1  | 0 | 2  |
| 88853071  | Abca3         | ATP-binding cassette, sub-family A (ABC1), member 3                                   | 1  | 0 | 0  |
| 262118230 | Abca6         | ATP-binding cassette, sub-family A (ABC1), member 6                                   | 0  | 0 | 1  |
| 254911033 | Abca8b        | ATP-binding cassette, sub-family A (ABC1), member 8b                                  | 0  | 1 | 0  |
| 15451840  | Abca7         | ATP-binding cassette, sub-family A, member 7                                          | 1  | 0 | 0  |
| 169234938 | Abcb7         | ATP-binding cassette, sub-family B (MDR/TAP), member 7                                | 6  | 0 | 0  |
| 153791547 | Abcb1a        | ATP-binding cassette, subfamily B, member 1A                                          | 0  | 1 | 0  |
| 90403595  | Abcc3         | ATP-binding cassette, sub-family C (CFTR/MRP), member 3                               | 2  | 0 | 0  |
| 255683328 | Abcc4         | ATP-binding cassette, sub-family C (CFTR/MRP), member 4                               | 3  | 0 | 0  |
| 6678848   | Abcc1         | ATP-binding cassette, sub-family C, member 1                                          | 10 | 0 | 2  |
| 6671497   | Abcd1         | ATP-binding cassette, sub-family D, member 1                                          | 0  | 1 | 0  |
| 60218877  | Abcd3         | ATP-binding cassette, sub-family D, member 3                                          | 16 | 0 | 22 |
| 114205431 | Abce1         | ATP-binding cassette, subfamily E, member 1                                           | 4  | 0 | 0  |
| 39930335  | Abcf1         | ATP-binding cassette, sub-family F (GCN20), member 1                                  | 5  | 5 | 0  |
| 299473734 | Abcf2         | ATP-binding cassette, sub-family F (GCN20), member 2                                  | 0  | 5 | 0  |
| 283436205 | Atrip         | ATR interacting protein                                                               | 1  | 0 | 0  |
| 116268115 | Auh           | AU RNA binding protein/enoyl-Coenzyme A hydratase                                     | 1  | 0 | 0  |
| 6753020   | Aire          | autoimmune regulator (autoimmune polyendocrinopathy candidiasis ectodermal dystrophy) | 0  | 1 | 0  |
| 31982053  | Relb          | avian reticuloendotheliosis viral (v-rel) oncogene related B                          | 0  | 0 | 1  |
| 13386102  | Rnaseh2c      | AYP1 protein                                                                          | 0  | 4 | 0  |
| 145587077 | Bdp1          | B double prime 1, subunit of RNA polymerase III transcription initiation factor IIIB  | 0  | 1 | 1  |
| 124107600 | Birc1f        | baculoviral IAP repeat-containing 1f                                                  | 0  | 0 | 1  |
| 59859890  | Birc5         | baculoviral IAP repeat-containing 5 isoform 1                                         | 0  | 1 | 0  |
| 133922596 | Birc6         | baculoviral IAP repeat-containing 6                                                   | 8  | 0 | 0  |
| 169658369 | Bahcc1        | BAH domain and coiled-coil containing 1                                               | 0  | 1 | 0  |
| 21313234  | Baiap2l1      | BAI1-associated protein 2-like 1                                                      | 0  | 5 | 1  |
| 46519149  | Heatr1        | BAP28 protein                                                                         | 0  | 3 | 29 |
| 84042521  | Banf1         | barrier to autointegration factor 1                                                   | 2  | 2 | 7  |
| 10048460  | Bcam          | basal cell adhesion molecule                                                          | 4  | 0 | 0  |
| 85701808  | BC013712      | basement membrane-induced protein                                                     | 0  | 1 | 0  |
| 213512915 | Uqcc          | basic FGF repressed, zinc binding protein                                             | 3  | 4 | 3  |
| 148287018 | Bhlhb9        | basic helix-loop-helix domain containing, class B9                                    | 0  | 1 | 0  |
| 6755680   | Bhlhe40       | basic helix-loop-helix family, member e40                                             | 0  | 0 | 1  |
| 13385296  | Bzw1          | basic leucine zipper and W2 domains 1                                                 | 2  | 0 | 0  |
| 31981160  | Bzw2          | basic leucine zipper and W2 domains 2                                                 | 1  | 0 | 1  |
| 237649007 | Blzf1         | basic leucine zipper nuclear factor 1 isoform a                                       | 0  | 0 | 1  |
| 281485611 | Btf3          | basic transcription factor 3                                                          | 5  | 3 | 0  |
| 29789195  | Btf3l4        | basic transcription factor 3-like 4                                                   | 3  | 1 | 0  |
| 116014342 | Bsg           | basigin isoform 1                                                                     | 10 | 0 | 0  |
| 124487407 | Bsn           | bassoon protein                                                                       | 0  | 2 | 0  |
| 22296593  | Bcl7a         | B-cell CLL/lymphoma 7A                                                                | 0  | 2 | 0  |
| 6753176   | Bcl7c         | B-cell CLL/lymphoma 7C                                                                | 0  | 2 | 1  |
| 56606137  | Bcl9          | B-cell CLL/lymphoma 9                                                                 | 0  | 1 | 0  |
| 6671620   | Bcap29        | B-cell receptor-associated protein 29                                                 | 2  | 0 | 1  |
| 31981310  | Bcap31        | B-cell receptor-associated protein 31                                                 | 7  | 0 | 3  |
| 126723336 | Phb2          | B-cell receptor-associated protein 37                                                 | 16 | 3 | 13 |
| 21312030  | 1110007C09Rik | Bcl10-interacting protein with Card                                                   | 0  | 0 | 2  |



|           |          |                                                                                        |    |    |   |
|-----------|----------|----------------------------------------------------------------------------------------|----|----|---|
| 33239415  | Ptrh2    | Bcl-2 inhibitor of transcription isoform a                                             | 4  | 2  | 5 |
| 255003752 | Bnip1    | BCL2/adenovirus E1B interacting protein 1                                              | 4  | 0  | 0 |
| 111955302 | Bak1     | BCL2-antagonist/killer 1                                                               | 2  | 0  | 7 |
| 6671610   | Bad      | BCL2-associated agonist of cell death                                                  | 1  | 0  | 0 |
| 21703784  | Bag2     | Bcl2-associated athanogene 2                                                           | 3  | 3  | 8 |
| 70906449  | Bclaf1   | BCL2-associated transcription factor 1 isoform 2                                       | 2  | 3  | 5 |
| 6680770   | Bax      | Bcl2-associated X protein                                                              | 1  | 0  | 0 |
| 23943828  | Bcl2l13  | BCL2-like 13                                                                           | 7  | 0  | 0 |
| 7949082   | Bok      | BCL2-related ovarian killer protein                                                    | 0  | 0  | 1 |
| 269995993 | Bcor     | BCL-6 interacting corepressor isoform d                                                | 0  | 1  | 1 |
| 21313544  | Bcs1l    | BCS1-like                                                                              | 2  | 0  | 0 |
| 46909609  | B3gat2   | beta-1,3-glucuronyltransferase 2                                                       | 0  | 1  | 0 |
| 189339268 | B4galnt1 | beta-1,4-N-acetyl-galactosaminyl transferase 1 isoform 1                               | 2  | 0  | 0 |
| 7709990   | Bhmt     | betaine-homocysteine methyltransferase                                                 | 1  | 0  | 0 |
| 225543122 | Bace1    | beta-site APP cleaving enzyme 1 isoform 1                                              | 1  | 0  | 0 |
| 163838766 | Bicd1    | bicaudal D homolog 1 isoform 2                                                         | 1  | 0  | 1 |
| 124487331 | Blvra    | biliverdin reductase A                                                                 | 4  | 0  | 0 |
| 21450325  | Blvrb    | biliverdin reductase B (flavin reductase (NADPH))                                      | 4  | 0  | 2 |
| 119672920 | Mepce    | bin3, bicoid-interacting 3, homolog                                                    | 1  | 0  | 0 |
| 31980697  | Bloc1s1  | biogenesis of lysosome-related organelles complex-1, subunit 1                         | 1  | 0  | 0 |
| 124487265 | Bod1l    | biorientation of chromosomes in cell division 1-like                                   | 1  | 13 | 0 |
| 21624609  | Bphl     | biphenyl hydrolase-like (serine hydrolase, breast epithelial mucin-associated antigen) | 7  | 0  | 0 |
| 114326546 | Pgam1    | bisphosphoglycerate mutase 1                                                           | 18 | 1  | 9 |
| 30519997  | Blmh     | bleomycin hydrolase                                                                    | 2  | 0  | 0 |
| 7304931   | Bop1     | block of proliferation 1                                                               | 1  | 0  | 6 |
| 226693393 | Blm      | Bloom syndrome protein homolog isoform 1                                               | 1  | 0  | 0 |
| 46559391  | Bmi1     | Bmi1 polycomb ring finger oncogene                                                     | 0  | 2  | 0 |
| 18129622  | Bmp2k    | BMP2 inducible kinase                                                                  | 0  | 0  | 1 |
| 39930555  | Bms1     | BMS1-like, ribosome assembly protein                                                   | 0  | 2  | 8 |
| 164565417 | Boll     | bol, boule-like isoform 1                                                              | 0  | 1  | 0 |
| 58037151  | Bola1    | bolA-like 1                                                                            | 4  | 0  | 0 |
| 6680802   | Bmpr1b   | bone morphogenetic protein receptor, type IB                                           | 0  | 0  | 1 |
| 45598372  | Basp1    | brain abundant, membrane attached signal protein 1                                     | 5  | 7  | 5 |
| 24418919  | Pygb     | brain glycogen phosphorylase                                                           | 19 | 0  | 6 |
| 21312594  | Brp44    | brain protein 44                                                                       | 2  | 0  | 0 |
| 9055178   | Brp44l   | brain protein 44-like                                                                  | 0  | 0  | 1 |
| 92110033  | Bai1     | brain-specific angiogenesis inhibitor 1                                                | 1  | 1  | 1 |
| 262231776 | Baiap2   | brain-specific angiogenesis inhibitor 1-associated protein 2 isoform c                 | 7  | 14 | 3 |
| 314122229 | Bai2     | brain-specific angiogenesis inhibitor 2                                                | 0  | 1  | 1 |
| 33695141  | Tmem59l  | brain-specific membrane-anchored protein                                               | 1  | 0  | 0 |
| 33859514  | Bcat2    | branched chain aminotransferase 2, mitochondrial                                       | 2  | 0  | 0 |
| 40353220  | Bckdhb   | branched chain keto acid dehydrogenase E1 beta                                         | 1  | 1  | 0 |
| 6753164   | Bckdk    | branched chain ketoacid dehydrogenase kinase                                           | 1  | 2  | 0 |
| 6680768   | Bard1    | BRCA1 associated RING domain 1                                                         | 0  | 1  | 0 |
| 262050570 | Brcc3    | BRCA1/BRCA2-containing complex, subunit 3                                              | 1  | 0  | 0 |
| 161016835 | Brca1    | breast cancer 1                                                                        | 0  | 0  | 1 |
| 124487411 | Brca2    | breast cancer 2                                                                        | 0  | 0  | 1 |
| 83649717  | Brms1l   | breast cancer metastasis-suppressor 1-like                                             | 0  | 1  | 0 |
| 256985112 | Bcas1    | breast carcinoma amplified sequence 1                                                  | 1  | 0  | 0 |
| 70906453  | Bcas2    | breast carcinoma amplified sequence 2                                                  | 0  | 9  | 6 |

|           |               |                                                                        |    |    |    |
|-----------|---------------|------------------------------------------------------------------------|----|----|----|
| 58037467  | Bri3bp        | Bri3 binding protein                                                   | 2  | 1  | 3  |
| 134053947 | Bin1          | bridging integrator 1 isoform 1                                        | 1  | 0  | 0  |
| 10946638  | Bin3          | bridging integrator 3                                                  | 0  | 0  | 1  |
| 141802630 | Bxdc2         | BRIX                                                                   | 0  | 0  | 3  |
| 110347521 | Bxdc1         | brix domain containing 1 isoform 2                                     | 0  | 0  | 5  |
| 189339272 | Baz1a         | bromodomain adjacent to zinc finger domain 1A                          | 1  | 21 | 4  |
| 170295818 | Baz1b         | bromodomain adjacent to zinc finger domain, 1B                         | 0  | 17 | 25 |
| 114205435 | Baz2a         | bromodomain adjacent to zinc finger domain, 2A                         | 0  | 3  | 2  |
| 62177117  | Baz2b         | bromodomain adjacent to zinc finger domain, 2B                         | 1  | 1  | 0  |
| 157057184 | Brwd1         | bromodomain and WD repeat domain containing 1 isoform A                | 1  | 0  | 1  |
| 125490358 | Brwd3         | bromodomain and WD repeat domain containing 3                          | 1  | 0  | 0  |
| 164698417 | Brd1          | bromodomain containing 1                                               | 0  | 0  | 3  |
| 71067345  | Brd2          | bromodomain containing 2 isoform a                                     | 0  | 2  | 0  |
| 165972335 | Brd3          | bromodomain containing 3 isoform 2                                     | 0  | 7  | 0  |
| 226246640 | Brd4          | bromodomain containing 4 isoform 1                                     | 1  | 8  | 0  |
| 6755234   | Brd7          | bromodomain containing 7                                               | 0  | 5  | 1  |
| 185134208 | Brd8          | bromodomain containing 8                                               | 0  | 8  | 0  |
| 112817628 | Brd9          | bromodomain containing 9                                               | 0  | 1  | 0  |
| 140969817 | Bptf          | bromodomain PHD finger transcription factor                            | 1  | 11 | 2  |
| 123858774 | Btaf1         | BTAF1 RNA polymerase II, B-TFIIID transcription factor-associated      | 1  | 2  | 4  |
| 158534069 | Banp          | Btg3 associated nuclear protein isoform 2                              | 1  | 2  | 0  |
| 22122459  | Bud13         | BUD13 homolog                                                          | 0  | 0  | 1  |
| 31560618  | Bub3          | budding uninhibited by benzimidazoles 3 homolog                        | 2  | 10 | 0  |
| 124487350 | Bche          | butyrylcholinesterase                                                  | 1  | 0  | 0  |
| 164698440 | Bysl          | bystin-like                                                            | 1  | 1  | 2  |
| 7305107   | Grcc10        | C10 protein                                                            | 0  | 1  | 0  |
| 31542251  | C1d           | C1D nuclear receptor co-repressor                                      | 0  | 1  | 0  |
| 147903609 | C1qtnf4       | C1q and tumor necrosis factor related protein 4                        | 0  | 1  | 1  |
| 118200358 | Cadps2        | Ca2+-dependent activator for secretion protein 2                       | 1  | 0  | 1  |
| 162951870 | Abl1          | c-abl oncogene 1, receptor tyrosine kinase isoform b                   | 0  | 1  | 0  |
| 6753374   | Cdh1          | cadherin 1                                                             | 14 | 5  | 10 |
| 6680900   | Cdh16         | cadherin 16                                                            | 24 | 0  | 2  |
| 124517680 | Cdh23         | cadherin 23                                                            | 1  | 0  | 0  |
| 83715978  | Cdh3          | cadherin 3 isoform b                                                   | 0  | 0  | 1  |
| 6753376   | Cdh4          | cadherin 4                                                             | 0  | 0  | 1  |
| 70995287  | Cabin1        | calcineurin binding protein 1                                          | 0  | 2  | 1  |
| 154146233 | Calcoco2      | calcium binding and coiled-coil domain 2 b                             | 1  | 0  | 0  |
| 21450201  | Cbara1        | calcium binding atopy-related autoantigen 1                            | 3  | 3  | 2  |
| 161086893 | Cab39         | calcium binding protein 39                                             | 3  | 0  | 0  |
| 31541826  | Cab39l        | calcium binding protein 39-like                                        | 6  | 0  | 0  |
| 21746185  | Cabp4         | calcium binding protein 4                                              | 0  | 0  | 1  |
| 9790225   | 1500003O03Rik | calcium binding protein P22                                            | 4  | 1  | 1  |
| 254826788 | Cacna1h       | calcium channel alpha13.2 subunit isoform 1                            | 1  | 0  | 0  |
| 116174795 | Cacna1a       | calcium channel, alpha 1A subunit                                      | 0  | 0  | 2  |
| 161086902 | Cacna2d1      | calcium channel, voltage-dependent, alpha2/delta subunit 1 isoform e   | 0  | 1  | 0  |
| 6753236   | Cacna2d3      | calcium channel, voltage-dependent, alpha2/delta subunit 3             | 1  | 1  | 0  |
| 113930699 | Cacna1c       | calcium channel, voltage-dependent, L type, alpha 1C subunit isoform 1 | 0  | 1  | 0  |
| 134288900 | Cacna1d       | calcium channel, voltage-dependent, L type, alpha 1D subunit isoform 1 | 0  | 1  | 0  |

|           |          |                                                                        |    |    |    |
|-----------|----------|------------------------------------------------------------------------|----|----|----|
| 189409136 | Cacna1s  | calcium channel, voltage-dependent, L type, alpha 1S subunit isoform 2 | 0  | 1  | 2  |
| 110225368 | Cacna1b  | calcium channel, voltage-dependent, N type, alpha 1B subunit isoform 2 | 1  | 0  | 0  |
| 117968623 | Cacna1e  | calcium channel, voltage-dependent, R type, alpha 1E subunit           | 1  | 0  | 0  |
| 295444836 | Cacna1g  | calcium channel, voltage-dependent, T type, alpha 1G subunit isoform b | 0  | 1  | 1  |
| 20982847  | Carf     | calcium response factor                                                | 0  | 0  | 1  |
| 85362742  | Camk2g   | calcium/calmodulin-dependent protein kinase II gamma isoform 2         | 2  | 1  | 0  |
| 70906479  | Camk2d   | calcium/calmodulin-dependent protein kinase II, delta isoform 3        | 3  | 6  | 0  |
| 21703722  | Camkk2   | calcium/calmodulin-dependent protein kinase kinase 2, beta             | 0  | 1  | 1  |
| 133504495 | Cask     | calcium/calmodulin-dependent serine protein kinase                     | 1  | 0  | 1  |
| 27369998  | Slc25a24 | calcium-binding transporter                                            | 16 | 0  | 1  |
| 13385290  | Carhsp1  | calcium-regulated heat-stable protein (24kD)                           | 1  | 0  | 0  |
| 33468885  | Cacybp   | calcyclin binding protein                                              | 3  | 0  | 0  |
| 298676543 | Caly     | calcyon protein                                                        | 0  | 0  | 1  |
| 110835711 | Capsl    | calcyphosine-like                                                      | 0  | 1  | 0  |
| 21704156  | Cald1    | caldesmon 1                                                            | 1  | 5  | 0  |
| 100816903 | Clmn     | calmin isoform a                                                       | 0  | 2  | 17 |
| 6680834   | Calm3    | calmodulin 3                                                           | 3  | 6  | 8  |
| 56785418  | Calm5    | calmodulin 5                                                           | 0  | 1  | 0  |
| 30017453  | Camta2   | calmodulin binding transcription activator 2                           | 0  | 0  | 1  |
| 124486889 | Camsap11 | calmodulin regulated spectrin-associated protein 1-like 1              | 1  | 1  | 2  |
| 156447039 | Calml4   | calmodulin-like 4 isoform a                                            | 1  | 0  | 0  |
| 160333216 | Canx     | calnexin                                                               | 29 | 1  | 8  |
| 160333229 | Capn1    | calpain 1, large subunit                                               | 21 | 0  | 1  |
| 62000644  | Capn11   | calpain 11                                                             | 0  | 0  | 1  |
| 85701961  | Capn13   | calpain 13                                                             | 0  | 0  | 1  |
| 157951598 | Capn2    | calpain 2                                                              | 3  | 0  | 2  |
| 6680846   | Capn5    | calpain 5                                                              | 0  | 0  | 8  |
| 251823797 | Capn9    | calpain 9                                                              | 0  | 1  | 1  |
| 110227381 | Capns1   | calpain, small subunit 1                                               | 7  | 0  | 1  |
| 33563246  | Cast     | calpastatin                                                            | 5  | 5  | 0  |
| 6680952   | Cnn2     | calponin 2                                                             | 1  | 0  | 0  |
| 21312564  | Cnn3     | calponin 3, acidic                                                     | 2  | 0  | 6  |
| 6680836   | Calr     | calreticulin                                                           | 22 | 0  | 2  |
| 227430322 | Casq1    | calsequestrin 1                                                        | 0  | 1  | 0  |
| 41282022  | Calu     | calumenin isoform 2                                                    | 11 | 0  | 0  |
| 158966707 | Creb1    | cAMP responsive element binding protein 1 isoform A                    | 0  | 1  | 0  |
| 282721112 | Casc1    | cancer susceptibility candidate 1                                      | 0  | 1  | 0  |
| 125628638 | Casc5    | cancer susceptibility candidate 5                                      | 1  | 0  | 0  |
| 9903607   | Cnpy2    | canopy 2 homolog                                                       | 9  | 0  | 0  |
| 21312510  | Cnpy3    | canopy 3 homolog                                                       | 2  | 0  | 0  |
| 30519939  | Cnpy4    | canopy 4 homolog                                                       | 5  | 1  | 0  |
| 157951604 | Cap1     | CAP, adenylate cyclase-associated protein 1                            | 12 | 0  | 2  |
| 158631217 | Cic      | capicua homolog isoform a                                              | 0  | 0  | 1  |
| 6671672   | Capza2   | capping protein (actin filament) muscle Z-line, alpha 2                | 4  | 8  | 10 |
| 6753262   | Capzb    | capping protein (actin filament) muscle Z-line, beta isoform b         | 8  | 12 | 11 |
| 124248512 | Cps1     | carbamoyl-phosphate synthetase 1                                       | 0  | 1  | 0  |

|           |          |                                                                                  |    |    |    |
|-----------|----------|----------------------------------------------------------------------------------|----|----|----|
| 51093867  | Cad      | carbamoyl-phosphate synthetase 2, aspartate transcarbamylase, and dihydroorotase | 1  | 0  | 0  |
| 12963845  | Chst1    | carbohydrate (keratan sulfate Gal-6) sulfotransferase 1                          | 0  | 1  | 0  |
| 298676450 | Carkd    | carbohydrate kinase domain containing                                            | 2  | 0  | 0  |
| 157951596 | Car2     | carbonic anhydrase II                                                            | 10 | 0  | 2  |
| 211057396 | Car5b    | carbonic anhydrase VB, mitochondrial                                             | 3  | 0  | 0  |
| 269784762 | Cbr4     | carbonic reductase 4                                                             | 2  | 9  | 2  |
| 113680352 | Cbr1     | carbonyl reductase 1                                                             | 2  | 0  | 0  |
| 6671688   | Cbr2     | carbonyl reductase 2                                                             | 16 | 2  | 10 |
| 27413160  | Cbr3     | carbonyl reductase 3                                                             | 4  | 0  | 1  |
| 158635992 | Pdlim1   | carboxyl terminal LIM domain protein 1                                           | 10 | 0  | 0  |
| 117553604 | Ces3     | carboxylesterase 3                                                               | 3  | 0  | 0  |
| 120300909 | Agbl3    | carboxypeptidase 3, cytosolic                                                    | 0  | 0  | 1  |
| 150378501 | Cpd      | carboxypeptidase D                                                               | 2  | 0  | 0  |
| 189458849 | Cpm      | carboxypeptidase M                                                               | 1  | 0  | 6  |
| 228008326 | Cpxm1    | carboxypeptidase X 1 (M14 family)                                                | 1  | 0  | 1  |
| 229092758 | Cpxm2    | carboxypeptidase X 2 (M14 family)                                                | 1  | 1  | 0  |
| 244790191 | Ceacam12 | carcinoembryonic antigen-related cell adhesion molecule 12 isoform 1             | 1  | 0  | 1  |
| 15638942  | lft81    | carnitine deficiency-associated gene expressed in ventricle 1                    | 0  | 0  | 1  |
| 17157983  | Crot     | carnitine O-octanoyltransferase                                                  | 10 | 0  | 1  |
| 162138915 | Cpt2     | carnitine O-palmitoyltransferase                                                 | 12 | 0  | 1  |
| 162287142 | Cpt1a    | carnitine palmitoyltransferase 1A liver                                          | 17 | 6  | 10 |
| 162287165 | Cpt1b    | carnitine palmitoyltransferase 1B                                                | 2  | 0  | 0  |
| 10048462  | Slc25a20 | carnitine/acylcarnitine translocase                                              | 6  | 0  | 2  |
| 110626040 | Crtac1   | cartilage acidic protein 1                                                       | 0  | 1  | 0  |
| 31542425  | Csnk1e   | casein kinase 1 epsilon                                                          | 0  | 1  | 0  |
| 22165382  | Csnk1a1  | casein kinase 1, alpha 1                                                         | 1  | 11 | 7  |
| 20544149  | Csnk1d   | casein kinase 1, delta isoform 2                                                 | 0  | 1  | 1  |
| 113462019 | Csnk1g3  | casein kinase 1, gamma 3                                                         | 0  | 1  | 0  |
| 31542427  | Csnk2a1  | casein kinase 2, alpha 1 polypeptide                                             | 8  | 9  | 0  |
| 6753540   | Csnk2a2  | casein kinase 2, alpha prime polypeptide                                         | 1  | 6  | 0  |
| 7106277   | Csnk2b   | casein kinase 2, beta polypeptide                                                | 5  | 4  | 0  |
| 8393156   | Clpp     | caseinolytic peptidase, ATP-dependent, proteolytic subunit                       | 7  | 0  | 0  |
| 80978932  | Cbl      | Casitas B-lineage lymphoma                                                       | 0  | 1  | 0  |
| 161168996 | Caskin1  | CASK interacting protein 1                                                       | 0  | 0  | 1  |
| 86198303  | Cflar    | CASP8 and FADD-like apoptosis regulator isoform 2                                | 1  | 0  | 0  |
| 6753284   | Casp3    | caspase 3                                                                        | 1  | 0  | 0  |
| 6680850   | Casp7    | caspase 7                                                                        | 2  | 0  | 0  |
| 122056578 | Casp8    | caspase 8                                                                        | 2  | 0  | 0  |
| 172072595 | Casp8ap2 | caspase 8 associated protein 2                                                   | 0  | 0  | 1  |
| 161086929 | Card11   | caspase recruitment domain family, member 11                                     | 0  | 0  | 1  |
| 18700028  | Card14   | caspase recruitment domain family, member 14                                     | 1  | 0  | 0  |
| 147904864 | Card9    | caspase recruitment domain family, member 9                                      | 0  | 0  | 1  |
| 226823370 | Cas21    | castor homolog 1, zinc finger isoform 2                                          | 0  | 1  | 0  |
| 21450187  | Cecr5    | cat eye syndrome chromosome region, candidate 5 homolog precursor                | 1  | 0  | 0  |
| 157951741 | Cat      | catalase                                                                         | 14 | 0  | 1  |
| 42475974  | Pik3c3   | catalytic phosphatidylinositol 3-kinase 3                                        | 0  | 1  | 0  |
| 161484638 | Comt1    | catechol-O-methyltransferase                                                     | 11 | 0  | 1  |
| 33468999  | Comtd1   | catechol-O-methyltransferase domain containing 1                                 | 1  | 0  | 3  |
| 157951729 | Ctnna2   | catenin (cadherin associated protein), alpha 2 isoform 2                         | 0  | 1  | 2  |
| 227330565 | Ctnnal1  | catenin (cadherin associated protein), alpha-like 1                              | 2  | 4  | 0  |

|           |            |                                                       |    |    |    |
|-----------|------------|-------------------------------------------------------|----|----|----|
| 260166642 | Ctnnb1     | catenin (cadherin associated protein), beta 1, 88kDa  | 7  | 6  | 25 |
| 6753294   | Ctnna1     | catenin alpha 1                                       | 37 | 23 | 43 |
| 254540032 | Ctnnb1     | catenin, beta like 1                                  | 7  | 19 | 1  |
| 146231979 | Ctnnd1     | catenin, delta 1 isoform 1                            | 14 | 7  | 26 |
| 84042525  | Ctsa       | cathepsin A isoform a                                 | 9  | 0  | 0  |
| 6681079   | Ctsb       | cathepsin B preproprotein                             | 12 | 1  | 1  |
| 160707990 | Ctsc       | cathepsin C preproprotein                             | 6  | 1  | 0  |
| 6753556   | Ctsd       | cathepsin D                                           | 19 | 1  | 0  |
| 166235890 | Ctsh       | cathepsin H preproprotein                             | 6  | 0  | 0  |
| 29244082  | Ctso       | cathepsin O                                           | 0  | 0  | 1  |
| 11968166  | Ctsz       | cathepsin Z preproprotein                             | 3  | 0  | 0  |
| 261823948 | AU018091   | cationic amino acid transporter 5                     | 0  | 0  | 1  |
| 6680854   | Cav1       | caveolin 1, caveolae protein                          | 1  | 2  | 3  |
| 18702317  | Cav2       | caveolin 2                                            | 4  | 1  | 3  |
| 254692991 | Exosc8     | CBP-interacting protein 3 isoform 2                   | 0  | 8  | 1  |
| 6753404   | Cebpb      | CCAAT/enhancer binding protein beta                   | 0  | 1  | 1  |
| 61966683  | Cebpg      | CCAAT/enhancer binding protein gamma                  | 0  | 1  | 0  |
| 67188876  | Cebpz      | CCAAT/enhancer binding protein zeta                   | 0  | 5  | 4  |
| 31044459  | Ctcf       | CCCTC-binding factor                                  | 0  | 24 | 4  |
| 327315392 | Cnot1      | CCR4-NOT transcription complex, subunit 1 isoform 2   | 1  | 1  | 0  |
| 22122717  | Cnot3      | CCR4-NOT transcription complex, subunit 3             | 1  | 0  | 0  |
| 19526794  | Cd81       | CD 81 antigen                                         | 1  | 0  | 0  |
| 161353456 | Cd151      | CD151 antigen                                         | 1  | 0  | 0  |
| 17505208  | Cd2bp2     | CD2 antigen (cytoplasmic tail) binding protein 2      | 0  | 0  | 1  |
| 125987599 | Cd2ap      | CD2-associated protein                                | 9  | 14 | 0  |
| 80978941  | Cd300lb    | CD300 antigen like family member B                    | 1  | 0  | 0  |
| 227116353 | Cd36       | CD36 antigen                                          | 0  | 0  | 1  |
| 22003860  | Cd3eap     | CD3E antigen, epsilon polypeptide associated protein  | 0  | 1  | 0  |
| 6754382   | Cd47       | CD47 antigen                                          | 2  | 0  | 0  |
| 160358823 | Cd5l       | CD5 antigen-like precursor                            | 0  | 1  | 0  |
| 110431344 | Cd63       | CD63 antigen                                          | 1  | 0  | 0  |
| 160333109 | Cd72       | CD72 antigen isoform 3                                | 1  | 0  | 0  |
| 112983684 | Cd80       | CD80 antigen precursor                                | 1  | 0  | 0  |
| 209862915 | Cd82       | CD82 antigen isoform 1                                | 2  | 0  | 0  |
| 6680894   | Cd9        | CD9 antigen                                           | 3  | 0  | 0  |
| 68448515  | Cdc16      | CDC16 cell division cycle 16 homolog                  | 0  | 3  | 0  |
| 30387632  | Cdc23      | CDC23 (cell division cycle 23, yeast, homolog)        | 0  | 2  | 0  |
| 157816961 | Crks       | Cdc2-related kinase, arginine/serine-rich isoform 3   | 1  | 1  | 0  |
| 283135190 | Cdc42bbp   | CDC42 binding protein kinase beta                     | 2  | 15 | 1  |
| 84781706  | Cdc42se1   | CDC42 small effector 1 isoform 1                      | 1  | 0  | 0  |
| 111038135 | Clk1       | CDC-like kinase 1 isoform 2                           | 0  | 0  | 1  |
| 254540152 | Clk2       | CDC-like kinase 2 isoform 1                           | 0  | 0  | 1  |
| 83745112  | Clk3       | CDC-like kinase 3                                     | 0  | 1  | 0  |
| 19527228  | Cisd1      | CDGSH iron sulfur domain 1                            | 5  | 0  | 4  |
| 21728370  | Cisd2      | CDGSH iron sulfur domain 2                            | 4  | 0  | 0  |
| 49355794  | Cdk2ap1    | CDK2 (cyclin-dependent kinase 2)-associated protein 1 | 0  | 1  | 0  |
| 50657347  | Cdk5rap2   | CDK5 regulatory subunit associated protein 2          | 0  | 0  | 1  |
| 13384788  | Cdk5rap3   | CDK5 regulatory subunit associated protein 3          | 2  | 0  | 0  |
| 19882247  | Ciz1       | CDKN1A interacting zinc finger protein 1              | 0  | 1  | 0  |
| 27369527  | Cdkn2aip   | CDKN2A interacting protein                            | 2  | 5  | 1  |
| 21313402  | Cdkn2aipnl | CDKN2A interacting protein N-terminal like            | 0  | 1  | 0  |
| 134947988 | AK220484   | cDNA sequence AK220484                                | 0  | 1  | 0  |
| 167234439 | Fam20c     | cDNA sequence BC004044                                | 2  | 0  | 0  |
| 21450083  | Rprd1a     | cDNA sequence BC021395                                | 0  | 1  | 0  |

|           |          |                                                                                          |    |    |    |
|-----------|----------|------------------------------------------------------------------------------------------|----|----|----|
| 31712002  | Edc4     | cDNA sequence BC022641                                                                   | 1  | 1  | 6  |
| 31981980  | Ints9    | cDNA sequence BC028953                                                                   | 0  | 8  | 2  |
| 41235733  | Lymr4    | cDNA sequence BC034664                                                                   | 6  | 1  | 0  |
| 28076897  | Cdpt     | CDP-diacylglycerol-inositol 3-phosphatidyltransferase isoform 2                          | 5  | 1  | 1  |
| 189409173 | Ceacam15 | CEA-related cell adhesion molecule 15                                                    | 0  | 1  | 0  |
| 166998947 | Ccpg1    | cell cycle progression 1 isoform 2                                                       | 0  | 0  | 2  |
| 329299065 | Sept7    | cell division cycle 10 homolog                                                           | 2  | 15 | 0  |
| 31542366  | Cdc2a    | cell division cycle 2                                                                    | 0  | 1  | 0  |
| 92373436  | Cdc25a   | cell division cycle 25A                                                                  | 0  | 0  | 1  |
| 161621261 | Cdc25b   | cell division cycle 25B isoform a                                                        | 0  | 0  | 1  |
| 189409171 | Cdc215   | cell division cycle 2-like 5 (cholinesterase-related cell division controller) isoform 1 | 0  | 1  | 0  |
| 7949018   | Cdc37    | cell division cycle 37 homolog                                                           | 3  | 0  | 0  |
| 198278501 | Cdc40    | cell division cycle 40 homolog                                                           | 0  | 0  | 4  |
| 6753364   | Cdc42    | cell division cycle 42                                                                   | 8  | 7  | 6  |
| 22779899  | Cdc5l    | cell division cycle 5-like                                                               | 0  | 17 | 10 |
| 126032303 | Cdc7     | cell division cycle 7                                                                    | 1  | 0  | 0  |
| 52630436  | Pigu     | cell division cycle 91-like 1                                                            | 2  | 0  | 0  |
| 33563288  | Ccar1    | cell division cycle and apoptosis regulator 1                                            | 2  | 22 | 0  |
| 7305111   | Cdca3    | cell division cycle associated 3                                                         | 0  | 1  | 0  |
| 21313220  | Cdca7    | cell division cycle associated 7                                                         | 0  | 0  | 2  |
| 38372905  | Rab8a    | cell line NK14 derived transforming oncogene                                             | 3  | 2  | 2  |
| 157909784 | Cnbp     | cellular nucleic acid binding protein isoform 3                                          | 4  | 4  | 1  |
| 7304975   | Crabp1   | cellular retinoic acid binding protein I                                                 | 1  | 0  | 0  |
| 33469075  | Crabp2   | cellular retinoic acid binding protein II                                                | 6  | 0  | 1  |
| 87299624  | Cntln    | centlein isoform 1                                                                       | 0  | 1  | 1  |
| 10257421  | Cetn2    | centrin 2                                                                                | 0  | 3  | 0  |
| 6680922   | Cetn3    | centrin 3                                                                                | 0  | 1  | 1  |
| 115648101 | Cenpe    | centromere protein E                                                                     | 1  | 0  | 0  |
| 189458891 | Cenpf    | centromere protein F                                                                     | 0  | 1  | 1  |
| 225543405 | Cenpj    | centromere protein J                                                                     | 1  | 0  | 1  |
| 29789150  | Cenpp    | centromere protein P                                                                     | 0  | 1  | 0  |
| 225703070 | Cenpv    | centromere protein V                                                                     | 0  | 0  | 2  |
| 22165349  | Zw10     | centromere/kinetochore protein zw10                                                      | 1  | 0  | 0  |
| 323462178 | Cep110   | centrosomal protein 110                                                                  | 0  | 1  | 0  |
| 124487356 | Cep152   | centrosomal protein 152                                                                  | 0  | 1  | 0  |
| 157278527 | Cep170   | centrosomal protein 170                                                                  | 0  | 1  | 0  |
| 256355032 | Cep55    | centrosomal protein 55                                                                   | 1  | 1  | 0  |
| 124486733 | Cep76    | centrosomal protein 76                                                                   | 1  | 0  | 0  |
| 124301210 | Csp1     | centrosome and spindle pole associated protein 1                                         | 1  | 0  | 1  |
| 6753410   | Cer1     | cerberus 1                                                                               | 0  | 0  | 1  |
| 30520001  | Cggbp1   | CGG triplet repeat binding protein 1                                                     | 0  | 10 | 0  |
| 194097451 | Catsper4 | channel, sperm associated 4 isoform 1                                                    | 1  | 0  | 0  |
| 6753320   | Cct3     | chaperonin containing Tcp1, subunit 3 (gamma)                                            | 19 | 6  | 6  |
| 6753322   | Cct4     | chaperonin containing Tcp1, subunit 4 (delta)                                            | 15 | 8  | 2  |
| 6671702   | Cct5     | chaperonin containing Tcp1, subunit 5 (epsilon)                                          | 16 | 6  | 4  |
| 6753324   | Cct6a    | chaperonin containing Tcp1, subunit 6a                                                   | 14 | 10 | 6  |
| 226693361 | Cct6b    | chaperonin containing Tcp1, subunit 6b (zeta)                                            | 4  | 1  | 0  |
| 238814391 | Cct7     | chaperonin containing Tcp1, subunit 7 (eta)                                              | 17 | 6  | 3  |
| 126521835 | Cct2     | chaperonin subunit 2 (beta)                                                              | 28 | 8  | 4  |
| 126723461 | Cct8     | chaperonin subunit 8 (theta)                                                             | 27 | 20 | 1  |
| 118136297 | Dlg2     | chapsyn-110                                                                              | 0  | 0  | 1  |
| 31542385  | Chek1    | checkpoint kinase 1                                                                      | 1  | 0  | 0  |

|           |         |                                                       |    |    |    |
|-----------|---------|-------------------------------------------------------|----|----|----|
| 51093870  | Foxn3   | checkpoint suppressor 1                               | 0  | 1  | 0  |
| 188497681 | Chfr    | checkpoint with forkhead and ring finger domains      | 1  | 0  | 0  |
| 157012007 | Ccr1    | chemokine (C-C motif) receptor 1                      | 1  | 0  | 0  |
| 116268121 | Ccr7    | chemokine (C-C motif) receptor 7                      | 0  | 0  | 1  |
| 31982017  | Cx3cl1  | chemokine (C-X3-C motif) ligand 1                     | 0  | 0  | 1  |
| 262205438 | Chn1    | chimerin (chimaerin) 1 isoform 3                      | 0  | 0  | 1  |
| 218083710 | Chid1   | chitinase domain containing 1 isoform 2               | 0  | 6  | 0  |
| 6753434   | Clcn6   | chloride channel 6                                    | 1  | 1  | 0  |
| 6753436   | Clcn7   | chloride channel 7                                    | 0  | 0  | 1  |
| 295293090 | Clcc1   | chloride channel CLIC-like 1                          | 3  | 0  | 1  |
| 226423869 | Clcnka  | chloride channel K1                                   | 0  | 1  | 1  |
| 15617203  | Clic1   | chloride intracellular channel 1                      | 11 | 1  | 8  |
| 7304963   | Clic4   | chloride intracellular channel 4 (mitochondrial)      | 1  | 3  | 0  |
| 27369633  | Clic6   | chloride intracellular channel 6                      | 0  | 0  | 1  |
| 21359827  | Chmp7   | CHMP family, member 7                                 | 1  | 0  | 0  |
| 210031293 | Chdh    | choline dehydrogenase                                 | 15 | 1  | 1  |
| 253683458 | Pcyt1a  | choline phosphate cytidyltransferase 1 alpha          | 1  | 0  | 1  |
| 46877071  | Pcyt1b  | choline phosphate cytidyltransferase 1 beta isoform 1 | 1  | 0  | 0  |
| 226442811 | Chpt1   | choline phosphotransferase 1 isoform 2                | 1  | 0  | 0  |
| 12963733  | Slc44a4 | choline transporter-like protein 4                    | 0  | 0  | 1  |
| 31559983  | Cept1   | choline/ethanolaminephosphotransferase 1              | 3  | 0  | 2  |
| 282721106 | Chrm2   | cholinergic receptor, muscarinic 2, cardiac           | 1  | 0  | 0  |
| 124487261 | Chrna10 | cholinergic receptor, nicotinic, alpha polypeptide 10 | 0  | 1  | 1  |
| 36031035  | Smc3    | chondroitin sulfate proteoglycan 6                    | 3  | 49 | 31 |
| 6753418   | Chrd    | chordin                                               | 0  | 1  | 0  |
| 167466239 | Chrdl1  | chordin-like 1 1                                      | 1  | 0  | 0  |
| 328927033 | Prl3d1  | chorionic somatomammotropin hormone 1                 | 0  | 1  | 0  |
| 110681714 | Chm     | choroideremia                                         | 0  | 0  | 1  |
| 67782360  | Esyt2   | chr2 synaptotagmin                                    | 12 | 0  | 0  |
| 18860511  | Chrac1  | chromatin accessibility complex 1                     | 0  | 3  | 1  |
| 21312470  | Chaf1b  | chromatin assembly factor 1 subunit B                 | 0  | 3  | 0  |
| 7304957   | Chaf1a  | chromatin assembly factor 1, subunit A (p150)         | 0  | 11 | 1  |
| 31982546  | Cdt1    | chromatin licensing and DNA replication factor 1      | 1  | 0  | 0  |
| 21704220  | Chmp1a  | chromatin modifying protein 1A                        | 1  | 0  | 1  |
| 13195618  | Chmp1b  | chromatin modifying protein 1B                        | 0  | 1  | 0  |
| 21312151  | Chmp2a  | chromatin modifying protein 2A                        | 0  | 1  | 0  |
| 28077049  | Chmp4b  | chromatin modifying protein 4B                        | 1  | 1  | 3  |
| 147904547 | Chmp6   | chromatin modifying protein 6                         | 1  | 0  | 0  |
| 21450179  | Cbx7    | chromobox 7                                           | 0  | 1  | 0  |
| 6671696   | Cbx1    | chromobox homolog 1                                   | 1  | 6  | 6  |
| 108860695 | Cbx3    | chromobox homolog 3                                   | 2  | 7  | 7  |
| 158966694 | Cbx5    | chromobox homolog 5                                   | 0  | 8  | 10 |
| 61657984  | Cbx6    | chromobox homolog 6                                   | 1  | 1  | 1  |
| 7304947   | Cbx8    | chromobox homolog 8                                   | 0  | 3  | 0  |
| 239985588 | Chd1    | chromodomain helicase DNA binding protein 1           | 0  | 0  | 3  |
| 189458810 | Chd2    | chromodomain helicase DNA binding protein 2           | 0  | 2  | 2  |
| 124358950 | Chd3    | chromodomain helicase DNA binding protein 3           | 2  | 10 | 0  |
| 39204553  | Chd4    | chromodomain helicase DNA binding protein 4           | 0  | 54 | 23 |
| 124487025 | Chd5    | chromodomain helicase DNA binding protein 5 isoform 2 | 1  | 28 | 11 |
| 61742812  | Chd6    | chromodomain helicase DNA binding protein 6           | 0  | 1  | 0  |
| 12963737  | Cse1l   | chromosome segregation 1-like                         | 19 | 0  | 9  |
| 84000434  | Chtf8   | chromosome transmission fidelity factor 8             | 0  | 0  | 1  |
| 225543193 | Crocc   | ciliary rootlet coiled-coil isoform 1                 | 1  | 6  | 4  |
| 189458807 | Cgn     | cingulin                                              | 1  | 5  | 22 |

|           |               |                                                                           |    |    |    |
|-----------|---------------|---------------------------------------------------------------------------|----|----|----|
| 56550079  | Cgnl1         | cingulin-like 1                                                           | 0  | 0  | 1  |
| 163954951 | Cirh1a        | cirhin                                                                    | 0  | 0  | 8  |
| 23956166  | 3300001P08Rik | cisplatin resistance-associated overexpressed protein                     | 1  | 7  | 2  |
| 256220113 | Clybl         | citrate lyase beta like                                                   | 1  | 0  | 0  |
| 13385942  | Cs            | citrate synthase                                                          | 12 | 8  | 2  |
| 269973935 | Csl           | citrate synthase-like protein                                             | 8  | 5  | 2  |
| 27312023  | Cmtm4         | CKLF-like MARVEL transmembrane domain containing 4                        | 1  | 0  | 0  |
| 266458391 | Kras          | c-K-ras2 protein                                                          | 2  | 3  | 3  |
| 225543339 | Clspn         | claspin                                                                   | 1  | 0  | 0  |
| 31982511  | Adh5          | class III alcohol dehydrogenase, chi subunit                              | 6  | 0  | 0  |
| 31560625  | Adh7          | class IV alcohol dehydrogenase, mu or sigma subunit                       | 6  | 0  | 0  |
| 154240730 | Clint1        | clathrin interactor 1                                                     | 14 | 0  | 3  |
| 51491845  | Cltc          | clathrin, heavy polypeptide (Hc)                                          | 68 | 53 | 66 |
| 30794164  | Cltb          | clathrin, light polypeptide (Lcb)                                         | 2  | 1  | 4  |
| 122939198 | Clta          | clathrin, light polypeptide A isoform a                                   | 2  | 2  | 4  |
| 6753438   | Cldn3         | claudin 3                                                                 | 3  | 0  | 4  |
| 6753440   | Cldn4         | claudin 4                                                                 | 0  | 0  | 3  |
| 9055190   | Cldn6         | claudin 6                                                                 | 0  | 0  | 1  |
| 302318906 | Cldn7         | claudin 7                                                                 | 1  | 0  | 1  |
| 9055192   | Cldn8         | claudin 8                                                                 | 2  | 0  | 3  |
| 61098102  | Cldn9         | claudin 9                                                                 | 1  | 0  | 1  |
| 16751835  | Cpsf1         | cleavage and polyadenylation specific factor 1                            | 0  | 32 | 5  |
| 8393762   | Cpsf2         | cleavage and polyadenylation specific factor 2                            | 0  | 20 | 4  |
| 21312614  | Cpsf3l        | cleavage and polyadenylation specific factor 3-like                       | 0  | 7  | 0  |
| 30466247  | Cpsf4         | cleavage and polyadenylation specific factor 4                            | 0  | 1  | 0  |
| 62909983  | Cpsf6         | cleavage and polyadenylation specific factor 6                            | 4  | 11 | 1  |
| 31980904  | Cpsf3         | cleavage and polyadenylation specificity factor 3                         | 0  | 9  | 1  |
| 82617610  | Cstf3         | cleavage stimulation factor subunit 3 isoform 1                           | 0  | 20 | 4  |
| 18875338  | Cstf2         | cleavage stimulation factor, &apos; pre-RNA subunit 2                     | 0  | 3  | 1  |
| 148277061 | Cstf2t        | cleavage stimulation factor, &apos; pre-RNA subunit 2, tau                | 0  | 4  | 1  |
| 13195628  | Cstf1         | cleavage stimulation factor, &apos; pre-RNA, subunit 1                    | 0  | 13 | 1  |
| 103472025 | Clptm1        | cleft lip and palate associated transmembrane protein 1                   | 4  | 0  | 1  |
| 163644249 | Clasp1        | CLIP-associating protein 1 isoform 1                                      | 0  | 0  | 1  |
| 84871978  | Mycbp         | c-myc binding protein                                                     | 3  | 4  | 0  |
| 31981273  | Cndp2         | CNDP dipeptidase 2                                                        | 20 | 0  | 1  |
| 170172540 | F3            | coagulation factor III                                                    | 4  | 0  | 0  |
| 238624184 | F8            | coagulation factor VIII isoform 1                                         | 1  | 0  | 0  |
| 334724425 | F10           | coagulation factor X                                                      | 1  | 0  | 0  |
| 226823359 | Copa          | coatamer protein complex subunit alpha                                    | 16 | 1  | 1  |
| 15426055  | Copb1         | coatamer protein complex, subunit beta 1                                  | 17 | 0  | 4  |
| 29789080  | Copb2         | coatamer protein complex, subunit beta 2 (beta prime)                     | 7  | 0  | 3  |
| 8567340   | Copg2         | coatamer protein complex, subunit gamma 2                                 | 6  | 0  | 3  |
| 47059163  | Copg          | coatamer protein complex, subunit gamma isoform 1                         | 13 | 0  | 7  |
| 9789913   | Copz1         | coatamer protein complex, subunit zeta 1                                  | 3  | 2  | 0  |
| 9845242   | Copz2         | coatamer protein complex, subunit zeta 2                                  | 1  | 0  | 0  |
| 189458847 | Cobl1         | Cobl-like 1 isoform 1                                                     | 7  | 10 | 0  |
| 27229125  | Coasy         | Coenzyme A synthase                                                       | 7  | 0  | 0  |
| 13385992  | Coq5          | coenzyme Q5 homolog, methyltransferase                                    | 0  | 1  | 1  |
| 283135186 | Coq6          | coenzyme Q6 homolog                                                       | 0  | 0  | 2  |
| 33859690  | Coq9          | coenzyme Q9 homolog                                                       | 1  | 0  | 0  |
| 165377251 | Cobra1        | cofactor of BRCA1                                                         | 2  | 2  | 2  |
| 115270977 | Med14         | cofactor required for Sp1 transcriptional activation, subunit 2 isoform b | 0  | 1  | 0  |



|           |          |                                                         |    |    |    |
|-----------|----------|---------------------------------------------------------|----|----|----|
| 6680924   | Cfl1     | cofilin 1, non-muscle                                   | 11 | 12 | 7  |
| 6671746   | Cfl2     | cofilin 2, muscle                                       | 1  | 6  | 0  |
| 63025208  | Ccdc88a  | coiled coil domain containing 88A                       | 0  | 1  | 1  |
| 228008310 | Ccdc101  | coiled-coil domain containing 101                       | 0  | 5  | 0  |
| 168823441 | Ccdc109a | coiled-coil domain containing 109A                      | 8  | 1  | 9  |
| 261862311 | Ccdc11   | coiled-coil domain containing 11                        | 0  | 0  | 1  |
| 27370404  | Ccdc113  | coiled-coil domain containing 113                       | 2  | 0  | 0  |
| 85701754  | Ccdc114  | coiled-coil domain containing 114                       | 1  | 0  | 1  |
| 227496903 | Ccdc12   | coiled-coil domain containing 12                        | 0  | 0  | 1  |
| 47059143  | Ccdc124  | coiled-coil domain containing 124                       | 0  | 2  | 0  |
| 270288750 | Ccdc125  | coiled-coil domain containing 125                       | 0  | 1  | 0  |
| 281183278 | Ccdc127  | coiled-coil domain containing 127                       | 0  | 0  | 2  |
| 126158913 | Ccdc129  | coiled-coil domain containing 129                       | 1  | 0  | 0  |
| 268370059 | Ccdc132  | coiled-coil domain containing 132                       | 0  | 1  | 1  |
| 169646270 | Ccdc14   | coiled-coil domain containing 14                        | 1  | 0  | 1  |
| 124486907 | Ccdc142  | coiled-coil domain containing 142                       | 1  | 0  | 0  |
| 229577139 | Ccdc150  | coiled-coil domain containing 150                       | 0  | 0  | 1  |
| 151101194 | lft74    | coiled-coil domain containing 2                         | 0  | 1  | 0  |
| 133922578 | Ccdc22   | coiled-coil domain containing 22                        | 1  | 0  | 0  |
| 22164768  | Ccdc25   | coiled-coil domain containing 25                        | 2  | 0  | 1  |
| 85701967  | Ccdc27   | coiled-coil domain containing 27                        | 1  | 0  | 0  |
| 206597551 | Ccdc36   | coiled-coil domain containing 36                        | 0  | 1  | 0  |
| 254939666 | Ccdc37   | coiled-coil domain containing 37 isoform 1              | 0  | 1  | 0  |
| 31541988  | Ccdc38   | coiled-coil domain containing 38                        | 0  | 0  | 1  |
| 27229249  | Ccdc41   | coiled-coil domain containing 41                        | 0  | 0  | 1  |
| 39930435  | Ccdc44   | coiled-coil domain containing 44                        | 1  | 0  | 0  |
| 125628650 | Ccdc47   | coiled-coil domain containing 47                        | 11 | 0  | 1  |
| 262072988 | Ccdc49   | coiled-coil domain containing 49                        | 0  | 1  | 0  |
| 258679490 | Ccdc51   | coiled-coil domain containing 51                        | 2  | 0  | 0  |
| 59858549  | Ccdc55   | coiled-coil domain containing 55                        | 1  | 0  | 0  |
| 21311867  | Ccdc56   | coiled-coil domain containing 56                        | 2  | 0  | 0  |
| 58037237  | Ccdc57   | coiled-coil domain containing 57                        | 0  | 1  | 1  |
| 226874940 | Ccdc58   | coiled-coil domain containing 58 isoform 1              | 3  | 0  | 0  |
| 162135971 | Ccdc6    | coiled-coil domain containing 6                         | 1  | 0  | 0  |
| 23943818  | Ccdc65   | coiled-coil domain containing 65                        | 1  | 0  | 0  |
| 115270981 | Ccdc69   | coiled-coil domain containing 69                        | 0  | 0  | 1  |
| 194473718 | Ccdc75   | coiled-coil domain containing 75                        | 1  | 0  | 0  |
| 165905619 | Ccdc86   | coiled-coil domain containing 86                        | 0  | 1  | 2  |
| 124486839 | Ccdc88b  | coiled-coil domain containing 88B                       | 0  | 0  | 1  |
| 68448542  | Ccdc93   | coiled-coil domain containing 93 isoform c              | 3  | 0  | 0  |
| 13384734  | Chchd1   | coiled-coil-helix-coiled-coil-helix domain containing 1 | 1  | 0  | 0  |
| 21313618  | Chchd3   | coiled-coil-helix-coiled-coil-helix domain containing 3 | 6  | 0  | 11 |
| 19527144  | Chchd4   | coiled-coil-helix-coiled-coil-helix domain containing 4 | 1  | 1  | 0  |
| 28076873  | Chchd5   | coiled-coil-helix-coiled-coil-helix domain containing 5 | 1  | 0  | 0  |
| 267844806 | Chchd6   | coiled-coil-helix-coiled-coil-helix domain containing 6 | 5  | 0  | 6  |
| 298358883 | Chchd7   | coiled-coil-helix-coiled-coil-helix domain containing 7 | 0  | 1  | 0  |
| 6680946   | Cirbp    | cold inducible RNA binding protein                      | 3  | 7  | 2  |
| 240255574 | Csde1    | cold shock domain containing E1, RNA binding isoform 1  | 1  | 10 | 0  |
| 47059495  | Csda     | cold shock domain protein A short isoform               | 5  | 2  | 2  |
| 242247116 | Dvwa     | collagen type VI alpha 4                                | 0  | 1  | 0  |
| 161484654 | Col4a1   | collagen, type IV, alpha 1                              | 0  | 0  | 1  |
| 6753484   | Col6a1   | collagen, type VI, alpha 1                              | 0  | 0  | 1  |
| 22203747  | Col6a2   | collagen, type VI, alpha 2                              | 0  | 0  | 1  |
| 157057559 | Col23a1  | collagen, type XXIII, alpha 1                           | 0  | 1  | 0  |

|           |               |                                                                                         |    |    |   |
|-----------|---------------|-----------------------------------------------------------------------------------------|----|----|---|
| 226053018 | Colec10       | collectin sub-family member 10                                                          | 0  | 1  | 0 |
| 126723423 | Csf1r         | colony stimulating factor 1 receptor                                                    | 0  | 1  | 0 |
| 6681049   | Csf2rb2       | colony stimulating factor 2 receptor, beta 2, low-affinity (granulocyte-macrophage)     | 0  | 0  | 1 |
| 110626003 | Comm2         | COMM domain containing 2                                                                | 0  | 1  | 0 |
| 112181167 | C1qbp         | complement component 1, q subcomponent binding protein                                  | 5  | 6  | 6 |
| 157951694 | C2            | complement component 2                                                                  | 0  | 0  | 1 |
| 126518317 | C3            | complement component 3                                                                  | 5  | 0  | 0 |
| 157951698 | C4b           | complement component 4B                                                                 | 0  | 1  | 0 |
| 109627652 | Cfh           | complement component factor H                                                           | 1  | 0  | 0 |
| 52426750  | Cr1l          | complement receptor related protein                                                     | 1  | 1  | 0 |
| 256985208 | Cog2          | component of oligomeric golgi complex 2                                                 | 1  | 0  | 0 |
| 119392070 | Cog3          | component of oligomeric golgi complex 3                                                 | 1  | 0  | 0 |
| 160333744 | Cog6          | component of oligomeric golgi complex 6                                                 | 1  | 0  | 0 |
| 66392581  | Cog8          | component of oligomeric golgi complex 8                                                 | 1  | 0  | 0 |
| 124430553 | Cdan1         | congenital dyserythropoietic anemia, type I                                             | 0  | 0  | 1 |
| 29244248  | Cnksr2        | connector enhancer of kinase suppressor of Ras 2                                        | 0  | 1  | 0 |
| 254281178 | 1110007L15Rik | conserved edge expressed protein isoform 1                                              | 1  | 0  | 1 |
| 71725355  | Zc3h18        | conserved nuclear protein Nhn1 isoform a                                                | 1  | 1  | 7 |
| 283046667 | Cntn5         | contactin 5                                                                             | 1  | 0  | 0 |
| 116063560 | Cntnap1       | contactin associated protein 1                                                          | 0  | 0  | 1 |
| 70909327  | Cops2         | COP9 (constitutive photomorphogenic) homolog, subunit 2                                 | 2  | 2  | 0 |
| 255760052 | Cops7a        | COP9 (constitutive photomorphogenic) homolog, subunit 7a                                | 2  | 1  | 0 |
| 6753488   | Cops3         | COP9 (constitutive photomorphogenic), subunit 3                                         | 2  | 1  | 0 |
| 6753490   | Cops4         | COP9 signalosome subunit 4                                                              | 9  | 2  | 0 |
| 7304971   | Cops5         | COP9 signalosome subunit 5                                                              | 4  | 1  | 1 |
| 33563284  | Cops6         | COP9 signalosome subunit 6                                                              | 3  | 0  | 0 |
| 114158691 | Cops8         | COP9 signalosome subunit 8                                                              | 1  | 3  | 0 |
| 25141332  | Cpne1         | copine I                                                                                | 4  | 0  | 0 |
| 25141335  | Cpne3         | copine III                                                                              | 4  | 0  | 0 |
| 23346611  | Cpne5         | copine V                                                                                | 0  | 1  | 0 |
| 226052679 | Cpne6         | copine VI isoform a                                                                     | 1  | 0  | 0 |
| 76563928  | Cpne8         | copine VIII isoform 1                                                                   | 5  | 1  | 0 |
| 161484660 | Cpox          | coproporphyrinogen oxidase                                                              | 11 | 0  | 0 |
| 162135966 | Cobl          | cordon-bleu protein                                                                     | 0  | 1  | 0 |
| 282396086 | C1galt1       | core 1 synthase, glycoprotein-N-acetylgalactosamine 3-beta-galactosyltransferase, 1     | 0  | 1  | 0 |
| 161353494 | Cbfa2t2       | core-binding factor, runt domain, alpha subunit 2, translocated to, 2 homolog isoform 1 | 1  | 0  | 0 |
| 158081731 | Cbfa2t3       | core-binding factor, runt domain, alpha subunit 2, translocated to, 3 isoform 3         | 0  | 0  | 1 |
| 170295827 | Corin         | corin isoform 1                                                                         | 0  | 0  | 1 |
| 6753494   | Coro1b        | coronin, actin binding protein 1B                                                       | 2  | 13 | 1 |
| 31542413  | Coro1c        | coronin, actin binding protein 1C                                                       | 1  | 10 | 1 |
| 258645152 | Coro2a        | coronin, actin binding protein 2A                                                       | 0  | 5  | 0 |
| 75677414  | Cttn          | cortactin                                                                               | 6  | 15 | 2 |
| 45429990  | Crh           | corticotropin releasing hormone                                                         | 0  | 1  | 0 |
| 38259188  | Crhbp         | corticotropin releasing hormone binding protein                                         | 1  | 0  | 0 |
| 31541932  | Cox15         | COX15 homolog                                                                           | 2  | 0  | 3 |
| 6754870   | Cox4nb        | COX4 neighbor                                                                           | 2  | 0  | 3 |
| 68510034  | Cxadr         | coxsackievirus and adenovirus receptor isoform b                                        | 2  | 0  | 0 |
| 33695139  | 6330503K22Rik | CP110 protein                                                                           | 1  | 0  | 2 |

|           |               |                                                                                          |   |    |    |
|-----------|---------------|------------------------------------------------------------------------------------------|---|----|----|
| 6753412   | Cfdp1         | craniofacial development protein 1                                                       | 2 | 2  | 0  |
| 6753428   | Ckmt1         | creatine kinase, mitochondrial 1, ubiquitous                                             | 3 | 10 | 0  |
| 70995311  | Crebbp        | CREB binding protein                                                                     | 0 | 5  | 0  |
| 13385288  | Crnk1         | crooked neck-like 1 protein                                                              | 0 | 1  | 13 |
| 29244038  | Crb3          | crumbs homolog 3                                                                         | 1 | 1  | 1  |
| 6753530   | Cryab         | crystallin, alpha B                                                                      | 0 | 0  | 1  |
| 19525729  | Cryl1         | crystallin, lambda 1                                                                     | 1 | 0  | 0  |
| 33859530  | Cryz          | crystallin, zeta                                                                         | 9 | 0  | 0  |
| 259155334 | Ctage5        | CTAGE family, member 5                                                                   | 2 | 0  | 0  |
| 47059059  | Ctdspl2       | CTD (carboxy-terminal domain, RNA polymerase II, polypeptide A) small phosphatase like 2 | 0 | 0  | 4  |
| 311893328 | Ctbp1         | C-terminal binding protein 1                                                             | 3 | 7  | 0  |
| 282721029 | Ctbp2         | C-terminal binding protein 2                                                             | 2 | 11 | 0  |
| 172072613 | Ctps          | CTP synthase                                                                             | 7 | 0  | 1  |
| 270483776 | Ctps2         | CTP synthase II                                                                          | 2 | 0  | 0  |
| 254039646 | Cttntp2nl     | CTTNBP2 N-terminal like                                                                  | 2 | 1  | 0  |
| 161086986 | Csmd3         | CUB and Sushi multiple domains 3                                                         | 1 | 0  | 0  |
| 237757271 | Cugbp2        | CUG triplet repeat, RNA binding protein 2 isoform 5                                      | 0 | 2  | 2  |
| 38570086  | Cugbp1        | CUG triplet repeat, RNA-binding protein 1 isoform 2                                      | 0 | 5  | 5  |
| 7549752   | Cul1          | cullin 1                                                                                 | 1 | 2  | 0  |
| 170014698 | Cul2          | cullin 2                                                                                 | 2 | 0  | 1  |
| 7710014   | Cul3          | cullin 3                                                                                 | 1 | 0  | 1  |
| 167466258 | Cul4a         | cullin 4A                                                                                | 0 | 1  | 0  |
| 158711665 | Cul4b         | cullin 4B                                                                                | 3 | 1  | 3  |
| 239051082 | Cul5          | cullin 5 isoform 1                                                                       | 3 | 1  | 2  |
| 57013279  | Cul7          | cullin 7                                                                                 | 2 | 0  | 0  |
| 110835729 | Cux1          | cut-like homeobox 1 isoform b                                                            | 2 | 30 | 0  |
| 40789277  | Cux2          | cut-like homeobox 2                                                                      | 1 | 0  | 0  |
| 12963537  | Cwc15         | CWC15 homolog                                                                            | 0 | 3  | 2  |
| 323462203 | Cwc22         | CWC22 spliceosome-associated protein homolog                                             | 0 | 0  | 7  |
| 124487291 | Cwf19l1       | CWF19-like 1, cell cycle control                                                         | 1 | 2  | 0  |
| 30842792  | Cwf19l2       | CWF19-like 2, cell cycle control                                                         | 0 | 0  | 1  |
| 18390325  | Cxxc1         | CXXC finger 1 (PHD domain)                                                               | 1 | 0  | 0  |
| 241896976 | Cxxc6         | CXXC finger 6 isoform 1                                                                  | 1 | 0  | 0  |
| 172072638 | Ccnc          | cyclin C isoform 1                                                                       | 0 | 2  | 0  |
| 160333146 | Dmtf1         | cyclin D binding myb-like transcription factor 1 isoform 2                               | 1 | 0  | 0  |
| 6753314   | Ccng1         | cyclin G1                                                                                | 0 | 0  | 1  |
| 12963599  | Ccnh          | cyclin H                                                                                 | 0 | 2  | 0  |
| 157841168 | Ccnk          | cyclin K                                                                                 | 0 | 2  | 0  |
| 46592877  | Ccnl2         | cyclin L2                                                                                | 1 | 0  | 0  |
| 156447048 | Cnnm2         | cyclin M2 isoform a                                                                      | 1 | 0  | 0  |
| 56550069  | Ccnt2         | cyclin T2                                                                                | 0 | 0  | 1  |
| 237858589 | Cdk10         | cyclin-dependent kinase 10 isoform 2                                                     | 1 | 0  | 0  |
| 323462189 | 2810452K22Rik | cyclin-dependent kinase 2-interacting protein                                            | 0 | 2  | 0  |
| 6753380   | Cdk4          | cyclin-dependent kinase 4                                                                | 1 | 1  | 0  |
| 6680908   | Cdk5          | cyclin-dependent kinase 5                                                                | 0 | 0  | 1  |
| 160333726 | Cdk7          | cyclin-dependent kinase 7                                                                | 0 | 1  | 0  |
| 31652272  | Cdk8          | cyclin-dependent kinase 8                                                                | 0 | 2  | 0  |
| 18699998  | Cdk9          | cyclin-dependent kinase 9                                                                | 1 | 0  | 1  |
| 31542372  | Cdkn1b        | cyclin-dependent kinase inhibitor 1B                                                     | 1 | 0  | 0  |
| 98986447  | Cdkn2a        | cyclin-dependent kinase inhibitor 2A isoform 1                                           | 0 | 1  | 1  |
| 262263406 | Cdkl3         | cyclin-dependent kinase-like 3                                                           | 1 | 0  | 0  |
| 124244037 | Cdkl5         | cyclin-dependent kinase-like 5                                                           | 0 | 1  | 0  |
| 6681071   | Cstb          | cystatin B                                                                               | 2 | 0  | 0  |

|           |               |                                                                               |    |    |    |
|-----------|---------------|-------------------------------------------------------------------------------|----|----|----|
| 6681069   | Csrp1         | cysteine and glycine-rich protein 1                                           | 2  | 8  | 0  |
| 160707987 | Csrp2         | cysteine and glycine-rich protein 2                                           | 0  | 4  | 0  |
| 262231838 | Csrp2bp       | cysteine and glycine-rich protein 2 binding protein                           | 0  | 1  | 0  |
| 13385324  | Chordc1       | cysteine and histidine-rich domain (CHORD)-containing, zinc-binding protein 1 | 2  | 0  | 1  |
| 71895029  | Crim1         | cysteine rich transmembrane BMP regulator 1 (chordin like)                    | 1  | 0  | 0  |
| 55742749  | Chic1         | cysteine-rich hydrophobic domain 1                                            | 0  | 1  | 0  |
| 254692987 | Cypt12        | cysteine-rich perinuclear theca 12                                            | 1  | 0  | 0  |
| 114842383 | Cypt3         | cysteine-rich perinuclear theca 3                                             | 0  | 1  | 1  |
| 6681015   | Crip1         | cysteine-rich protein 1 (intestinal)                                          | 1  | 0  | 0  |
| 19527148  | Creld1        | cysteine-rich with EGF-like domains 1                                         | 1  | 0  | 0  |
| 21313278  | Creld2        | cysteine-rich with EGF-like domains 2                                         | 5  | 0  | 0  |
| 23463295  | Csrnp1        | cysteine-serine-rich nuclear protein 1                                        | 1  | 0  | 0  |
| 148747198 | Cars          | cysteinyl-tRNA synthetase                                                     | 0  | 0  | 1  |
| 270483872 | Cdadc1        | cytidine and dCMP deaminase domain containing 1                               | 0  | 1  | 0  |
| 247269309 | Cmas          | cytidine monophospho-N-acetylneuraminic acid synthetase                       | 1  | 16 | 0  |
| 34538610  | CYTB          | cytochrome b                                                                  | 0  | 0  | 1  |
| 13385268  | Cyb5          | cytochrome b-5                                                                | 3  | 0  | 0  |
| 21312524  | Cyb5r1        | cytochrome b5 reductase 1                                                     | 6  | 0  | 1  |
| 19745150  | Cyb5r3        | cytochrome b5 reductase 3                                                     | 19 | 4  | 12 |
| 31542438  | Cyb5b         | cytochrome b5 type B precursor                                                | 4  | 2  | 4  |
| 34538600  | COX1          | cytochrome c oxidase subunit I                                                | 1  | 0  | 2  |
| 34538601  | COX2          | cytochrome c oxidase subunit II                                               | 5  | 3  | 7  |
| 34538604  | COX3          | cytochrome c oxidase subunit III                                              | 1  | 0  | 1  |
| 6753498   | Cox4i1        | cytochrome c oxidase subunit IV isoform 1                                     | 8  | 3  | 10 |
| 13385090  | Cox6b1        | cytochrome c oxidase subunit VIb polypeptide 1                                | 6  | 2  | 5  |
| 226958512 | Cox7a2l       | cytochrome c oxidase subunit VIIa polypeptide 2-like isoform 2                | 2  | 0  | 2  |
| 62945234  | Cox17         | cytochrome c oxidase subunit XVII assembly protein homolog                    | 2  | 0  | 0  |
| 112181182 | Cox5a         | cytochrome c oxidase, subunit Va                                              | 8  | 5  | 9  |
| 6680988   | Cox6a1        | cytochrome c oxidase, subunit VI a, polypeptide 1                             | 2  | 0  | 3  |
| 16716343  | Cox6c         | cytochrome c oxidase, subunit VIc                                             | 4  | 1  | 3  |
| 31981830  | Cox7a2        | cytochrome c oxidase, subunit VIIa 2                                          | 2  | 2  | 2  |
| 6680991   | Cox7c         | cytochrome c oxidase, subunit VIIC                                            | 2  | 0  | 1  |
| 6681095   | Cycs          | cytochrome c, somatic                                                         | 3  | 13 | 0  |
| 13385006  | Cyc1          | cytochrome c-1                                                                | 8  | 3  | 8  |
| 6679421   | Por           | cytochrome P450 reductase                                                     | 30 | 0  | 4  |
| 6753568   | Cyp1b1        | cytochrome P450, family 1, subfamily b, polypeptide 1                         | 0  | 1  | 0  |
| 19526798  | Cyp2a12       | cytochrome P450, family 2, subfamily a, polypeptide 12                        | 0  | 0  | 1  |
| 160948612 | Cyp2d9        | cytochrome P450, family 2, subfamily d, polypeptide 9                         | 0  | 0  | 1  |
| 28893407  | Cyp4f39       | cytochrome P450, family 2, subfamily E, polypeptide 2 homolog                 | 1  | 0  | 0  |
| 239985506 | Cyp2j11       | cytochrome P450, family 2, subfamily j, polypeptide 11                        | 1  | 0  | 0  |
| 74271886  | Cyp20a1       | cytochrome P450, family 20, subfamily A, polypeptide 1                        | 0  | 0  | 1  |
| 30578401  | Cyp27a1       | cytochrome P450, family 27, subfamily A, polypeptide 1                        | 1  | 1  | 0  |
| 6681121   | Cyp4a14       | cytochrome P450, family 4, subfamily a, polypeptide 14                        | 0  | 0  | 1  |
| 71061451  | Cyp51         | cytochrome P450, family 51, subfamily A, polypeptide 1                        | 3  | 0  | 0  |
| 19527376  | Ciapin1       | cytokine induced apoptosis inhibitor 1                                        | 2  | 0  | 0  |
| 13384730  | Sarnp         | cytokine induced protein 29 kDa                                               | 0  | 8  | 3  |
| 119392074 | 3930401K13Rik | cytokine-like nuclear factor n-pac isoform 1                                  | 0  | 18 | 8  |
| 162329564 | Caprin1       | cytoplasmic activation/proliferation-associated protein 1 isoform c           | 9  | 5  | 0  |

|           |             |                                                     |    |    |    |
|-----------|-------------|-----------------------------------------------------|----|----|----|
| 134288917 | Dync1h1     | cytoplasmic dynein 1 heavy chain 1                  | 16 | 96 | 9  |
| 258547119 | Cyfp1       | cytoplasmic FMR1 interacting protein 1              | 2  | 16 | 0  |
| 84370256  | Cyfp2       | cytoplasmic FMR1 interacting protein 2              | 2  | 14 | 3  |
| 85662406  | Clip2       | cytoplasmic linker 2 isoform a                      | 0  | 0  | 1  |
| 269315836 | Ckap2       | cytoskeleton associated protein 2                   | 1  | 0  | 0  |
| 31712008  | Ckap2l      | cytoskeleton associated protein 2-like              | 0  | 1  | 0  |
| 260166721 | Ckap5       | cytoskeleton associated protein 5                   | 0  | 14 | 0  |
| 62526118  | Ckap4       | cytoskeleton-associated protein 4                   | 1  | 0  | 0  |
| 312147392 | Me1         | cytosolic malic enzyme 1                            | 4  | 0  | 0  |
| 6679369   | Pla2g4a     | cytosolic phospholipase A2, group IVA               | 0  | 1  | 0  |
| 224922837 | Cytsa       | cytospin A isoform b                                | 0  | 1  | 0  |
| 71979930  | Cytsb       | cytospin B                                          | 0  | 1  | 5  |
| 255760011 | Tia1        | cytotoxic granule-associated RNA binding protein 1  | 0  | 3  | 0  |
| 170650717 | Dbp         | D site albumin promoter binding protein             | 1  | 0  | 0  |
| 37574121  | Scyl2       | D10Ert802e protein                                  | 0  | 0  | 1  |
| 29126213  | D19Bwg1357e | D19Bwg1357e protein                                 | 0  | 0  | 13 |
| 6755314   | Dpf2        | D4, zinc and double PHD fingers family 2            | 0  | 10 | 3  |
| 237681081 | Miip        | D4Wsu114e protein                                   | 1  | 0  | 0  |
| 42734496  | Fam3c       | D6Wsu176e protein                                   | 9  | 0  | 5  |
| 7657011   | Ddb1        | damage specific DNA binding protein 1               | 13 | 15 | 12 |
| 29150251  | Ddb2        | damage specific DNA binding protein 2               | 0  | 3  | 0  |
| 24158474  | Dact1       | dapper 1                                            | 0  | 1  | 0  |
| 169790823 | Dazap1      | DAZ associated protein 1 isoform a                  | 1  | 9  | 2  |
| 13384930  | Ostc        | DC2 protein                                         | 2  | 0  | 1  |
| 238859575 | Dctd        | dCMP deaminase                                      | 1  | 0  | 0  |
| 257900506 | Dcp1b       | DCP1 decapping enzyme homolog b                     | 0  | 1  | 0  |
| 56090231  | Dcaf5       | DDB1 and CUL4 associated factor 5                   | 2  | 0  | 0  |
| 6753618   | Ddt         | D-dopachrome tautomerase                            | 6  | 0  | 0  |
| 110350660 | Ddrgk1      | DDRKG domain containing 1                           | 1  | 0  | 0  |
| 299890868 | Ddx19b      | DDX19 homolog                                       | 0  | 2  | 0  |
| 19527256  | Ddx1        | DEAD (Asp-Glu-Ala-Asp) box polypeptide 1            | 8  | 19 | 5  |
| 189491668 | Ddx10       | DEAD (Asp-Glu-Ala-Asp) box polypeptide 10           | 0  | 0  | 3  |
| 31981163  | Ddx18       | DEAD (Asp-Glu-Ala-Asp) box polypeptide 18           | 0  | 17 | 13 |
| 148540073 | Ddx20       | DEAD (Asp-Glu-Ala-Asp) box polypeptide 20           | 0  | 0  | 1  |
| 72384374  | Ddx21       | DEAD (Asp-Glu-Ala-Asp) box polypeptide 21           | 0  | 39 | 22 |
| 124430514 | Ddx23       | DEAD (Asp-Glu-Ala-Asp) box polypeptide 23           | 4  | 15 | 2  |
| 34328253  | Ddx24       | DEAD (Asp-Glu-Ala-Asp) box polypeptide 24 isoform 2 | 0  | 0  | 4  |
| 163914388 | Ddx25       | DEAD (Asp-Glu-Ala-Asp) box polypeptide 25           | 1  | 0  | 0  |
| 124249330 | Ddx27       | DEAD (Asp-Glu-Ala-Asp) box polypeptide 27           | 0  | 0  | 6  |
| 25141235  | Ddx3y       | DEAD (Asp-Glu-Ala-Asp) box polypeptide 3, Y-linked  | 13 | 5  | 9  |
| 38372907  | Ddx39       | DEAD (Asp-Glu-Ala-Asp) box polypeptide 39           | 13 | 22 | 16 |
| 270047502 | Ddx41       | DEAD (Asp-Glu-Ala-Asp) box polypeptide 41           | 0  | 1  | 2  |
| 157838001 | Ddx42       | DEAD (Asp-Glu-Ala-Asp) box polypeptide 42           | 1  | 15 | 0  |
| 27229058  | Ddx47       | DEAD (Asp-Glu-Ala-Asp) box polypeptide 47           | 1  | 12 | 2  |
| 67972435  | Ddx49       | DEAD (Asp-Glu-Ala-Asp) box polypeptide 49           | 1  | 4  | 0  |
| 83816893  | Ddx5        | DEAD (Asp-Glu-Ala-Asp) box polypeptide 5            | 19 | 24 | 24 |
| 16716475  | Ddx50       | DEAD (Asp-Glu-Ala-Asp) box polypeptide 50           | 0  | 1  | 7  |
| 40538825  | Ddx51       | DEAD (Asp-Glu-Ala-Asp) box polypeptide 51           | 0  | 2  | 2  |
| 256985213 | Ddx52       | DEAD (Asp-Glu-Ala-Asp) box polypeptide 52           | 0  | 0  | 1  |
| 28076989  | Ddx54       | DEAD (Asp-Glu-Ala-Asp) box polypeptide 54           | 0  | 0  | 5  |
| 161016793 | Ddx6        | DEAD (Asp-Glu-Ala-Asp) box polypeptide 6            | 7  | 8  | 2  |
| 124487049 | Ddx60       | DEAD (Asp-Glu-Ala-Asp) box polypeptide 60           | 1  | 0  | 1  |
| 93587673  | Ddx17       | DEAD box polypeptide 17 isoform 1                   | 5  | 17 | 7  |
| 160420299 | Ddx46       | DEAD box polypeptide 46                             | 1  | 3  | 0  |

|           |          |                                                                 |    |    |    |
|-----------|----------|-----------------------------------------------------------------|----|----|----|
| 6753620   | Ddx3x    | DEAD/H (Asp-Glu-Ala-Asp/His) box polypeptide 3, X-linked        | 2  | 1  | 1  |
| 254675193 | Ddx31    | DEAD/H (Asp-Glu-Ala-Asp/His) box polypeptide 31                 | 1  | 0  | 1  |
| 110835726 | Dhx15    | DEAH (Asp-Glu-Ala-His) box polypeptide 15 isoform 2             | 3  | 16 | 20 |
| 226246667 | Dhx16    | DEAH (Asp-Glu-Ala-His) box polypeptide 16                       | 0  | 0  | 1  |
| 46852276  | Dhx29    | DEAH (Asp-Glu-Ala-His) box polypeptide 29                       | 0  | 0  | 1  |
| 46560585  | Dhx33    | DEAH (Asp-Glu-Ala-His) box polypeptide 33                       | 1  | 1  | 0  |
| 240848573 | Dhx36    | DEAH (Asp-Glu-Ala-His) box polypeptide 36                       | 0  | 0  | 2  |
| 42600571  | Dhx37    | DEAH (Asp-Glu-Ala-His) box polypeptide 37                       | 0  | 5  | 2  |
| 30410010  | Dhx38    | DEAH (Asp-Glu-Ala-His) box polypeptide 38                       | 0  | 3  | 0  |
| 144926009 | Dhx40    | DEAH (Asp-Glu-Ala-His) box polypeptide 40                       | 0  | 1  | 0  |
| 56699440  | Dhx8     | DEAH (Asp-Glu-Ala-His) box polypeptide 8                        | 0  | 1  | 2  |
| 150456419 | Dhx9     | DEAH (Asp-Glu-Ala-His) box polypeptide 9                        | 2  | 39 | 53 |
| 76096375  | Dido1    | death inducer-obliterator 1 isoform 3                           | 0  | 9  | 0  |
| 256985205 | Dap3     | death-associated protein 3                                      | 2  | 1  | 1  |
| 189491664 | Dcp2     | decapping enzyme hDcp2                                          | 0  | 0  | 1  |
| 88853584  | Dock1    | dedicator of cytokinesis 1                                      | 0  | 5  | 1  |
| 190194393 | Dock10   | dedicator of cytokinesis 10                                     | 0  | 1  | 0  |
| 117553625 | Dock2    | dedicator of cyto-kinesis 2                                     | 0  | 1  | 0  |
| 148277096 | Dock3    | dedicator of cyto-kinesis 3                                     | 0  | 0  | 1  |
| 124358946 | Dock5    | dedicator of cytokinesis 5                                      | 1  | 1  | 0  |
| 78191789  | Dock7    | dedicator of cytokinesis 7                                      | 1  | 2  | 1  |
| 62241030  | Dock8    | dedicator of cytokinesis 8                                      | 0  | 2  | 2  |
| 190194401 | Dock9    | dedicator of cytokinesis 9 isoform 2                            | 1  | 3  | 0  |
| 164518942 | Dad1     | defender against cell death 1                                   | 2  | 1  | 1  |
| 147899924 | Defb8    | defensin beta 8                                                 | 1  | 0  | 0  |
| 8393248   | Deaf1    | deformed epidermal autoregulatory factor 1                      | 0  | 1  | 0  |
| 6681175   | Degs1    | degenerative spermatocyte homolog 1                             | 1  | 0  | 0  |
| 27754093  | Dhdds    | dehydrololichyl diphosphate synthase                            | 1  | 0  | 1  |
| 124487485 | Dhtkd1   | dehydrogenase E1 and transketolase domain containing 1          | 1  | 1  | 0  |
| 31980844  | Dhrs1    | dehydrogenase/reductase (SDR family) member 1                   | 12 | 0  | 1  |
| 117647267 | Dhrs13   | dehydrogenase/reductase (SDR family) member 13                  | 0  | 0  | 1  |
| 21703854  | Dhrs7b   | dehydrogenase/reductase (SDR family) member 7B                  | 2  | 0  | 4  |
| 253795498 | Dek      | DEK oncogene                                                    | 0  | 15 | 2  |
| 51371928  | Nipbl    | delangin isoform A                                              | 0  | 12 | 14 |
| 302699225 | Dlc1     | deleted in liver cancer 1                                       | 0  | 1  | 0  |
| 87239967  | Dmbt1    | deleted in malignant brain tumors 1                             | 0  | 1  | 0  |
| 33942059  | Ppp2r5d  | delta isoform of regulatory subunit B56, protein phosphatase 2A | 3  | 0  | 0  |
| 22164784  | Fads1    | delta-5 desaturase                                              | 3  | 1  | 2  |
| 34328485  | Alad     | delta-aminolevulinic acid dehydratase                           | 7  | 2  | 0  |
| 299758514 | Dlk1     | delta-like 1 homolog                                            | 0  | 0  | 1  |
| 116292184 | Dll3     | delta-like 3                                                    | 1  | 0  | 0  |
| 133930784 | Dtx3l    | deltex 3-like                                                   | 1  | 0  | 1  |
| 58037277  | Dennd2d  | DENN/MADD domain containing 2D isoform 1                        | 0  | 3  | 0  |
| 124486610 | Dennd4c  | DENN/MADD domain containing 4C                                  | 0  | 1  | 0  |
| 13386092  | Denr     | density-regulated protein                                       | 0  | 3  | 0  |
| 34328110  | Atn1     | dentatorubral pallidoluysian atrophy                            | 1  | 0  | 0  |
| 247269607 | Dguok    | deoxyguanosine kinase isoform 1                                 | 1  | 0  | 0  |
| 148539953 | Dnase1l2 | deoxyribonuclease 1-like 2                                      | 7  | 0  | 0  |
| 6753654   | Dnase2a  | deoxyribonuclease II alpha                                      | 4  | 0  | 0  |
| 157785665 | Dtymk    | deoxythymidylate kinase isoform 1                               | 3  | 0  | 0  |
| 227497222 | Dut      | deoxyuridine triphosphatase isoform 2                           | 4  | 4  | 0  |

|           |               |                                                                                  |    |    |     |
|-----------|---------------|----------------------------------------------------------------------------------|----|----|-----|
| 31542025  | Depdc1a       | DEP domain containing 1a                                                         | 1  | 0  | 0   |
| 183583559 | Prex2         | DEP domain containing 2 isoform 1                                                | 1  | 0  | 1   |
| 70909320  | Depdc5        | DEP domain containing 5 isoform 1                                                | 0  | 0  | 1   |
| 27754054  | Dcakd         | dephospho-CoA kinase domain containing                                           | 8  | 3  | 8   |
| 13195638  | Der1          | Der1-like domain family, member 1                                                | 1  | 0  | 1   |
| 15808990  | Der12         | Der1-like domain family, member 2                                                | 1  | 0  | 0   |
| 161016841 | Dsc1          | desmocollin 1                                                                    | 0  | 1  | 0   |
| 7305007   | Dsc2          | desmocollin 2                                                                    | 0  | 0  | 2   |
| 32129201  | Dsg1b         | desmoglein 1 beta                                                                | 0  | 0  | 1   |
| 161016843 | Dsg2          | desmoglein 2                                                                     | 0  | 0  | 23  |
| 110625833 | Dsg3          | desmoglein 3                                                                     | 0  | 1  | 0   |
| 190194418 | Dsp           | desmoplakin                                                                      | 7  | 2  | 103 |
| 9790219   | Dstn          | destrin                                                                          | 12 | 10 | 5   |
| 6681225   | Drg1          | developmentally regulated GTP binding protein 1                                  | 3  | 7  | 0   |
| 10946678  | Drg2          | developmentally regulated GTP binding protein 2                                  | 3  | 0  | 0   |
| 23510273  | Rbm45         | developmentally regulated RNA binding protein 1                                  | 0  | 5  | 1   |
| 85719324  | Zdhhc20       | DHHC-containing protein 20                                                       | 0  | 1  | 0   |
| 27883850  | Ankrd23       | diabetes related ankyrin repeat protein                                          | 1  | 0  | 1   |
| 39841023  | Dgkq          | diacylglycerol kinase, theta                                                     | 1  | 0  | 0   |
| 31559956  | Daglb         | diacylglycerol lipase, beta                                                      | 0  | 0  | 1   |
| 6753632   | Dgat1         | diacylglycerol O-acyltransferase 1                                               | 0  | 1  | 0   |
| 6677849   | Sat1          | diamine N-acetyltransferase 1                                                    | 1  | 0  | 0   |
| 253735769 | 1600015I10Rik | diamine oxidase-like protein 1                                                   | 0  | 0  | 1   |
| 6681183   | Diap1         | diaphanous homolog 1                                                             | 7  | 0  | 1   |
| 9789931   | Diap3         | diaphanous homolog 3                                                             | 1  | 0  | 0   |
| 83921595  | Dbi           | diazepam binding inhibitor isoform 2                                             | 2  | 0  | 0   |
| 146134409 | Dcxr          | dicarbonyl/L-xylulose reductase                                                  | 1  | 0  | 0   |
| 117168271 | Dicer1        | dicer1                                                                           | 1  | 0  | 0   |
| 255308871 | Def6          | differentially expressed in FDCP 6                                               | 1  | 0  | 0   |
| 126362981 | Dgcr14        | DiGeorge syndrome critical region protein 14 isoform 1                           | 0  | 0  | 1   |
| 56790942  | AA408296      | digestive-organ expansion factor homolog                                         | 0  | 1  | 0   |
| 13385656  | Dhdpsl        | dihydrodipicolinate synthase-like, mitochondrial                                 | 1  | 0  | 0   |
| 7106289   | Dhfr          | dihydrofolate reductase                                                          | 1  | 0  | 4   |
| 170172520 | Dbt           | dihydrolipoamide branched chain transacylase E2                                  | 6  | 16 | 4   |
| 31982856  | Dld           | dihydrolipoamide dehydrogenase                                                   | 17 | 3  | 0   |
| 257796245 | Dlat          | dihydrolipoamide S-acetyltransferase                                             | 17 | 4  | 4   |
| 21313536  | Dlst          | dihydrolipoamide S-succinyltransferase (E2 component of 2-oxo-glutarate complex) | 10 | 3  | 2   |
| 9910194   | Dhodh         | dihydroorotate dehydrogenase                                                     | 6  | 0  | 0   |
| 40254595  | Dpysl2        | dihydropyrimidinase-like 2                                                       | 23 | 1  | 0   |
| 209862992 | Dpysl3        | dihydropyrimidinase-like 3 isoform 2                                             | 0  | 0  | 1   |
| 38371755  | Ddah1         | dimethylarginine dimethylaminohydrolase 1                                        | 1  | 0  | 0   |
| 299522791 | Ddah2         | dimethylarginine dimethylaminohydrolase 2                                        | 4  | 1  | 0   |
| 226823258 | Dip2b         | DIP2 disco-interacting protein 2 homolog B isoform 2                             | 0  | 1  | 1   |
| 32880214  | Dpep2         | dipeptidase 2                                                                    | 1  | 1  | 0   |
| 244791124 | Dpp3          | dipeptidyl peptidase III                                                         | 16 | 0  | 0   |
| 31981425  | Dpp7          | dipeptidylpeptidase 7                                                            | 7  | 0  | 0   |
| 40254642  | Dlg1          | discs large homolog 1                                                            | 16 | 21 | 14  |
| 254588085 | Dlg5          | discs, large homolog 5 (Drosophila)                                              | 0  | 1  | 0   |
| 38348480  | Dlgap3        | disks large-associated protein 3                                                 | 0  | 1  | 1   |
| 62198210  | Cuta          | divalent cation tolerant protein CUTA isoform 2                                  | 1  | 0  | 0   |
| 46559410  | Dixdc1        | DIX domain containing 1                                                          | 0  | 0  | 1   |
| 34328379  | Ldhd          | D-lactate dehydrogenase                                                          | 3  | 0  | 0   |
| 124487031 | Dmx1          | Dmx-like 1                                                                       | 0  | 3  | 0   |

|           |         |                                                       |   |    |    |
|-----------|---------|-------------------------------------------------------|---|----|----|
| 114145469 | Dclre1a | DNA cross-link repair 1A, PSO2 homolog                | 1 | 0  | 1  |
| 226958589 | Polr2b  | DNA directed RNA polymerase II polypeptide B          | 0 | 5  | 22 |
| 58037181  | Polr2f  | DNA directed RNA polymerase II polypeptide F          | 0 | 2  | 1  |
| 70608144  | Dffa    | DNA fragmentation factor, alpha subunit isoform a     | 0 | 1  | 0  |
| 160948620 | Dffb    | DNA fragmentation factor, beta subunit                | 0 | 2  | 0  |
| 313151236 | Lig1    | DNA ligase I                                          | 1 | 8  | 0  |
| 84794637  | Lig4    | DNA ligase IV                                         | 0 | 1  | 0  |
| 327180734 | Dnmt1   | DNA methyltransferase (cytosine-5) 1                  | 1 | 69 | 3  |
| 24371231  | Dnmt3a  | DNA methyltransferase 3A isoform 1                    | 0 | 0  | 8  |
| 30519969  | Poldip3 | DNA polymerase delta interacting protein 3            | 0 | 12 | 0  |
| 226823286 | Polq    | DNA polymerase theta isoform 1                        | 0 | 1  | 0  |
| 153792337 | Rev3l   | DNA polymerase zeta                                   | 0 | 1  | 1  |
| 6679461   | Prim2   | DNA primase, p58 subunit                              | 1 | 0  | 0  |
| 283837769 | Dna2    | DNA replication helicase 2 homolog                    | 0 | 0  | 1  |
| 27369676  | Sepsecs | DNA segment, Chr 5, ERATO Doi 135, expressed          | 1 | 0  | 1  |
| 112734855 | Top1    | DNA topoisomerase I                                   | 0 | 33 | 7  |
| 31541839  | Ddit4l  | DNA-damage-inducible transcript 4-like                | 1 | 0  | 0  |
| 6679409   | Pola1   | DNA-directed DNA polymerase alpha 1                   | 3 | 0  | 0  |
| 255708463 | Pola2   | DNA-directed DNA polymerase alpha 2                   | 1 | 0  | 0  |
| 254587977 | Pold1   | DNA-directed DNA polymerase delta 1                   | 1 | 0  | 0  |
| 226423863 | Pold2   | DNA-directed DNA polymerase delta 2                   | 0 | 2  | 0  |
| 195947387 | Pole    | DNA-directed DNA polymerase epsilon                   | 1 | 0  | 0  |
| 33468927  | Pole2   | DNA-directed DNA polymerase epsilon 2                 | 1 | 0  | 0  |
| 31981174  | Pole3   | DNA-directed DNA polymerase epsilon 3                 | 0 | 3  | 0  |
| 13385366  | Pole4   | DNA-directed DNA polymerase epsilon 4                 | 0 | 1  | 0  |
| 9910500   | Poll    | DNA-directed DNA polymerase lambda                    | 1 | 0  | 0  |
| 46309579  | Poln    | DNA-directed DNA polymerase nu                        | 0 | 1  | 0  |
| 256985188 | Polr1a  | DNA-directed RNA polymerase I A                       | 0 | 12 | 0  |
| 6677795   | Polr2a  | DNA-directed RNA polymerase II A                      | 0 | 3  | 17 |
| 6680297   | Dnaja1  | DnaJ (Hsp40) homolog, subfamily A, member 1           | 2 | 1  | 3  |
| 9789937   | Dnaja2  | DnaJ (Hsp40) homolog, subfamily A, member 2           | 8 | 4  | 5  |
| 205361112 | Dnaja3  | DnaJ (Hsp40) homolog, subfamily A, member 3 isoform 1 | 5 | 4  | 6  |
| 9055242   | Dnajb1  | DnaJ (Hsp40) homolog, subfamily B, member 1           | 1 | 4  | 0  |
| 299890782 | Dnajb11 | DnaJ (Hsp40) homolog, subfamily B, member 11          | 5 | 4  | 0  |
| 226371690 | Dnajb14 | DnaJ (Hsp40) homolog, subfamily B, member 14          | 1 | 0  | 0  |
| 229577344 | Dnajb2  | DnaJ (Hsp40) homolog, subfamily B, member 2 isoform 1 | 1 | 0  | 1  |
| 165377271 | Dnajb4  | DnaJ (Hsp40) homolog, subfamily B, member 4           | 0 | 2  | 0  |
| 188219644 | Dnajb6  | DnaJ (Hsp40) homolog, subfamily B, member 6 isoform a | 0 | 0  | 3  |
| 119392096 | Dnajb7  | DnaJ (Hsp40) homolog, subfamily B, member 7           | 0 | 0  | 2  |
| 119508443 | Dnajc10 | DnaJ (Hsp40) homolog, subfamily C, member 10          | 4 | 4  | 0  |
| 164565394 | Dnajc11 | DnaJ (Hsp40) homolog, subfamily C, member 11          | 0 | 0  | 3  |
| 254540074 | Dnajc17 | DnaJ (Hsp40) homolog, subfamily C, member 17          | 0 | 3  | 0  |
| 6677659   | Dnajc2  | DnaJ (Hsp40) homolog, subfamily C, member 2           | 0 | 1  | 0  |
| 190194391 | Dnajc21 | DnaJ (Hsp40) homolog, subfamily C, member 21          | 1 | 1  | 1  |
| 70887607  | Dnajc27 | DnaJ (Hsp40) homolog, subfamily C, member 27          | 1 | 0  | 0  |
| 31542563  | Dnajc3  | DnaJ (Hsp40) homolog, subfamily C, member 3B          | 5 | 1  | 0  |
| 7949027   | Dnajc5  | DnaJ (Hsp40) homolog, subfamily C, member 5           | 1 | 0  | 0  |
| 257196146 | Dnajc6  | DnaJ (Hsp40) homolog, subfamily C, member 6           | 1 | 0  | 0  |
| 31980994  | Dnajc7  | DnaJ (Hsp40) homolog, subfamily C, member 7           | 1 | 0  | 0  |
| 157951606 | Dnajc8  | DnaJ (Hsp40) homolog, subfamily C, member 8           | 1 | 7  | 0  |
| 23956266  | Dnajc9  | DnaJ homolog, subfamily C, member 9                   | 1 | 2  | 9  |



|           |          |                                                                  |    |    |   |
|-----------|----------|------------------------------------------------------------------|----|----|---|
| 12963557  | Dmap1    | DNMT1 associated protein-1                                       | 1  | 6  | 2 |
| 31981810  | Dci      | dodecenoyl-Coenzyme A delta isomerase                            | 12 | 2  | 2 |
| 46195798  | Ddost    | dolichyl-di-phosphooligosaccharide-protein glycotransferase      | 13 | 1  | 7 |
| 6753670   | Dpm1     | dolichyl-phosphate mannosyltransferase 1                         | 10 | 0  | 1 |
| 58037125  | Dpm3     | dolichyl-phosphate mannosyltransferase polypeptide 3             | 2  | 0  | 0 |
| 170932475 | Dct      | dopachrome tautomerase                                           | 1  | 0  | 0 |
| 190194414 | Dopey1   | dopey family member 1                                            | 0  | 1  | 0 |
| 226246660 | Dpy30    | dosage compensation-related protein DPY30                        | 2  | 2  | 1 |
| 238776837 | Dclk3    | doublecortin-like kinase 3                                       | 0  | 0  | 1 |
| 9506555   | Psmg1    | Down syndrome critical region protein 2                          | 1  | 0  | 0 |
| 226437674 | Utp20    | down-regulated in metastasis                                     | 1  | 61 | 7 |
| 27754097  | Dr1      | down-regulator of transcription 1                                | 1  | 3  | 0 |
| 21313424  | Drap1    | Dr1 associated protein 1 (negative cofactor 2 alpha)             | 1  | 2  | 0 |
| 226423873 | Dbnl     | drebrin-like isoform 2                                           | 3  | 8  | 0 |
| 13384676  | Dtd1     | D-tyrosyl-tRNA deacylase 1                                       | 0  | 1  | 0 |
| 145966803 | Dusp5    | dual specificity phosphatase 5                                   | 0  | 1  | 0 |
| 67846105  | Dyrk2    | dual-specificity tyrosine-(Y)-phosphorylation regulated kinase 2 | 1  | 0  | 1 |
| 23956160  | Dullard  | Dullard homolog                                                  | 0  | 0  | 1 |
| 311893360 | Dctn1    | dynactin 1                                                       | 13 | 12 | 1 |
| 299522842 | Dctn2    | dynactin 2                                                       | 8  | 5  | 0 |
| 227116275 | Dctn3    | dynactin 3 isoform A                                             | 0  | 6  | 0 |
| 13385798  | Dctn4    | dynactin 4                                                       | 0  | 1  | 1 |
| 188219518 | Dctn5    | dynactin 5                                                       | 0  | 1  | 0 |
| 6756009   | Dctn6    | dynactin 6                                                       | 1  | 0  | 0 |
| 116063570 | Dnm1     | dynamamin                                                        | 0  | 1  | 0 |
| 71061458  | Dnm1l    | dynamamin 1-like isoform a                                       | 11 | 0  | 1 |
| 87299637  | Dnm2     | dynamamin 2                                                      | 2  | 1  | 1 |
| 27369922  | Dnm3     | dynamamin 3 isoform 1                                            | 1  | 0  | 0 |
| 311893387 | Dync1i2  | dynein cytoplasmic 1 intermediate chain 2                        | 3  | 6  | 0 |
| 22122795  | Dync1li1 | dynein cytoplasmic 1 light intermediate chain 1                  | 0  | 6  | 1 |
| 72534792  | Dync2h1  | dynein cytoplasmic 2 heavy chain 1                               | 0  | 0  | 1 |
| 213688406 | Dynll1   | dynein light chain LC8-type 1                                    | 2  | 4  | 4 |
| 281182477 | Dynll2   | dynein light chain LC8-type 2                                    | 1  | 1  | 0 |
| 254540041 | Dynlrb1  | dynein light chain roadblock-type 1                              | 0  | 2  | 0 |
| 6678265   | Dynlt1   | dynein light chain Tctex-type 1                                  | 0  | 5  | 1 |
| 124486773 | Dnahc2   | dynein, axonemal, heavy chain 2                                  | 0  | 1  | 0 |
| 114155137 | Dnahc5   | dynein, axonemal, heavy chain 5                                  | 0  | 0  | 2 |
| 153792273 | Dnahc8   | dynein, axonemal, heavy chain 8                                  | 0  | 0  | 1 |
| 153791933 | Dnahc9   | dynein, axonemal, heavy chain 9                                  | 0  | 1  | 1 |
| 227330593 | Dnaic1   | dynein, axonemal, intermediate chain 1                           | 0  | 1  | 0 |
| 225543181 | Dync1li2 | dynein, cytoplasmic 1 light intermediate chain 2                 | 1  | 5  | 1 |
| 118026931 | Dysf     | dysferlin isoform 1                                              | 2  | 0  | 0 |
| 91064867  | Dkc1     | dyskerin                                                         | 0  | 18 | 7 |
| 111154082 | Dst      | dystonin isoform b                                               | 0  | 7  | 2 |
| 15208633  | Dtnbp1   | dystrobrevin binding protein 1                                   | 1  | 0  | 1 |
| 247269964 | Dtnb     | dystrobrevin, beta isoform b                                     | 8  | 1  | 2 |
| 33859532  | Dag1     | dystroglycan 1                                                   | 3  | 0  | 0 |
| 161016837 | Drp2     | dystrophin related protein 2                                     | 0  | 0  | 1 |
| 6681203   | Dmd      | dystrophin, muscular dystrophy                                   | 1  | 0  | 1 |
| 30023855  | Eny2     | e(y)2 protein                                                    | 0  | 1  | 1 |
| 94421034  | Ep300    | E1A binding protein p300                                         | 0  | 2  | 0 |
| 190194425 | Ep400    | E1A binding protein p400 isoform 2                               | 0  | 5  | 0 |

|           |               |                                                                            |    |    |    |
|-----------|---------------|----------------------------------------------------------------------------|----|----|----|
| 257153394 | Ets2          | E26 avian leukemia oncogene 2, 3&apos; domain                              | 0  | 1  | 0  |
| 31982405  | E2f5          | E2F transcription factor 5                                                 | 1  | 0  | 0  |
| 6679627   | Elf1          | E74-like factor 1                                                          | 0  | 1  | 0  |
| 253683411 | Elf3          | E74-like factor 3 isoform 2                                                | 1  | 1  | 1  |
| 15809002  | Snf8          | EAP30 subunit of ELL complex                                               | 0  | 0  | 1  |
| 50053824  | Eea1          | early endosome antigen 1                                                   | 18 | 0  | 0  |
| 6681285   | Egr1          | early growth response 1                                                    | 1  | 0  | 0  |
| 21312728  | Ebna1bp2      | EBNA1 binding protein 2                                                    | 0  | 0  | 2  |
| 21450111  | Eml3          | echinoderm microtubule associated protein like 3                           | 0  | 1  | 0  |
| 167234437 | Eml4          | echinoderm microtubule associated protein like 4 3                         | 0  | 1  | 0  |
| 124487111 | Eml5          | echinoderm microtubule associated protein like 5                           | 1  | 0  | 1  |
| 127140886 | C230094A16Rik | echinoderm microtubule associated protein like 6                           | 1  | 0  | 0  |
| 111185905 | Evi5          | ecotropic viral integration site 5                                         | 0  | 0  | 1  |
| 22122383  | Enox2         | ecto-NOX disulfide-thiol exchanger 2                                       | 0  | 1  | 0  |
| 255683318 | Entpd3        | ectonucleoside triphosphate diphosphohydrolase 3                           | 0  | 1  | 0  |
| 71061462  | Entpd5        | ectonucleoside triphosphate diphosphohydrolase 5 isoform a                 | 2  | 0  | 0  |
| 209862963 | Enpp2         | ectonucleotide pyrophosphatase/phosphodiesterase 2 isoform 1               | 0  | 1  | 0  |
| 154240724 | Enpp3         | ectonucleotide pyrophosphatase/phosphodiesterase 3                         | 0  | 0  | 1  |
| 84872231  | Enpp4         | ectonucleotide pyrophosphatase/phosphodiesterase 4                         | 1  | 0  | 0  |
| 71892414  | Enpp7         | ectonucleotide pyrophosphatase/phosphodiesterase 7                         | 1  | 0  | 0  |
| 127139913 | Edaradd       | EDAR (ectodysplasin-A receptor)-associated death domain isoform 1          | 1  | 0  | 0  |
| 13386360  | Efhd1         | EF hand domain containing 1                                                | 0  | 0  | 1  |
| 31981086  | Efhd2         | EF hand domain containing 2                                                | 1  | 1  | 3  |
| 126723102 | Efr3b         | EFR3 homolog B                                                             | 0  | 0  | 1  |
| 9506563   | Egfl6         | EGF-like-domain, multiple 6                                                | 0  | 1  | 0  |
| 102468234 | Dlk2          | EGF-like-domain, multiple 9                                                | 1  | 0  | 0  |
| 7106303   | Ehd1          | EH-domain containing 1                                                     | 6  | 0  | 1  |
| 215983062 | Ehd3          | EH-domain containing 3                                                     | 1  | 0  | 0  |
| 31981592  | Ehd4          | EH-domain containing 4                                                     | 15 | 7  | 3  |
| 31542606  | Eln           | elastin                                                                    | 0  | 1  | 1  |
| 21553119  | Emilin2       | elastin microfibril interfacier 2                                          | 0  | 1  | 0  |
| 33469055  | Emilin3       | elastin microfibril interfacier 3                                          | 0  | 0  | 1  |
| 31542602  | Elavl1        | ELAV (embryonic lethal, abnormal vision, Drosophila)-like 1 (Hu antigen R) | 3  | 13 | 14 |
| 227500281 | Etfa          | electron transferring flavoprotein, alpha polypeptide                      | 15 | 9  | 10 |
| 38142460  | Etfb          | electron transferring flavoprotein, beta polypeptide                       | 13 | 3  | 9  |
| 254588014 | Etfdh         | electron-transferring-flavoprotein dehydrogenase                           | 14 | 0  | 0  |
| 255003740 | 1200014J11Rik | ELG protein                                                                | 0  | 2  | 4  |
| 153792362 | Elk4          | ELK4, member of ETS oncogene family                                        | 0  | 1  | 0  |
| 37360977  | Erc2          | ELKS/RAB6-interacting/CAST family member 2                                 | 1  | 2  | 0  |
| 82617676  | Elmod1        | ELMO domain containing 1                                                   | 1  | 1  | 0  |
| 227908784 | Eftud1        | elongation factor Tu GTP binding domain containing 1                       | 0  | 0  | 1  |
| 158508674 | Eftud2        | elongation factor Tu GTP binding domain containing 2 isoform b             | 9  | 41 | 32 |
| 148540000 | Elovl7        | elongation of very long chain fatty acids-like 7                           | 1  | 0  | 0  |
| 33469023  | Elp3          | elongation protein 3 homolog                                               | 1  | 0  | 0  |
| 31542608  | Elp4          | elongation protein 4 homolog                                               | 0  | 1  | 0  |
| 11230770  | Eed           | embryonic ectoderm development                                             | 0  | 5  | 0  |
| 6679641   | Emd           | emerin                                                                     | 9  | 0  | 5  |
| 7305109   | Emg1          | EMG1 nucleolar protein homolog                                             | 0  | 9  | 6  |
| 27369816  | Engase        | endo-beta-N-acetylglucosaminidase                                          | 0  | 8  | 0  |

|           |          |                                                                          |    |   |    |
|-----------|----------|--------------------------------------------------------------------------|----|---|----|
| 6679647   | Endog    | endonuclease G                                                           | 0  | 1 | 0  |
| 71043968  | Eepd1    | endonuclease/exonuclease/phosphatase family domain containing 1          | 0  | 0 | 1  |
| 38348230  | Ero1lb   | endoplasmic oxidoreductase 1 beta                                        | 1  | 0 | 0  |
| 13507656  | Erap1    | endoplasmic reticulum aminopeptidase 1                                   | 2  | 0 | 0  |
| 124487057 | Ermp1    | endoplasmic reticulum metallopeptidase 1                                 | 13 | 0 | 2  |
| 19526463  | Erp29    | endoplasmic reticulum protein ERp29 precursor                            | 8  | 0 | 0  |
| 13385678  | Ergic1   | endoplasmic reticulum-golgi intermediate compartment (ERGIC) 1           | 8  | 0 | 2  |
| 10946942  | Edf1     | endothelial differentiation-related factor 1                             | 1  | 2 | 0  |
| 13385388  | Med28    | endothelial-derived gene 1                                               | 0  | 1 | 0  |
| 111185951 | Tek      | endothelial-specific receptor tyrosine kinase                            | 1  | 0 | 1  |
| 122937365 | Edn2     | endothelin 2                                                             | 1  | 0 | 0  |
| 40254536  | Ecel1    | endothelin converting enzyme-like 1                                      | 0  | 1 | 0  |
| 17933766  | Elmo1    | engulfment and cell motility 1 isoform 2                                 | 2  | 0 | 0  |
| 255683297 | Elmo3    | engulfment and cell motility 3, ced-12 homolog                           | 0  | 4 | 1  |
| 27532963  | Epc1     | enhancer of polycomb homolog 1 isoform 1                                 | 0  | 1 | 0  |
| 157042787 | Epc2     | enhancer of polycomb homolog 2                                           | 1  | 0 | 0  |
| 6679685   | Erh      | enhancer of rudimentary homolog                                          | 3  | 3 | 3  |
| 226442807 | Ezh2     | enhancer of zeste 2 isoform 1                                            | 0  | 1 | 0  |
| 6679719   | Ezh1     | enhancer of zeste homolog 1                                              | 1  | 0 | 0  |
| 294979218 | Etl4     | enhancer trap locus 4                                                    | 0  | 0 | 6  |
| 158853992 | Eno1     | enolase 1, alpha non-neuron                                              | 25 | 2 | 12 |
| 7305027   | Eno2     | enolase 2, gamma neuronal                                                | 1  | 0 | 0  |
| 7949037   | Ech1     | enoyl coenzyme A hydratase 1, peroxisomal                                | 11 | 3 | 0  |
| 225543400 | Echdc2   | enoyl Coenzyme A hydratase domain containing 2                           | 1  | 0 | 0  |
| 31980955  | Echdc3   | enoyl Coenzyme A hydratase domain containing 3                           | 1  | 0 | 0  |
| 111185907 | Evpl     | envoplakin                                                               | 4  | 4 | 5  |
| 125988414 | Eid3     | EP300 interacting inhibitor of differentiation 3                         | 1  | 0 | 0  |
| 282165729 | Epdr1    | ependymin 2                                                              | 0  | 1 | 0  |
| 47777351  | Ephb2    | Eph receptor B2                                                          | 0  | 0 | 1  |
| 226437671 | Ephb6    | Eph receptor B6                                                          | 0  | 0 | 1  |
| 6753724   | Efna5    | ephrin A5 isoform 1                                                      | 0  | 0 | 1  |
| 31542597  | Efnb2    | ephrin B2                                                                | 0  | 0 | 1  |
| 31980651  | Epha1    | ephrin receptor EphA1                                                    | 1  | 0 | 0  |
| 32484983  | Epha2    | ephrin receptor EphA2                                                    | 1  | 0 | 0  |
| 46560582  | Egfr     | epidermal growth factor receptor isoform 1                               | 4  | 0 | 0  |
| 170784834 | Eps15l1  | epidermal growth factor receptor pathway substrate 15, related isoform a | 0  | 1 | 0  |
| 21040233  | Eps8l2   | epidermal growth factor receptor pathway substrate 8-like protein 2      | 3  | 0 | 5  |
| 166706895 | Tox4     | epidermal Langerhans cell protein LCP1                                   | 0  | 6 | 0  |
| 12963667  | Npc2     | epididymal secretory protein E1                                          | 4  | 0 | 0  |
| 37537522  | Eppk1    | epiplakin 1                                                              | 7  | 0 | 5  |
| 112293275 | Epcam    | epithelial cell adhesion molecule                                        | 6  | 0 | 1  |
| 6753748   | Emp1     | epithelial membrane protein 1                                            | 0  | 0 | 1  |
| 28849887  | Esrp2    | epithelial splicing regulatory protein 2                                 | 1  | 2 | 2  |
| 30424918  | Epm2aip1 | EPM2A (laforin) interacting protein 1                                    | 0  | 1 | 0  |
| 6753762   | Ephx1    | epoxide hydrolase 1, microsomal                                          | 14 | 0 | 0  |
| 83716015  | Ephx3    | epoxide hydrolase 3                                                      | 1  | 0 | 0  |
| 10946972  | Cope     | epsilon subunit of coatomer protein complex                              | 5  | 0 | 2  |
| 30794400  | Epn3     | epsin 3                                                                  | 1  | 3 | 6  |
| 256355019 | Erlin1   | ER lipid raft associated 1                                               | 2  | 0 | 1  |
| 23956396  | Erlin2   | ER lipid raft associated 2                                               | 18 | 0 | 6  |

|           |           |                                                                                 |    |    |    |
|-----------|-----------|---------------------------------------------------------------------------------|----|----|----|
| 54607114  | Erb2ip    | Erb2 interacting protein isoform 2                                              | 0  | 0  | 2  |
| 6755100   | Pa2g4     | ErbB3-binding protein 1                                                         | 13 | 15 | 0  |
| 13384938  | Ergic3    | ERGIC and golgi 3                                                               | 3  | 0  | 0  |
| 7657067   | Ero1l     | ERO1-like                                                                       | 8  | 0  | 0  |
| 172072610 | Ermmap    | erythroblast membrane-associated protein                                        | 0  | 0  | 1  |
| 190684669 | Epb4.1    | erythrocyte protein band 4.1 isoform 3                                          | 3  | 2  | 0  |
| 54873604  | Epb4.1l1  | erythrocyte protein band 4.1-like 1 isoform a                                   | 8  | 1  | 0  |
| 312922373 | Epb4.1l2  | erythrocyte protein band 4.1-like 2                                             | 8  | 0  | 0  |
| 7305031   | Epb4.1l3  | erythrocyte protein band 4.1-like 3                                             | 0  | 0  | 1  |
| 87042272  | Epb4.1l4a | erythrocyte protein band 4.1-like 4a                                            | 0  | 0  | 1  |
| 169234799 | Epb4.1l4b | erythrocyte protein band 4.1-like 4b                                            | 0  | 0  | 1  |
| 164663872 | Epb4.1l5  | erythrocyte protein band 4.1-like 5 isoform 1                                   | 4  | 2  | 6  |
| 20070420  | D10Jhu81e | es1 protein                                                                     | 5  | 0  | 1  |
| 19526804  | Es22      | esterase 22                                                                     | 0  | 1  | 0  |
| 13937355  | Esd       | esterase D/formylglutathione hydrolase                                          | 4  | 0  | 0  |
| 157951743 | H2-Ke6    | estradiol 17 beta-dehydrogenase 8                                               | 7  | 9  | 1  |
| 16716597  | Hsd17b11  | estradiol 17-beta-dehydrogenase 11                                              | 7  | 1  | 3  |
| 112293262 | Esrra     | estrogen related receptor, alpha                                                | 0  | 4  | 1  |
| 226958367 | Esrrb     | estrogen-related receptor beta isoform 1                                        | 0  | 2  | 1  |
| 257153368 | Etaa1     | ETAA16 protein                                                                  | 1  | 1  | 0  |
| 12963539  | Ethe1     | ETHE1 protein                                                                   | 11 | 1  | 0  |
| 6681287   | Ehf       | ets homologous factor                                                           | 0  | 2  | 0  |
| 84370337  | Etv6      | ets variant 6                                                                   | 0  | 1  | 0  |
| 157951633 | Ehmt1     | euchromatic histone methyltransferase 1 isoform 4                               | 0  | 0  | 4  |
| 22219432  | Ehmt2     | euchromatic histone-lysine N-methyltransferase 2 isoform G9a long               | 0  | 4  | 4  |
| 12746442  | Eefsec    | eukaryotic elongation factor, selenocysteine-tRNA-specific                      | 2  | 7  | 0  |
| 6681275   | Eef2k     | eukaryotic elongation factor-2 kinase                                           | 0  | 0  | 1  |
| 126032329 | Eef1a1    | eukaryotic translation elongation factor 1 alpha 1                              | 18 | 21 | 15 |
| 31980922  | Eef1b2    | eukaryotic translation elongation factor 1 beta 2                               | 2  | 7  | 3  |
| 54287684  | Eef1d     | eukaryotic translation elongation factor 1 delta isoform a                      | 8  | 10 | 2  |
| 13384756  | Eef1e1    | eukaryotic translation elongation factor 1 epsilon 1                            | 0  | 1  | 0  |
| 110625979 | Eef1g     | eukaryotic translation elongation factor 1 gamma                                | 11 | 17 | 5  |
| 33859482  | Eef2      | eukaryotic translation elongation factor 2                                      | 44 | 28 | 18 |
| 22165347  | Eif1      | eukaryotic translation initiation factor 1                                      | 0  | 2  | 0  |
| 158631225 | Eif1a     | eukaryotic translation initiation factor 1A                                     | 0  | 2  | 0  |
| 31541824  | Eif1ay    | eukaryotic translation initiation factor 1A, Y-linked                           | 1  | 8  | 0  |
| 21312159  | Eif1b     | eukaryotic translation initiation factor 1B                                     | 1  | 6  | 0  |
| 166851838 | Eif2ak4   | eukaryotic translation initiation factor 2 alpha kinase 4                       | 0  | 0  | 1  |
| 13385624  | Eif2s1    | eukaryotic translation initiation factor 2, subunit 1 alpha                     | 16 | 14 | 0  |
| 14149756  | Eif2s2    | eukaryotic translation initiation factor 2, subunit 2 (beta)                    | 6  | 11 | 0  |
| 6753738   | Eif2s3x   | eukaryotic translation initiation factor 2, subunit 3, structural gene X-linked | 2  | 3  | 0  |
| 7242148   | Eif2s3y   | eukaryotic translation initiation factor 2, subunit 3, structural gene Y-linked | 6  | 6  | 0  |
| 54020676  | Eif2a     | eukaryotic translation initiation factor 2A                                     | 10 | 6  | 0  |
| 6755160   | Eif2ak2   | eukaryotic translation initiation factor 2-alpha kinase 2                       | 0  | 2  | 0  |
| 21703744  | Eif2b1    | eukaryotic translation initiation factor 2B, subunit 1                          | 1  | 0  | 0  |
| 219842353 | Eif2c2    | eukaryotic translation initiation factor 2C, 2                                  | 1  | 9  | 4  |
| 51093840  | Eif3l     | eukaryotic translation initiation factor 3 subunit 6 interacting protein        | 17 | 5  | 3  |
| 146219837 | Eif3a     | eukaryotic translation initiation factor 3, subunit 10 (theta)                  | 24 | 9  | 2  |
| 45476573  | Eif3e     | eukaryotic translation initiation factor 3, subunit 6                           | 6  | 2  | 0  |

|           |         |                                                                                                 |    |    |   |
|-----------|---------|-------------------------------------------------------------------------------------------------|----|----|---|
| 125628629 | Eif3d   | eukaryotic translation initiation factor 3, subunit 7 (zeta)                                    | 9  | 0  | 0 |
| 29789343  | Eif3b   | eukaryotic translation initiation factor 3, subunit 9                                           | 13 | 4  | 1 |
| 22203755  | Eif3c   | eukaryotic translation initiation factor 3, subunit C                                           | 22 | 3  | 0 |
| 225637531 | Eif3f   | eukaryotic translation initiation factor 3, subunit F                                           | 8  | 2  | 1 |
| 31980808  | Eif3g   | eukaryotic translation initiation factor 3, subunit G                                           | 5  | 1  | 0 |
| 18079341  | Eif3h   | eukaryotic translation initiation factor 3, subunit H                                           | 6  | 1  | 0 |
| 9055370   | Eif3i   | eukaryotic translation initiation factor 3, subunit I                                           | 11 | 4  | 1 |
| 124244040 | Eif3j   | eukaryotic translation initiation factor 3, subunit J                                           | 4  | 1  | 0 |
| 21312044  | Eif3k   | eukaryotic translation initiation factor 3, subunit K                                           | 2  | 4  | 0 |
| 21703762  | Eif3m   | eukaryotic translation initiation factor 3, subunit M                                           | 7  | 2  | 0 |
| 50838806  | Eif4g3  | eukaryotic translation initiation factor 4 gamma, 3                                             | 2  | 1  | 0 |
| 56699434  | Eif4g1  | eukaryotic translation initiation factor 4, gamma 1 isoform a                                   | 16 | 5  | 2 |
| 110630015 | Eif4g2  | eukaryotic translation initiation factor 4, gamma 2 isoform 1                                   | 3  | 0  | 1 |
| 20149756  | Eif4a3  | eukaryotic translation initiation factor 4A, isoform 3                                          | 1  | 2  | 6 |
| 21450625  | Eif4a1  | eukaryotic translation initiation factor 4A1 isoform 1                                          | 18 | 7  | 8 |
| 176865892 | Eif4a2  | eukaryotic translation initiation factor 4A2 isoform b                                          | 5  | 3  | 0 |
| 167234372 | Eif4b   | eukaryotic translation initiation factor 4B                                                     | 10 | 3  | 0 |
| 83627717  | Eif4e   | eukaryotic translation initiation factor 4E                                                     | 1  | 1  | 0 |
| 85677508  | Eif4e2  | eukaryotic translation initiation factor 4E member 2 isoform 1                                  | 1  | 0  | 1 |
| 15808988  | Eif4h   | eukaryotic translation initiation factor 4H                                                     | 6  | 4  | 1 |
| 124430541 | Eif5    | eukaryotic translation initiation factor 5                                                      | 2  | 1  | 1 |
| 262359900 | Eif5a   | eukaryotic translation initiation factor 5A                                                     | 3  | 5  | 0 |
| 29243942  | Eif5a2  | eukaryotic translation initiation factor 5A2                                                    | 2  | 1  | 1 |
| 84043961  | Eif5b   | eukaryotic translation initiation factor 5B                                                     | 9  | 11 | 0 |
| 27501448  | Eif6    | eukaryotic translation initiation factor 6                                                      | 6  | 6  | 7 |
| 124286826 | Etf1    | eukaryotic translation termination factor 1                                                     | 6  | 5  | 0 |
| 6755522   | Ecsit   | evolutionarily conserved signaling intermediate in Toll pathway                                 | 1  | 0  | 0 |
| 88853581  | Ewsr1   | Ewing sarcoma breakpoint region 1                                                               | 1  | 3  | 0 |
| 187960071 | Ercc1   | excision repair cross-complementing rodent repair deficiency, complementation group 1 isoform a | 0  | 1  | 0 |
| 31542614  | Ercc2   | excision repair cross-complementing rodent repair deficiency, complementation group 2           | 0  | 1  | 0 |
| 19526800  | Ercc3   | excision repair cross-complementing rodent repair deficiency, complementation group 3           | 0  | 2  | 0 |
| 241666402 | Ercc4   | excision repair cross-complementing rodent repair deficiency, complementation group 4           | 1  | 0  | 0 |
| 124487019 | Ercc6   | excision repair cross-complementing rodent repair deficiency, complementation group 6           | 0  | 0  | 1 |
| 21313438  | Exoc2   | exocyst complex component 2                                                                     | 0  | 0  | 1 |
| 46402177  | Exoc5   | exocyst complex component 5                                                                     | 1  | 0  | 0 |
| 247269443 | Exoc7   | exocyst complex component 7 isoform 1                                                           | 1  | 2  | 1 |
| 257796249 | Exph5   | exophilin 5                                                                                     | 1  | 0  | 0 |
| 257096005 | Exosc1  | exosome component 1                                                                             | 0  | 6  | 1 |
| 227116266 | Exosc10 | exosome component 10                                                                            | 0  | 2  | 0 |
| 21450259  | Exosc2  | exosome component 2                                                                             | 0  | 7  | 0 |
| 39930417  | Exosc3  | exosome component 3                                                                             | 0  | 2  | 0 |
| 29611663  | Exosc4  | exosome component 4                                                                             | 0  | 5  | 0 |
| 20070392  | Exosc5  | exosome component 5                                                                             | 1  | 5  | 1 |
| 30794378  | Exosc6  | exosome component 6                                                                             | 1  | 5  | 2 |
| 124487127 | Exosc7  | exosome component 7                                                                             | 1  | 3  | 0 |
| 9506981   | Exosc9  | exosome component 9                                                                             | 1  | 6  | 1 |

|           |         |                                                           |    |    |    |
|-----------|---------|-----------------------------------------------------------|----|----|----|
| 112807209 | Ext1    | exostosin 1                                               | 0  | 0  | 1  |
| 78190507  | Xpo1    | exportin 1, CRM1 homolog                                  | 4  | 1  | 9  |
| 10048438  | Xpo4    | exportin 4                                                | 1  | 0  | 0  |
| 24429570  | Xpo5    | exportin 5                                                | 2  | 0  | 2  |
| 12746422  | Xpo7    | exportin 7                                                | 0  | 4  | 0  |
| 124486686 | Xpot    | exportin, tRNA (nuclear export receptor for tRNAs)        | 0  | 0  | 1  |
| 33859650  | Esyt1   | extended synaptotagmin-like protein 1                     | 25 | 0  | 1  |
| 27734847  | F11r    | F11 receptor                                              | 4  | 0  | 0  |
| 161086971 | Capza1  | F-actin capping protein alpha-1 subunit                   | 1  | 8  | 6  |
| 126090857 | Fam120a | family with sequence similarity 120, member A             | 3  | 9  | 2  |
| 241982745 | Fam129a | family with sequence similarity 129, member A             | 10 | 0  | 1  |
| 124486785 | Fam148b | family with sequence similarity 148, member B             | 0  | 1  | 1  |
| 268370213 | Fam164c | family with sequence similarity 164, member C             | 0  | 1  | 0  |
| 28202059  | Fam171b | family with sequence similarity 171, member B             | 0  | 0  | 1  |
| 84993237  | Fam60a  | family with sequence similarity 60, member A              | 0  | 1  | 0  |
| 85701644  | Fam82a2 | family with sequence similarity 82, member A2             | 1  | 0  | 7  |
| 31560255  | Fam82b  | family with sequence similarity 82, member B              | 1  | 0  | 0  |
| 269914118 | Fam83h  | family with sequence similarity 83, member H              | 0  | 1  | 17 |
| 124487447 | Fam89a  | family with sequence similarity 89, member A              | 0  | 1  | 0  |
| 61098124  | Fam98b  | family with sequence similarity 98, member B              | 0  | 2  | 0  |
| 282721083 | Fancd2  | Fanconi anemia, complementation group D2                  | 0  | 1  | 0  |
| 255652995 | Fance   | Fanconi anemia, complementation group E                   | 0  | 1  | 0  |
| 126722700 | Fanci   | Fanconi anemia, complementation group I                   | 0  | 1  | 1  |
| 54112418  | Fancm   | Fanconi anemia, complementation group M                   | 0  | 0  | 1  |
| 84662730  | Fubp1   | far upstream element (FUSE) binding protein 1             | 5  | 17 | 0  |
| 224922832 | Fubp3   | far upstream element (FUSE) binding protein 3             | 1  | 18 | 6  |
| 19882207  | Fdps    | farnesyl diphosphate synthase                             | 12 | 0  | 0  |
| 226443053 | Fas     | Fas (TNF receptor superfamily member) isoform 1 precursor | 0  | 0  | 1  |
| 315013583 | Daxx    | Fas death domain-associated protein                       | 0  | 1  | 0  |
| 85861160  | Fastk   | Fas-activated serine/threonine kinase                     | 0  | 0  | 1  |
| 27369557  | Fastkd2 | FAST kinase domains 2                                     | 0  | 0  | 1  |
| 128485706 | Fastkd3 | FAST kinase domains 3                                     | 1  | 0  | 0  |
| 225703041 | Fastkd5 | FAST kinase domains 5                                     | 2  | 0  | 0  |
| 164664497 | My11    | fast skeletal myosin alkali light chain 1 isoform 1f      | 1  | 0  | 1  |
| 157951641 | Fat1    | FAT tumor suppressor homolog 1                            | 0  | 1  | 0  |
| 71725377  | Fat2    | FAT tumor suppressor homolog 2                            | 0  | 0  | 1  |
| 153792706 | Fat4    | FAT tumor suppressor homolog 4                            | 0  | 1  | 0  |
| 226443015 | Faah    | fatty acid amide hydrolase                                | 2  | 0  | 0  |
| 9790071   | Fads2   | fatty acid desaturase 2                                   | 5  | 0  | 4  |
| 93102409  | Fasn    | fatty acid synthase                                       | 34 | 0  | 3  |
| 100818178 | Kdm2a   | F-box and leucine-rich repeat protein 11                  | 1  | 3  | 0  |
| 161333858 | Fbxl13  | F-box and leucine-rich repeat protein 13                  | 0  | 1  | 0  |
| 153945830 | Fbxl18  | F-box and leucine-rich repeat protein 18                  | 1  | 1  | 0  |
| 40254240  | Fbxl19  | F-box and leucine-rich repeat protein 19                  | 1  | 0  | 0  |
| 30519963  | Fbxl2   | F-box and leucine-rich repeat protein 2                   | 1  | 0  | 0  |
| 111494221 | Fbxl20  | F-box and leucine-rich repeat protein 20                  | 0  | 1  | 0  |
| 124248556 | Fbxw9   | F-box and WD-40 domain protein 9                          | 0  | 0  | 1  |
| 46877055  | Fbxo3   | F-box only protein 3 isoform 1                            | 1  | 0  | 1  |
| 244790104 | Fbxo10  | F-box protein 10                                          | 3  | 0  | 0  |
| 124486644 | Fbxo11  | F-box protein 11                                          | 0  | 1  | 0  |
| 28201989  | Fbxo28  | F-box protein 28                                          | 0  | 1  | 1  |
| 158517904 | Fbxo31  | F-box protein 31                                          | 0  | 1  | 0  |
| 13384764  | Fbxo36  | F-box protein 36                                          | 0  | 1  | 0  |

|           |         |                                                         |    |     |    |
|-----------|---------|---------------------------------------------------------|----|-----|----|
| 160333600 | Fbxo38  | F-box protein 38                                        | 1  | 1   | 0  |
| 47564092  | Fbxo41  | F-box protein 41                                        | 1  | 0   | 0  |
| 124487431 | Fbxo47  | F-box protein 47                                        | 0  | 1   | 0  |
| 169790797 | Fcgbp   | Fc fragment of IgG binding protein                      | 38 | 2   | 0  |
| 255683303 | Fcho1   | FCH domain only 1                                       | 0  | 1   | 0  |
| 27734132  | Fem1c   | fem-1 homolog c                                         | 0  | 1   | 1  |
| 124487185 | Frmpd1  | FERM and PDZ domain containing 1                        | 0  | 1   | 1  |
| 13385676  | Frmf8   | FERM domain containing 8                                | 1  | 0   | 0  |
| 229892332 | Farp2   | FERM, RhoGEF and pleckstrin domain protein 2            | 0  | 0   | 1  |
| 110349752 | Farp1   | FERMRhoGEF (Arhgef) and pleckstrin domain protein 1     | 0  | 0   | 4  |
| 6679765   | Fdx1    | ferredoxin 1                                            | 3  | 0   | 0  |
| 6753912   | Fth1    | ferritin heavy chain 1                                  | 4  | 0   | 0  |
| 114326466 | Ftl1    | ferritin light chain 1                                  | 1  | 1   | 0  |
| 130485277 | Ftl2    | ferritin light chain 2                                  | 3  | 4   | 0  |
| 20452466  | Fech    | ferrochelataase                                         | 0  | 2   | 0  |
| 31982373  | Fbl     | fibrillarin                                             | 3  | 17  | 15 |
| 7106313   | Fgf10   | fibroblast growth factor 10                             | 1  | 0   | 0  |
| 6753854   | Fgf5    | fibroblast growth factor 5                              | 0  | 1   | 0  |
| 261599078 | Fgf8    | fibroblast growth factor 8                              | 1  | 1   | 1  |
| 29244340  | Frs2    | fibroblast growth factor receptor substrate 2           | 0  | 0   | 1  |
| 116063550 | Fsd2    | fibronectin type III and SPRY domain containing 2       | 0  | 0   | 1  |
| 168693628 | Fbln1   | fibulin 1                                               | 1  | 1   | 0  |
| 124517704 | Fbln2   | fibulin 2 isoform a                                     | 0  | 1   | 1  |
| 145966915 | Flnb    | filamin B, beta                                         | 73 | 107 | 39 |
| 253795477 | Fblim1  | filamin binding LIM protein 1                           | 0  | 0   | 1  |
| 124487139 | Flna    | filamin C, gamma                                        | 9  | 20  | 7  |
| 125347376 | Flna    | filamin, alpha                                          | 22 | 46  | 1  |
| 227330598 | Fip111  | FIP1 like 1 isoform 2                                   | 0  | 8   | 1  |
| 227330586 | Mtor    | FK506 binding protein 12-rapamycin associated protein 1 | 1  | 0   | 0  |
| 6679803   | Fkbp1a  | FK506 binding protein 1A, 12kDa                         | 1  | 0   | 0  |
| 261824055 | Fkbp2   | FK506 binding protein 2, 13kDa                          | 6  | 4   | 0  |
| 7305061   | Fkbp3   | FK506 binding protein 3, 25kDa                          | 3  | 7   | 0  |
| 6753884   | Fkbp5   | FK506 binding protein 5                                 | 18 | 3   | 2  |
| 6753882   | Fkbp4   | FK506 binding protein 52                                | 9  | 1   | 0  |
| 313851007 | Fkbp8   | FK506 binding protein 8 isoform a                       | 2  | 0   | 2  |
| 172072617 | Fkbp9   | FK506 binding protein 9                                 | 2  | 0   | 0  |
| 46048490  | Fen1    | flap structure specific endonuclease 1                  | 3  | 7   | 0  |
| 31542819  | Fmo2    | flavin-containing monooxygenase 2                       | 0  | 1   | 0  |
| 11528490  | Flii    | flightless I homolog                                    | 4  | 27  | 1  |
| 6679809   | Flot1   | flotillin 1                                             | 0  | 0   | 1  |
| 94536791  | Flot2   | flotillin 2 isoform 2                                   | 0  | 1   | 2  |
| 160333168 | Fiz1    | Flt3 interacting zinc finger protein 1                  | 0  | 1   | 0  |
| 255003742 | Flywch1 | FLYWCH-type zinc finger 1                               | 1  | 0   | 0  |
| 122937353 | Flt3    | FMS-like tyrosine kinase 3                              | 0  | 0   | 1  |
| 6679813   | Flt4    | fms-related tyrosine kinase 4                           | 0  | 1   | 0  |
| 28827784  | Folr4   | folate receptor 4 (delta) isoform 2                     | 0  | 0   | 1  |
| 57527848  | Fstl4   | follistatin-like 4                                      | 1  | 0   | 0  |
| 34304111  | Foxe1   | forkhead box E1                                         | 1  | 0   | 0  |
| 226693376 | Foxj1   | forkhead box J1                                         | 0  | 1   | 0  |
| 82546826  | Foxk1   | forkhead box K1                                         | 0  | 1   | 0  |
| 238018071 | Foxk2   | forkhead box K2                                         | 0  | 1   | 0  |
| 91598891  | Foxn4   | forkhead box N4                                         | 1  | 0   | 0  |
| 167900466 | Fnbp11  | formin binding protein 1-like isoform 2                 | 1  | 2   | 0  |

|           |               |                                                            |    |    |   |
|-----------|---------------|------------------------------------------------------------|----|----|---|
| 9055218   | Prpf40a       | formin binding protein 3                                   | 1  | 28 | 9 |
| 9055220   | Fnbp4         | formin binding protein 4                                   | 0  | 1  | 0 |
| 37674240  | Fhod3         | formin homology 2 domain containing 3                      | 0  | 1  | 0 |
| 114052809 | 2610204M08Rik | formin, inverted                                           | 4  | 0  | 2 |
| 38708163  | Fmnl3         | formin-like 3 protein                                      | 2  | 0  | 5 |
| 124378048 | Fmnl2         | formin-like domain containing protein MAN                  | 1  | 0  | 1 |
| 7305065   | Fpr1          | formyl peptide receptor 1                                  | 0  | 0  | 1 |
| 226823218 | Fydd1         | forty-two-three domain containing 1 isoform 1              | 0  | 0  | 2 |
| 116517340 | Fhl1          | four and a half LIM domains 1 isoform 2                    | 0  | 0  | 1 |
| 130488506 | Fhl3          | four and a half LIM domains 3                              | 1  | 0  | 0 |
| 47059108  | Fjx1          | four jointed box 1                                         | 0  | 0  | 1 |
| 225543434 | 4932438A13Rik | fragile site-associated protein                            | 2  | 1  | 0 |
| 51036613  | Fmr1          | fragile X mental retardation protein 1                     | 3  | 2  | 3 |
| 163954941 | Fxr1          | fragile X mental retardation-related protein 1 isoform 1   | 4  | 9  | 3 |
| 83921589  | Fxr2          | fragile X mental retardation-related protein 2             | 3  | 4  | 1 |
| 126157515 | Fras1         | Fras1 protein                                              | 1  | 0  | 0 |
| 71051607  | Frem2         | Fras1 related extracellular matrix protein 2               | 4  | 0  | 0 |
| 6679863   | Fxn           | frataxin                                                   | 3  | 0  | 0 |
| 270341379 | Ffar2         | free fatty acid receptor 2                                 | 0  | 0  | 1 |
| 6755476   | Frzb          | frizzled-related protein                                   | 1  | 0  | 0 |
| 253970463 | Fn3krp        | fructosamine 3 kinase related protein                      | 2  | 0  | 0 |
| 293597569 | Aldoa         | fructose-bisphosphate aldolase A                           | 22 | 12 | 1 |
| 225543552 | Frg1          | FSHD region gene 1                                         | 0  | 6  | 0 |
| 13384672  | Ftsj3         | FtsJ homolog 3                                             | 1  | 0  | 7 |
| 41281971  | Fuk           | fucokinase isoform 2                                       | 1  | 0  | 0 |
| 31560444  | Fut8          | fucosyltransferase 8                                       | 2  | 0  | 0 |
| 226823367 | Fh1           | fumarate hydratase 1                                       | 14 | 1  | 0 |
| 12963697  | Fahd1         | fumarylacetoacetate hydrolase domain containing 1          | 5  | 0  | 0 |
| 29366814  | Fahd2a        | fumarylacetoacetate hydrolase domain containing 2A         | 2  | 0  | 0 |
| 21312526  | Fundc1        | FUN14 domain containing 1                                  | 0  | 1  | 0 |
| 262050556 | Fundc2        | FUN14 domain containing 2                                  | 2  | 1  | 0 |
| 157841282 | Gm7348        | functional Smad suppressor element on chromosome 18        | 1  | 0  | 0 |
| 122937372 | Fusip1        | FUS interacting protein (serine-arginine rich) 1 isoform 1 | 0  | 5  | 6 |
| 16554572  | Fxyd2         | FXYD domain-containing ion transport regulator 2 isoform a | 2  | 0  | 0 |
| 227116298 | Frk           | fyn-related kinase                                         | 5  | 0  | 0 |
| 85719309  | Fgd3          | FYVE, RhoGEF and PH domain containing 3                    | 0  | 1  | 0 |
| 56699430  | Fgd5          | FYVE, RhoGEF and PH domain containing 5                    | 1  | 0  | 0 |
| 160708005 | Fgd6          | FYVE, RhoGEF and PH domain containing 6                    | 0  | 0  | 1 |
| 170650599 | Gfm1          | G elongation factor, mitochondrial 1                       | 11 | 0  | 2 |
| 125991228 | Gpkow         | G patch domain and KOW motifs                              | 0  | 1  | 0 |
| 13385692  | Gpatch1       | G patch domain containing 1                                | 0  | 0  | 1 |
| 295424137 | Gps1          | G protein pathway suppressor 1                             | 2  | 0  | 0 |
| 226246675 | Gpr110        | G protein-coupled receptor 110                             | 1  | 0  | 0 |
| 300934759 | Gpr124        | G protein-coupled receptor 124                             | 0  | 1  | 0 |
| 241896916 | Gpr125        | G protein-coupled receptor 125 isoform 1                   | 0  | 0  | 1 |
| 52350563  | Gpr158        | G protein-coupled receptor 158                             | 0  | 1  | 0 |
| 71725394  | Gpr17         | G protein-coupled receptor 17                              | 0  | 1  | 0 |
| 98986316  | Gpr177        | G protein-coupled receptor 177                             | 2  | 0  | 0 |
| 124487045 | Gpr179        | G protein-coupled receptor 179                             | 0  | 1  | 0 |
| 27734082  | Gpr20         | G protein-coupled receptor 20                              | 0  | 0  | 1 |



|           |               |                                                                   |    |    |    |
|-----------|---------------|-------------------------------------------------------------------|----|----|----|
| 295293102 | Gpr22         | G protein-coupled receptor 22                                     | 1  | 0  | 0  |
| 27734158  | Gpr26         | G protein-coupled receptor 26                                     | 0  | 0  | 1  |
| 160298211 | Gpr37         | G protein-coupled receptor 37 precursor                           | 1  | 0  | 0  |
| 6753528   | Gpr44         | G protein-coupled receptor 44                                     | 0  | 0  | 1  |
| 124430559 | Lgr4          | G protein-coupled receptor 48                                     | 0  | 1  | 0  |
| 312032400 | Gpr56         | G protein-coupled receptor 56                                     | 2  | 0  | 1  |
| 159032059 | Grk5          | G protein-coupled receptor kinase 5                               | 2  | 0  | 0  |
| 116517297 | Git2          | G protein-coupled receptor kinase interacting ArfGAP 2 isoform 2  | 0  | 1  | 0  |
| 51921285  | Git1          | G protein-coupled receptor kinase-interactor 1                    | 0  | 0  | 2  |
| 148762954 | Casr          | G protein-coupled receptor, family C, group 2, member A           | 1  | 0  | 0  |
| 225543465 | Gprc5a        | G protein-coupled receptor, family C, group 5, member A           | 2  | 2  | 2  |
| 160333231 | Gprc5c        | G protein-coupled receptor, family C, group 5, member C isoform b | 3  | 0  | 6  |
| 84000009  | Gprin1        | G protein-regulated inducer of neurite outgrowth 1                | 0  | 1  | 0  |
| 194018533 | Gspt1         | G1 to S phase transition 1 isoform 1                              | 4  | 0  | 0  |
| 34328119  | Gabpa         | GA repeat binding protein, alpha                                  | 0  | 6  | 1  |
| 46575942  | Gabpb1        | GA repeat binding protein, beta 1 isoform a                       | 0  | 1  | 0  |
| 93102413  | Galk1         | galactokinase 1                                                   | 3  | 0  | 0  |
| 30424748  | Galk2         | galactokinase 2                                                   | 1  | 0  | 0  |
| 302370951 | Galns         | galactosamine (N-acetyl)-6-sulfate sulfatase precursor            | 2  | 0  | 0  |
| 85986609  | Gm6086        | galactose-3-O-sulfotransferase 2-like                             | 0  | 0  | 1  |
| 93102411  | Galc          | galactosylceramidase                                              | 1  | 0  | 2  |
| 30794256  | Galp          | galanin-like peptide precursor                                    | 0  | 1  | 0  |
| 225543163 | Lgals3        | galectin 3                                                        | 5  | 0  | 1  |
| 22122485  | Gabrp         | gamma-aminobutyric acid (GABA) A receptor, pi                     | 0  | 1  | 0  |
| 124487263 | Gabbr2        | gamma-aminobutyric acid (GABA) B receptor, 2                      | 0  | 1  | 0  |
| 18485502  | Bbox1         | gamma-butyrobetaine dioxygenase                                   | 1  | 0  | 0  |
| 9790009   | Ggcx          | gamma-glutamyl carboxylase                                        | 0  | 1  | 0  |
| 224994186 | Ggt7          | gamma-glutamyltransferase 7                                       | 0  | 0  | 1  |
| 6753992   | Gja1          | gap junction protein, alpha 1                                     | 0  | 1  | 0  |
| 6680011   | Gjb2          | gap junction protein, beta 2                                      | 0  | 1  | 0  |
| 116174744 | Gjd3          | gap junction protein, delta 3                                     | 0  | 1  | 0  |
| 13878199  | Gsdmc         | gasdermin C                                                       | 0  | 0  | 1  |
| 269954702 | Gsdmc2        | gasdermin C2                                                      | 19 | 19 | 32 |
| 226053537 | Gsdmc3        | gasdermin C3                                                      | 2  | 1  | 6  |
| 6679951   | Gata3         | GATA binding protein 3                                            | 0  | 0  | 2  |
| 157266271 | Glp1          | GATA like protein-1                                               | 1  | 1  | 0  |
| 161086973 | Gatad1        | GATA zinc finger domain containing 1                              | 0  | 1  | 0  |
| 112807186 | Gcn111        | GCN1 general control of amino-acid synthesis 1-like 1             | 6  | 1  | 3  |
| 226437608 | 1810007M14Rik | GC-rich sequence DNA-binding factor candidate                     | 0  | 4  | 5  |
| 22122523  | Gmnds         | GDP-mannose 4,6-dehydratase                                       | 5  | 0  | 0  |
| 19526884  | Gmppa         | GDP-mannose pyrophosphorylase A                                   | 1  | 0  | 0  |
| 29244556  | Gmppb         | GDP-mannose pyrophosphorylase B                                   | 1  | 0  | 0  |
| 28916693  | Gsn           | gelsolin                                                          | 14 | 8  | 7  |
| 110227379 | Capg          | gelsolin-like capping protein isoform 2                           | 9  | 1  | 3  |
| 262263303 | Gemin5        | gem (nuclear organelle) associated protein 5                      | 0  | 0  | 1  |
| 225543576 | Gtl3          | gene trap locus 3                                                 | 0  | 7  | 0  |
| 87299617  | Gtf2a2        | general transcription factor II A, 2                              | 0  | 1  | 0  |
| 21312660  | Gtf2e1        | general transcription factor II E, polypeptide 1 (alpha subunit)  | 0  | 1  | 0  |

|           |          |                                                                        |    |    |   |
|-----------|----------|------------------------------------------------------------------------|----|----|---|
| 268838784 | Gtf2e2   | general transcription factor II E, polypeptide 2 (beta subunit)        | 0  | 1  | 0 |
| 188035919 | Gtf2h1   | general transcription factor II H, polypeptide 1                       | 0  | 2  | 0 |
| 6754094   | Gtf2h4   | general transcription factor II H, polypeptide 4                       | 0  | 2  | 0 |
| 125625345 | Gtf2ird1 | general transcription factor II I repeat domain-containing 1 isoform a | 1  | 0  | 1 |
| 20270031  | Gtf2f1   | general transcription factor IIF, polypeptide 1                        | 1  | 1  | 0 |
| 39930425  | Gtf2f2   | general transcription factor IIF, polypeptide 2                        | 0  | 1  | 0 |
| 31088894  | Gtf2h3   | general transcription factor IIH, polypeptide 3                        | 0  | 1  | 0 |
| 46402235  | Gtf3c1   | general transcription factor III C 1                                   | 0  | 4  | 0 |
| 124001578 | Gtf2i    | general transcription factor Ili isoform 1                             | 2  | 16 | 0 |
| 22507323  | Gtf3c5   | general transcription factor III polypeptide 5                         | 0  | 2  | 0 |
| 260436918 | Gtf3c4   | general transcription factor IIIC 4                                    | 0  | 11 | 2 |
| 85861229  | Gtf3c2   | general transcription factor IIIC, polypeptide 2, beta                 | 0  | 3  | 0 |
| 75677510  | Gtf3c3   | general transcription factor IIIC, polypeptide 3                       | 0  | 7  | 1 |
| 269973917 | Gphn     | gephyrin                                                               | 2  | 0  | 0 |
| 160333071 | Gmcl1    | germ cell-less                                                         | 0  | 0  | 2 |
| 85861226  | Grtp1    | GH regulated TBC protein 1                                             | 1  | 0  | 0 |
| 124487231 | Gan      | giant axonal neuropathy                                                | 0  | 0  | 1 |
| 9055336   | Gipc1    | GIPC PDZ domain containing family, member 1                            | 1  | 6  | 0 |
| 8394258   | Gipc2    | GIPC PDZ domain containing family, member 2                            | 5  | 11 | 1 |
| 58037369  | Gle1     | GLE1 RNA export mediator                                               | 0  | 0  | 3 |
| 90186273  | Gli1     | GLI family zinc finger 1                                               | 0  | 1  | 0 |
| 188528613 | Gmfb     | glia maturation factor, beta                                           | 0  | 2  | 0 |
| 85861222  | Gmfg     | glia maturation factor, gamma isoform 1                                | 1  | 0  | 0 |
| 7110601   | Gdnf     | glial cell line derived neurotrophic factor                            | 0  | 1  | 0 |
| 6753976   | Gfra1    | glial cell line derived neurotrophic factor family receptor alpha 1    | 0  | 0  | 1 |
| 160298168 | Gbas     | glioblastoma amplified                                                 | 3  | 0  | 1 |
| 113866026 | Glis3    | GLIS family zinc finger 3                                              | 1  | 1  | 0 |
| 239985605 | Glmn     | glomulin, FKBP associated protein isoform a                            | 0  | 0  | 1 |
| 121247453 | Nr3c1    | glucocorticoid receptor                                                | 0  | 0  | 1 |
| 75677442  | Grif1    | glucocorticoid receptor DNA binding factor 1                           | 1  | 0  | 0 |
| 29789239  | Gns      | glucosamine (N-acetyl)-6-sulfatase                                     | 3  | 0  | 0 |
| 9506761   | Gnpat1   | glucosamine-phosphate N-acetyltransferase 1                            | 0  | 1  | 0 |
| 124430729 | Gcnt3    | glucosaminyl (N-acetyl) transferase 3, mucin type                      | 0  | 0  | 1 |
| 254553458 | Gpi1     | glucose phosphate isomerase 1                                          | 7  | 0  | 2 |
| 227330582 | G6pd2    | glucose-6-phosphate dehydrogenase 2                                    | 4  | 0  | 0 |
| 6996917   | G6pdx    | glucose-6-phosphate dehydrogenase X-linked                             | 5  | 0  | 0 |
| 116734815 | Gba      | glucosidase, beta, acid isoform 1                                      | 1  | 0  | 0 |
| 6754098   | Gusb     | glucuronidase, beta                                                    | 4  | 0  | 0 |
| 6680027   | Glud1    | glutamate dehydrogenase 1                                              | 23 | 0  | 0 |
| 160298209 | Got1     | glutamate oxaloacetate transaminase 1, soluble                         | 1  | 0  | 0 |
| 6754036   | Got2     | glutamate oxaloacetate transaminase 2, mitochondrial                   | 30 | 6  | 0 |
| 304766513 | Grik4    | glutamate receptor KA1 precursor                                       | 0  | 0  | 1 |
| 163792196 | Gria3    | glutamate receptor, ionotropic, AMPA3 precursor                        | 0  | 0  | 1 |
| 160298215 | Grik5    | glutamate receptor, ionotropic, kainate 5 (gamma 2) precursor          | 0  | 0  | 1 |
| 41680705  | Grin2a   | glutamate receptor, ionotropic, NMDA2A (epsilon 1)                     | 0  | 0  | 1 |
| 117168299 | Grin2b   | glutamate receptor, ionotropic, NMDA2B (epsilon 2) precursor           | 1  | 0  | 0 |
| 144922606 | Grin2d   | glutamate receptor, ionotropic, NMDA2D (epsilon 4)                     | 0  | 1  | 1 |
| 258645114 | Grin1a   | glutamate receptor, ionotropic, N-methyl D-aspartate-like 1A           | 0  | 1  | 0 |
| 116812904 | Grm8     | glutamate receptor, metabotropic 8                                     | 1  | 0  | 0 |

|           |         |                                                               |    |   |    |
|-----------|---------|---------------------------------------------------------------|----|---|----|
| 163937861 | Grwd1   | glutamate-rich WD repeat containing 1                         | 1  | 5 | 0  |
| 164607135 | Gls     | glutaminase isoform 2                                         | 21 | 0 | 0  |
| 7305085   | Gfpt1   | glutamine fructose-6-phosphate transaminase 1                 | 1  | 0 | 0  |
| 166295183 | Qrich1  | glutamine-rich 1                                              | 0  | 1 | 0  |
| 269954679 | Qars    | glutaminyl-tRNA synthetase                                    | 8  | 1 | 1  |
| 6679653   | Enpep   | glutamyl aminopeptidase                                       | 0  | 1 | 0  |
| 82617575  | Eprs    | glutamyl-prolyl-tRNA synthetase                               | 1  | 3 | 1  |
| 31981269  | Glrx3   | glutaredoxin 3                                                | 1  | 0 | 0  |
| 21312153  | Glrx5   | glutaredoxin 5                                                | 4  | 0 | 0  |
| 113680425 | Gcdh    | glutaryl-Coenzyme A dehydrogenase                             | 2  | 1 | 0  |
| 84871986  | Gpx1    | glutathione peroxidase 1                                      | 11 | 1 | 9  |
| 90903235  | Gpx4    | glutathione peroxidase 4 isoform 1 precursor                  | 0  | 5 | 1  |
| 160298213 | Gsr     | glutathione reductase precursor                               | 1  | 0 | 0  |
| 21313138  | Gstk1   | glutathione S-transferase kappa 1                             | 3  | 5 | 0  |
| 6754084   | Gstm1   | glutathione S-transferase mu 1                                | 14 | 0 | 7  |
| 6680121   | Gstm2   | glutathione S-transferase mu 2                                | 7  | 2 | 8  |
| 6754086   | Gstm5   | glutathione S-transferase mu 5                                | 1  | 1 | 2  |
| 113679874 | Gstm7   | glutathione S-transferase mu 7                                | 2  | 0 | 2  |
| 6754090   | Gsto1   | glutathione S-transferase omega 1                             | 8  | 0 | 4  |
| 313151238 | Gsto2   | glutathione S-transferase omega 2                             | 1  | 0 | 1  |
| 116325999 | Gsta3   | glutathione S-transferase, alpha 3                            | 4  | 0 | 2  |
| 160298217 | Gsta4   | glutathione S-transferase, alpha 4                            | 3  | 0 | 3  |
| 10092608  | Gstp1   | glutathione S-transferase, pi 1                               | 3  | 2 | 3  |
| 32401425  | Gstp2   | glutathione S-transferase, pi 2                               | 8  | 2 | 2  |
| 160298219 | Gstt1   | glutathione S-transferase, theta 1                            | 1  | 0 | 0  |
| 158081796 | Gstt2   | glutathione S-transferase, theta 2                            | 2  | 0 | 1  |
| 21536248  | Gstt3   | glutathione S-transferase, theta 3                            | 2  | 0 | 5  |
| 6680117   | Gss     | glutathione synthetase                                        | 3  | 0 | 0  |
| 6754092   | Gstz1   | glutathione transferase zeta 1 (maleylacetoacetate isomerase) | 6  | 0 | 0  |
| 6679939   | Gapdhs  | glyceraldehyde-3-phosphate dehydrogenase, spermatogenic       | 1  | 2 | 2  |
| 28893497  | Gk5     | glycerol kinase 5 (putative)                                  | 0  | 1 | 0  |
| 6753966   | Gpd1    | glycerol-3-phosphate dehydrogenase 1 (soluble)                | 9  | 0 | 5  |
| 257467604 | Gpd1l   | glycerol-3-phosphate dehydrogenase 1-like                     | 5  | 0 | 0  |
| 224922806 | Gpd2    | glycerol-3-phosphate dehydrogenase 2, mitochondrial           | 32 | 1 | 12 |
| 160298207 | Gnpat   | glyceronephosphate O-acyltransferase                          | 2  | 0 | 0  |
| 23956140  | Gdpd1   | glycerophosphodiester phosphodiesterase domain containing 1   | 3  | 0 | 0  |
| 110431346 | Gdpd3   | glycerophosphodiester phosphodiesterase domain containing 3   | 3  | 0 | 0  |
| 52345431  | Gdpd5   | glycerophosphodiester phosphodiesterase domain containing 5   | 0  | 1 | 0  |
| 240120119 | Gcat    | glycine C-acetyltransferase isoform a                         | 10 | 0 | 0  |
| 13386066  | Gcsh    | glycine cleavage system protein H (aminomethyl carrier)       | 1  | 0 | 0  |
| 22122359  | Glyat   | glycine-N-acyltransferase                                     | 1  | 0 | 1  |
| 9790077   | Gsk3b   | glycogen synthase kinase 3 beta                               | 1  | 4 | 0  |
| 31560404  | Gltp    | glycolipid transfer protein                                   | 1  | 0 | 0  |
| 50345976  | Gp1bb   | glycoprotein 1b, beta polypeptide isoform 1                   | 1  | 1 | 0  |
| 226342960 | Tecr    | glycoprotein, synaptic 2 isoform 1                            | 9  | 2 | 9  |
| 147901175 | Glt1d1  | glycosyltransferase 1 domain containing 1                     | 0  | 1 | 0  |
| 260166652 | Glt28d2 | glycosyltransferase 28 domain containing 1-like               | 0  | 0 | 1  |
| 27369952  | Gtdc1   | glycosyltransferase-like domain containing 1                  | 1  | 0 | 0  |
| 93102417  | Gars    | glycyl-tRNA synthetase                                        | 11 | 1 | 0  |
| 165932333 | Glo1    | glyoxalase 1                                                  | 6  | 0 | 0  |

|           |               |                                                                       |    |   |    |
|-----------|---------------|-----------------------------------------------------------------------|----|---|----|
| 255003777 | Glod4         | glyoxalase domain containing 4                                        | 10 | 0 | 0  |
| 17933768  | Grhpr         | glyoxylate reductase/hydroxypyruvate reductase                        | 5  | 0 | 0  |
| 7710028   | Gpc1          | glypican 1                                                            | 0  | 0 | 1  |
| 6806917   | Gm2a          | GM2 ganglioside activator protein                                     | 4  | 0 | 0  |
| 117959930 | Gnas          | GNAS complex locus XLas                                               | 6  | 3 | 10 |
| 6677905   | Glg1          | golgi apparatus protein 1                                             | 31 | 1 | 3  |
| 313151170 | Gopc          | golgi associated PDZ and coiled-coil motif containing                 | 1  | 0 | 0  |
| 22122347  | Gga1          | golgi associated, gamma adaptin ear containing, ARF binding protein 1 | 2  | 0 | 0  |
| 30794192  | Golga1        | golgi autoantigen, golgin subfamily a, 1                              | 3  | 0 | 0  |
| 124378042 | Golga2        | golgi autoantigen, golgin subfamily a, 2 isoform a                    | 6  | 0 | 1  |
| 31982330  | Golga3        | Golgi autoantigen, golgin subfamily a, 3                              | 0  | 1 | 1  |
| 20127150  | Golga4        | golgi autoantigen, golgin subfamily a, 4                              | 0  | 0 | 1  |
| 312222675 | Golga5        | golgi autoantigen, golgin subfamily a, 5                              | 15 | 0 | 0  |
| 268370067 | Gcc1          | Golgi coiled coil protein 1                                           | 1  | 0 | 1  |
| 78190502  | Golm1         | golgi membrane protein 1                                              | 4  | 0 | 0  |
| 14140240  | Golph3        | golgi phosphoprotein 3                                                | 2  | 0 | 0  |
| 295054284 | Golph3l       | golgi phosphoprotein 3-like                                           | 2  | 0 | 0  |
| 30350202  | Gorasp1       | Golgi reassembly stacking protein 1                                   | 0  | 1 | 0  |
| 224967109 | Gorasp2       | golgi reassembly stacking protein 2                                   | 3  | 0 | 0  |
| 31542904  | Gosr1         | golgi SNAP receptor complex member 1                                  | 3  | 1 | 1  |
| 24528553  | Gosr2         | golgi SNAP receptor complex member 2                                  | 2  | 0 | 0  |
| 52138536  | Gbf1          | golgi-specific brefeldin A-resistance factor 1                        | 2  | 0 | 0  |
| 161016845 | 4921537P18Rik | gonad specific ankyrin repeat protein isoform 1                       | 0  | 0 | 1  |
| 6754046   | Gpaal1        | GPI anchor attachment protein 1                                       | 2  | 1 | 0  |
| 19527346  | Gpsm3         | G-protein signalling modulator 3 (AGS3-like, C. elegans)              | 0  | 0 | 1  |
| 238637263 | Grhl1         | grainyhead-like 1 isoform 2                                           | 0  | 1 | 0  |
| 329663552 | Gramd4        | GRAM domain containing 4                                              | 1  | 0 | 1  |
| 80861474  | Gcap14        | granule cell antiserum positive 14 isoform 1                          | 0  | 0 | 1  |
| 224967126 | Grn           | granulin                                                              | 0  | 0 | 2  |
| 159032014 | Gigyf2        | GRB10 interacting GYF protein 2 isoform a                             | 1  | 1 | 1  |
| 148596982 | Grsf1         | G-rich RNA sequence binding factor 1 isoform 1                        | 3  | 2 | 0  |
| 85701616  | Gcom1         | GRINL1A complex locus                                                 | 0  | 0 | 5  |
| 61742806  | Gcc2          | GRIP and coiled-coil domain-containing 2                              | 8  | 0 | 0  |
| 21312546  | Fam162a       | growth and transformation-dependent protein                           | 7  | 2 | 3  |
| 6678980   | Gadd45b       | growth arrest and DNA-damage-inducible 45 beta                        | 1  | 0 | 0  |
| 269315840 | Gadd45gip1    | growth arrest and DNA-damage-inducible, gamma interacting protein 1   | 2  | 2 | 1  |
| 6679941   | Gas1          | growth arrest specific 1                                              | 0  | 0 | 1  |
| 41529818  | Gdf6          | growth differentiation factor 6                                       | 1  | 0 | 0  |
| 312283736 | Ghitm         | growth hormone inducible transmembrane protein                        | 2  | 0 | 1  |
| 145966853 | BC030307      | Grp94 neighboring nucleotidase isoform 3                              | 0  | 0 | 1  |
| 13277394  | Grpel1        | GrpE-like 1, mitochondrial                                            | 8  | 1 | 0  |
| 18921210  | Gsx2          | GS homeobox 2                                                         | 1  | 0 | 0  |
| 37059812  | Frat1         | GSK-3 binding protein FRAT1                                           | 1  | 0 | 0  |
| 160298187 | Gem           | GTP binding protein (gene overexpressed in skeletal muscle)           | 0  | 0 | 1  |
| 225543388 | Gtbbp2        | GTP binding protein 2 isoform 1                                       | 0  | 0 | 1  |
| 31560110  | Gtbbp4        | GTP binding protein 4                                                 | 0  | 0 | 5  |
| 188528646 | Mtg1          | GTP binding protein 7 (putative)                                      | 0  | 1 | 0  |
| 40254514  | Gapvd1        | GTPase activating protein and VPS9 domains 1                          | 0  | 1 | 0  |
| 163310721 | Garnl1        | GTPase activating RANGAP domain-like 1 isoform 2                      | 1  | 0 | 2  |
| 28416442  | Gimap4        | GTPase, IMAP family member 4 isoform a                                | 0  | 1 | 0  |
| 226693391 | Gtbbp8        | GTP-binding protein 8 isoform 1                                       | 0  | 4 | 1  |

|           |          |                                                                           |    |    |    |
|-----------|----------|---------------------------------------------------------------------------|----|----|----|
| 6753960   | Gda      | guanine deaminase                                                         | 0  | 1  | 0  |
| 85861218  | Gmps     | guanine monophosphate synthetase                                          | 10 | 0  | 0  |
| 41054806  | Gnai2    | guanine nucleotide binding protein (G protein), alpha inhibiting 2        | 3  | 1  | 9  |
| 33563256  | Gnai3    | guanine nucleotide binding protein (G protein), alpha inhibiting 3        | 9  | 2  | 10 |
| 6680047   | Gnb2l1   | guanine nucleotide binding protein (G protein), beta polypeptide 2 like 1 | 11 | 17 | 5  |
| 294774564 | Gng12    | guanine nucleotide binding protein (G protein), gamma 12                  | 4  | 4  | 4  |
| 84579906  | Gng5     | guanine nucleotide binding protein (G protein), gamma 5 subunit           | 1  | 0  | 0  |
| 6754004   | Gna11    | guanine nucleotide binding protein, alpha 11                              | 5  | 0  | 0  |
| 89001109  | Gna13    | guanine nucleotide binding protein, alpha 13                              | 4  | 0  | 0  |
| 160298199 | Gna14    | guanine nucleotide binding protein, alpha 14                              | 2  | 0  | 1  |
| 84662745  | Gnaq     | guanine nucleotide binding protein, alpha q polypeptide                   | 3  | 0  | 0  |
| 122937361 | Gnai1    | guanine nucleotide binding protein, related sequence 1                    | 0  | 0  | 1  |
| 240120093 | Gni2     | guanine nucleotide binding protein-like 2 (nucleolar)                     | 0  | 0  | 2  |
| 229608938 | Gnb1     | guanine nucleotide-binding protein, beta-1 subunit                        | 5  | 2  | 5  |
| 13937391  | Gnb2     | guanine nucleotide-binding protein, beta-2 subunit                        | 11 | 8  | 12 |
| 33859560  | Gdi1     | guanosine diphosphate (GDP) dissociation inhibitor 1                      | 11 | 0  | 0  |
| 116089273 | Gdi2     | guanosine diphosphate (GDP) dissociation inhibitor 2                      | 21 | 6  | 0  |
| 6753950   | Gbp2     | guanylate binding protein 2                                               | 1  | 0  | 0  |
| 194688157 | Gucy2d   | guanylate cyclase 2d                                                      | 0  | 1  | 0  |
| 22122571  | Guca1b   | guanylate cyclase activator 1B                                            | 0  | 1  | 0  |
| 91064876  | Gbp5     | guanylate-binding protein 5                                               | 0  | 0  | 1  |
| 27370038  | Guf1     | GUF1 GTPase homolog                                                       | 1  | 0  | 0  |
| 31560697  | H1f0     | H1 histone family, member 0                                               | 2  | 5  | 7  |
| 257196238 | H1fnt    | H1 histone family, member N, testis-specific                              | 2  | 0  | 1  |
| 19923865  | H1foo    | H1 histone family, member O, oocyte-specific                              | 1  | 0  | 0  |
| 7106331   | H2afx    | H2A histone family, member X                                              | 2  | 3  | 6  |
| 283945575 | H2afy    | H2A histone family, member Y isoform 1                                    | 0  | 1  | 19 |
| 7949045   | H2afz    | H2A histone family, member Z                                              | 4  | 5  | 6  |
| 6680159   | H3f3a    | H3 histone, family 3A                                                     | 1  | 1  | 1  |
| 61098067  | Hes2     | hairy and enhancer of split 2                                             | 1  | 0  | 0  |
| 21312204  | Hdhd3    | haloacid dehalogenase-like hydrolase domain containing 3                  | 4  | 0  | 0  |
| 254911005 | Ush1c    | harmonin isoform a1                                                       | 0  | 1  | 0  |
| 6677819   | Rras     | Harvey rat sarcoma oncogene, subgroup R                                   | 2  | 1  | 2  |
| 7106329   | Gsg2     | haspin                                                                    | 0  | 0  | 1  |
| 122056689 | Crebzf   | HCF-binding transcription factor Zhangfei                                 | 1  | 0  | 0  |
| 6754160   | Hax1     | HCLS1 associated X-1                                                      | 1  | 0  | 1  |
| 160948577 | Hs1bp3   | HCLS1 binding protein 3                                                   | 2  | 0  | 0  |
| 75832031  | Hddc2    | HD domain containing 2                                                    | 1  | 0  | 0  |
| 21312092  | Hddc3    | HD domain containing 3                                                    | 1  | 0  | 0  |
| 84370019  | Heca     | headcase homolog                                                          | 0  | 1  | 0  |
| 38505263  | Heatr5a  | HEAT repeat containing 5A                                                 | 0  | 0  | 1  |
| 124487157 | Heatr5b  | HEAT repeat containing 5B                                                 | 1  | 0  | 1  |
| 114145505 | Hsph1    | heat shock 105kD                                                          | 14 | 1  | 0  |
| 82880662  | Hspa14   | heat shock 70kDa protein 14 isoform 1                                     | 0  | 4  | 0  |
| 124339829 | Hspa1a   | heat shock 70kDa protein 1A                                               | 17 | 18 | 11 |
| 124339826 | Hspa1b   | heat shock 70kDa protein 1B                                               | 1  | 1  | 1  |
| 124339838 | Hspa1l   | heat shock 70kDa protein 1-like                                           | 15 | 11 | 10 |
| 88196788  | Tmem132a | heat shock 70kDa protein 5 binding protein 1                              | 1  | 0  | 0  |
| 21311873  | Hsbp1    | heat shock factor binding protein 1                                       | 0  | 0  | 2  |

|           |           |                                                                                                     |    |    |    |
|-----------|-----------|-----------------------------------------------------------------------------------------------------|----|----|----|
| 6680309   | Hspe1     | heat shock protein 1 (chaperonin 10)                                                                | 6  | 0  | 0  |
| 183396771 | Hspd1     | heat shock protein 1 (chaperonin)                                                                   | 42 | 17 | 19 |
| 6754254   | Hsp90aa1  | heat shock protein 1, alpha                                                                         | 48 | 19 | 19 |
| 40556608  | Hsp90ab1  | heat shock protein 1, beta                                                                          | 26 | 7  | 11 |
| 50345978  | Hspa2     | heat shock protein 2                                                                                | 14 | 13 | 7  |
| 112293266 | Hspa4     | heat shock protein 4                                                                                | 29 | 14 | 2  |
| 40254361  | Hspa4l    | heat shock protein 4 like                                                                           | 5  | 1  | 0  |
| 254540168 | Hspa5     | heat shock protein 5                                                                                | 39 | 11 | 11 |
| 30089677  | Hspa13    | heat shock protein 70 family, member 13                                                             | 2  | 0  | 0  |
| 31981690  | Hspa8     | heat shock protein 8                                                                                | 19 | 24 | 22 |
| 162461907 | Hspa9     | heat shock protein 9                                                                                | 33 | 14 | 19 |
| 40807498  | Hrsp12    | heat-responsive protein 12                                                                          | 6  | 0  | 0  |
| 257196144 | Herc1     | hect (homologous to the E6-AP (UBE3A) carboxyl terminus) domain and RCC1 (CHC1)-like domain (RLD) 1 | 1  | 0  | 0  |
| 134288898 | Herc2     | hect (homologous to the E6-AP (UBE3A) carboxyl terminus) domain and RCC1 (CHC1)-like domain (RLD) 2 | 2  | 1  | 1  |
| 32451488  | Herc4     | hect domain and RLD 4                                                                               | 0  | 0  | 1  |
| 146231996 | Huwe1     | HECT, UBA and WWE domain containing 1                                                               | 1  | 0  | 0  |
| 124249064 | Hhip1     | hedgehog interacting protein-like 1                                                                 | 0  | 0  | 1  |
| 160358774 | Hhip      | Hedgehog-interacting protein precursor                                                              | 1  | 0  | 0  |
| 19111156  | Dhx30     | HELG                                                                                                | 1  | 2  | 0  |
| 165932362 | Helb      | helicase (DNA) B                                                                                    | 0  | 0  | 1  |
| 50355943  | Helz      | helicase with zinc finger domain                                                                    | 1  | 0  | 1  |
| 12232371  | Hells     | helicase, lymphoid specific                                                                         | 0  | 8  | 10 |
| 6680237   | Hn1       | hematological and neurological expressed sequence 1                                                 | 0  | 1  | 0  |
| 225007593 | Hmox2     | heme oxygenase (decycling) 2                                                                        | 13 | 0  | 1  |
| 17647499  | Hbb-b2    | hemoglobin, beta adult minor chain                                                                  | 0  | 1  | 0  |
| 6754164   | Hc        | hemolytic complement                                                                                | 1  | 0  | 0  |
| 124487077 | Hs3st5    | heparan sulfate (glucosamine) 3-O-sulfotransferase 5                                                | 0  | 0  | 1  |
| 60223081  | Hs3st6    | heparan sulfate (glucosamine) 3-O-sulfotransferase 6                                                | 1  | 0  | 0  |
| 225690608 | Hs6st1    | heparan sulfate 6-O-sulfotransferase 1                                                              | 0  | 1  | 0  |
| 124486753 | Hs3st2    | heparan sulfate D-glucosaminyl 3-O-sulfotransferase 2                                               | 0  | 0  | 1  |
| 157042776 | Ndst4     | heparan sulfate N-deacetylase/N-sulfotransferase 4                                                  | 1  | 1  | 1  |
| 22779887  | Hpse      | heparanase                                                                                          | 0  | 0  | 1  |
| 124486931 | Hpse2     | heparanase 2                                                                                        | 0  | 2  | 0  |
| 46575916  | Hnf4a     | hepatic nuclear factor 4, alpha                                                                     | 0  | 1  | 0  |
| 237820655 | Hbxip     | hepatitis B virus x interacting protein                                                             | 1  | 0  | 0  |
| 170172522 | Hgf       | hepatocyte growth factor                                                                            | 0  | 1  | 0  |
| 188497724 | Hdgf      | hepatoma-derived growth factor                                                                      | 7  | 12 | 0  |
| 34787412  | Hdgfrp3   | hepatoma-derived growth factor, related protein 3                                                   | 1  | 5  | 0  |
| 6680201   | Hdgfrp2   | hepatoma-derived growth factor-related protein 2                                                    | 2  | 6  | 2  |
| 268607542 | Hps5      | Hermansky-Pudlak syndrome 5 isoform 1                                                               | 0  | 1  | 0  |
| 254039596 | Isca2     | HESB like domain containing 1 isoform 1                                                             | 5  | 0  | 0  |
| 21312189  | Isca1     | HESB like domain containing 2                                                                       | 1  | 0  | 0  |
| 171846285 | Hp1bp3    | heterochromatin protein 1, binding protein 3 isoform 1                                              | 0  | 24 | 13 |
| 146260280 | Hnrnpab   | heterogeneous nuclear ribonucleoprotein A/B isoform 1                                               | 8  | 16 | 10 |
| 226443091 | Hnrnpa0   | heterogeneous nuclear ribonucleoprotein A0                                                          | 4  | 13 | 6  |
| 85060507  | Hnrnpa1   | heterogeneous nuclear ribonucleoprotein A1 isoform a                                                | 12 | 28 | 19 |
| 109134362 | Hnrnpa2b1 | heterogeneous nuclear ribonucleoprotein A2/B1 isoform 2                                             | 15 | 35 | 31 |
| 157277969 | Hnrnpa3   | heterogeneous nuclear ribonucleoprotein A3 isoform a                                                | 1  | 26 | 21 |
| 283436180 | Hnrnpc    | heterogeneous nuclear ribonucleoprotein C                                                           | 5  | 12 | 16 |
| 116256518 | Hnrnpd    | heterogeneous nuclear ribonucleoprotein D isoform c                                                 | 3  | 16 | 5  |
| 148664250 | Hnrpdl    | heterogeneous nuclear ribonucleoprotein D-like                                                      | 1  | 9  | 7  |

|           |             |                                                                 |    |    |    |
|-----------|-------------|-----------------------------------------------------------------|----|----|----|
| 261878599 | Hnrnpf      | heterogeneous nuclear ribonucleoprotein F                       | 16 | 15 | 14 |
| 10946928  | HnrnpH1     | heterogeneous nuclear ribonucleoprotein H1                      | 1  | 8  | 10 |
| 9845253   | HnrnpH2     | heterogeneous nuclear ribonucleoprotein H2                      | 4  | 8  | 14 |
| 119637823 | HnrnpH3     | heterogeneous nuclear ribonucleoprotein H3                      | 0  | 3  | 8  |
| 13384620  | Hnrnpk      | heterogeneous nuclear ribonucleoprotein K                       | 16 | 24 | 20 |
| 183980004 | HnrnpL      | heterogeneous nuclear ribonucleoprotein L                       | 6  | 33 | 22 |
| 110347535 | HnrnpL-like | heterogeneous nuclear ribonucleoprotein L-like                  | 5  | 21 | 3  |
| 158186704 | HnrnpM      | heterogeneous nuclear ribonucleoprotein M isoform a             | 8  | 16 | 40 |
| 33859724  | HnrnpR      | heterogeneous nuclear ribonucleoprotein R                       | 5  | 23 | 10 |
| 160333923 | HnrnpU      | heterogeneous nuclear ribonucleoprotein U                       | 27 | 48 | 29 |
| 21450323  | HnrnpU1     | heterogeneous nuclear ribonucleoprotein U-like 1 isoform 1      | 3  | 1  | 4  |
| 124487099 | HnrnpU2     | heterogeneous nuclear ribonucleoprotein U-like 2                | 3  | 23 | 28 |
| 20270289  | Hexim1      | hexamethylene bis-acetamide inducible 1                         | 1  | 0  | 0  |
| 225735584 | Hk1         | hexokinase 1 isoform HK1-sb                                     | 35 | 37 | 37 |
| 7305143   | Hk2         | hexokinase 2                                                    | 6  | 9  | 7  |
| 329755312 | Hk3         | hexokinase 3                                                    | 0  | 1  | 0  |
| 21703836  | Hkdc1       | hexokinase domain containing 1                                  | 0  | 1  | 1  |
| 67514549  | Hexa        | hexosaminidase A                                                | 0  | 3  | 0  |
| 6754186   | Hexb        | hexosaminidase B                                                | 3  | 13 | 0  |
| 31982147  | H6pd        | hexose-6-phosphate dehydrogenase                                | 15 | 1  | 0  |
| 226874952 | Hgs         | HGF-regulated tyrosine kinase substrate isoform 2               | 3  | 1  | 1  |
| 9789977   | Higd1a      | HIG1 domain family, member 1A                                   | 0  | 0  | 1  |
| 19527028  | Hdlbp       | high density lipoprotein binding protein                        | 14 | 9  | 2  |
| 15022805  | Hmg20a      | high mobility group 20A                                         | 0  | 2  | 1  |
| 262331515 | Hmga1       | high mobility group AT-hook 1                                   | 0  | 7  | 2  |
| 6754210   | Hmga2       | high mobility group AT-hook 2                                   | 0  | 8  | 6  |
| 6754208   | Hmgb1       | high mobility group box 1                                       | 1  | 15 | 2  |
| 6680229   | Hmgb2       | high mobility group box 2                                       | 7  | 19 | 5  |
| 6680231   | Hmgb3       | high mobility group box 3                                       | 0  | 5  | 0  |
| 270132746 | Hbp1        | high mobility group box transcription factor 1 isoform 1        | 0  | 0  | 1  |
| 41406074  | Hmgn1       | high mobility group nucleosomal binding domain 1                | 0  | 3  | 2  |
| 8393534   | Hmgn2       | high mobility group nucleosomal binding domain 2                | 0  | 5  | 1  |
| 21313298  | Hmgn3       | high mobility group nucleosomal binding domain 3 isoform Hmgn3a | 0  | 1  | 0  |
| 7949055   | Hpcal1      | hippocalcin-like 1                                              | 5  | 2  | 0  |
| 33468857  | Hint1       | histidine triad nucleotide binding protein 1                    | 4  | 0  | 0  |
| 110625719 | Hint2       | histidine triad nucleotide binding protein 2                    | 3  | 0  | 0  |
| 21312256  | Dcps        | histidine triad protein member 5                                | 11 | 0  | 0  |
| 18079343  | Hars2       | histidyl-tRNA synthetase-like                                   | 2  | 0  | 0  |
| 227116337 | H13         | histocompatibility 13 isoform 2                                 | 3  | 0  | 0  |
| 294997253 | H2-BI       | histocompatibility 2, blastocyst                                | 1  | 0  | 0  |
| 29244030  | H2-M10.4    | histocompatibility 2, M region locus 10.4                       | 1  | 0  | 0  |
| 6754148   | H2-T23      | histocompatibility 2, T region locus 23                         | 1  | 0  | 0  |
| 28076885  | Hat1        | histone acetyltransferase 1                                     | 1  | 0  | 0  |
| 52426778  | Hira        | histone cell cycle regulation defective homolog A               | 0  | 3  | 1  |
| 282154803 | Nfu1        | histone cell cycle regulation defective interacting protein 5   | 6  | 0  | 0  |
| 21426823  | Hist1h1a    | histone cluster 1, H1a                                          | 2  | 8  | 4  |
| 21426893  | Hist1h1b    | histone cluster 1, H1b                                          | 3  | 8  | 11 |
| 9845257   | Hist1h1c    | histone cluster 1, H1c                                          | 1  | 5  | 2  |
| 254588110 | Hist1h1d    | histone cluster 1, H1d                                          | 2  | 4  | 4  |
| 13430890  | Hist1h1e    | histone cluster 1, H1e                                          | 6  | 17 | 13 |
| 30061327  | Hist1h2ah   | histone cluster 1, H2ah                                         | 5  | 8  | 17 |

|           |           |                                                                |    |    |    |
|-----------|-----------|----------------------------------------------------------------|----|----|----|
| 30061389  | Hist1h2bl | histone cluster 1, H2bl                                        | 7  | 10 | 23 |
| 7305139   | Hist1h3f  | histone cluster 1, H3f                                         | 1  | 2  | 5  |
| 30061345  | Hist1h3i  | histone cluster 1, H3i                                         | 1  | 2  | 7  |
| 119433657 | Hist2h2ab | histone cluster 2, H2ab                                        | 0  | 0  | 1  |
| 30089710  | Hist2h2ac | histone cluster 2, H2ac                                        | 0  | 1  | 4  |
| 30061401  | Hist2h3c1 | histone cluster 2, H3c1 isoform 1                              | 4  | 7  | 12 |
| 21361209  | Hist2h4   | histone cluster 2, H4                                          | 11 | 15 | 24 |
| 13386452  | Hist3h2ba | histone cluster 3, H2ba                                        | 0  | 1  | 2  |
| 6680193   | Hdac1     | histone deacetylase 1                                          | 5  | 7  | 6  |
| 259089444 | Hdac10    | histone deacetylase 10                                         | 0  | 1  | 0  |
| 87162464  | Hdac2     | histone deacetylase 2                                          | 2  | 13 | 5  |
| 89257352  | Hdac3     | histone deacetylase 3                                          | 0  | 1  | 0  |
| 194353999 | Hdac6     | histone deacetylase 6                                          | 0  | 5  | 0  |
| 23956212  | Htatsf1   | HIV TAT specific factor 1                                      | 1  | 3  | 0  |
| 312261233 | Bat2      | HLA-B associated transcript 2                                  | 1  | 0  | 0  |
| 30519896  | Bat5      | HLA-B associated transcript 5                                  | 1  | 0  | 0  |
| 9790069   | Bat1a     | HLA-B-associated transcript 1A                                 | 6  | 12 | 7  |
| 33147082  | Bat3      | HLA-B-associated transcript 3                                  | 4  | 0  | 0  |
| 30794254  | Hmgxb4    | HMG box domain containing 4                                    | 0  | 1  | 0  |
| 213417775 | Raly      | hnRNP-associated with lethal yellow short isoform              | 2  | 7  | 14 |
| 6754232   | Hoxa5     | homeo box A5                                                   | 0  | 1  | 0  |
| 160358780 | Hoxb5     | homeo box B5                                                   | 0  | 1  | 0  |
| 88014652  | Hoxb7     | homeo box B7                                                   | 0  | 0  | 1  |
| 21362265  | Hoxb8     | homeo box B8                                                   | 0  | 1  | 0  |
| 158508520 | Hoxd4     | homeo box D4                                                   | 0  | 1  | 0  |
| 154800435 | Hoxc4     | homeobox C4                                                    | 0  | 0  | 1  |
| 31542626  | Hmbox1    | homeobox containing 1                                          | 0  | 1  | 0  |
| 227330557 | Meis2     | homeobox protein Meis2 isoform 1                               | 0  | 2  | 0  |
| 161333817 | Hipk4     | homeodomain interacting protein kinase 4                       | 0  | 0  | 1  |
| 171846263 | Homer1    | homer homolog 1 isoform S                                      | 1  | 0  | 0  |
| 22003856  | Hook1     | hook homolog 1                                                 | 0  | 0  | 1  |
| 46559745  | Hook3     | hook homolog 3                                                 | 0  | 1  | 0  |
| 87239972  | Lipe      | hormone-sensitive lipase isoform 1                             | 1  | 0  | 0  |
| 124487041 | Hcfc2     | host cell factor 2                                             | 0  | 1  | 1  |
| 34328130  | Hcfc1     | host cell factor C1                                            | 0  | 27 | 0  |
| 32451500  | Hcfc1r1   | host cell factor C1 regulator 1                                | 0  | 1  | 1  |
| 254281222 | Htra2     | HtrA serine peptidase 2                                        | 6  | 0  | 0  |
| 117938312 | Hivep1    | human immunodeficiency virus type I enhancer binding protein 1 | 1  | 0  | 0  |
| 85861241  | Hivep2    | human immunodeficiency virus type I enhancer binding protein 2 | 1  | 0  | 0  |
| 124107625 | Hivep3    | human immunodeficiency virus type I enhancer binding protein 3 | 0  | 1  | 1  |
| 255308928 | Hip1r     | huntingtin interacting protein 1 related                       | 0  | 4  | 2  |
| 9055244   | Prpf40b   | huntington yeast partner C                                     | 3  | 2  | 0  |
| 15042971  | Hapln2    | hyaluronan and proteoglycan link protein 2                     | 1  | 0  | 0  |
| 31982256  | Hapln3    | hyaluronan and proteoglycan link protein 3 precursor           | 0  | 1  | 0  |
| 226693396 | Hmmr      | hyaluronan mediated motility receptor (RHAMM)                  | 1  | 0  | 0  |
| 116812879 | Hyal4     | hyaluronoglucosaminidase 4                                     | 1  | 1  | 0  |
| 125660448 | Hyal6     | hyaluronoglucosaminidase 6                                     | 1  | 0  | 0  |
| 46361984  | Hydin     | hydrocephalus inducing                                         | 1  | 1  | 0  |
| 157168326 | Atp12a    | hydrogen/potassium-exchanging ATPase 12A                       | 4  | 0  | 3  |
| 110225337 | Atp4a     | hydrogen/potassium-exchanging ATPase 4A                        | 2  | 0  | 1  |
| 6754156   | Hao1      | hydroxyacid oxidase 1                                          | 0  | 1  | 0  |



|           |               |                                                           |    |    |   |
|-----------|---------------|-----------------------------------------------------------|----|----|---|
| 6188838   | Hsd17b10      | hydroxyacyl-Coenzyme A dehydrogenase type II              | 16 | 15 | 8 |
| 227499240 | Hagh          | hydroxyacylglutathione hydrolase isoform 1 precursor      | 3  | 0  | 0 |
| 159110463 | Hmbs          | hydroxymethylbilane synthase isoform 1                    | 3  | 0  | 0 |
| 9789991   | Hsd17b12      | hydroxysteroid (17-beta) dehydrogenase 12                 | 8  | 0  | 5 |
| 254553342 | Hsd17b13      | hydroxysteroid (17-beta) dehydrogenase 13 isoform 2       | 2  | 0  | 0 |
| 31982273  | Hsd17b4       | hydroxysteroid (17-beta) dehydrogenase 4                  | 24 | 25 | 3 |
| 30424792  | Hsd1          | hydroxysteroid dehydrogenase like 1                       | 2  | 0  | 0 |
| 125656150 | Hsd12         | hydroxysteroid dehydrogenase like 2                       | 11 | 4  | 0 |
| 70887767  | Hic2          | hypermethylated in cancer 2                               | 2  | 1  | 1 |
| 22122445  | Cdc73         | hyperparathyroidism 2 homolog                             | 0  | 16 | 0 |
| 6680189   | Hcn2          | hyperpolarization-activated, cyclic nucleotide-gated K+ 2 | 1  | 0  | 0 |
| 94369765  | EG668353      | hypothetical protein                                      | 1  | 0  | 0 |
| 94388081  | LOC668374     | hypothetical protein                                      | 0  | 0  | 1 |
| 149263159 | EG666385      | hypothetical protein                                      | 0  | 1  | 0 |
| 149257764 | B230311B06Rik | hypothetical protein                                      | 1  | 0  | 0 |
| 94400612  | EG629432      | hypothetical protein                                      | 1  | 0  | 0 |
| 309267832 | LOC668936     | hypothetical protein                                      | 0  | 0  | 1 |
| 149253637 | LOC100044229  | hypothetical protein                                      | 1  | 0  | 0 |
| 149256018 | LOC100039020  | hypothetical protein                                      | 0  | 1  | 0 |
| 149271566 | LOC100044382  | hypothetical protein                                      | 0  | 1  | 0 |
| 309267071 | LOC100039129  | hypothetical protein                                      | 0  | 1  | 0 |
| 149259146 | LOC100044525  | hypothetical protein                                      | 0  | 1  | 1 |
| 309269480 | 1700120B22Rik | hypothetical protein                                      | 0  | 1  | 1 |
| 149254708 | LOC100044759  | hypothetical protein                                      | 1  | 0  | 0 |
| 149258953 | LOC100039496  | hypothetical protein                                      | 0  | 1  | 0 |
| 149234131 | LOC100039524  | hypothetical protein                                      | 1  | 0  | 1 |
| 149274307 | LOC100044826  | hypothetical protein                                      | 0  | 1  | 0 |
| 149254721 | LOC100044904  | hypothetical protein                                      | 1  | 0  | 0 |
| 149274024 | LOC100039738  | hypothetical protein                                      | 0  | 0  | 1 |
| 309269024 | LOC100039757  | hypothetical protein                                      | 1  | 0  | 0 |
| 149266595 | LOC100039816  | hypothetical protein                                      | 1  | 0  | 0 |
| 149263478 | LOC100039892  | hypothetical protein                                      | 0  | 1  | 0 |
| 149254730 | LOC100045100  | hypothetical protein                                      | 0  | 1  | 0 |
| 149272056 | LOC100045328  | hypothetical protein                                      | 0  | 1  | 0 |
| 309268753 | 9430025M13Rik | hypothetical protein                                      | 0  | 0  | 1 |
| 149269651 | LOC100040202  | hypothetical protein                                      | 0  | 1  | 0 |
| 149257604 | LOC100040457  | hypothetical protein                                      | 0  | 0  | 1 |
| 149250350 | LOC100045469  | hypothetical protein                                      | 1  | 0  | 1 |
| 149253860 | LOC100040278  | hypothetical protein                                      | 1  | 1  | 0 |
| 149251991 | LOC100040368  | hypothetical protein                                      | 0  | 0  | 1 |
| 149264800 | LOC100040377  | hypothetical protein                                      | 0  | 0  | 1 |
| 149267040 | LOC100045635  | hypothetical protein                                      | 0  | 1  | 0 |
| 149251694 | LOC100045718  | hypothetical protein                                      | 1  | 0  | 0 |
| 149269892 | LOC100046071  | hypothetical protein                                      | 0  | 1  | 0 |
| 149257295 | LOC100040970  | hypothetical protein                                      | 1  | 1  | 1 |
| 149267770 | LOC100046098  | hypothetical protein                                      | 0  | 1  | 0 |
| 149254055 | LOC100041049  | hypothetical protein                                      | 0  | 0  | 1 |
| 149262461 | LOC100041125  | hypothetical protein                                      | 0  | 0  | 1 |
| 149250949 | LOC100046270  | hypothetical protein                                      | 1  | 0  | 0 |
| 149248914 | LOC100041244  | hypothetical protein                                      | 1  | 0  | 0 |
| 149261900 | LOC676691     | hypothetical protein                                      | 1  | 0  | 0 |

|           |               |                      |   |   |   |
|-----------|---------------|----------------------|---|---|---|
| 149255138 | LOC100041292  | hypothetical protein | 0 | 0 | 1 |
| 149254313 | LOC100046490  | hypothetical protein | 0 | 1 | 0 |
| 309272245 | LOC671564     | hypothetical protein | 1 | 0 | 0 |
| 149252421 | LOC100041535  | hypothetical protein | 0 | 0 | 1 |
| 149233720 | LOC100046811  | hypothetical protein | 0 | 0 | 1 |
| 149249285 | LOC100041900  | hypothetical protein | 1 | 0 | 1 |
| 149259263 | LOC672594     | hypothetical protein | 0 | 0 | 1 |
| 149260484 | LOC100046993  | hypothetical protein | 0 | 1 | 0 |
| 254553412 | C130039O16Rik | hypothetical protein | 0 | 3 | 1 |
| 149271298 | EG385346      | hypothetical protein | 1 | 0 | 0 |
| 149250434 | LOC670507     | hypothetical protein | 0 | 1 | 0 |
| 149263073 | LOC100047152  | hypothetical protein | 0 | 0 | 1 |
| 149270430 | LOC100042193  | hypothetical protein | 0 | 0 | 1 |
| 149264434 | LOC380850     | hypothetical protein | 0 | 1 | 0 |
| 149257964 | LOC100047292  | hypothetical protein | 1 | 0 | 0 |
| 309272601 | LOC672511     | hypothetical protein | 0 | 1 | 1 |
| 149252672 | EG666183      | hypothetical protein | 0 | 1 | 0 |
| 149266095 | AU040096      | hypothetical protein | 1 | 0 | 0 |
| 149260062 | LOC100041622  | hypothetical protein | 0 | 1 | 1 |
| 149253076 | LOC100044128  | hypothetical protein | 0 | 1 | 0 |
| 149240814 | LOC100047366  | hypothetical protein | 0 | 0 | 1 |
| 149266085 | LOC100047444  | hypothetical protein | 1 | 0 | 0 |
| 149251805 | LOC100047452  | hypothetical protein | 0 | 1 | 0 |
| 149256026 | LOC100042680  | hypothetical protein | 1 | 0 | 0 |
| 149264357 | LOC674779     | hypothetical protein | 1 | 0 | 1 |
| 149263125 | LOC100047799  | hypothetical protein | 1 | 0 | 0 |
| 149258017 | LOC100047822  | hypothetical protein | 0 | 1 | 0 |
| 149249169 | LOC100047398  | hypothetical protein | 1 | 0 | 0 |
| 149254158 | LOC100042571  | hypothetical protein | 0 | 1 | 0 |
| 149263140 | LOC673593     | hypothetical protein | 0 | 1 | 0 |
| 149234299 | LOC100042745  | hypothetical protein | 0 | 1 | 0 |
| 149262540 | LOC100042500  | hypothetical protein | 0 | 1 | 0 |
| 149253546 | LOC100042957  | hypothetical protein | 0 | 0 | 1 |
| 149257449 | LOC100048074  | hypothetical protein | 1 | 0 | 0 |
| 149269145 | LOC100048111  | hypothetical protein | 1 | 0 | 0 |
| 149249307 | LOC100042629  | hypothetical protein | 1 | 0 | 0 |
| 149265667 | LOC668482     | hypothetical protein | 1 | 1 | 0 |
| 149241159 | LOC100048181  | hypothetical protein | 0 | 0 | 1 |
| 149258083 | LOC100048226  | hypothetical protein | 1 | 0 | 0 |
| 149258101 | LOC100048330  | hypothetical protein | 0 | 0 | 1 |
| 149255726 | EG640142      | hypothetical protein | 1 | 0 | 0 |
| 149255279 | EG640370      | hypothetical protein | 0 | 1 | 1 |
| 149269466 | LOC100048353  | hypothetical protein | 1 | 0 | 0 |
| 149269468 | LOC100048358  | hypothetical protein | 1 | 0 | 0 |
| 149249572 | LOC100048442  | hypothetical protein | 1 | 0 | 0 |
| 149249650 | EG329521      | hypothetical protein | 0 | 2 | 0 |
| 149249713 | A530010F05Rik | hypothetical protein | 0 | 0 | 1 |
| 149262913 | LOC100043531  | hypothetical protein | 1 | 0 | 0 |
| 149249726 | LOC100048696  | hypothetical protein | 1 | 0 | 0 |
| 149265865 | LOC100043821  | hypothetical protein | 2 | 0 | 1 |
| 149265875 | LOC100043831  | hypothetical protein | 0 | 0 | 1 |
| 149260402 | LOC100043812  | hypothetical protein | 1 | 0 | 0 |

|           |                   |                      |   |   |   |
|-----------|-------------------|----------------------|---|---|---|
| 149250207 | LOC100043839      | hypothetical protein | 1 | 0 | 0 |
| 149260341 | LOC665840         | hypothetical protein | 1 | 0 | 0 |
| 307548930 | Gm221             | hypothetical protein | 1 | 0 | 0 |
| 253314482 | 4732474O15Rik     | hypothetical protein | 0 | 1 | 0 |
| 268831712 | LOC242627         | hypothetical protein | 1 | 0 | 0 |
| 82904428  | EG233075          | hypothetical protein | 1 | 0 | 1 |
| 256574776 | E030011K20Rik     | hypothetical protein | 1 | 0 | 0 |
| 83027669  | Gm872             | hypothetical protein | 0 | 0 | 1 |
| 51766932  | EG432676          | hypothetical protein | 1 | 0 | 0 |
| 149270270 | EG433216          | hypothetical protein | 0 | 0 | 1 |
| 82922589  | EG434394          | hypothetical protein | 0 | 0 | 1 |
| 309263699 | Gm318             | hypothetical protein | 0 | 1 | 0 |
| 82995190  | EG545226          | hypothetical protein | 2 | 2 | 2 |
| 94392820  | ENSMUSG0000045946 | hypothetical protein | 1 | 0 | 0 |
| 94374968  | EG624049          | hypothetical protein | 1 | 0 | 0 |
| 82900352  | LOC624698         | hypothetical protein | 1 | 0 | 0 |
| 293629305 | EG626058          | hypothetical protein | 0 | 1 | 1 |
| 94383737  | EG626231          | hypothetical protein | 1 | 0 | 0 |
| 309269577 | EG626858          | hypothetical protein | 0 | 0 | 1 |
| 82949769  | LOC626683         | hypothetical protein | 0 | 1 | 0 |
| 309266992 | EG627311          | hypothetical protein | 0 | 0 | 1 |
| 256223290 | EG628705          | hypothetical protein | 0 | 1 | 0 |
| 294774587 | EG628870          | hypothetical protein | 1 | 0 | 0 |
| 82880756  | LOC621495         | hypothetical protein | 1 | 0 | 0 |
| 82932654  | EG629739          | hypothetical protein | 0 | 1 | 0 |
| 251823944 | AU041133          | hypothetical protein | 1 | 0 | 0 |
| 309262519 | LOC631217         | hypothetical protein | 0 | 1 | 0 |
| 149246458 | LOC631924         | hypothetical protein | 0 | 1 | 0 |
| 149262457 | LOC629960         | hypothetical protein | 1 | 2 | 1 |
| 82953379  | EG620119          | hypothetical protein | 1 | 1 | 1 |
| 269315863 | LOC634429         | hypothetical protein | 0 | 0 | 1 |
| 94370054  | LOC634494         | hypothetical protein | 1 | 0 | 0 |
| 149264516 | LOC634601         | hypothetical protein | 1 | 0 | 0 |
| 83022023  | LOC634880         | hypothetical protein | 0 | 1 | 0 |
| 149266697 | I830127L07Rik     | hypothetical protein | 0 | 0 | 1 |
| 149267099 | Gm920             | hypothetical protein | 1 | 0 | 1 |
| 149264576 | LOC625662         | hypothetical protein | 0 | 0 | 1 |
| 82802581  | EG620863          | hypothetical protein | 1 | 0 | 0 |
| 149251085 | LOC639578         | hypothetical protein | 0 | 1 | 0 |
| 82997285  | EG637748          | hypothetical protein | 1 | 0 | 1 |
| 82994583  | EG621988          | hypothetical protein | 0 | 1 | 0 |
| 149262665 | A830035A12Rik     | hypothetical protein | 0 | 0 | 1 |
| 149261734 | LOC633367         | hypothetical protein | 1 | 0 | 0 |
| 94370048  | LOC633716         | hypothetical protein | 0 | 0 | 1 |
| 82906788  | LOC637329         | hypothetical protein | 0 | 0 | 1 |
| 149254346 | LOC638038         | hypothetical protein | 1 | 0 | 0 |
| 94366216  | LOC433415         | hypothetical protein | 1 | 0 | 0 |
| 94406261  | E030044B06Rik     | hypothetical protein | 1 | 0 | 0 |
| 94381514  | LOC674339         | hypothetical protein | 0 | 1 | 0 |
| 94398377  | LOC674503         | hypothetical protein | 0 | 1 | 0 |
| 94375796  | LOC667386         | hypothetical protein | 1 | 0 | 1 |

|           |                |                                          |   |   |   |
|-----------|----------------|------------------------------------------|---|---|---|
| 149252924 | LOC674677      | hypothetical protein                     | 0 | 0 | 1 |
| 94388268  | EG665429       | hypothetical protein                     | 1 | 0 | 0 |
| 309270559 | EG631797       | hypothetical protein                     | 0 | 0 | 1 |
| 94364689  | LOC674913      | hypothetical protein                     | 0 | 0 | 1 |
| 149259427 | EG665756       | hypothetical protein                     | 1 | 0 | 0 |
| 94380678  | LOC675231      | hypothetical protein                     | 1 | 0 | 0 |
| 94363265  | EG638995       | hypothetical protein                     | 1 | 0 | 0 |
| 149240684 | EG634331       | hypothetical protein                     | 0 | 1 | 0 |
| 94384162  | LOC675422      | hypothetical protein                     | 0 | 0 | 1 |
| 94370102  | LOC668078      | hypothetical protein                     | 1 | 0 | 0 |
| 94374983  | EG666266       | hypothetical protein                     | 1 | 0 | 0 |
| 94383687  | EG666340       | hypothetical protein                     | 1 | 0 | 0 |
| 94375021  | EG666527       | hypothetical protein                     | 0 | 1 | 1 |
| 94387971  | EG666625       | hypothetical protein                     | 1 | 0 | 0 |
| 262399402 | EG639025       | hypothetical protein                     | 0 | 1 | 0 |
| 94395353  | EG666856       | hypothetical protein                     | 0 | 1 | 1 |
| 262050614 | 4930407110Rik  | hypothetical protein                     | 0 | 0 | 1 |
| 149249792 | LOC667106      | hypothetical protein                     | 0 | 0 | 1 |
| 149251201 | LOC667272      | hypothetical protein                     | 0 | 0 | 1 |
| 149264220 | EG638833       | hypothetical protein                     | 2 | 0 | 0 |
| 94390708  | LOC676546      | hypothetical protein                     | 0 | 1 | 0 |
| 149271772 | EG668103       | hypothetical protein                     | 1 | 0 | 0 |
| 260593694 | Syde2          | hypothetical protein                     | 1 | 1 | 0 |
| 149256553 | Wdr88          | hypothetical protein                     | 1 | 0 | 0 |
| 309272933 | LOC100039192   | hypothetical protein isoform 1           | 1 | 0 | 0 |
| 94384306  | EG667847       | hypothetical protein isoform 2           | 0 | 0 | 1 |
| 150010568 | Gm11273        | hypothetical protein LOC100040340        | 3 | 2 | 5 |
| 169808401 | Gm10639        | hypothetical protein LOC100042314        | 1 | 0 | 0 |
| 154689748 | Gm4297         | hypothetical protein LOC100043216        | 0 | 1 | 0 |
| 150246529 | Gm14308        | hypothetical protein LOC100043381        | 0 | 1 | 0 |
| 150010631 | Gm12769        | hypothetical protein LOC100043860        | 1 | 0 | 0 |
| 156119549 | LOC100048775   | hypothetical protein LOC100048775        | 0 | 0 | 1 |
| 153945763 | 1700047117Rik2 | hypothetical protein LOC100101807        | 3 | 0 | 0 |
| 309272110 | Al481877       | hypothetical protein LOC100155           | 0 | 1 | 0 |
| 30424982  | Fam46b         | hypothetical protein LOC100342           | 1 | 0 | 0 |
| 153791366 | AA792892       | hypothetical protein LOC100554           | 0 | 1 | 0 |
| 19527154  | 6720456B07Rik  | hypothetical protein LOC101314           | 1 | 3 | 0 |
| 56090602  | D8ErtD738e     | hypothetical protein LOC101966           | 0 | 1 | 0 |
| 309269999 | AA414992       | hypothetical protein LOC102402           | 1 | 1 | 1 |
| 295054298 | 0610010K14Rik  | hypothetical protein LOC104457           | 0 | 3 | 0 |
| 294997276 | Fam149b        | hypothetical protein LOC105428 isoform 1 | 0 | 1 | 0 |
| 110625732 | Al314976       | hypothetical protein LOC106821           | 1 | 4 | 0 |
| 261245048 | Al790298       | hypothetical protein LOC107239 isoform 3 | 1 | 0 | 1 |
| 13386132  | 4632417K18Rik  | hypothetical protein LOC107373           | 1 | 1 | 0 |
| 19527218  | 1810008A18Rik  | hypothetical protein LOC108707           | 0 | 0 | 1 |
| 61657928  | 4933409K07Rik  | hypothetical protein LOC108816           | 1 | 0 | 0 |
| 309267610 | C330006A16Rik  | hypothetical protein LOC109299           | 1 | 0 | 0 |
| 148491086 | Fam175b        | hypothetical protein LOC109359           | 1 | 0 | 0 |
| 113931644 | Fam83b         | hypothetical protein LOC208994           | 0 | 0 | 1 |
| 22122389  | 1110007A13Rik  | hypothetical protein LOC210711           | 1 | 1 | 0 |

|           |               |                                          |    |   |   |
|-----------|---------------|------------------------------------------|----|---|---|
| 112817622 | D15Ert621e    | hypothetical protein LOC210998           | 1  | 0 | 0 |
| 269784766 | Gm382         | hypothetical protein LOC211208           | 1  | 0 | 0 |
| 253970387 | BC021381      | hypothetical protein LOC212483           | 0  | 0 | 1 |
| 160333243 | BC060267      | hypothetical protein LOC212516           | 1  | 0 | 0 |
| 162138942 | Gm381         | hypothetical protein LOC214308           | 0  | 0 | 1 |
| 268607692 | BC003965      | hypothetical protein LOC214489           | 1  | 0 | 0 |
| 116812912 | E330016A19Rik | hypothetical protein LOC214763           | 1  | 0 | 0 |
| 21703824  | Fam20b        | hypothetical protein LOC215015           | 5  | 0 | 0 |
| 167621420 | D930020B18Rik | hypothetical protein LOC216393           | 0  | 0 | 1 |
| 21450219  | BC017643      | hypothetical protein LOC217370           | 1  | 0 | 0 |
| 226958568 | BC002230      | hypothetical protein LOC217827 isoform 1 | 0  | 1 | 0 |
| 31981784  | 9030617O03Rik | hypothetical protein LOC217830           | 3  | 0 | 0 |
| 226958579 | 1300010F03Rik | hypothetical protein LOC219189           | 1  | 0 | 0 |
| 21450053  | Fam49b        | hypothetical protein LOC223601           | 6  | 0 | 0 |
| 21735489  | C030006K11Rik | hypothetical protein LOC223665 isoform 2 | 1  | 1 | 0 |
| 85701776  | 5031439G07Rik | hypothetical protein LOC223739           | 1  | 0 | 0 |
| 260593706 | 4930455B06Rik | hypothetical protein LOC223825           | 0  | 0 | 2 |
| 31541868  | 2310008H04Rik | hypothetical protein LOC224008           | 1  | 0 | 0 |
| 29244026  | Fam43a        | hypothetical protein LOC224093           | 0  | 0 | 1 |
| 113461986 | D17Wsu92e     | hypothetical protein LOC224647 isoform 1 | 0  | 0 | 1 |
| 161484644 | AI661453      | hypothetical protein LOC224833           | 2  | 1 | 1 |
| 23346595  | 2410015M20Rik | hypothetical protein LOC224904           | 1  | 0 | 2 |
| 21450105  | BC021614      | hypothetical protein LOC225884           | 0  | 0 | 1 |
| 242247266 | Gm98          | hypothetical protein LOC225908 isoform 2 | 1  | 0 | 0 |
| 124486767 | C030046E11Rik | hypothetical protein LOC226089           | 1  | 0 | 0 |
| 124487015 | Fam178a       | hypothetical protein LOC226151           | 0  | 1 | 0 |
| 256665261 | 9930023K05Rik | hypothetical protein LOC226245           | 1  | 0 | 0 |
| 27369930  | 4632411B12Rik | hypothetical protein LOC226976           | 1  | 0 | 0 |
| 31981884  | A830007P12Rik | hypothetical protein LOC227612           | 1  | 0 | 0 |
| 23956330  | BC029214      | hypothetical protein LOC227622           | 0  | 1 | 0 |
| 305682577 | D2Wsu81e      | hypothetical protein LOC227695           | 0  | 1 | 0 |
| 22122641  | Fam129b       | hypothetical protein LOC227737           | 7  | 1 | 0 |
| 126157490 | 4833423E24Rik | hypothetical protein LOC228151           | 0  | 1 | 0 |
| 85701806  | Gm561         | hypothetical protein LOC228715           | 1  | 0 | 0 |
| 29244072  | 6820408C15Rik | hypothetical protein LOC228778           | 0  | 1 | 0 |
| 124487299 | B230339M05Rik | hypothetical protein LOC228850           | 0  | 1 | 0 |
| 114205395 | D930015E06Rik | hypothetical protein LOC229473           | 0  | 1 | 0 |
| 158341634 | Fam160a1      | hypothetical protein LOC229488           | 0  | 1 | 0 |
| 67625729  | Gm128         | hypothetical protein LOC229588           | 0  | 1 | 0 |
| 169646306 | Fam40a        | hypothetical protein LOC229707           | 0  | 0 | 1 |
| 37718970  | AI314180      | hypothetical protein LOC230249           | 4  | 1 | 0 |
| 124487123 | BC057079      | hypothetical protein LOC230393           | 0  | 0 | 1 |
| 59958368  | AU022252      | hypothetical protein LOC230696           | 1  | 0 | 0 |
| 26024305  | Fam176b       | hypothetical protein LOC230752           | 0  | 0 | 1 |
| 255003755 | Fam76a        | hypothetical protein LOC230789 isoform A | 0  | 1 | 0 |
| 85861260  | C230096C10Rik | hypothetical protein LOC230866 isoform 1 | 11 | 0 | 5 |

|           |               |                                           |    |   |   |
|-----------|---------------|-------------------------------------------|----|---|---|
| 22122693  | BC023882      | hypothetical protein LOC231123            | 0  | 1 | 0 |
| 148664203 | BC023744      | hypothetical protein LOC231668            | 1  | 0 | 0 |
| 55742803  | C330023M02Rik | hypothetical protein LOC231713            | 1  | 3 | 0 |
| 82546849  | C330006K01Rik | hypothetical protein LOC231855            | 0  | 0 | 1 |
| 170650679 | E130309D02Rik | hypothetical protein LOC231868            | 0  | 2 | 0 |
| 29244114  | AU022870      | hypothetical protein LOC231874            | 1  | 0 | 0 |
| 223633888 | D430041B17Rik | hypothetical protein LOC232813            | 0  | 0 | 1 |
| 124486628 | D430042O09Rik | hypothetical protein LOC233865            | 0  | 1 | 0 |
| 110681698 | D10627        | hypothetical protein LOC234358            | 1  | 0 | 0 |
| 21450339  | AU018778      | hypothetical protein LOC234564            | 0  | 1 | 0 |
| 255069806 | 6430548M08Rik | hypothetical protein LOC234797 isoform a  | 0  | 1 | 0 |
| 113866019 | AK129341      | hypothetical protein LOC234915            | 0  | 1 | 0 |
| 85702063  | 1700071K01Rik | hypothetical protein LOC237880            | 9  | 1 | 6 |
| 283046769 | BC068281      | hypothetical protein LOC238037            | 0  | 1 | 0 |
| 22003884  | 6430527G18Rik | hypothetical protein LOC238330            | 11 | 6 | 2 |
| 226053365 | AI836003      | hypothetical protein LOC239650            | 0  | 0 | 1 |
| 269914154 | 4732456N10Rik | hypothetical protein LOC239673            | 2  | 2 | 3 |
| 159110675 | A630033E08Rik | hypothetical protein LOC240041 isoform b  | 0  | 1 | 0 |
| 22122835  | BC031441      | hypothetical protein LOC240120            | 0  | 0 | 1 |
| 124378024 | 6330439K17Rik | hypothetical protein LOC241688            | 2  | 0 | 0 |
| 30425280  | 4930412F15Rik | hypothetical protein LOC242408            | 1  | 0 | 0 |
| 148227266 | 4930500O05Rik | hypothetical protein LOC242409            | 0  | 0 | 1 |
| 148225566 | Gm4987        | hypothetical protein LOC245405            | 2  | 0 | 2 |
| 262118195 | 4930595M18Rik | hypothetical protein LOC245492            | 0  | 0 | 1 |
| 22122859  | BC031748      | hypothetical protein LOC245622            | 0  | 0 | 1 |
| 147900187 | E030025P04Rik | hypothetical protein LOC268498            | 0  | 1 | 0 |
| 124430709 | 2310021P13Rik | hypothetical protein LOC268721            | 0  | 0 | 1 |
| 256355176 | AI480653      | hypothetical protein LOC268880            | 1  | 0 | 0 |
| 167830469 | 3110057O12Rik | hypothetical protein LOC269423            | 1  | 0 | 1 |
| 282396075 | C030048B08Rik | hypothetical protein LOC269623            | 1  | 0 | 0 |
| 256220954 | BC030046      | hypothetical protein LOC277154            | 0  | 1 | 0 |
| 187280849 | Gm13083       | hypothetical protein LOC279185            | 0  | 1 | 0 |
| 267844902 | D6Wsu116e     | hypothetical protein LOC28006             | 1  | 0 | 0 |
| 21703842  | D10Wsu52e     | hypothetical protein LOC28088             | 6  | 6 | 2 |
| 18250288  | D17Wsu104e    | hypothetical protein LOC28106             | 3  | 0 | 0 |
| 119392079 | BC049715      | hypothetical protein LOC320135            | 1  | 0 | 0 |
| 124486602 | 4930473A06Rik | hypothetical protein LOC320226            | 3  | 0 | 0 |
| 86198339  | A930041I02Rik | hypothetical protein LOC320271            | 0  | 1 | 0 |
| 130502228 | A430107D22Rik | hypothetical protein LOC320484            | 1  | 0 | 0 |
| 83627724  | Fam40b        | hypothetical protein LOC320609 isoform a  | 0  | 0 | 1 |
| 254939685 | A430041B07Rik | hypothetical protein LOC328108 isoform 11 | 1  | 0 | 0 |
| 187283015 | Gm13109       | hypothetical protein LOC329984            | 0  | 1 | 0 |

|           |               |                                          |   |    |   |
|-----------|---------------|------------------------------------------|---|----|---|
| 56090469  | BC080695      | hypothetical protein LOC329986           | 0 | 1  | 0 |
| 34303989  | Gm5111        | hypothetical protein LOC330305           | 0 | 0  | 1 |
| 141801938 | D330038O06Rik | hypothetical protein LOC330788           | 0 | 0  | 1 |
| 197384598 | Gm15104       | hypothetical protein LOC333588           | 1 | 0  | 0 |
| 94388845  | 4930485B16Rik | hypothetical protein LOC380654           | 1 | 2  | 0 |
| 53749206  | Gm1574        | hypothetical protein LOC380842           | 1 | 1  | 0 |
| 85701949  | Gm906         | hypothetical protein LOC380882           | 0 | 0  | 1 |
| 49457863  | C230021P08Rik | hypothetical protein LOC380969           | 1 | 0  | 0 |
| 85702244  | 2210404J11Rik | hypothetical protein LOC381062 isoform 1 | 1 | 1  | 1 |
| 50284537  | BC049807      | hypothetical protein LOC381066           | 0 | 1  | 0 |
| 124244085 | Gm973         | hypothetical protein LOC381260           | 1 | 0  | 0 |
| 38348552  | B930007M17Rik | hypothetical protein LOC381476           | 0 | 1  | 0 |
| 256017234 | C87414        | hypothetical protein LOC381654 isoform 6 | 0 | 0  | 1 |
| 38348570  | 4930590J08Rik | hypothetical protein LOC381798           | 1 | 1  | 1 |
| 158937284 | Cpxcr1        | hypothetical protein LOC382239           | 0 | 1  | 0 |
| 197333803 | Fam55c        | hypothetical protein LOC385658           | 0 | 1  | 0 |
| 142383655 | BC066028      | hypothetical protein LOC407812           | 0 | 0  | 2 |
| 62000658  | E130309D14Rik | hypothetical protein LOC432582           | 1 | 0  | 0 |
| 164519048 | Fam105b       | hypothetical protein LOC432940           | 0 | 0  | 1 |
| 197313752 | Gm5538        | hypothetical protein LOC433597           | 0 | 1  | 0 |
| 51921351  | AA415398      | hypothetical protein LOC433752           | 1 | 0  | 0 |
| 51921355  | BC057022      | hypothetical protein LOC433940           | 1 | 0  | 0 |
| 62000668  | Fam169b       | hypothetical protein LOC434197           | 1 | 0  | 0 |
| 56606037  | BC085271      | hypothetical protein LOC434632           | 5 | 6  | 1 |
| 85702181  | 6330534C20Rik | hypothetical protein LOC434778           | 0 | 0  | 1 |
| 13384936  | D10ErtD641e   | hypothetical protein LOC52717            | 0 | 2  | 0 |
| 26553441  | D1Bwg0212e    | hypothetical protein LOC52846            | 0 | 0  | 1 |
| 147901636 | Gm13298       | hypothetical protein LOC545611           | 0 | 1  | 0 |
| 148238094 | Gm13276       | hypothetical protein LOC545649           | 0 | 0  | 1 |
| 75832179  | Gm16367       | hypothetical protein LOC545762           | 0 | 0  | 1 |
| 148222101 | Gm13178       | hypothetical protein LOC546849           | 0 | 1  | 0 |
| 120587013 | Fam181b       | hypothetical protein LOC58238            | 0 | 0  | 1 |
| 10946822  | 0610007P14Rik | hypothetical protein LOC58520            | 2 | 0  | 1 |
| 85702129  | 4930428D18Rik | hypothetical protein LOC619294           | 1 | 0  | 1 |
| 85702306  | Gm6320        | hypothetical protein LOC622408           | 0 | 0  | 1 |
| 254540148 | Gm6583        | hypothetical protein LOC625424           | 0 | 1  | 0 |
| 148229840 | Gm13101       | hypothetical protein LOC626922           | 1 | 0  | 0 |
| 169234924 | Gm13125       | hypothetical protein LOC627009           | 1 | 0  | 0 |
| 149588862 | Gm6812        | hypothetical protein LOC627927           | 0 | 0  | 1 |
| 85986673  | Gm7276        | hypothetical protein LOC639653           | 0 | 0  | 1 |
| 292781931 | D14ErtD449e   | hypothetical protein LOC66039            | 2 | 0  | 0 |
| 124487393 | 0910001L09Rik | hypothetical protein LOC66096            | 2 | 0  | 0 |
| 227908787 | 1110008L16Rik | hypothetical protein LOC66132            | 0 | 1  | 0 |
| 13384786  | 1110031I02Rik | hypothetical protein LOC66179            | 0 | 0  | 1 |
| 124487145 | 1110037F02Rik | hypothetical protein LOC66185            | 0 | 15 | 0 |
| 13384816  | 1110059E24Rik | hypothetical protein LOC66206            | 0 | 1  | 0 |
| 77917612  | Fam134b       | hypothetical protein LOC66270 isoform 1  | 1 | 0  | 0 |
| 116008181 | 1810012P15Rik | hypothetical protein LOC66274            | 1 | 0  | 0 |
| 13384876  | 1810009A15Rik | hypothetical protein LOC66276            | 0 | 2  | 0 |
| 224177530 | 1810013D10Rik | hypothetical protein LOC66278            | 1 | 0  | 0 |

|           |               |                                          |   |   |   |
|-----------|---------------|------------------------------------------|---|---|---|
| 13384908  | 1700011A15Rik | hypothetical protein LOC66322            | 0 | 1 | 3 |
| 269996023 | 2310008H09Rik | hypothetical protein LOC66356            | 1 | 0 | 0 |
| 30794468  | 2410001C21Rik | hypothetical protein LOC66404            | 1 | 4 | 0 |
| 13384992  | 1810049H13Rik | hypothetical protein LOC66431            | 1 | 0 | 0 |
| 89111930  | BC003883      | hypothetical protein LOC664621           | 1 | 0 | 0 |
| 13385042  | 2010309E21Rik | hypothetical protein LOC66488            | 2 | 0 | 0 |
| 165932364 | 2610528E23Rik | hypothetical protein LOC66497            | 0 | 3 | 0 |
| 242332593 | 2400001E08Rik | hypothetical protein LOC66508            | 1 | 0 | 1 |
| 33457314  | 2310061C15Rik | hypothetical protein LOC66531            | 1 | 0 | 0 |
| 157364970 | Gm11808       | hypothetical protein LOC666586           | 3 | 5 | 4 |
| 27228993  | 6330409N04Rik | hypothetical protein LOC66674            | 2 | 0 | 0 |
| 160333500 | Gm14446       | hypothetical protein LOC667373 isoform 2 | 1 | 0 | 1 |
| 21313338  | 4933411K16Rik | hypothetical protein LOC66765            | 0 | 1 | 0 |
| 229577364 | 1200016B10Rik | hypothetical protein LOC66875            | 0 | 0 | 1 |
| 167908803 | Gm14160       | hypothetical protein LOC668929           | 0 | 0 | 1 |
| 148276987 | 2410002O22Rik | hypothetical protein LOC66975 isoform 2  | 1 | 0 | 0 |
| 224967102 | 2010011I20Rik | hypothetical protein LOC67017            | 1 | 0 | 0 |
| 21362305  | 2900011O08Rik | hypothetical protein LOC67254            | 0 | 1 | 0 |
| 13385560  | 2900010M23Rik | hypothetical protein LOC67267            | 1 | 3 | 0 |
| 51571945  | 5730559C18Rik | hypothetical protein LOC67313            | 0 | 1 | 0 |
| 94366451  | 1700084E18Rik | hypothetical protein LOC67350            | 0 | 0 | 1 |
| 31981066  | 2410127L17Rik | hypothetical protein LOC67383            | 1 | 0 | 0 |
| 227330590 | 1810074P20Rik | hypothetical protein LOC67490            | 1 | 0 | 0 |
| 21313570  | 1810037I17Rik | hypothetical protein LOC67704            | 1 | 0 | 0 |
| 21312816  | Fam114a2      | hypothetical protein LOC67726            | 3 | 0 | 2 |
| 254588114 | 4930560E09Rik | hypothetical protein LOC67737            | 0 | 1 | 0 |
| 21312800  | 5033414D02Rik | hypothetical protein LOC67759            | 1 | 0 | 6 |
| 268837283 | 5830433M19Rik | hypothetical protein LOC67770            | 0 | 1 | 0 |
| 169646352 | 2610027L16Rik | hypothetical protein LOC67842            | 0 | 2 | 2 |
| 13385904  | 1700021F05Rik | hypothetical protein LOC67851            | 1 | 4 | 0 |
| 13259376  | 2310033P09Rik | hypothetical protein LOC67862            | 1 | 1 | 1 |
| 30424683  | 1810063B05Rik | hypothetical protein LOC67892            | 1 | 1 | 0 |
| 13385950  | 2510049I19Rik | hypothetical protein LOC67922            | 0 | 0 | 1 |
| 28077025  | Fam134c       | hypothetical protein LOC67998 isoform 2  | 2 | 0 | 0 |
| 13386026  | 2700060E02Rik | hypothetical protein LOC68045            | 8 | 9 | 1 |
| 145587094 | 9430016H08Rik | hypothetical protein LOC68115            | 2 | 0 | 0 |
| 170650597 | Fam114a1      | hypothetical protein LOC68303            | 1 | 0 | 0 |
| 124486662 | 1110014N23Rik | hypothetical protein LOC68505            | 2 | 0 | 1 |
| 20901299  | 1110020A21Rik | hypothetical protein LOC68531            | 0 | 1 | 0 |
| 85362708  | 2310036O22Rik | hypothetical protein LOC68544            | 0 | 4 | 0 |
| 134053922 | 1110002N22Rik | hypothetical protein LOC68550            | 0 | 4 | 2 |
| 146134519 | 1110020G09Rik | hypothetical protein LOC68646 isoform 2  | 1 | 0 | 0 |
| 170172570 | 1110028C15Rik | hypothetical protein LOC68691 isoform 1  | 0 | 1 | 0 |
| 83649762  | ORF19         | hypothetical protein LOC68767            | 3 | 1 | 0 |
| 112181297 | 1110038D17Rik | hypothetical protein LOC68778            | 1 | 0 | 0 |
| 269995975 | 1110057K04Rik | hypothetical protein LOC68832            | 2 | 0 | 0 |
| 58037137  | 1500032L24Rik | hypothetical protein LOC69029            | 3 | 0 | 1 |



|           |               |                                          |   |   |   |
|-----------|---------------|------------------------------------------|---|---|---|
| 224591395 | 4930579G22Rik | hypothetical protein LOC69034            | 1 | 0 | 0 |
| 110625730 | 1810027O10Rik | hypothetical protein LOC69186            | 1 | 0 | 1 |
| 110625717 | 2610034M16Rik | hypothetical protein LOC69239            | 1 | 0 | 0 |
| 267844862 | 1700011H22Rik | hypothetical protein LOC69314            | 1 | 0 | 0 |
| 254675210 | 2310004N24Rik | hypothetical protein LOC69535            | 0 | 1 | 0 |
| 281427239 | 2310010M20Rik | hypothetical protein LOC69576            | 0 | 1 | 0 |
| 31981558  | 2310037I24Rik | hypothetical protein LOC69612            | 0 | 1 | 0 |
| 30519953  | 1810026J23Rik | hypothetical protein LOC69773            | 1 | 0 | 0 |
| 149253713 | 1600023N17Rik | hypothetical protein LOC69788            | 0 | 0 | 1 |
| 117647253 | 2010321M09Rik | hypothetical protein LOC69882            | 0 | 9 | 1 |
| 28076933  | 2010305A19Rik | hypothetical protein LOC69893            | 3 | 0 | 0 |
| 21312460  | 2010107G23Rik | hypothetical protein LOC69894            | 1 | 0 | 0 |
| 227430284 | 2810432D09Rik | hypothetical protein LOC69961            | 0 | 2 | 0 |
| 21312536  | 2310005N01Rik | hypothetical protein LOC70088            | 0 | 2 | 2 |
| 309271794 | 2210011C24Rik | hypothetical protein LOC70134            | 0 | 2 | 5 |
| 121583673 | 2510012J08Rik | hypothetical protein LOC70312            | 0 | 0 | 1 |
| 227330606 | 2610109H07Rik | hypothetical protein LOC70433            | 0 | 0 | 1 |
| 27229101  | 5730469M10Rik | hypothetical protein LOC70564            | 5 | 0 | 1 |
| 28076961  | 5730508B09Rik | hypothetical protein LOC70617            | 1 | 0 | 1 |
| 21389313  | 4921507P07Rik | hypothetical protein LOC70821            | 0 | 1 | 0 |
| 166795271 | 4921517L17Rik | hypothetical protein LOC70873            | 1 | 0 | 0 |
| 46559372  | 4921511H03Rik | hypothetical protein LOC70920            | 1 | 0 | 0 |
| 94407493  | 4931400O07Rik | hypothetical protein LOC70936            | 1 | 0 | 0 |
| 254588072 | 4921539E11Rik | hypothetical protein LOC70941 isoform 3  | 0 | 0 | 1 |
| 313747468 | 4931406C07Rik | hypothetical protein LOC70984            | 2 | 0 | 0 |
| 13386252  | 4933421I07Rik | hypothetical protein LOC71162            | 1 | 0 | 0 |
| 116089316 | 5430419D17Rik | hypothetical protein LOC71395            | 0 | 0 | 1 |
| 124486859 | 9030418K01Rik | hypothetical protein LOC71532            | 0 | 0 | 1 |
| 139947660 | 9130011E15Rik | hypothetical protein LOC71617            | 1 | 0 | 0 |
| 166851844 | 4930506M07Rik | hypothetical protein LOC71653 isoform 2  | 4 | 0 | 0 |
| 117956375 | 0610010F05Rik | hypothetical protein LOC71675            | 0 | 1 | 0 |
| 254553418 | 1700019O17Rik | hypothetical protein LOC71863 isoform 3  | 1 | 0 | 0 |
| 239937493 | 2310002L09Rik | hypothetical protein LOC71886 isoform 2  | 0 | 1 | 0 |
| 124487325 | 2010317E24Rik | hypothetical protein LOC72080            | 0 | 0 | 1 |
| 259013526 | 2810406K13Rik | hypothetical protein LOC72184 isoform 1  | 0 | 1 | 0 |
| 251823881 | 1700030K09Rik | hypothetical protein LOC72254            | 1 | 0 | 0 |
| 262118187 | 2610507B11Rik | hypothetical protein LOC72503            | 1 | 0 | 0 |
| 254692993 | 2610307O08Rik | hypothetical protein LOC72512 isoform 12 | 1 | 0 | 0 |
| 198278498 | 2700029M09Rik | hypothetical protein LOC72612            | 0 | 3 | 0 |
| 33859720  | 2810006K23Rik | hypothetical protein LOC72650 isoform a  | 1 | 2 | 0 |
| 139948818 | Fam98a        | hypothetical protein LOC72722            | 0 | 2 | 0 |
| 315139016 | 2810455K09Rik | hypothetical protein LOC72805            | 0 | 1 | 0 |
| 28849885  | Fam76b        | hypothetical protein LOC72826            | 1 | 3 | 0 |

|           |               |                                         |   |   |   |
|-----------|---------------|-----------------------------------------|---|---|---|
| 268607568 | 2900006K08Rik | hypothetical protein LOC72873           | 0 | 1 | 0 |
| 153791468 | 3110003A17Rik | hypothetical protein LOC73112           | 1 | 0 | 0 |
| 146134371 | 3110082I17Rik | hypothetical protein LOC73212           | 2 | 3 | 1 |
| 110625952 | 1700054N08Rik | hypothetical protein LOC73420           | 0 | 1 | 0 |
| 83019564  | 1700055N04Rik | hypothetical protein LOC73458 isoform 1 | 1 | 0 | 0 |
| 258679514 | 1700001O22Rik | hypothetical protein LOC73598           | 0 | 0 | 1 |
| 259906436 | 2410076I21Rik | hypothetical protein LOC73673 isoform 2 | 1 | 0 | 0 |
| 158937256 | 2410091C18Rik | hypothetical protein LOC73694           | 0 | 0 | 1 |
| 255982598 | 4930431J08Rik | hypothetical protein LOC73884           | 1 | 1 | 0 |
| 21311939  | 1300018I05Rik | hypothetical protein LOC74157           | 0 | 1 | 0 |
| 21312668  | 2210009G21Rik | hypothetical protein LOC74243 isoform 1 | 0 | 0 | 1 |
| 82914092  | 1700095J03Rik | hypothetical protein LOC74293           | 1 | 1 | 0 |
| 268370019 | 1700106J16Rik | hypothetical protein LOC74297           | 1 | 0 | 0 |
| 198278494 | 4933433C11Rik | hypothetical protein LOC74472           | 1 | 0 | 0 |
| 33859728  | 4933427D14Rik | hypothetical protein LOC74477           | 0 | 1 | 0 |
| 21312828  | 4930444A02Rik | hypothetical protein LOC74653           | 0 | 1 | 0 |
| 70778924  | 4930432O21Rik | hypothetical protein LOC74670           | 0 | 0 | 1 |
| 241982721 | 4930505D03Rik | hypothetical protein LOC74694           | 1 | 0 | 0 |
| 149249613 | 4930517E11Rik | hypothetical protein LOC74702           | 1 | 0 | 0 |
| 58037391  | 4930417G10Rik | hypothetical protein LOC74855           | 1 | 0 | 0 |
| 229577050 | 4930455F23Rik | hypothetical protein LOC74895           | 0 | 1 | 0 |
| 188497646 | 4930471M23Rik | hypothetical protein LOC74919           | 1 | 0 | 0 |
| 149263484 | 4930463M05Rik | hypothetical protein LOC74947           | 1 | 0 | 0 |
| 41680647  | Fam63a        | hypothetical protein LOC75007           | 2 | 0 | 0 |
| 309271050 | 4930505H01Rik | hypothetical protein LOC75039           | 0 | 1 | 0 |
| 118150478 | 4930578N16Rik | hypothetical protein LOC75051           | 1 | 0 | 0 |
| 254910967 | 4930563E22Rik | hypothetical protein LOC75304 isoform 3 | 1 | 0 | 0 |
| 90819235  | 4930547N16Rik | hypothetical protein LOC75317           | 1 | 0 | 1 |
| 124487453 | 1100001E04Rik | hypothetical protein LOC75404           | 0 | 0 | 1 |
| 242247213 | 3100002J23Rik | hypothetical protein LOC75429 isoform 2 | 0 | 2 | 0 |
| 27229109  | 3200002M19Rik | hypothetical protein LOC75430           | 0 | 1 | 0 |
| 254675147 | 1700011E24Rik | hypothetical protein LOC75467 isoform 2 | 0 | 1 | 0 |
| 149271661 | 1700019B21Rik | hypothetical protein LOC75545           | 1 | 0 | 0 |
| 145301546 | Fam65a        | hypothetical protein LOC75687           | 1 | 0 | 0 |
| 34147101  | 4932414N04Rik | hypothetical protein LOC75721           | 0 | 1 | 0 |
| 187607842 | 4930525F21Rik | hypothetical protein LOC75823           | 1 | 0 | 1 |
| 149263204 | 5033425G24Rik | hypothetical protein LOC75998           | 1 | 0 | 0 |
| 113461996 | 6330578E17Rik | hypothetical protein LOC76178           | 0 | 1 | 0 |
| 268370105 | 1500005K14Rik | hypothetical protein LOC76566           | 0 | 2 | 1 |
| 21313252  | 1700027D21Rik | hypothetical protein LOC76573           | 1 | 0 | 0 |
| 124486668 | 1700081L11Rik | hypothetical protein LOC76719           | 0 | 0 | 1 |
| 244790037 | 2610029I01Rik | hypothetical protein LOC77032           | 1 | 0 | 0 |
| 149263528 | 9430024F10Rik | hypothetical protein LOC77271           | 0 | 0 | 1 |
| 166063959 | C330007P06Rik | hypothetical protein LOC77644           | 0 | 1 | 0 |

|           |               |                                                     |    |   |    |
|-----------|---------------|-----------------------------------------------------|----|---|----|
| 83028090  | A930009A15Rik | hypothetical protein LOC77798                       | 0  | 1 | 0  |
| 261599071 | 6030458C11Rik | hypothetical protein LOC77877                       | 1  | 0 | 0  |
| 94363736  | A030003K21Rik | hypothetical protein LOC77913                       | 1  | 0 | 0  |
| 82880741  | A030005L19Rik | hypothetical protein LOC77922                       | 1  | 0 | 0  |
| 149269931 | 4930578E11Rik | hypothetical protein LOC78058                       | 1  | 0 | 0  |
| 94366941  | 6430503K07Rik | hypothetical protein LOC78068                       | 0  | 1 | 0  |
| 21704218  | 8430410K20Rik | hypothetical protein LOC78100                       | 0  | 0 | 1  |
| 149245226 | 4930439D14Rik | hypothetical protein LOC78167                       | 0  | 0 | 1  |
| 94400636  | 4930578N18Rik | hypothetical protein LOC78215                       | 0  | 1 | 0  |
| 149268292 | 3300005D01Rik | hypothetical protein LOC78512                       | 0  | 0 | 1  |
| 31044487  | B230219D22Rik | hypothetical protein LOC78521                       | 0  | 5 | 3  |
| 21313496  | 4930555I21Rik | hypothetical protein LOC78806                       | 1  | 0 | 0  |
| 285402250 | 2700078E11Rik | hypothetical protein LOC78832                       | 1  | 0 | 0  |
| 82907090  | B230218P12Rik | hypothetical protein LOC78880 isoform 2             | 0  | 1 | 0  |
| 13384892  | BC003266      | hypothetical protein LOC80284                       | 1  | 0 | 0  |
| 190014629 | C430004E15Rik | hypothetical protein LOC97031                       | 0  | 6 | 1  |
| 75677516  | C77080        | hypothetical protein LOC97130                       | 0  | 2 | 0  |
| 247300872 | A430005L14Rik | hypothetical protein LOC97159 isoform 1             | 0  | 2 | 0  |
| 19527012  | 4833439L19Rik | hypothetical protein LOC97820                       | 1  | 0 | 0  |
| 270309107 | 5033414K04Rik | hypothetical protein LOC98496                       | 1  | 0 | 0  |
| 96975138  | Hprt1         | hypoxanthine phosphoribosyltransferase 1            | 4  | 0 | 0  |
| 157951706 | Hyou1         | hypoxia up-regulated 1                              | 39 | 7 | 0  |
| 7657220   | Icosl         | icos ligand                                         | 1  | 0 | 0  |
| 170172526 | Idua          | iduronidase, alpha-L-                               | 0  | 1 | 0  |
| 33468955  | Ik            | IK cytokine                                         | 1  | 6 | 10 |
| 31982165  | Ikzf5         | IKAROS family zinc finger 5                         | 0  | 0 | 1  |
| 30424591  | Ilvbl         | ilvB (bacterial acetolactate synthase)-like         | 0  | 1 | 0  |
| 19387848  | Ict1          | immature colon carcinoma transcript 1               | 1  | 4 | 0  |
| 6680351   | Irgm1         | immunity-related GTPase family M member 1           | 1  | 0 | 1  |
| 208431800 | Irgq          | immunity-related GTPase family, Q                   | 0  | 0 | 1  |
| 304555605 | Igpb1         | immunoglobulin (CD79A) binding protein 1            | 1  | 0 | 0  |
| 153945808 | Ighmbp2       | immunoglobulin mu binding protein 2                 | 1  | 0 | 1  |
| 71040102  | Cadm1         | immunoglobulin superfamily, member 4A isoform a     | 2  | 0 | 0  |
| 32189434  | Igsf8         | immunoglobulin superfamily, member 8                | 1  | 0 | 0  |
| 19527196  | Imp3          | IMP3, U3 small nucleolar ribonucleoprotein, homolog | 0  | 3 | 4  |
| 298676498 | Magt1         | implantation-associated protein                     | 1  | 0 | 1  |
| 31541898  | Ipo11         | importin 11                                         | 0  | 0 | 2  |
| 29789199  | Ipo5          | importin 5                                          | 1  | 0 | 2  |
| 112734861 | Ipo9          | importin 9                                          | 3  | 0 | 4  |
| 55769581  | Inadl         | InaD-like isoform 1                                 | 1  | 0 | 11 |
| 6678281   | Inmt          | indolethylamine N-methyltransferase                 | 8  | 0 | 7  |
| 19111152  | Ing4          | inhibitor of growth family, member 4                | 0  | 1 | 1  |
| 21313552  | Ing5          | inhibitor of growth family, member 5                | 0  | 0 | 1  |
| 70608131  | Immt          | inner membrane protein, mitochondrial               | 24 | 0 | 38 |
| 27369894  | Ino80c        | INO80 complex subunit C                             | 0  | 3 | 0  |
| 167830449 | Ino80d        | INO80 complex subunit D isoform 1                   | 0  | 1 | 0  |
| 22203753  | Ppa2          | inorganic pyrophosphatase 2                         | 5  | 0 | 0  |
| 31981382  | Impdh2        | inosine 5'-phosphate dehydrogenase 2                | 1  | 0 | 0  |
| 31982664  | Itpa          | inosine triphosphatase                              | 3  | 0 | 0  |
| 31980942  | Impa1         | inositol (myo)-1(or 4)-monophosphatase 1            | 6  | 0 | 0  |

|           |          |                                                                               |    |    |   |
|-----------|----------|-------------------------------------------------------------------------------|----|----|---|
| 39979616  | Ippk     | inositol 1,3,4,5,6-pentakisphosphate 2-kinase                                 | 1  | 0  | 0 |
| 60593032  | Itpr2    | inositol 1,4,5-triphosphate receptor 2 isoform 1                              | 1  | 1  | 1 |
| 61102728  | Itpr3    | inositol 1,4,5-triphosphate receptor 3                                        | 0  | 0  | 1 |
| 22122643  | Itpka    | inositol 1,4,5-trisphosphate 3-kinase A                                       | 0  | 1  | 0 |
| 31712006  | Itpkc    | inositol 1,4,5-trisphosphate 3-kinase C                                       | 0  | 0  | 1 |
| 225903432 | Ip6k2    | inositol hexaphosphate kinase 2                                               | 0  | 1  | 0 |
| 13249351  | Ern1     | inositol-requiring 1 alpha                                                    | 1  | 0  | 0 |
| 121583922 | Ide      | insulin-degrading enzyme                                                      | 9  | 0  | 0 |
| 6753518   | Igf2bp1  | insulin-like growth factor 2 mRNA binding protein 1                           | 0  | 4  | 0 |
| 145207996 | Igf2bp2  | insulin-like growth factor 2 mRNA binding protein 2                           | 16 | 9  | 7 |
| 133778978 | Igf2r    | insulin-like growth factor 2 receptor                                         | 14 | 0  | 0 |
| 226958453 | Igfbp7   | insulin-like growth factor binding protein 7 isoform 2                        | 1  | 1  | 0 |
| 112983656 | Igf1r    | insulin-like growth factor I receptor                                         | 1  | 0  | 0 |
| 148747128 | Stt3a    | integral membrane protein 1                                                   | 5  | 0  | 0 |
| 6680502   | Itm2b    | integral membrane protein 2B                                                  | 3  | 0  | 0 |
| 294832004 | Ints1    | integrator complex subunit 1                                                  | 1  | 19 | 4 |
| 27229115  | Ints10   | integrator complex subunit 10                                                 | 1  | 2  | 1 |
| 86476084  | Ints2    | integrator complex subunit 2                                                  | 0  | 2  | 1 |
| 31652268  | Ints3    | integrator complex subunit 3                                                  | 0  | 26 | 3 |
| 30794414  | Ints4    | integrator complex subunit 4                                                  | 0  | 13 | 4 |
| 28849895  | Ints5    | integrator complex subunit 5                                                  | 0  | 5  | 2 |
| 51467749  | Ints6    | integrator complex subunit 6                                                  | 0  | 0  | 1 |
| 153791768 | Ints7    | integrator complex subunit 7                                                  | 0  | 2  | 1 |
| 227430333 | Ints8    | integrator complex subunit 8                                                  | 1  | 2  | 0 |
| 153791389 | Itga1    | integrin alpha 1                                                              | 9  | 0  | 0 |
| 225703035 | Itga11   | integrin alpha 11                                                             | 1  | 0  | 0 |
| 7305189   | Itga3    | integrin alpha 3                                                              | 24 | 0  | 0 |
| 31982236  | Itga6    | integrin alpha 6                                                              | 17 | 0  | 0 |
| 268839462 | Itfg1    | integrin alpha FG-GAP repeat containing 1                                     | 2  | 0  | 0 |
| 329744577 | Itfg3    | integrin alpha FG-GAP repeat containing 3                                     | 3  | 0  | 0 |
| 132626295 | Itgam    | integrin alpha M isoform 2 precursor                                          | 1  | 0  | 0 |
| 154240716 | Itgav    | integrin alpha V                                                              | 22 | 0  | 0 |
| 45504394  | Itgb1    | integrin beta 1                                                               | 25 | 0  | 0 |
| 6680488   | Itgb1bp1 | integrin beta 1 binding protein 1                                             | 0  | 1  | 0 |
| 110735428 | Itgb4    | integrin beta 4 isoform 1                                                     | 12 | 0  | 0 |
| 225007621 | Itgb5    | integrin beta 5 isoform 1                                                     | 6  | 0  | 0 |
| 227116271 | Itgb6    | integrin beta 6                                                               | 4  | 0  | 1 |
| 160708008 | Itgb7    | integrin beta 7                                                               | 1  | 0  | 0 |
| 124249086 | Itgb8    | integrin beta 8                                                               | 1  | 1  | 0 |
| 240255653 | Ilk      | integrin-linked kinase                                                        | 0  | 1  | 0 |
| 39930415  | Ilkap    | integrin-linked kinase-associated serine/threonine phosphatase 2C             | 0  | 1  | 0 |
| 124249351 | Itih1    | inter-alpha trypsin inhibitor, heavy chain 1                                  | 1  | 0  | 0 |
| 126722649 | Ifna2    | interferon alpha family, gene 2                                               | 1  | 0  | 0 |
| 125628657 | Ifi30    | interferon gamma inducible protein 30                                         | 5  | 0  | 0 |
| 257096038 | Ifih1    | interferon induced with helicase C domain 1                                   | 0  | 1  | 0 |
| 162287051 | Irf2     | interferon regulatory factor 2                                                | 0  | 2  | 0 |
| 31982348  | Irf2bp1  | interferon regulatory factor 2 binding protein 1                              | 1  | 0  | 1 |
| 114145467 | Irf6     | interferon regulatory factor 6                                                | 0  | 1  | 0 |
| 165377193 | Isg20    | interferon stimulated exonuclease                                             | 2  | 4  | 0 |
| 33469019  | Prkrir   | interferon-inducible, double stranded RNA dependent inhibitor, protein-kinase | 0  | 2  | 0 |
| 226062273 | Ifrd1    | interferon-related developmental regulator 1                                  | 1  | 0  | 1 |
| 13507616  | Il1rapl2 | interleukin 1 receptor accessory protein-like 2                               | 1  | 0  | 1 |

|           |         |                                                              |    |    |    |
|-----------|---------|--------------------------------------------------------------|----|----|----|
| 183396776 | Il1r1   | interleukin 1 receptor, type I isoform 1                     | 0  | 0  | 1  |
| 6680405   | Il13ra2 | interleukin 13 receptor, alpha 2                             | 0  | 1  | 0  |
| 6754326   | Il18rap | interleukin 18 receptor accessory protein                    | 1  | 0  | 0  |
| 254540187 | Il2ra   | interleukin 2 receptor, alpha chain                          | 0  | 1  | 0  |
| 257900495 | Il33    | interleukin 33                                               | 0  | 1  | 0  |
| 254553434 | Il4i1   | interleukin 4 induced 1                                      | 0  | 0  | 1  |
| 30142679  | Il8ra   | interleukin 8 receptor, alpha                                | 0  | 0  | 1  |
| 13385872  | Ilf2    | interleukin enhancer binding factor 2                        | 1  | 17 | 9  |
| 111607436 | Ilf3    | interleukin enhancer binding factor 3 isoform 1              | 0  | 23 | 12 |
| 158517890 | Impg1   | interphotoreceptor matrix proteoglycan 1                     | 0  | 0  | 1  |
| 255522773 | Ick     | intestinal cell kinase                                       | 0  | 0  | 1  |
| 184186088 | Ift140  | intraflagellar transport 140                                 | 0  | 1  | 0  |
| 21312562  | Iyd     | iodotyrosine dehalogenase 1 protein                          | 1  | 0  | 0  |
| 255003688 | Iqcb1   | IQ calmodulin-binding motif containing 1                     | 0  | 0  | 1  |
| 255683447 | Iqub    | IQ motif and ubiquitin domain containing                     | 1  | 0  | 0  |
| 254039594 | Iqwd1   | IQ motif and WD repeats 1                                    | 0  | 1  | 0  |
| 40254171  | Iqce    | IQ motif containing E                                        | 0  | 1  | 1  |
| 54020727  | Iqcf4   | IQ motif containing F4                                       | 1  | 0  | 0  |
| 30410018  | Iqcg    | IQ motif containing G                                        | 1  | 0  | 0  |
| 242332572 | Iqgap1  | IQ motif containing GTPase activating protein 1              | 55 | 45 | 30 |
| 118344444 | Iqgap2  | IQ motif containing GTPase activating protein 2              | 2  | 1  | 1  |
| 31543001  | Tbl1xr1 | IRA1 protein                                                 | 0  | 3  | 0  |
| 254281215 | Ireb2   | iron responsive element binding protein 2                    | 0  | 0  | 1  |
| 197333728 | Isoc2a  | isochorismatase domain containing 2a                         | 2  | 0  | 0  |
| 162417977 | Ish1    | isocitrate dehydrogenase 1 (NADP+), soluble                  | 6  | 0  | 0  |
| 225579033 | Ish2    | isocitrate dehydrogenase 2 (NADP+), mitochondrial            | 23 | 2  | 6  |
| 18250284  | Ish3a   | isocitrate dehydrogenase 3 (NAD+) alpha                      | 14 | 0  | 6  |
| 6680345   | Ish3g   | isocitrate dehydrogenase 3 (NAD+), gamma                     | 8  | 0  | 0  |
| 18700024  | Ish3b   | isocitrate dehydrogenase 3, beta subunit                     | 16 | 1  | 1  |
| 254553372 | Iars    | isoleucine tRNA synthetase                                   | 3  | 0  | 0  |
| 281604088 | Iid1    | isopentenyl-diphosphate delta isomerase isoform 2            | 4  | 0  | 0  |
| 9789985   | Ivd     | isovaleryl coenzyme A dehydrogenase                          | 12 | 0  | 0  |
| 20149316  | Ily1    | ISY1 splicing factor homolog                                 | 0  | 0  | 3  |
| 124487317 | Itch    | itchy, E3 ubiquitin protein ligase                           | 1  | 0  | 0  |
| 30352010  | Iws1    | IWS1 homolog                                                 | 0  | 9  | 0  |
| 114326480 | Jak2    | Janus kinase 2                                               | 0  | 0  | 1  |
| 254588016 | Jakmip1 | janus kinase and microtubule interacting protein 1           | 0  | 0  | 1  |
| 326807033 | Jsrp1   | JP-45 protein                                                | 0  | 1  | 0  |
| 225703114 | Hscb    | J-type co-chaperone HSC20                                    | 1  | 0  | 0  |
| 334724461 | Jmjd1c  | jumonji domain containing 1C                                 | 0  | 1  | 0  |
| 116174756 | Kdm4d   | jumonji domain containing 2D                                 | 1  | 0  | 0  |
| 226958545 | Jarid1a | jumonji, AT rich interactive domain 1A (Rbp2 like) isoform 1 | 0  | 4  | 1  |
| 46049047  | Jtb     | jumping translocation breakpoint                             | 1  | 0  | 0  |
| 6754404   | Jund    | jun D proto-oncogene                                         | 0  | 1  | 0  |
| 28395018  | Jup     | junction plakoglobin                                         | 16 | 9  | 27 |
| 10181142  | Jph3    | junctophilin 3                                               | 1  | 0  | 0  |
| 300116314 | Kat2b   | K(lysine) acetyltransferase 2B                               | 1  | 2  | 0  |
| 6679487   | Klk8    | kallikrein related-peptidase 8                               | 0  | 1  | 0  |
| 31543047  | Kpna1   | karyopherin (importin) alpha 1                               | 0  | 2  | 1  |
| 6754474   | Kpna2   | karyopherin (importin) alpha 2                               | 0  | 1  | 2  |
| 6680596   | Kpna3   | karyopherin (importin) alpha 3                               | 0  | 9  | 1  |
| 227116300 | Kpna6   | karyopherin (importin) alpha 6                               | 1  | 1  | 1  |
| 88014720  | Kpnb1   | karyopherin (importin) beta 1                                | 14 | 27 | 21 |

|           |               |                                                                           |    |    |    |
|-----------|---------------|---------------------------------------------------------------------------|----|----|----|
| 6680598   | Kpna4         | karyopherin alpha 4                                                       | 3  | 6  | 3  |
| 23956364  | Katnal1       | katanin p60 subunit A-like 1                                              | 0  | 1  | 0  |
| 21313044  | Katnal2       | katanin p60 subunit A-like 2                                              | 0  | 0  | 1  |
| 84095201  | Katnb1        | katanin p80 (WD40-containing) subunit B 1                                 | 0  | 1  | 0  |
| 157837992 | 9030409G11Rik | kazrin isoform 3                                                          | 0  | 1  | 0  |
| 12963767  | Kdelc1        | KDEL (Lys-Asp-Glu-Leu) containing 1                                       | 0  | 4  | 0  |
| 47078285  | Kdelc2        | KDEL (Lys-Asp-Glu-Leu) containing 2 protein                               | 2  | 0  | 0  |
| 13385318  | Kdelr2        | KDEL (Lys-Asp-Glu-Leu) endoplasmic reticulum protein retention receptor 2 | 1  | 1  | 1  |
| 19527170  | Kdelr1        | KDEL endoplasmic reticulum protein retention receptor 1                   | 1  | 0  | 1  |
| 124486935 | Kdm3b         | KDM3B lysine (K)-specific demethylase 3B                                  | 1  | 0  | 0  |
| 30142701  | Klhdc1        | kelch domain containing 1                                                 | 1  | 0  | 0  |
| 255683384 | Klhdc4        | kelch domain containing 4                                                 | 1  | 0  | 0  |
| 58037523  | Klhdc8b       | kelch domain containing 8B                                                | 0  | 0  | 1  |
| 124486714 | Klhl31        | kelch repeat and BTB (POZ) domain containing 1                            | 0  | 0  | 1  |
| 13385674  | Klhl13        | kelch-like 13                                                             | 0  | 0  | 1  |
| 84794653  | Klhl15        | kelch-like 15 isoform a                                                   | 0  | 0  | 1  |
| 87116679  | Klhl20        | kelch-like 20                                                             | 0  | 0  | 1  |
| 126157475 | Klhl34        | kelch-like 34                                                             | 0  | 1  | 0  |
| 22122779  | Klhl36        | kelch-like 36                                                             | 0  | 1  | 0  |
| 6754480   | Krt13         | keratin 13                                                                | 6  | 7  | 9  |
| 21489935  | Krt14         | keratin 14                                                                | 0  | 1  | 0  |
| 226823220 | Krt15         | keratin 15                                                                | 2  | 3  | 3  |
| 6680604   | Krt16         | keratin 16                                                                | 0  | 1  | 0  |
| 7106335   | Krt17         | keratin 17                                                                | 0  | 0  | 2  |
| 254540068 | Krt18         | keratin 18                                                                | 30 | 30 | 51 |
| 6680606   | Krt19         | keratin 19                                                                | 26 | 22 | 33 |
| 21592285  | Krt20         | keratin 20                                                                | 19 | 21 | 32 |
| 15431281  | Krt23         | keratin 23                                                                | 0  | 0  | 1  |
| 122425580 | Krt24         | keratin 24                                                                | 1  | 0  | 1  |
| 267844916 | Krt26         | keratin 26                                                                | 0  | 1  | 2  |
| 198278448 | Krt28         | keratin 28                                                                | 0  | 0  | 1  |
| 160333504 | Krt33a        | keratin 33A                                                               | 0  | 0  | 7  |
| 13386238  | Krt34         | keratin 34                                                                | 0  | 0  | 1  |
| 238231425 | Krt35         | keratin 35                                                                | 0  | 0  | 4  |
| 154090941 | Krt42         | keratin 42                                                                | 2  | 2  | 3  |
| 20911031  | Krt5          | keratin 5                                                                 | 1  | 2  | 6  |
| 54607171  | Krt6a         | keratin 6A                                                                | 1  | 1  | 2  |
| 22164776  | Krt79         | keratin 6L                                                                | 1  | 1  | 1  |
| 14861854  | Krt7          | keratin 7                                                                 | 26 | 22 | 38 |
| 47059013  | Krt73         | keratin 73                                                                | 0  | 0  | 1  |
| 51092295  | Krt74         | keratin 74                                                                | 3  | 3  | 6  |
| 29789317  | Krt75         | keratin 75                                                                | 0  | 0  | 1  |
| 85701680  | Krt76         | keratin 76                                                                | 3  | 4  | 6  |
| 51092293  | Krt77         | keratin 77                                                                | 0  | 0  | 2  |
| 124249090 | Krt80         | keratin 80                                                                | 0  | 0  | 1  |
| 282398110 | Krt82         | keratin 82                                                                | 0  | 0  | 1  |
| 269914157 | Krt83         | keratin 83                                                                | 0  | 0  | 1  |
| 74315985  | Krt86         | keratin 86                                                                | 0  | 0  | 2  |
| 145966692 | Krt31         | keratin complex 1, acidic, gene 1                                         | 0  | 0  | 4  |
| 112983636 | Krt10         | keratin complex 1, acidic, gene 10                                        | 6  | 6  | 10 |
| 118130981 | Krt12         | keratin complex 1, acidic, gene 12                                        | 1  | 1  | 2  |
| 31980832  | Krt85         | keratin complex 2, basic gene 18                                          | 0  | 0  | 8  |

|           |               |                                                                             |    |    |    |
|-----------|---------------|-----------------------------------------------------------------------------|----|----|----|
| 126116585 | Krt1          | keratin complex 2, basic, gene 1                                            | 3  | 2  | 4  |
| 124487419 | Krt2          | keratin complex 2, basic, gene 17                                           | 4  | 3  | 5  |
| 114145561 | Krt8          | keratin complex 2, basic, gene 8                                            | 33 | 33 | 57 |
| 145580629 | Krt78         | keratin Kb40                                                                | 2  | 2  | 1  |
| 13384696  | Krtcap2       | keratinocyte associated protein 2                                           | 1  | 0  | 0  |
| 31982229  | Khk           | ketoheokinase                                                               | 1  | 0  | 0  |
| 110626031 | Khdrbs1       | KH domain containing, RNA binding, signal transduction associated 1         | 3  | 4  | 3  |
| 18875400  | Khdrbs2       | KH domain-containing, RNA-binding, signal transduction-associated protein 2 | 2  | 1  | 0  |
| 163954948 | Khsrp         | KH-type splicing regulatory protein                                         | 9  | 30 | 3  |
| 9910458   | 0610031J06Rik | kidney predominant protein NCU-G1                                           | 4  | 0  | 1  |
| 85701512  | Gm156         | killer cell lectin-like receptor subfamily H, member 1                      | 0  | 1  | 0  |
| 7549771   | Klra15        | killer cell lectin-like receptor, subfamily A, member 15                    | 0  | 1  | 0  |
| 294661846 | Klra17        | killer cell lectin-like receptor, subfamily A, member 17                    | 1  | 0  | 0  |
| 27777648  | Kdr           | kinase insert domain protein receptor                                       | 0  | 1  | 0  |
| 40254330  | Uhmk1         | kinase interacting stathmin                                                 | 1  | 0  | 0  |
| 144922638 | Ktn1          | kinectin 1                                                                  | 22 | 0  | 2  |
| 120300944 | Kif13a        | kinesin family member 13A                                                   | 1  | 2  | 2  |
| 124487163 | Kif13b        | kinesin family member 13B                                                   | 5  | 6  | 1  |
| 124486927 | Kif14         | kinesin family member 14                                                    | 2  | 0  | 0  |
| 39930325  | Kif15         | kinesin family member 15                                                    | 0  | 1  | 1  |
| 124487287 | Kif16b        | kinesin family member 16B                                                   | 1  | 0  | 0  |
| 86990460  | Kif1b         | kinesin family member 1B isoform b                                          | 0  | 0  | 1  |
| 261862322 | Kif20a        | kinesin family member 20A                                                   | 0  | 1  | 1  |
| 157823795 | Kif21a        | kinesin family member 21A isoform 4                                         | 1  | 0  | 1  |
| 86990454  | Kif21b        | kinesin family member 21B                                                   | 1  | 1  | 1  |
| 21704182  | Kif22         | kinesin family member 22                                                    | 1  | 0  | 0  |
| 147902443 | Kif26a        | kinesin family member 26A                                                   | 1  | 0  | 0  |
| 239582737 | Kif26b        | kinesin family member 26B                                                   | 2  | 0  | 0  |
| 224809373 | Kif2a         | kinesin family member 2A isoform 1                                          | 0  | 3  | 0  |
| 162287089 | Kif4          | kinesin family member 4                                                     | 0  | 1  | 0  |
| 84781727  | Kif5a         | kinesin family member 5A isoform 2                                          | 1  | 0  | 0  |
| 61657921  | Kif5b         | kinesin family member 5B                                                    | 15 | 18 | 12 |
| 45433560  | Kif5c         | kinesin family member 5C                                                    | 5  | 7  | 4  |
| 116642893 | Kifc1         | kinesin family member C1                                                    | 0  | 1  | 0  |
| 117168297 | Kifc2         | kinesin family member C2                                                    | 0  | 2  | 0  |
| 224967075 | Kifc3         | kinesin family member C3 isoform a                                          | 0  | 0  | 1  |
| 131412207 | Klc1          | kinesin light chain 1 isoform 1H                                            | 0  | 2  | 0  |
| 133778983 | Klc2          | kinesin light chain 2                                                       | 0  | 9  | 3  |
| 22122725  | Klc3          | kinesin light chain 3                                                       | 0  | 2  | 0  |
| 13386370  | Klc4          | kinesin light chain 4                                                       | 1  | 0  | 0  |
| 156231029 | Kng2          | kininogen 2 isoform 1                                                       | 0  | 1  | 0  |
| 75677563  | Kank1         | KN motif and ankyrin repeat domains 1                                       | 1  | 0  | 0  |
| 40254257  | Kank4         | KN motif and ankyrin repeat domains 4                                       | 1  | 0  | 0  |
| 157909778 | Kri1          | KRI1 homolog                                                                | 0  | 2  | 0  |
| 226442952 | Krr1          | KRR1, small subunit processome component                                    | 0  | 1  | 0  |
| 205360920 | Kif14         | Kruppel-like factor 14                                                      | 0  | 1  | 0  |
| 144922690 | Kif16         | Kruppel-like factor 16                                                      | 0  | 1  | 0  |
| 170784840 | Kif2          | Kruppel-like factor 2 (lung)                                                | 0  | 1  | 0  |
| 20270210  | Kti12         | KTI12 homolog, chromatin associated                                         | 0  | 1  | 0  |
| 34328234  | Spint1        | Kunitz-type protease inhibitor 1 precursor                                  | 2  | 0  | 0  |
| 19527030  | Kmo           | kynurenine 3-monooxygenase                                                  | 0  | 1  | 0  |
| 124486779 | L3mbtl        | l(3)mbt-like                                                                | 1  | 0  | 0  |

|           |          |                                                                          |    |    |    |
|-----------|----------|--------------------------------------------------------------------------|----|----|----|
| 112293279 | L1cam    | L1 cell adhesion molecule                                                | 1  | 0  | 0  |
| 21703884  | L2hgdh   | L-2-hydroxyglutarate dehydrogenase                                       | 3  | 1  | 0  |
| 111038118 | Hadh     | L-3-hydroxyacyl-Coenzyme A dehydrogenase                                 | 14 | 9  | 2  |
| 226442901 | Larp1    | la related protein                                                       | 2  | 0  | 0  |
| 124358932 | Larp4    | La ribonucleoprotein domain family, member 4 isoform 2                   | 1  | 0  | 1  |
| 110665742 | Larp7    | La ribonucleoprotein domain family, member 7                             | 2  | 3  | 0  |
| 13507666  | Lactb    | lactamase, beta                                                          | 0  | 3  | 0  |
| 144922663 | Lace1    | lactation elevated 1                                                     | 2  | 0  | 0  |
| 238550173 | Lpo      | lactoperoxidase                                                          | 1  | 0  | 0  |
| 31981555  | Lad1     | ladinin                                                                  | 2  | 19 | 2  |
| 22095015  | Lass2    | LAG1 homolog, ceramide synthase 2                                        | 3  | 0  | 0  |
| 162287370 | Lmna     | lamin A isoform C                                                        | 0  | 34 | 51 |
| 229608895 | Lbr      | lamin B receptor                                                         | 1  | 4  | 16 |
| 188219589 | Lmnb1    | lamin B1                                                                 | 0  | 23 | 38 |
| 113195686 | Lmnb2    | lamin B2                                                                 | 0  | 12 | 32 |
| 114326497 | Lamb1-1  | laminin B1 subunit 1                                                     | 24 | 0  | 0  |
| 226423935 | Lama3    | laminin, alpha 3                                                         | 0  | 2  | 0  |
| 124487155 | Lama5    | laminin, alpha 5                                                         | 1  | 0  | 0  |
| 153791270 | Lamc1    | laminin, gamma 1                                                         | 1  | 1  | 0  |
| 19526936  | Lancl2   | LanC (bacterial lantibiotic synthetase component C)-like 2               | 0  | 2  | 3  |
| 22122469  | Lss      | lanosterol synthase                                                      | 4  | 0  | 0  |
| 71979675  | Las1l    | LAS1-like                                                                | 0  | 4  | 1  |
| 46249421  | Ltbp1    | latent transforming growth factor beta binding protein 1 isoform LTBP-1L | 0  | 1  | 1  |
| 31980632  | Lxn      | latexin                                                                  | 2  | 0  | 2  |
| 157739867 | Lphn1    | latrophilin 1 precursor                                                  | 0  | 0  | 1  |
| 124486821 | Lphn2    | latrophilin 2                                                            | 1  | 0  | 0  |
| 124517724 | Lca5l    | Leber congenital amaurosis 5-like                                        | 0  | 0  | 1  |
| 6678682   | Lgals1   | lectin, galactose binding, soluble 1                                     | 5  | 4  | 1  |
| 226531139 | Lgals9   | lectin, galactose binding, soluble 9 isoform 1                           | 0  | 0  | 1  |
| 34328278  | Lman2    | lectin, mannose-binding 2                                                | 9  | 0  | 0  |
| 285026450 | Lman1    | lectin, mannose-binding, 1                                               | 8  | 0  | 0  |
| 7242187   | Lgmn     | legumain                                                                 | 5  | 2  | 2  |
| 165972321 | Lemd2    | LEM domain containing 2                                                  | 0  | 0  | 9  |
| 145864461 | Lemd3    | LEM domain containing 3                                                  | 0  | 0  | 8  |
| 23956410  | Lgsn     | lengsin, lens protein with glutamine synthetase domain                   | 0  | 1  | 0  |
| 19527168  | Psip1    | lens epithelium-derived growth factor                                    | 1  | 19 | 0  |
| 87299619  | Leo1     | Leo1, Paf1/RNA polymerase II complex component, homolog                  | 0  | 6  | 1  |
| 27734076  | Leprel1  | leprecan-like 1                                                          | 2  | 0  | 0  |
| 13386094  | Leprotl1 | leptin receptor overlapping transcript-like 1                            | 1  | 0  | 0  |
| 144922656 | Ligl2    | lethal giant larvae homolog 2                                            | 4  | 23 | 0  |
| 255069715 | Lap3     | leucine aminopeptidase 3                                                 | 7  | 0  | 0  |
| 162417952 | Lrrfip1  | leucine rich repeat (in FLII) interacting protein 1 isoform 1            | 12 | 7  | 0  |
| 258679524 | Lrrfip2  | leucine rich repeat (in FLII) interacting protein 2                      | 0  | 2  | 0  |
| 254675306 | Lrrcc1   | leucine rich repeat and coiled-coil domain containing 1 isoform 3        | 0  | 0  | 1  |
| 30841016  | Lingo1   | leucine rich repeat and Ig domain containing 1                           | 0  | 0  | 1  |
| 40556366  | Lrsam1   | leucine rich repeat and sterile alpha motif containing 1                 | 1  | 0  | 0  |
| 225690585 | Lrrc1    | leucine rich repeat containing 1 isoform 2                               | 3  | 0  | 5  |
| 162287221 | Gm705    | leucine rich repeat containing 10-like                                   | 1  | 0  | 0  |
| 154146185 | Lrrc16a  | leucine rich repeat containing 16A                                       | 1  | 2  | 1  |
| 21553121  | Lrrc3    | leucine rich repeat containing 3                                         | 1  | 0  | 0  |



|           |         |                                                                      |    |    |    |
|-----------|---------|----------------------------------------------------------------------|----|----|----|
| 31542583  | Lrrc33  | leucine rich repeat containing 33                                    | 0  | 1  | 0  |
| 31541911  | Lrrc40  | leucine rich repeat containing 40                                    | 1  | 0  | 1  |
| 41152116  | Lrrc47  | leucine rich repeat containing 47                                    | 2  | 3  | 0  |
| 285026459 | Lrrc56  | leucine rich repeat containing 56                                    | 0  | 1  | 0  |
| 19527026  | Lrrc59  | leucine rich repeat containing 59                                    | 10 | 5  | 6  |
| 40255285  | Lrrc68  | leucine rich repeat containing 68                                    | 1  | 0  | 0  |
| 124486885 | Lrrc7   | leucine rich repeat containing 7                                     | 0  | 0  | 1  |
| 251823957 | Lrrc8e  | leucine rich repeat containing 8 family, member E                    | 0  | 1  | 0  |
| 218505690 | Lrrc9   | leucine rich repeat containing 9 isoform 2                           | 0  | 0  | 1  |
| 47777289  | Lrrn2   | leucine rich repeat protein 2, neuronal                              | 1  | 0  | 0  |
| 33859578  | Lrrn3   | leucine rich repeat protein 3, neuronal                              | 0  | 1  | 0  |
| 27229082  | Lzic    | leucine zipper and CTNNBIP1 domain containing                        | 1  | 0  | 0  |
| 119433663 | Luzp1   | leucine zipper protein 1                                             | 1  | 1  | 1  |
| 167466229 | Luzp4   | leucine zipper protein 4                                             | 0  | 0  | 1  |
| 91208439  | Ncappg2 | leucine zipper protein 5                                             | 1  | 7  | 0  |
| 9789997   | Letm1   | leucine zipper-EF-hand containing transmembrane protein 1            | 17 | 2  | 3  |
| 165905627 | Letm2   | leucine zipper-EF-hand containing transmembrane protein 2            | 0  | 1  | 0  |
| 134031976 | Lrpprc  | leucine-rich PPR motif-containing protein                            | 47 | 29 | 10 |
| 146231954 | Lrrk2   | leucine-rich repeat kinase 2                                         | 1  | 0  | 0  |
| 158517913 | Lrit1   | leucine-rich repeat, immunoglobulin-like and transmembrane domains 1 | 0  | 1  | 1  |
| 88014689  | Lrig1   | leucine-rich repeats and immunoglobulin-like domains 1               | 1  | 0  | 0  |
| 283135157 | Lrig3   | leucine-rich repeats and immunoglobulin-like domains 3               | 0  | 0  | 1  |
| 166851848 | Lrwd1   | leucine-rich repeats and WD repeat domain containing 1               | 0  | 10 | 2  |
| 27370240  | Lnpep   | leucyl/cystinyl aminopeptidase                                       | 10 | 0  | 0  |
| 120537241 | Lars    | leucyl-tRNA synthetase                                               | 2  | 0  | 0  |
| 23346617  | Lars2   | leucyl-tRNA synthetase, mitochondrial                                | 1  | 0  | 0  |
| 21312402  | Leng1   | leukocyte receptor cluster (LRC) member 1                            | 1  | 0  | 0  |
| 30425300  | Leng9   | leukocyte receptor cluster (LRC) member 9                            | 0  | 0  | 1  |
| 27370082  | Leng8   | leukocyte receptor cluster member 8                                  | 0  | 2  | 0  |
| 159032532 | Ltk     | leukocyte receptor tyrosine kinase isoform D precursor               | 1  | 0  | 0  |
| 116734870 | Lta4h   | leukotriene A4 hydrolase                                             | 7  | 0  | 0  |
| 10048442  | Ltb4r2  | leukotriene B4 receptor 2                                            | 1  | 0  | 0  |
| 26080416  | Lpxn    | leupaxin                                                             | 0  | 1  | 0  |
| 253683551 | Lcorl   | ligand dependent nuclear receptor corepressor-like isoform 2         | 0  | 0  | 1  |
| 71061470  | Lig3    | ligase III, DNA, ATP-dependent                                       | 1  | 3  | 0  |
| 6754506   | Large   | like-glycosyltransferase                                             | 1  | 0  | 0  |
| 134053896 | Limch1  | LIM and calponin homology domains 1                                  | 1  | 0  | 1  |
| 21450157  | Lmcd1   | LIM and cysteine-rich domains 1                                      | 0  | 1  | 0  |
| 300863089 | Lims1   | LIM and senescent cell antigen-like domains 1                        | 0  | 1  | 0  |
| 6754508   | Lasp1   | LIM and SH3 protein 1                                                | 8  | 2  | 0  |
| 165905585 | Lima1   | LIM domain and actin binding 1 isoform b                             | 0  | 5  | 21 |
| 164663818 | Ldb1    | LIM domain binding 1 isoform 1                                       | 1  | 0  | 0  |
| 239937458 | Lmo4    | LIM domain only 4                                                    | 0  | 1  | 0  |
| 157311641 | Lmo7    | LIM domain only 7                                                    | 0  | 0  | 18 |
| 6678688   | Lhx1    | LIM homeobox protein 1                                               | 0  | 1  | 0  |
| 89001116  | Lhx3    | LIM homeobox protein 3                                               | 1  | 0  | 0  |
| 77404365  | Limk2   | LIM motif-containing protein kinase 2 isoform b                      | 0  | 1  | 0  |
| 13195646  | Crip2   | LIM only protein HLP                                                 | 5  | 2  | 1  |
| 30425330  | Lsamp   | limbic system-associated membrane protein                            | 1  | 0  | 0  |
| 6754548   | Limk1   | LIM-domain containing, protein kinase                                | 1  | 0  | 0  |

|           |               |                                                                       |    |   |   |
|-----------|---------------|-----------------------------------------------------------------------|----|---|---|
| 124487213 | 4921513D23Rik | limkain b1                                                            | 1  | 1 | 2 |
| 85701728  | Lin7a         | lin 7 homolog a isoform 1                                             | 2  | 4 | 1 |
| 6755973   | Lin7c         | lin 7 homolog c                                                       | 2  | 5 | 3 |
| 30424607  | Lin52         | lin-52 homolog                                                        | 1  | 0 | 0 |
| 30725786  | Lmf2          | lipase maturation factor 2                                            | 1  | 0 | 0 |
| 13277380  | Lias          | lipoic acid synthetase                                                | 0  | 4 | 0 |
| 229577004 | 2610209A20Rik | lipoyl(octanoyl) transferase                                          | 0  | 1 | 0 |
| 268836255 | Pygl          | liver glycogen phosphorylase                                          | 1  | 0 | 0 |
| 123701962 | Lmbrd1        | liver regeneration p-53 related protein                               | 1  | 0 | 0 |
| 257743039 | Ldha          | L-lactate dehydrogenase A isoform 1                                   | 17 | 2 | 2 |
| 7305229   | Ldhc          | L-lactate dehydrogenase C                                             | 2  | 2 | 0 |
| 21313566  | Llph          | LLP homolog                                                           | 0  | 0 | 1 |
| 31982520  | Acadl         | long-chain acyl-CoA dehydrogenase                                     | 14 | 1 | 2 |
| 112293271 | Lor           | loricrin                                                              | 1  | 0 | 0 |
| 113195700 | Ldlr          | low density lipoprotein receptor                                      | 1  | 0 | 1 |
| 124494256 | Lrp1          | low density lipoprotein receptor-related protein 1                    | 2  | 0 | 0 |
| 124487372 | Lrp2          | low density lipoprotein receptor-related protein 2                    | 45 | 4 | 8 |
| 224994223 | Lrp4          | low density lipoprotein receptor-related protein 4 isoform 1          | 2  | 0 | 0 |
| 253314536 | Lrp5          | low density lipoprotein receptor-related protein 5                    | 1  | 0 | 0 |
| 124286870 | Lrp8          | low density lipoprotein receptor-related protein 8 isoform 1          | 1  | 1 | 2 |
| 63999380  | Lrpap1        | low density lipoprotein receptor-related protein associated protein 1 | 4  | 0 | 0 |
| 153792247 | Lrp1b         | low density lipoprotein-related protein 1B                            | 1  | 0 | 1 |
| 117956399 | Lrba          | LPS-responsive beige-like anchor isoform alpha                        | 35 | 3 | 8 |
| 170650601 | Macrocl1      | LRP16 protein                                                         | 7  | 0 | 0 |
| 31711990  | Lsm12         | LSM12 homolog                                                         | 0  | 3 | 0 |
| 23956156  | Lsm14a        | LSM14 homolog A                                                       | 1  | 2 | 0 |
| 13385806  | Lsm3          | LSM3 homolog, U6 small nuclear RNA associated                         | 2  | 3 | 1 |
| 159032056 | Lsm4          | LSM4 homolog, U6 small nuclear RNA associated                         | 1  | 3 | 1 |
| 13384942  | Lsm5          | LSM5 homolog, U6 small nuclear RNA associated                         | 0  | 1 | 0 |
| 300797601 | Lsm6          | LSM6 homolog, U6 small nuclear RNA associated                         | 2  | 4 | 1 |
| 13384714  | Lsm7          | LSM7 homolog, U6 small nuclear RNA associated                         | 3  | 3 | 0 |
| 114158677 | Luc7l         | Luc7 homolog (S. cerevisiae)-like isoform 1                           | 1  | 0 | 1 |
| 283806685 | Luc7l2        | LUC7-like 2                                                           | 1  | 3 | 2 |
| 158937329 | Lnp           | lunapark isoform a                                                    | 2  | 1 | 0 |
| 257467634 | Lba1          | lupus brain antigen 1                                                 | 2  | 0 | 0 |
| 188219567 | Lyar          | Ly1 antibody reactive clone                                           | 2  | 9 | 0 |
| 27753962  | Lypd1         | Ly6/Plaur domain containing 1                                         | 1  | 0 | 0 |
| 31543113  | Lcp1          | lymphocyte cytosolic protein 1                                        | 2  | 3 | 0 |
| 162287383 | Lrmp          | lymphoid-restricted membrane protein                                  | 0  | 1 | 0 |
| 31982233  | Mtdh          | LYRIC                                                                 | 3  | 0 | 0 |
| 26006857  | Kdm4b         | lysine (K)-specific demethylase 4B                                    | 0  | 2 | 0 |
| 285402040 | Kdm4c         | lysine (K)-specific demethylase 4C                                    | 1  | 0 | 1 |
| 23821021  | Lysmd1        | LysM, putative peptidoglycan-binding, domain containing 1 isoform 2   | 0  | 0 | 2 |
| 46402175  | Lpcat4        | lysophosphatidylcholine acyltransferase 4                             | 1  | 0 | 0 |
| 198386326 | Lpgat1        | lysophosphatidylglycerol acyltransferase 1 isoform 2                  | 1  | 0 | 1 |
| 6678760   | Lypla1        | lysophospholipase 1                                                   | 2  | 0 | 0 |
| 7242156   | Lypla2        | lysophospholipase 2                                                   | 1  | 0 | 0 |
| 227496223 | Lyplal1       | lysophospholipase-like 1                                              | 2  | 0 | 0 |
| 113195678 | Lamp1         | lysosomal membrane glycoprotein 1                                     | 6  | 0 | 0 |
| 63054837  | Lamp2         | lysosomal membrane glycoprotein 2 isoform 1                           | 5  | 0 | 0 |

|           |              |                                                               |    |    |   |
|-----------|--------------|---------------------------------------------------------------|----|----|---|
| 195963321 | Kars         | lysyl-tRNA synthetase isoform 2                               | 14 | 4  | 0 |
| 21312048  | Mphosph6     | M phase phosphoprotein 6                                      | 0  | 5  | 1 |
| 133506753 | Mpeg1        | macrophage expressed gene 1                                   | 0  | 1  | 0 |
| 21553093  | Mgl2         | macrophage galactose N-acetyl-galactosamine specific lectin 2 | 0  | 0  | 1 |
| 160707919 | Mfsd6        | macrophage MHC receptor 2 isoform 1                           | 1  | 0  | 0 |
| 6754696   | Mif          | macrophage migration inhibitory factor                        | 2  | 1  | 1 |
| 162463170 | LOC100040259 | macrophage migration inhibitory factor-like                   | 2  | 1  | 1 |
| 6754640   | Marco        | macrophage receptor with collagenous structure                | 0  | 0  | 1 |
| 85861254  | Msr1         | macrophage scavenger receptor 1 isoform a                     | 0  | 1  | 0 |
| 31543224  | Smad4        | MAD homolog 4                                                 | 0  | 2  | 0 |
| 31543218  | Mad2l1       | MAD2 mitotic arrest deficient-like 1                          | 0  | 7  | 1 |
| 254826797 | Mad2l1bp     | MAD2L1 binding protein                                        | 0  | 3  | 0 |
| 12963595  | Ndn12        | mage-g1 protein                                               | 0  | 1  | 1 |
| 256985211 | Magohb       | mago-nashi homolog                                            | 1  | 8  | 8 |
| 27229238  | Mgrn1        | mahogunin, ring finger 1                                      | 2  | 0  | 0 |
| 21313266  | Mfsd1        | major facilitator superfamily domain containing 1             | 1  | 0  | 0 |
| 13386144  | Mfsd10       | major facilitator superfamily domain containing 10            | 2  | 0  | 1 |
| 167900456 | Mfsd4        | major facilitator superfamily domain containing 4 isoform a   | 2  | 0  | 0 |
| 239052674 | Mvp          | major vault protein                                           | 13 | 0  | 0 |
| 33468997  | Mak16        | MAK16 homolog                                                 | 0  | 0  | 1 |
| 21312422  | Nat13        | Mak3p homolog                                                 | 2  | 8  | 0 |
| 30725780  | Mal2         | MAL2 proteolipid protein                                      | 1  | 1  | 1 |
| 254540027 | Mdh1         | malate dehydrogenase 1, NAD (soluble)                         | 11 | 0  | 0 |
| 31982186  | Mdh2         | malate dehydrogenase 2, NAD (mitochondrial)                   | 18 | 16 | 7 |
| 224809552 | Mak          | male germ cell-associated kinase isoform 3                    | 0  | 1  | 0 |
| 188497650 | Mlec         | malectin                                                      | 6  | 0  | 2 |
| 21703972  | Me2          | malic enzyme 2, NAD(+)-dependent, mitochondrial               | 10 | 0  | 0 |
| 21312175  | Mcts1        | malignant T cell amplified sequence 1                         | 0  | 6  | 0 |
| 13384966  | Mcts2        | malignant T cell amplified sequence 2                         | 0  | 3  | 0 |
| 71725343  | Mcat         | malonyl CoA:ACP acyltransferase (mitochondrial)               | 1  | 1  | 0 |
| 56797739  | Mlycd        | malonyl-CoA decarboxylase                                     | 0  | 1  | 0 |
| 300863061 | Mdga2        | MAM domain containing glycosylphosphatidylinositol anchor 2   | 0  | 1  | 0 |
| 91206392  | Mpi          | mannose phosphate isomerase                                   | 1  | 0  | 0 |
| 113930720 | Mrc2         | mannose receptor, C type 2                                    | 0  | 1  | 0 |
| 31560090  | Plbd2        | mannose-6-phosphate protein p76                               | 5  | 0  | 0 |
| 13385312  | M6prbp1      | mannose-6-phosphate receptor binding protein 1                | 8  | 0  | 1 |
| 14916479  | M6pr         | mannose-6-phosphate receptor, cation dependent                | 4  | 0  | 0 |
| 31981340  | Mpdu1        | mannose-P-dolichol utilization defect 1                       | 3  | 0  | 0 |
| 71534295  | Man1b1       | mannosidase, alpha, class 1B, member 1                        | 0  | 0  | 2 |
| 113195690 | Man2b1       | mannosidase, alpha, class 2B, member 1                        | 2  | 2  | 0 |
| 227330625 | Man2b2       | mannosidase, alpha, class 2B, member 2                        | 0  | 0  | 1 |
| 158533990 | Manba        | mannosidase, beta A, lysosomal                                | 9  | 16 | 0 |
| 254540070 | Manbal       | mannosidase, beta A, lysosomal-like                           | 1  | 0  | 0 |
| 22122521  | Mgat2        | mannoside acetylglucosaminyltransferase 2                     | 0  | 1  | 0 |
| 31981106  | Mogs         | mannosyl-oligosaccharide glucosidase                          | 5  | 1  | 2 |
| 13385846  | Mansc1       | MANSC domain containing 1                                     | 0  | 0  | 1 |
| 45544580  | Mapkapk2     | MAP kinase-activated protein kinase 2                         | 1  | 0  | 0 |
| 122937363 | Mark2        | MAP/microtubule affinity-regulating kinase 2 isoform 1        | 3  | 4  | 2 |
| 251823812 | Mark3        | MAP/microtubule affinity-regulating kinase 3 isoform 2        | 1  | 1  | 0 |
| 21703882  | Mbip         | MAP3K12 binding inhibitory protein 1                          | 0  | 3  | 0 |
| 124487457 | Mtap7d2      | MAP7 domain containing 2                                      | 1  | 0  | 0 |

|           |               |                                                                                |    |    |    |
|-----------|---------------|--------------------------------------------------------------------------------|----|----|----|
| 144922676 | Mtap7d3       | MAP7 domain containing 3                                                       | 0  | 0  | 1  |
| 21312626  | 2400003C14Rik | MAPK activating protein PM28                                                   | 0  | 2  | 0  |
| 9910452   | Mapksp1       | MAPK scaffold protein 1                                                        | 4  | 0  | 0  |
| 295148182 | Madd          | MAP-kinase activating death domain                                             | 0  | 2  | 0  |
| 6754706   | Marcksl1      | MARCKS-like 1                                                                  | 1  | 0  | 0  |
| 46430534  | Mrgprb8       | MAS-related GPR, member B8                                                     | 0  | 0  | 1  |
| 85701947  | Gm885         | mast cell antigen 32                                                           | 1  | 0  | 0  |
| 57222238  | Bud31         | maternal G10 transcript                                                        | 0  | 4  | 2  |
| 25141233  | Matr3         | matrin 3                                                                       | 4  | 24 | 31 |
| 7363445   | St14          | matriptase                                                                     | 6  | 0  | 0  |
| 75677470  | Mmp25         | matrix metalloproteinase 25                                                    | 0  | 1  | 0  |
| 160333381 | Mmp8          | matrix metalloproteinase 8                                                     | 0  | 0  | 1  |
| 6678902   | Mmp2          | matrix metalloproteinase 2                                                     | 0  | 1  | 0  |
| 226051848 | Max           | Max protein isoform 1                                                          | 0  | 4  | 0  |
| 20070410  | Med10         | mediator complex subunit 10                                                    | 0  | 5  | 0  |
| 125628662 | Med12         | mediator complex subunit 12                                                    | 0  | 9  | 0  |
| 124286862 | Med13         | mediator complex subunit 13                                                    | 0  | 1  | 0  |
| 253970419 | Med16         | mediator complex subunit 16 isoform 1                                          | 0  | 6  | 0  |
| 21450345  | Med17         | mediator complex subunit 17                                                    | 0  | 2  | 0  |
| 261878547 | Med23         | mediator complex subunit 23                                                    | 0  | 13 | 0  |
| 119220579 | Med24         | mediator complex subunit 24                                                    | 0  | 2  | 0  |
| 27754101  | Med29         | mediator complex subunit 29                                                    | 0  | 1  | 0  |
| 19882231  | Med30         | mediator complex subunit 30                                                    | 0  | 3  | 0  |
| 157266324 | Med7          | mediator complex subunit 7                                                     | 0  | 3  | 0  |
| 132626693 | Mdc1          | mediator of DNA damage checkpoint 1                                            | 0  | 10 | 1  |
| 27754138  | Med11         | mediator of RNA polymerase II transcription, subunit 11 homolog                | 0  | 3  | 1  |
| 21313064  | Med18         | mediator of RNA polymerase II transcription, subunit 18 homolog                | 0  | 3  | 0  |
| 21313194  | Med19         | mediator of RNA polymerase II transcription, subunit 19                        | 0  | 2  | 0  |
| 56119162  | Med31         | mediator of RNA polymerase II transcription, subunit 31 homolog                | 0  | 2  | 1  |
| 114155155 | Med8          | mediator of RNA polymerase II transcription, subunit 8 homolog isoform 1       | 0  | 1  | 0  |
| 6680618   | Acadm         | medium-chain acyl-CoA dehydrogenase                                            | 17 | 5  | 1  |
| 6678908   | Mns1          | meiosis-specific nuclear structural protein 1                                  | 0  | 0  | 1  |
| 9055282   | Mre11a        | meiotic recombination 11 homolog A                                             | 0  | 10 | 0  |
| 110625785 | Mlana         | melan-A                                                                        | 0  | 1  | 1  |
| 11096332  | Myg1          | melanocyte proliferating gene 1                                                | 2  | 0  | 0  |
| 9789935   | Maged1        | melanoma antigen family D, 1                                                   | 0  | 1  | 0  |
| 111378377 | Magee1        | melanoma antigen, family E, 1                                                  | 0  | 0  | 1  |
| 124001582 | Mia3          | melanoma inhibitory activity 3                                                 | 7  | 0  | 0  |
| 53759066  | ORF61         | membralin                                                                      | 2  | 0  | 0  |
| 134031999 | Magi1         | membrane associated guanylate kinase, WW and PDZ domain containing 1 isoform c | 0  | 2  | 2  |
| 226823238 | Magi3         | membrane associated guanylate kinase, WW and PDZ domain containing 3 isoform 2 | 0  | 0  | 1  |
| 23956314  | Mboat1        | membrane bound O-acyltransferase domain containing 1                           | 1  | 0  | 0  |
| 22122803  | Mmgt1         | membrane magnesium transporter 1                                               | 2  | 0  | 0  |
| 58037337  | Paqr5         | membrane progesterin receptor gamma                                            | 1  | 0  | 0  |
| 300193009 | Kirrel3       | membrane protein mKirre                                                        | 0  | 1  | 0  |
| 9625023   | Mpp5          | membrane protein, palmitoylated 3 (MAGUK p55 subfamily member 5)               | 0  | 0  | 4  |

|           |          |                                                                  |    |    |    |
|-----------|----------|------------------------------------------------------------------|----|----|----|
| 257900520 | Mpp6     | membrane protein, palmitoylated 3 (MAGUK p55 subfamily member 6) | 0  | 2  | 1  |
| 162287100 | Mpp4     | membrane protein, palmitoylated 4                                | 1  | 1  | 0  |
| 239051572 | Mpp7     | membrane protein, palmitoylated 7 isoform 1                      | 13 | 13 | 2  |
| 257095992 | Pdzk1ip1 | membrane-associated protein 17                                   | 1  | 0  | 0  |
| 256773303 | March5   | membrane-associated ring finger (C3HC4) 5                        | 3  | 0  | 1  |
| 10181210  | March7   | membrane-associated ring finger (C3HC4) 7                        | 1  | 0  | 0  |
| 213385280 | March10  | membrane-associated ring finger 10 isoform 1                     | 0  | 1  | 0  |
| 22128653  | Mfrp     | membrane-type frizzled-related protein                           | 0  | 0  | 1  |
| 89363038  | Mnat1    | menage a trois 1                                                 | 0  | 1  | 0  |
| 110625813 | Manf     | mesencephalic astrocyte-derived neurotrophic factor              | 0  | 9  | 0  |
| 228480219 | Mesdc2   | mesoderm development candidate 2                                 | 3  | 0  | 0  |
| 6678866   | Mest     | mesoderm specific transcript                                     | 0  | 1  | 0  |
| 9256568   | Msln     | mesothelin                                                       | 1  | 0  | 0  |
| 7305285   | Mt1      | metallothionein 1                                                | 1  | 0  | 0  |
| 33468863  | Mt2      | metallothionein 2                                                | 0  | 1  | 0  |
| 7305287   | Mt3      | metallothionein 3                                                | 0  | 0  | 1  |
| 91598896  | Mta1     | metastasis associated 1                                          | 0  | 3  | 5  |
| 283806541 | Mta3     | metastasis associated 3                                          | 0  | 7  | 0  |
| 51491880  | Mta2     | metastasis-associated gene family, member 2                      | 1  | 15 | 10 |
| 241982742 | Mtx1     | metaxin 1 isoform 1                                              | 7  | 0  | 9  |
| 228480241 | Mtx2     | metaxin 2                                                        | 6  | 0  | 9  |
| 21704144  | Mat2a    | methionine adenosyltransferase II, alpha                         | 3  | 0  | 0  |
| 313482787 | Mat2b    | methionine adenosyltransferase II, beta                          | 3  | 0  | 0  |
| 9789873   | Metap2   | methionine aminopeptidase 2                                      | 1  | 2  | 0  |
| 21313208  | Msrb2    | methionine sulfoxide reductase B2                                | 0  | 1  | 0  |
| 51491852  | Mars     | methionine-tRNA synthetase                                       | 5  | 2  | 0  |
| 28202007  | Metap1   | methionyl aminopeptidase 1                                       | 0  | 6  | 0  |
| 126517469 | Mecp2    | methyl CpG binding protein 2 isoform 2                           | 0  | 12 | 2  |
| 157817372 | Mbd1     | methyl-CpG binding domain protein 1                              | 0  | 1  | 0  |
| 218931229 | Mbd2     | methyl-CpG binding domain protein 2                              | 2  | 3  | 2  |
| 7305261   | Mbd3     | methyl-CpG binding domain protein 3                              | 0  | 5  | 3  |
| 119433655 | Mbd5     | methyl-CpG binding domain protein 5                              | 1  | 0  | 0  |
| 186700620 | Mccc1    | methylcrotonoyl-Coenzyme A carboxylase 1 (alpha)                 | 4  | 0  | 0  |
| 73622267  | Mccc2    | methylcrotonoyl-Coenzyme A carboxylase 2 (beta)                  | 8  | 1  | 0  |
| 283135114 | Mthfd1l  | methylenetetrahydrofolate dehydrogenase (NADP+ dependent) 1-like | 14 | 14 | 1  |
| 261878543 | Mthfd1   | methylenetetrahydrofolate dehydrogenase 1                        | 21 | 10 | 0  |
| 6678952   | Mthfd2   | methylenetetrahydrofolate dehydrogenase 2                        | 0  | 1  | 0  |
| 21313396  | Mmab     | methylmalonic aciduria (cobalamin deficiency) type B homolog     | 0  | 2  | 0  |
| 148540106 | Mut      | methylmalonyl-Coenzyme A mutase                                  | 12 | 0  | 0  |
| 21312938  | Mett10d  | methyltransferase 10 domain containing                           | 1  | 0  | 0  |
| 27229243  | Mett5d1  | methyltransferase 5 domain containing 1                          | 1  | 1  | 0  |
| 221139873 | Mettl11b | methyltransferase like 11B                                       | 1  | 1  | 0  |
| 13385728  | Mfap1a   | microfibrillar-associated protein 1A                             | 1  | 5  | 5  |
| 295844817 | Mitf     | microphthalmia-associated transcription factor isoform 2         | 0  | 1  | 0  |
| 226529982 | Morc2a   | microorchidia 2A isoform 2                                       | 0  | 1  | 1  |
| 255003723 | Morc3    | microorchidia 3                                                  | 0  | 1  | 1  |
| 13385010  | Mgst3    | microsomal glutathione S-transferase 3                           | 1  | 0  | 4  |
| 254540223 | Mttp     | microsomal triglyceride transfer protein isoform 2               | 1  | 0  | 0  |
| 31980615  | Mcrs1    | microspherule protein 1                                          | 0  | 2  | 0  |
| 312433957 | Macf1    | microtubule-actin crosslinking factor 1                          | 8  | 33 | 3  |

|           |               |                                                                       |    |    |    |
|-----------|---------------|-----------------------------------------------------------------------|----|----|----|
| 291045426 | Mtap1a        | microtubule-associated protein 1 A                                    | 0  | 1  | 0  |
| 171543853 | Mtap1b        | microtubule-associated protein 1B                                     | 1  | 0  | 0  |
| 148747189 | Mtap4         | microtubule-associated protein 4                                      | 6  | 4  | 0  |
| 124486997 | Mtap9         | microtubule-associated protein 9                                      | 1  | 1  | 0  |
| 7106301   | Mapre1        | microtubule-associated protein, RP/EB family, member 1                | 2  | 7  | 0  |
| 124487133 | Mdn1          | midasin                                                               | 2  | 4  | 1  |
| 109627648 | Mcm3ap        | minichromosome maintenance complex component 3 associated protein     | 0  | 1  | 1  |
| 255918149 | Mcm4          | minichromosome maintenance complex component 4                        | 20 | 9  | 4  |
| 6678832   | Mcm6          | minichromosome maintenance complex component 6                        | 28 | 5  | 5  |
| 10242373  | Mcm7          | minichromosome maintenance complex component 7                        | 28 | 7  | 8  |
| 86439953  | Mcm9          | minichromosome maintenance complex component 9                        | 0  | 0  | 1  |
| 172088119 | Mcm2          | minichromosome maintenance deficient 2 mitotin                        | 29 | 8  | 4  |
| 33859484  | Mcm3          | minichromosome maintenance deficient 3                                | 33 | 12 | 3  |
| 112293273 | Mcm5          | minichromosome maintenance deficient 5, cell division cycle 46        | 23 | 10 | 7  |
| 31542008  | Mcm8          | minichromosome maintenance deficient 8                                | 0  | 0  | 1  |
| 30794474  | Mrps7         | mitochondrial ribosomal protein S7                                    | 3  | 2  | 1  |
| 13385012  | Magmas        | mitochondria-associated granulocyte macrophage CSF signaling molecule | 3  | 2  | 2  |
| 329755292 | Mavs          | mitochondrial antiviral signaling protein                             | 4  | 0  | 3  |
| 31980648  | Atp5b         | mitochondrial ATP synthase beta subunit                               | 36 | 14 | 23 |
| 256355222 | Slc25a25      | mitochondrial Ca <sup>2+</sup> -dependent solute carrier              | 0  | 0  | 1  |
| 158749545 | Slc25a40      | mitochondrial carrier family protein                                  | 1  | 0  | 0  |
| 9845273   | Mtch1         | mitochondrial carrier homolog 1                                       | 2  | 0  | 6  |
| 9790055   | Mtch2         | mitochondrial carrier homolog 2                                       | 8  | 1  | 11 |
| 254692847 | AU042651      | mitochondrial carrier protein-like                                    | 4  | 0  | 0  |
| 281332113 | Polrmt        | mitochondrial DNA-directed RNA polymerase                             | 0  | 1  | 0  |
| 34536827  | Gpam          | mitochondrial glycerol 3-phosphate acyltransferase                    | 0  | 1  | 0  |
| 38490690  | lars2         | mitochondrial isoleucine tRNA synthetase                              | 9  | 0  | 0  |
| 9790049   | 2610024G14Rik | mitochondrial nitric oxide synthase                                   | 0  | 1  | 0  |
| 28077029  | Pck2          | mitochondrial phosphoenolpyruvate carboxykinase 2                     | 12 | 0  | 3  |
| 95113671  | Pmpcb         | mitochondrial processing peptidase beta subunit                       | 2  | 0  | 0  |
| 254039729 | Rhot1         | mitochondrial Rho 1 isoform 1                                         | 3  | 0  | 1  |
| 84875532  | Mrpl1         | mitochondrial ribosomal protein L1 isoform 2                          | 8  | 5  | 1  |
| 13385658  | Mrpl10        | mitochondrial ribosomal protein L10                                   | 3  | 2  | 1  |
| 13384980  | Mrpl11        | mitochondrial ribosomal protein L11                                   | 5  | 7  | 0  |
| 22164792  | Mrpl12        | mitochondrial ribosomal protein L12                                   | 4  | 5  | 2  |
| 21312936  | Mrpl13        | mitochondrial ribosomal protein L13                                   | 0  | 3  | 0  |
| 21312028  | Mrpl14        | mitochondrial ribosomal protein L14                                   | 2  | 2  | 0  |
| 33468983  | Mrpl15        | mitochondrial ribosomal protein L15                                   | 2  | 0  | 0  |
| 19424352  | Mrpl16        | mitochondrial ribosomal protein L16                                   | 1  | 0  | 1  |
| 13384658  | Mrpl17        | mitochondrial ribosomal protein L17                                   | 0  | 1  | 0  |
| 13385808  | Mrpl18        | mitochondrial ribosomal protein L18                                   | 0  | 6  | 0  |
| 13385976  | Mrpl19        | mitochondrial ribosomal protein L19                                   | 1  | 1  | 0  |
| 13384660  | Mrpl2         | mitochondrial ribosomal protein L2                                    | 1  | 0  | 1  |
| 20270194  | Mrpl20        | mitochondrial ribosomal protein L20                                   | 2  | 2  | 0  |
| 31982032  | Mrpl21        | mitochondrial ribosomal protein L21                                   | 2  | 4  | 0  |
| 262263310 | Mrpl22        | mitochondrial ribosomal protein L22                                   | 2  | 5  | 0  |
| 6755352   | Mrpl23        | mitochondrial ribosomal protein L23                                   | 5  | 6  | 0  |
| 16716447  | Mrpl27        | mitochondrial ribosomal protein L27                                   | 4  | 2  | 0  |
| 31981470  | Mrpl3         | mitochondrial ribosomal protein L3                                    | 1  | 0  | 0  |
| 21312302  | Mrpl30        | mitochondrial ribosomal protein L30                                   | 0  | 1  | 0  |

|           |         |                                                        |    |    |    |
|-----------|---------|--------------------------------------------------------|----|----|----|
| 16716449  | Mrpl34  | mitochondrial ribosomal protein L34                    | 2  | 1  | 0  |
| 22128625  | Mrpl37  | mitochondrial ribosomal protein L37                    | 0  | 1  | 0  |
| 124430535 | Mrpl38  | mitochondrial ribosomal protein L38                    | 3  | 2  | 0  |
| 31560438  | Mrpl39  | mitochondrial ribosomal protein L39                    | 3  | 1  | 0  |
| 119508437 | Mrpl4   | mitochondrial ribosomal protein L4                     | 1  | 3  | 0  |
| 255003746 | Mrpl40  | mitochondrial ribosomal protein L40                    | 2  | 2  | 0  |
| 113461980 | Mrpl41  | mitochondrial ribosomal protein L41                    | 1  | 2  | 0  |
| 17298676  | Mrpl43  | mitochondrial ribosomal protein L43                    | 0  | 1  | 0  |
| 124487075 | Mrpl44  | mitochondrial ribosomal protein L44                    | 4  | 2  | 1  |
| 12963643  | Mrpl46  | mitochondrial ribosomal protein L46                    | 1  | 2  | 1  |
| 29826332  | Mrpl47  | mitochondrial ribosomal protein L47                    | 1  | 4  | 0  |
| 148368964 | Mrpl48  | mitochondrial ribosomal protein L48                    | 1  | 3  | 0  |
| 13385752  | Mrpl49  | mitochondrial ribosomal protein L49                    | 3  | 3  | 0  |
| 13385050  | Mrpl51  | mitochondrial ribosomal protein L51                    | 1  | 1  | 1  |
| 21313040  | Mrpl53  | mitochondrial ribosomal protein L53                    | 3  | 3  | 0  |
| 21313400  | Mrpl55  | mitochondrial ribosomal protein L55                    | 2  | 1  | 1  |
| 29789253  | Mrpl9   | mitochondrial ribosomal protein L9                     | 2  | 2  | 0  |
| 226246598 | Mrps10  | mitochondrial ribosomal protein S10 isoform 3          | 4  | 5  | 0  |
| 13384894  | Mrps14  | mitochondrial ribosomal protein S14                    | 1  | 1  | 0  |
| 48526512  | Mrps15  | mitochondrial ribosomal protein S15                    | 5  | 1  | 0  |
| 13384844  | Mrps16  | mitochondrial ribosomal protein S16                    | 2  | 0  | 0  |
| 13384854  | Mrps17  | mitochondrial ribosomal protein S17                    | 0  | 2  | 0  |
| 17505206  | Mrps18a | mitochondrial ribosomal protein S18A                   | 0  | 1  | 0  |
| 23956152  | Mrps18b | mitochondrial ribosomal protein S18B                   | 0  | 1  | 0  |
| 58037129  | Mrps18c | mitochondrial ribosomal protein S18C                   | 0  | 1  | 0  |
| 260593698 | Mrps2   | mitochondrial ribosomal protein S2                     | 2  | 3  | 0  |
| 17505220  | Mrps21  | mitochondrial ribosomal protein S21                    | 2  | 1  | 0  |
| 27228982  | Mrps23  | mitochondrial ribosomal protein S23                    | 3  | 7  | 1  |
| 13385578  | Mrps24  | mitochondrial ribosomal protein S24                    | 1  | 2  | 0  |
| 31981257  | Mrps25  | mitochondrial ribosomal protein S25                    | 1  | 1  | 0  |
| 46402169  | Mrps26  | mitochondrial ribosomal protein S26                    | 4  | 4  | 0  |
| 50980303  | Mrps27  | mitochondrial ribosomal protein S27                    | 1  | 0  | 0  |
| 254587936 | Mrps28  | mitochondrial ribosomal protein S28                    | 2  | 2  | 1  |
| 29789128  | Mrps30  | mitochondrial ribosomal protein S30                    | 2  | 1  | 0  |
| 10181116  | Mrps31  | mitochondrial ribosomal protein S31                    | 3  | 3  | 1  |
| 33859564  | Mrps33  | mitochondrial ribosomal protein S33 isoform 1          | 1  | 1  | 0  |
| 13385670  | Mrps34  | mitochondrial ribosomal protein S34                    | 3  | 2  | 0  |
| 148235701 | Mrps35  | mitochondrial ribosomal protein S35                    | 3  | 3  | 0  |
| 298286543 | Mrps36  | mitochondrial ribosomal protein S36                    | 1  | 0  | 0  |
| 17157985  | Mrps5   | mitochondrial ribosomal protein S5                     | 2  | 1  | 0  |
| 23956244  | Mrps6   | mitochondrial ribosomal protein S6                     | 3  | 1  | 0  |
| 169790909 | Mrps9   | mitochondrial ribosomal protein S9                     | 4  | 0  | 1  |
| 21312752  | Mrrf    | mitochondrial ribosome recycling factor                | 1  | 8  | 0  |
| 29789289  | Echs1   | mitochondrial short-chain enoyl-coenzyme A hydratase 1 | 8  | 6  | 1  |
| 110625866 | Mtif2   | mitochondrial translational initiation factor 2        | 1  | 1  | 0  |
| 33859811  | Hadha   | mitochondrial trifunctional protein, alpha subunit     | 31 | 18 | 22 |
| 21704100  | Hadhb   | mitochondrial trifunctional protein, beta subunit      | 15 | 9  | 7  |
| 31543952  | Wars2   | mitochondrial tryptophanyl tRNA synthetase 2           | 0  | 1  | 0  |
| 111074538 | Mtus1   | mitochondrial tumor suppressor 1 isoform 1             | 1  | 1  | 1  |
| 244793488 | Mfn1    | mitofusin 1                                            | 1  | 0  | 0  |
| 21489933  | Mapk3   | mitogen activated protein kinase 3                     | 4  | 0  | 1  |
| 89257354  | Map3k2  | mitogen activated protein kinase kinase kinase 2       | 0  | 1  | 0  |
| 93102421  | Map3k4  | mitogen activated protein kinase kinase kinase 4       | 2  | 0  | 0  |

|           |               |                                                                  |    |    |   |
|-----------|---------------|------------------------------------------------------------------|----|----|---|
| 84579909  | Mapk1         | mitogen-activated protein kinase 1                               | 6  | 7  | 0 |
| 226246627 | Mapk13        | mitogen-activated protein kinase 13                              | 0  | 3  | 0 |
| 270341386 | Mapk14        | mitogen-activated protein kinase 14                              | 1  | 0  | 0 |
| 6678794   | Map2k1        | mitogen-activated protein kinase kinase 1                        | 2  | 0  | 0 |
| 6754624   | Map2k5        | mitogen-activated protein kinase kinase 5                        | 0  | 0  | 1 |
| 31543234  | Map3k11       | mitogen-activated protein kinase kinase kinase 11                | 1  | 0  | 0 |
| 171846249 | Map3k5        | mitogen-activated protein kinase kinase kinase 5                 | 0  | 1  | 0 |
| 124486875 | Map4k3        | mitogen-activated protein kinase kinase kinase kinase 3          | 0  | 1  | 0 |
| 77736537  | Map4k5        | mitogen-activated protein kinase kinase kinase kinase 5          | 0  | 3  | 0 |
| 88014564  | Mad111        | mitotic arrest deficient 1-like 1                                | 0  | 10 | 1 |
| 224809384 | Mki67ip       | Mki67 (FHA domain) interacting nucleolar phosphoprotein          | 0  | 0  | 5 |
| 237820633 | Mki2          | MKL/myocardin-like 2 isoform 3                                   | 1  | 1  | 0 |
| 62412947  | Mobk1a        | MOB1, Mps One Binder kinase activator-like 1A                    | 1  | 0  | 0 |
| 124486921 | Mosc1         | MOCO sulphurase C-terminal domain containing 1                   | 1  | 0  | 0 |
| 19526848  | Mosc2         | MOCO sulphurase C-terminal domain containing 2                   | 5  | 0  | 4 |
| 62243852  | Sltm          | modulator of estrogen induced transcription isoform a            | 0  | 11 | 1 |
| 70778915  | Msn           | moesin                                                           | 5  | 12 | 0 |
| 254540183 | Mov10         | Moloney leukemia virus 10 isoform b                              | 1  | 0  | 0 |
| 161484622 | Mocs1         | molybdenum cofactor synthesis 1 isoform 2                        | 2  | 0  | 0 |
| 164664484 | Mocs2         | molybdopterin synthase isoform Mocs2B                            | 0  | 1  | 0 |
| 253683424 | Mon2          | MON2 homolog isoform 3                                           | 1  | 0  | 3 |
| 255759902 | Maoa          | monoamine oxidase A                                              | 6  | 0  | 2 |
| 261878516 | Mgll          | monoglyceride lipase                                             | 1  | 0  | 0 |
| 7106359   | Morc1         | MORC                                                             | 1  | 0  | 1 |
| 85540473  | Morf4l1       | mortality factor 4 like 1 isoform b                              | 0  | 11 | 0 |
| 170295836 | Trim59        | mouse RING finger 1                                              | 1  | 0  | 0 |
| 133505571 | Kif20b        | M-phase phosphoprotein 1                                         | 0  | 0  | 1 |
| 68303650  | Mphosph10     | M-phase phosphoprotein 10 (U3 small nucleolar ribonucleoprotein) | 1  | 1  | 6 |
| 225543402 | Mphosph8      | M-phase phosphoprotein, mpp8                                     | 0  | 0  | 3 |
| 146134497 | Mpnd          | MPN domain containing                                            | 0  | 2  | 0 |
| 110625965 | 1600027N09Rik | MRG-binding protein                                              | 0  | 2  | 0 |
| 171906591 | Mterfd1       | MTERF domain containing 1                                        | 0  | 1  | 0 |
| 7305293   | Muc1          | mucin 1, transmembrane                                           | 1  | 1  | 5 |
| 167736365 | Muc4          | mucin 4                                                          | 7  | 0  | 0 |
| 16716463  | Mcoln1        | mucopolipin 1                                                    | 0  | 0  | 1 |
| 27370250  | Malt1         | mucosa associated lymphoid tissue lymphoma translocation gene 1  | 1  | 0  | 0 |
| 254588077 | Mmrn1         | multimerin 1                                                     | 0  | 0  | 1 |
| 85701536  | Mctp2         | multiple C2 domains, transmembrane 2                             | 0  | 1  | 0 |
| 28827786  | Mcf2          | multiple coagulation factor deficiency 2 isoform 1               | 1  | 0  | 0 |
| 270309153 | Men1          | multiple endocrine neoplasia 1                                   | 0  | 5  | 0 |
| 31982171  | Mug1          | murinoglobulin 1                                                 | 0  | 1  | 0 |
| 17157989  | Msi2          | Musashi homolog 2                                                | 6  | 4  | 4 |
| 153792649 | Myh3          | muscle embryonic myosin heavy chain 3                            | 0  | 1  | 0 |
| 6755256   | Pygm          | muscle glycogen phosphorylase                                    | 0  | 1  | 0 |
| 37537520  | Mrto4         | muscle protein684                                                | 0  | 2  | 1 |
| 46411182  | Mbnl1         | muscleblind-like 1                                               | 1  | 4  | 0 |
| 6754740   | Msc           | musculin                                                         | 1  | 1  | 1 |
| 7305271   | Mklin1        | muskelin 1, intracellular mediator containing kelch motifs       | 1  | 0  | 0 |
| 145699135 | Mcc           | mutated in colorectal cancers isoform 1                          | 1  | 0  | 1 |
| 20532342  | Muted         | muted                                                            | 1  | 0  | 0 |
| 6678938   | Msh2          | mutS homolog 2                                                   | 11 | 0  | 1 |



|           |               |                                                                                                 |    |    |     |
|-----------|---------------|-------------------------------------------------------------------------------------------------|----|----|-----|
| 6754744   | Msh6          | mutS homolog 6                                                                                  | 4  | 0  | 0   |
| 31982724  | Mybbp1a       | MYB binding protein (P160) 1a                                                                   | 1  | 78 | 35  |
| 256355182 | Mina          | myc induced nuclear antigen                                                                     | 1  | 1  | 0   |
| 114155153 | Maz           | MYC-associated zinc finger protein                                                              | 0  | 1  | 0   |
| 244790095 | Myef2         | myelin basic protein expression factor 2, repressor isoform 2                                   | 0  | 12 | 8   |
| 49457857  | Mpz1          | myelin protein zero-like 1 isoform a                                                            | 0  | 0  | 1   |
| 148271079 | Myt1l         | myelin transcription factor 1-like isoform 3                                                    | 0  | 0  | 1   |
| 6678824   | Mcl1          | myeloid cell leukemia sequence 1                                                                | 1  | 0  | 0   |
| 6678978   | Myd116        | myeloid differentiation primary response gene 116                                               | 1  | 0  | 0   |
| 145587092 | Mllt4         | myeloid/lymphoid or mixed lineage-leukemia translocation to 4 homolog                           | 3  | 7  | 4   |
| 11612511  | Mllt1         | myeloid/lymphoid or mixed-lineage leukemia (trithorax homolog, Drosophila); translocated to, 1  | 0  | 0  | 1   |
| 47271507  | Mllt10        | myeloid/lymphoid or mixed-lineage leukemia (trithorax homolog, Drosophila); translocated to, 10 | 0  | 0  | 1   |
| 124486682 | Mll1          | myeloid/lymphoid or mixed-lineage leukemia 1                                                    | 0  | 2  | 0   |
| 124487063 | Mll3          | myeloid/lymphoid or mixed-lineage leukemia 3                                                    | 0  | 2  | 0   |
| 148271073 | Myadm         | myeloid-associated differentiation marker                                                       | 1  | 0  | 2   |
| 76253934  | Mef2a         | myocyte enhancer factor 2A                                                                      | 0  | 1  | 0   |
| 153791796 | Myof          | myoferlin                                                                                       | 24 | 2  | 0   |
| 12963757  | Isyna1        | myo-inositol 1-phosphate synthase A1                                                            | 4  | 0  | 0   |
| 145279198 | Myom1         | myomesin 1 isoform 1                                                                            | 1  | 0  | 0   |
| 147906795 | Myom3         | myomesin family, member 3                                                                       | 0  | 1  | 0   |
| 33598964  | Myh10         | myosin heavy chain 10, non-muscle                                                               | 19 | 11 | 57  |
| 124487037 | Myo1a         | myosin IA                                                                                       | 0  | 1  | 0   |
| 240120042 | Myo1b         | myosin IB isoform 2                                                                             | 0  | 1  | 3   |
| 124494244 | Myo1c         | myosin IC isoform a                                                                             | 1  | 14 | 40  |
| 118026911 | Myo1d         | myosin ID                                                                                       | 1  | 0  | 24  |
| 68299824  | Myo1e         | myosin IE                                                                                       | 0  | 0  | 3   |
| 255069756 | Myo1f         | myosin IF                                                                                       | 1  | 0  | 2   |
| 266458101 | Myo1g         | myosin IG                                                                                       | 0  | 1  | 1   |
| 291219940 | Myo3a         | myosin IIIA                                                                                     | 0  | 0  | 1   |
| 215272384 | Myo9b         | myosin IXb isoform 1                                                                            | 1  | 1  | 0   |
| 71037403  | 2900073G15Rik | myosin light chain, regulatory B-like                                                           | 5  | 9  | 7   |
| 198278553 | Myl9          | myosin regulatory light polypeptide 9                                                           | 1  | 1  | 1   |
| 115511052 | Myo5a         | myosin Va                                                                                       | 0  | 1  | 2   |
| 46399202  | Myo5b         | myosin Vb                                                                                       | 0  | 0  | 5   |
| 124486759 | Myo5c         | myosin VC                                                                                       | 1  | 2  | 11  |
| 261823961 | Myo6          | myosin VI                                                                                       | 11 | 18 | 39  |
| 115511010 | Myo7a         | myosin VIIa                                                                                     | 0  | 1  | 0   |
| 261823963 | Myo7b         | myosin VIIB                                                                                     | 0  | 1  | 0   |
| 157041248 | Myo15         | myosin XV isoform 1                                                                             | 2  | 0  | 1   |
| 22094119  | Myo18a        | myosin XVIIIa                                                                                   | 1  | 36 | 2   |
| 124486959 | Myh13         | myosin, heavy polypeptide 13, skeletal muscle                                                   | 2  | 0  | 1   |
| 29336026  | Myh14         | myosin, heavy polypeptide 14                                                                    | 9  | 5  | 7   |
| 67189167  | Myh4          | myosin, heavy polypeptide 4, skeletal muscle                                                    | 0  | 1  | 1   |
| 255918225 | Myh6          | myosin, heavy polypeptide 6, cardiac muscle, alpha                                              | 0  | 1  | 3   |
| 71143152  | Myh8          | myosin, heavy polypeptide 8, skeletal muscle, perinatal                                         | 0  | 1  | 0   |
| 114326446 | Myh9          | myosin, heavy polypeptide 9, non-muscle isoform 1                                               | 85 | 55 | 106 |
| 21728376  | Myl12b        | myosin, light chain 12B, regulatory                                                             | 1  | 1  | 1   |
| 33620739  | Myl6          | myosin, light polypeptide 6, alkali, smooth muscle and non-muscle                               | 1  | 8  | 9   |
| 26986555  | Myl6b         | myosin, light polypeptide 6B                                                                    | 0  | 0  | 2   |

|           |               |                                                                       |    |    |    |
|-----------|---------------|-----------------------------------------------------------------------|----|----|----|
| 114326499 | Myl7          | myosin, light polypeptide 7, regulatory                               | 1  | 1  | 1  |
| 126157499 | Mylk          | myosin, light polypeptide kinase                                      | 0  | 20 | 2  |
| 6679961   | Mtpn          | myotrophin                                                            | 1  | 0  | 0  |
| 224994246 | Mttr11        | myotubularin related protein 11                                       | 0  | 0  | 1  |
| 33563378  | Mttr9         | myotubularin related protein 9                                        | 1  | 0  | 1  |
| 6678768   | Marcks        | myristoylated alanine rich protein kinase C substrate                 | 6  | 0  | 0  |
| 124487239 | Myst3         | MYST histone acetyltransferase (monocytic leukemia) 3                 | 1  | 0  | 0  |
| 21312790  | Myst1         | MYST histone acetyltransferase 1                                      | 0  | 5  | 0  |
| 303521989 | Myst2         | MYST histone acetyltransferase 2                                      | 0  | 1  | 4  |
| 6996930   | Mx1           | myxovirus (influenza virus) resistance 1                              | 0  | 1  | 0  |
| 229608908 | 1190005F20Rik | N2,N2-dimethylguanosine tRNA methyltransferase-like                   | 0  | 1  | 0  |
| 21450277  | Atp1a1        | Na+/K+ -ATPase alpha 1 subunit                                        | 24 | 6  | 12 |
| 21450321  | Atp1a3        | Na+/K+ -ATPase alpha 3 subunit                                        | 9  | 3  | 7  |
| 6753138   | Atp1b1        | Na+/K+ -ATPase beta 1 subunit                                         | 9  | 0  | 4  |
| 168693635 | Naga          | N-acetyl galactosaminidase, alpha                                     | 10 | 27 | 2  |
| 52138552  | Naalad2       | N-acetylated alpha-linked acidic dipeptidase 2                        | 0  | 0  | 1  |
| 158749624 | Galnt5        | N-acetylgalactosaminyltransferase 5                                   | 0  | 0  | 1  |
| 84579827  | Gnptab        | N-acetylglucosamine-1-phosphate transferase                           | 0  | 1  | 1  |
| 16716467  | Nans          | N-acetylneuraminic acid synthase                                      | 3  | 0  | 0  |
| 23346561  | Nat10         | N-acetyltransferase 10                                                | 1  | 22 | 7  |
| 112821677 | Nlrp2         | NACHT, leucine rich repeat and PYD containing 2                       | 1  | 1  | 2  |
| 9790019   | Asah1         | N-acylsphingosine amidohydrolase 1                                    | 17 | 11 | 5  |
| 31982437  | Nsdhl         | NAD(P) dependent steroid dehydrogenase-like                           | 11 | 0  | 0  |
| 94400773  | Nqo1          | NAD(P)H dehydrogenase, quinone 1                                      | 7  | 0  | 2  |
| 253795455 | Nqo2          | NAD(P)H dehydrogenase, quinone 2 isoform 1                            | 1  | 0  | 0  |
| 13195624  | Ndufa10       | NADH dehydrogenase (ubiquinone) 1 alpha subcomplex 10                 | 9  | 1  | 10 |
| 226437665 | Ndufa11       | NADH dehydrogenase (ubiquinone) 1 alpha subcomplex 11                 | 2  | 0  | 2  |
| 9506911   | Ndufa1        | NADH dehydrogenase (ubiquinone) 1 alpha subcomplex, 1                 | 0  | 0  | 1  |
| 12963633  | Ndufa13       | NADH dehydrogenase (ubiquinone) 1 alpha subcomplex, 13                | 3  | 0  | 4  |
| 31981600  | Ndufa2        | NADH dehydrogenase (ubiquinone) 1 alpha subcomplex, 2                 | 4  | 0  | 1  |
| 33563266  | Ndufa4        | NADH dehydrogenase (ubiquinone) 1 alpha subcomplex, 4                 | 4  | 2  | 4  |
| 13386100  | Ndufa5        | NADH dehydrogenase (ubiquinone) 1 alpha subcomplex, 5                 | 5  | 2  | 3  |
| 13385492  | Ndufa6        | NADH dehydrogenase (ubiquinone) 1 alpha subcomplex, 6 (B14)           | 3  | 0  | 2  |
| 12963571  | Ndufa7        | NADH dehydrogenase (ubiquinone) 1 alpha subcomplex, 7 (B14.5a)        | 4  | 0  | 3  |
| 21312012  | Ndufa8        | NADH dehydrogenase (ubiquinone) 1 alpha subcomplex, 8                 | 4  | 6  | 7  |
| 254692859 | Ndufa9        | NADH dehydrogenase (ubiquinone) 1 alpha subcomplex, 9                 | 12 | 1  | 16 |
| 188035926 | Ndufaf2       | NADH dehydrogenase (ubiquinone) 1 alpha subcomplex, assembly factor 2 | 1  | 0  | 0  |
| 13385054  | Ndufb3        | NADH dehydrogenase (ubiquinone) 1 beta subcomplex 3                   | 1  | 0  | 1  |
| 13385558  | Ndufb8        | NADH dehydrogenase (ubiquinone) 1 beta subcomplex 8                   | 2  | 0  | 3  |
| 58037109  | Ndufb10       | NADH dehydrogenase (ubiquinone) 1 beta subcomplex, 10                 | 5  | 4  | 9  |

|           |               |                                                                |    |    |    |
|-----------|---------------|----------------------------------------------------------------|----|----|----|
| 27754144  | Ndufb5        | NADH dehydrogenase (ubiquinone) 1 beta subcomplex, 5           | 2  | 1  | 3  |
| 84781779  | Ndufb6        | NADH dehydrogenase (ubiquinone) 1 beta subcomplex, 6           | 2  | 1  | 2  |
| 13385322  | Ndufb7        | NADH dehydrogenase (ubiquinone) 1 beta subcomplex, 7           | 4  | 0  | 4  |
| 29789148  | Ndufb9        | NADH dehydrogenase (ubiquinone) 1 beta subcomplex, 9           | 2  | 0  | 8  |
| 27754007  | Ndufab1       | NADH dehydrogenase (ubiquinone) 1, alpha/beta subcomplex, 1    | 6  | 0  | 4  |
| 18859597  | Ndufc2        | NADH dehydrogenase (ubiquinone) 1, subcomplex unknown, 2       | 7  | 0  | 3  |
| 229892322 | Ndufs1        | NADH dehydrogenase (ubiquinone) Fe-S protein 1                 | 27 | 3  | 19 |
| 23346461  | Ndufs2        | NADH dehydrogenase (ubiquinone) Fe-S protein 2                 | 15 | 0  | 11 |
| 58037117  | Ndufs3        | NADH dehydrogenase (ubiquinone) Fe-S protein 3                 | 2  | 1  | 9  |
| 281485615 | Ndufs4        | NADH dehydrogenase (ubiquinone) Fe-S protein 4                 | 3  | 0  | 3  |
| 72004262  | Ndufs5        | NADH dehydrogenase (ubiquinone) Fe-S protein 5                 | 2  | 0  | 1  |
| 56711244  | Ndufs6        | NADH dehydrogenase (ubiquinone) Fe-S protein 6                 | 2  | 0  | 3  |
| 21312950  | Ndufs7        | NADH dehydrogenase (ubiquinone) Fe-S protein 7                 | 3  | 2  | 6  |
| 21314826  | Ndufb4        | NADH dehydrogenase 1 beta subcomplex 4                         | 4  | 1  | 4  |
| 34538598  | ND1           | NADH dehydrogenase subunit 1                                   | 1  | 0  | 3  |
| 34538599  | ND2           | NADH dehydrogenase subunit 2                                   | 0  | 0  | 1  |
| 34538605  | ND3           | NADH dehydrogenase subunit 3                                   | 1  | 0  | 1  |
| 34538607  | ND4           | NADH dehydrogenase subunit 4                                   | 1  | 0  | 3  |
| 34538608  | ND5           | NADH dehydrogenase subunit 5                                   | 1  | 0  | 2  |
| 46195430  | Ndufs8        | NADH dehydrogenase ubiquinone Fe-S 8                           | 3  | 1  | 6  |
| 19526814  | Ndufv1        | NADH dehydrogenase ubiquinone flavoprotein 1 precursor         | 9  | 0  | 12 |
| 110625954 | Ndufv2        | NADH dehydrogenase ubiquinone flavoprotein 2 precursor         | 6  | 0  | 7  |
| 21539587  | Ndufa3        | NADH-ubiquinone oxidoreductase B9 subunit                      | 1  | 0  | 2  |
| 140972309 | Ndufv3        | NADH-ubiquinone oxidoreductase flavoprotein 3 isoform 1        | 8  | 0  | 10 |
| 26251303  | Nox1          | NADPH oxidase 1                                                | 0  | 0  | 2  |
| 6680552   | Napsa         | napsin A aspartic peptidase                                    | 1  | 0  | 0  |
| 294997249 | Nelf          | nasal embryonic LHRH factor isoform B                          | 0  | 1  | 0  |
| 163965357 | Naca          | nascent polypeptide-associated complex alpha subunit isoform a | 5  | 3  | 0  |
| 254675124 | Ccdc19        | nasopharyngeal epithelium specific protein 1 isoform 1         | 0  | 0  | 2  |
| 62526130  | Nktr          | natural killer tumor recognition                               | 1  | 0  | 0  |
| 23943795  | Nckap1l       | NCK associated protein 1 like                                  | 0  | 1  | 0  |
| 49258190  | Nckipsd       | NCK interacting protein with SH3 domain                        | 1  | 0  | 0  |
| 28395023  | Nckap1        | NCK-associated protein 1                                       | 0  | 14 | 2  |
| 21311871  | Nebi          | nebulette                                                      | 1  | 0  | 0  |
| 148222065 | Neb           | nebulin                                                        | 0  | 0  | 1  |
| 164519082 | N4bp2l1       | NEDD4 binding protein 2-like 1                                 | 0  | 0  | 1  |
| 31981859  | C330016O10Rik | Nedd4 binding protein 3                                        | 0  | 0  | 1  |
| 21450341  | Nae1          | NEDD8 activating enzyme E1 subunit 1                           | 2  | 0  | 0  |
| 119360354 | Nub1          | Nedd8 ultimate buster-1                                        | 4  | 0  | 0  |
| 118130803 | Neil2         | nei like 2                                                     | 1  | 0  | 0  |
| 159131891 | Nphp3         | nephrocystin 3 isoform a                                       | 1  | 0  | 0  |
| 124244073 | Nphp4         | nephrocystin 4                                                 | 1  | 0  | 0  |
| 111607453 | 4831426I19Rik | nesprin-3 isoform beta                                         | 0  | 0  | 8  |

|           |               |                                                                                       |    |    |   |
|-----------|---------------|---------------------------------------------------------------------------------------|----|----|---|
| 13385392  | Napa          | N-ethylmaleimide sensitive fusion protein attachment protein alpha                    | 8  | 0  | 1 |
| 29789104  | Napb          | N-ethylmaleimide sensitive fusion protein attachment protein beta                     | 2  | 0  | 0 |
| 23346571  | Unc5a         | netrin receptor Unc5h1                                                                | 1  | 0  | 0 |
| 56699423  | Nedd4         | neural precursor cell expressed, developmentally down-regulated gene 4                | 4  | 0  | 1 |
| 167466245 | Nedd4l        | neural precursor cell expressed, developmentally down-regulated gene 4-like isoform 1 | 2  | 0  | 0 |
| 6679034   | Nedd8         | neural precursor cell expressed, developmentally down-regulated gene 8                | 2  | 0  | 0 |
| 31982836  | Npc1          | neural proliferation, differentiation and control gene 1                              | 1  | 0  | 0 |
| 158854037 | Nbea          | neurobeachin                                                                          | 0  | 1  | 0 |
| 111154109 | Nras          | neuroblastoma ras oncogene                                                            | 6  | 5  | 3 |
| 237858634 | Nfasc         | neurofascin isoform 1 precursor                                                       | 0  | 1  | 0 |
| 31982775  | Nf2           | neurofibromatosis 2                                                                   | 0  | 1  | 0 |
| 34878892  | Nf1           | neurofibromin                                                                         | 2  | 0  | 1 |
| 39204499  | Nefl          | neurofilament, light polypeptide                                                      | 1  | 0  | 0 |
| 6671587   | Neurod4       | neurogenic differentiation 4                                                          | 0  | 0  | 1 |
| 58037133  | Ngdn          | neuroguidin, EIF4E binding protein                                                    | 0  | 0  | 2 |
| 56699425  | Nlgn2         | neuroligin 2                                                                          | 1  | 0  | 0 |
| 28077051  | Nln           | neurolysin                                                                            | 1  | 0  | 0 |
| 167466226 | Nav2          | neuron navigator 2 isoform 1                                                          | 1  | 0  | 0 |
| 124486648 | Nav3          | neuron navigator 3                                                                    | 0  | 0  | 1 |
| 162417959 | Ngef          | neuronal guanine nucleotide exchange factor isoform 1                                 | 0  | 1  | 0 |
| 158631246 | Ndufb11       | neuronal protein 15.6                                                                 | 2  | 0  | 2 |
| 256017197 | Nova1         | neuro-oncological ventral antigen 1 isoform 1                                         | 0  | 1  | 0 |
| 326633237 | Npy2r         | neuropeptide Y receptor Y2                                                            | 1  | 0  | 0 |
| 251823964 | Neto1         | neuropilin- and tolloid-like protein 1                                                | 1  | 0  | 0 |
| 153945724 | Nptn          | neuroplastin                                                                          | 1  | 0  | 0 |
| 13277358  | Nts           | neurotensin                                                                           | 0  | 0  | 1 |
| 9055296   | Ntsr1         | neurotensin receptor 1                                                                | 0  | 0  | 1 |
| 6679891   | Ganab         | neutral alpha-glucosidase AB                                                          | 47 | 1  | 1 |
| 240849436 | Nexn          | nexilin                                                                               | 0  | 1  | 1 |
| 255069776 | 2310057J16Rik | Nezha isoform 2                                                                       | 0  | 1  | 0 |
| 187608797 | Nfkbil2       | NF-kappa-B inhibitor-like protein 2                                                   | 0  | 1  | 0 |
| 21312616  | Nkiras2       | NFKB inhibitor interacting Ras-like protein 2                                         | 0  | 3  | 0 |
| 58082069  | Ppp1r13l      | NFKB interacting protein 1                                                            | 1  | 0  | 0 |
| 61888900  | Thoc7         | Ngg1 interacting factor 3 like 1 binding protein 1 isoform 1                          | 0  | 7  | 0 |
| 41056093  | Nif3l1        | Ngg1 interacting factor 3-like 1                                                      | 1  | 0  | 0 |
| 27369692  | Nhlrc3        | NHL repeat containing 3                                                               | 4  | 0  | 0 |
| 84781725  | Nhp2l1        | NHP2 non-histone chromosome protein 2-like 1                                          | 2  | 13 | 9 |
| 13386120  | Nhp2          | NHP2 ribonucleoprotein homolog                                                        | 0  | 8  | 4 |
| 145386524 | Nbn           | nibrin                                                                                | 0  | 1  | 0 |
| 33469043  | Ncln          | nicalin homolog                                                                       | 4  | 0  | 1 |
| 224809376 | Ncstn         | nicastrin                                                                             | 6  | 0  | 0 |
| 260166706 | Ubp2l         | Nice-4 protein homolog isoform 2                                                      | 7  | 0  | 0 |
| 257153454 | Nampt         | nicotinamide phosphoribosyltransferase                                                | 12 | 0  | 0 |
| 225543267 | Nrk           | Nik related kinase                                                                    | 0  | 1  | 1 |
| 124107627 | Nek1          | NIMA-related kinase 1                                                                 | 0  | 1  | 0 |
| 304766813 | Nek10         | NIMA-related kinase 10                                                                | 0  | 1  | 0 |
| 31559852  | Nek5          | NIMA-related kinase 5                                                                 | 0  | 1  | 1 |
| 125346156 | Nin           | ninein isoform 1                                                                      | 0  | 1  | 0 |
| 13385084  | Nipsnap3a     | nipsnap homolog 3B                                                                    | 1  | 0  | 0 |

|           |               |                                                                                               |    |    |    |
|-----------|---------------|-----------------------------------------------------------------------------------------------|----|----|----|
| 114158672 | Nisch         | nischarin                                                                                     | 1  | 0  | 0  |
| 12963555  | Nit2          | Nit protein 2                                                                                 | 3  | 0  | 0  |
| 254826728 | Nosip         | nitric oxide synthase interacting protein isoform 1                                           | 0  | 3  | 0  |
| 6754856   | Nit1          | nitrilase 1                                                                                   | 1  | 0  | 0  |
| 161016824 | Nfs1          | nitrogen fixation gene, yeast homolog 1                                                       | 7  | 0  | 0  |
| 161016805 | Nkx3-2        | NK3 homeobox 2                                                                                | 1  | 0  | 0  |
| 255522935 | Nlr1          | NLR family member X1                                                                          | 0  | 0  | 1  |
| 309268636 | Nlrp4d        | NLR family, pyrin domain containing 4D                                                        | 1  | 0  | 0  |
| 213688428 | Nmi           | N-mcy (and STAT) interactor                                                                   | 2  | 0  | 0  |
| 21313242  | Narg1l        | NMDA receptor regulated 1-like                                                                | 1  | 0  | 0  |
| 225543482 | Narg1         | NMDA receptor-regulated gene 1                                                                | 3  | 1  | 0  |
| 34594671  | Narg2         | NMDA receptor-regulated gene 2                                                                | 0  | 1  | 0  |
| 24431937  | Nmral1        | NmrA-like family domain containing 1                                                          | 1  | 0  | 0  |
| 118150658 | Ndr1          | N-myc downstream regulated 1                                                                  | 7  | 0  | 0  |
| 255918147 | Ndr3          | N-myc downstream regulated gene 3                                                             | 0  | 1  | 0  |
| 6679082   | Nmt1          | N-myristoyltransferase 1                                                                      | 2  | 5  | 0  |
| 6679084   | Nmt2          | N-myristoyltransferase 2                                                                      | 1  | 3  | 0  |
| 227908803 | Nomo1         | nodal modulator 1                                                                             | 22 | 0  | 0  |
| 295054316 | Nsun2         | NOL1/NOP2/Sun domain family, member 2                                                         | 1  | 4  | 0  |
| 21312358  | Nsun4         | NOL1/NOP2/Sun domain family, member 4                                                         | 0  | 0  | 1  |
| 46519166  | Nsun7         | NOL1/NOP2/Sun domain family, member 7                                                         | 0  | 0  | 1  |
| 255958247 | Nono          | non-POU-domain-containing, octamer binding protein                                            | 2  | 23 | 7  |
| 22165392  | Ncapd2        | non-SMC condensin I complex, subunit D2                                                       | 0  | 2  | 2  |
| 169234780 | Ncapg         | non-SMC condensin I complex, subunit G                                                        | 0  | 1  | 0  |
| 161016797 | Ncapd3        | non-SMC condensin II complex, subunit D3                                                      | 0  | 4  | 1  |
| 34328291  | Nsmce1        | non-SMC element 1 homolog                                                                     | 0  | 1  | 2  |
| 257196205 | Nsmce2        | non-SMC element 2, MMS21 homolog                                                              | 0  | 1  | 1  |
| 242246981 | Nsmce4a       | non-SMC element 4 homolog A isoform 5                                                         | 0  | 5  | 4  |
| 13384790  | Nop10         | NOP10 ribonucleoprotein homolog                                                               | 0  | 4  | 0  |
| 30519925  | Nop16         | NOP16 nucleolar protein homolog                                                               | 0  | 0  | 4  |
| 31560052  | Trp53rk       | Nori-2 protein                                                                                | 1  | 0  | 0  |
| 224967065 | Notch1        | Notch 1                                                                                       | 1  | 0  | 0  |
| 157412261 | 4930579E17Rik | notch1-induced protein                                                                        | 0  | 0  | 1  |
| 117676367 | Rrp1          | novel nuclear protein 1                                                                       | 0  | 0  | 2  |
| 213512857 | Nsl1          | NSL1, MIND kinetochore complex component                                                      | 0  | 0  | 1  |
| 158749551 | Nxt1          | NTF2-related export protein 1                                                                 | 0  | 1  | 0  |
| 227908769 | Nthl1         | nth endonuclease III-like 1                                                                   | 0  | 3  | 0  |
| 125490378 | Nasp          | nuclear autoantigenic sperm protein isoform 1                                                 | 15 | 0  | 0  |
| 144922627 | AU014645      | nuclear cap binding protein subunit 1, 80kDa                                                  | 0  | 13 | 10 |
| 13386056  | Ncbp2         | nuclear cap binding protein subunit 2                                                         | 1  | 3  | 2  |
| 6754910   | Nudc          | nuclear distribution gene C homolog                                                           | 3  | 0  | 0  |
| 166197654 | Nde1          | nuclear distribution gene E homolog 1 isoform a                                               | 0  | 1  | 0  |
| 194440738 | Nfe2l1        | nuclear factor erythroid 2-like 1 isoform 1                                                   | 1  | 1  | 0  |
| 163965422 | Nfib          | nuclear factor I/B isoform 3                                                                  | 0  | 4  | 0  |
| 126517474 | Nfix          | nuclear factor I/X isoform 3                                                                  | 1  | 1  | 0  |
| 117606364 | Nfkb1         | nuclear factor kappa-B, subunit 1                                                             | 1  | 1  | 1  |
| 254588131 | Nfatc2ip      | nuclear factor of activated T-cells, cytoplasmic, calcineurin-dependent 2 interacting protein | 0  | 0  | 1  |
| 270047510 | Nfatc4        | nuclear factor of activated T-cells, cytoplasmic, calcineurin-dependent 4                     | 0  | 1  | 0  |
| 293651548 | Nfkb2         | nuclear factor of kappa light polypeptide gene enhancer in B-cells 2, p49/p100                | 2  | 0  | 0  |
| 226874843 | Nfkbiz        | nuclear factor of kappa light polypeptide gene enhancer in B-cells inhibitor, zeta isoform a  | 0  | 1  | 0  |

|           |        |                                                           |    |    |    |
|-----------|--------|-----------------------------------------------------------|----|----|----|
| 40254249  | Nfrkb  | nuclear factor related to kappaB binding protein          | 0  | 1  | 0  |
| 19527358  | Prpf19 | nuclear matrix protein SNEV                               | 6  | 18 | 15 |
| 254675300 | Numa1  | nuclear mitotic apparatus protein 1                       | 8  | 78 | 38 |
| 270309140 | Tpr    | nuclear pore complex-associated protein Tpr               | 4  | 74 | 10 |
| 156231054 | Pom121 | nuclear pore membrane protein 121                         | 0  | 0  | 5  |
| 254911120 | Narfl  | nuclear prelamin A recognition factor-like                | 1  | 0  | 0  |
| 303324586 | Nploc4 | nuclear protein localization 4                            | 1  | 2  | 0  |
| 22219434  | Nrbp1  | nuclear receptor binding protein                          | 1  | 0  | 0  |
| 118026944 | Ncoa2  | nuclear receptor coactivator 2 isoform a                  | 0  | 0  | 1  |
| 21450271  | Ncoa5  | nuclear receptor coactivator 5                            | 0  | 0  | 4  |
| 145587671 | Ncoa6  | nuclear receptor coactivator 6                            | 0  | 1  | 0  |
| 119226235 | Ncor2  | nuclear receptor co-repressor 2                           | 0  | 1  | 0  |
| 27734110  | Nrip1  | nuclear receptor interacting protein 1                    | 1  | 0  | 0  |
| 6671531   | Nr0b1  | nuclear receptor subfamily 0, group B, member 1           | 0  | 1  | 0  |
| 170650696 | Nr1h5  | nuclear receptor subfamily 1, group H, member 5 isoform 2 | 0  | 1  | 0  |
| 73611910  | Nr2f2  | nuclear receptor subfamily 2, group F, member 2 isoform 1 | 0  | 4  | 0  |
| 112807199 | Nr2f6  | nuclear receptor subfamily 2, group F, member 6           | 0  | 1  | 0  |
| 6754216   | Nr4a1  | nuclear receptor subfamily 4, group A, member 1           | 0  | 0  | 1  |
| 7657397   | Nr4a3  | nuclear receptor subfamily 4, group A, member 3           | 0  | 1  | 0  |
| 229335598 | Nr5a2  | nuclear receptor subfamily 5, group A, member 2 isoform 1 | 1  | 0  | 0  |
| 255982555 | Nrf1   | nuclear respiratory factor 1                              | 0  | 3  | 0  |
| 31980798  | Nxf1   | nuclear RNA export factor 1                               | 1  | 17 | 5  |
| 12963545  | Znrd1  | nuclear RNA polymerase I small specific subunit           | 0  | 1  | 0  |
| 161016831 | Nfya   | nuclear transcription factor Y, alpha isoform b           | 0  | 1  | 0  |
| 6754850   | Nfyb   | nuclear transcription factor-Y beta                       | 0  | 3  | 0  |
| 114326538 | Nfyc   | nuclear transcription factor-Y gamma                      | 0  | 4  | 0  |
| 13386032  | Nutf2  | nuclear transport factor 2                                | 2  | 0  | 0  |
| 33468981  | Nvl    | nuclear VCP-like                                          | 0  | 1  | 2  |
| 113205059 | Ybx1   | nuclease sensitive element binding protein 1              | 10 | 6  | 9  |
| 254750698 | Nucb1  | nucleobindin 1 isoform 2                                  | 12 | 0  | 0  |
| 194440700 | Nucb2  | nucleobindin 2 isoform 2                                  | 6  | 0  | 0  |
| 86198333  | Nolc1  | nucleolar and coiled-body phosphoprotein 1 isoform C      | 1  | 8  | 2  |
| 124301227 | Noc2l  | nucleolar complex associated 2 homolog                    | 0  | 3  | 8  |
| 188497644 | Noc3l  | nucleolar complex associated 3 homolog                    | 0  | 0  | 3  |
| 31981994  | Noc4l  | nucleolar complex associated 4 homolog                    | 0  | 2  | 2  |
| 158966689 | Nop2   | nucleolar protein 1                                       | 0  | 9  | 9  |
| 56606027  | Nol10  | nucleolar protein 10                                      | 0  | 0  | 2  |
| 238550124 | Nol11  | nucleolar protein 11 isoform 1                            | 0  | 0  | 9  |
| 120407050 | Nop58  | nucleolar protein 5                                       | 7  | 24 | 17 |
| 126090932 | Nop56  | nucleolar protein 5A                                      | 6  | 33 | 30 |
| 117647257 | Nol7   | nucleolar protein 7                                       | 0  | 0  | 1  |
| 124486813 | Nol8   | nucleolar protein 8                                       | 1  | 0  | 0  |
| 118026904 | Nol6   | nucleolar protein family 6                                | 0  | 16 | 3  |
| 13384710  | Gar1   | nucleolar protein family A, member 1                      | 0  | 6  | 5  |
| 21312650  | Ddx56  | nucleolar RNA helicase homolog                            | 0  | 0  | 2  |
| 84875537  | Ncl    | nucleolin                                                 | 24 | 21 | 13 |
| 6679108   | Npm1   | nucleophosmin 1                                           | 3  | 13 | 4  |
| 6679110   | Npm3   | nucleoplasmin 3                                           | 1  | 3  | 0  |
| 29789351  | Nup107 | nucleoporin 107                                           | 0  | 16 | 12 |
| 283806543 | Nup133 | nucleoporin 133                                           | 0  | 27 | 22 |
| 254588102 | Nup153 | nucleoporin 153                                           | 2  | 0  | 6  |

|           |         |                                                              |   |    |    |
|-----------|---------|--------------------------------------------------------------|---|----|----|
| 165932389 | Nup155  | nucleoporin 155                                              | 1 | 29 | 21 |
| 10946932  | Nup160  | nucleoporin 160                                              | 0 | 34 | 12 |
| 38678526  | Nup188  | nucleoporin 188                                              | 0 | 15 | 12 |
| 226437676 | Nup205  | nucleoporin 205                                              | 1 | 48 | 32 |
| 172073152 | Nup210  | nucleoporin 210                                              | 0 | 11 | 44 |
| 124378033 | Nup214  | nucleoporin 214                                              | 0 | 4  | 0  |
| 298231198 | Nup35   | nucleoporin 35                                               | 0 | 2  | 5  |
| 210032861 | Nup37   | nucleoporin 37                                               | 0 | 10 | 5  |
| 38016154  | Nup50   | nucleoporin 50                                               | 0 | 6  | 5  |
| 39930543  | Nup54   | nucleoporin 54                                               | 0 | 15 | 6  |
| 16716349  | Nup62   | nucleoporin 62                                               | 1 | 10 | 2  |
| 108773813 | Nup85   | nucleoporin 85                                               | 0 | 15 | 6  |
| 134053894 | Nup88   | nucleoporin 88 isoform 1                                     | 0 | 11 | 4  |
| 27369533  | Nup93   | nucleoporin 93                                               | 1 | 27 | 20 |
| 39930413  | Nup98   | nucleoporin 98                                               | 0 | 2  | 12 |
| 24497431  | Nupl1   | nucleoporin like 1                                           | 0 | 8  | 1  |
| 166295220 | Nup43   | nucleoporin Nup43                                            | 0 | 3  | 1  |
| 255308888 | Nme3    | nucleoside diphosphate kinase 3                              | 1 | 0  | 3  |
| 117606270 | Nme2    | nucleoside diphosphate kinase B                              | 2 | 3  | 4  |
| 9055290   | Nme6    | nucleoside diphosphate kinase type 6                         | 0 | 1  | 0  |
| 37700232  | Nme1    | nucleoside-diphosphate kinase 1                              | 9 | 4  | 6  |
| 226443026 | Nap1l1  | nucleosome assembly protein 1-like 1 isoform 2               | 5 | 0  | 1  |
| 6679012   | Nap1l4  | nucleosome assembly protein 1-like 4                         | 3 | 1  | 0  |
| 133778915 | Nsbp1   | nucleosome binding protein 1                                 | 1 | 13 | 1  |
| 167234411 | Nubpl   | nucleotide binding protein-like                              | 2 | 0  | 0  |
| 133922575 | Nudcd2  | NudC domain containing 2                                     | 0 | 1  | 0  |
| 84871976  | Nudt18  | nudix (nucleoside diphosphate linked moiety X)-type motif 18 | 0 | 0  | 1  |
| 13386106  | Nudt21  | nudix (nucleoside diphosphate linked moiety X)-type motif 21 | 4 | 13 | 3  |
| 125656157 | Nudt16  | nudix-type motif 16                                          | 0 | 1  | 0  |
| 86198335  | Nudt2   | nudix-type motif 2                                           | 0 | 0  | 1  |
| 8393853   | Nudt5   | nudix-type motif 5                                           | 4 | 0  | 1  |
| 13384950  | Nudt8   | nudix-type motif 8                                           | 1 | 2  | 0  |
| 110625714 | Nuf2    | NUF2R protein                                                | 1 | 0  | 0  |
| 209862959 | Numb    | numb gene homolog isoform 1                                  | 1 | 1  | 0  |
| 19527352  | Nrm     | nurim                                                        | 0 | 3  | 6  |
| 28077041  | Spata16 | Nyd-sp12 protein isoform 1                                   | 0 | 1  | 0  |
| 21313144  | Ola1    | Obg-like ATPase 1 isoform a                                  | 7 | 2  | 1  |
| 256574803 | Ocel1   | occludin/ELL domain containing 1                             | 0 | 0  | 1  |
| 229577356 | Ociad1  | OClA domain containing 1 isoform 1                           | 8 | 0  | 4  |
| 124248484 | Odz4    | odd Oz/ten-m homolog 4                                       | 0 | 1  | 2  |
| 283135128 | Olf1507 | odorant receptor MOR28                                       | 0 | 1  | 0  |
| 84370359  | Olfm1   | olfactomedin 1 isoform a                                     | 0 | 0  | 1  |
| 86439989  | Olfml3  | olfactomedin-like 3                                          | 1 | 0  | 0  |
| 22129493  | Olf1033 | olfactory receptor 1033                                      | 0 | 1  | 0  |
| 289577138 | Olf1052 | olfactory receptor 1052                                      | 0 | 0  | 1  |
| 22129711  | Olf113  | olfactory receptor 113                                       | 1 | 0  | 0  |
| 33238990  | Olf1317 | olfactory receptor 1317                                      | 1 | 0  | 0  |
| 22129197  | Olf133  | olfactory receptor 133                                       | 1 | 0  | 0  |
| 53828663  | Olf138  | olfactory receptor 138                                       | 0 | 1  | 0  |
| 22129733  | Olf1402 | olfactory receptor 1402                                      | 0 | 0  | 1  |
| 33238892  | Olf165  | olfactory receptor 165                                       | 0 | 1  | 0  |
| 46430560  | Olf1257 | olfactory receptor 257                                       | 0 | 0  | 1  |

|           |         |                                                            |    |   |   |
|-----------|---------|------------------------------------------------------------|----|---|---|
| 268607654 | Olfr290 | olfactory receptor 290                                     | 0  | 0 | 1 |
| 22129699  | Olfr446 | olfactory receptor 446                                     | 1  | 0 | 0 |
| 33239114  | Olfr474 | olfactory receptor 474                                     | 0  | 0 | 1 |
| 22129371  | Olfr483 | olfactory receptor 483                                     | 0  | 0 | 1 |
| 121247462 | Olfr554 | olfactory receptor 554                                     | 0  | 0 | 1 |
| 22128741  | Olfr559 | olfactory receptor 559                                     | 0  | 1 | 0 |
| 22128737  | Olfr570 | olfactory receptor 570                                     | 1  | 0 | 0 |
| 22128747  | Olfr578 | olfactory receptor 578                                     | 1  | 0 | 0 |
| 58801352  | Olfr598 | olfactory receptor 598                                     | 1  | 0 | 1 |
| 22129381  | Olfr599 | olfactory receptor 599                                     | 1  | 0 | 0 |
| 112982848 | Olfr747 | olfactory receptor 747                                     | 0  | 1 | 1 |
| 33239278  | Olfr860 | olfactory receptor 860                                     | 0  | 0 | 1 |
| 22129519  | Olfr868 | olfactory receptor 868                                     | 1  | 1 | 1 |
| 22129285  | Olfr916 | olfactory receptor 916                                     | 0  | 1 | 0 |
| 22129203  | Olfr983 | olfactory receptor 983                                     | 1  | 0 | 0 |
| 58801340  | Olfr987 | olfactory receptor 987                                     | 1  | 0 | 0 |
| 126723205 | Obfc2a  | oligonucleotide/oligosaccharide-binding fold containing 2A | 0  | 2 | 0 |
| 28076937  | Obfc2b  | oligonucleotide/oligosaccharide-binding fold containing 2B | 0  | 3 | 0 |
| 46909607  | Ogt     | O-linked N-acetylglucosamine transferase                   | 0  | 2 | 0 |
| 22164770  | Oit1    | oncoprotein induced transcript 1                           | 1  | 0 | 0 |
| 312836758 | Opa1    | optic atrophy 1 homolog                                    | 3  | 0 | 0 |
| 42821120  | Hcrtr2  | orexin receptor 2                                          | 0  | 1 | 0 |
| 124286818 | Orc4l   | origin recognition complex subunit 4                       | 0  | 1 | 0 |
| 255069721 | Orc6l   | origin recognition complex subunit 6-like isoform a        | 0  | 0 | 1 |
| 70909306  | Orc2l   | origin recognition complex, subunit 2-like isoform B       | 0  | 3 | 1 |
| 227116263 | Orc3l   | origin recognition complex, subunit 3-like isoform 1       | 0  | 1 | 1 |
| 13385128  | Ormdl3  | ORM1-like 3                                                | 1  | 0 | 0 |
| 6679184   | Otc     | ornithine transcarbamylase                                 | 1  | 0 | 0 |
| 84662768  | Osgep   | O-sialoglycoprotein endopeptidase                          | 1  | 0 | 0 |
| 22267440  | Ostf1   | osteoclast stimulating factor 1                            | 3  | 0 | 0 |
| 283837911 | Os9     | osteosarcoma amplified 9                                   | 4  | 0 | 0 |
| 190358487 | Otog    | otogelin                                                   | 0  | 1 | 1 |
| 153791407 | Otop3   | otopetrin 3                                                | 0  | 1 | 0 |
| 19527388  | Otub1   | otubain 1                                                  | 9  | 0 | 5 |
| 295054201 | Odf2    | outer dense fiber of sperm tails 2 isoform a               | 0  | 0 | 1 |
| 124301201 | Nfxl1   | ovarian zinc finger protein                                | 1  | 0 | 1 |
| 33468849  | Ovgp1   | oviductal glycoprotein 1                                   | 0  | 0 | 1 |
| 9910472   | Ovol1   | OVO homolog-like 1                                         | 0  | 2 | 1 |
| 194328708 | Oxr1    | oxidation resistance 1 isoform A                           | 2  | 0 | 0 |
| 110626165 | Oxsr1   | oxidative-stress responsive 1                              | 1  | 0 | 0 |
| 85861164  | Ogdh    | oxoglutarate dehydrogenase (lipoamide)                     | 38 | 1 | 3 |
| 52345396  | Osbpl1a | oxysterol binding protein-like 1                           | 1  | 0 | 0 |
| 257196261 | Osbpl11 | oxysterol binding protein-like 11                          | 0  | 0 | 1 |
| 68131560  | Osbpl6  | oxysterol binding protein-like 6                           | 0  | 0 | 1 |
| 198278439 | Osbpl9  | oxysterol binding protein-like 9 isoform a                 | 0  | 0 | 2 |
| 124487451 | Osbpl7  | oxysterol-binding protein-like protein 7                   | 1  | 0 | 0 |
| 112181194 | Pak1    | p21-activated kinase 1                                     | 1  | 0 | 0 |
| 46559406  | Pak2    | p21-activated kinase 2                                     | 7  | 0 | 0 |
| 304307788 | Pak3    | p21-activated kinase 3                                     | 2  | 0 | 0 |
| 29336032  | Pak4    | p21-activated kinase 4                                     | 0  | 2 | 0 |
| 224994209 | Pak6    | p21-activated kinase 6                                     | 0  | 0 | 1 |



|           |               |                                                                      |   |    |    |
|-----------|---------------|----------------------------------------------------------------------|---|----|----|
| 226958577 | 2610301G19Rik | p30 DBC protein                                                      | 7 | 37 | 10 |
| 38198665  | Nsfl1c        | p47 protein                                                          | 6 | 0  | 0  |
| 164519134 | Gatad2a       | p66 alpha isoform b                                                  | 0 | 7  | 4  |
| 62243808  | Dopey2        | pad-1-like isoform 1                                                 | 1 | 0  | 1  |
| 31980912  | Paf1          | Paf1, RNA polymerase II associated factor, homolog                   | 0 | 7  | 0  |
| 326537335 | Pax2          | paired box gene 2                                                    | 0 | 5  | 0  |
| 7305369   | Pax6          | paired box gene 6                                                    | 1 | 0  | 0  |
| 6754990   | Pax8          | paired box gene 8                                                    | 0 | 4  | 0  |
| 6679341   | Pitx3         | paired-like homeodomain transcription factor 3                       | 1 | 0  | 0  |
| 145046259 | Pak1ip1       | PAK/PLC-interacting protein 1                                        | 1 | 14 | 1  |
| 165377089 | Arhgef7       | PAK-interacting exchange factor beta isoform c                       | 3 | 0  | 1  |
| 171846274 | X99384        | paladin                                                              | 1 | 0  | 0  |
| 9790039   | Pldn          | pallidin                                                             | 1 | 0  | 0  |
| 121674797 | Ppt1          | palmitoyl-protein thioesterase 1                                     | 6 | 0  | 0  |
| 14010845  | 9530002B09Rik | palmitoyl-protein thioesterase-like protein                          | 0 | 0  | 1  |
| 127141012 | Mycbp2        | pam, highwire, rpm 1                                                 | 1 | 0  | 1  |
| 6754980   | Reg3b         | pancreatitis-associated protein                                      | 0 | 1  | 0  |
| 226958374 | Sypl          | pantophysin isoform 2                                                | 3 | 0  | 0  |
| 22122397  | Pank3         | pantothenate kinase 3                                                | 0 | 0  | 1  |
| 15809012  | Prcc          | papillary renal cell carcinoma translocation-associated gene product | 0 | 4  | 0  |
| 163310767 | Pard3b        | par-3 partitioning defective 3 homolog B                             | 0 | 2  | 1  |
| 167004227 | Coq2          | para-hydroxybenzoate-polyprenyltransferase, mitochondrial            | 0 | 1  | 1  |
| 124430707 | 4432412L15Rik | paralemmin 3                                                         | 1 | 0  | 0  |
| 34303979  | Pon2          | paraoxonase 2                                                        | 5 | 0  | 0  |
| 27370510  | Pon3          | paraoxonase 3                                                        | 2 | 0  | 0  |
| 225543409 | Pspc1         | paraspeckle protein 1                                                | 1 | 13 | 4  |
| 157841170 | Pddc1         | Parkinson disease 7 domain containing 1                              | 1 | 5  | 0  |
| 55741460  | Park7         | Parkinson disease protein 7                                          | 6 | 0  | 0  |
| 171184415 | Pard3         | partitioning-defective protein 3 homolog isoform 1                   | 0 | 0  | 1  |
| 124486979 | Palb2         | partner and localizer of BRCA2                                       | 0 | 1  | 0  |
| 13384846  | Pno1          | partner of NOB1                                                      | 0 | 5  | 3  |
| 31982526  | Parva         | parvin, alpha                                                        | 1 | 1  | 0  |
| 18860551  | Parvb         | parvin, beta                                                         | 0 | 1  | 0  |
| 170763472 | Pnpla6        | patatin-like phospholipase domain containing 6                       | 1 | 0  | 0  |
| 118130807 | Pnpla8        | patatin-like phospholipase domain containing 8                       | 1 | 0  | 0  |
| 42734451  | Paxip1        | Pax transcription activation domain interacting protein              | 0 | 3  | 0  |
| 34368580  | Pknox1        | Pbx/knotted 1 homeobox                                               | 0 | 2  | 0  |
| 119372296 | Pcid2         | PCI domain containing 2                                              | 0 | 6  | 1  |
| 6679233   | Pctk3         | PCTAIRE protein kinase 3                                             | 0 | 8  | 5  |
| 7242173   | Pctk1         | PCTAIRE-motif protein kinase 1                                       | 1 | 0  | 1  |
| 84781781  | Pdap1         | PDGFA associated protein 1                                           | 0 | 5  | 0  |
| 124486765 | Pds5a         | PDS5, regulator of cohesion maintenance, homolog A                   | 0 | 31 | 4  |
| 66955886  | Pds5b         | PDS5, regulator of cohesion maintenance, homolog B                   | 0 | 51 | 6  |
| 166197681 | Pdlim7        | PDZ and LIM domain 7 isoform b                                       | 0 | 1  | 0  |
| 225579122 | Pdzk1         | PDZ domain containing 1                                              | 1 | 0  | 0  |
| 21312244  | Pdzd11        | PDZ domain containing 11                                             | 0 | 4  | 4  |
| 124486716 | Pdzd2         | PDZ domain containing 2                                              | 0 | 1  | 0  |
| 124053449 | Intu          | PDZ domain containing 6                                              | 0 | 0  | 1  |
| 256985136 | Pdzrn3        | PDZ domain containing RING finger 3                                  | 0 | 1  | 0  |
| 20373163  | Scrib         | PDZ-domain protein scribble                                          | 3 | 2  | 13 |
| 126352572 | Pcxl2         | pecanex-like 2 isoform 2                                             | 1 | 0  | 1  |

|           |           |                                                            |    |    |    |
|-----------|-----------|------------------------------------------------------------|----|----|----|
| 6755022   | Slc26a4   | pendrin                                                    | 1  | 0  | 1  |
| 33469980  | Ptcd3     | pentatricopeptide repeat domain 3                          | 7  | 2  | 0  |
| 27502349  | Pmpca     | peptidase (mitochondrial processing) alpha                 | 12 | 7  | 0  |
| 171906557 | Padi2     | peptidyl arginine deiminase, type II                       | 5  | 0  | 1  |
| 156938255 | Padi3     | peptidyl arginine deiminase, type III                      | 0  | 0  | 1  |
| 156938252 | Padi4     | peptidyl arginine deiminase, type IV                       | 0  | 16 | 0  |
| 153792657 | Pam       | peptidylglycine alpha-amidating monooxygenase              | 1  | 0  | 1  |
| 6679439   | Ppia      | peptidylprolyl isomerase A                                 | 16 | 14 | 11 |
| 71774133  | Ppib      | peptidylprolyl isomerase B                                 | 9  | 13 | 4  |
| 6679441   | Ppic      | peptidylprolyl isomerase C                                 | 0  | 1  | 0  |
| 13385854  | Ppid      | peptidylprolyl isomerase D                                 | 6  | 0  | 0  |
| 255683299 | Ppwd1     | peptidylprolyl isomerase domain and WD repeat containing 1 | 0  | 12 | 0  |
| 14196340  | Ppie      | peptidylprolyl isomerase E                                 | 2  | 4  | 4  |
| 19527310  | Ppif      | peptidylprolyl isomerase F                                 | 2  | 5  | 0  |
| 124487333 | Ppig      | peptidylprolyl isomerase G                                 | 0  | 0  | 1  |
| 158631196 | Ppjh      | peptidylprolyl isomerase H isoform 1                       | 1  | 11 | 2  |
| 21312784  | Ppil1     | peptidylprolyl isomerase-like 1                            | 2  | 2  | 3  |
| 30025020  | Ppil2     | peptidylprolyl isomerase-like 2                            | 1  | 1  | 1  |
| 169790966 | Ppil3     | peptidylprolyl isomerase-like 3 isoform 1                  | 0  | 1  | 0  |
| 165972339 | Ppil4     | peptidylprolyl isomerase-like 4                            | 1  | 2  | 0  |
| 30519902  | Pthr1     | peptidyl-tRNA hydrolase 1 homolog                          | 0  | 1  | 0  |
| 170172589 | Prx       | periaxin isoform L                                         | 1  | 0  | 0  |
| 93004085  | Pcnt      | pericentrin                                                | 1  | 1  | 5  |
| 170763496 | Pcm1      | pericentriolar material 1                                  | 2  | 0  | 1  |
| 284005509 | Pwp1      | periodic tryptophan protein 1 homolog                      | 0  | 1  | 0  |
| 163838662 | Tspo      | peripheral benzodiazepine receptor                         | 0  | 0  | 3  |
| 157909774 | Bzrap1    | peripheral benzodiazepine receptor-associated protein 1    | 0  | 0  | 1  |
| 158749615 | BC016423  | peripheral benzodiazepine receptor associated protein      | 1  | 0  | 1  |
| 133779004 | Pphln1    | periphilin 1 isoform 1                                     | 0  | 1  | 1  |
| 112421039 | Ppl       | periplakin                                                 | 56 | 90 | 92 |
| 183979966 | Hspg2     | perlecan (heparan sulfate proteoglycan 2)                  | 1  | 1  | 2  |
| 268370173 | Pxdn      | peroxidasin                                                | 1  | 1  | 2  |
| 61657895  | Pex1      | peroxin1                                                   | 0  | 1  | 0  |
| 6754976   | Prdx1     | peroxiredoxin 1                                            | 4  | 15 | 8  |
| 148747558 | Prdx2     | peroxiredoxin 2                                            | 7  | 7  | 0  |
| 6680690   | Prdx3     | peroxiredoxin 3                                            | 9  | 1  | 1  |
| 7948999   | Prdx4     | peroxiredoxin 4                                            | 9  | 1  | 1  |
| 6755114   | Prdx5     | peroxiredoxin 5 precursor                                  | 14 | 8  | 6  |
| 28916703  | Prdx6-rs1 | peroxiredoxin 5 related sequence 1 protein                 | 2  | 0  | 0  |
| 6671549   | Prdx6     | peroxiredoxin 6                                            | 7  | 0  | 0  |
| 241666485 | Pex11b    | peroxisomal biogenesis factor 11 beta isoform 1            | 2  | 1  | 2  |
| 21735445  | Pex11c    | peroxisomal biogenesis factor 11 gamma                     | 0  | 0  | 1  |
| 9790153   | Pex14     | peroxisomal biogenesis factor 14                           | 0  | 0  | 1  |
| 254750742 | Pex16     | peroxisomal biogenesis factor 16                           | 3  | 0  | 3  |
| 9910484   | Pex3      | peroxisomal biogenesis factor 3                            | 1  | 0  | 1  |
| 254553500 | Pex5l     | peroxisomal biogenesis factor 5-like isoform 1             | 0  | 1  | 0  |
| 160333197 | Peci      | peroxisomal D3,D2-enoyl-CoA isomerase isoform a            | 4  | 1  | 0  |
| 10946966  | Pxmp4     | peroxisomal membrane protein 4                             | 1  | 1  | 1  |
| 256220343 | Dhrs4     | peroxisomal short-chain alcohol dehydrogenase isoform 2    | 8  | 14 | 3  |
| 164663880 | Ppara     | peroxisome proliferator activated receptor alpha           | 0  | 0  | 1  |
| 11528520  | Perp      | PERP, TP53 apoptosis effector                              | 0  | 0  | 1  |

|           |               |                                                                    |    |   |   |
|-----------|---------------|--------------------------------------------------------------------|----|---|---|
| 12584984  | Pes1          | pescadillo homolog 1, containing BRCT domain                       | 0  | 1 | 5 |
| 71480098  | Pcnp          | PEST proteolytic signal containing nuclear protein                 | 2  | 4 | 0 |
| 255683374 | Ppan          | peter pan homolog                                                  | 0  | 0 | 2 |
| 24025665  | Plekho2       | PH domain-containing protein homolog                               | 0  | 1 | 0 |
| 255522851 | Phf10         | PHD finger protein 10                                              | 0  | 4 | 0 |
| 198442868 | Phf12         | PHD finger protein 12                                              | 0  | 1 | 0 |
| 270288744 | Phf14         | PHD finger protein 14                                              | 0  | 5 | 3 |
| 40556368  | Phf16         | PHD finger protein 16                                              | 0  | 1 | 0 |
| 194328769 | Phf17         | PHD finger protein 17                                              | 1  | 1 | 1 |
| 31543476  | Phf2          | PHD finger protein 2                                               | 0  | 3 | 0 |
| 124487195 | Phf20l1       | PHD finger protein 20-like 1                                       | 1  | 0 | 0 |
| 226423861 | Phf23         | PHD finger protein 23                                              | 0  | 1 | 0 |
| 124487309 | Phf3          | PHD finger protein 3                                               | 0  | 3 | 0 |
| 33563292  | Phf6          | PHD finger protein 6                                               | 0  | 4 | 0 |
| 57222274  | 4921501E09Rik | PHD finger protein 8                                               | 0  | 0 | 1 |
| 164518891 | Phf8          | PHD finger protein 8 isoform b                                     | 1  | 0 | 0 |
| 24415990  | Phf5a         | PHD-finger 5A                                                      | 1  | 4 | 2 |
| 171543886 | Pah           | phenylalanine hydroxylase                                          | 0  | 1 | 0 |
| 162138894 | Farsa         | phenylalanyl-tRNA synthetase, alpha subunit                        | 1  | 3 | 1 |
| 31981400  | Farsb         | phenylalanyl-tRNA synthetase, beta subunit                         | 13 | 8 | 0 |
| 6681255   | Ebp           | phenylalkylamine Ca2+ antagonist (emopamil) binding protein        | 1  | 0 | 0 |
| 6679405   | Pnmt          | phenylethanolamine N-methyltransferase                             | 1  | 0 | 0 |
| 295317320 | Phactr3       | phosphatase and actin regulator 3 isoform 1                        | 1  | 0 | 0 |
| 23346533  | Phospho1      | phosphatase, orphan 1                                              | 0  | 0 | 1 |
| 31980842  | Pcyt2         | phosphate cytidylyltransferase 2, ethanolamine                     | 1  | 0 | 0 |
| 20149726  | Cds2          | phosphatidate cytidylyltransferase 2                               | 2  | 0 | 0 |
| 77861908  | Ppapdc2       | phosphatidic acid phosphatase type 2 domain containing 2           | 1  | 0 | 0 |
| 110431341 | Ppap2c        | phosphatidic acid phosphatase type 2c                              | 2  | 0 | 2 |
| 84794552  | Pebp1         | phosphatidylethanolamine binding protein 1                         | 5  | 0 | 1 |
| 110626163 | Pgs1          | phosphatidylglycerophosphate synthase 1                            | 1  | 1 | 0 |
| 241982771 | Pi4ka         | phosphatidylinositol 4-kinase type 3 alpha                         | 0  | 2 | 2 |
| 124486987 | Pigg          | phosphatidylinositol glycan anchor biosynthesis, class G           | 1  | 0 | 0 |
| 41872422  | Pigh          | phosphatidylinositol glycan anchor biosynthesis, class H           | 1  | 0 | 0 |
| 29789447  | Pigk          | phosphatidylinositol glycan anchor biosynthesis, class K isoform 1 | 3  | 0 | 0 |
| 167900470 | Pign          | phosphatidylinositol glycan anchor biosynthesis, class N           | 1  | 0 | 0 |
| 239937480 | Pigo          | phosphatidylinositol glycan anchor biosynthesis, class O           | 0  | 1 | 0 |
| 41351529  | Pigs          | phosphatidylinositol glycan anchor biosynthesis, class S           | 13 | 0 | 2 |
| 120587021 | Pigt          | phosphatidylinositol glycan, class T                               | 5  | 0 | 0 |
| 9790159   | Pitpnb        | phosphatidylinositol transfer protein, beta                        | 2  | 0 | 0 |
| 22003862  | Pitpnc1       | phosphatidylinositol transfer protein, cytoplasmic 1               | 0  | 1 | 0 |
| 31982833  | Pip5k1a       | phosphatidylinositol-4-phosphate 5-kinase, type I, alpha           | 0  | 1 | 0 |
| 226442759 | Pip5k1c       | phosphatidylinositol-4-phosphate 5-kinase, type I, gamma isoform 1 | 1  | 0 | 0 |
| 17298686  | Pip4k2c       | phosphatidylinositol-5-phosphate 4-kinase, type II, gamma          | 3  | 1 | 1 |
| 32567788  | Picalm        | phosphatidylinositol-binding clathrin assembly protein             | 3  | 5 | 2 |
| 126722757 | Pisd          | phosphatidylserine decarboxylase                                   | 0  | 0 | 1 |

|           |         |                                                                                                      |    |    |   |
|-----------|---------|------------------------------------------------------------------------------------------------------|----|----|---|
| 227330629 | Pde1a   | phosphodiesterase 1A isoform PDE1A2                                                                  | 0  | 1  | 0 |
| 23510241  | Pde4d   | phosphodiesterase 4D                                                                                 | 1  | 0  | 0 |
| 158749580 | Pde4dip | phosphodiesterase 4D interacting protein isoform 1                                                   | 1  | 0  | 0 |
| 260166631 | Pde5a   | phosphodiesterase 5A                                                                                 | 0  | 1  | 1 |
| 284005078 | Pde6c   | phosphodiesterase 6C                                                                                 | 0  | 1  | 0 |
| 31560653  | Pfkl    | phosphofructokinase, liver, B-type                                                                   | 21 | 2  | 3 |
| 9790051   | Pfkl    | phosphofructokinase, platelet                                                                        | 11 | 0  | 0 |
| 227330633 | Pgm2    | phosphoglucomutase 2                                                                                 | 13 | 0  | 0 |
| 124486895 | Pgd     | phosphogluconate dehydrogenase                                                                       | 9  | 0  | 1 |
| 52353955  | Phgdh   | phosphoglycerate dehydrogenase                                                                       | 12 | 0  | 8 |
| 70778976  | Pgk1    | phosphoglycerate kinase 1                                                                            | 20 | 0  | 5 |
| 226246531 | Pgk2    | phosphoglycerate kinase 2                                                                            | 1  | 0  | 0 |
| 254587962 | Pgam5   | phosphoglycerate mutase family member 5 isoform 2                                                    | 7  | 2  | 4 |
| 40254507  | Pgp     | phosphoglycolate phosphatase                                                                         | 8  | 0  | 0 |
| 110835706 | Plekha5 | phosphoinositol 3-phosphate-binding protein-2                                                        | 1  | 0  | 0 |
| 114431250 | Plaa    | phospholipase A2, activating protein                                                                 | 1  | 0  | 0 |
| 67972423  | Pla2g4f | phospholipase A2, group IVF                                                                          | 0  | 0  | 1 |
| 19527008  | Pla2g15 | phospholipase A2, group XV                                                                           | 1  | 0  | 1 |
| 124487227 | Plb1    | phospholipase B1 isoform 1                                                                           | 0  | 1  | 0 |
| 31982122  | Plcb3   | phospholipase C beta 3                                                                               | 9  | 25 | 0 |
| 29293803  | Plcb4   | phospholipase C beta 4                                                                               | 0  | 2  | 0 |
| 224967070 | Plcb1   | phospholipase C, beta 1 isoform 2                                                                    | 0  | 1  | 0 |
| 125347158 | Plcd4   | phospholipase C, delta 4 isoform 2                                                                   | 0  | 0  | 1 |
| 164565357 | Plch2   | phospholipase C, eta 2 isoform b                                                                     | 1  | 0  | 0 |
| 26986603  | Plcg2   | phospholipase C, gamma 2                                                                             | 0  | 0  | 1 |
| 22550102  | Plcz1   | phospholipase C, zeta 1                                                                              | 0  | 0  | 1 |
| 7242181   | Plid3   | phospholipase D family, member 3                                                                     | 0  | 2  | 0 |
| 194328695 | Plscr1  | phospholipid scramblase 1                                                                            | 4  | 0  | 0 |
| 281182714 | Plscr3  | phospholipid scramblase 3                                                                            | 1  | 0  | 0 |
| 8393988   | Pmm2    | phosphomannomutase 2                                                                                 | 2  | 0  | 0 |
| 254588058 | Pmvk    | phosphomevalonate kinase isoform 1                                                                   | 0  | 0  | 2 |
| 158186629 | N4bp2l2 | phosphonoformate immuno-associated protein 5                                                         | 1  | 0  | 0 |
| 31543456  | Pag1    | phosphoprotein associated with glycosphingolipid microdomains 1                                      | 1  | 0  | 0 |
| 21426847  | Pea15a  | phosphoprotein enriched in astrocytes 15 isoform 2                                                   | 3  | 0  | 1 |
| 10946854  | Prps1   | phosphoribosyl pyrophosphate synthetase 1                                                            | 7  | 0  | 0 |
| 30794182  | Prps1l1 | phosphoribosyl pyrophosphate synthetase 1-like 1                                                     | 1  | 0  | 0 |
| 13386146  | Prps2   | phosphoribosyl pyrophosphate synthetase 2                                                            | 1  | 0  | 0 |
| 256773299 | Prpsap2 | phosphoribosyl pyrophosphate synthetase-associated protein 2                                         | 2  | 0  | 0 |
| 13385434  | Paics   | phosphoribosylaminoimidazole carboxylase, phosphoribosylaminoimidazole succinocarboxamide synthetase | 3  | 0  | 2 |
| 226958458 | Pfas    | phosphoribosylformylglycinamide synthase (FGAR amidotransferase)                                     | 4  | 0  | 0 |
| 93102415  | Gart    | phosphoribosylglycinamide formyltransferase                                                          | 9  | 0  | 0 |
| 253314458 | Phax    | phosphorylated adaptor for RNA export isoform 1                                                      | 0  | 0  | 1 |
| 329299029 | Psat1   | phosphoserine aminotransferase 1                                                                     | 16 | 0  | 2 |
| 88014628  | Pstk    | phosphoserine-tRNA kinase                                                                            | 0  | 0  | 1 |
| 242397487 | Phyipl  | phytanoyl-CoA hydroxylase interacting protein-like isoform 1                                         | 0  | 1  | 1 |
| 160707978 | Pclo    | piccolo isoform 1                                                                                    | 1  | 0  | 1 |
| 25777750  | Pgbd5   | piggyBac transposable element derived 5                                                              | 0  | 0  | 1 |
| 20982845  | Fus     | pigpen                                                                                               | 9  | 10 | 6 |

|           |               |                                                                                        |    |    |     |
|-----------|---------------|----------------------------------------------------------------------------------------|----|----|-----|
| 18129616  | 2610028A01Rik | PIN2/TRF1-interacting protein                                                          | 0  | 1  | 1   |
| 112420990 | Pnn           | pinin                                                                                  | 4  | 7  | 21  |
| 126032319 | Pitpnm3       | Pitpnm family member 3 isoform 1                                                       | 0  | 0  | 1   |
| 21699068  | Pitrm1        | pitrilysin metallopeptidase 1                                                          | 21 | 2  | 0   |
| 10946612  | Piwil1        | piwi like homolog 1                                                                    | 0  | 0  | 1   |
| 52138556  | Piwil4        | piwi-like 4                                                                            | 1  | 0  | 0   |
| 14861844  | D1Pas1        | PL10 protein                                                                           | 2  | 0  | 1   |
| 124286797 | 1600029D21Rik | placenta expressed transcript 1                                                        | 1  | 1  | 2   |
| 9790161   | Pkp1          | plakophilin 1                                                                          | 0  | 1  | 1   |
| 21312960  | Pkp2          | plakophilin 2                                                                          | 0  | 0  | 17  |
| 242332587 | Pkp3          | plakophilin 3 isoform 1                                                                | 0  | 0  | 4   |
| 147899467 | Pkp4          | plakophilin 4 isoform 1                                                                | 1  | 0  | 12  |
| 157041252 | S3-12         | plasma membrane associated protein, S3-12                                              | 1  | 0  | 0   |
| 62234487  | Atp2b1        | plasma membrane calcium ATPase 1                                                       | 6  | 0  | 0   |
| 80861454  | Atp2b2        | plasma membrane calcium ATPase 2 isoform 1                                             | 3  | 0  | 1   |
| 56699478  | Atp2b3        | plasma membrane calcium ATPase 3                                                       | 1  | 0  | 0   |
| 269784615 | Atp2b4        | plasma membrane calcium ATPase 4                                                       | 3  | 0  | 0   |
| 20279132  | Plp           | plasma membrane proteolipid                                                            | 0  | 0  | 1   |
| 257471003 | Plg           | plasminogen                                                                            | 0  | 0  | 1   |
| 85986577  | Pls1          | plastin 1 (I-isoform)                                                                  | 3  | 3  | 2   |
| 262050551 | Pls3          | plastin 3 precursor                                                                    | 14 | 18 | 4   |
| 74024915  | Pecam1        | platelet/endothelial cell adhesion molecule 1 isoform 1                                | 0  | 0  | 1   |
| 7305363   | Pafah1b1      | platelet-activating factor acetylhydrolase, isoform Ib, alpha subunit                  | 2  | 9  | 0   |
| 40254624  | Pafah1b2      | platelet-activating factor acetylhydrolase, isoform Ib, beta subunit                   | 3  | 0  | 0   |
| 6679201   | Pafah1b3      | platelet-activating factor acetylhydrolase, isoform Ib, gamma subunit                  | 4  | 0  | 1   |
| 163644296 | Psd3          | pleckstrin and Sec7 domain containing 3 isoform 2                                      | 1  | 0  | 0   |
| 51317392  | Psd           | pleckstrin and Sec7 domain containing homolog                                          | 0  | 0  | 1   |
| 237681204 | Plekha6       | pleckstrin homology domain containing, family A member 6 isoform 1                     | 0  | 3  | 10  |
| 27370088  | Plekha7       | pleckstrin homology domain containing, family A member 7                               | 0  | 0  | 1   |
| 167621502 | Plekhg3       | pleckstrin homology domain containing, family G (with RhoGef domain) member 3          | 0  | 0  | 11  |
| 124487489 | Plekhg4       | pleckstrin homology domain containing, family G (with RhoGef domain) member 4          | 0  | 0  | 1   |
| 256818761 | Plekhh1       | pleckstrin homology domain containing, family H (with MyTH4 domain) member 1 isoform 1 | 0  | 1  | 0   |
| 33942120  | Plekhn1       | pleckstrin homology domain containing, family M (with RUN domain) member 1             | 0  | 1  | 0   |
| 124487035 | Phip          | pleckstrin homology domain interacting protein                                         | 0  | 0  | 3   |
| 226442929 | Phlda1        | pleckstrin homology-like domain, family A, member 1                                    | 0  | 0  | 1   |
| 188528897 | Phldb2        | pleckstrin homology-like domain, family B, member 2                                    | 1  | 0  | 1   |
| 156616318 | Phldb3        | pleckstrin homology-like domain, family B, member 3                                    | 0  | 0  | 1   |
| 256000747 | Plec1         | plectin 1 isoform 1b                                                                   | 65 | 52 | 201 |
| 34610215  | Plagl2        | pleiomorphic adenoma gene-like 2                                                       | 1  | 0  | 2   |
| 31980791  | Plrg1         | pleiotropic regulator 1                                                                | 1  | 13 | 5   |
| 113722113 | Plxna2        | plexin A2                                                                              | 1  | 0  | 0   |
| 171543899 | Plxna4        | plexin A4                                                                              | 1  | 0  | 0   |
| 226958476 | Plxnb2        | plexin B2 isoform 13                                                                   | 32 | 0  | 0   |
| 153792704 | Plxnd1        | plexin D1                                                                              | 0  | 0  | 1   |
| 160333703 | Kdm5b         | PLU1                                                                                   | 0  | 1  | 1   |

|           |         |                                                                   |    |    |    |
|-----------|---------|-------------------------------------------------------------------|----|----|----|
| 260099686 | Pogz    | pogo transposable element with ZNF domain                         | 0  | 3  | 4  |
| 228480275 | Pvrl2   | poliovirus receptor-related 2 isoform 1                           | 2  | 0  | 0  |
| 65508357  | Plk5    | polo-like kinase 5                                                | 0  | 1  | 0  |
| 20806109  | Parp1   | poly (ADP-ribose) polymerase family, member 1                     | 1  | 16 | 0  |
| 25014095  | Parp3   | poly (ADP-ribose) polymerase family, member 3                     | 0  | 3  | 1  |
| 281485553 | Parp4   | poly (ADP-ribose) polymerase family, member 4                     | 0  | 0  | 1  |
| 13384918  | Parp9   | poly (ADP-ribose) polymerase family, member 9                     | 0  | 0  | 1  |
| 6754972   | Pabpc2  | poly A binding protein, cytoplasmic 2                             | 0  | 0  | 1  |
| 31560656  | Pabpc1  | poly(A) binding protein, cytoplasmic 1                            | 21 | 1  | 18 |
| 34419622  | Pabpc4  | poly(A) binding protein, cytoplasmic 4 isoform 2                  | 1  | 0  | 1  |
| 9506945   | Pabpn1  | poly(A) binding protein, nuclear 1                                | 0  | 4  | 7  |
| 21311877  | Parn    | poly(A)-specific ribonuclease (deadenylation nuclease)            | 1  | 2  | 0  |
| 6754994   | Pcbp1   | poly(rC) binding protein 1                                        | 11 | 11 | 9  |
| 157057549 | Pcbp2   | poly(rC) binding protein 2 isoform 2                              | 11 | 21 | 15 |
| 9910570   | Pmfbp1  | polyamine modulated factor 1 binding protein 1                    | 1  | 0  | 0  |
| 13385420  | Pmf1    | polyamine-modulated factor 1                                      | 0  | 2  | 0  |
| 124486951 | Pbrm1   | polybromo 1                                                       | 0  | 35 | 3  |
| 37574111  | Pcgf1   | polycomb group ring finger 1                                      | 0  | 1  | 0  |
| 28076973  | Pcgf6   | polycomb group ring finger 6                                      | 0  | 1  | 0  |
| 29135339  | Pkhd11  | polycystic kidney and hepatic disease 1-like 1                    | 1  | 0  | 0  |
| 294862233 | Pkd1l2  | polycystin 1-like 2                                               | 1  | 0  | 1  |
| 31980927  | Pqbp1   | polyglutamine binding protein 1                                   | 0  | 1  | 1  |
| 110835733 | Phc1    | polyhomeotic-like 1 isoform a                                     | 0  | 1  | 0  |
| 32189421  | Polr1d  | polymerase (RNA) I polypeptide D isoform 1                        | 0  | 3  | 0  |
| 29336059  | Polr2c  | polymerase (RNA) II (DNA directed) polypeptide C                  | 1  | 2  | 10 |
| 28076931  | Polr2d  | polymerase (RNA) II (DNA directed) polypeptide D isoform 2        | 0  | 2  | 4  |
| 124249077 | Polr2e  | polymerase (RNA) II (DNA directed) polypeptide E                  | 1  | 3  | 6  |
| 13385826  | Polr2g  | polymerase (RNA) II (DNA directed) polypeptide G                  | 0  | 4  | 5  |
| 21704118  | Polr2h  | polymerase (RNA) II (DNA directed) polypeptide H                  | 1  | 4  | 2  |
| 110625757 | Polr2i  | polymerase (RNA) II (DNA directed) polypeptide I                  | 0  | 1  | 1  |
| 86355514  | Polr2k  | polymerase (RNA) II (DNA directed) polypeptide K isoform b        | 0  | 1  | 0  |
| 219881031 | Polr2l  | polymerase (RNA) II (DNA directed) polypeptide L                  | 0  | 2  | 1  |
| 124486963 | Polr3a  | polymerase (RNA) III (DNA directed) polypeptide A, 155kDa         | 0  | 1  | 0  |
| 27229271  | Polr3h  | polymerase (RNA) III (DNA directed) polypeptide H                 | 0  | 1  | 0  |
| 14780884  | Poldip2 | polymerase delta interacting protein 38                           | 3  | 0  | 1  |
| 6679567   | Ptrf    | polymerase I and transcript release factor                        | 1  | 2  | 0  |
| 118601009 | Pnkp    | polynucleotide kinase &apos; phosphatase                          | 0  | 13 | 0  |
| 326368217 | Reep6   | polyposis locus protein 1-like 1                                  | 2  | 0  | 0  |
| 116517303 | Ptbp1   | polypyrimidine tract binding protein 1 isoform 2                  | 13 | 30 | 18 |
| 9507003   | Ptbp2   | polypyrimidine tract binding protein 2                            | 0  | 8  | 1  |
| 25188204  | Pnpt1   | polyribonucleotide nucleotidyltransferase 1                       | 1  | 6  | 0  |
| 257196183 | Puf60   | poly-U binding splicing factor 60 isoform a                       | 4  | 23 | 3  |
| 23956336  | Pms1    | postmeiotic segregation increased 1                               | 0  | 1  | 0  |
| 126517505 | Kcmf1   | potassium channel modulatory factor 1                             | 2  | 0  | 0  |
| 161333815 | Kctd9   | potassium channel tetramerisation domain containing 9 isoform b   | 0  | 1  | 0  |
| 123701966 | Kctd12  | potassium channel tetramerization domain containing 12            | 0  | 1  | 0  |
| 229577268 | Kctd18  | potassium channel tetramerization domain containing 18 isoform 3  | 0  | 1  | 0  |
| 120300928 | Kcnu1   | potassium channel, subfamily U, member 1                          | 0  | 1  | 0  |
| 22122333  | Kcnc4   | potassium voltage gated channel, Shaw-related subfamily, member 4 | 0  | 0  | 1  |

|           |          |                                                                                                |    |    |    |
|-----------|----------|------------------------------------------------------------------------------------------------|----|----|----|
| 54873660  | Kcnq2    | potassium voltage-gated channel KQT-like protein 2 isoform 6                                   | 1  | 0  | 0  |
| 23943842  | Kcng3    | potassium voltage-gated channel, subfamily G, member 3                                         | 0  | 0  | 1  |
| 116875836 | Kcnh7    | potassium voltage-gated channel, subfamily H (eag-related), member 7                           | 1  | 0  | 0  |
| 172073164 | Prdm1    | PR domain containing 1, with ZNF domain                                                        | 1  | 1  | 0  |
| 124249099 | Prdm10   | PR domain containing 10                                                                        | 0  | 2  | 0  |
| 226531251 | Prdm15   | PR domain containing 15                                                                        | 1  | 0  | 0  |
| 20070422  | Praf2    | PRA1 domain family 2                                                                           | 1  | 0  | 0  |
| 34365779  | Pbx1     | pre B-cell leukemia transcription factor 1 isoform a                                           | 0  | 3  | 0  |
| 7949105   | Pbx3     | pre B-cell leukemia transcription factor 3                                                     | 0  | 0  | 1  |
| 22122651  | Pbxip1   | pre-B-cell leukemia transcription factor interacting protein 1                                 | 1  | 0  | 0  |
| 162329547 | Gm10070  | predicted gene 10070                                                                           | 3  | 3  | 4  |
| 124486863 | Gm12695  | predicted gene 12695                                                                           | 0  | 0  | 1  |
| 154759295 | Gm15450  | predicted gene 15450                                                                           | 2  | 4  | 4  |
| 153792123 | Gm4696   | predicted gene 4696                                                                            | 0  | 0  | 1  |
| 124486993 | Gm5560   | predicted gene 5560                                                                            | 7  | 1  | 5  |
| 124486640 | Gm9294   | predicted gene 9294                                                                            | 10 | 5  | 8  |
| 154147571 | 677156   | predicted gene, 677156                                                                         | 0  | 0  | 1  |
| 218505708 | Gm8994   | predicted gene, EG668137                                                                       | 1  | 9  | 14 |
| 215490077 | Gm10094  | predicted gene, ENSMUSG00000061104                                                             | 0  | 6  | 4  |
| 13385532  | Pfdn1    | prefoldin 1                                                                                    | 1  | 0  | 0  |
| 31981577  | Pfdn2    | prefoldin 2                                                                                    | 2  | 0  | 0  |
| 156938259 | Psg16    | pregnancy specific glycoprotein 16                                                             | 1  | 0  | 0  |
| 110347469 | Pzp      | pregnancy zone protein                                                                         | 1  | 1  | 1  |
| 40254521  | Mobkl3   | preimplantation protein 3                                                                      | 0  | 1  | 0  |
| 268370153 | Pcf11    | pre-mRNA cleavage complex II protein Pcf11                                                     | 1  | 0  | 0  |
| 256665245 | Cpsf7    | pre-mRNA cleavage factor I, 59 kDa subunit                                                     | 0  | 14 | 1  |
| 115583687 | Prpf8    | pre-mRNA processing factor 8                                                                   | 5  | 99 | 78 |
| 269973905 | Pdss2    | prenyl diphosphate synthase, subunit 2                                                         | 1  | 0  | 0  |
| 13385294  | Pcyox1   | prenylcysteine oxidase 1                                                                       | 11 | 0  | 0  |
| 326537301 | Pnoc     | prepronociceptin                                                                               | 1  | 0  | 0  |
| 190684663 | Psen2    | presenilin 2                                                                                   | 0  | 1  | 0  |
| 28201983  | Prickle3 | prickle homolog 3                                                                              | 0  | 1  | 1  |
| 197333835 | Prickle2 | prickle-like 2 isoform a                                                                       | 0  | 1  | 0  |
| 87196490  | Pawr     | PRKC, apoptosis, WT1, regulator                                                                | 0  | 3  | 0  |
| 114158701 | Nop14    | probable nucleolar complex protein 14                                                          | 0  | 0  | 5  |
| 20270200  | Pop5     | processing of precursor 5                                                                      | 0  | 2  | 0  |
| 111120329 | Col1a2   | procollagen, type I, alpha 2                                                                   | 1  | 0  | 2  |
| 34328045  | Col4a4   | procollagen, type IV, alpha 4                                                                  | 2  | 0  | 0  |
| 115647999 | Col7a1   | procollagen, type VII, alpha 1                                                                 | 0  | 1  | 0  |
| 226423922 | Col14a1  | procollagen, type XIV, alpha 1                                                                 | 0  | 1  | 0  |
| 40789282  | Col18a1  | procollagen, type XVIII, alpha 1 isoform 2                                                     | 4  | 5  | 8  |
| 116326001 | Col24a1  | procollagen, type XXIV, alpha 1                                                                | 0  | 1  | 0  |
| 116063546 | Col27a1  | procollagen, type XXVII, alpha 1                                                               | 0  | 0  | 1  |
| 6755110   | Plod3    | procollagen-lysine, 2-oxoglutarate 5-dioxygenase 3                                             | 1  | 1  | 0  |
| 33859596  | P4ha1    | procollagen-proline, 2-oxoglutarate 4-dioxygenase (proline 4-hydroxylase), alpha 1 polypeptide | 14 | 1  | 0  |
| 6755040   | Pfn1     | profilin 1                                                                                     | 8  | 2  | 7  |
| 31980806  | Pgrmc1   | progesterone receptor membrane component                                                       | 10 | 0  | 2  |
| 226442772 | Pgrmc2   | progesterone receptor membrane component 2                                                     | 6  | 0  | 2  |
| 31560391  | Pdcd10   | programmed cell death 10                                                                       | 6  | 3  | 0  |
| 120407033 | Pdcd2    | programmed cell death 2                                                                        | 1  | 0  | 0  |

|           |           |                                                            |    |    |    |
|-----------|-----------|------------------------------------------------------------|----|----|----|
| 270309161 | Pdcd4     | programmed cell death 4                                    | 10 | 0  | 0  |
| 6755000   | Pdcd6     | programmed cell death 6                                    | 1  | 0  | 0  |
| 258547156 | Pdcd6ip   | programmed cell death 6 interacting protein                | 7  | 0  | 1  |
| 54607128  | Pdcd11    | programmed cell death protein 11                           | 0  | 28 | 23 |
| 148271093 | Pdcd7     | programmed cell death protein 7                            | 1  | 1  | 0  |
| 6679299   | Phb       | prohibitin                                                 | 9  | 0  | 8  |
| 254675324 | Prlr      | prolactin receptor                                         | 0  | 1  | 0  |
| 158749640 | Preb      | prolactin regulatory element binding protein               | 3  | 0  | 0  |
| 7242171   | Pcna      | proliferating cell nuclear antigen                         | 2  | 4  | 8  |
| 118601004 | Prodh     | proline dehydrogenase                                      | 20 | 0  | 0  |
| 153791304 | Prr12     | proline rich 12                                            | 0  | 2  | 0  |
| 283945467 | Prr13     | proline rich 13                                            | 1  | 0  | 0  |
| 34328357  | Prr14     | proline rich 14                                            | 1  | 0  | 0  |
| 255308901 | Prr18     | proline rich region 18                                     | 1  | 0  | 0  |
| 84872187  | Prosc     | proline synthetase co-transcribed isoform a                | 1  | 0  | 0  |
| 257900472 | Pelp1     | proline-, glutamic acid-, leucine-rich protein 1           | 0  | 4  | 2  |
| 90991706  | Zfc3h1    | proline/serine-rich coiled-coil 2                          | 1  | 0  | 0  |
| 226874876 | P4ha2     | prolyl 4-hydroxylase, alpha II subunit isoform 2           | 0  | 0  | 1  |
| 42415475  | P4hb      | prolyl 4-hydroxylase, beta polypeptide                     | 27 | 2  | 2  |
| 6755152   | Prep      | prolyl endopeptidase                                       | 9  | 0  | 0  |
| 33469015  | Prcp      | prolylcarboxypeptidase                                     | 1  | 0  | 0  |
| 254675316 | Prom1     | prominin 1 isoform s1                                      | 2  | 0  | 0  |
| 224994184 | Prom2     | prominin 2 isoform 1                                       | 2  | 0  | 0  |
| 160333286 | Pml       | promyelocytic leukemia isoform 2                           | 0  | 3  | 9  |
| 13385310  | Pccb      | propionyl Coenzyme A carboxylase, beta polypeptide         | 14 | 0  | 0  |
| 254540162 | Pcca      | propionyl-Coenzyme A carboxylase, alpha polypeptide        | 18 | 0  | 0  |
| 161086990 | Prosapip1 | ProSAPiP1 protein                                          | 0  | 1  | 0  |
| 225735657 | Psap      | prosaposin isoform B preproprotein                         | 10 | 3  | 1  |
| 260763900 | Ptges2    | prostaglandin E synthase 2                                 | 6  | 0  | 0  |
| 50845420  | Ptgfrn    | prostaglandin F2 receptor negative regulator precursor     | 4  | 0  | 0  |
| 9790017   | Ptges3    | prostaglandin-E synthase 3                                 | 4  | 3  | 4  |
| 6679537   | Ptgs1     | prostaglandin-endoperoxide synthase 1                      | 7  | 0  | 0  |
| 19111160  | Prss8     | prostasin                                                  | 0  | 0  | 1  |
| 20149318  | Ptov1     | prostate tumor over expressed gene 1                       | 0  | 1  | 0  |
| 6679501   | Psmc1     | protease (prosome, macropain) 26S subunit, ATPase 1        | 14 | 0  | 0  |
| 7110703   | Psmc5     | protease (prosome, macropain) 26S subunit, ATPase 5        | 10 | 0  | 1  |
| 116089322 | Lonp1     | protease, serine, 15                                       | 28 | 20 | 6  |
| 111607469 | Prss1     | protease, serine-like 1                                    | 0  | 1  | 0  |
| 33859604  | Psmc2     | proteasome (prosome, macropain) 26S subunit, ATPase 2      | 9  | 0  | 1  |
| 228008337 | Psmc3     | proteasome (prosome, macropain) 26S subunit, ATPase 3      | 9  | 0  | 0  |
| 6754724   | Psmc7     | proteasome (prosome, macropain) 26S subunit, non-ATPase, 7 | 8  | 0  | 0  |
| 6755212   | Psmc1     | proteasome (prosome, macropain) 28 subunit, alpha          | 14 | 0  | 0  |
| 33563282  | Psmc1     | proteasome (prosome, macropain) subunit, alpha type 1      | 9  | 0  | 0  |
| 261824000 | Psmc3     | proteasome (prosome, macropain) subunit, alpha type 3      | 2  | 0  | 0  |
| 7106387   | Psmc5     | proteasome (prosome, macropain) subunit, alpha type 5      | 1  | 2  | 2  |
| 6755198   | Psmc6     | proteasome (prosome, macropain) subunit, alpha type 6      | 12 | 1  | 1  |
| 7106389   | Psmc7     | proteasome (prosome, macropain) subunit, alpha type 7      | 7  | 3  | 0  |
| 7242197   | Psmc1     | proteasome (prosome, macropain) subunit, beta type 1       | 9  | 2  | 0  |
| 227116345 | Psmc2     | proteasome (prosome, macropain) subunit, beta type 2       | 6  | 1  | 0  |
| 6755204   | Psmc5     | proteasome (prosome, macropain) subunit, beta type 5       | 11 | 3  | 0  |
| 6755206   | Psmc7     | proteasome (prosome, macropain) subunit, beta type 7       | 6  | 0  | 0  |



|           |         |                                                                              |    |    |    |
|-----------|---------|------------------------------------------------------------------------------|----|----|----|
| 124248577 | Psmc4   | proteasome 26S ATPase subunit 4                                              | 14 | 1  | 2  |
| 27754103  | Psmc6   | proteasome 26S ATPase subunit 6                                              | 9  | 0  | 0  |
| 74315975  | Psmc1   | proteasome 26S non-ATPase subunit 1                                          | 14 | 0  | 1  |
| 134053905 | Psmc11  | proteasome 26S non-ATPase subunit 11                                         | 11 | 0  | 1  |
| 13385384  | Psmc12  | proteasome 26S non-ATPase subunit 12                                         | 4  | 0  | 1  |
| 6755210   | Psmc13  | proteasome 26S non-ATPase subunit 13                                         | 9  | 1  | 1  |
| 19882201  | Psmc2   | proteasome 26S non-ATPase subunit 2                                          | 10 | 0  | 3  |
| 19705424  | Psmc3   | proteasome 26S non-ATPase subunit 3                                          | 16 | 1  | 0  |
| 6679505   | Psmc4   | proteasome 26S non-ATPase subunit 4                                          | 4  | 0  | 0  |
| 134053913 | Psmc5   | proteasome 26S non-ATPase subunit 5                                          | 6  | 0  | 1  |
| 156713423 | Psmc8   | proteasome 26S non-ATPase subunit 8                                          | 4  | 0  | 0  |
| 119508441 | Psmc9   | proteasome 26S non-ATPase subunit 9                                          | 1  | 0  | 0  |
| 145966883 | Psmc14  | proteasome 26S subunit, non-ATPase 14                                        | 5  | 0  | 1  |
| 71725358  | Psmc2   | proteasome activator subunit 2 isoform 1                                     | 10 | 0  | 0  |
| 6755214   | Psmc3   | proteasome activator subunit 3                                               | 3  | 0  | 0  |
| 6755196   | Psmc4   | proteasome alpha 4 subunit                                                   | 4  | 0  | 0  |
| 6755202   | Psmc3   | proteasome beta 3 subunit                                                    | 8  | 4  | 0  |
| 254540082 | Psmc4   | proteasome beta 4 subunit                                                    | 5  | 2  | 0  |
| 238231384 | Psmc6   | proteasome beta 6 subunit                                                    | 3  | 1  | 0  |
| 134031994 | Psmc2   | proteasome subunit alpha type 2                                              | 5  | 2  | 0  |
| 46049022  | Psmc6   | proteasome, 26S, non-ATPase regulatory subunit 6                             | 8  | 0  | 0  |
| 113931156 | Pin4    | protein (peptidyl-prolyl cis/trans isomerase) NIMA-interacting, 4 (parvulin) | 0  | 1  | 0  |
| 188528624 | Prmt5   | protein arginine methyltransferase 5                                         | 1  | 0  | 0  |
| 21703808  | Prmt7   | protein arginine methyltransferase 7                                         | 0  | 0  | 1  |
| 9790109   | Prmt1   | protein arginine N-methyltransferase 1                                       | 1  | 3  | 0  |
| 86198316  | Pdia4   | protein disulfide isomerase A4                                               | 23 | 3  | 0  |
| 30794140  | Pdia5   | protein disulfide isomerase A5                                               | 0  | 8  | 0  |
| 58037267  | Pdia6   | protein disulfide isomerase A6                                               | 2  | 0  | 1  |
| 112293264 | Pdia3   | protein disulfide-isomerase A3                                               | 35 | 12 | 10 |
| 226958422 | Pacsin2 | protein kinase C and casein kinase substrate in neurons 2                    | 2  | 8  | 0  |
| 163644252 | Pacsin3 | protein kinase C and casein kinase substrate in neurons 3                    | 0  | 7  | 2  |
| 6679465   | Prkcsh  | protein kinase C substrate 80K-H                                             | 16 | 0  | 1  |
| 6755082   | Prkcd   | protein kinase C, delta                                                      | 0  | 0  | 1  |
| 6755080   | Prkcc   | protein kinase C, gamma                                                      | 0  | 0  | 1  |
| 133778989 | Prkci   | protein kinase C, iota                                                       | 2  | 3  | 0  |
| 6679353   | Prkcq   | protein kinase C, theta                                                      | 0  | 1  | 0  |
| 284005389 | Prkd3   | protein kinase D3                                                            | 0  | 1  | 0  |
| 94681061  | Prkaa1  | protein kinase, AMP-activated, alpha 1 catalytic subunit                     | 6  | 0  | 1  |
| 24371223  | Prkag3  | protein kinase, AMP-activated, gamma 3 non-catalytic subunit                 | 1  | 0  | 0  |
| 30794476  | Prkar1a | protein kinase, cAMP dependent regulatory, type I, alpha                     | 2  | 0  | 0  |
| 22550094  | Prkar2a | protein kinase, cAMP dependent regulatory, type II alpha                     | 2  | 0  | 0  |
| 45598396  | Prkar2b | protein kinase, cAMP dependent regulatory, type II beta                      | 7  | 0  | 1  |
| 7110693   | Prkaca  | protein kinase, cAMP dependent, catalytic, alpha                             | 3  | 1  | 0  |
| 255958320 | Prkacb  | protein kinase, cAMP dependent, catalytic, beta                              | 1  | 0  | 0  |
| 124517706 | Prkdc   | protein kinase, DNA-activated, catalytic polypeptide                         | 0  | 36 | 1  |
| 6755162   | Prkra   | protein kinase, interferon inducible double stranded RNA dependent activator | 0  | 0  | 2  |
| 110625699 | Pkmyt1  | protein kinase, membrane associated tyrosine/threonine 1                     | 0  | 0  | 1  |
| 21703812  | Slc10a3 | protein P3                                                                   | 0  | 0  | 1  |

|           |          |                                                                                                           |    |    |    |
|-----------|----------|-----------------------------------------------------------------------------------------------------------|----|----|----|
| 13994195  | Ppp1ca   | protein phosphatase 1, catalytic subunit, alpha                                                           | 13 | 20 | 14 |
| 161484668 | Ppp1cb   | protein phosphatase 1, catalytic subunit, beta isoform                                                    | 3  | 8  | 3  |
| 31980772  | Ppp1cc   | protein phosphatase 1, catalytic subunit, gamma isoform                                                   | 0  | 1  | 0  |
| 95772123  | Ppp1r12a | protein phosphatase 1, regulatory (inhibitor) subunit 12A                                                 | 1  | 10 | 0  |
| 124486803 | Ppp1r12b | protein phosphatase 1, regulatory (inhibitor) subunit 12B                                                 | 0  | 1  | 0  |
| 22122685  | Ppp1r8   | protein phosphatase 1, regulatory (inhibitor) subunit 8                                                   | 0  | 9  | 0  |
| 31711997  | Ppp1r9a  | protein phosphatase 1, regulatory (inhibitor) subunit 9A                                                  | 0  | 0  | 1  |
| 124249341 | Ppp1r12c | protein phosphatase 1, regulatory subunit 12C                                                             | 0  | 1  | 0  |
| 50053703  | Ppp1r9b  | protein phosphatase 1, regulatory subunit 9B                                                              | 0  | 0  | 2  |
| 6679443   | Ppm1a    | protein phosphatase 1A, magnesium dependent, alpha isoform                                                | 0  | 0  | 1  |
| 6679793   | Ppm1g    | protein phosphatase 1G (formerly 2C), magnesium-dependent, gamma isoform                                  | 3  | 0  | 0  |
| 9506983   | Ppp2ca   | protein phosphatase 2a, catalytic subunit, alpha isoform                                                  | 3  | 6  | 2  |
| 254587947 | Ppp2r4   | protein phosphatase 2A, regulatory subunit B                                                              | 1  | 0  | 0  |
| 22726177  | Ppp2r2d  | protein phosphatase 2A, regulatory subunit B, delta isoform                                               | 1  | 0  | 0  |
| 45592930  | Ppp3cb   | protein phosphatase 3, catalytic subunit, beta                                                            | 0  | 0  | 1  |
| 9790175   | Ppp4c    | protein phosphatase 4, catalytic subunit                                                                  | 0  | 0  | 1  |
| 166706862 | Ppp4r1   | protein phosphatase 4, regulatory subunit 1 isoform b                                                     | 0  | 1  | 0  |
| 33636709  | Ppp4r2   | protein phosphatase 4, regulatory subunit 2                                                               | 2  | 0  | 0  |
| 21312758  | Ppp6c    | protein phosphatase 6, catalytic subunit                                                                  | 0  | 0  | 1  |
| 255308881 | Ppp1r10  | protein phosphatase 1 isoform 2                                                                           | 0  | 10 | 1  |
| 12963569  | Ppp1r7   | protein phosphatase-1 regulatory subunit 7                                                                | 3  | 0  | 0  |
| 46309455  | Pros1    | protein S, alpha                                                                                          | 1  | 0  | 0  |
| 6755226   | Ptp4a1   | protein tyrosine phosphatase 4a1                                                                          | 0  | 3  | 0  |
| 258613926 | Ptp4a2   | protein tyrosine phosphatase 4a2                                                                          | 0  | 2  | 0  |
| 23956130  | Ptpmt1   | protein tyrosine phosphatase, mitochondrial 1                                                             | 1  | 1  | 1  |
| 133505845 | Ptpn1    | protein tyrosine phosphatase, non-receptor type 1                                                         | 3  | 0  | 0  |
| 134948762 | Ptpn13   | protein tyrosine phosphatase, non-receptor type 13                                                        | 0  | 0  | 1  |
| 110825986 | Ptpn14   | protein tyrosine phosphatase, non-receptor type 14                                                        | 0  | 1  | 1  |
| 124517678 | Ptpn23   | protein tyrosine phosphatase, non-receptor type 23                                                        | 2  | 0  | 0  |
| 118130785 | Ptpn6    | protein tyrosine phosphatase, non-receptor type 6 isoform b                                               | 0  | 1  | 0  |
| 153945814 | Ptpre    | protein tyrosine phosphatase, receptor type, E                                                            | 1  | 0  | 0  |
| 161016786 | Ppfia3   | protein tyrosine phosphatase, receptor type, f polypeptide (PTPRF), interacting protein (liprin), alpha 3 | 1  | 0  | 0  |
| 304361734 | Ppfia1   | protein tyrosine phosphatase, receptor type, f polypeptide (PTPRF), interacting protein, alpha 1          | 0  | 0  | 1  |
| 153791843 | Ptprg    | protein tyrosine phosphatase, receptor type, G                                                            | 1  | 0  | 0  |
| 145046271 | Ptprh    | protein tyrosine phosphatase, receptor type, H                                                            | 0  | 0  | 1  |
| 208609941 | PtpRJ    | protein tyrosine phosphatase, receptor type, J isoform 1                                                  | 1  | 0  | 0  |
| 6679561   | PtpRK    | protein tyrosine phosphatase, receptor type, K precursor                                                  | 1  | 0  | 0  |
| 226054321 | PtpRM    | protein tyrosine phosphatase, receptor type, M                                                            | 1  | 0  | 1  |
| 116089339 | PtpRN    | protein tyrosine phosphatase, receptor type, N                                                            | 0  | 0  | 1  |
| 171184435 | Ptplad1  | protein tyrosine phosphatase-like A domain containing 1                                                   | 2  | 0  | 1  |
| 84872191  | Ptplb    | protein tyrosine phosphatase-like protein PTPLB                                                           | 1  | 0  | 0  |
| 226530884 | Pcmt1    | protein-L-isoaspartate (D-aspartate) O-methyltransferase 1                                                | 4  | 0  | 0  |
| 23956398  | Pcmt2    | protein-L-isoaspartate (D-aspartate) O-methyltransferase domain containing 2                              | 0  | 1  | 0  |

|           |          |                                                                                                              |    |    |    |
|-----------|----------|--------------------------------------------------------------------------------------------------------------|----|----|----|
| 171543841 | Fyn      | protein-tyrosine kinase fyn isoform b                                                                        | 1  | 1  | 1  |
| 9790169   | Plp2     | proteolipid protein 2                                                                                        | 1  | 0  | 2  |
| 7110705   | Ptma     | prothymosin alpha                                                                                            | 6  | 0  | 0  |
| 157426851 | Pcdh19   | protocadherin 19 isoform a                                                                                   | 0  | 0  | 1  |
| 282165827 | Pcdh24   | protocadherin 24                                                                                             | 0  | 0  | 1  |
| 18087793  | Pcdhb15  | protocadherin beta 15                                                                                        | 0  | 0  | 1  |
| 113866017 | Pcdhb3   | protocadherin beta 3                                                                                         | 1  | 0  | 0  |
| 18087781  | Pcdhb6   | protocadherin beta 6                                                                                         | 0  | 0  | 1  |
| 16716433  | Pcdhb8   | protocadherin beta 8                                                                                         | 0  | 0  | 1  |
| 18087769  | Pcdhga9  | protocadherin gamma subfamily A, 9                                                                           | 1  | 0  | 0  |
| 148747543 | Pcdhgb1  | protocadherin gamma subfamily B, 1                                                                           | 1  | 0  | 0  |
| 40254503  | Prpf18   | PRP18 pre-mRNA processing factor 18 homolog                                                                  | 1  | 2  | 0  |
| 31980657  | Prpf3    | PRP3 pre-mRNA processing factor 3 homolog                                                                    | 3  | 12 | 0  |
| 228480238 | Prpf31   | PRP31 pre-mRNA processing factor 31 isoform 1                                                                | 5  | 14 | 1  |
| 227497256 | Prpf38a  | PRP38 pre-mRNA processing factor 38 (yeast) domain containing A                                              | 0  | 2  | 5  |
| 30794464  | Prpf38b  | PRP38 pre-mRNA processing factor 38 (yeast) domain containing B                                              | 0  | 12 | 0  |
| 55925589  | Prpf4    | PRP4 pre-mRNA processing factor 4 homolog                                                                    | 0  | 22 | 5  |
| 158854005 | Prpf4b   | PRP4 pre-mRNA processing factor 4 homolog B                                                                  | 1  | 10 | 2  |
| 27597069  | Prune    | prune                                                                                                        | 2  | 0  | 1  |
| 164518895 | Gulp1    | PTB domain adaptor protein CED-6                                                                             | 1  | 0  | 0  |
| 126215545 | Pink1    | PTEN induced putative kinase 1                                                                               | 0  | 1  | 0  |
| 13384608  | Pcbd1    | pterin 4 alpha carbinolamine dehydratase/dimerization cofactor of hepatocyte nuclear factor 1 alpha (TCF1) 1 | 6  | 2  | 0  |
| 52421794  | Pcbd2    | pterin-4 alpha-carbinolamine dehydratase 2                                                                   | 1  | 0  | 0  |
| 6677971   | Ptk6     | PTK6 protein tyrosine kinase 6                                                                               | 0  | 0  | 1  |
| 30425042  | Ptk7     | PTK7 protein tyrosine kinase 7                                                                               | 2  | 0  | 0  |
| 329112534 | Ppfia2   | PTPRF interacting protein alpha 2                                                                            | 1  | 0  | 0  |
| 281371356 | Ppfibp1  | PTPRF interacting protein, binding protein 1 (liprin beta 1)                                                 | 1  | 0  | 0  |
| 66773206  | Ergic2   | PTX1 protein isoform 1                                                                                       | 1  | 0  | 0  |
| 227430386 | Pum1     | pumilio 1 isoform 1                                                                                          | 0  | 1  | 0  |
| 6679573   | Pura     | purine rich element binding protein A                                                                        | 3  | 4  | 1  |
| 6755252   | Purb     | purine rich element binding protein B                                                                        | 5  | 5  | 3  |
| 7305395   | Pnp1     | purine-nucleoside phosphorylase 1                                                                            | 1  | 0  | 0  |
| 27544935  | P2rx2    | purinergic receptor P2X2                                                                                     | 1  | 0  | 0  |
| 71043934  | D4Erd22e | putative MAPK activating protein PM20,PM21 isoform 1                                                         | 1  | 0  | 0  |
| 87116677  | Tmco1    | putative membrane protein                                                                                    | 2  | 1  | 2  |
| 27228990  | Snrnp27  | putative nucleic acid binding protein RY-1                                                                   | 0  | 4  | 0  |
| 88853588  | Cd320    | putative VLDL lipoprotein receptor precursor                                                                 | 0  | 0  | 1  |
| 30102930  | Pwp2     | PWP2 periodic tryptophan protein homolog                                                                     | 1  | 4  | 4  |
| 72535128  | Pxk      | PX domain containing serine/threonine kinase short isoform                                                   | 0  | 1  | 0  |
| 26006861  | Pdxk     | pyridoxal (pyridoxine, vitamin B6) kinase                                                                    | 1  | 0  | 0  |
| 88758584  | Pdxdc1   | pyridoxal-dependent decarboxylase domain containing 1 isoform 1                                              | 5  | 0  | 5  |
| 19527238  | Pnp0     | pyridoxine 5'-phosphate oxidase                                                                              | 0  | 0  | 1  |
| 27754065  | Ppa1     | pyrophosphatase 1                                                                                            | 1  | 0  | 0  |
| 21450149  | Pycr1    | pyrroline-5-carboxylate reductase 1                                                                          | 1  | 0  | 1  |
| 19526878  | Pycr2    | pyrroline-5-carboxylate reductase family, member 2                                                           | 16 | 25 | 26 |
| 119508439 | Pycrl    | pyrroline-5-carboxylate reductase-like                                                                       | 2  | 0  | 0  |
| 255958292 | Aldh18a1 | pyrroline-5-carboxylate synthetase isoform 1                                                                 | 20 | 23 | 7  |
| 251823980 | Pcx      | pyruvate carboxylase isoform 2                                                                               | 35 | 0  | 0  |
| 18152793  | Pdhh     | pyruvate dehydrogenase (lipoamide) beta                                                                      | 7  | 5  | 4  |

|           |               |                                                         |    |    |    |
|-----------|---------------|---------------------------------------------------------|----|----|----|
| 28201978  | Pdhx          | pyruvate dehydrogenase complex, component X             | 2  | 0  | 0  |
| 6679261   | Pdha1         | pyruvate dehydrogenase E1 alpha 1                       | 15 | 4  | 0  |
| 6679263   | Pdha2         | pyruvate dehydrogenase E1 alpha 2                       | 1  | 0  | 0  |
| 110625975 | Pdk1          | pyruvate dehydrogenase kinase 1                         | 8  | 10 | 0  |
| 226958643 | Pdk2          | pyruvate dehydrogenase kinase 2                         | 1  | 0  | 0  |
| 21704122  | Pdk3          | pyruvate dehydrogenase kinase 3                         | 2  | 6  | 0  |
| 7305375   | Pdk4          | pyruvate dehydrogenase kinase, isoenzyme 4              | 0  | 1  | 0  |
| 153792772 | Pklr          | pyruvate kinase, liver and RBC isoform 1                | 2  | 1  | 1  |
| 31981562  | Pkm2          | pyruvate kinase, muscle                                 | 38 | 5  | 14 |
| 226958440 | Qk            | quaking protein isoform 3                               | 0  | 2  | 1  |
| 21312520  | Qdpr          | quinoid dihydropteridine reductase                      | 1  | 0  | 0  |
| 33859558  | Rabac1        | Rab acceptor 1                                          | 1  | 0  | 0  |
| 254553295 | Rabggtb       | RAB geranylgeranyltransferase, beta subunit isoform 1   | 1  | 0  | 0  |
| 6679587   | Rab1          | RAB1, member RAS oncogene family                        | 7  | 3  | 4  |
| 7710086   | Rab10         | RAB10, member RAS oncogene family                       | 8  | 0  | 4  |
| 242247151 | Rab11fip3     | RAB11 family interacting protein 3 (class II) isoform 1 | 0  | 0  | 1  |
| 6679583   | Rab11b        | RAB11B, member RAS oncogene family                      | 11 | 7  | 9  |
| 28202067  | Rab11fip4     | Rab11-FIP4-like                                         | 0  | 1  | 0  |
| 18390323  | Rab14         | RAB14, member RAS oncogene family                       | 9  | 6  | 7  |
| 229577224 | Rab17         | RAB17, member RAS oncogene family                       | 1  | 0  | 0  |
| 30841008  | Rab18         | RAB18, member RAS oncogene family                       | 4  | 0  | 1  |
| 21313162  | Rab1b         | RAB1B, member RAS oncogene family                       | 4  | 0  | 3  |
| 33859751  | Rab21         | RAB21, member RAS oncogene family                       | 6  | 0  | 3  |
| 148747177 | Rab22a        | RAB22A, member RAS oncogene family                      | 1  | 0  | 1  |
| 6679591   | Rab24         | RAB24, member RAS oncogene family                       | 1  | 0  | 0  |
| 31980838  | Rab25         | RAB25, member RAS oncogene family                       | 7  | 0  | 7  |
| 13128964  | Rab27a        | RAB27A protein                                          | 1  | 1  | 0  |
| 10946940  | Rab2a         | RAB2A, member RAS oncogene family                       | 2  | 0  | 1  |
| 30525051  | Rab2b         | RAB2B protein                                           | 6  | 0  | 0  |
| 31560778  | Rab30         | RAB30, member RAS oncogene family                       | 0  | 1  | 0  |
| 13385896  | Rab32         | RAB32                                                   | 0  | 0  | 1  |
| 37718983  | Rab35         | RAB35, member RAS oncogene family                       | 0  | 2  | 8  |
| 30425356  | Rab39         | RAB39, member RAS oncogene family                       | 2  | 1  | 1  |
| 21362337  | Rab3il1       | RAB3A interacting protein (rabin3)-like 1               | 0  | 0  | 1  |
| 261862303 | Rab3a         | RAB3A, member RAS oncogene family                       | 1  | 0  | 0  |
| 12963723  | Rab3b         | RAB3B, member RAS oncogene family                       | 2  | 1  | 0  |
| 13470090  | Rab3c         | RAB3C, member RAS oncogene family                       | 1  | 0  | 0  |
| 15042957  | Rab3d         | RAB3D, member RAS oncogene family                       | 2  | 0  | 0  |
| 171184402 | Rab4a         | RAB4A, member RAS oncogene family                       | 1  | 0  | 0  |
| 13385374  | Rab5a         | RAB5A, member RAS oncogene family                       | 4  | 0  | 1  |
| 28916687  | Rab5b         | RAB5B, member RAS oncogene family isoform 2             | 7  | 2  | 4  |
| 113866024 | Rab5c         | RAB5C, member RAS oncogene family                       | 7  | 1  | 6  |
| 254750706 | Rab6          | RAB6A, member RAS oncogene family isoform 2             | 3  | 0  | 3  |
| 120300971 | Erc1          | Rab6-interacting protein 2 isoform 1                    | 0  | 3  | 1  |
| 148747526 | Rab7          | RAB7, member RAS oncogene family                        | 13 | 3  | 6  |
| 27734154  | Rab8b         | RAB8B, member RAS oncogene family                       | 2  | 1  | 1  |
| 31559945  | Rabepk        | Rab9 effector protein with kelch motifs                 | 1  | 0  | 0  |
| 9790227   | Rab9          | RAB9, member RAS oncogene family                        | 3  | 0  | 0  |
| 140970573 | Rabep2        | rabaptin, RAB GTPase binding effector protein 2         | 3  | 0  | 0  |
| 41152502  | Rph3al        | rabphilin 3A-like (without C2 domains)                  | 1  | 0  | 0  |
| 254692855 | Rad21         | RAD21 homolog                                           | 0  | 31 | 12 |
| 34447211  | Rad23a        | RAD23a homolog                                          | 2  | 0  | 1  |
| 171906578 | Rad23b        | RAD23b homolog                                          | 4  | 2  | 0  |
| 91807128  | 0610007P08Rik | RAD26L hypothetical protein isoform 1                   | 0  | 0  | 1  |

|           |          |                                                                               |    |    |    |
|-----------|----------|-------------------------------------------------------------------------------|----|----|----|
| 153945822 | Rad50    | RAD50 homolog                                                                 | 0  | 16 | 0  |
| 88319960  | Rad54b   | RAD54 homolog B                                                               | 1  | 0  | 1  |
| 6677725   | Rfng     | radical fringe                                                                | 0  | 1  | 0  |
| 157277952 | Rdx      | radixin isoform b                                                             | 17 | 24 | 3  |
| 28201956  | Rae1     | RAE1 RNA export 1 homolog                                                     | 0  | 5  | 4  |
| 110625981 | Rftn2    | raftlin family member 2                                                       | 1  | 0  | 0  |
| 229577175 | Ralgps2  | Ral-A exchange factor RalGPS2                                                 | 1  | 0  | 0  |
| 31982627  | Rgl3     | RalGDS-like protein 3                                                         | 3  | 0  | 4  |
| 153792001 | Ranbp1   | RAN binding protein 1                                                         | 4  | 2  | 1  |
| 13249349  | Ranbp17  | RAN binding protein 17                                                        | 1  | 0  | 0  |
| 153792534 | Ranbp2   | RAN binding protein 2                                                         | 3  | 35 | 18 |
| 83523744  | Ranbp3   | RAN binding protein 3                                                         | 2  | 0  | 1  |
| 53850664  | Ranbp6   | RAN binding protein 6                                                         | 0  | 1  | 0  |
| 161353515 | Ranbp9   | RAN binding protein 9                                                         | 0  | 0  | 1  |
| 226062635 | Rangap1  | RAN GTPase activating protein 1                                               | 5  | 9  | 5  |
| 6678365   | Ran      | RAN, member RAS oncogene family                                               | 7  | 8  | 7  |
| 40804757  | Ranbp10  | Ran-binding protein 10                                                        | 2  | 0  | 0  |
| 19745156  | lpo4     | RANBP4                                                                        | 3  | 1  | 2  |
| 84875506  | Rapgef1  | Rap guanine nucleotide exchange factor (GEF) 1 isoform 1                      | 1  | 0  | 0  |
| 13386338  | Rap2b    | RAP2B, member of RAS oncogene family                                          | 1  | 0  | 0  |
| 154146249 | Rptor    | raptor                                                                        | 1  | 0  | 1  |
| 21703974  | Rin1     | Ras and Rab interactor 1                                                      | 1  | 0  | 0  |
| 229091861 | Rinl     | Ras and Rab interactor-like                                                   | 0  | 1  | 0  |
| 145587080 | Raph1    | Ras association (RalGDS/AF-6) and pleckstrin homology domains 1               | 1  | 0  | 0  |
| 110431380 | Rassf6   | Ras association (RalGDS/AF-6) domain family member 6                          | 0  | 0  | 1  |
| 7242201   | Rasgrp1  | RAS guanyl releasing protein 1                                                | 1  | 0  | 0  |
| 28626508  | Rheb     | Ras homolog enriched in brain                                                 | 0  | 0  | 1  |
| 31542143  | Rhoa     | ras homolog gene family, member A                                             | 3  | 2  | 2  |
| 6680726   | Rhob     | ras homolog gene family, member B                                             | 3  | 3  | 3  |
| 160415213 | Rhoc     | ras homolog gene family, member C                                             | 3  | 4  | 7  |
| 9625037   | Rhog     | ras homolog gene family, member G                                             | 0  | 0  | 1  |
| 13489097  | Rhoj     | ras homolog gene family, member J                                             | 1  | 1  | 1  |
| 34328361  | Rhoq     | ras homolog gene family, member Q                                             | 1  | 1  | 1  |
| 22122457  | Rhot2    | ras homolog gene family, member T2                                            | 2  | 0  | 3  |
| 21704044  | Rhov     | ras homolog gene family, member V                                             | 0  | 0  | 1  |
| 61676215  | Rasip1   | Ras interacting protein 1                                                     | 0  | 0  | 1  |
| 84993718  | Rasa4    | RAS p21 protein activator 4 isoform 1                                         | 0  | 1  | 0  |
| 89111131  | Rasgrf1  | RAS protein-specific guanine nucleotide-releasing factor 1 isoform 1          | 0  | 0  | 1  |
| 33859753  | Rap1b    | RAS related protein 1b                                                        | 1  | 6  | 8  |
| 34328471  | Rala     | ras related v-ral simian leukemia viral oncogene homolog A                    | 3  | 4  | 4  |
| 295424118 | Rreb1    | ras responsive element binding protein 1 isoform 1                            | 0  | 2  | 0  |
| 31982028  | Rsu1     | Ras suppressor protein 1                                                      | 1  | 5  | 2  |
| 21311975  | Rab13    | RAS-associated protein RAB13                                                  | 1  | 2  | 3  |
| 73088862  | Rasgef1c | RasGEF domain family, member 1C                                               | 0  | 2  | 0  |
| 124248579 | G3bp2    | Ras-GTPase-activating protein (GAP120) SH3-domain binding protein 2 isoform a | 6  | 5  | 0  |
| 7305075   | G3bp1    | ras-GTPase-activating protein SH3-domain binding protein                      | 14 | 14 | 3  |
| 110625708 | Rasl11b  | RAS-like, family 11, member B                                                 | 0  | 0  | 1  |
| 45592934  | Rac1     | RAS-related C3 botulinum substrate 1                                          | 3  | 6  | 7  |
| 6679601   | Rac2     | RAS-related C3 botulinum substrate 2                                          | 1  | 4  | 5  |

|           |               |                                                                     |   |    |    |
|-----------|---------------|---------------------------------------------------------------------|---|----|----|
| 31541819  | Rraga         | Ras-related GTP binding A                                           | 1 | 0  | 0  |
| 21704066  | Rap1a         | RAS-related protein-1a                                              | 1 | 2  | 3  |
| 29789209  | Raver1        | Raver1                                                              | 0 | 8  | 13 |
| 226693374 | Rb1cc1        | RB1-inducible coiled-coil 1                                         | 1 | 0  | 0  |
| 289666776 | Rccd1         | RCC1 domain containing 1                                            | 0 | 1  | 0  |
| 33239431  | Rcc2          | RCC1-like                                                           | 0 | 19 | 0  |
| 84781800  | Rcsd1         | RCSA domain containing 1 isoform a                                  | 0 | 0  | 1  |
| 255958213 | Romo1         | reactive oxygen species modulator 1                                 | 1 | 0  | 1  |
| 124486604 | Rlf           | rearranged L-myc fusion sequence                                    | 1 | 0  | 1  |
| 31982699  | Rec8          | REC8 homolog                                                        | 1 | 0  | 0  |
| 161016826 | Reep5         | receptor accessory protein 5                                        | 5 | 0  | 0  |
| 56606144  | Rtp2          | receptor transporter protein 2                                      | 0 | 1  | 0  |
| 226060640 | Rtp3          | receptor transporter protein 3                                      | 1 | 0  | 0  |
| 224967081 | Rapsn         | receptor-associated protein of the synapse                          | 0 | 0  | 1  |
| 133778933 | Rag1          | recombination activating gene 1                                     | 1 | 0  | 0  |
| 188497726 | Rag1ap1       | recombination activating gene 1 activating protein 1                | 1 | 0  | 1  |
| 124286787 | Rbpj          | recombining binding protein suppressor of hairless isoform 1        | 0 | 9  | 0  |
| 326368226 | Recql         | RecQ protein-like                                                   | 0 | 0  | 1  |
| 18485510  | Recql5        | RecQ protein-like 5                                                 | 0 | 1  | 0  |
| 117320554 | Reln          | reelin precursor                                                    | 0 | 0  | 1  |
| 6677739   | Rgn           | regucalcin                                                          | 1 | 0  | 0  |
| 6677717   | Resp18        | regulated endocrine-specific protein 18                             | 0 | 1  | 0  |
| 60592786  | Rims1         | regulating synaptic membrane exocytosis 1 isoform 1                 | 1 | 0  | 1  |
| 34328077  | Rprd1b        | regulation of nuclear pre-mRNA domain containing 1B                 | 6 | 11 | 7  |
| 124486841 | Rprd2         | regulation of nuclear pre-mRNA domain containing 2                  | 0 | 3  | 5  |
| 19527092  | Rcc1          | regulator of chromosome condensation 1                              | 0 | 16 | 6  |
| 124486718 | Rgs11         | regulator of G-protein signaling 11                                 | 0 | 1  | 0  |
| 190684665 | Rgs16         | regulator of G-protein signaling 16                                 | 0 | 0  | 1  |
| 160948569 | Rgs3          | regulator of G-protein signaling 3 isoform 2                        | 0 | 1  | 0  |
| 40789289  | Rgs8          | regulator of G-protein signalling 8                                 | 1 | 0  | 0  |
| 170784813 | Upf1          | regulator of nonsense transcripts 1 isoform b                       | 5 | 0  | 4  |
| 115647917 | 9630025121Rik | regulator of sex-limitation candidate 16                            | 1 | 0  | 0  |
| 70980523  | Rfxank        | regulatory factor X-associated ankyrin-containing protein isoform 2 | 0 | 1  | 0  |
| 165972315 | Rras2         | related RAS viral (r-ras) oncogene homolog 2                        | 1 | 1  | 2  |
| 124486905 | Rsf1          | remodeling and spacing factor 1                                     | 1 | 1  | 7  |
| 13676837  | Ren1          | renin 1 structural                                                  | 0 | 0  | 1  |
| 257796315 | Renbp         | renin binding protein                                               | 0 | 0  | 1  |
| 112421060 | Rptn          | repetin                                                             | 1 | 0  | 0  |
| 11177922  | Rfc2          | replication factor C (activator 1) 2                                | 1 | 8  | 1  |
| 124249204 | Rfc3          | replication factor C (activator 1) 3                                | 3 | 5  | 3  |
| 21703948  | Rfc4          | replication factor C (activator 1) 4                                | 0 | 9  | 3  |
| 188219597 | Rfc1          | replication factor C 1                                              | 0 | 4  | 1  |
| 110625924 | Rfc5          | replication factor C 5                                              | 7 | 13 | 3  |
| 255982530 | Rpa1          | replication protein A1                                              | 5 | 1  | 0  |
| 110625961 | Rpa2          | replication protein A2                                              | 3 | 1  | 1  |
| 13386122  | Rpa3          | replication protein A3                                              | 3 | 2  | 0  |
| 157042794 | Rhox7         | reproductive homeobox 7                                             | 1 | 0  | 0  |
| 13385882  | Rer1          | RER1 homolog                                                        | 0 | 0  | 1  |
| 39930559  | Rcor1         | REST corepressor 1                                                  | 0 | 9  | 1  |
| 57634523  | Rcor3         | REST corepressor 3                                                  | 0 | 2  | 1  |
| 23821025  | Clip1         | restin                                                              | 0 | 4  | 1  |
| 124256487 | Ret           | ret proto-oncogene isoform a                                        | 0 | 0  | 1  |

|           |          |                                                                                  |    |    |    |
|-----------|----------|----------------------------------------------------------------------------------|----|----|----|
| 114205428 | Rcn2     | reticulocalbin 2                                                                 | 4  | 0  | 0  |
| 56090141  | Rtn1     | reticulon 1 isoform RTN1-C                                                       | 1  | 0  | 1  |
| 54607016  | Rtn3     | reticulon 3 isoform 4                                                            | 4  | 2  | 3  |
| 31543608  | Rtn4ip1  | reticulon 4 interacting protein 1                                                | 2  | 0  | 0  |
| 34610241  | Rtn4     | reticulon 4 isoform D                                                            | 16 | 0  | 0  |
| 307548909 | Rp1      | retinitis pigmentosa 1                                                           | 0  | 1  | 0  |
| 27881421  | Rp11     | retinitis pigmentosa 1 homolog (human)-like 1                                    | 1  | 0  | 1  |
| 19526820  | Rp2h     | retinitis pigmentosa 2 homolog                                                   | 0  | 0  | 1  |
| 37694072  | Arid4b   | retinoblastoma binding protein 1-like 1 isoform 1                                | 0  | 2  | 0  |
| 47059484  | Rbbp4    | retinoblastoma binding protein 4                                                 | 3  | 18 | 10 |
| 164450487 | Rbbp5    | retinoblastoma binding protein 5                                                 | 0  | 12 | 0  |
| 163937858 | Rbbp6    | retinoblastoma binding protein 6 isoform 1                                       | 0  | 1  | 1  |
| 157909799 | Rbbp7    | retinoblastoma binding protein 7                                                 | 3  | 12 | 4  |
| 237820660 | Zubr1    | retinoblastoma-associated factor 600 isoform 1                                   | 11 | 1  | 0  |
| 168823452 | D14Abb1e | retinoblastoma-associated protein 140 isoform 1                                  | 0  | 1  | 1  |
| 124487105 | Arid4a   | retinoblastoma-binding protein 1                                                 | 0  | 3  | 0  |
| 213417872 | Rbl1     | retinoblastoma-like protein 1 isoform 1                                          | 0  | 1  | 2  |
| 257196165 | Rai16    | retinoic acid induced 16                                                         | 0  | 1  | 0  |
| 6755384   | Rxra     | retinoid X receptor alpha                                                        | 1  | 1  | 0  |
| 25141231  | Rdh10    | retinol dehydrogenase 10                                                         | 0  | 0  | 1  |
| 19482172  | Rdh11    | retinol dehydrogenase 11                                                         | 4  | 0  | 1  |
| 30425078  | Rdh13    | retinol dehydrogenase 13                                                         | 1  | 0  | 4  |
| 46309585  | Rtl1     | retrotransposon-like 1                                                           | 1  | 0  | 0  |
| 40254551  | Rev1     | REV1-like                                                                        | 0  | 0  | 1  |
| 87299621  | Rft1     | RFT1 homolog                                                                     | 1  | 0  | 0  |
| 85701822  | Rltpr    | RGD motif, leucine rich repeats, tropomodulin domain and proline-rich containing | 0  | 1  | 0  |
| 229092834 | Rhcg     | Rhesus blood group-associated C glycoprotein                                     | 0  | 0  | 1  |
| 13386354  | Rnd3     | Rho family GTPase 3                                                              | 1  | 0  | 0  |
| 31982030  | Arhgdia  | Rho GDP dissociation inhibitor (GDI) alpha                                       | 9  | 2  | 3  |
| 225543420 | Arhgap1  | Rho GTPase activating protein 1 isoform 2                                        | 5  | 0  | 3  |
| 116174786 | Arhgap10 | Rho GTPase activating protein 10                                                 | 0  | 1  | 0  |
| 254750666 | Arhgap19 | Rho GTPase activating protein 19 isoform 1                                       | 0  | 1  | 0  |
| 203097667 | Arhgap21 | Rho GTPase activating protein 21 isoform 1                                       | 0  | 0  | 1  |
| 83582813  | Arhgap25 | Rho GTPase activating protein 25 isoform a                                       | 1  | 0  | 0  |
| 87159826  | Arhgap26 | Rho GTPase activating protein 26                                                 | 1  | 0  | 0  |
| 33563303  | Arhgap29 | Rho GTPase activating protein 29                                                 | 1  | 0  | 0  |
| 86262151  | Arhgap5  | Rho GTPase activating protein 5                                                  | 0  | 1  | 0  |
| 87252731  | Arhgap6  | Rho GTPase activating protein 6 isoform a                                        | 2  | 0  | 0  |
| 194306553 | Arhgef1  | Rho guanine nucleotide exchange factor (GEF) 1 isoform a                         | 0  | 0  | 1  |
| 51491850  | Arhgef11 | Rho guanine nucleotide exchange factor (GEF) 11                                  | 0  | 0  | 2  |
| 163838664 | Arhgef16 | Rho guanine nucleotide exchange factor (GEF) 16                                  | 0  | 2  | 0  |
| 124487439 | Arhgef17 | Rho guanine nucleotide exchange factor (GEF) 17                                  | 0  | 0  | 1  |
| 33563236  | Arhgdib  | Rho, GDP dissociation inhibitor (GDI) beta                                       | 6  | 0  | 0  |
| 312032462 | Arhgef2  | rho/rac guanine nucleotide exchange factor (GEF) 2                               | 2  | 0  | 1  |
| 134949013 | Rock2    | Rho-associated coiled-coil forming kinase 2                                      | 0  | 14 | 0  |
| 6677759   | Rock1    | Rho-associated, coiled-coil containing protein kinase 1                          | 0  | 0  | 1  |
| 170014732 | Rhbdd1   | rhomboid domain containing 1                                                     | 1  | 0  | 0  |
| 21450189  | Rhbdl1   | rhomboid protease 1                                                              | 0  | 1  | 0  |
| 229092577 | Rhpn2    | rhophilin, Rho GTPase binding protein 2                                          | 1  | 0  | 0  |
| 209977095 | Rtkn     | rhotekin isoform b                                                               | 1  | 0  | 1  |
| 58037097  | Rnaseh2b | ribonuclease H2, subunit B                                                       | 0  | 1  | 0  |
| 194328670 | Rnasen   | ribonuclease III, nuclear                                                        | 0  | 1  | 0  |

|           |          |                                                          |    |    |    |
|-----------|----------|----------------------------------------------------------|----|----|----|
| 13385432  | Rpp14    | ribonuclease P 14kDa subunit                             | 1  | 4  | 0  |
| 257196209 | Rpp30    | ribonuclease P/MRP 30kDa subunit                         | 1  | 6  | 0  |
| 145279200 | Rnaset2a | ribonuclease T2A                                         | 4  | 0  | 0  |
| 285402659 | Rnh1     | ribonuclease/angiogenin inhibitor 1                      | 1  | 0  | 0  |
| 121674793 | Rnps1    | ribonucleic acid binding protein S1 isoform 2            | 0  | 2  | 4  |
| 282398108 | Rpn1     | ribophorin I                                             | 31 | 2  | 14 |
| 34996495  | Rpn2     | ribophorin II                                            | 19 | 2  | 17 |
| 30794470  | Rsl1d1   | ribosomal L1 domain containing 1                         | 1  | 6  | 14 |
| 134254429 | Rimklb   | ribosomal modification protein rimK-like family member B | 0  | 0  | 1  |
| 16418339  | Rpl10    | ribosomal protein 10                                     | 8  | 2  | 9  |
| 255003735 | Rpl10a   | ribosomal protein L10A                                   | 10 | 2  | 7  |
| 13385408  | Rpl11    | ribosomal protein L11                                    | 4  | 8  | 5  |
| 160333553 | Rpl12    | ribosomal protein L12                                    | 2  | 6  | 6  |
| 33186863  | Rpl13    | ribosomal protein L13                                    | 5  | 1  | 4  |
| 31981945  | Rpl13a   | ribosomal protein L13A                                   | 4  | 1  | 5  |
| 13385472  | Rpl14    | ribosomal protein L14                                    | 1  | 1  | 5  |
| 13385036  | Rpl15    | ribosomal protein L15                                    | 3  | 4  | 9  |
| 161484662 | Rpl17    | ribosomal protein L17                                    | 4  | 2  | 6  |
| 83699424  | Rpl18    | ribosomal protein L18                                    | 7  | 6  | 7  |
| 58037465  | Rpl18a   | ribosomal protein L18A                                   | 1  | 0  | 1  |
| 162287138 | Gm15427  | ribosomal protein L18A family member                     | 7  | 3  | 5  |
| 226958653 | Rpl19    | ribosomal protein L19 isoform 1                          | 3  | 1  | 3  |
| 198442865 | Gm6813   | ribosomal protein L21 family member                      | 1  | 0  | 1  |
| 6677775   | Rpl22    | ribosomal protein L22                                    | 1  | 4  | 3  |
| 13386010  | Rpl2211  | ribosomal protein L22 like 1                             | 1  | 3  | 2  |
| 12584986  | Rpl23    | ribosomal protein L23                                    | 1  | 3  | 3  |
| 46430508  | Rpl23a   | ribosomal protein L23a                                   | 7  | 9  | 8  |
| 18250296  | Rpl24    | ribosomal protein L24                                    | 5  | 3  | 6  |
| 38348464  | BC003885 | ribosomal protein L24-like                               | 0  | 0  | 1  |
| 6677777   | Rpl26    | ribosomal protein L26                                    | 5  | 4  | 5  |
| 8567400   | Rpl27    | ribosomal protein L27                                    | 2  | 7  | 6  |
| 31560517  | Rpl27a   | ribosomal protein L27a                                   | 4  | 1  | 4  |
| 6677779   | Rpl28    | ribosomal protein L28                                    | 4  | 1  | 4  |
| 6677781   | Rpl29    | ribosomal protein L29                                    | 3  | 0  | 1  |
| 255308899 | Rpl3     | ribosomal protein L3                                     | 3  | 4  | 5  |
| 254553337 | Rpl30    | ribosomal protein L30                                    | 3  | 5  | 4  |
| 16716589  | Rpl31    | ribosomal protein L31                                    | 3  | 4  | 2  |
| 25742730  | Rpl32    | ribosomal protein L32                                    | 1  | 0  | 2  |
| 55742885  | Rpl34    | ribosomal protein L34 isoform 2                          | 5  | 1  | 2  |
| 13385044  | Rpl35    | ribosomal protein L35                                    | 1  | 1  | 2  |
| 194440715 | Rpl35a   | ribosomal protein L35a                                   | 4  | 1  | 1  |
| 160333837 | Rpl36    | ribosomal protein L36                                    | 4  | 0  | 3  |
| 13385038  | Rpl36al  | ribosomal protein L36A-like                              | 1  | 1  | 1  |
| 6677785   | Rpl37a   | ribosomal protein L37a                                   | 1  | 2  | 2  |
| 114205444 | Rpl38    | ribosomal protein L38                                    | 5  | 5  | 3  |
| 13385552  | Rpl39    | ribosomal protein L39                                    | 1  | 0  | 0  |
| 30794450  | Rpl4     | ribosomal protein L4                                     | 19 | 0  | 13 |
| 23956082  | Rpl5     | ribosomal protein L5                                     | 2  | 9  | 4  |
| 84662736  | Rpl6     | ribosomal protein L6                                     | 1  | 1  | 10 |
| 31981515  | Rpl7     | ribosomal protein L7                                     | 6  | 4  | 13 |
| 7305443   | Rpl7a    | ribosomal protein L7A                                    | 1  | 2  | 13 |
| 27754134  | Rpl711   | ribosomal protein L7-like 1                              | 0  | 0  | 4  |
| 6755358   | Rpl8     | ribosomal protein L8                                     | 6  | 2  | 4  |
| 14149647  | Rpl9     | ribosomal protein L9                                     | 1  | 10 | 7  |



|           |               |                                                |    |    |    |
|-----------|---------------|------------------------------------------------|----|----|----|
| 13399310  | Rps10         | ribosomal protein S10                          | 6  | 9  | 3  |
| 21426889  | Rps11         | ribosomal protein S11                          | 4  | 6  | 9  |
| 40254577  | Rps12         | ribosomal protein S12                          | 1  | 7  | 0  |
| 13386034  | Rps13         | ribosomal protein S13                          | 5  | 3  | 4  |
| 31981100  | Rps14         | ribosomal protein S14                          | 5  | 7  | 4  |
| 6677799   | Rps15         | ribosomal protein S15                          | 2  | 1  | 2  |
| 24762230  | Rps15a        | ribosomal protein S15A                         | 3  | 6  | 6  |
| 158966704 | Rps16         | ribosomal protein S16                          | 8  | 6  | 7  |
| 6677801   | Rps17         | ribosomal protein S17                          | 5  | 5  | 4  |
| 6755368   | Rps18         | ribosomal protein S18                          | 7  | 7  | 8  |
| 12963511  | Rps19         | ribosomal protein S19                          | 1  | 7  | 1  |
| 18087805  | Rps2          | ribosomal protein S2                           | 4  | 6  | 10 |
| 13385652  | Rps20         | ribosomal protein S20                          | 2  | 4  | 1  |
| 21536222  | Rps21         | ribosomal protein S21                          | 4  | 2  | 0  |
| 46519160  | Rps24         | ribosomal protein S24 isoform 2                | 3  | 2  | 4  |
| 28372479  | Rps25         | ribosomal protein S25                          | 5  | 5  | 3  |
| 26024336  | Rps27         | ribosomal protein S27                          | 3  | 3  | 2  |
| 76443694  | Rps27a        | ribosomal protein S27a                         | 1  | 0  | 1  |
| 13385958  | Rps27l        | ribosomal protein S27-like                     | 2  | 3  | 2  |
| 21426821  | Rps28         | ribosomal protein S28                          | 3  | 2  | 0  |
| 6677803   | Rps29         | ribosomal protein S29                          | 2  | 1  | 1  |
| 6755372   | Rps3          | ribosomal protein S3                           | 16 | 14 | 13 |
| 254553321 | Rps3a         | ribosomal protein S3A                          | 15 | 13 | 8  |
| 6677805   | Rps4x         | ribosomal protein S4, X-linked                 | 5  | 1  | 3  |
| 254675270 | Rps5          | ribosomal protein S5                           | 4  | 8  | 6  |
| 6677809   | Rps6          | ribosomal protein S6                           | 4  | 2  | 6  |
| 158636007 | Rps6ka1       | ribosomal protein S6 kinase polypeptide 1      | 1  | 0  | 0  |
| 9910454   | Rps6ka4       | ribosomal protein S6 kinase, polypeptide 4     | 0  | 0  | 1  |
| 23956386  | Rps6ka5       | ribosomal protein S6 kinase, polypeptide 5     | 1  | 0  | 0  |
| 6755376   | Rps7          | ribosomal protein S7                           | 6  | 8  | 7  |
| 6677813   | Rps8          | ribosomal protein S8                           | 10 | 3  | 9  |
| 33504483  | Rps9          | ribosomal protein S9-like                      | 13 | 6  | 12 |
| 224994260 | Rpsa          | ribosomal protein SA                           | 10 | 4  | 3  |
| 83745120  | Rplp2         | ribosomal protein, large P2                    | 6  | 6  | 5  |
| 6671569   | Rplp0         | ribosomal protein, large, P0                   | 2  | 6  | 11 |
| 9256519   | Rplp1         | ribosomal protein, large, P1                   | 1  | 3  | 2  |
| 13384904  | Mrps22        | ribosomal protein, mitochondrial, S22          | 5  | 0  | 0  |
| 254911009 | Rrp1b         | ribosomal RNA processing 1 homolog B isoform 1 | 0  | 2  | 2  |
| 40789092  | Rrp12         | ribosomal RNA processing 12 homolog            | 0  | 1  | 12 |
| 257467556 | Rrp7a         | ribosomal RNA processing 7 homolog A           | 0  | 4  | 1  |
| 124486712 | Rrbp1         | ribosome binding protein 1 isoform a           | 8  | 15 | 0  |
| 145864471 | Myh7b         | RIKEN cDNA 0610038P03                          | 0  | 0  | 1  |
| 62530188  | Ahsa2         | RIKEN cDNA 1110064P04                          | 0  | 1  | 0  |
| 295789144 | 1700003M02Rik | RIKEN cDNA 1700003M02                          | 1  | 0  | 0  |
| 21313668  | 2310001A20Rik | RIKEN cDNA 2310001A20                          | 9  | 0  | 0  |
| 58037443  | 2310003C23Rik | RIKEN cDNA 2310003C23                          | 1  | 0  | 0  |
| 226342951 | 2310044H10Rik | RIKEN cDNA 2310044H10                          | 1  | 0  | 0  |
| 145207992 | Dis3          | RIKEN cDNA 2810028N01                          | 0  | 5  | 0  |
| 19526956  | 2900064A13Rik | RIKEN cDNA 2900064A13                          | 2  | 0  | 2  |
| 61742810  | Zc3h13        | RIKEN cDNA 3110050K21                          | 0  | 1  | 0  |
| 168480120 | Rictor        | RIKEN cDNA 4921505C17                          | 2  | 0  | 0  |

|           |               |                                                           |   |    |    |
|-----------|---------------|-----------------------------------------------------------|---|----|----|
| 281427155 | 4930458L03Rik | RIKEN cDNA 4930458L03                                     | 1 | 0  | 0  |
| 262263417 | Fam117a       | RIKEN cDNA 5730593F17                                     | 1 | 0  | 0  |
| 110665744 | Tnip3         | RIKEN cDNA 9030611K07                                     | 1 | 0  | 0  |
| 27369505  | Ktelc1        | RIKEN cDNA 9630046K23                                     | 1 | 2  | 0  |
| 54020730  | Efr3a         | RIKEN cDNA C920006C10                                     | 1 | 1  | 2  |
| 191252808 | Rimbp3        | RIMS binding protein 3                                    | 0 | 1  | 0  |
| 26024211  | Rfwd2         | ring finger and WD repeat domain 2                        | 0 | 0  | 1  |
| 21311909  | Rnf6          | ring finger protein (C3H2C3 type) 6                       | 1 | 0  | 0  |
| 226958428 | Ring1         | ring finger protein 1                                     | 0 | 6  | 0  |
| 187960114 | Rnf103        | ring finger protein 103                                   | 0 | 0  | 1  |
| 247301241 | Msl21         | ring finger protein 184                                   | 0 | 1  | 0  |
| 256225924 | Rnf187        | ring finger protein 187                                   | 1 | 0  | 1  |
| 33563274  | Rnf2          | ring finger protein 2                                     | 0 | 6  | 1  |
| 253795509 | Rnf20         | ring finger protein 20                                    | 0 | 5  | 0  |
| 240849649 | Rnf207        | ring finger protein 207                                   | 0 | 0  | 1  |
| 30519929  | Rnf24         | ring finger protein 24                                    | 0 | 1  | 0  |
| 167830481 | Rnf43         | ring finger protein 43                                    | 1 | 0  | 0  |
| 38348308  | Rybp          | RING1 and YY1 binding protein                             | 0 | 4  | 0  |
| 110625737 | Riok3         | RIO kinase 3                                              | 1 | 0  | 0  |
| 13385938  | Rnmt          | RNA (guanine-7-) methyltransferase                        | 0 | 3  | 0  |
| 21312876  | Rg9mtd1       | RNA (guanine-9-) methyltransferase domain containing 1    | 0 | 1  | 0  |
| 148238335 | Refbp2        | RNA and export factor binding protein 2                   | 1 | 0  | 0  |
| 269847199 | Rbm10         | RNA binding motif protein 10                              | 0 | 3  | 7  |
| 114155125 | Rbm12         | RNA binding motif protein 12                              | 2 | 0  | 0  |
| 172088112 | Rbm12b        | RNA binding motif protein 12B                             | 0 | 0  | 1  |
| 86262142  | Rbm14         | RNA binding motif protein 14                              | 1 | 13 | 19 |
| 124249066 | Rbm15         | RNA binding motif protein 15                              | 0 | 5  | 2  |
| 22779924  | Rbm17         | RNA binding motif protein 17                              | 0 | 0  | 2  |
| 30794154  | Rbm19         | RNA binding motif protein 19                              | 0 | 1  | 5  |
| 110625591 | Rbm22         | RNA binding motif protein 22                              | 0 | 1  | 4  |
| 161353449 | Rbm25         | RNA binding motif protein 25                              | 3 | 25 | 9  |
| 123701991 | Rbm26         | RNA binding motif protein 26                              | 0 | 7  | 0  |
| 166235127 | Rbm28         | RNA binding motif protein 28                              | 0 | 0  | 9  |
| 261862342 | Rbm3          | RNA binding motif protein 3                               | 4 | 7  | 5  |
| 165972311 | Esrp1         | RNA binding motif protein 35A                             | 1 | 2  | 1  |
| 118403314 | Rbm39         | RNA binding motif protein 39                              | 5 | 10 | 7  |
| 224922828 | Rbm42         | RNA binding motif protein 42                              | 1 | 5  | 0  |
| 85701905  | Rbm44         | RNA binding motif protein 44                              | 0 | 1  | 0  |
| 188497701 | Rbm47         | RNA binding motif protein 47                              | 3 | 20 | 2  |
| 22507333  | Rbm5          | RNA binding motif protein 5                               | 0 | 6  | 8  |
| 27753952  | Rbm7          | RNA binding motif protein 7                               | 0 | 2  | 1  |
| 162287294 | Rbm8a         | RNA binding motif protein 8a isoform b                    | 1 | 7  | 8  |
| 161016816 | Rbm9          | RNA binding motif protein 9 isoform 1                     | 1 | 0  | 1  |
| 83699420  | Rbmxt         | RNA binding motif protein, X chromosome retrogene         | 0 | 2  | 5  |
| 262231769 | Rbmx          | RNA binding motif protein, X-linked                       | 5 | 7  | 10 |
| 27734072  | Rbmx2         | RNA binding motif protein, X-linked 2                     | 0 | 0  | 1  |
| 65301143  | Rbmxl2        | RNA binding motif protein, X-linked-like 2                | 1 | 0  | 0  |
| 111185961 | Rbpms         | RNA binding protein gene with multiple splicing isoform 1 | 2 | 7  | 3  |
| 166197675 | Rnmtl1        | RNA methyltransferase like 1                              | 1 | 0  | 0  |
| 119226251 | Polr1c        | RNA polymerase 1-1                                        | 0 | 2  | 0  |
| 12328816  | Polr1e        | RNA polymerase I associated factor 53                     | 0 | 4  | 0  |
| 224967092 | Polr1b        | RNA polymerase I polypeptide B                            | 0 | 2  | 0  |

|           |               |                                                          |    |    |    |
|-----------|---------------|----------------------------------------------------------|----|----|----|
| 6755364   | Sub1          | RNA polymerase II transcriptional coactivator            | 1  | 5  | 1  |
| 10946950  | Rcl1          | RNA terminal phosphate cyclase-like 1                    | 0  | 3  | 3  |
| 84662758  | Rnpc3         | RNA-binding region (RNP1, RRM) containing 3              | 1  | 1  | 1  |
| 13752573  | Robld3        | roadblock domain-containing protein 3                    | 4  | 0  | 0  |
| 30039680  | Rod1          | ROD1 regulator of differentiation 1 isoform 1            | 2  | 12 | 7  |
| 37704389  | Rttm          | rotatin                                                  | 1  | 0  | 0  |
| 70794811  | Src           | Rous sarcoma oncogene isoform 1                          | 0  | 3  | 2  |
| 227908779 | Rrs1          | RRS1 ribosome biogenesis regulator homolog               | 0  | 0  | 3  |
| 21312036  | Rufy3         | RUN and FYVE domain containing 3                         | 1  | 0  | 0  |
| 7949125   | Rundc3a       | RUN domain containing 3A                                 | 1  | 0  | 0  |
| 225690526 | Runx2         | runt related transcription factor 2 isoform type II      | 0  | 1  | 1  |
| 9790083   | Ruvbl1        | RuvB-like protein 1                                      | 7  | 13 | 11 |
| 6755382   | Ruvbl2        | RuvB-like protein 2                                      | 9  | 21 | 9  |
| 145046267 | Ryr1          | ryanodine receptor 1, skeletal muscle                    | 0  | 1  | 0  |
| 124486797 | Scaper        | S phase cyclin A-associated protein in the ER            | 1  | 0  | 1  |
| 226443099 | Srbd1         | S1 RNA binding domain 1                                  | 0  | 6  | 0  |
| 6677833   | S100a10       | S100 calcium binding protein A10                         | 2  | 1  | 0  |
| 21886811  | S100a11       | S100 calcium binding protein A11 (calizzarin)            | 3  | 0  | 2  |
| 6677835   | S100a13       | S100 calcium binding protein A13                         | 1  | 1  | 0  |
| 254587910 | S100a14       | S100 calcium binding protein A14 isoform a               | 1  | 3  | 4  |
| 21312760  | S100a16       | S100 calcium binding protein A16                         | 2  | 3  | 6  |
| 6755392   | S100a6        | S100 calcium binding protein A6 (calcyclin)              | 3  | 2  | 2  |
| 30424711  | Rps19bp1      | S19 binding protein                                      | 1  | 2  | 1  |
| 13507622  | Sacm1l        | SAC1 (supressor of actin mutations 1, homolog)-like      | 7  | 0  | 0  |
| 119508435 | Sac3d1        | SAC3 domain containing 1                                 | 0  | 1  | 0  |
| 257153336 | Nip7          | Saccharomyces cerevisiae Nip7p homolog                   | 0  | 9  | 3  |
| 262263372 | Ahcy          | S-adenosylhomocysteine hydrolase                         | 6  | 0  | 0  |
| 283837832 | Ahcy2         | S-adenosylhomocysteine hydrolase-like 2                  | 1  | 1  | 0  |
| 21311907  | Sash3         | SAM and SH3 domain containing 3                          | 0  | 0  | 1  |
| 213418079 | Samhd1        | SAM domain- and HD domain-containing protein 1 isoform 1 | 4  | 6  | 1  |
| 124487193 | Sap30l        | SAP30-like                                               | 0  | 1  | 0  |
| 255918184 | Saps3         | SAPS domain family, member 3                             | 1  | 0  | 1  |
| 21703344  | Sar1a         | SAR1a gene homolog                                       | 2  | 0  | 2  |
| 21313476  | Sar1b         | SAR1a gene homolog 2                                     | 3  | 0  | 5  |
| 194328794 | Sgce          | sarcoglycan, epsilon isoform 1                           | 0  | 1  | 0  |
| 56605992  | Simap         | sarcolemma associated protein                            | 2  | 1  | 0  |
| 38259206  | Ckmt2         | sarcomeric mitochondrial creatine kinase                 | 1  | 2  | 1  |
| 20149748  | Sardh         | sarcosine dehydrogenase                                  | 2  | 0  | 1  |
| 153945866 | Safb2         | scaffold attachment factor B2                            | 0  | 13 | 12 |
| 134053873 | Scand3        | SCAN domain containing 3                                 | 1  | 3  | 0  |
| 6680878   | Scarb2        | scavenger receptor class B, member 2                     | 5  | 0  | 0  |
| 30425310  | 5830411N06Rik | scavenger receptor protein family member isoform 1       | 0  | 0  | 1  |
| 6755570   | Slfn2         | schlafen 2                                               | 0  | 1  | 0  |
| 6755572   | Slfn3         | schlafen 3                                               | 1  | 0  | 0  |
| 238637283 | Slfn5         | schlafen 5                                               | 0  | 0  | 1  |
| 70909345  | Scel          | sciellin                                                 | 1  | 1  | 1  |
| 226246552 | Scin          | scinderin isoform 1                                      | 19 | 17 | 15 |
| 238550155 | Sost          | sclerostin                                               | 0  | 0  | 1  |
| 262118314 | Sfmbt1        | Scm-like with four mbt domains 1                         | 0  | 1  | 0  |
| 90991710  | Sco1          | SCO cytochrome oxidase deficient homolog 1               | 1  | 0  | 1  |
| 162329549 | Sco2          | SCO cytochrome oxidase deficient homolog 2               | 2  | 0  | 1  |
| 6677877   | Scrg1         | scrapie responsive gene 1                                | 1  | 0  | 0  |
| 58037481  | Scfd1         | Sec1 family domain containing 1                          | 17 | 1  | 5  |

|           |               |                                                                                            |    |    |   |
|-----------|---------------|--------------------------------------------------------------------------------------------|----|----|---|
| 167900448 | Scfd2         | sec1 family domain containing 2 isoform a                                                  | 1  | 0  | 0 |
| 9910550   | Sec11a        | Sec11-like 1                                                                               | 3  | 1  | 2 |
| 29150272  | Sec13         | SEC13-like 1                                                                               | 0  | 6  | 1 |
| 84875515  | Seh1l         | sec13-like protein isoform a                                                               | 0  | 7  | 2 |
| 30425210  | Sestd1        | SEC14 and spectrin domains 1                                                               | 1  | 0  | 1 |
| 189181692 | Sec14i5       | SEC14-like 5                                                                               | 1  | 0  | 0 |
| 124378050 | Sec16a        | SEC16 homolog A                                                                            | 3  | 0  | 0 |
| 6755448   | Sec22b        | SEC22 vesicle trafficking protein-like 1                                                   | 8  | 1  | 8 |
| 254692911 | Sec23ip       | Sec23 interacting protein                                                                  | 0  | 1  | 0 |
| 67906177  | Sec23a        | SEC23A                                                                                     | 2  | 0  | 0 |
| 31980969  | Sec23b        | SEC23B                                                                                     | 1  | 0  | 0 |
| 116174774 | Sec24a        | SEC24 related gene family, member A                                                        | 1  | 0  | 0 |
| 46402179  | Sec24b        | Sec24 related gene family, member B                                                        | 1  | 0  | 0 |
| 269954700 | Sec24c        | Sec24 related gene family, member C                                                        | 5  | 0  | 0 |
| 244791271 | Sec31a        | SEC31-like 1                                                                               | 3  | 0  | 1 |
| 8394252   | Sec61a1       | Sec61 alpha subunit homolog                                                                | 5  | 1  | 3 |
| 13324684  | Sec61b        | Sec61 beta subunit                                                                         | 3  | 2  | 1 |
| 10946604  | Sec61a2       | Sec61, alpha subunit 2                                                                     | 4  | 0  | 3 |
| 158517836 | Sec61g        | SEC61, gamma subunit isoform 1                                                             | 1  | 0  | 0 |
| 158937300 | Sec63         | SEC63-like protein                                                                         | 1  | 0  | 0 |
| 114145548 | Sectm1b       | secreted and transmembrane 1B                                                              | 0  | 0  | 1 |
| 7305093   | Sergef        | secretion regulating guanine nucleotide exchange factor                                    | 0  | 0  | 1 |
| 258645100 | Scg3          | secretogranin III                                                                          | 1  | 0  | 0 |
| 58037395  | Scamp1        | secretory carrier membrane protein 1                                                       | 2  | 0  | 0 |
| 118601011 | Scamp3        | secretory carrier membrane protein 3                                                       | 4  | 0  | 0 |
| 84875513  | Sel1l         | Sel1 (suppressor of lin-12) 1 homolog isoform a                                            | 7  | 0  | 0 |
| 85701796  | Sel1l2        | sel-1 suppressor of lin-12-like 2                                                          | 1  | 0  | 0 |
| 22164798  | Selenbp1      | selenium binding protein 1                                                                 | 6  | 0  | 0 |
| 9507079   | Selenbp2      | selenium binding protein 2                                                                 | 19 | 0  | 1 |
| 27804323  | Scly          | selenocysteine lyase                                                                       | 1  | 0  | 0 |
| 156713463 | Sephs1        | selenophosphate synthetase 1                                                               | 0  | 2  | 0 |
| 82546883  | 2700094K13Rik | selenoprotein H                                                                            | 1  | 8  | 0 |
| 111119001 | Selk          | selenoprotein K                                                                            | 1  | 0  | 0 |
| 143770878 | 2810407C02Rik | selenoprotein T                                                                            | 1  | 0  | 0 |
| 31543683  | Sema3f        | sema domain, immunoglobulin domain (Ig), short basic domain, secreted, (semaphorin) 3F     | 0  | 1  | 1 |
| 84794605  | Sema3g        | sema domain, immunoglobulin domain (Ig), short basic domain, secreted, (semaphorin) 3G     | 0  | 0  | 1 |
| 164698456 | Sema4f        | sema domain, immunoglobulin domain (Ig), TM domain, and short cytoplasmic domain isoform a | 0  | 1  | 0 |
| 110625636 | Sema4b        | semaphorin 4B precursor                                                                    | 0  | 0  | 1 |
| 49274623  | Sema4d        | semaphorin 4D                                                                              | 0  | 0  | 1 |
| 119226253 | Sema5a        | semaphorin 5A                                                                              | 1  | 0  | 0 |
| 160333789 | Spr           | sepiapterin reductase                                                                      | 6  | 0  | 0 |
| 226442740 | Sept10        | septin 10 isoform 2                                                                        | 0  | 4  | 1 |
| 57634518  | Sept11        | septin 11                                                                                  | 1  | 17 | 0 |
| 321267579 | Sept12        | septin 12                                                                                  | 1  | 0  | 0 |
| 228480255 | Sept2         | septin 2 a                                                                                 | 4  | 13 | 0 |
| 117606375 | Sept3         | septin 3                                                                                   | 0  | 1  | 0 |
| 6755120   | Sept4         | septin 4                                                                                   | 0  | 6  | 0 |
| 158508501 | Sept5         | septin 5                                                                                   | 0  | 6  | 0 |
| 39930477  | Sept8         | septin 8                                                                                   | 0  | 8  | 0 |
| 164698483 | Sept9         | septin 9 isoform b                                                                         | 2  | 21 | 0 |

|           |           |                                                                                     |    |    |   |
|-----------|-----------|-------------------------------------------------------------------------------------|----|----|---|
| 6754954   | Sqstm1    | sequestosome 1                                                                      | 1  | 0  | 1 |
| 267844860 | Serpina3a | serine (or cysteine) proteinase inhibitor, clade A, member 3A isoform 1             | 0  | 0  | 1 |
| 148747546 | Serpina3k | serine (or cysteine) proteinase inhibitor, clade A, member 3K                       | 0  | 1  | 0 |
| 269973919 | Serpina5  | serine (or cysteine) proteinase inhibitor, clade A, member 5                        | 0  | 0  | 1 |
| 237757332 | Serpina10 | serine (or cysteine) proteinase inhibitor, clade B (ovalbumin), member 10 isoform 1 | 0  | 0  | 1 |
| 41235787  | Serpina3d | serine (or cysteine) proteinase inhibitor, clade b, member 3d                       | 0  | 1  | 0 |
| 255759943 | Serpina6a | serine (or cysteine) proteinase inhibitor, clade B, member 6a                       | 7  | 0  | 0 |
| 229094614 | Serpina8  | serine (or cysteine) proteinase inhibitor, clade B, member 8 isoform 1              | 0  | 0  | 1 |
| 6678101   | Serpina9  | serine (or cysteine) proteinase inhibitor, clade B, member 9                        | 2  | 0  | 0 |
| 161377465 | Serpind1  | serine (or cysteine) proteinase inhibitor, clade D, member 1 precursor              | 1  | 0  | 1 |
| 6678099   | Serpine2  | serine (or cysteine) proteinase inhibitor, clade E, member 2                        | 0  | 1  | 0 |
| 161353502 | Serpinh1  | serine (or cysteine) proteinase inhibitor, clade H, member 1                        | 2  | 1  | 3 |
| 253970508 | Scpep1    | serine carboxypeptidase 1                                                           | 7  | 0  | 0 |
| 13443008  | Serhl     | serine hydrolase protein                                                            | 3  | 0  | 1 |
| 21312298  | Shmt2     | serine hydroxymethyltransferase 2 (mitochondrial)                                   | 21 | 14 | 5 |
| 29244577  | Sptlc1    | serine palmitoyltransferase subunit 1                                               | 2  | 0  | 0 |
| 6755656   | Sptlc2    | serine palmitoyltransferase, long chain base subunit 2                              | 3  | 1  | 0 |
| 127139427 | Spint2    | serine protease inhibitor, Kunitz type 2 isoform b                                  | 0  | 0  | 1 |
| 194440687 | Srrm1     | serine/arginine repetitive matrix 1 isoform 1                                       | 1  | 2  | 0 |
| 126157504 | Srrm2     | serine/arginine repetitive matrix 2                                                 | 11 | 3  | 1 |
| 31982726  | Srpk1     | serine/arginine-rich protein specific kinase 1                                      | 0  | 1  | 0 |
| 9790111   | Srpk3     | serine/arginine-rich protein specific kinase 3                                      | 0  | 0  | 1 |
| 47059480  | Srpk2     | serine/arginine-rich protein-specific kinase 2                                      | 1  | 0  | 0 |
| 226958539 | Stk16     | serine/threonine kinase 16                                                          | 1  | 0  | 1 |
| 257467554 | Slk       | serine/threonine kinase 2                                                           | 16 | 0  | 0 |
| 21703922  | Stk24     | serine/threonine kinase 24                                                          | 1  | 0  | 0 |
| 89337277  | Stk25     | serine/threonine kinase 25                                                          | 2  | 2  | 0 |
| 7106391   | Stk30     | serine/threonine kinase 30                                                          | 1  | 0  | 0 |
| 27370078  | Stk38l    | serine/threonine kinase 38 like                                                     | 0  | 0  | 1 |
| 160707896 | Strap     | serine/threonine kinase receptor associated protein                                 | 2  | 4  | 0 |
| 160333312 | BC033915  | serine/threonine-protein kinase QSK                                                 | 0  | 0  | 1 |
| 32130521  | Sdccag1   | serologically defined colon cancer antigen 1                                        | 1  | 0  | 0 |
| 165932377 | Serbp1    | SERPINE1 mRNA binding protein 1 isoform 1                                           | 9  | 8  | 0 |
| 148540184 | Srfbp1    | serum response factor binding protein 1                                             | 0  | 1  | 1 |
| 257796265 | Sgk1      | serum/glucocorticoid regulated kinase 1 isoform e                                   | 0  | 1  | 0 |
| 326381098 | Sars      | seryl-tRNA synthetase                                                               | 10 | 13 | 0 |
| 228008415 | Sars2     | seryl-tRNA synthetase 2                                                             | 1  | 0  | 0 |
| 30840984  | Smyd2     | SET and MYND domain containing 2                                                    | 0  | 1  | 0 |
| 119508422 | Setd1a    | SET domain containing 1A                                                            | 0  | 2  | 0 |
| 197927225 | Setd2     | SET domain containing 2                                                             | 0  | 1  | 1 |
| 268370088 | Setd3     | SET domain containing 3                                                             | 1  | 0  | 0 |
| 227499783 | Scmh1     | sex comb on midleg 1 isoform 1                                                      | 2  | 0  | 0 |
| 31981264  | Polr3e    | sex-lethal interactor homolog                                                       | 0  | 1  | 0 |
| 124358938 | Sfi1      | Sfi1 homolog, spindle assembly associated                                           | 0  | 1  | 1 |

|           |               |                                                                                         |    |    |   |
|-----------|---------------|-----------------------------------------------------------------------------------------|----|----|---|
| 23956176  | Sugt1         | SGT1, suppressor of G2 allele of SKP1                                                   | 2  | 0  | 1 |
| 154090953 | Ctr9          | SH2 domain binding protein 1 (tetratricopeptide repeat containing)                      | 0  | 23 | 0 |
| 206597474 | Sh2d4a        | SH2 domain containing 4A                                                                | 1  | 0  | 0 |
| 148368971 | Sh3tc1        | SH3 domain and tetratricopeptide repeats 1                                              | 1  | 0  | 1 |
| 27369694  | Sh3bgrl2      | SH3 domain binding glutamic acid-rich protein like 2                                    | 0  | 4  | 0 |
| 18017602  | Sh3bgrl3      | SH3 domain binding glutamic acid-rich protein-like 3                                    | 1  | 3  | 0 |
| 226371694 | Sh3rf2        | SH3 domain containing ring finger 2 isoform 2                                           | 1  | 0  | 0 |
| 312176405 | Itsn2         | SH3 domain protein 1B                                                                   | 0  | 3  | 1 |
| 7305487   | Sh3yl1        | SH3 domain YSC-like 1                                                                   | 0  | 1  | 0 |
| 114145507 | Sh3rf1        | SH3 multiple domains 2                                                                  | 1  | 0  | 0 |
| 162287288 | Sh3rf3        | SH3 multiple domains 4                                                                  | 0  | 0  | 1 |
| 9910548   | Sh3bgrl       | SH3-binding domain glutamic acid-rich protein like                                      | 3  | 0  | 0 |
| 109150405 | Sh3bp5        | SH3-domain binding protein 5 (BTK-associated)                                           | 1  | 0  | 0 |
| 31560792  | Sh3gl2        | SH3-domain GRB2-like 2                                                                  | 0  | 0  | 1 |
| 9507097   | Sh3glb1       | SH3-domain GRB2-like B1                                                                 | 3  | 0  | 0 |
| 131889222 | Sdr39u1       | short chain dehydrogenase/reductase family 39U, member 1                                | 6  | 0  | 0 |
| 31982522  | Acads         | short-chain acyl-CoA dehydrogenase                                                      | 16 | 0  | 0 |
| 94818779  | Shroom4       | shroom family member 4                                                                  | 0  | 0  | 2 |
| 23956138  | Sbds          | Shwachman-Bodian-Diamond syndrome homolog                                               | 0  | 3  | 0 |
| 31560532  | Siae          | sialate O-acetyltransferase                                                             | 2  | 0  | 0 |
| 164518930 | Sdk1          | sidekick 1                                                                              | 0  | 0  | 1 |
| 15147224  | Sfxn1         | sideroflexin 1                                                                          | 9  | 0  | 2 |
| 295821212 | Sfxn3         | sideroflexin 3                                                                          | 5  | 0  | 1 |
| 13385134  | Spcs2         | signal peptidase complex subunit 2 homolog                                              | 4  | 1  | 5 |
| 125988403 | Spcs3         | signal peptidase complex subunit 3                                                      | 4  | 2  | 3 |
| 52138546  | Scube3        | signal peptide, CUB domain, EGF-like 3                                                  | 0  | 0  | 1 |
| 6678133   | Srp14         | signal recognition particle 14                                                          | 1  | 1  | 0 |
| 31981338  | Srp54a        | signal recognition particle 54a                                                         | 1  | 0  | 3 |
| 47271535  | Srp68         | signal recognition particle 68                                                          | 9  | 0  | 2 |
| 118344452 | Srp72         | signal recognition particle 72                                                          | 11 | 1  | 3 |
| 6755662   | Srp9          | signal recognition particle 9                                                           | 3  | 2  | 0 |
| 27229036  | Srpr          | signal recognition particle receptor                                                    | 0  | 0  | 1 |
| 6678137   | Srprb         | signal recognition particle receptor, B subunit                                         | 4  | 1  | 1 |
| 165377206 | Ssr1          | signal sequence receptor, alpha                                                         | 4  | 1  | 2 |
| 262050625 | Ssr4          | signal sequence receptor, delta                                                         | 3  | 3  | 3 |
| 21312968  | Ssr3          | signal sequence receptor, gamma                                                         | 1  | 2  | 1 |
| 6755668   | Stam          | signal transducing adaptor molecule (SH3 domain and ITAM motif) 1                       | 1  | 0  | 0 |
| 9789975   | Stam2         | signal transducing adaptor molecule (SH3 domain and ITAM motif) 2                       | 1  | 0  | 0 |
| 269784721 | Sipa111       | signal-induced proliferation-associated 1 like 1                                        | 1  | 0  | 0 |
| 124486630 | Sipa113       | signal-induced proliferation-associated 1 like 3                                        | 0  | 1  | 0 |
| 254540118 | 1110033M05Rik | similar to 1110033M05Rik protein isoform 6                                              | 0  | 1  | 0 |
| 149251861 | EG668804      | similar to 14-3-3 protein theta-subtype                                                 | 0  | 1  | 0 |
| 149272169 | LOC100039828  | similar to 40S ribosomal protein S12 isoform 1                                          | 1  | 0  | 0 |
| 82999720  | EG632013      | similar to 40S ribosomal protein S29                                                    | 1  | 0  | 0 |
| 247494016 | 4930422G04Rik | similar to 4930422G04Rik protein                                                        | 1  | 1  | 0 |
| 309263460 | LOC638236     | similar to 60S ribosomal protein L13a (Transplantation antigen P198) (Tum-P198 antigen) | 1  | 0  | 0 |
| 149233808 | EG666644      | similar to Ac2-210                                                                      | 0  | 1  | 0 |
| 94369748  | EG668300      | similar to Acidic ribosomal phosphoprotein P0                                           | 1  | 1  | 1 |

|           |               |                                                                                                             |   |   |   |
|-----------|---------------|-------------------------------------------------------------------------------------------------------------|---|---|---|
| 298566265 | Adamtsl3      | similar to ADAMTS-like protein 3 precursor (ADAMTSL-3) (Punctin-2)                                          | 1 | 1 | 1 |
| 294460012 | Aldh3b2       | similar to Aldehyde dehydrogenase 3 family, member B1                                                       | 3 | 0 | 0 |
| 149265291 | LOC635583     | similar to Annexin A8                                                                                       | 0 | 1 | 0 |
| 94364066  | LOC632433     | similar to Arl4c protein                                                                                    | 1 | 0 | 0 |
| 149251179 | LOC669780     | similar to arylacetamide deacetylase-like 2                                                                 | 0 | 0 | 1 |
| 149270685 | LOC100047762  | similar to Aspartate aminotransferase, cytoplasmic (Transaminase A) (Glutamate oxaloacetate transaminase 1) | 1 | 0 | 0 |
| 149253008 | LOC675933     | similar to AT rich interactive domain 1A (Swi1 like)                                                        | 0 | 1 | 1 |
| 149254291 | LOC100046123  | similar to ATP-binding cassette transporter ABCG3                                                           | 0 | 1 | 0 |
| 309268955 | Dnahc3        | similar to axonemal heavy chain dynein type 3                                                               | 0 | 1 | 0 |
| 242247270 | Igsf10        | similar to bone specific CMF608 isoform 4                                                                   | 1 | 1 | 0 |
| 253683505 | BM948371      | similar to Brain-enriched guanylate kinase-associated protein isoform 1                                     | 0 | 1 | 0 |
| 309266482 | LOC100048185  | similar to Btf3 protein                                                                                     | 1 | 0 | 0 |
| 149271901 | LOC100045848  | similar to BUD31 homolog (S. cerevisiae) isoform 1                                                          | 0 | 2 | 2 |
| 256985117 | C530008M17Rik | similar to C530008M17Rik protein isoform 3                                                                  | 0 | 0 | 1 |
| 149271283 | Gm40          | similar to CDNA sequence BC049702                                                                           | 0 | 1 | 0 |
| 149255689 | LOC545867     | similar to Chain , Calmodulin                                                                               | 0 | 0 | 1 |
| 82931765  | EG620071      | similar to Chain C, Structure Of A Hif-1a-Pvhl-Elonginb-Elonginc Complex                                    | 0 | 1 | 0 |
| 94406333  | LOC677171     | similar to chromosome 10 open reading frame 79                                                              | 0 | 1 | 0 |
| 309271759 | AU042671      | similar to chromosome 12 open reading frame 51                                                              | 0 | 0 | 1 |
| 149260570 | LOC635524     | similar to chromosome 6 open reading frame 97                                                               | 0 | 1 | 1 |
| 237874196 | Dnahc7b       | similar to ciliary dynein heavy chain 7                                                                     | 1 | 0 | 0 |
| 309264118 | E030010N08Rik | similar to ciliary rootlet coiled-coil, rootletin                                                           | 0 | 1 | 1 |
| 306482605 | Cngb1         | similar to Cngb1 protein                                                                                    | 0 | 1 | 0 |
| 309267099 | LOC640856     | similar to Coenzyme Q9 homolog (yeast)                                                                      | 1 | 0 | 0 |
| 254692857 | Col22a1       | similar to collagen, type XXII, alpha 1, isoform 3                                                          | 1 | 0 | 0 |
| 83002193  | EG546337      | similar to conserved nuclear protein Nhn1 isoform 5                                                         | 1 | 1 | 0 |
| 258679439 | LOC100048644  | similar to CSRP2BP                                                                                          | 0 | 1 | 0 |
| 293651591 | 1700085A12Rik | similar to cysteine-rich perinuclear theca 15                                                               | 1 | 0 | 0 |
| 293651623 | EG627788      | similar to cytoplasmic dynein light chain 1                                                                 | 0 | 0 | 1 |
| 149233608 | LOC100039733  | similar to DNA-directed RNA polymerase II largest subunit                                                   | 1 | 0 | 0 |
| 309266910 | LOC676177     | similar to doublesex and mab-3 related transcription factor 8.2                                             | 1 | 0 | 0 |
| 309269554 | EG666542      | similar to EG210583 protein                                                                                 | 0 | 0 | 1 |
| 237858808 | AI462493      | similar to Expressed sequence AI462493 isoform 3                                                            | 1 | 0 | 0 |
| 149270813 | EG240669      | similar to Family with sequence similarity 26, member A                                                     | 0 | 0 | 1 |
| 309269321 | EG623459      | similar to Fas apoptotic inhibitory molecule                                                                | 1 | 0 | 0 |
| 309267696 | Fsip2         | similar to fibrous sheath-interacting protein 2                                                             | 2 | 2 | 1 |
| 149272377 | LOC100047108  | similar to FIGF                                                                                             | 0 | 0 | 1 |
| 254911027 | Nbeal2        | similar to FLJ00341 protein                                                                                 | 1 | 1 | 1 |
| 255069717 | Fry           | similar to furry homolog (Drosophila)                                                                       | 1 | 1 | 0 |
| 309265697 | EG667035      | similar to fusion protein: ubiquitin (bases 43_513); ribosomal protein S27a (bases 217_532)                 | 1 | 0 | 0 |
| 94372553  | LOC664894     | similar to fusion protein: ubiquitin (bases 43_513); ribosomal protein S27a (bases 217_532)                 | 1 | 1 | 1 |
| 149255315 | LOC100043516  | similar to gag                                                                                              | 0 | 0 | 1 |
| 149255052 | LOC100039514  | similar to gag protein                                                                                      | 1 | 0 | 0 |
| 149274424 | LOC100045495  | similar to Gene model 397, (NCBI)                                                                           | 0 | 0 | 1 |

|           |               |                                                                       |    |    |    |
|-----------|---------------|-----------------------------------------------------------------------|----|----|----|
| 309265876 | LOC676974     | similar to Glucose phosphate isomerase 1 isoform 2                    | 0  | 1  | 0  |
| 226958407 | Grip2         | similar to glutamate receptor interacting protein 2                   | 1  | 0  | 0  |
| 149260720 | EG215974      | similar to Glyceraldehyde-3-phosphate dehydrogenase                   | 1  | 0  | 1  |
| 149275059 | LOC100047352  | similar to Glyceraldehyde-3-phosphate dehydrogenase (GAPDH)           | 2  | 0  | 1  |
| 149257623 | LOC100041204  | similar to Glyceraldehyde-3-phosphate dehydrogenase (GAPDH)           | 1  | 0  | 0  |
| 82996390  | EG433184      | similar to Glyceraldehyde-3-phosphate dehydrogenase (GAPDH)           | 1  | 0  | 0  |
| 94387946  | EG666342      | similar to Glyceraldehyde-3-phosphate dehydrogenase (GAPDH)           | 1  | 0  | 0  |
| 149270673 | LOC676923     | similar to Glyceraldehyde-3-phosphate dehydrogenase (GAPDH)           | 1  | 0  | 0  |
| 149260748 | EG668192      | similar to Glyceraldehyde-3-phosphate dehydrogenase (GAPDH)           | 1  | 0  | 0  |
| 149253819 | LOC100039258  | similar to Glyceraldehyde-3-phosphate dehydrogenase (GAPDH) isoform 1 | 2  | 0  | 0  |
| 309266468 | LOC100048117  | similar to Glyceraldehyde-3-phosphate dehydrogenase (GAPDH) isoform 1 | 2  | 0  | 0  |
| 149265160 | LOC100042427  | similar to Glyceraldehyde-3-phosphate dehydrogenase (GAPDH) isoform 4 | 26 | 5  | 16 |
| 149272161 | EG545741      | similar to glyceraldehyde-3-phosphate-dehydrogenase isoform 1         | 1  | 0  | 0  |
| 149233991 | D230012E17Rik | similar to GPI inositol-deacylase                                     | 6  | 0  | 5  |
| 309272714 | EG621605      | similar to guanylate binding protein 1                                | 1  | 0  | 0  |
| 251823773 | Tchh          | similar to hCG1642996                                                 | 1  | 0  | 1  |
| 82879785  | EG241084      | similar to hCG1645016                                                 | 1  | 0  | 0  |
| 94379513  | EG243866      | similar to hCG1645909                                                 | 0  | 0  | 1  |
| 307548934 | Gm600         | similar to hCG17291                                                   | 1  | 0  | 0  |
| 254692843 | Dnahc10       | similar to hCG1811879                                                 | 1  | 1  | 1  |
| 283837762 | Dnahc17       | similar to hCG1813078                                                 | 0  | 1  | 1  |
| 94377283  | EG638904      | similar to hCG2001479                                                 | 2  | 0  | 0  |
| 293629333 | LOC100040766  | similar to hCG2012694                                                 | 1  | 0  | 1  |
| 268607621 | Asxl3         | similar to hCG2042958                                                 | 0  | 1  | 0  |
| 149265633 | LOC100042960  | similar to hCG28707                                                   | 0  | 0  | 1  |
| 149233911 | LOC433313     | similar to hCG39912, isoform 1                                        | 2  | 1  | 1  |
| 256818750 | 4921511H13Rik | similar to hCG401196                                                  | 1  | 15 | 4  |
| 254675181 | Alpk2         | similar to heart alpha-kinase isoform 1                               | 0  | 1  | 0  |
| 309266096 | EG628779      | similar to heparan sulfate D-glucosaminyl 3-O-sulfotransferase 4      | 1  | 0  | 0  |
| 309267107 | LOC100045191  | similar to heterogeneous nuclear ribonucleoprotein A2/B1              | 0  | 0  | 1  |
| 149266569 | EG432946      | similar to heterogeneous nuclear ribonucleoprotein A3                 | 0  | 1  | 0  |
| 51769129  | EG432946      | similar to heterogeneous nuclear ribonucleoprotein A3, isoform 1      | 0  | 1  | 0  |
| 149264565 | LOC100046853  | similar to heterogeneous nuclear ribonucleoprotein K                  | 1  | 0  | 1  |
| 149270322 | LOC100046594  | similar to heterogeneous nuclear ribonucleoprotein U-like 2           | 0  | 0  | 1  |
| 149258387 | LOC100041140  | similar to high-mobility group box 1                                  | 1  | 0  | 0  |
| 309262982 | EG619937      | similar to high-mobility group box 1                                  | 1  | 0  | 0  |
| 38091641  | LOC382523     | similar to histone H3                                                 | 1  | 0  | 2  |
| 149269271 | LOC100045318  | similar to HLA-B associated transcript 1                              | 0  | 1  | 1  |
| 149249568 | LOC100048439  | similar to homeodomain interacting protein kinase 3                   | 1  | 0  | 0  |
| 149264489 | LOC674779     | similar to hypothetical protein                                       | 0  | 0  | 1  |
| 251823781 | Rgag1         | similar to hypothetical protein                                       | 0  | 1  | 0  |
| 325995159 | AI607873      | similar to interferon activated gene 204                              | 0  | 0  | 1  |



|           |               |                                                                                                                                                            |   |    |   |
|-----------|---------------|------------------------------------------------------------------------------------------------------------------------------------------------------------|---|----|---|
| 257196179 | Irf2bp2       | similar to interferon regulatory factor 2 binding protein 2                                                                                                | 1 | 0  | 0 |
| 149241402 | LOC640480     | similar to isolog of yeast sui1 and rice gos2; putative                                                                                                    | 0 | 1  | 0 |
| 309271358 | EG278181      | similar to KIAA0026                                                                                                                                        | 0 | 1  | 1 |
| 257467664 | Mtmr15        | similar to KIAA1018                                                                                                                                        | 0 | 1  | 0 |
| 309271872 | Gm22          | similar to KIAA1858 protein                                                                                                                                | 0 | 1  | 0 |
| 149266955 | EG626280      | similar to KIAA1875 protein                                                                                                                                | 0 | 1  | 0 |
| 149263538 | LOC100041194  | similar to KIAA2019 protein                                                                                                                                | 0 | 1  | 0 |
| 305678350 | LOC100042970  | similar to Kifc1 protein                                                                                                                                   | 1 | 0  | 0 |
| 149254657 | EG231836      | similar to Kinesin-like protein KIF19                                                                                                                      | 1 | 1  | 0 |
| 149262700 | LOC675403     | similar to likely ortholog of H. sapiens myosin XVB (MYO15B)                                                                                               | 1 | 0  | 1 |
| 254540089 | Prpsap1       | similar to likely ortholog of H. sapiens phosphoribosyl pyrophosphate synthetase-associated protein 1 (PRPSAP1)                                            | 7 | 0  | 0 |
| 149268013 | LOC100048441  | similar to Lipase member I precursor (Membrane-associated phosphatidic acid-selective phospholipase A1-beta) (mPA-PLA1 beta) (LPD lipase)                  | 0 | 0  | 1 |
| 38089095  | EG384770      | similar to Lman2l protein                                                                                                                                  | 0 | 1  | 0 |
| 82965664  | LOC638521     | similar to LOC152217 protein                                                                                                                               | 1 | 0  | 0 |
| 307691260 | EG627607      | similar to LOC314328 protein                                                                                                                               | 1 | 0  | 0 |
| 149269308 | LOC677414     | similar to LOC494798 protein                                                                                                                               | 1 | 0  | 0 |
| 256542283 | 4930403N07Rik | similar to LOC500668 protein                                                                                                                               | 1 | 1  | 0 |
| 283483997 | Mgam          | similar to maltase-glucoamylase                                                                                                                            | 0 | 0  | 2 |
| 254540144 | 2700049A03Rik | similar to mKIAA0586 protein                                                                                                                               | 2 | 0  | 0 |
| 269315858 | D830031N03Rik | similar to mKIAA0754 protein                                                                                                                               | 0 | 0  | 1 |
| 256773220 | Synj1         | similar to mKIAA0910 protein                                                                                                                               | 1 | 0  | 0 |
| 30527367  | Rbm16         | similar to mKIAA1116 protein isoform 1                                                                                                                     | 0 | 1  | 1 |
| 149275319 | LOC100048886  | similar to mKIAA1266 protein                                                                                                                               | 0 | 1  | 0 |
| 244790458 | D630023B12Rik | similar to mKIAA1450 protein                                                                                                                               | 0 | 1  | 0 |
| 237820699 | Mocs3         | similar to molybdenum cofactor synthesis 3                                                                                                                 | 0 | 0  | 1 |
| 244790081 | Megf6         | similar to Multiple epidermal growth factor-like domains 6 precursor (EGF-like domain-containing protein 3) (Multiple EGF-like domain protein 3) isoform 4 | 0 | 0  | 1 |
| 82999755  | LOC208428     | similar to Mus musculus ribosomal protein L19                                                                                                              | 1 | 0  | 0 |
| 237874229 | Ccdc112       | similar to mutated in bladder cancer 1                                                                                                                     | 0 | 0  | 1 |
| 149250584 | LOC100045569  | similar to Myef2 protein                                                                                                                                   | 0 | 1  | 1 |
| 257743033 | Mll2          | similar to myeloid/lymphoid or mixed-lineage leukemia 2                                                                                                    | 0 | 26 | 1 |
| 94363510  | EG433297      | similar to MYL6 protein                                                                                                                                    | 0 | 1  | 1 |
| 254692972 | Cdc42bpa      | similar to mytonic dystrophy kinase-related Cdc42-binding kinase isoform 12                                                                                | 1 | 0  | 1 |
| 309272446 | EG635702      | similar to N-acetylated alpha-linked acidic dipeptidase 2                                                                                                  | 3 | 0  | 1 |
| 254588079 | Nat11         | similar to N-acetyltransferase 11 isoform 9                                                                                                                | 0 | 2  | 3 |
| 149270003 | LOC100046168  | similar to Nedd4 WW domain-binding protein 5                                                                                                               | 0 | 1  | 0 |
| 83029991  | EG625558      | similar to novel KRAB box containing protein                                                                                                               | 0 | 1  | 0 |
| 149243283 | LOC100043998  | similar to nuclear pore complex-associated intranuclear coiled-coil protein TPR                                                                            | 0 | 1  | 0 |
| 82916707  | EG330731      | similar to nuclear receptor coactivator 6 interacting protein                                                                                              | 1 | 0  | 0 |
| 309267711 | Olf1177       | similar to olfactory receptor Olf1177                                                                                                                      | 1 | 0  | 1 |
| 149267809 | LOC100046998  | similar to optic atrophy 1 (autosomal dominant)                                                                                                            | 1 | 0  | 0 |
| 149256029 | EG435927      | similar to organic anion transporting polypeptide 2                                                                                                        | 0 | 0  | 1 |
| 254553305 | Krt33b        | similar to ortholog of keratin, hair, acidic, 3B KRTHA3B (Homo sapiens)                                                                                    | 0 | 0  | 1 |

|           |               |                                                                                                                                                                                        |    |   |   |
|-----------|---------------|----------------------------------------------------------------------------------------------------------------------------------------------------------------------------------------|----|---|---|
| 242397450 | Pcsk6         | similar to PACE4A isoform 4                                                                                                                                                            | 0  | 0 | 1 |
| 226958612 | Rbm27         | similar to peri implantation stem cell 1 isoform 5                                                                                                                                     | 2  | 0 | 0 |
| 26024309  | Ppat          | similar to Phosphoribosyl pyrophosphate amidotransferase isoform 8                                                                                                                     | 1  | 0 | 0 |
| 149270675 | LOC100047698  | similar to Pi4k2a protein                                                                                                                                                              | 0  | 1 | 0 |
| 254587980 | Plac8l1       | similar to Plac8l1 protein                                                                                                                                                             | 0  | 0 | 1 |
| 94404242  | EG664925      | similar to pORF1                                                                                                                                                                       | 0  | 1 | 0 |
| 149253581 | LOC100047076  | similar to potassium channel erg1a                                                                                                                                                     | 1  | 0 | 0 |
| 226958682 | Prdm9         | similar to PR domain-containing 9 isoform 3                                                                                                                                            | 0  | 1 | 0 |
| 149252767 | LOC635091     | similar to Predicted gene, OTTMUSG00000007485                                                                                                                                          | 0  | 0 | 1 |
| 149274761 | LOC641199     | similar to preserine protease                                                                                                                                                          | 1  | 0 | 1 |
| 149263001 | LOC634933     | similar to protein phosphatase 1, catalytic subunit                                                                                                                                    | 1  | 0 | 0 |
| 82801212  | LOC622019     | similar to protein-tyrosine phosphatase                                                                                                                                                | 1  | 0 | 0 |
| 149249895 | LOC668629     | similar to PTPRJ                                                                                                                                                                       | 0  | 1 | 0 |
| 149275157 | LOC637110     | similar to putative pheromone receptor                                                                                                                                                 | 1  | 0 | 0 |
| 149269027 | LOC637519     | similar to putative pheromone receptor                                                                                                                                                 | 1  | 0 | 0 |
| 242397505 | Zbtb10        | similar to putative RIN zinc finger protein                                                                                                                                            | 0  | 0 | 1 |
| 82918783  | LOC631966     | similar to putative translation initiation factor A121/Sui1                                                                                                                            | 1  | 1 | 0 |
| 255003810 | Rab3gap2      | similar to Rab3 GTPase-activating protein non-catalytic subunit (Rab3 GTPase-activating protein 150 kDa subunit) (Rab3-GAP p150) (Rab3-GAP regulatory subunit) (RAB3-GAP150) isoform 4 | 0  | 1 | 1 |
| 226958601 | Golgb1        | similar to rat GCP360 isoform 9                                                                                                                                                        | 26 | 0 | 0 |
| 51771609  | EG433251      | similar to rat ribosomal protein L13a                                                                                                                                                  | 0  | 1 | 1 |
| 149266523 | LOC635821     | similar to Regulator of G-protein signalling 22                                                                                                                                        | 1  | 1 | 1 |
| 295293136 | Gm62          | similar to Ret finger protein-like 4B                                                                                                                                                  | 0  | 1 | 0 |
| 94395028  | EG623505      | similar to ribosomal protein                                                                                                                                                           | 0  | 0 | 1 |
| 149264584 | LOC100047250  | similar to ribosomal protein                                                                                                                                                           | 1  | 0 | 0 |
| 309266241 | EG234159      | similar to ribosomal protein                                                                                                                                                           | 0  | 1 | 0 |
| 149266455 | EG382974      | similar to ribosomal protein                                                                                                                                                           | 0  | 1 | 0 |
| 309269954 | EG630612      | similar to ribosomal protein                                                                                                                                                           | 0  | 1 | 0 |
| 149261258 | EG382371      | similar to ribosomal protein                                                                                                                                                           | 1  | 0 | 0 |
| 149233917 | LOC100043141  | similar to ribosomal protein L10a                                                                                                                                                      | 1  | 0 | 1 |
| 149233970 | LOC667014     | similar to ribosomal protein L15                                                                                                                                                       | 0  | 0 | 1 |
| 149233662 | LOC675046     | similar to Ribosomal protein L17                                                                                                                                                       | 1  | 0 | 1 |
| 149274710 | LOC100047860  | similar to ribosomal protein L21                                                                                                                                                       | 1  | 0 | 0 |
| 149233972 | LOC100045169  | similar to ribosomal protein L23a                                                                                                                                                      | 0  | 1 | 0 |
| 82904486  | EG626330      | similar to ribosomal protein L23a                                                                                                                                                      | 1  | 0 | 0 |
| 94364049  | EG383538      | similar to ribosomal protein L35                                                                                                                                                       | 1  | 0 | 0 |
| 149263693 | LOC100047275  | similar to ribosomal protein L7a                                                                                                                                                       | 0  | 1 | 0 |
| 149269353 | LOC635310     | similar to ribosomal protein S2 isoform 2                                                                                                                                              | 1  | 1 | 0 |
| 258613902 | 4921509A18Rik | similar to RIKEN cDNA 4921509A18 gene                                                                                                                                                  | 0  | 0 | 1 |
| 254939609 | B230315N10Rik | similar to RIKEN cDNA B230315N10 gene isoform 1                                                                                                                                        | 0  | 1 | 0 |
| 149261303 | LOC100045963  | similar to Ring finger protein 126                                                                                                                                                     | 0  | 1 | 0 |
| 94380478  | EG668807      | similar to RNP particle component                                                                                                                                                      | 0  | 1 | 0 |
| 149262347 | LOC100047501  | similar to Rps16 protein                                                                                                                                                               | 0  | 1 | 0 |
| 149267883 | LOC677344     | similar to S-adenosylhomocysteine hydrolase                                                                                                                                            | 1  | 0 | 0 |
| 254028159 | Safb          | similar to Scaffold attachment factor B (Scaffold attachment factor B1) (SAF-B) isoform 18                                                                                             | 1  | 7 | 6 |
| 149269058 | LOC100046735  | similar to Serine/arginine repetitive matrix protein 2                                                                                                                                 | 2  | 0 | 0 |
| 149269060 | LOC100046744  | similar to Serine/arginine repetitive matrix protein 2                                                                                                                                 | 1  | 0 | 0 |
| 307574641 | EG244495      | similar to Shugoshin-like 2 (S. pombe)                                                                                                                                                 | 0  | 0 | 1 |
| 149257356 | LOC100047155  | similar to Small nuclear ribonucleoprotein polypeptide A                                                                                                                               | 0  | 2 | 1 |

|           |                   |                                                                        |    |    |    |
|-----------|-------------------|------------------------------------------------------------------------|----|----|----|
| 82999759  | LOC436185         | similar to SMPTB                                                       | 1  | 1  | 2  |
| 94390815  | LOC629924         | similar to SMT3B protein                                               | 0  | 0  | 1  |
| 149258111 | D030022P06Rik     | similar to Snf2-related CBP activator protein                          | 1  | 0  | 0  |
| 309268993 | LOC100043597      | similar to Snf2-related CBP activator protein                          | 0  | 0  | 1  |
| 82954659  | EG625730          | similar to Snrpf protein                                               | 1  | 1  | 1  |
| 283549150 | Shank1            | similar to SPANK-1 isoform 1                                           | 0  | 1  | 0  |
| 82998851  | Gm1276            | similar to sperm protein SSP3111                                       | 0  | 0  | 1  |
| 149274601 | LOC100045296      | similar to Stat3B                                                      | 0  | 0  | 1  |
| 309271465 | LOC331476         | similar to SUMO-1-specific protease                                    | 1  | 0  | 0  |
| 149273859 | LOC100042409      | similar to Sycp3 like Y-linked isoform 1                               | 1  | 0  | 0  |
| 226958463 | Synpo2            | similar to Synaptopodin-2 (Myopodin) isoform 3                         | 1  | 0  | 0  |
| 309270935 | Syngap1           | similar to SynGAP-a                                                    | 0  | 1  | 0  |
| 149266187 | LOC100043969      | similar to T cell receptor alpha                                       | 0  | 1  | 0  |
| 254692944 | Ttc18             | similar to Tetratricopeptide repeat domain 18                          | 0  | 1  | 0  |
| 256017222 | Tmcc1             | similar to Tmcc1 protein isoform 8                                     | 0  | 1  | 0  |
| 94410650  | LOC631309         | similar to Tmem16h protein                                             | 1  | 1  | 0  |
| 149259424 | LOC100039215      | similar to translin associated protein X isoform 1                     | 0  | 1  | 0  |
| 149233754 | LOC100047318      | similar to transmembrane protein 131                                   | 1  | 0  | 0  |
| 94397122  | EG667604          | similar to TRAV8-2                                                     | 1  | 0  | 0  |
| 94390139  | LOC668206         | similar to Ubiquitin A-52 residue ribosomal protein fusion product 1   | 1  | 0  | 1  |
| 82950513  | EG621629          | similar to Ubx4 protein                                                | 0  | 0  | 1  |
| 304361750 | 3425401B19Rik     | similar to Uncharacterized protein C10orf71                            | 0  | 0  | 1  |
| 309268933 | Gm1966            | similar to very large inducible GTPase 1                               | 1  | 1  | 1  |
| 256818776 | Wdr52             | similar to WD repeat domain 52                                         | 2  | 0  | 1  |
| 149258232 | ENSMUSG0000046088 | similar to Zfp758 protein                                              | 1  | 0  | 0  |
| 33859628  | Six2              | sine oculis-related homeobox 2 homolog                                 | 0  | 1  | 0  |
| 110625701 | Sigirr            | single Ig IL-1 receptor related protein                                | 1  | 0  | 0  |
| 47059026  | Ssbp1             | single-stranded DNA binding protein 1 isoform 1                        | 5  | 0  | 2  |
| 30578432  | Sirt5             | sirtuin 5 (silent mating type information regulation 2 homolog) 5      | 1  | 0  | 0  |
| 254939656 | Sirt6             | sirtuin 6 isoform 1                                                    | 0  | 1  | 0  |
| 158636012 | Ssb               | Sjogren syndrome antigen B                                             | 10 | 11 | 12 |
| 110347531 | Mib2              | skeletrophin                                                           | 1  | 0  | 0  |
| 146149191 | Snw1              | SKI interacting protein                                                | 6  | 3  | 10 |
| 130502130 | Asprv1            | skin aspartic protease                                                 | 1  | 0  | 0  |
| 56699418  | Slitrk5           | SLIT and NTRK-like family, member 5                                    | 1  | 0  | 0  |
| 113205055 | Ski               | Sloan-Kettering viral oncogene homolog                                 | 1  | 0  | 0  |
| 227430375 | Snip1             | Smad nuclear interacting protein 1                                     | 1  | 1  | 0  |
| 17978282  | Kcnn2             | small conductance calcium-activated potassium channel protein 2        | 0  | 1  | 0  |
| 27229283  | Rexo2             | small fragment nuclease                                                | 2  | 0  | 0  |
| 21313588  | Sgta              | small glutamine-rich tetratricopeptide repeat (TPR) containing protein | 9  | 0  | 0  |
| 21450231  | Sgtb              | small glutamine-rich tetratricopeptide repeat (TPR)-containing, beta   | 0  | 0  | 1  |
| 114145487 | Rragc             | small GTPase homolog                                                   | 2  | 0  | 0  |
| 126012517 | Aimp1             | small inducible cytokine subfamily E, member 1                         | 12 | 3  | 0  |
| 6678055   | Snrpd1            | small nuclear ribonucleoprotein D1                                     | 3  | 5  | 5  |
| 58037145  | Snrpd2            | small nuclear ribonucleoprotein D2                                     | 1  | 7  | 6  |
| 13385598  | Snrpd3            | small nuclear ribonucleoprotein D3                                     | 2  | 3  | 3  |
| 27883844  | Snrpe             | small nuclear ribonucleoprotein E                                      | 2  | 5  | 4  |
| 133725813 | Snrpn             | small nuclear ribonucleoprotein N                                      | 6  | 7  | 8  |
| 114052541 | Snrpa             | small nuclear ribonucleoprotein polypeptide A                          | 2  | 7  | 3  |

|           |               |                                                                                                         |    |    |    |
|-----------|---------------|---------------------------------------------------------------------------------------------------------|----|----|----|
| 254028189 | Snrpf         | small nuclear ribonucleoprotein polypeptide F                                                           | 1  | 5  | 3  |
| 13385994  | Snrpg         | small nuclear ribonucleoprotein polypeptide G                                                           | 2  | 3  | 2  |
| 30409986  | Snapc1        | small nuclear RNA activating complex, polypeptide 1                                                     | 0  | 0  | 1  |
| 27261820  | Snapc4        | small nuclear RNA activating complex, polypeptide 4                                                     | 0  | 0  | 1  |
| 7657601   | Solh          | small optic lobes                                                                                       | 1  | 0  | 0  |
| 31981251  | 2500003M10Rik | small protein rich in arginine and glycine                                                              | 1  | 2  | 4  |
| 148839318 | Smchd1        | SMC hinge domain containing 1                                                                           | 1  | 83 | 7  |
| 258613892 | Smc1a         | SMC1 structural maintenance of chromosomes 1-like 1                                                     | 2  | 41 | 29 |
| 24415998  | Smc6          | SMC6 protein                                                                                            | 0  | 1  | 8  |
| 46849745  | Smek1         | SMEK homolog 1, suppressor of mek1 isoform 1                                                            | 1  | 0  | 0  |
| 262231766 | Smek2         | SMEK homolog 2, suppressor of mek1                                                                      | 4  | 0  | 0  |
| 27477043  | Efha1         | Smhs2 homolog                                                                                           | 3  | 2  | 1  |
| 6678489   | Sumo1         | SMT3 suppressor of mif two 3 homolog 1                                                                  | 0  | 2  | 0  |
| 19111164  | Sumo2         | SMT3 supressor of mif two 3 homolog 2                                                                   | 1  | 1  | 0  |
| 227430367 | Smu1          | smu-1 suppressor of mec-8 and unc-52 homolog                                                            | 0  | 12 | 14 |
| 116089329 | P140          | Snap-25-interacting protein                                                                             | 0  | 0  | 3  |
| 257196125 | Snrk          | SNF related kinase                                                                                      | 0  | 1  | 0  |
| 38569497  | Sik2          | SNF1-like kinase 2                                                                                      | 1  | 0  | 0  |
| 324021709 | Lsm2          | snRNP core protein SMX5 isoform 2                                                                       | 4  | 7  | 2  |
| 270341361 | Shoc2         | soc-2 (suppressor of clear) homolog                                                                     | 1  | 3  | 1  |
| 160707887 | Scn3a         | sodium channel, voltage-gated, type III, alpha                                                          | 0  | 0  | 1  |
| 157058300 | Scn7a         | sodium channel, voltage-gated, type VII, alpha polypeptide                                              | 1  | 0  | 1  |
| 133987591 | Scn11a        | sodium channel, voltage-gated, type XI, alpha                                                           | 0  | 1  | 0  |
| 21313062  | Slc10a6       | sodium-dependent organic anion transporter                                                              | 0  | 0  | 1  |
| 6678001   | Slc1a1        | solute carrier family 1 (neuronal/epithelial high affinity glutamate transporter, system Xag), member 1 | 0  | 1  | 0  |
| 281371456 | Slc12a9       | solute carrier family 12 (potassium/chloride transporters), member 9                                    | 1  | 0  | 0  |
| 19527112  | Slc15a4       | solute carrier family 15, member 4                                                                      | 1  | 1  | 0  |
| 6677995   | Slc16a1       | solute carrier family 16, member 1                                                                      | 5  | 0  | 1  |
| 71067107  | Slc16a6       | solute carrier family 16, member 6 isoform a                                                            | 0  | 1  | 0  |
| 165377226 | Slc2a1        | solute carrier family 2 (facilitated glucose transporter), member 1                                     | 1  | 0  | 0  |
| 226437623 | Slc2a12       | solute carrier family 2 (facilitated glucose transporter), member 12                                    | 0  | 1  | 0  |
| 156231035 | Slc2a9        | solute carrier family 2, member 9 isoform 2                                                             | 0  | 0  | 1  |
| 21312994  | Slc25a11      | solute carrier family 25 (mitochondrial carrier oxoglutarate carrier), member 11                        | 10 | 1  | 10 |
| 148747424 | Slc25a4       | solute carrier family 25 (mitochondrial carrier, adenine nucleotide translocator), member 4             | 16 | 6  | 13 |
| 254826790 | Slc25a10      | solute carrier family 25 (mitochondrial carrier, dicarboxylate transporter), member 10                  | 15 | 0  | 6  |
| 294831970 | Slc25a22      | solute carrier family 25 (mitochondrial carrier, glutamate), member 22                                  | 0  | 0  | 1  |
| 29789024  | Slc25a17      | solute carrier family 25 (mitochondrial carrier, peroxisomal membrane protein), member 17               | 1  | 0  | 1  |
| 19526818  | Slc25a3       | solute carrier family 25 member 3                                                                       | 14 | 0  | 10 |
| 23943838  | Slc25a1       | solute carrier family 25, member 1                                                                      | 9  | 1  | 7  |
| 27369581  | Slc25a12      | solute carrier family 25, member 12                                                                     | 29 | 0  | 11 |
| 294832028 | Slc25a13      | solute carrier family 25, member 13                                                                     | 33 | 0  | 14 |
| 49274632  | Slc25a23      | solute carrier family 25, member 23                                                                     | 0  | 0  | 1  |
| 85719318  | Slc25a34      | solute carrier family 25, member 34                                                                     | 0  | 1  | 0  |
| 56090652  | Slc25a42      | solute carrier family 25, member 42                                                                     | 0  | 0  | 1  |

|           |          |                                                                                                      |    |   |    |
|-----------|----------|------------------------------------------------------------------------------------------------------|----|---|----|
| 22094075  | Slc25a5  | solute carrier family 25, member 5                                                                   | 1  | 0 | 1  |
| 31981655  | Slc26a6  | solute carrier family 26, member 6                                                                   | 1  | 0 | 1  |
| 45597453  | Slc27a4  | solute carrier family 27 (fatty acid transporter), member 4                                          | 3  | 0 | 0  |
| 91598783  | Slc28a3  | solute carrier family 28 (sodium-coupled nucleoside transporter), member 3                           | 0  | 1 | 0  |
| 238637279 | Slc3a2   | solute carrier family 3, member 2 isoform b                                                          | 3  | 0 | 0  |
| 52630421  | Slc30a4  | solute carrier family 30 (zinc transporter), member 4                                                | 0  | 0 | 1  |
| 31543730  | Slc33a1  | solute carrier family 33 (acetyl-CoA transporter), member 1                                          | 2  | 0 | 0  |
| 66793411  | Slc34a2  | solute carrier family 34 (sodium phosphate), member 2                                                | 0  | 0 | 1  |
| 29244214  | Slc35d1  | solute carrier family 35 (UDP-glucuronic acid/UDP-N-acetylgalactosamine dual transporter), member D1 | 0  | 0 | 1  |
| 21450281  | Slc35a3  | solute carrier family 35 (UDP-N-acetylglucosamine (UDP-GlcNAc) transporter), member 3                | 1  | 0 | 0  |
| 110625963 | Slc35b2  | solute carrier family 35, member B2                                                                  | 0  | 1 | 0  |
| 21450265  | Slc35c2  | solute carrier family 35, member C2                                                                  | 1  | 0 | 0  |
| 258645135 | Slc38a10 | solute carrier family 38, member 10                                                                  | 1  | 0 | 0  |
| 205830420 | Slc39a14 | solute carrier family 39 (zinc transporter), member 14 isoform a                                     | 1  | 0 | 0  |
| 118150670 | Slc39a7  | solute carrier family 39, member 7                                                                   | 2  | 0 | 1  |
| 6755560   | Slc4a1   | solute carrier family 4 (anion exchanger), member 1                                                  | 0  | 0 | 1  |
| 155722992 | Slc4a1ap | solute carrier family 4 (anion exchanger), member 1, adaptor protein                                 | 0  | 1 | 0  |
| 117320529 | Slc4a7   | solute carrier family 4, sodium bicarbonate cotransporter, member 7                                  | 0  | 1 | 0  |
| 227499988 | Slc44a1  | solute carrier family 44, member 1 isoform A                                                         | 5  | 0 | 0  |
| 166197685 | Slc47a1  | solute carrier family 47, member 1                                                                   | 0  | 0 | 1  |
| 110347555 | Slc5a8   | solute carrier family 5 (iodide transporter), member 8                                               | 0  | 0 | 1  |
| 84794617  | Slc5a10  | solute carrier family 5 (sodium/glucose cotransporter), member 10                                    | 1  | 0 | 0  |
| 31982828  | Slc6a6   | solute carrier family 6 (neurotransmitter transporter, taurine), member 6                            | 1  | 0 | 0  |
| 28202019  | Slc6a15  | solute carrier family 6, member 15                                                                   | 1  | 1 | 0  |
| 6755566   | Slc9a3r1 | solute carrier family 9 (sodium/hydrogen exchanger), isoform 3 regulator 1                           | 8  | 5 | 0  |
| 226246650 | Slc9a3r2 | solute carrier family 9 isoform 3 regulator 2 isoform B                                              | 1  | 0 | 0  |
| 7305497   | Slco1a1  | solute carrier organic anion transporter family, member 1a1                                          | 1  | 0 | 0  |
| 58037373  | Slco6c1  | solute carrier organic anion transporter family, member 6c1                                          | 0  | 0 | 1  |
| 84370258  | Sstr3    | somatostatin receptor 3                                                                              | 0  | 0 | 1  |
| 124378037 | Son      | Son cell proliferation protein                                                                       | 0  | 5 | 30 |
| 117414170 | Sos1     | son of sevenless 1                                                                                   | 0  | 1 | 0  |
| 78000179  | Sorbs1   | sorbin and SH3 domain containing 1 isoform 2                                                         | 0  | 2 | 1  |
| 327315370 | Sorbs2   | sorbin and SH3 domain containing 2                                                                   | 0  | 3 | 4  |
| 6755504   | Sorbs3   | sorbin and SH3 domain containing 3                                                                   | 0  | 0 | 2  |
| 124430543 | Sri      | sorcic isoform 2                                                                                     | 3  | 0 | 1  |
| 158966696 | Sorcs1   | SORCS receptor 1                                                                                     | 0  | 1 | 0  |
| 34610211  | Sort1    | sortilin 1                                                                                           | 5  | 0 | 0  |
| 110625645 | Sort1    | sortilin-related receptor, LDLR class A repeats-containing                                           | 12 | 2 | 0  |
| 30519943  | Samm50   | sorting and assembly machinery component 50 homolog                                                  | 7  | 0 | 18 |
| 71043944  | Snx1     | sorting nexin 1                                                                                      | 2  | 0 | 0  |
| 13385878  | Snx2     | sorting nexin 2                                                                                      | 7  | 0 | 1  |
| 258613896 | Snx25    | sorting nexin 25                                                                                     | 1  | 1 | 0  |

|           |               |                                                         |    |     |     |
|-----------|---------------|---------------------------------------------------------|----|-----|-----|
| 30142699  | Snx26         | sorting nexin 26                                        | 0  | 0   | 1   |
| 21312778  | Snx29         | sorting nexin 29                                        | 1  | 1   | 0   |
| 31560433  | Snx3          | sorting nexin 3                                         | 5  | 0   | 0   |
| 31981209  | Snx31         | sorting nexin 31                                        | 1  | 1   | 0   |
| 66792896  | Snx32         | sorting nexin 32                                        | 0  | 0   | 1   |
| 312596940 | Snx5          | sorting nexin 5                                         | 2  | 0   | 1   |
| 27754031  | Snx6          | sorting nexin 6                                         | 2  | 0   | 0   |
| 26986581  | Snx8          | sorting nexin 8                                         | 0  | 1   | 0   |
| 29568084  | Snx9          | sorting nexin 9                                         | 0  | 2   | 0   |
| 33859789  | Snx30         | sorting nexin family member 30                          | 0  | 1   | 0   |
| 61651673  | Stt3b         | source of immunodominant MHC-associated peptides        | 2  | 0   | 1   |
| 148536867 | Sp3           | Sp3 transcription factor isoform 2                      | 0  | 5   | 0   |
| 20070390  | Spg21         | spastic paraplegia 21 homolog                           | 0  | 1   | 0   |
| 244790112 | Spast         | spastin isoform 2                                       | 0  | 1   | 0   |
| 20982839  | Satb2         | special AT-rich sequence binding protein 2              | 0  | 1   | 0   |
| 260267630 | Spopl         | speckle-type POZ protein-like                           | 1  | 0   | 0   |
| 19526481  | Spna1         | spectrin alpha 1                                        | 1  | 1   | 1   |
| 295054271 | Spna2         | spectrin alpha 2                                        | 33 | 163 | 114 |
| 117938334 | Spnb2         | spectrin beta 2 isoform 1                               | 8  | 103 | 70  |
| 55926127  | Spnb3         | spectrin beta 3                                         | 15 | 108 | 85  |
| 312839864 | Spnb4         | spectrin beta 4                                         | 0  | 4   | 2   |
| 116089351 | Abi1          | spectrin SH3 domain binding protein 1 isoform 1         | 1  | 2   | 0   |
| 291042652 | Speg          | SPEG complex locus isoform 1                            | 0  | 2   | 1   |
| 120587001 | Spn           | SPEN homolog, transcriptional regulator                 | 0  | 6   | 1   |
| 21312846  | Spaca1        | sperm acrosome associated 1                             | 1  | 0   | 0   |
| 148747279 | Spag1         | sperm associated antigen 1                              | 1  | 2   | 0   |
| 70887774  | Spag16        | sperm associated antigen 16 isoform 1                   | 0  | 1   | 0   |
| 162287182 | Spag17        | sperm associated antigen 17                             | 1  | 0   | 0   |
| 110625792 | Spef1         | sperm flagellar 1                                       | 1  | 0   | 0   |
| 194473671 | Ssfa2         | sperm specific antigen 2                                | 0  | 1   | 1   |
| 124001554 | Catsper2      | sperm-associated cation channel 2                       | 1  | 0   | 0   |
| 114842377 | Strbp         | spermatid perinuclear RNA-binding protein               | 1  | 26  | 0   |
| 29648322  | Dnajb13       | spermatogenesis apoptosis-related protein               | 0  | 1   | 0   |
| 21311949  | Spata1        | spermatogenesis associated 1                            | 1  | 0   | 0   |
| 21313470  | Alkbh7        | spermatogenesis associated 11                           | 2  | 0   | 0   |
| 161086959 | Speer3        | spermatogenesis associated glutamate (E)-rich protein 3 | 0  | 1   | 1   |
| 20982833  | Spats2        | spermatogenesis associated, serine-rich 2               | 0  | 0   | 1   |
| 158854016 | Skp1a         | S-phase kinase-associated protein 1A                    | 1  | 7   | 2   |
| 257196247 | Smpd4         | sphingomyelin phosphodiesterase 4                       | 0  | 0   | 11  |
| 19527104  | Smpdl3b       | sphingomyelin phosphodiesterase, acid-like 3B           | 0  | 0   | 1   |
| 270483850 | Sgms1         | sphingomyelin synthase 1                                | 0  | 0   | 1   |
| 170014712 | Sphkap        | sphingosine kinase type 1-interacting protein           | 0  | 0   | 1   |
| 31543694  | Sgpl1         | sphingosine-1-phosphate lyase 1                         | 5  | 2   | 3   |
| 13507712  | Sgpp1         | sphingosine-1-phosphate phosphatase 1                   | 1  | 0   | 0   |
| 21312862  | Spc24         | spindle pole body component 24 homolog                  | 0  | 1   | 0   |
| 30520207  | Spin4         | spindlin family, member 4                               | 1  | 0   | 0   |
| 22165378  | Spin1         | spindlin isoform 2                                      | 0  | 2   | 2   |
| 160707947 | Sf1           | splicing factor 1 isoform 2                             | 1  | 9   | 2   |
| 165932270 | Sf3a1         | splicing factor 3a, subunit 1                           | 11 | 25  | 19  |
| 158749553 | Sf3a2         | splicing factor 3a, subunit 2                           | 1  | 8   | 2   |
| 22095003  | Sf3a3         | splicing factor 3a, subunit 3                           | 1  | 23  | 15  |
| 13384692  | 0610009D07Rik | splicing factor 3B, 14 kDa subunit                      | 1  | 4   | 3   |
| 153791358 | Sf3b1         | splicing factor 3b, subunit 1                           | 4  | 39  | 35  |

|           |               |                                                                                          |    |    |    |
|-----------|---------------|------------------------------------------------------------------------------------------|----|----|----|
| 268837785 | Sf3b2         | splicing factor 3b, subunit 2                                                            | 3  | 19 | 28 |
| 19527174  | Sf3b3         | splicing factor 3b, subunit 3                                                            | 13 | 45 | 38 |
| 23346437  | Sf3b4         | splicing factor 3b, subunit 4                                                            | 1  | 5  | 6  |
| 85540445  | Sf3b5         | splicing factor 3b, subunit 5                                                            | 1  | 3  | 2  |
| 28076967  | Sf4           | splicing factor 4                                                                        | 1  | 1  | 2  |
| 23956214  | Sfpq          | splicing factor proline/glutamine rich (polypyrimidine tract binding protein associated) | 12 | 29 | 10 |
| 13385016  | Sfrs9         | splicing factor, arginine/serine rich 9                                                  | 0  | 4  | 10 |
| 118582271 | Sfrs1         | splicing factor, arginine/serine-rich 1 isoform 1                                        | 10 | 12 | 11 |
| 6677975   | Tra2b         | splicing factor, arginine/serine-rich 10                                                 | 3  | 5  | 8  |
| 148222073 | Sfrs11        | splicing factor, arginine/serine-rich 11 isoform 2                                       | 0  | 5  | 0  |
| 27369842  | Sfrs12        | splicing factor, arginine/serine-rich 12                                                 | 0  | 3  | 0  |
| 109150409 | Sfrs15        | splicing factor, arginine/serine-rich 15                                                 | 0  | 8  | 1  |
| 6755478   | Sfrs2         | splicing factor, arginine/serine-rich 2                                                  | 2  | 2  | 1  |
| 117647277 | Sfrs2ip       | splicing factor, arginine/serine-rich 2, interacting protein                             | 0  | 16 | 6  |
| 8567402   | Sfrs3         | splicing factor, arginine/serine-rich 3 (SRp20)                                          | 2  | 8  | 8  |
| 165377173 | Sfrs4         | splicing factor, arginine/serine-rich 4                                                  | 1  | 0  | 1  |
| 119226243 | Sfrs5         | splicing factor, arginine/serine-rich 5                                                  | 7  | 6  | 5  |
| 306774103 | Sfrs7         | splicing factor, arginine/serine-rich 7                                                  | 2  | 4  | 6  |
| 78217391  | Sfrs8         | splicing factor, arginine/serine-rich 8                                                  | 0  | 5  | 0  |
| 6755650   | Spry1         | sprouty homolog 1                                                                        | 0  | 1  | 0  |
| 15743554  | Spred1        | sprouty-related protein 1 with EVH-1 domain                                              | 1  | 0  | 0  |
| 124244096 | Sart1         | squamous cell carcinoma antigen recognized by T-cells 1                                  | 10 | 23 | 2  |
| 8394239   | Sart3         | squamous cell carcinoma antigen recognized by T-cells 3                                  | 4  | 0  | 0  |
| 283046784 | 1810035L17Rik | SRA stem-loop-interacting RNA-binding protein                                            | 3  | 2  | 0  |
| 13384678  | Med21         | SRB7 (suppressor of RNA polymerase B) homolog                                            | 0  | 2  | 0  |
| 164698470 | Shc3          | src homology 2 domain-containing transforming protein C3                                 | 0  | 0  | 1  |
| 156938293 | Scap          | SREBF chaperone                                                                          | 0  | 0  | 1  |
| 119672912 | Cherp         | SR-related CTD associated factor 6                                                       | 0  | 1  | 3  |
| 117606322 | Sox1          | SRY (sex determining region Y)-box 1                                                     | 1  | 0  | 0  |
| 31543703  | St3gal4       | ST3 beta-galactoside alpha-2,3-sialyltransferase 4                                       | 0  | 0  | 1  |
| 55742879  | Stambpl1      | STAM binding protein-like 1                                                              | 1  | 0  | 0  |
| 77404392  | Snd1          | staphylococcal nuclease domain containing 1                                              | 30 | 22 | 0  |
| 9910482   | Stard10       | START domain containing 10                                                               | 1  | 0  | 0  |
| 149249975 | Stard9        | START domain containing 9                                                                | 1  | 0  | 1  |
| 21312812  | Stard6        | START domain containing protein 6                                                        | 1  | 0  | 0  |
| 9789995   | Stmn1         | stathmin 1                                                                               | 1  | 0  | 0  |
| 13384630  | Stmn2         | stathmin-like 2                                                                          | 1  | 0  | 1  |
| 158186641 | Stau1         | staufen (RNA binding protein) homolog 1 isoform 3                                        | 2  | 1  | 0  |
| 120300985 | Strc          | stereocilin                                                                              | 1  | 0  | 0  |
| 226958514 | Samd9l        | sterile alpha motif domain containing 9-like isoform 1                                   | 3  | 20 | 2  |
| 27881427  | Srd5a3        | steroid 5 alpha-reductase 3                                                              | 1  | 0  | 0  |
| 87044895  | Srd5a1        | steroid-5-alpha-reductase 1                                                              | 1  | 0  | 1  |
| 110625752 | Ccdc80        | steroid-sensitive protein 1                                                              | 1  | 0  | 0  |
| 45476581  | Scp2          | sterol carrier protein 2, liver                                                          | 10 | 1  | 0  |
| 84619697  | Soat1         | sterol O-acyltransferase 1                                                               | 4  | 0  | 6  |
| 9789907   | Stub1         | STIP1 homology and U-box containing protein 1                                            | 1  | 1  | 0  |
| 7710018   | Stom          | stomatin                                                                                 | 1  | 0  | 0  |
| 12963591  | Stoml2        | stomatin-like protein 2                                                                  | 7  | 0  | 4  |
| 159032010 | Ston1         | stonin 1                                                                                 | 2  | 0  | 0  |
| 198278492 | Stox1         | storkhead box 1                                                                          | 0  | 0  | 1  |

|           |          |                                                                       |    |    |    |
|-----------|----------|-----------------------------------------------------------------------|----|----|----|
| 134023662 | Sfn      | stratifin                                                             | 5  | 0  | 0  |
| 34556193  | Sbno2    | strawberry notch homolog                                              | 0  | 0  | 1  |
| 14389431  | Stip1    | stress-induced phosphoprotein 1                                       | 32 | 5  | 0  |
| 30425194  | Abra     | striated muscle activator of Rho-dependent signaling                  | 0  | 0  | 1  |
| 61098078  | Strn     | striatin, calmodulin binding protein                                  | 4  | 0  | 0  |
| 40254610  | Stag1    | stromal antigen 1                                                     | 0  | 2  | 4  |
| 118150674 | Stag2    | stromal antigen 2                                                     | 0  | 24 | 7  |
| 226958306 | Sdf2     | stromal cell derived factor 2                                         | 1  | 1  | 0  |
| 11612505  | Sdf2l1   | stromal cell-derived factor 2-like 1                                  | 2  | 3  | 0  |
| 281182368 | Stim2    | stromal interaction molecule 2                                        | 2  | 0  | 1  |
| 62990166  | Smc2     | structural maintenance of chromosomes 2                               | 1  | 12 | 0  |
| 29789347  | Smc4     | structural maintenance of chromosomes 4                               | 0  | 7  | 1  |
| 24497433  | Smc5     | structural maintenance of chromosomes 5                               | 1  | 8  | 6  |
| 209862973 | Ssrp1    | structure specific recognition protein 1 isoform 1                    | 3  | 16 | 11 |
| 39204645  | Smgc     | submandibular gland protein C                                         | 1  | 0  | 0  |
| 14389425  | Smr3a    | submaxillary gland androgen regulated protein 1                       | 1  | 0  | 0  |
| 110815822 | Sdhaf1   | succinate dehydrogenase complex assembly factor 1                     | 1  | 1  | 0  |
| 34328286  | Sdhb     | succinate dehydrogenase complex, subunit B, iron sulfur (lp)          | 9  | 0  | 6  |
| 228008307 | Sdhc     | succinate dehydrogenase complex, subunit C, integral membrane protein | 3  | 0  | 0  |
| 54607098  | Sdha     | succinate dehydrogenase Fp subunit                                    | 24 | 1  | 3  |
| 255958286 | Suc1g1   | succinate-CoA ligase, GDP-forming alpha subunit                       | 9  | 0  | 2  |
| 165972309 | Suc1g2   | succinate-CoA ligase, GDP-forming beta subunit                        | 19 | 1  | 3  |
| 46849708  | Suca2    | succinate-Coenzyme A ligase, ADP-forming, beta subunit                | 12 | 0  | 1  |
| 244790049 | Sqr1     | sulfide quinone reductase-like                                        | 10 | 2  | 11 |
| 188219649 | Sult1d1  | sulfotransferase family 1D, member 1                                  | 11 | 0  | 14 |
| 254939663 | Senp3    | SUMO/sentrin specific peptidase 3                                     | 1  | 0  | 0  |
| 159032027 | Senp5    | SUMO/sentrin specific peptidase 5                                     | 2  | 0  | 0  |
| 46560561  | Senp6    | SUMO/sentrin specific protease 6                                      | 0  | 1  | 1  |
| 9790247   | Sae1     | SUMO1 activating enzyme subunit 1                                     | 3  | 0  | 1  |
| 159032049 | AF366264 | SUMO-1 specific protease 4                                            | 0  | 0  | 1  |
| 51593105  | Senp7    | SUMO1/sentrin specific protease 7 isoform 2                           | 0  | 1  | 8  |
| 21312352  | Skiv2l2  | superkiller viralicidic activity 2-like 2                             | 5  | 30 | 4  |
| 45597447  | Sod1     | superoxide dismutase 1, soluble                                       | 4  | 0  | 0  |
| 31980762  | Sod2     | superoxide dismutase 2, mitochondrial                                 | 9  | 3  | 0  |
| 23346601  | Svil     | supervillin isoform 1                                                 | 0  | 1  | 3  |
| 19526912  | St13     | suppression of tumorigenicity 13                                      | 8  | 0  | 0  |
| 35215307  | St18     | suppression of tumorigenicity 18                                      | 1  | 0  | 0  |
| 6677983   | Clpb     | suppressor of K+ transport defect 3                                   | 1  | 0  | 0  |
| 154350222 | Supt16h  | suppressor of Ty 16 homolog                                           | 5  | 39 | 16 |
| 6678181   | Supt4h1  | suppressor of Ty 4 homolog 1                                          | 0  | 1  | 0  |
| 22094123  | Supt5h   | suppressor of Ty 5 homolog                                            | 1  | 26 | 2  |
| 166091434 | Supt6h   | suppressor of Ty 6 homolog                                            | 0  | 26 | 9  |
| 31088872  | Supv3l1  | suppressor of var1, 3-like 1                                          | 1  | 0  | 1  |
| 6755702   | Suv39h1  | suppressor of variegation 3-9 homolog 1                               | 0  | 0  | 1  |
| 268607629 | Suv420h1 | suppressor of variegation 4-20 homolog 1                              | 0  | 0  | 1  |
| 253314523 | Suz12    | suppressor of zeste 12 homolog isoform 1                              | 0  | 5  | 0  |
| 160707899 | Surf1    | surfeit 1                                                             | 1  | 0  | 0  |
| 6755698   | Surf4    | surfeit gene 4                                                        | 1  | 0  | 0  |
| 76781479  | Med22    | surfeit gene 5 isoform 2                                              | 0  | 2  | 0  |
| 6678185   | Surf6    | surfeit gene 6                                                        | 0  | 0  | 2  |
| 27369569  | Smndc1   | survival motor neuron domain containing 1                             | 0  | 5  | 0  |



|           |          |                                                                                                             |     |    |     |
|-----------|----------|-------------------------------------------------------------------------------------------------------------|-----|----|-----|
| 153791169 | Sned1    | sushi, nidogen and EGF-like domains 1                                                                       | 0   | 1  | 0   |
| 140971050 | Srpx2    | sushi-repeat containing protein                                                                             | 0   | 0  | 1   |
| 8394362   | Srpx     | sushi-repeat-containing protein, X-chromosome                                                               | 0   | 0  | 1   |
| 13385536  | Armc10   | SVH protein                                                                                                 | 9   | 0  | 8   |
| 13994192  | Tas1r1   | sweet taste receptor T1r                                                                                    | 0   | 1  | 0   |
| 229577278 | Smarcal1 | SWI/SNF related matrix associated, actin dependent regulator of chromatin, subfamily a-like 1               | 1   | 1  | 1   |
| 21313112  | Smarca2  | SWI/SNF related, matrix associated, actin dependent regulator of chromatin, subfamily a, member 2 isoform 1 | 0   | 1  | 2   |
| 67763824  | Hltf     | SWI/SNF related, matrix associated, actin dependent regulator of chromatin, subfamily a, member 3 isoform 2 | 0   | 0  | 1   |
| 40254124  | Smarca5  | SWI/SNF related, matrix associated, actin dependent regulator of chromatin, subfamily a, member 5           | 0   | 50 | 39  |
| 240255565 | Smarcb1  | SWI/SNF related, matrix associated, actin dependent regulator of chromatin, subfamily b, member 1 isoform 1 | 0   | 7  | 1   |
| 112421097 | Smarcc1  | SWI/SNF related, matrix associated, actin dependent regulator of chromatin, subfamily c, member 1           | 0   | 21 | 7   |
| 125347396 | Smarcd1  | SWI/SNF related, matrix associated, actin dependent regulator of chromatin, subfamily d, member 1           | 0   | 13 | 0   |
| 194328773 | Smarcd2  | SWI/SNF related, matrix associated, actin dependent regulator of chromatin, subfamily d, member 2 isoform 2 | 0   | 12 | 2   |
| 10181166  | Smarce1  | SWI/SNF related, matrix associated, actin dependent regulator of chromatin, subfamily e, member 1           | 0   | 10 | 3   |
| 291463271 | Smarca4  | SWI/SNF-related matrix-associated actin-dependent regulator of chromatin a4                                 | 1   | 38 | 20  |
| 166235125 | Smarcc2  | SWI/SNF-related matrix-associated actin-dependent regulator of chromatin c2 isoform 2                       | 1   | 34 | 12  |
| 226437613 | Sympk    | symplekin                                                                                                   | 0   | 16 | 4   |
| 295293127 | Dlg3     | synapse-associated protein 102                                                                              | 1   | 3  | 0   |
| 119120865 | Syne1    | synaptic nuclear envelope 1 isoform 2                                                                       | 4   | 2  | 2   |
| 145699091 | Syne2    | synaptic nuclear envelope 2                                                                                 | 214 | 68 | 229 |
| 21312776  | Tprgl    | synaptic vesicle associated protein of 30 kD                                                                | 2   | 0  | 0   |
| 7106429   | Syng2    | synaptogyrin 2                                                                                              | 1   | 0  | 1   |
| 13384642  | Synj2bp  | synaptojanin 2 binding protein                                                                              | 5   | 0  | 0   |
| 158303337 | Synpo    | synaptopodin isoform A                                                                                      | 0   | 0  | 2   |
| 295317330 | Snap23   | synaptosomal-associated protein 23                                                                          | 7   | 0  | 1   |
| 6755588   | Snap25   | synaptosomal-associated protein 25                                                                          | 1   | 0  | 1   |
| 7305507   | Snap91   | synaptosomal-associated protein 91                                                                          | 1   | 1  | 1   |
| 70906485  | Syt6     | synaptotagmin 6                                                                                             | 0   | 0  | 1   |
| 29788787  | Syncrip  | synaptotagmin binding, cytoplasmic RNA interacting protein isoform 1                                        | 11  | 19 | 1   |
| 225637529 | Syt15    | synaptotagmin XV isoform a                                                                                  | 0   | 0  | 1   |
| 7305099   | Syt14    | synaptotagmin-like 4                                                                                        | 1   | 1  | 0   |
| 6755438   | Sdc1     | syndecan 1                                                                                                  | 1   | 0  | 1   |
| 6755442   | Sdc4     | syndecan 4                                                                                                  | 2   | 0  | 2   |
| 148277640 | Sdcbp    | syndecan binding protein isoform 2                                                                          | 1   | 0  | 0   |
| 13385314  | Nudt16l1 | syndesmos                                                                                                   | 0   | 12 | 3   |
| 16716495  | Ric8     | synembryn                                                                                                   | 0   | 1  | 0   |
| 258547104 | Synv1    | synovial apoptosis inhibitor 1, synoviolin                                                                  | 3   | 0  | 0   |
| 19527102  | Stx12    | syntaxin 12                                                                                                 | 5   | 0  | 0   |
| 156231059 | Stx16    | syntaxin 16 isoform d                                                                                       | 2   | 0  | 2   |
| 84579893  | Stx17    | syntaxin 17                                                                                                 | 1   | 0  | 0   |
| 15011853  | Stx1a    | syntaxin 1A (brain)                                                                                         | 0   | 1  | 0   |
| 70778911  | Stx3     | syntaxin 3 isoform A                                                                                        | 0   | 0  | 1   |
| 6678177   | Stx4a    | syntaxin 4A (placental)                                                                                     | 5   | 0  | 1   |

|           |          |                                                                                  |    |    |    |
|-----------|----------|----------------------------------------------------------------------------------|----|----|----|
| 268370185 | Stx5a    | syntaxin 5                                                                       | 2  | 0  | 0  |
| 31560462  | Stx7     | syntaxin 7                                                                       | 5  | 0  | 0  |
| 9055356   | Stx8     | syntaxin 8                                                                       | 1  | 0  | 0  |
| 165972307 | Stxbp1   | syntaxin binding protein 1 isoform b                                             | 0  | 0  | 1  |
| 6755688   | Stxbp2   | syntaxin binding protein 2                                                       | 12 | 0  | 0  |
| 6755690   | Stxbp3a  | syntaxin binding protein 3                                                       | 2  | 2  | 0  |
| 6755692   | Stxbp4   | syntaxin binding protein 4                                                       | 1  | 0  | 0  |
| 158749547 | Stxbp5   | syntaxin binding protein 5 (tomosyn)                                             | 1  | 0  | 0  |
| 160333722 | Snta1    | syntrophin, acidic 1                                                             | 0  | 0  | 2  |
| 6678059   | Sntb2    | syntrophin, basic 2                                                              | 0  | 1  | 1  |
| 31560093  | Sntg1    | syntrophin, gamma 1                                                              | 0  | 0  | 1  |
| 269973907 | Sntg2    | syntrophin, gamma 2                                                              | 0  | 1  | 0  |
| 258613887 | Tacr2    | tachykinin receptor 2                                                            | 0  | 0  | 1  |
| 124486596 | Taf1     | TAF1 RNA polymerase II, TATA box binding protein (TBP)-associated factor         | 0  | 3  | 1  |
| 46518499  | Taf10    | TAF10 RNA polymerase II, TATA box binding protein (TBP)-associated factor        | 0  | 1  | 0  |
| 30794436  | Taf11    | TAF11 RNA polymerase II, TATA box binding protein (TBP)-associated factor        | 0  | 2  | 0  |
| 227330588 | Taf12    | TAF12 RNA polymerase II, TATA box binding protein (TBP)-associated factor        | 0  | 3  | 0  |
| 30794412  | Taf15    | TAF15 RNA polymerase II, TATA box binding protein (TBP)-associated factor        | 2  | 2  | 2  |
| 124487354 | Taf4a    | TAF4A RNA polymerase II, TATA box binding protein (TBP)-associated factor        | 0  | 5  | 0  |
| 6678215   | Taf6     | TAF6 RNA polymerase II, TATA box binding protein (TBP)-associated factor         | 0  | 15 | 0  |
| 295317365 | Taf6l    | TAF6-like RNA polymerase II, p300/CBP-associated factor (PCAF)-associated factor | 0  | 1  | 0  |
| 62821772  | Taf9     | TAF9 RNA polymerase II, TATA box binding protein-associated factor isoform 1     | 0  | 3  | 0  |
| 269784727 | Taf9b    | TAF9-like RNA polymerase II, TATA box binding protein (TBP)-associated factor    | 0  | 4  | 0  |
| 227116327 | Tln1     | talin 1                                                                          | 13 | 27 | 6  |
| 163310736 | Tln2     | talin 2                                                                          | 0  | 3  | 0  |
| 124486923 | Tnks1bp1 | tankyrase 1 binding protein 1                                                    | 1  | 2  | 0  |
| 87239974  | Tnks     | tankyrase, TRF1-interacting ankyrin-related ADP-ribose polymerase                | 0  | 1  | 0  |
| 124358959 | Taok1    | TAO kinase 1                                                                     | 0  | 0  | 1  |
| 314122205 | Taok3    | TAO kinase 3                                                                     | 0  | 1  | 0  |
| 56682935  | Tardbp   | TAR DNA binding protein isoform 1                                                | 1  | 14 | 14 |
| 210147426 | Tom1     | target of myb1 homolog isoform 1                                                 | 0  | 0  | 2  |
| 84875524  | Tom1l2   | target of myb1-like 2 isoform a                                                  | 0  | 2  | 0  |
| 46309605  | Tas2r125 | taste receptor, type 2, member 125                                               | 0  | 1  | 0  |
| 31044479  | Tas2r139 | taste receptor, type 2, member 139                                               | 0  | 0  | 1  |
| 172073171 | Tbp      | TATA box binding protein                                                         | 0  | 2  | 2  |
| 20270192  | Taf13    | TATA box-binding protein-associated factor, RNA polymerase II, K, 18kD           | 0  | 2  | 0  |
| 124487429 | Tmf1     | TATA element modulatory factor 1                                                 | 1  | 0  | 0  |
| 21313140  | Tax1bp3  | Tax1 binding protein 3                                                           | 1  | 1  | 0  |
| 91598586  | Txlna    | taxilin alpha                                                                    | 2  | 2  | 0  |
| 120587003 | Tbc1d1   | TBC1 domain family, member 1                                                     | 1  | 0  | 1  |
| 29789165  | Tbc1d20  | TBC1 domain family, member 20                                                    | 1  | 0  | 0  |
| 255522831 | Tbc1d24  | TBC1 domain family, member 24 isoform b                                          | 0  | 0  | 1  |
| 163644270 | Tbc1d4   | TBC1 domain family, member 4                                                     | 1  | 0  | 0  |

|           |         |                                                           |    |    |    |
|-----------|---------|-----------------------------------------------------------|----|----|----|
| 224809347 | Tbc1d8  | TBC1 domain family, member 8                              | 1  | 0  | 0  |
| 162329599 | Tbc1d9  | TBC1 domain family, member 9 isoform 1                    | 1  | 0  | 1  |
| 145587102 | Tbccd1  | TBCC domain containing 1                                  | 1  | 0  | 0  |
| 14030783  | Tbx19   | T-box 19                                                  | 0  | 0  | 1  |
| 38327623  | Tbx3    | T-box 3 protein isoform 2                                 | 1  | 0  | 0  |
| 156938285 | Tbx4    | T-box 4 isoform a                                         | 0  | 1  | 0  |
| 124486849 | Taf2    | TBP-associated factor 2                                   | 0  | 8  | 0  |
| 110665722 | Taf5    | Tbp-associated factor 5                                   | 1  | 11 | 0  |
| 189409138 | Cand1   | TBP-interacting protein                                   | 25 | 20 | 3  |
| 7305561   | Tcl1b5  | T-cell leukemia/lymphoma 1B, 5                            | 1  | 0  | 1  |
| 225543229 | Tiam1   | T-cell lymphoma invasion and metastasis 1 isoform 1       | 0  | 1  | 1  |
| 268370151 | Tcirg1  | T-cell, immune regulator 1 isoform 2                      | 0  | 0  | 3  |
| 110625624 | Tcp1    | t-complex protein 1                                       | 27 | 11 | 2  |
| 225735589 | Tdpoz1  | TD and POZ domain containing 1                            | 0  | 1  | 0  |
| 6678275   | Tead1   | TEA domain family member 1                                | 0  | 1  | 0  |
| 7106433   | Tead2   | TEA domain family member 2                                | 0  | 3  | 0  |
| 196049389 | Tead3   | TEA domain family member 3 isoform 2                      | 0  | 2  | 0  |
| 164698396 | Tec     | tec protein tyrosine kinase isoform a                     | 0  | 1  | 0  |
| 31541975  | Tctn3   | tectonic family member 3                                  | 1  | 0  | 0  |
| 124249058 | Tecpr1  | tectonin beta-propeller repeat containing 1               | 0  | 1  | 0  |
| 239787867 | Tecta   | tectorin alpha                                            | 0  | 0  | 1  |
| 148225693 | Tekt2   | tektin 2                                                  | 0  | 0  | 1  |
| 255683441 | Telo2   | TEL2, telomere maintenance 2, homolog                     | 0  | 0  | 1  |
| 6678285   | Tep1    | telomerase associated protein 1                           | 0  | 0  | 1  |
| 146231944 | Rif1    | telomere-associated protein RIF1                          | 0  | 4  | 10 |
| 133904142 | Terf2   | telomeric repeat binding factor 2 isoform 1               | 1  | 2  | 0  |
| 160948575 | Terf2ip | telomeric repeat binding factor 2, interacting protein    | 1  | 12 | 0  |
| 320461717 | Tnxb    | tenascin XB                                               | 0  | 1  | 0  |
| 134152676 | Tns3    | tensin 3                                                  | 1  | 2  | 1  |
| 238624158 | Tns4    | tensin 4                                                  | 1  | 1  | 0  |
| 19526976  | Dnttip1 | terminal deoxynucleotidyltransferase interacting factor 1 | 0  | 5  | 0  |
| 31981922  | Tsp50   | testes-specific protease 50                               | 0  | 0  | 1  |
| 46395466  | Tes     | testis derived transcript                                 | 1  | 0  | 1  |
| 329299050 | Dcun1d1 | testis derived transcript 3                               | 0  | 3  | 0  |
| 124249335 | Tex10   | testis expressed gene 10                                  | 0  | 2  | 2  |
| 118722338 | Tex15   | testis expressed gene 15                                  | 0  | 2  | 0  |
| 115299741 | Tex16   | testis expressed gene 16                                  | 1  | 0  | 0  |
| 61888894  | Tex24   | testis expressed gene 24                                  | 0  | 1  | 0  |
| 126090463 | Tex264  | testis expressed gene 264                                 | 1  | 0  | 0  |
| 46402207  | Tsga10  | testis specific 10                                        | 0  | 1  | 0  |
| 225543141 | Tesk2   | testis-specific kinase 2                                  | 0  | 1  | 0  |
| 6678445   | Tsyp1   | testis-specific protein, Y-encoded-like 1                 | 0  | 0  | 1  |
| 157057152 | Tet2    | tet oncogene family member 2                              | 1  | 0  | 0  |
| 22122345  | Tspan14 | tetraspanin 14                                            | 1  | 0  | 0  |
| 13385482  | Tspan31 | tetraspanin 31                                            | 1  | 0  | 0  |
| 16716365  | Tspan4  | tetraspanin 4                                             | 1  | 0  | 0  |
| 274316334 | Tspan8  | tetraspanin 8                                             | 5  | 0  | 0  |
| 253735731 | Fis1    | tetratricopeptide repeat domain 11 isoform 1              | 4  | 0  | 0  |
| 238637273 | Ttc15   | tetratricopeptide repeat domain 15 isoform 1              | 1  | 0  | 0  |
| 295444831 | Ttc19   | tetratricopeptide repeat domain 19 isoform 1              | 0  | 1  | 0  |
| 114158711 | Ttc21b  | tetratricopeptide repeat domain 21B                       | 0  | 1  | 0  |
| 42734471  | Ttc26   | tetratricopeptide repeat domain 26                        | 0  | 0  | 1  |
| 164519039 | Ttc27   | tetratricopeptide repeat domain 27                        | 0  | 1  | 0  |

|           |               |                                                          |    |    |    |
|-----------|---------------|----------------------------------------------------------|----|----|----|
| 225543265 | B230396O12Rik | tetratricopeptide repeat domain 34                       | 1  | 0  | 0  |
| 13385196  | Ttc35         | tetratricopeptide repeat domain 35                       | 4  | 0  | 2  |
| 124486883 | Ttc37         | tetratricopeptide repeat domain 37                       | 2  | 0  | 0  |
| 285026483 | Ttc4          | tetratricopeptide repeat domain 4                        | 0  | 0  | 1  |
| 226494680 | Ttc7b         | tetratricopeptide repeat domain 7B                       | 1  | 0  | 1  |
| 110625776 | Ttc9c         | tetratricopeptide repeat domain 9C                       | 0  | 2  | 0  |
| 239915965 | lft88         | Tg737 protein                                            | 1  | 0  | 0  |
| 148540168 | 5730427N09Rik | TGF beta-inducible nuclear protein 1                     | 0  | 0  | 2  |
| 91982765  | Th1l          | TH1 homolog                                              | 0  | 1  | 0  |
| 7305589   | Tpk1          | thiamin pyrophosphokinase 1                              | 1  | 0  | 0  |
| 239916005 | Thop1         | thimet oligopeptidase 1                                  | 11 | 0  | 0  |
| 6755911   | Txn1          | thioredoxin 1                                            | 6  | 4  | 1  |
| 9903609   | Txn2          | thioredoxin 2                                            | 3  | 0  | 0  |
| 117606385 | Tmx3          | thioredoxin domain containing 10                         | 5  | 0  | 0  |
| 13384700  | Txndc12       | thioredoxin domain containing 12                         | 1  | 0  | 0  |
| 52693935  | Txndc15       | thioredoxin domain containing 15                         | 1  | 0  | 0  |
| 13386060  | Txndc17       | thioredoxin domain containing 17                         | 2  | 0  | 0  |
| 19072792  | Erp44         | thioredoxin domain containing 4                          | 7  | 0  | 0  |
| 83921612  | Txndc5        | thioredoxin domain containing 5                          | 3  | 1  | 1  |
| 158854007 | 1110049F12Rik | thioredoxin family Trp26                                 | 1  | 0  | 0  |
| 110224447 | Txnrd1        | thioredoxin reductase 1 isoform 2                        | 9  | 1  | 0  |
| 102468565 | Txnrd2        | thioredoxin reductase 2 precursor                        | 2  | 0  | 0  |
| 31543902  | Txnl1         | thioredoxin-like 1                                       | 7  | 0  | 0  |
| 109255214 | Txnl4a        | thioredoxin-like 4 isoform b                             | 0  | 1  | 0  |
| 33859722  | Tmx1          | thioredoxin-related transmembrane protein 1              | 2  | 0  | 0  |
| 21313210  | Txndc14       | thioredoxin-related transmembrane protein 2              | 3  | 0  | 2  |
| 112817607 | Tmx4          | thioredoxin-related transmembrane protein 4              | 1  | 0  | 4  |
| 6678449   | Tst           | thiosulfate sulfurtransferase                            | 1  | 0  | 0  |
| 23956332  | Thoc1         | THO complex 1                                            | 0  | 20 | 0  |
| 254553424 | Thoc3         | THO complex 3                                            | 0  | 7  | 0  |
| 6755763   | Thoc4         | THO complex 4                                            | 3  | 11 | 7  |
| 27369587  | Thoc5         | THO complex 5                                            | 1  | 21 | 0  |
| 125656163 | Thoc2         | THO complex subunit 2                                    | 0  | 35 | 0  |
| 27229277  | Tars          | threonyl-tRNA synthetase                                 | 2  | 17 | 0  |
| 254692873 | Tars2         | threonyl-tRNA synthetase 2, mitochondrial isoform 1      | 0  | 11 | 0  |
| 21704176  | Thumpd1       | THUMP domain containing 1                                | 1  | 0  | 0  |
| 226958341 | Tk1           | thymidine kinase 1                                       | 0  | 0  | 1  |
| 225543134 | Tk2           | thymidine kinase 2, mitochondrial                        | 1  | 0  | 0  |
| 166706901 | Tdg           | thymine DNA glycosylase isoform 2                        | 0  | 1  | 0  |
| 21362343  | Thyn1         | thymocyte protein Thy28                                  | 0  | 1  | 0  |
| 121949779 | Tmpo          | thymopoietin isoform zeta                                | 7  | 46 | 35 |
| 124430576 | Tg            | thyroglobulin                                            | 1  | 0  | 0  |
| 241982820 | Thada         | thyroid adenoma associated                               | 0  | 0  | 1  |
| 146134449 | Med13l        | thyroid hormone receptor associated protein 2            | 0  | 1  | 0  |
| 68533246  | Thrap3        | thyroid hormone receptor associated protein 3            | 5  | 3  | 7  |
| 6678343   | Thrb          | thyroid hormone receptor beta isoform 1                  | 0  | 0  | 1  |
| 334724453 | Trip10        | thyroid hormone receptor interactor 10                   | 6  | 10 | 0  |
| 226531227 | Trip11        | thyroid hormone receptor interactor 11 isoform 3         | 3  | 1  | 0  |
| 91932791  | Trip12        | thyroid hormone receptor interactor 12                   | 0  | 7  | 6  |
| 164664516 | Tshr          | thyroid stimulating hormone receptor isoform 1 precursor | 2  | 0  | 0  |
| 7305593   | Trhr          | thyrotropin releasing hormone receptor                   | 0  | 0  | 1  |
| 18875348  | Trhr2         | thyrotropin releasing hormone receptor 2                 | 1  | 0  | 0  |

|           |          |                                                               |    |    |    |
|-----------|----------|---------------------------------------------------------------|----|----|----|
| 6678349   | Tial1    | Tial1 cytotoxic granule-associated RNA binding protein-like 1 | 0  | 3  | 0  |
| 124487251 | Tigd2    | tigger transposable element derived 2 homolog                 | 0  | 0  | 1  |
| 254675279 | Tjp1     | tight junction protein 1 isoform 1                            | 2  | 17 | 22 |
| 312222765 | Tjp2     | tight junction protein 2                                      | 16 | 9  | 9  |
| 114052811 | Tjp3     | tight junction protein 3                                      | 3  | 8  | 11 |
| 255760017 | Timeless | timeless homolog isoform 2                                    | 0  | 1  | 1  |
| 21313608  | Tipin    | timeless interacting protein                                  | 1  | 0  | 0  |
| 110625888 | Timp4    | tissue inhibitor of metalloproteinase 4                       | 1  | 0  | 0  |
| 13654268  | Tsta3    | tissue specific transplantation antigen P35B                  | 1  | 0  | 0  |
| 77812699  | Ttn      | titin isoform N2-A                                            | 3  | 6  | 10 |
| 21539617  | Tlcd1    | TLC domain containing 1                                       | 1  | 0  | 0  |
| 13385998  | Trap1    | TNF receptor-associated protein 1                             | 26 | 0  | 2  |
| 75677522  | Tradd    | TNFRSF1A-associated via death domain                          | 0  | 0  | 1  |
| 13507603  | Tlr1     | toll-like receptor 1                                          | 0  | 0  | 1  |
| 45430001  | Tlr12    | toll-like receptor 12                                         | 0  | 1  | 0  |
| 153945749 | Top2a    | topoisomerase (DNA) II alpha                                  | 0  | 29 | 1  |
| 34328148  | Top2b    | topoisomerase (DNA) II beta                                   | 0  | 67 | 30 |
| 31559817  | Topbp1   | topoisomerase (DNA) II binding protein 1                      | 1  | 0  | 0  |
| 6678403   | Top3a    | topoisomerase (DNA) III alpha                                 | 1  | 1  | 0  |
| 6755851   | Top3b    | topoisomerase (DNA) III beta                                  | 0  | 1  | 0  |
| 21450255  | Tor1a    | torsin A                                                      | 2  | 0  | 0  |
| 229608948 | Tor1aip1 | torsin A interacting protein 1 isoform 2                      | 1  | 1  | 6  |
| 237512947 | Tor1aip2 | torsin A interacting protein 2                                | 5  | 0  | 2  |
| 3155990   | Tor1b    | torsin family 1, member B                                     | 6  | 0  | 1  |
| 224809275 | Tor3a    | torsin family 3, member A                                     | 1  | 0  | 0  |
| 111154067 | Tmem165  | TPA regulated locus                                           | 3  | 0  | 0  |
| 57164407  | Tanc1    | TPR domain, ankyrin-repeat and coiled-coil-containing         | 1  | 0  | 1  |
| 117606383 | Trabd    | TraB domain containing                                        | 3  | 0  | 0  |
| 227498519 | Traf3ip3 | TRAF3-interacting JNK-activating modulator                    | 0  | 1  | 2  |
| 66730565  | Trappc1  | trafficking protein particle complex 1                        | 1  | 0  | 0  |
| 7304929   | Trappc3  | trafficking protein particle complex 3                        | 2  | 1  | 0  |
| 157266281 | Trappc5  | trafficking protein particle complex 5                        | 0  | 1  | 0  |
| 257467582 | Trappc9  | trafficking protein particle complex 9 isoform 2              | 0  | 0  | 1  |
| 40254203  | Trak2    | trafficking protein, kinesin binding 2                        | 1  | 0  | 0  |
| 227116358 | Mecr     | trans-2-enoyl-CoA reductase, mitochondrial precursor          | 8  | 5  | 0  |
| 119226255 | Sp1      | trans-acting transcription factor 1                           | 0  | 2  | 0  |
| 33859640  | Taldo1   | transaldolase 1                                               | 16 | 0  | 0  |
| 229094714 | Tcea1    | transcription elongation factor A (SII) 1 isoform 2           | 1  | 14 | 0  |
| 6678235   | Tcea2    | transcription elongation factor A protein 2                   | 3  | 1  | 0  |
| 21312712  | Tceb1    | transcription elongation factor B (SIII), polypeptide 1       | 2  | 0  | 0  |
| 13385800  | Tceb2    | transcription elongation factor B (SIII), polypeptide 2       | 3  | 2  | 0  |
| 31543847  | Tceb3    | transcription elongation factor B (SIII), polypeptide 3       | 1  | 0  | 1  |
| 87196334  | Tcerg1   | transcription elongation regulator 1                          | 0  | 40 | 0  |
| 166295206 | Tcf12    | transcription factor 12                                       | 0  | 1  | 0  |
| 111185898 | Tcf15    | transcription factor 15                                       | 0  | 1  | 0  |
| 166706889 | Tcf20    | transcription factor 20 isoform b                             | 0  | 0  | 1  |
| 218931198 | Tcf7l2   | transcription factor 7-like 2 isoform 1                       | 0  | 1  | 1  |
| 6678303   | Tfam     | transcription factor A, mitochondrial                         | 3  | 13 | 5  |
| 70609885  | Tcfap2b  | transcription factor AP-2 beta isoform 1                      | 0  | 2  | 1  |
| 171846238 | Tcfap2a  | transcription factor AP-2, alpha isoform a                    | 0  | 4  | 1  |
| 23346597  | Tcfap2d  | transcription factor AP-2, delta                              | 0  | 1  | 0  |
| 120444920 | Tcfap2e  | transcription factor AP-2, epsilon                            | 0  | 1  | 1  |
| 228008354 | Tcfap2c  | transcription factor AP-2, gamma isoform 1                    | 0  | 2  | 0  |

|           |          |                                                                                                 |    |    |   |
|-----------|----------|-------------------------------------------------------------------------------------------------|----|----|---|
| 13626034  | Tcfap4   | transcription factor AP4                                                                        | 0  | 1  | 0 |
| 22122569  | Tfb1m    | transcription factor B1, mitochondrial                                                          | 0  | 1  | 0 |
| 15628025  | Tcfcp2   | transcription factor CP2                                                                        | 0  | 2  | 0 |
| 46810275  | Grhl2    | transcription factor CP2-like 3                                                                 | 0  | 7  | 0 |
| 157384992 | Tcfe3    | transcription factor E3 isoform a                                                               | 0  | 1  | 0 |
| 295789156 | Prdm16   | transcription factor MEL1                                                                       | 1  | 1  | 1 |
| 22122529  | Cdca7l   | transcription factor RAM2                                                                       | 0  | 1  | 1 |
| 83921607  | Vps72    | transcription factor-like 1                                                                     | 0  | 2  | 0 |
| 70608137  | Brf1     | transcription initiation factor IIIB                                                            | 2  | 0  | 1 |
| 134053939 | Tcfcp2l1 | transcription repressor CRTR-1                                                                  | 0  | 4  | 0 |
| 21314854  | Gatad2b  | transcription repressor p66 component of the MeCP1 complex                                      | 0  | 5  | 3 |
| 111154070 | Ttf1     | transcription termination factor 1                                                              | 0  | 1  | 3 |
| 254692909 | Ttf2     | transcription termination factor, RNA polymerase II                                             | 0  | 0  | 1 |
| 21313610  | Tada1l   | transcriptional adaptor 1-like                                                                  | 0  | 1  | 0 |
| 76253678  | Med27    | transcriptional co-activator CRSP8 homolog                                                      | 0  | 1  | 0 |
| 160333360 | Sin3a    | transcriptional regulator, SIN3A isoform 1                                                      | 0  | 17 | 2 |
| 33468969  | Tbl1x    | transducin (beta)-like 1 X-linked                                                               | 0  | 5  | 0 |
| 30102935  | Tbl3     | transducin (beta)-like 3                                                                        | 0  | 8  | 8 |
| 113204630 | Trfr2    | transferrin receptor 2                                                                          | 1  | 0  | 0 |
| 160333077 | Trp53bp1 | transformation related protein 53 binding protein 1                                             | 0  | 71 | 2 |
| 187960040 | Trp53    | transformation related protein 53 isoform a                                                     | 0  | 3  | 0 |
| 124486949 | Trrap    | transformation/transcription domain-associated protein                                          | 0  | 99 | 1 |
| 251823820 | Mdm1     | transformed mouse 3T3 cell double minute 1 isoform 2                                            | 0  | 1  | 0 |
| 111160869 | Tra2a    | transformer-2 alpha                                                                             | 0  | 3  | 5 |
| 110681727 | Tacc1    | transforming acidic coiled-coil containing protein 1 short isoform                              | 0  | 0  | 1 |
| 194394227 | Tbrg4    | transforming growth factor beta regulated gene 4                                                | 3  | 0  | 0 |
| 30519911  | Tagln2   | transgelin 2                                                                                    | 9  | 10 | 1 |
| 9790125   | Tagln3   | transgelin 3                                                                                    | 1  | 0  | 0 |
| 239787892 | Tgm1     | transglutaminase 1, K polypeptide                                                               | 0  | 0  | 1 |
| 6678329   | Tgm2     | transglutaminase 2, C polypeptide                                                               | 1  | 0  | 0 |
| 227500026 | Tgm4     | transglutaminase 4 (prostate)                                                                   | 0  | 1  | 0 |
| 29244202  | Tgm6     | transglutaminase 6                                                                              | 1  | 0  | 0 |
| 8394487   | Trpc4    | transient receptor potential cation channel, subfamily C, member 4                              | 0  | 1  | 0 |
| 254540210 | Trpc4ap  | transient receptor potential cation channel, subfamily C, member 4 associated protein isoform 2 | 1  | 0  | 0 |
| 6678435   | Trpc5    | transient receptor potential cation channel, subfamily C, member 5                              | 0  | 1  | 0 |
| 261878536 | Trpm2    | transient receptor potential cation channel, subfamily M, member 2                              | 0  | 0  | 1 |
| 148271109 | Trpm5    | transient receptor potential cation channel, subfamily M, member 5                              | 0  | 0  | 1 |
| 256773287 | Trpm7    | transient receptor potential cation channel, subfamily M, member 7                              | 0  | 0  | 2 |
| 19527416  | Trpm8    | transient receptor potential cation channel, subfamily M, member 8                              | 1  | 0  | 0 |
| 266458389 | Trpv3    | transient receptor potential cation channel, subfamily V, member 3                              | 0  | 1  | 0 |
| 269784723 | Trpv4    | transient receptor potential cation channel, subfamily V, member 4                              | 7  | 0  | 4 |
| 6678359   | Tkt      | transketolase                                                                                   | 27 | 1  | 5 |
| 148287022 | Tktl2    | transketolase-like 2                                                                            | 1  | 0  | 0 |
| 6755899   | Tsn      | translin                                                                                        | 6  | 2  | 0 |

|           |               |                                                                   |    |   |    |
|-----------|---------------|-------------------------------------------------------------------|----|---|----|
| 8394490   | Tsnax         | translin-associated factor X                                      | 2  | 0 | 0  |
| 29789217  | Tsnaxip1      | translin-associated factor X (Tsnax) interacting protein 1        | 1  | 0 | 0  |
| 158937240 | Timm10        | translocase of inner mitochondrial membrane 13 homolog a          | 1  | 0 | 0  |
| 33468937  | Timm17b       | translocase of inner mitochondrial membrane 17b                   | 1  | 0 | 2  |
| 254675168 | Timm23        | translocase of inner mitochondrial membrane 23 homolog            | 1  | 0 | 1  |
| 170763467 | Timm44        | translocase of inner mitochondrial membrane 44                    | 7  | 0 | 1  |
| 22094989  | Timm50        | translocase of inner mitochondrial membrane 50 homolog            | 8  | 0 | 3  |
| 7305577   | Timm8a1       | translocase of inner mitochondrial membrane 8 homolog a           | 1  | 4 | 0  |
| 7305579   | Timm8b        | translocase of inner mitochondrial membrane 8 homolog b           | 2  | 4 | 0  |
| 67846109  | Timm9         | translocase of inner mitochondrial membrane 9 homolog             | 5  | 0 | 1  |
| 7305581   | Timm13        | translocase of inner mitochondrial membrane 9 homolog             | 3  | 5 | 2  |
| 13324686  | Tomm20        | translocase of outer mitochondrial membrane 20 homolog            | 1  | 0 | 4  |
| 31982091  | Tomm22        | translocase of outer mitochondrial membrane 22 homolog            | 1  | 0 | 6  |
| 13385500  | Tomm34        | translocase of outer mitochondrial membrane 34                    | 1  | 8 | 0  |
| 157909801 | Tomm40        | translocase of outer mitochondrial membrane 40                    | 5  | 0 | 10 |
| 197382455 | Tomm5         | translocase of outer mitochondrial membrane 5 homolog isoform 2   | 0  | 0 | 3  |
| 258547111 | Tomm6         | translocase of outer mitochondrial membrane 6 homolog             | 0  | 0 | 1  |
| 27552760  | Tomm70a       | translocase of outer mitochondrial membrane 70 homolog A          | 11 | 9 | 12 |
| 71061477  | Dnajc19       | translocase of the inner mitochondrial membrane 14 isoform 1      | 2  | 1 | 0  |
| 30794386  | Tram1         | translocating chain-associating membrane protein 1                | 2  | 0 | 1  |
| 39930429  | Sec62         | translocation protein 1                                           | 6  | 0 | 3  |
| 188528894 | Tm9sf2        | transmembrane 9 superfamily member 2                              | 4  | 0 | 2  |
| 31542095  | Tm9sf4        | transmembrane 9 superfamily protein member 4                      | 3  | 0 | 0  |
| 58037405  | 4930563P21Rik | transmembrane and coiled-coil domain-containing protein 5B        | 1  | 0 | 0  |
| 30725710  | Tmcc2         | transmembrane and coiled-coil domains 2                           | 1  | 0 | 0  |
| 26986589  | Tmco3         | transmembrane and coiled-coil domains 3                           | 1  | 0 | 0  |
| 21313340  | Tmco4         | transmembrane and coiled-coil domains 4                           | 1  | 0 | 0  |
| 75677476  | Tmtc3         | transmembrane and tetratricopeptide repeat containing 3 isoform 1 | 1  | 0 | 0  |
| 58037339  | Tmtc4         | transmembrane and tetratricopeptide repeat containing 4           | 1  | 0 | 0  |
| 71143116  | Tapt1         | transmembrane anterior posterior transformation 1                 | 1  | 0 | 0  |
| 283945630 | Tmbim6        | transmembrane BAX inhibitor motif containing 6                    | 3  | 0 | 0  |
| 20127392  | Tmc1          | transmembrane channel-like gene family 1                          | 1  | 0 | 0  |
| 110665719 | Tmc3          | transmembrane channel-like gene family 3                          | 0  | 0 | 1  |
| 304434595 | Tmc8          | transmembrane channel-like gene family 8                          | 0  | 1 | 0  |
| 85362703  | Tmed1         | transmembrane emp24 domain containing 1                           | 3  | 0 | 0  |
| 281427153 | Tmed3         | transmembrane emp24 domain containing 3                           | 2  | 0 | 0  |
| 9790015   | Tmed2         | transmembrane emp24 domain trafficking protein 2                  | 5  | 0 | 2  |
| 21312062  | Tmed10        | transmembrane emp24 domain-containing protein 10                  | 8  | 2 | 6  |
| 19527236  | Tmed4         | transmembrane emp24 protein transport domain containing 4         | 6  | 0 | 2  |
| 21746165  | Tmed5         | transmembrane emp24 protein transport domain containing 5         | 5  | 1 | 2  |

|           |          |                                                             |    |    |    |
|-----------|----------|-------------------------------------------------------------|----|----|----|
| 145966911 | Tmed9    | transmembrane emp24 protein transport domain containing 9   | 4  | 0  | 3  |
| 34328226  | Tmprss2  | transmembrane protease, serine 2                            | 1  | 0  | 0  |
| 262118243 | Tmem101  | transmembrane protein 101                                   | 1  | 0  | 0  |
| 145966766 | Tmem102  | transmembrane protein 102                                   | 1  | 0  | 0  |
| 188035856 | Tmem106b | transmembrane protein 106B                                  | 3  | 0  | 0  |
| 19527378  | Tmem109  | transmembrane protein 109                                   | 2  | 1  | 1  |
| 281182922 | Tmem11   | transmembrane protein 11                                    | 2  | 0  | 1  |
| 28827824  | Tmem111  | transmembrane protein 111                                   | 2  | 1  | 3  |
| 30520273  | Tmem117  | transmembrane protein 117                                   | 1  | 0  | 0  |
| 119637853 | Tmem145  | transmembrane protein 145                                   | 1  | 0  | 0  |
| 120952692 | Tmem147  | transmembrane protein 147                                   | 1  | 0  | 0  |
| 13384766  | Tmem14c  | transmembrane protein 14C                                   | 3  | 0  | 2  |
| 21704194  | Tmem161a | transmembrane protein 161A                                  | 1  | 0  | 0  |
| 313569833 | Tmem164  | transmembrane protein 164                                   | 1  | 0  | 0  |
| 30424705  | Tmem177  | transmembrane protein 177                                   | 1  | 0  | 0  |
| 68342040  | Tmem201  | transmembrane protein 201 isoform b                         | 0  | 0  | 2  |
| 40254356  | Tmem209  | transmembrane protein 209                                   | 0  | 0  | 4  |
| 31559970  | Tmem214  | transmembrane protein 214                                   | 2  | 0  | 1  |
| 160333448 | Tmem22   | transmembrane protein 22                                    | 0  | 0  | 1  |
| 283837771 | Tmem26   | transmembrane protein 26                                    | 0  | 0  | 1  |
| 68533251  | Tmem33   | transmembrane protein 33 isoform 2                          | 3  | 0  | 2  |
| 85662379  | Tmem41b  | transmembrane protein 41B                                   | 2  | 0  | 0  |
| 21311891  | Tmem43   | transmembrane protein 43                                    | 8  | 0  | 5  |
| 21450349  | Tmem45b  | transmembrane protein 45b                                   | 1  | 0  | 0  |
| 20270285  | Tmem47   | transmembrane protein 47 isoform 1                          | 1  | 0  | 0  |
| 28077005  | Tmem48   | transmembrane protein 48                                    | 0  | 0  | 3  |
| 27753991  | Tmem49   | transmembrane protein 49                                    | 1  | 0  | 0  |
| 23346449  | Tmem5    | transmembrane protein 5                                     | 0  | 0  | 1  |
| 21313410  | Tmem50b  | transmembrane protein 50B                                   | 0  | 0  | 1  |
| 21703804  | Tmem51   | transmembrane protein 51                                    | 1  | 0  | 0  |
| 226342964 | Tmem63b  | transmembrane protein 63b                                   | 0  | 0  | 1  |
| 158631230 | Tmem66   | transmembrane protein 66                                    | 1  | 0  | 0  |
| 117647265 | Tmem70   | transmembrane protein 70 isoform 1                          | 1  | 0  | 0  |
| 13386014  | Tmem85   | transmembrane protein 85                                    | 1  | 1  | 1  |
| 160333204 | Tmem87a  | transmembrane protein 87A isoform 1                         | 1  | 0  | 0  |
| 19111162  | Tm9sf3   | transmembrane protein 9 superfamily member 3                | 7  | 0  | 1  |
| 281306757 | Tmem93   | transmembrane protein 93                                    | 2  | 0  | 0  |
| 239835769 | Tap1     | transporter 1, ATP-binding cassette, sub-family B isoform 1 | 0  | 0  | 1  |
| 115385968 | Tnpo1    | transportin 1 isoform 1                                     | 3  | 0  | 1  |
| 54312056  | Tnpo3    | transportin 3                                               | 1  | 2  | 1  |
| 6755742   | Tcof1    | treacle                                                     | 0  | 6  | 0  |
| 26892291  | Tinf2    | TRF1-interacting nuclear factor 2                           | 0  | 1  | 0  |
| 9910590   | Med20    | Trf-proximal protein homolog                                | 0  | 4  | 0  |
| 13994125  | Trem2    | triggering receptor expressed on myeloid cells 2            | 0  | 0  | 1  |
| 58037247  | Trem1    | triggering receptor expressed on myeloid cells-like 1       | 1  | 0  | 0  |
| 170172511 | Tnrc18   | trinucleotide repeat containing 18 isoform B                | 1  | 0  | 0  |
| 88501749  | Triobp   | TRIO and F-actin binding protein isoform 3                  | 0  | 4  | 3  |
| 226958349 | Tpi1     | triosephosphate isomerase 1                                 | 16 | 3  | 14 |
| 165377144 | Trim68   | tripartite motif containing 68                              | 0  | 0  | 1  |
| 128485541 | Trim26   | tripartite motif protein 26 isoform a                       | 0  | 0  | 1  |
| 170295840 | Trim28   | tripartite motif protein 28                                 | 10 | 23 | 8  |
| 160333881 | Trim29   | tripartite motif protein 29                                 | 1  | 0  | 0  |



|           |               |                                                           |    |    |    |
|-----------|---------------|-----------------------------------------------------------|----|----|----|
| 119637830 | Trim33        | tripartite motif protein 33 isoform 1                     | 1  | 1  | 1  |
| 167466254 | Trim7         | tripartite motif protein 7                                | 0  | 0  | 1  |
| 94420998  | Trim24        | tripartite motif-containing 24                            | 0  | 0  | 1  |
| 289063457 | Trim40        | tripartite motif-containing 40                            | 0  | 1  | 0  |
| 124358936 | Trim41        | tripartite motif-containing 41                            | 1  | 1  | 0  |
| 260099704 | Trim45        | tripartite motif-containing 45                            | 0  | 0  | 1  |
| 160333353 | Trim69        | tripartite motif-containing 69                            | 2  | 0  | 0  |
| 6678419   | Tpp2          | tripeptidyl peptidase II                                  | 1  | 1  | 0  |
| 6753448   | Tpp1          | tripeptidyl-peptidase I                                   | 7  | 2  | 0  |
| 145587082 | Trio          | triple functional domain (PTPRF interacting)              | 0  | 0  | 1  |
| 9790261   | Tfg           | Trk-fused                                                 | 6  | 0  | 0  |
| 261823938 | Trmt112       | TRM112-like                                               | 1  | 3  | 0  |
| 255958185 | Tsen34        | tRNA-intron endonuclease 34                               | 1  | 0  | 0  |
| 291045186 | Tyw3          | tRNA-yW synthesizing protein 3 homolog                    | 1  | 0  | 0  |
| 84697031  | Tmod2         | tropomodulin 2                                            | 0  | 1  | 0  |
| 8394460   | Tmod3         | tropomodulin 3                                            | 4  | 6  | 13 |
| 256000792 | Tpm1          | tropomyosin 1, alpha                                      | 7  | 12 | 7  |
| 40254525  | Tpm3          | tropomyosin 3, gamma                                      | 8  | 7  | 5  |
| 47894398  | Tpm4          | tropomyosin 4                                             | 10 | 10 | 2  |
| 6678393   | Tnni3         | troponin I, cardiac 3                                     | 0  | 1  | 0  |
| 51092303  | Gm5409        | Try10-like trypsinogen                                    | 0  | 3  | 0  |
| 84781771  | Try10         | trypsin 10                                                | 0  | 1  | 0  |
| 51010909  | Try5          | trypsin 5                                                 | 0  | 2  | 1  |
| 71043961  | 2210010C04Rik | trypsinogen 7                                             | 3  | 6  | 3  |
| 209862985 | Tph1          | tryptophan hydroxylase 1 isoform 2                        | 0  | 1  | 0  |
| 46409250  | Wrb           | tryptophan rich basic protein                             | 1  | 0  | 0  |
| 256818806 | Wars          | tryptophanyl-tRNA synthetase                              | 4  | 0  | 0  |
| 21313468  | Tsfm          | Ts translation elongation factor, mitochondrial           | 7  | 5  | 2  |
| 254911131 | Tufm          | Tu translation elongation factor, mitochondrial isoform 1 | 19 | 2  | 5  |
| 157057154 | Tulp4         | tubby like protein 4 isoform b                            | 2  | 0  | 0  |
| 6755905   | Tulp3         | tubby-like protein 3                                      | 1  | 0  | 0  |
| 79750409  | Tsc1          | tuberous sclerosis 1                                      | 0  | 1  | 0  |
| 134288894 | Ttll9         | tubulin tyrosine ligase like family 9 isoform 1           | 0  | 0  | 1  |
| 269954711 | Ttll12        | tubulin tyrosine ligase-like family, member 12            | 3  | 0  | 0  |
| 6755901   | Tuba1a        | tubulin, alpha 1                                          | 1  | 0  | 0  |
| 34740335  | Tuba1b        | tubulin, alpha 1B                                         | 2  | 1  | 2  |
| 6678469   | Tuba1c        | tubulin, alpha 1C                                         | 24 | 6  | 18 |
| 6678467   | Tuba4a        | tubulin, alpha 4                                          | 3  | 0  | 1  |
| 21746161  | Tubb2b        | tubulin, beta                                             | 10 | 6  | 9  |
| 33859488  | Tubb2a        | tubulin, beta 2                                           | 1  | 0  | 1  |
| 22165384  | Tubb2c        | tubulin, beta 2C                                          | 1  | 0  | 1  |
| 12963615  | Tubb3         | tubulin, beta 3                                           | 1  | 1  | 0  |
| 31981939  | Tubb4         | tubulin, beta 4                                           | 3  | 0  | 2  |
| 7106439   | Tubb5         | tubulin, beta 5                                           | 5  | 3  | 7  |
| 27754056  | Tubb6         | tubulin, beta 6                                           | 14 | 3  | 9  |
| 19527246  | Tubg2         | tubulin, gamma 2                                          | 1  | 1  | 1  |
| 228008297 | Tubgcp2       | tubulin, gamma complex associated protein 2               | 1  | 0  | 0  |
| 39930567  | Tubgcp3       | tubulin, gamma complex associated protein 3               | 0  | 0  | 1  |
| 10190660  | Tfip11        | tuftelin interacting protein 11                           | 0  | 0  | 5  |
| 114842415 | Tnfsf11       | tumor necrosis factor (ligand) superfamily, member 11     | 0  | 0  | 1  |
| 70778792  | Tnfrsf1b      | tumor necrosis factor receptor superfamily, member 1b     | 0  | 0  | 1  |
| 30519885  | Tnfrsf21      | tumor necrosis factor receptor superfamily, member 21     | 0  | 1  | 0  |
| 70608214  | Tpd52         | tumor protein D52 isoform 4                               | 5  | 0  | 0  |
| 6678409   | Tpd52l1       | tumor protein D52-like 1                                  | 1  | 0  | 0  |

|           |               |                                                                                             |    |    |    |
|-----------|---------------|---------------------------------------------------------------------------------------------|----|----|----|
| 31560247  | Tpd52l2       | tumor protein D52-like 2                                                                    | 5  | 0  | 0  |
| 112799851 | Trp53bp2      | tumor protein p53 binding protein, 2                                                        | 0  | 1  | 0  |
| 6678437   | Tpt1          | tumor protein, translationally-controlled 1                                                 | 5  | 3  | 1  |
| 6755863   | Hsp90b1       | tumor rejection antigen gp96                                                                | 43 | 1  | 10 |
| 9789955   | Tusc2         | tumor suppressor candidate 2                                                                | 0  | 1  | 0  |
| 124248487 | Tusc3         | tumor suppressor candidate 3                                                                | 1  | 0  | 1  |
| 254588052 | Ttyh3         | tweety 3                                                                                    | 1  | 0  | 0  |
| 62990169  | Twf1          | twinfilin 1                                                                                 | 1  | 9  | 0  |
| 6755224   | Twf2          | twinfilin-like protein                                                                      | 0  | 2  | 0  |
| 27545207  | Twistnb       | TWIST neighbor                                                                              | 0  | 6  | 0  |
| 157057192 | Lin9          | type I interferon receptor beta chain-associated isoform 2                                  | 1  | 0  | 0  |
| 51092301  | Gm5414        | type II keratin Kb14                                                                        | 1  | 0  | 1  |
| 31543974  | Ywhab         | tyrosine 3-monooxygenase/tryptophan 5-monooxygenase activation protein, beta polypeptide    | 8  | 7  | 6  |
| 226874906 | Ywhae         | tyrosine 3-monooxygenase/tryptophan 5-monooxygenase activation protein, epsilon polypeptide | 15 | 3  | 6  |
| 6756037   | Ywhah         | tyrosine 3-monooxygenase/tryptophan 5-monooxygenase activation protein, eta polypeptide     | 9  | 5  | 5  |
| 6756039   | Ywhaq         | tyrosine 3-monooxygenase/tryptophan 5-monooxygenase activation protein, theta polypeptide   | 8  | 4  | 7  |
| 6756041   | Ywhaz         | tyrosine 3-monooxygenase/tryptophan 5-monooxygenase activation protein, zeta polypeptide    | 2  | 6  | 9  |
| 165377181 | Yars          | tyrosyl-tRNA synthetase                                                                     | 2  | 3  | 0  |
| 31543595  | Ubox5         | U box domain containing 5                                                                   | 0  | 1  | 0  |
| 6755596   | Snrpc         | U1 small nuclear ribonucleoprotein 1C                                                       | 0  | 2  | 2  |
| 67846113  | Snrnp70       | U1 small nuclear ribonucleoprotein 70 kDa                                                   | 6  | 14 | 3  |
| 71067104  | Snrnp48       | U11/U12 snRNP 48K                                                                           | 1  | 0  | 0  |
| 254939700 | U2af1         | U2 small nuclear ribonucleoprotein auxiliary factor (U2AF) 1 isoform 1                      | 1  | 6  | 4  |
| 6755917   | Zrsr1         | U2 small nuclear ribonucleoprotein auxiliary factor (U2AF) 1, related sequence 1            | 0  | 1  | 0  |
| 327365322 | U2af2         | U2 small nuclear ribonucleoprotein auxiliary factor (U2AF) 2                                | 6  | 14 | 6  |
| 23956110  | Snrpb2        | U2 small nuclear ribonucleoprotein B                                                        | 2  | 3  | 4  |
| 228480232 | Snrpa1        | U2 small nuclear ribonucleoprotein polypeptide A                                            | 6  | 8  | 9  |
| 25072205  | U2af1l4       | U2 small nuclear RNA auxiliary factor 1-like 4                                              | 0  | 4  | 0  |
| 171460910 | 2610101N10Rik | U2-associated SR140 protein 2                                                               | 0  | 10 | 12 |
| 190684705 | Imp4          | U3 snoRNP protein 4 homolog                                                                 | 0  | 0  | 2  |
| 21704248  | Rrp9          | U3 snoRNP-associated protein                                                                | 0  | 2  | 8  |
| 21539655  | Prpf6         | U5 snRNP-associated 102 kDa protein                                                         | 3  | 23 | 4  |
| 115298670 | Snrnp40       | U5 snRNP-specific protein (Prp8-binding)                                                    | 0  | 14 | 12 |
| 40018610  | Snrnp200      | U5 snRNP-specific protein, 200 kDa                                                          | 11 | 86 | 74 |
| 19527156  | Lsm8          | U6 snRNA-associated Sm-like protein LSM8                                                    | 3  | 4  | 3  |
| 253795523 | Lsm10         | U7 snRNP-specific Sm-like protein LSM10                                                     | 0  | 1  | 0  |
| 50054188  | Mum1          | UBE-1C2 protein                                                                             | 0  | 1  | 1  |
| 21311819  | Ubiad1        | UbiA prenyltransferase domain containing 1                                                  | 0  | 0  | 1  |
| 125490373 | Gm10035       | UbiE3 protein                                                                               | 2  | 0  | 1  |
| 158749567 | Ubn2          | ubiquitin 2                                                                                 | 1  | 0  | 0  |
| 22726191  | Ubqln1        | ubiquilin 1 isoform 2                                                                       | 2  | 0  | 0  |
| 34328236  | Ubqln2        | ubiquilin 2                                                                                 | 7  | 0  | 0  |
| 38348486  | Ubqln3        | ubiquilin 3                                                                                 | 1  | 0  | 0  |
| 15805016  | Ubqln4        | ubiquilin 4                                                                                 | 0  | 1  | 1  |
| 22267442  | Uqcrc2        | ubiquinol cytochrome c reductase core protein 2                                             | 13 | 2  | 14 |
| 13385726  | Uqcrb         | ubiquinol-cytochrome c reductase binding protein                                            | 2  | 3  | 5  |

|           |               |                                                                    |    |    |    |
|-----------|---------------|--------------------------------------------------------------------|----|----|----|
| 37574048  | 1110020P15Rik | ubiquinol-cytochrome c reductase complex protein                   | 2  | 2  | 2  |
| 46593021  | Uqcrc1        | ubiquinol-cytochrome c reductase core protein 1                    | 14 | 1  | 13 |
| 21539599  | Uqcrh         | ubiquinol-cytochrome c reductase hinge protein                     | 3  | 1  | 2  |
| 13385112  | Uqcr          | ubiquinol-cytochrome c reductase subunit                           | 1  | 0  | 0  |
| 21539585  | Uqcrq         | ubiquinol-cytochrome c reductase, complex III subunit VII          | 1  | 1  | 1  |
| 13385168  | Uqcrfs1       | ubiquinol-cytochrome c reductase, Rieske iron-sulfur polypeptide 1 | 8  | 4  | 8  |
| 157671923 | Ubc           | ubiquitin C                                                        | 0  | 0  | 1  |
| 139948802 | Uchl3         | ubiquitin carboxyl-terminal esterase L3                            | 2  | 0  | 0  |
| 15809026  | Uchl4         | ubiquitin carboxyl-terminal esterase L4                            | 6  | 0  | 0  |
| 229577283 | Uchl5         | ubiquitin carboxyl-terminal hydrolase L5 isoform 1                 | 0  | 3  | 0  |
| 21703984  | Ubt1          | ubiquitin domain containing 1                                      | 0  | 0  | 1  |
| 257153392 | Ufd1l         | ubiquitin fusion degradation 1 like                                | 0  | 1  | 0  |
| 32189428  | Mib1          | ubiquitin ligase mind bomb                                         | 0  | 1  | 0  |
| 293651567 | Ubr2          | ubiquitin protein ligase E3 component n-recogin 2                  | 0  | 1  | 1  |
| 163310753 | Ubr5          | ubiquitin protein ligase E3 component n-recogin 5 isoform 1        | 3  | 0  | 0  |
| 76880500  | Ube3a         | ubiquitin protein ligase E3A isoform 2                             | 1  | 0  | 0  |
| 6678493   | Usp10         | ubiquitin specific peptidase 10                                    | 1  | 0  | 0  |
| 251823802 | Usp16         | ubiquitin specific peptidase 16                                    | 0  | 1  | 1  |
| 262050630 | Usp26         | ubiquitin specific peptidase 26                                    | 0  | 1  | 0  |
| 114145573 | Usp29         | ubiquitin specific peptidase 29                                    | 1  | 0  | 0  |
| 226442882 | Usp36         | ubiquitin specific peptidase 36                                    | 0  | 0  | 1  |
| 34328301  | Usp38         | ubiquitin specific peptidase 38                                    | 1  | 0  | 0  |
| 20070404  | Usp39         | ubiquitin specific peptidase 39                                    | 5  | 18 | 1  |
| 116686116 | Usp42         | ubiquitin specific peptidase 42                                    | 1  | 0  | 1  |
| 29243896  | Usp46         | ubiquitin specific peptidase 46                                    | 0  | 1  | 0  |
| 7305619   | Usp5          | ubiquitin specific peptidase 5                                     | 4  | 0  | 0  |
| 154146209 | Usp7          | ubiquitin specific peptidase 7                                     | 5  | 17 | 1  |
| 169646342 | Usp1          | ubiquitin specific peptidase like 1 isoform A                      | 1  | 0  | 0  |
| 84452155  | Usp14         | ubiquitin specific protease 14 isoform 1                           | 3  | 0  | 0  |
| 126032299 | Usp32         | ubiquitin specific protease 32                                     | 1  | 0  | 0  |
| 114053325 | Usp48         | ubiquitin specific protease 48                                     | 0  | 2  | 0  |
| 115511018 | Usp9x         | ubiquitin specific protease 9, X chromosome                        | 5  | 0  | 1  |
| 270265851 | Usp19         | ubiquitin thioesterase 19                                          | 0  | 2  | 0  |
| 310688895 | Usp40         | ubiquitin thioesterase 40                                          | 0  | 0  | 1  |
| 110625685 | Usp22         | ubiquitin thioesterase 22                                          | 0  | 1  | 0  |
| 21450103  | Usp3          | ubiquitin thioesterase 3                                           | 0  | 3  | 0  |
| 162135936 | Uba3          | ubiquitin-activating enzyme 3 isoform 1                            | 1  | 0  | 0  |
| 209862989 | Uba1          | ubiquitin-activating enzyme E1 isoform 2                           | 18 | 0  | 2  |
| 6755923   | Ube1y1        | ubiquitin-activating enzyme E1, Chr Y 1                            | 1  | 0  | 0  |
| 167736371 | Ube4a         | ubiquitination factor E4A                                          | 1  | 0  | 0  |
| 42741690  | Ube2v1        | ubiquitin-conjugating enzyme E2 variant 1                          | 1  | 0  | 1  |
| 31980960  | Ube2j1        | ubiquitin-conjugating enzyme E2, J1                                | 0  | 1  | 1  |
| 85662419  | Ube2j2        | ubiquitin-conjugating enzyme E2, J2 homolog isoform a              | 0  | 0  | 1  |
| 9790041   | Ube2a         | ubiquitin-conjugating enzyme E2A, RAD6 homolog                     | 0  | 1  | 0  |
| 21312888  | Ube2c         | ubiquitin-conjugating enzyme E2C                                   | 1  | 0  | 0  |
| 213512454 | Gm9762        | ubiquitin-conjugating enzyme E2D 2 related protein                 | 1  | 1  | 0  |
| 6678479   | Ube2e1        | ubiquitin-conjugating enzyme E2E 1, UBC4/5 homolog                 | 1  | 0  | 0  |
| 281332144 | Ube2h         | ubiquitin-conjugating enzyme E2H                                   | 1  | 0  | 0  |
| 294862307 | Ube2i         | ubiquitin-conjugating enzyme E2I                                   | 2  | 5  | 1  |
| 31542956  | Ube2k         | ubiquitin-conjugating enzyme E2K                                   | 3  | 0  | 0  |
| 6678481   | Ube2l3        | ubiquitin-conjugating enzyme E2L 3                                 | 4  | 0  | 0  |

|           |           |                                                                                              |    |   |   |
|-----------|-----------|----------------------------------------------------------------------------------------------|----|---|---|
| 270309117 | Ube2m     | ubiquitin-conjugating enzyme E2M                                                             | 2  | 0 | 0 |
| 18017605  | Ube2n     | ubiquitin-conjugating enzyme E2N                                                             | 3  | 2 | 3 |
| 257796272 | Ube2q2    | ubiquitin-conjugating enzyme E2Q 2                                                           | 1  | 0 | 0 |
| 13385778  | Ube2r2    | ubiquitin-conjugating enzyme E2R 2                                                           | 1  | 0 | 0 |
| 31543918  | Ube2v2    | ubiquitin-conjugating enzyme E2v2 isoform 1                                                  | 4  | 0 | 2 |
| 110625675 | Ube2w     | ubiquitin-conjugating enzyme E2W (putative)                                                  | 0  | 1 | 0 |
| 13385932  | Ufm1      | ubiquitin-fold modifier 1                                                                    | 2  | 0 | 0 |
| 6755925   | Ubl3      | ubiquitin-like 3                                                                             | 1  | 0 | 0 |
| 21703810  | Ubl4      | ubiquitin-like 4                                                                             | 0  | 2 | 0 |
| 13384784  | Ubl5      | ubiquitin-like 5                                                                             | 0  | 0 | 1 |
| 7709986   | Uba2      | ubiquitin-like modifier activating enzyme 2                                                  | 6  | 0 | 0 |
| 27370032  | Uba6      | ubiquitin-like modifier activating enzyme 6                                                  | 1  | 0 | 0 |
| 237681133 | Fau       | ubiquitin-like protein ubi and ribosomal protein S30 precursor                               | 1  | 4 | 0 |
| 162287241 | Uhrf1     | ubiquitin-like with PHD and ring finger domains 1 isoform B                                  | 0  | 7 | 2 |
| 224809307 | Usp21     | ubiquitin-specific protease 21                                                               | 0  | 1 | 2 |
| 124486616 | Zc3h7b    | ubiquitous tetratricopeptide containing protein RoXaN                                        | 0  | 1 | 0 |
| 85861252  | Ubxn4     | UBX domain containing 2                                                                      | 2  | 0 | 1 |
| 158533976 | Faf2      | UBX domain containing 8                                                                      | 5  | 0 | 3 |
| 164450477 | Ugt3a1    | UDP glycosyltransferases 3 family, polypeptide A1                                            | 1  | 0 | 0 |
| 9506417   | B3galt4   | UDP-Gal:betaGlcNAc beta 1,3-galactosyltransferase 4                                          | 0  | 1 | 0 |
| 66392577  | B3galt1   | UDP-Gal:betaGlcNAc beta 1,3-galactosyltransferase, polypeptide 1                             | 0  | 0 | 1 |
| 9910138   | B3galnt1  | UDP-GalNAc:betaGlcNAc beta 1,3-galactosaminyltransferase, polypeptide 1                      | 1  | 0 | 0 |
| 227496327 | B3gnt7    | UDP-GlcNAc:betaGal beta-1,3-N-acetylglucosaminyltransferase 7                                | 1  | 0 | 0 |
| 236466498 | Ugg1      | UDP-glucose ceramide glucosyltransferase-like 1                                              | 32 | 0 | 0 |
| 6678499   | Ugdh      | UDP-glucose dehydrogenase                                                                    | 3  | 0 | 0 |
| 21314832  | Ugp2      | UDP-glucose pyrophosphorylase 2                                                              | 3  | 0 | 0 |
| 46877109  | Galnt2    | UDP-N-acetyl-alpha-D-galactosamine:polypeptide N-acetylgalactosaminyltransferase 2           | 3  | 0 | 0 |
| 162951828 | Galnt3    | UDP-N-acetyl-alpha-D-galactosamine:polypeptide N-acetylgalactosaminyltransferase 3           | 13 | 3 | 4 |
| 7657112   | Galnt4    | UDP-N-acetyl-alpha-D-galactosamine:polypeptide N-acetylgalactosaminyltransferase 4           | 1  | 0 | 0 |
| 240120036 | Galnt6    | UDP-N-acetyl-alpha-D-galactosamine:polypeptide N-acetylgalactosaminyltransferase 6           | 2  | 0 | 0 |
| 169790937 | Galnt9    | UDP-N-acetyl-alpha-D-galactosamine:polypeptide N-acetylgalactosaminyltransferase 9 isoform A | 0  | 0 | 1 |
| 58000467  | Galnt12   | UDP-N-acetyl-alpha-D-galactosamine:polypeptide N-acetylgalactosaminyltransferase-like 2      | 1  | 0 | 0 |
| 30520375  | Uap1      | UDP-N-acetylglucosamine pyrophosphorylase 1                                                  | 1  | 0 | 0 |
| 31982409  | Dpagt1    | UDP-N-acetylglucosamine-dolichyl-phosphate N-acetylglucosaminophosphotransferase             | 1  | 0 | 0 |
| 84794548  | Uap111    | UDP-N-acteylglucosamine pyrophosphorylase 1-like 1                                           | 9  | 0 | 0 |
| 269914114 | Uhrf1bp1l | UHRF1 (ICBP90) binding protein 1-like                                                        | 1  | 0 | 0 |
| 165377065 | Cmpk1     | UMP-CMP kinase 1                                                                             | 6  | 0 | 0 |
| 24418903  | Fermt3    | UNC-112 related protein 2                                                                    | 0  | 1 | 1 |
| 30425054  | Unc119b   | unc-119 homolog B                                                                            | 1  | 0 | 0 |
| 124487217 | Unc13c    | unc13 homolog 3                                                                              | 1  | 1 | 0 |
| 283837783 | Unc13a    | unc-13 homolog A                                                                             | 1  | 0 | 0 |
| 62243588  | Unc13d    | unc-13 homolog D                                                                             | 1  | 1 | 2 |
| 227908790 | Unc45a    | unc-45 homolog A                                                                             | 2  | 1 | 0 |

|           |               |                                                                   |    |    |    |
|-----------|---------------|-------------------------------------------------------------------|----|----|----|
| 85861262  | Unc5b         | unc-5 homolog B                                                   | 0  | 0  | 1  |
| 6678505   | Unc5c         | unc-5 homolog C                                                   | 1  | 0  | 0  |
| 29789243  | Unc84a        | unc-84 homolog A                                                  | 0  | 0  | 15 |
| 329299037 | Unc84b        | unc-84 homolog B                                                  | 0  | 0  | 23 |
| 77404294  | Usmg5         | upregulated during skeletal muscle growth 5                       | 4  | 0  | 0  |
| 117938770 | 2010005J08Rik | up-regulated gene 4 isoform 2                                     | 0  | 1  | 0  |
| 134032032 | Ubp1          | upstream binding protein 1 isoform b                              | 0  | 1  | 0  |
| 113205057 | Ubtf          | upstream binding transcription factor, RNA polymerase I isoform 1 | 2  | 16 | 5  |
| 71274162  | Urb2          | URB2 ribosome biogenesis 2 homolog                                | 2  | 12 | 1  |
| 33859498  | Umps          | uridine monophosphate synthase                                    | 2  | 0  | 0  |
| 13507680  | Uck2          | uridine-cytidine kinase 2                                         | 1  | 0  | 0  |
| 21492632  | Ucn3          | urocortin 3                                                       | 0  | 0  | 1  |
| 58037127  | Upk1a         | uroplakin 1A                                                      | 5  | 0  | 0  |
| 110347606 | Urod          | uroporphyrinogen decarboxylase                                    | 1  | 0  | 0  |
| 145699097 | Ush2a         | usherin                                                           | 0  | 0  | 1  |
| 23956096  | Uso1          | USO1 homolog, vesicle docking protein                             | 12 | 0  | 6  |
| 13385534  | Utp11l        | UTP11-like, U3 small nucleolar ribonucleoprotein                  | 0  | 0  | 5  |
| 51889716  | Utp14a        | UTP14, U3 small nucleolar ribonucleoprotein, homolog A            | 0  | 0  | 2  |
| 209977087 | Utp14b        | UTP14, U3 small nucleolar ribonucleoprotein, homolog B            | 1  | 0  | 0  |
| 30725776  | Utp15         | UTP15, U3 small nucleolar ribonucleoprotein, homolog              | 0  | 1  | 6  |
| 61656180  | Utp18         | UTP18, small subunit processome component                         | 0  | 0  | 10 |
| 21313442  | Utp23         | UTP23, small subunit (SSU) processome component, homolog          | 0  | 0  | 1  |
| 12746430  | Utp3          | UTP3, small subunit processome component                          | 0  | 1  | 5  |
| 21450209  | Utp6          | UTP6, small subunit (SSU) processome component, homolog           | 0  | 2  | 3  |
| 110431378 | Utrn          | utrophin                                                          | 12 | 4  | 5  |
| 31542488  | Vac14         | Vac14 homolog                                                     | 1  | 0  | 1  |
| 71067122  | Vrk1          | vaccinia related kinase 1 isoform a                               | 0  | 17 | 0  |
| 19527166  | Vrk3          | vaccinia related kinase 3                                         | 0  | 11 | 2  |
| 45504359  | Atp6v1e1      | vacuolar H+ ATPase E1                                             | 3  | 0  | 2  |
| 15617197  | Atp6v1g1      | vacuolar H+ ATPase G1                                             | 1  | 0  | 2  |
| 19705578  | Atp6v1b2      | vacuolar H+ATPase B2                                              | 15 | 0  | 7  |
| 66392160  | Vps13a        | vacuolar protein sorting 13A                                      | 2  | 0  | 0  |
| 122114537 | Vps13c        | vacuolar protein sorting 13C                                      | 1  | 1  | 1  |
| 254939640 | Vps16         | vacuolar protein sorting 16                                       | 0  | 0  | 1  |
| 25092662  | Vps25         | vacuolar protein sorting 25                                       | 0  | 5  | 0  |
| 29825827  | Vps26b        | vacuolar protein sorting 26 homolog B                             | 2  | 0  | 0  |
| 164518904 | Vps26a        | vacuolar protein sorting 26 isoform a                             | 4  | 0  | 0  |
| 13385320  | Vps28         | vacuolar protein sorting 28                                       | 1  | 0  | 0  |
| 9790285   | Vps29         | vacuolar protein sorting 29                                       | 3  | 0  | 0  |
| 13928670  | Vps35         | vacuolar protein sorting 35                                       | 20 | 0  | 1  |
| 7305631   | Vps45         | vacuolar protein sorting 45                                       | 6  | 0  | 1  |
| 18699726  | Vps4a         | vacuolar protein sorting 4a                                       | 1  | 0  | 1  |
| 164698506 | Vps4b         | vacuolar protein sorting 4b                                       | 0  | 1  | 1  |
| 148747162 | Vps52         | vacuolar protein sorting 52                                       | 1  | 0  | 0  |
| 225543319 | Vcp           | valosin containing protein                                        | 32 | 1  | 2  |
| 255069795 | Vars          | valyl-tRNA synthetase                                             | 22 | 21 | 6  |
| 160333671 | Vars2         | valyl-tRNA synthetase 2, mitochondrial                            | 1  | 0  | 0  |
| 170295823 | Vcam1         | vascular cell adhesion molecule 1                                 | 0  | 0  | 1  |
| 117414176 | Vezf1         | vascular endothelial zinc finger 1                                | 0  | 1  | 0  |
| 160707909 | Vasp          | vasodilator-stimulated phosphoprotein                             | 2  | 3  | 1  |
| 210031395 | Vash1         | vasohibin 1                                                       | 0  | 0  | 1  |

|           |          |                                                                                                        |    |    |    |
|-----------|----------|--------------------------------------------------------------------------------------------------------|----|----|----|
| 31981693  | Vasn     | vasorin                                                                                                | 1  | 0  | 0  |
| 31559995  | Crk      | v-crck sarcoma virus CT10 oncogene homolog                                                             | 2  | 0  | 0  |
| 31542421  | Crkl     | v-crck sarcoma virus CT10 oncogene homolog (avian)-like                                                | 3  | 0  | 0  |
| 6755957   | Vax2     | ventral anterior homeobox containing gene 2                                                            | 1  | 1  | 0  |
| 146134398 | ErbB4    | v-erb-a erythroblastic leukemia viral oncogene homolog 4                                               | 1  | 0  | 0  |
| 54873610  | ErbB2    | v-erb-b2 erythroblastic leukemia viral oncogene homolog 2, neuro/glioblastoma derived oncogene homolog | 2  | 0  | 0  |
| 197333876 | Vcan     | versican isoform 5                                                                                     | 0  | 0  | 1  |
| 115270968 | Gvin1    | very large inducible GTPase 1                                                                          | 1  | 1  | 0  |
| 238637305 | Vldlr    | very low density lipoprotein receptor isoform a                                                        | 2  | 0  | 0  |
| 100817933 | Acad9    | very-long-chain acyl-CoA dehydrogenase VLCAD homolog                                                   | 22 | 0  | 2  |
| 33859662  | Vat1     | vesicle amine transport protein 1 homolog (T californica)                                              | 11 | 0  | 0  |
| 31980617  | Vti1b    | vesicle transport through interaction with t-SNAREs 1B homolog                                         | 4  | 0  | 0  |
| 13928668  | Vti1a    | vesicle transport through interaction with t-SNAREs homolog 1A                                         | 2  | 0  | 0  |
| 6678551   | Vamp2    | vesicle-associated membrane protein 2                                                                  | 2  | 0  | 0  |
| 31543938  | Vamp4    | vesicle-associated membrane protein 4                                                                  | 1  | 0  | 0  |
| 33468929  | Vamp7    | vesicle-associated membrane protein 7                                                                  | 1  | 0  | 0  |
| 31980629  | Vamp8    | vesicle-associated membrane protein 8                                                                  | 4  | 0  | 1  |
| 94721328  | Vapa     | vesicle-associated membrane protein, associated protein A                                              | 9  | 2  | 4  |
| 31543940  | Vapb     | vesicle-associated membrane protein, associated protein B and C                                        | 7  | 1  | 5  |
| 31543349  | Nsf      | vesicle-fusing ATPase                                                                                  | 9  | 0  | 0  |
| 27370298  | Exd1     | vesicle-fusing ATPase domain-like 1                                                                    | 2  | 0  | 0  |
| 190684696 | Vil1     | villin 1                                                                                               | 1  | 1  | 1  |
| 83921618  | Ezr      | villin 2                                                                                               | 12 | 21 | 3  |
| 257096033 | Vill     | villin-like                                                                                            | 0  | 1  | 1  |
| 31982755  | Vim      | vimentin                                                                                               | 0  | 1  | 1  |
| 31543942  | Vcl      | vinculin                                                                                               | 32 | 33 | 16 |
| 326806988 | Yes1     | viral oncogene yes homolog                                                                             | 0  | 0  | 2  |
| 13385626  | Med4     | vitamin D receptor interacting protein                                                                 | 0  | 2  | 0  |
| 6754608   | Maff     | v-maf musculoaponeurotic fibrosarcoma oncogene family, protein F                                       | 0  | 2  | 0  |
| 6754610   | Mafg     | v-maf musculoaponeurotic fibrosarcoma oncogene family, protein G                                       | 0  | 1  | 0  |
| 6754612   | Mafk     | v-maf musculoaponeurotic fibrosarcoma oncogene family, protein K                                       | 0  | 1  | 1  |
| 123173782 | NalcN    | voltage gated channel like 1                                                                           | 0  | 0  | 1  |
| 6755963   | Vdac1    | voltage-dependent anion channel 1                                                                      | 18 | 3  | 21 |
| 6755965   | Vdac2    | voltage-dependent anion channel 2                                                                      | 15 | 5  | 17 |
| 6755967   | Vdac3    | voltage-dependent anion channel 3                                                                      | 11 | 0  | 14 |
| 157042785 | Kcnh2    | voltage-gated potassium channel, subfamily H, member 2                                                 | 0  | 0  | 1  |
| 121949777 | V1ra1    | vomer nasal 1 receptor, A1                                                                             | 1  | 0  | 0  |
| 289666789 | V1rd22   | vomer nasal 1 receptor, D22                                                                            | 1  | 0  | 0  |
| 21717795  | V1rh20   | vomer nasal 1 receptor, H20                                                                            | 1  | 0  | 0  |
| 21717751  | V1rh8    | vomer nasal 1 receptor, H8                                                                             | 0  | 0  | 1  |
| 182765455 | Gm6674   | vomer nasal 1 receptor-like                                                                            | 1  | 0  | 0  |
| 157153652 | Vmn2r107 | vomer nasal 2, receptor 107                                                                            | 0  | 1  | 0  |
| 157167164 | Vmn2r116 | vomer nasal 2, receptor 116                                                                            | 0  | 1  | 1  |

|           |          |                                                              |    |    |    |
|-----------|----------|--------------------------------------------------------------|----|----|----|
| 157277973 | Vmn2r12  | vomeronasal 2, receptor 12                                   | 1  | 0  | 0  |
| 157278000 | Vmn2r23  | vomeronasal 2, receptor 23                                   | 1  | 0  | 0  |
| 157153646 | Vmn2r103 | vomeronasal receptor Vmn2r103                                | 0  | 1  | 0  |
| 156938265 | Vmn2r114 | vomeronasal receptor Vmn2r114                                | 0  | 1  | 1  |
| 157167162 | Vmn2r115 | vomeronasal receptor Vmn2r115                                | 0  | 1  | 1  |
| 156938271 | Vmn2r75  | vomeronasal receptor Vmn2r75                                 | 0  | 0  | 1  |
| 124248572 | Vbp1     | von Hippel-Lindau binding protein 1                          | 1  | 0  | 0  |
| 6678567   | Vhl      | von Hippel-Lindau syndrome protein homolog                   | 1  | 0  | 0  |
| 117320533 | Vwa3a    | von Willebrand factor A domain containing 3A                 | 0  | 1  | 3  |
| 225543185 | Vwa5a    | von Willebrand factor A domain containing 5A                 | 1  | 6  | 0  |
| 82617569  | Vprbp    | Vpr-binding protein                                          | 0  | 0  | 1  |
| 46849724  | Ankrd27  | VPS9-ankyrin repeat-containing protein isoform 2             | 0  | 1  | 0  |
| 227496776 | Araf     | v-raf murine sarcoma 3611 viral oncogene homolog isoform 1   | 0  | 1  | 1  |
| 11612509  | Ralb     | v-ral simian leukemia viral oncogene homolog B (ras related) | 2  | 4  | 4  |
| 6677709   | Rela     | v-rel reticuloendotheliosis viral oncogene homolog A         | 1  | 0  | 0  |
| 10946730  | Vstm2b   | V-set and transmembrane domain containing 2B                 | 0  | 0  | 1  |
| 87196519  | Wfdc10   | WAP four-disulfide core domain 10                            | 0  | 1  | 0  |
| 21312840  | Wfdc2    | WAP four-disulfide core domain 2                             | 0  | 1  | 0  |
| 123704807 | Wfdc8    | WAP four-disulfide core domain 8                             | 1  | 0  | 0  |
| 23510313  | Wasf2    | WAS protein family, member 2                                 | 0  | 5  | 0  |
| 40556280  | Wdte1    | WD and tetratricopeptide repeats 1                           | 0  | 1  | 0  |
| 21312280  | Wdfy1    | WD repeat and FYVE domain containing 1 isoform 1             | 1  | 1  | 0  |
| 39930599  | Wdfy3    | WD repeat and FYVE domain containing 3                       | 0  | 1  | 1  |
| 40254224  | Wdhd1    | WD repeat and HMG-box DNA binding protein 1                  | 0  | 0  | 1  |
| 6755995   | Wdr1     | WD repeat domain 1                                           | 15 | 13 | 0  |
| 312261274 | Wdr12    | WD repeat domain 12                                          | 0  | 0  | 3  |
| 288541355 | Wdr17    | WD repeat domain 17                                          | 1  | 0  | 0  |
| 83649741  | Wdr18    | WD repeat domain 18                                          | 0  | 4  | 1  |
| 154240688 | Wdr19    | WD repeat domain 19                                          | 0  | 1  | 0  |
| 116089310 | Wdr27    | WD repeat domain 27                                          | 1  | 0  | 0  |
| 30425338  | Wdr3     | WD repeat domain 3                                           | 0  | 9  | 11 |
| 21362285  | Wdr33    | WD repeat domain 33                                          | 0  | 7  | 3  |
| 31542010  | Wdr36    | WD repeat domain 36 isoform 2                                | 0  | 10 | 17 |
| 58037455  | Wdr38    | WD repeat domain 38                                          | 0  | 0  | 1  |
| 241896997 | Wdr43    | WD repeat domain 43 isoform 9                                | 0  | 3  | 11 |
| 10181122  | Wdr46    | WD repeat domain 46                                          | 0  | 0  | 3  |
| 33468987  | Wdr48    | WD repeat domain 48                                          | 0  | 1  | 0  |
| 18252790  | Wdr5     | WD repeat domain 5                                           | 0  | 12 | 1  |
| 56605680  | Thoc6    | WD repeat domain 58                                          | 0  | 13 | 0  |
| 21312318  | Wdr5b    | WD repeat domain 5B                                          | 0  | 1  | 0  |
| 13878227  | Wdr6     | WD repeat domain 6                                           | 0  | 1  | 0  |
| 70778817  | Wdr61    | WD repeat domain 61 isoform a                                | 3  | 7  | 0  |
| 268370090 | Wdr64    | WD repeat domain 64                                          | 0  | 1  | 0  |
| 264681545 | Wdr67    | WD repeat domain 67                                          | 1  | 0  | 0  |
| 124487149 | Wdr70    | WD repeat domain 70                                          | 0  | 2  | 0  |
| 83523742  | Wdr75    | WD repeat domain 75                                          | 0  | 0  | 8  |
| 124487321 | Wdr76    | WD repeat domain 76                                          | 0  | 4  | 0  |
| 226442867 | Wdr89    | WD repeat domain 89                                          | 0  | 2  | 0  |
| 30725770  | Wdr92    | WD repeat domain 92                                          | 0  | 1  | 0  |
| 148223079 | Wdr82    | WD repeat domain containing 82                               | 0  | 10 | 1  |
| 168480115 | Dcaf13   | WD repeats and SOF domain containing 1                       | 0  | 0  | 3  |
| 27229002  | Wdr45l   | Wdr45 like                                                   | 1  | 0  | 0  |

|           |               |                                                                        |   |   |    |
|-----------|---------------|------------------------------------------------------------------------|---|---|----|
| 171846235 | Wee2          | WEE1 homolog 2                                                         | 0 | 1 | 0  |
| 57862816  | Whrn          | whirlin isoform 2                                                      | 0 | 1 | 0  |
| 294979205 | Wiz           | widely-interspaced zinc finger motifs isoform 2                        | 0 | 2 | 7  |
| 15809010  | Wbscr16       | Williams-Beuren syndrome chromosome region 16 homolog                  | 0 | 1 | 0  |
| 125988405 | Wbscr22       | Williams-Beuren syndrome critical region protein 22                    | 1 | 0 | 0  |
| 165377291 | Wtap          | Wilms' tumour 1-associating protein isoform a                          | 0 | 4 | 0  |
| 46909567  | Wnt5a         | wingless-related MMTV integration site 5A                              | 0 | 1 | 0  |
| 6678169   | Wnt8a         | wingless-related MMTV integration site 8A                              | 0 | 0 | 1  |
| 100815493 | Wapal         | wings apart-like homolog                                               | 0 | 6 | 0  |
| 37537556  | Wipf2         | Wire protein                                                           | 0 | 1 | 0  |
| 6678581   | Was           | Wiskott-Aldrich syndrome homolog                                       | 0 | 0 | 1  |
| 268370042 | Wasl          | Wiskott-Aldrich syndrome-like                                          | 3 | 0 | 0  |
| 312283631 | Wnk1          | WNK lysine deficient protein kinase 1                                  | 1 | 0 | 0  |
| 295424169 | Whsc1         | Wolf-Hirschhorn syndrome candidate 1                                   | 0 | 1 | 0  |
| 124486903 | Whsc1l1       | Wolf-Hirschhorn syndrome candidate 1-like 1 isoform 2                  | 1 | 1 | 1  |
| 33859652  | Whsc2         | Wolf-Hirschhorn syndrome candidate 2 homolog                           | 0 | 1 | 0  |
| 6755997   | Wfs1          | Wolfram syndrome 1 protein homolog                                     | 5 | 0 | 1  |
| 46402183  | Wtip          | WT1-interacting protein                                                | 0 | 1 | 0  |
| 267844920 | Wbp11         | WW domain binding protein 11                                           | 0 | 9 | 1  |
| 8394539   | Wbp2          | WW domain binding protein 2                                            | 2 | 0 | 0  |
| 115495457 | Wbp7          | WW domain binding protein 7                                            | 0 | 0 | 1  |
| 226371675 | Wac           | WW domain containing adaptor with coiled-coil isoform 1                | 0 | 1 | 0  |
| 77682555  | Xdh           | xanthine dehydrogenase                                                 | 0 | 0 | 1  |
| 121247429 | Xpc           | xeroderma pigmentosum, complementation group C                         | 0 | 3 | 0  |
| 66841385  | Xirp2         | xin actin-binding repeat containing 2 isoform 1                        | 1 | 0 | 2  |
| 13385660  | Xab2          | XPA binding protein 2                                                  | 0 | 3 | 19 |
| 76563952  | Rexo4         | XPMC2 prevents mitotic catastrophe 2 homolog                           | 0 | 1 | 0  |
| 42476274  | Xpnpep1       | X-prolyl aminopeptidase (aminopeptidase P) 1, soluble                  | 6 | 0 | 0  |
| 28893421  | Xpnpep3       | X-prolyl aminopeptidase (aminopeptidase P) 3, putative                 | 1 | 2 | 1  |
| 256000811 | Xrra1         | X-ray radiation resistance associated 1                                | 0 | 1 | 0  |
| 170295844 | Xrcc1         | X-ray repair complementing defective repair in Chinese hamster cells 1 | 2 | 1 | 1  |
| 160333605 | Xrcc5         | X-ray repair complementing defective repair in Chinese hamster cells 5 | 3 | 7 | 0  |
| 145587104 | Xrcc6         | X-ray repair complementing defective repair in Chinese hamster cells 6 | 4 | 3 | 0  |
| 114205437 | 4933407N01Rik | XTP3-transactivated protein B                                          | 1 | 0 | 0  |
| 117956377 | Ybx2          | Y box protein 2                                                        | 4 | 3 | 2  |
| 62234443  | Ino80         | yeast INO80-like protein                                               | 0 | 1 | 0  |
| 225543566 | Yeats2        | YEATS domain containing 2 isoform 1                                    | 1 | 3 | 0  |
| 13386064  | Yeats4        | YEATS domain containing 4                                              | 0 | 3 | 0  |
| 283945493 | Yap1          | yes-associated protein 1                                               | 1 | 0 | 0  |
| 28076889  | Yipf4         | Yip1 domain family, member 4                                           | 1 | 0 | 0  |
| 25282409  | Yif1a         | Yip1p-interacting factor                                               | 2 | 0 | 1  |
| 31543971  | Ykt6          | YKT6 v-SNARE protein                                                   | 0 | 0 | 3  |
| 146134507 | Ylpm1         | YLP motif containing 1                                                 | 0 | 1 | 3  |
| 7305635   | Yme1l1        | YME1-like 1                                                            | 5 | 0 | 0  |
| 124430549 | Ythdc1        | YTH domain containing 1                                                | 0 | 0 | 1  |
| 225543495 | Ythdf3        | YTH domain family 3 isoform 1                                          | 1 | 1 | 0  |
| 40254385  | Yaf2          | YY1 associated factor 2                                                | 0 | 1 | 1  |
| 31982421  | Yy1           | YY1 transcription factor                                               | 0 | 8 | 0  |
| 29244006  | Zfp595        | zin finger protein 595                                                 | 0 | 1 | 0  |
| 113205051 | Znrf4         | zinc and ring finger 4                                                 | 1 | 0 | 0  |



|           |          |                                                         |   |   |   |
|-----------|----------|---------------------------------------------------------|---|---|---|
| 31559926  | Zadh2    | zinc binding alcohol dehydrogenase, domain containing 2 | 4 | 0 | 0 |
| 30520189  | Zbtb1    | zinc finger and BTB domain containing 1                 | 0 | 0 | 1 |
| 171919772 | Zbtb17   | zinc finger and BTB domain containing 17                | 0 | 1 | 0 |
| 226423893 | Zbtb2    | zinc finger and BTB domain containing 2                 | 0 | 1 | 0 |
| 257196201 | Zbtb20   | zinc finger and BTB domain containing 20                | 0 | 1 | 3 |
| 85701534  | Zbtb45   | zinc finger and BTB domain containing 45                | 0 | 1 | 0 |
| 117647238 | Zbtb7a   | zinc finger and BTB domain containing 7                 | 0 | 7 | 0 |
| 109627663 | Zhx1     | zinc finger and homeodomain protein 1                   | 0 | 6 | 0 |
| 153791380 | Zscan10  | zinc finger and SCAN domains 10                         | 0 | 1 | 0 |
| 115270986 | Zc3h11a  | zinc finger CCCH type containing 11A                    | 1 | 8 | 2 |
| 26006471  | Zc3h3    | zinc finger CCCH type containing 3                      | 1 | 0 | 0 |
| 156717216 | Zc3h6    | zinc finger CCCH type containing 6                      | 1 | 0 | 0 |
| 227116322 | Zc3hav1  | zinc finger CCCH type, antiviral 1 isoform 2            | 1 | 0 | 2 |
| 231571026 | Zc3h14   | zinc finger CCCH-type containing 14 isoform a           | 0 | 0 | 5 |
| 161169020 | Zc3h4    | zinc finger CCCH-type containing 4                      | 1 | 1 | 0 |
| 27369640  | Zc3hav1l | zinc finger CCCH-type, antiviral 1-like                 | 0 | 0 | 1 |
| 21313088  | Zcrb1    | zinc finger CCHC-type and RNA binding motif 1           | 0 | 2 | 1 |
| 125656178 | Zfhx4    | zinc finger homeodomain 4                               | 1 | 0 | 1 |
| 13195658  | Zfpl1    | zinc finger like protein 1                              | 1 | 1 | 1 |
| 119120797 | Zfp101   | zinc finger protein 101                                 | 1 | 0 | 0 |
| 113374173 | Zfp105   | zinc finger protein 105                                 | 1 | 0 | 0 |
| 27804329  | Zfp11    | zinc finger protein 11                                  | 1 | 0 | 0 |
| 33504487  | Zfp113   | zinc finger protein 113                                 | 1 | 0 | 0 |
| 27777687  | Zfp13    | zinc finger protein 13                                  | 0 | 0 | 1 |
| 121247390 | Zfp143   | zinc finger protein 143                                 | 0 | 1 | 0 |
| 6756049   | Zfp148   | zinc finger protein 148                                 | 0 | 3 | 0 |
| 157823865 | Zfp185   | zinc finger protein 185 isoform a                       | 0 | 3 | 1 |
| 47059078  | Zfp191   | zinc finger protein 191                                 | 0 | 0 | 1 |
| 37595742  | Zmym2    | zinc finger protein 198                                 | 0 | 1 | 0 |
| 194328717 | Zfp207   | zinc finger protein 207 isoform 1                       | 0 | 5 | 0 |
| 225007600 | Zfp212   | Zinc finger protein 212 isoform 1                       | 0 | 1 | 0 |
| 225543502 | Zfp219   | zinc finger protein 219                                 | 0 | 1 | 1 |
| 167555112 | Zmym4    | zinc finger protein 262                                 | 0 | 1 | 0 |
| 158749569 | Zfp280b  | zinc finger protein 280b                                | 0 | 1 | 0 |
| 157823982 | Zfp318   | zinc finger protein 318 isoform 2                       | 1 | 0 | 0 |
| 56118256  | Zfp324   | zinc finger protein 324                                 | 0 | 1 | 0 |
| 269784644 | Zfp326   | zinc finger protein 326                                 | 0 | 2 | 6 |
| 6754396   | Zfp346   | zinc finger protein 346                                 | 0 | 4 | 0 |
| 238859639 | Zfp352   | zinc finger protein 352                                 | 0 | 0 | 1 |
| 154350211 | Zfp369   | zinc finger protein 369                                 | 1 | 0 | 0 |
| 124486594 | Zfp382   | zinc finger protein 382                                 | 0 | 0 | 1 |
| 62526050  | Zfp386   | zinc finger protein 386 (Kruppel-like) isoform b        | 1 | 0 | 0 |
| 113865966 | Zfp397   | zinc finger protein 397                                 | 0 | 0 | 1 |
| 139949213 | Ggnbp2   | zinc finger protein 403                                 | 1 | 0 | 0 |
| 124339857 | Zfp418   | zinc finger protein 418                                 | 0 | 1 | 0 |
| 28076891  | Zfp422   | zinc finger protein 422                                 | 0 | 0 | 5 |
| 46359077  | Zfp423   | zinc finger protein 423                                 | 0 | 2 | 0 |
| 257467538 | Zfp438   | zinc finger protein 438                                 | 0 | 0 | 1 |
| 29789329  | Zfp451   | zinc finger protein 451                                 | 0 | 0 | 1 |
| 123702020 | Zfp456   | zinc finger protein 456                                 | 0 | 1 | 0 |
| 114431238 | Zfp462   | zinc finger protein 462                                 | 0 | 2 | 0 |
| 194394231 | Zfp507   | zinc finger protein 507                                 | 1 | 0 | 1 |
| 254553392 | Zfp512   | zinc finger protein 512                                 | 0 | 4 | 2 |

|           |          |                                                     |   |    |   |
|-----------|----------|-----------------------------------------------------|---|----|---|
| 294489298 | Zfp516   | zinc finger protein 516                             | 0 | 1  | 1 |
| 295444874 | Zfp518b  | zinc finger protein 518B                            | 0 | 1  | 0 |
| 7305637   | Zfp53    | zinc finger protein 53                              | 1 | 0  | 0 |
| 46402263  | Zfp532   | zinc finger protein 532                             | 0 | 1  | 0 |
| 27369509  | Zfp536   | zinc finger protein 536                             | 2 | 0  | 0 |
| 270341364 | Zfp574   | zinc finger protein 574                             | 1 | 0  | 0 |
| 154759288 | Zfp593   | zinc finger protein 593                             | 0 | 1  | 0 |
| 34147169  | Zfp598   | zinc finger protein 598                             | 1 | 0  | 0 |
| 242397406 | Zfp618   | zinc finger protein 618                             | 0 | 1  | 0 |
| 160333308 | Zfp619   | zinc finger protein 619                             | 0 | 0  | 1 |
| 21313506  | Zfp623   | zinc finger protein 623                             | 1 | 0  | 0 |
| 28893273  | Zfp629   | zinc finger protein 629                             | 0 | 1  | 0 |
| 30424631  | Zfp641   | zinc finger protein 641                             | 0 | 0  | 1 |
| 46358380  | Zfp646   | zinc finger protein 646                             | 0 | 1  | 0 |
| 126723513 | Zfp664   | zinc finger protein 664                             | 0 | 1  | 0 |
| 27229259  | Zfp687   | zinc finger protein 687                             | 0 | 4  | 0 |
| 225543087 | Zfp691   | zinc finger protein 691                             | 0 | 1  | 0 |
| 100817090 | Zfp692   | zinc finger protein 692                             | 0 | 0  | 1 |
| 18875370  | Zfp704   | zinc finger protein 704                             | 1 | 1  | 1 |
| 21312658  | Zfp706   | zinc finger protein 706                             | 0 | 2  | 0 |
| 125347348 | Zfp711   | zinc finger protein 711                             | 0 | 0  | 1 |
| 123173818 | Zfp715   | zinc finger protein 715                             | 1 | 0  | 1 |
| 187608595 | Zfp735   | zinc finger protein 735                             | 1 | 0  | 0 |
| 161353500 | Zfp74    | zinc finger protein 74                              | 1 | 0  | 0 |
| 119226195 | Zfp759   | zinc finger protein 759                             | 0 | 1  | 1 |
| 29789173  | Zfp788   | zinc finger protein 788                             | 0 | 1  | 0 |
| 32469497  | Zfp828   | zinc finger protein 828                             | 0 | 1  | 0 |
| 31560213  | Zfp830   | zinc finger protein 830                             | 0 | 1  | 1 |
| 22165394  | Zfp87    | zinc finger protein 87                              | 0 | 0  | 1 |
| 140969612 | Zfp871   | zinc finger protein 871                             | 0 | 1  | 0 |
| 90669983  | Zfp91    | zinc finger protein 91                              | 0 | 3  | 1 |
| 21704232  | Zfp810   | zinc finger protein ZFP                             | 0 | 0  | 1 |
| 122114637 | lkzf4    | zinc finger protein, subfamily 1A, 4                | 0 | 0  | 1 |
| 168480106 | Zfr      | zinc finger RNA binding protein                     | 0 | 31 | 2 |
| 194473741 | Zkscan17 | zinc finger with KRAB and SCAN domains 17 isoform 1 | 0 | 1  | 0 |
| 124486745 | Zkscan2  | zinc finger with KRAB and SCAN domains 2            | 1 | 1  | 0 |
| 224809352 | Zkscan3  | zinc finger with KRAB and SCAN domains 3            | 0 | 1  | 0 |
| 27370072  | Zc3hc1   | zinc finger, C3HC type 1                            | 0 | 1  | 0 |
| 51491858  | Zc4h2    | zinc finger, C4H2 domain containing                 | 0 | 1  | 1 |
| 114326528 | Zgpat    | zinc finger, CCCH-type with G patch domain          | 0 | 0  | 1 |
| 27754058  | Zcchc10  | zinc finger, CCHC domain containing 10              | 0 | 0  | 1 |
| 83977461  | Zcchc11  | zinc finger, CCHC domain containing 11              | 0 | 0  | 1 |
| 170016071 | Zcchc2   | zinc finger, CCHC domain containing 2 isoform B     | 0 | 0  | 1 |
| 169808385 | Zcchc8   | zinc finger, CCHC domain containing 8               | 1 | 5  | 2 |
| 21450253  | Zdhhc5   | zinc finger, DHHC domain containing 5               | 0 | 0  | 2 |
| 112818584 | Zfyve26  | zinc finger, FYVE domain containing 26              | 1 | 0  | 0 |
| 58037197  | Znhit1   | zinc finger, HIT domain containing 1                | 0 | 2  | 0 |
| 124487366 | Znhit6   | zinc finger, HIT type 6                             | 0 | 1  | 0 |
| 13385046  | Zmat2    | zinc finger, matrin type 2                          | 0 | 0  | 1 |
| 28893005  | Zmat4    | zinc finger, matrin type 4                          | 0 | 1  | 0 |
| 49227135  | Zmym1    | zinc finger, MYM domain containing 1                | 1 | 0  | 0 |
| 140972030 | Zmym5    | zinc finger, MYM-type 5                             | 0 | 0  | 1 |
| 91064878  | Zmynd8   | zinc finger, MYND-type containing 8                 | 0 | 4  | 1 |
| 74315981  | Zranb2   | zinc finger, RAN-binding domain containing 2        | 0 | 1  | 0 |

|           |         |                                       |   |   |   |
|-----------|---------|---------------------------------------|---|---|---|
| 71361674  | Zswim5  | zinc finger, SWIM domain containing 5 | 1 | 0 | 0 |
| 124053451 | Zzz3    | zinc finger, ZZ domain containing 3   | 0 | 9 | 0 |
| 40254321  | Zhx3    | zinc fingers and homeoboxes 3         | 0 | 7 | 0 |
| 40789094  | Zhx2    | zinc fingers and homeoboxes protein 2 | 0 | 1 | 0 |
| 12963579  | Slc30a7 | zinc transporter like 2               | 2 | 0 | 0 |
| 6756081   | Zp2     | zona pellucida glycoprotein 2         | 1 | 0 | 0 |
| 256665241 | Zan     | zonadhesin                            | 1 | 0 | 0 |
| 6756085   | Zyx     | zyxin                                 | 1 | 0 | 0 |

Suppl. Tab. 3

| GI Accession No. | Gene Symbol | Protein Name                                                                          | Location | Transcriptome match |
|------------------|-------------|---------------------------------------------------------------------------------------|----------|---------------------|
| 86604724         | Atf1        | activating transcription factor 1                                                     | NE       | Yes                 |
| 68799916         | Atf2        | activating transcription factor 2 isoform 1                                           | NE       | Yes                 |
| 22122557         | Atf7        | activating transcription factor 7                                                     | NE       | No                  |
| 7304901          | Ar          | androgen receptor                                                                     | NE       | No                  |
| 9790013          | Aatf        | apoptosis antagonizing transcription factor                                           | NP       | Yes                 |
| 110225364        | Zfhx3       | AT motif binding factor 1                                                             | NE       | Yes                 |
| 110225364        | Zfhx3       | AT motif binding factor 1                                                             | NE       | Yes                 |
| 6753020          | Aire        | autoimmune regulator (autoimmune polyendocrinopathy candidiasis ectodermal dystrophy) | NE       | No                  |
| 31982053         | Relb        | avian reticuloendotheliosis viral (v-rel) oncogene related B                          | NP       | No                  |
| 6755680          | Bhlhe40     | basic helix-loop-helix family, member e40                                             | NP       | Yes                 |
| 70906449         | Bclaf1      | BCL2-associated transcription factor 1 isoform 2                                      | NE, NP   | Yes                 |
| 46559391         | Bmi1        | Bmi1 polycomb ring finger oncogene                                                    | NE       | Yes                 |
| 161016835        | Brc1        | breast cancer 1                                                                       | NP       | Yes                 |
| 164698417        | Brd1        | bromodomain containing 1                                                              | NP       | Yes                 |
| 31542251         | C1d         | C1D nuclear receptor co-repressor                                                     | NE       | Yes                 |
| 30017453         | Camta2      | calmodulin binding transcription activator 2                                          | NP       | Yes                 |
| 158966707        | Creb1       | cAMP responsive element binding protein 1 isoform A                                   | NE       | Yes                 |
| 172072595        | Casp8ap2    | caspase 8 associated protein 2                                                        | NP       | Yes                 |
| 6753404          | Cebpb       | CCAAT/enhancer binding protein beta                                                   | NE, NP   | Yes                 |
| 61966683         | Cebpg       | CCAAT/enhancer binding protein gamma                                                  | NE       | Yes                 |
| 67188876         | Cebpz       | CCAAT/enhancer binding protein zeta                                                   | NE, NP   | Yes                 |
| 31044459         | Ctcf        | CCCTC-binding factor                                                                  | NE, NP   | Yes                 |
| 22779899         | Cdc5l       | cell division cycle 5-like                                                            | NE, NP   | Yes                 |
| 51093870         | Foxn3       | checkpoint suppressor 1                                                               | NE       | No                  |
| 84871978         | Mycbp       | c-myc binding protein                                                                 | NE       | Yes                 |
| 115270977        | Med14       | cofactor required for Sp1 transcriptional activation, subunit 2 isoform b             | NE       | No                  |
| 47059495         | Csda        | cold shock domain protein A short isoform                                             | NE, NP   | Yes                 |
| 7304971          | Cops5       | COP9 signalosome subunit 5                                                            | NE, NP   | Yes                 |
| 70995311         | Crebbp      | CREB binding protein                                                                  | NE       | Yes                 |
| 311893328        | Ctbp1       | C-terminal binding protein 1                                                          | NE       | Yes                 |
| 282721029        | Ctbp2       | C-terminal binding protein 2                                                          | NE       | Yes                 |
| 110835729        | Cux1        | cut-like homeobox 1 isoform b                                                         | NE       | Yes                 |
| 110835729        | Cux2        | cut-like homeobox 1 isoform b                                                         | NE       | Yes                 |
| 172072638        | Ccnc        | cyclin C isoform 1                                                                    | NE       | No                  |
| 56550069         | Ccnt2       | cyclin T2                                                                             | NP       | Yes                 |
| 6755314          | Dpf2        | D4, zinc and double PHD fingers family 2                                              | NE, NP   | Yes                 |
| 257900506        | Dcp1b       | DCP1 decapping enzyme homolog b                                                       | NE       | No                  |
| 8393248          | Deaf1       | deformed epidermal autoregulatory factor 1                                            | NE       | No                  |
| 31981174         | Pole3       | DNA-directed DNA polymerase epsilon 3                                                 | NE       | Yes                 |
| 27754097         | Dr1         | down-regulator of transcription 1                                                     | NE       | Yes                 |
| 21313424         | Drap1       | Dr1 associated protein 1 (negative cofactor 2 alpha)                                  | NE       | Yes                 |
| 94421034         | Ep300       | E1A binding protein p300                                                              | NE       | Yes                 |
| 257153394        | Ets2        | E26 avian leukemia oncogene 2, 3' domain                                              | NE       | Yes                 |
| 6679627          | Elf1        | E74-like factor 1                                                                     | NE       | Yes                 |
| 253683411        | Elf3        | E74-like factor 3 isoform 2                                                           | NE, NP   | Yes                 |
| 153792362        | Elk4        | ELK4, member of ETS oncogene family                                                   | NE       | Yes                 |
| 10946942         | Edf1        | endothelial differentiation-related factor 1                                          | NE       | Yes                 |

|           |               |                                                                        |        |     |
|-----------|---------------|------------------------------------------------------------------------|--------|-----|
| 6679685   | Erh           | enhancer of rudimentary homolog                                        | NE, NP | Yes |
| 166706895 | Tox4          | epidermal Langerhans cell protein LCP1                                 | NE     | Yes |
| 6755100   | Pa2g4         | ErbB3-binding protein 1                                                | NE     | Yes |
| 112293262 | Esrra         | estrogen related receptor, alpha                                       | NE, NP | Yes |
| 226958367 | Esrrb         | estrogen-related receptor beta isoform 1                               | NE, NP | Yes |
| 6681287   | Ehf           | ets homologous factor                                                  | NE     | Yes |
| 84370337  | Etv6          | ets variant 6                                                          | NE     | Yes |
| 18079341  | Eif3h         | eukaryotic translation initiation factor 3, subunit H                  | NE     | No  |
| 253795477 | Fblim1        | filamin binding LIM protein 1                                          | NP     | Yes |
| 226693376 | Foxj1         | forkhead box J1                                                        | NE     | No  |
| 82546826  | Foxk1         | forkhead box K1                                                        | NE     | Yes |
| 116517340 | Fhl1          | four and a half LIM domains 1 isoform 2                                | NP     | Yes |
| 34328119  | Gabpa         | GA repeat binding protein, alpha                                       | NE, NP | Yes |
| 46575942  | Gabpb1        | GA repeat binding protein, beta 1 isoform a                            | NE     | Yes |
| 6679951   | Gata3         | GATA binding protein 3                                                 | NP     | Yes |
| 87299617  | Gtf2a2        | general transcription factor II A, 2                                   | NE     | Yes |
| 21312660  | Gtf2e1        | general transcription factor II E, polypeptide 1 (alpha subunit)       | NE     | Yes |
| 268838784 | Gtf2e2        | general transcription factor II E, polypeptide 2 (beta subunit)        | NE     | Yes |
| 188035919 | Gtf2h1        | general transcription factor II H, polypeptide 1                       | NE     | Yes |
| 6754094   | Gtf2h4        | general transcription factor II H, polypeptide 4                       | NE     | Yes |
| 125625345 | Gtf2ird1      | general transcription factor II I repeat domain-containing 1 isoform a | NP     | Yes |
| 20270031  | Gtf2f1        | general transcription factor IIF, polypeptide 1                        | NE     | Yes |
| 39930425  | Gtf2f2        | general transcription factor IIF, polypeptide 2                        | NE     | Yes |
| 31088894  | Gtf2h3        | general transcription factor IIH, polypeptide 3                        | NE     | Yes |
| 75677510  | Gtf3c3        | general transcription factor IIIC, polypeptide 3                       | NE, NP | Yes |
| 90186273  | Gli1          | GLI family zinc finger 1                                               | NE     | No  |
| 113866026 | Glis3         | GLIS family zinc finger 3                                              | NE     | Yes |
| 238637263 | Grlh1         | grainyhead-like 1 isoform 2                                            | NE     | No  |
| 6680201   | Hdgfrp2       | hepatoma-derived growth factor-related protein 2                       | NE, NP | Yes |
| 270132746 | Hbp1          | high mobility group box transcription factor 1 isoform 1               | NP     | Yes |
| 6754232   | Hoxa5         | homeo box A5                                                           | NE     | Yes |
| 160358780 | Hoxb5         | homeo box B5                                                           | NE     | Yes |
| 88014652  | Hoxb7         | homeo box B7                                                           | NP     | No  |
| 21362265  | Hoxb8         | homeo box B8                                                           | NE     | Yes |
| 158508520 | Hoxd4         | homeo box D4                                                           | NE     | Yes |
| 154800435 | Hoxc4         | homeobox C4                                                            | NP     | No  |
| 124107625 | Hivep3        | human immunodeficiency virus type I enhancer binding protein 3         | NE, NP | No  |
| 70887767  | Hic2          | hypermethylated in cancer 2                                            | NE, NP | Yes |
| 94364689  | LOC674913     | hypothetical protein                                                   | NP     | No  |
| 159110675 | A630033E08Rik | hypothetical protein LOC240041 isoform b                               | NE     | Yes |
| 22122835  | BC031441      | hypothetical protein LOC240120                                         | NP     | No  |
| 141801938 | D330038O06Rik | hypothetical protein LOC330788                                         | NP     | Yes |
| 50284537  | BC049807      | hypothetical protein LOC381066                                         | NE     | Yes |
| 142383655 | BC066028      | hypothetical protein LOC407812                                         | NP     | No  |
| 70778924  | 4930432O21Rik | hypothetical protein LOC74670                                          | NP     | Yes |
| 31982165  | Ikzf5         | IKAROS family zinc finger 5                                            | NP     | Yes |
| 19111152  | Ing4          | inhibitor of growth family, member 4                                   | NE, NP | Yes |
| 19111152  | Ing4          | inhibitor of growth family, member 4                                   | NE, NP | Yes |
| 21313552  | Ing5          | inhibitor of growth family, member 5                                   | NP     | Yes |

|           |         |                                                                                                 |        |     |
|-----------|---------|-------------------------------------------------------------------------------------------------|--------|-----|
| 21313552  | Ing5    | inhibitor of growth family, member 5                                                            | NP     | Yes |
| 162287051 | Irf2    | interferon regulatory factor 2                                                                  | NE     | Yes |
| 114145467 | Irf6    | interferon regulatory factor 6                                                                  | NE     | Yes |
| 13385872  | Ilf2    | interleukin enhancer binding factor 2                                                           | NE, NP | Yes |
| 334724461 | Jmjd1c  | jumonji domain containing 1C                                                                    | NE     | Yes |
| 226958545 | Jarid1a | jumonji, AT rich interactive domain 1A (Rbp2 like) isoform 1                                    | NE, NP | Yes |
| 6754404   | Jund    | jun D proto-oncogene                                                                            | NE     | No  |
| 144922690 | Klf16   | Kruppel-like factor 16                                                                          | NE     | Yes |
| 170784840 | Klf2    | Kruppel-like factor 2 (lung)                                                                    | NE     | Yes |
| 19527168  | Psp1    | lens epithelium-derived growth factor                                                           | NE     | Yes |
| 258679524 | Lrrrip2 | leucine rich repeat (in FLII) interacting protein 2                                             | NE     | Yes |
| 239937458 | Lmo4    | LIM domain only 4                                                                               | NE     | Yes |
| 6678688   | Lhx1    | LIM homeobox protein 1                                                                          | NE     | Yes |
| 6678688   | Lhx1    | LIM homeobox protein 1                                                                          | NE     | Yes |
| 31543224  | Smad4   | MAD homolog 4                                                                                   | NE     | Yes |
| 57222238  | Bud31   | maternal G10 transcript                                                                         | NE, NP | Yes |
| 226051848 | Max     | Max protein isoform 1                                                                           | NE     | Yes |
| 125628662 | Med12   | mediator complex subunit 12                                                                     | NE     | Yes |
| 21450345  | Med17   | mediator complex subunit 17                                                                     | NE     | No  |
| 89363038  | Mnat1   | menage a trois 1                                                                                | NE     | Yes |
| 295844817 | Mitf    | microphthalmia-associated transcription factor isoform 2                                        | NE     | No  |
| 85540473  | Morf4l1 | mortality factor 4 like 1 isoform b                                                             | NE     | Yes |
| 146134497 | Mpnd    | MPN domain containing                                                                           | NE     | Yes |
| 6754740   | Msc     | musculin                                                                                        | NE, NP | No  |
| 114155153 | Maz     | MYC-associated zinc finger protein                                                              | NE     | Yes |
| 47271507  | Mllt10  | myeloid/lymphoid or mixed-lineage leukemia (trithorax homolog, Drosophila); translocated to, 10 | NP     | Yes |
| 76253934  | Mef2a   | myocyte enhancer factor 2A                                                                      | NE     | Yes |
| 21312790  | Myst1   | MYST histone acetyltransferase 1                                                                | NE     | No  |
| 303521989 | Myst2   | MYST histone acetyltransferase 2                                                                | NE, NP | Yes |
| 84579827  | Gnptab  | N-acetylglucosamine-1-phosphate transferase                                                     | NE, NP | Yes |
| 6671587   | Neurod4 | neurogenic differentiation 4                                                                    | NP     | No  |
| 194440738 | Nfe2l1  | nuclear factor erythroid 2-like 1 isoform 1                                                     | NE     | Yes |
| 117606364 | Nfkb1   | nuclear factor kappa-B, subunit 1                                                               | NE, NP | Yes |
| 270047510 | Nfatc4  | nuclear factor of activated T-cells, cytoplasmic, calcineurin-dependent 4                       | NE     | No  |
| 40254249  | Nfrkb   | nuclear factor related to kappaB binding protein                                                | NE     | Yes |
| 118026944 | Ncoa2   | nuclear receptor coactivator 2 isoform a                                                        | NP     | Yes |
| 119226235 | Ncor2   | nuclear receptor co-repressor 2                                                                 | NE     | Yes |
| 6671531   | Nr0b1   | nuclear receptor subfamily 0, group B, member 1                                                 | NE     | No  |
| 170650696 | Nr1h5   | nuclear receptor subfamily 1, group H, member 5 isoform 2                                       | NE     | No  |
| 73611910  | Nr2f2   | nuclear receptor subfamily 2, group F, member 2 isoform 1                                       | NE     | Yes |
| 112807199 | Nr2f6   | nuclear receptor subfamily 2, group F, member 6                                                 | NE     | Yes |
| 121247453 | Nr3c1   | nuclear receptor subfamily 3, group C, member 1                                                 | NP     | Yes |
| 6754216   | Nr4a1   | nuclear receptor subfamily 4, group A, member 1                                                 | NP     | Yes |
| 7657397   | Nr4a3   | nuclear receptor subfamily 4, group A, member 3                                                 | NE     | No  |
| 161016831 | Nfyb    | nuclear transcription factor Y, alpha isoform b                                                 | NE     | Yes |
| 6754850   | Nfyb    | nuclear transcription factor-Y beta                                                             | NE     | Yes |
| 113205059 | Ybx1    | nuclease sensitive element binding protein 1                                                    | NE, NP | Yes |
| 256574803 | Ocel1   | occludin/ELL domain containing 1                                                                | NP     | No  |

|           |               |                                                                                            |        |     |
|-----------|---------------|--------------------------------------------------------------------------------------------|--------|-----|
| 9910472   | Ovol1         | OVO homolog-like 1                                                                         | NE, NP | Yes |
| 326537335 | Pax2          | paired box gene 2                                                                          | NE     | No  |
| 6754990   | Pax8          | paired box gene 8                                                                          | NE     | Yes |
| 34368580  | Pknox1        | Pbx/knotted 1 homeobox                                                                     | NE     | Yes |
| 284005509 | Pwp1          | periodic tryptophan protein 1 homolog                                                      | NE     | Yes |
| 164663880 | Ppara         | peroxisome proliferator activated receptor alpha                                           | NP     | No  |
| 255522851 | Phf10         | PHD finger protein 10                                                                      | NE     | Yes |
| 198442868 | Phf12         | PHD finger protein 12                                                                      | NE     | Yes |
| 270288744 | Phf14         | PHD finger protein 14                                                                      | NE, NP | Yes |
| 40556368  | Phf16         | PHD finger protein 16                                                                      | NE     | No  |
| 194328769 | Phf17         | PHD finger protein 17                                                                      | NE, NP | Yes |
| 20982845  | Fus           | pigpen                                                                                     | NE, NP | Yes |
| 34610215  | Plagl2        | pleiomorphic adenoma gene-like 2                                                           | NP     | Yes |
| 160333703 | Kdm5b         | PLU1                                                                                       | NE, NP | Yes |
| 37574111  | Pcgf1         | polycomb group ring finger 1                                                               | NE     | No  |
| 28076973  | Pcgf6         | polycomb group ring finger 6                                                               | NE     | Yes |
| 31980927  | Pqbp1         | polyglutamine binding protein 1                                                            | NE, NP | Yes |
| 13385826  | Polr2g        | polymerase (RNA) II (DNA directed) polypeptide G                                           | NE, NP | Yes |
| 6679567   | Ptrf          | polymerase I and transcript release factor                                                 | NE     | Yes |
| 172073164 | Prdm1         | PR domain containing 1, with ZNF domain                                                    | NE     | No  |
| 34365779  | Pbx1          | pre B-cell leukemia transcription factor 1 isoform a                                       | NE     | Yes |
| 7949105   | Pbx3          | pre B-cell leukemia transcription factor 3                                                 | NP     | Yes |
| 6679573   | Pura          | purine rich element binding protein A                                                      | NE, NP | Yes |
| 6755252   | Purb          | purine rich element binding protein B                                                      | NE, NP | Yes |
| 295424118 | Rreb1         | ras responsive element binding protein 1 isoform 1                                         | NE     | Yes |
| 124286787 | Rbpj          | recombining binding protein suppressor of hairless isoform 1                               | NE     | Yes |
| 70980523  | Rfxank        | regulatory factor X-associated ankyrin-containing protein isoform 2                        | NE     | No  |
| 37694072  | Arid4b        | retinoblastoma binding protein 1-like 1 isoform 1                                          | NE     | Yes |
| 164450487 | Rbbp5         | retinoblastoma binding protein 5                                                           | NE     | Yes |
| 213417872 | Rbl1          | retinoblastoma-like protein 1 isoform 1                                                    | NE, NP | Yes |
| 6755384   | Rxra          | retinoid X receptor alpha                                                                  | NE     | Yes |
| 226958428 | Ring1         | ring finger protein 1                                                                      | NE     | Yes |
| 33563274  | Rnf2          | ring finger protein 2                                                                      | NE, NP | Yes |
| 38348308  | Rybp          | RING1 and YY1 binding protein                                                              | NE     | Yes |
| 6755364   | Sub1          | RNA polymerase II transcriptional coactivator                                              | NE, NP | Yes |
| 225690526 | Runx2         | runt related transcription factor 2 isoform type II                                        | NE, NP | No  |
| 9790083   | Ruvbl1        | RuvB-like protein 1                                                                        | NE, NP | Yes |
| 6755382   | Ruvbl2        | RuvB-like protein 2                                                                        | NE, NP | Yes |
| 153945866 | Safb2         | scaffold attachment factor B2                                                              | NE, NP | Yes |
| 148540184 | Srfbp1        | serum response factor binding protein 1                                                    | NE, NP | Yes |
| 30840984  | Smyd2         | SET and MYND domain containing 2                                                           | NE     | Yes |
| 309269554 | EG666542      | similar to EG210583 protein                                                                | NP     | No  |
| 94379513  | EG243866      | similar to hCG1645909                                                                      | NP     | No  |
| 325995159 | AI607873      | similar to interferon activated gene 204                                                   | NP     | No  |
| 309271358 | EG278181      | similar to KIAA0026                                                                        | NE, NP | No  |
| 256542283 | 4930403N07Rik | similar to LOC500668 protein                                                               | NE     | No  |
| 83029991  | EG625558      | similar to novel KRAB box containing protein                                               | NE     | No  |
| 254939609 | B230315N10Rik | similar to RIKEN cDNA B230315N10 gene isoform 1                                            | NE     | No  |
| 254028159 | Safb          | similar to Scaffold attachment factor B (Scaffold attachment factor B1) (SAF-B) isoform 18 | NE, NP | Yes |
| 27261820  | Snapc4        | small nuclear RNA activating complex, polypeptide 4                                        | NP     | No  |
| 20982839  | Satb2         | special AT-rich sequence binding protein 2                                                 | NE     | Yes |

|           |          |                                                                                  |        |     |
|-----------|----------|----------------------------------------------------------------------------------|--------|-----|
| 20982839  | Satb2    | special AT-rich sequence binding protein 2                                       | NE     | Yes |
| 160707947 | Sf1      | splicing factor 1 isoform 2                                                      | NE, NP | Yes |
| 6755650   | Spry1    | sprouty homolog 1                                                                | NE     | Yes |
| 77404392  | Snd1     | staphylococcal nuclease domain containing 1                                      | NE     | Yes |
| 209862973 | Ssrp1    | structure specific recognition protein 1 isoform 1                               | NE, NP | Yes |
| 209862973 | Ssrp1    | structure specific recognition protein 1 isoform 1                               | NE, NP | Yes |
| 154350222 | Supt16h  | suppressor of Ty 16 homolog                                                      | NE, NP | Yes |
| 6678181   | Supt4h1  | suppressor of Ty 4 homolog 1                                                     | NE     | Yes |
| 22094123  | Supt5h   | suppressor of Ty 5 homolog                                                       | NE, NP | Yes |
| 166091434 | Supt6h   | suppressor of Ty 6 homolog                                                       | NE, NP | Yes |
| 30794412  | Taf15    | TAF15 RNA polymerase II, TATA box binding protein (TBP)-associated factor        | NE, NP | Yes |
| 6678215   | Taf6     | TAF6 RNA polymerase II, TATA box binding protein (TBP)-associated factor         | NE     | Yes |
| 295317365 | Taf6l    | TAF6-like RNA polymerase II, p300/CBP-associated factor (PCAF)-associated factor | NE     | Yes |
| 62821772  | Taf9     | TAF9 RNA polymerase II, TATA box binding protein-associated factor isoform 1     | NE     | Yes |
| 269784727 | Taf9b    | TAF9-like RNA polymerase II, TATA box binding protein (TBP)-associated factor    | NE     | No  |
| 20270192  | Taf13    | TATA box-binding protein-associated factor, RNA polymerase II, K, 18kD           | NE     | Yes |
| 14030783  | Tbx19    | T-box 19                                                                         | NP     | No  |
| 156938285 | Tbx4     | T-box 4 isoform a                                                                | NE     | No  |
| 110665722 | Taf5     | Tbp-associated factor 5                                                          | NE     | Yes |
| 225735589 | Tdpoz1   | TD and POZ domain containing 1                                                   | NE     | No  |
| 6678275   | Tead1    | TEA domain family member 1                                                       | NE     | No  |
| 7106433   | Tead2    | TEA domain family member 2                                                       | NE     | Yes |
| 196049389 | Tead3    | TEA domain family member 3 isoform 2                                             | NE     | Yes |
| 19526976  | Dnttip1  | terminal deoxynucleotidyltransferase interacting factor 1                        | NE     | Yes |
| 68533246  | Thrap3   | thyroid hormone receptor associated protein 3                                    | NE, NP | Yes |
| 119226255 | Sp1      | trans-acting transcription factor 1                                              | NE     | Yes |
| 119226255 | Sp1      | trans-acting transcription factor 1                                              | NE     | Yes |
| 229094714 | Tcea1    | transcription elongation factor A (SII) 1 isoform 2                              | NE     | Yes |
| 6678235   | Tcea2    | transcription elongation factor A protein 2                                      | NE     | No  |
| 13385800  | Tceb2    | transcription elongation factor B (SIII), polypeptide 2                          | NE     | Yes |
| 87196334  | Tcerg1   | transcription elongation regulator 1                                             | NE     | Yes |
| 166295206 | Tcf12    | transcription factor 12                                                          | NE     | Yes |
| 111185898 | Tcf15    | transcription factor 15                                                          | NE     | No  |
| 70609885  | Tcfap2b  | transcription factor AP-2 beta isoform 1                                         | NE, NP | No  |
| 171846238 | Tcfap2a  | transcription factor AP-2, alpha isoform a                                       | NE, NP | Yes |
| 23346597  | Tcfap2d  | transcription factor AP-2, delta                                                 | NE     | No  |
| 120444920 | Tcfap2e  | transcription factor AP-2, epsilon                                               | NE, NP | No  |
| 228008354 | Tcfap2c  | transcription factor AP-2, gamma isoform 1                                       | NE     | No  |
| 13626034  | Tcfap4   | transcription factor AP4                                                         | NE     | Yes |
| 15628025  | Tcfcp2   | transcription factor CP2                                                         | NE     | Yes |
| 46810275  | Grhl2    | transcription factor CP2-like 3                                                  | NE     | Yes |
| 157384992 | Tcf3     | transcription factor E3 isoform a                                                | NE     | Yes |
| 295789156 | Prdm16   | transcription factor MEL1                                                        | NE, NP | No  |
| 70608137  | Brf1     | transcription initiation factor IIIB                                             | NP     | Yes |
| 134053939 | Tcfcp2l1 | transcription repressor CRTR-1                                                   | NE     | Yes |
| 76253678  | Med27    | transcriptional co-activator CRSP8 homolog                                       | NE     | No  |
| 160333360 | Sin3a    | transcriptional regulator, SIN3A isoform 1                                       | NE, NP | Yes |
| 160333077 | Trp53bp1 | transformation related protein 53 binding protein 1                              | NE, NP | Yes |



|           |         |                                                                   |        |     |
|-----------|---------|-------------------------------------------------------------------|--------|-----|
| 187960040 | Trp53   | transformation related protein 53 isoform a                       | NE     | Yes |
| 170295840 | Trim28  | tripartite motif protein 28                                       | NE, NP | Yes |
| 119637830 | Trim33  | tripartite motif protein 33 isoform 1                             | NE, NP | Yes |
| 94420998  | Trim24  | tripartite motif-containing 24                                    | NP     | Yes |
| 162287241 | Uhrf1   | ubiquitin-like with PHD and ring finger domains 1 isoform A       | NE     | Yes |
| 134032032 | Ubp1    | upstream binding protein 1 isoform b                              | NE     | Yes |
| 113205057 | Ubtf    | upstream binding transcription factor, RNA polymerase I isoform 1 | NE, NP | Yes |
| 21450209  | Utp6    | UTP6, small subunit (SSU) processome component, homolog           | NE, NP | Yes |
| 117414176 | Vezf1   | vascular endothelial zinc finger 1                                | NE     | Yes |
| 6755957   | Vax2    | ventral anterior homeobox containing gene 2                       | NE     | No  |
| 6754608   | Maff    | v-maf musculoaponeurotic fibrosarcoma oncogene family, protein F  | NE     | Yes |
| 6754610   | Mafg    | v-maf musculoaponeurotic fibrosarcoma oncogene family, protein G  | NE     | Yes |
| 6754612   | Mafk    | v-maf musculoaponeurotic fibrosarcoma oncogene family, protein K  | NE, NP | Yes |
| 46402183  | Wtip    | WT1-interacting protein                                           | NE     | Yes |
| 13385660  | Xab2    | XPA binding protein 2                                             | NE, NP | Yes |
| 117956377 | Ybx2    | Y box protein 2                                                   | NE, NP | No  |
| 40254385  | Yaf2    | YY1 associated factor 2                                           | NE, NP | Yes |
| 31982421  | Yy1     | YY1 transcription factor                                          | NE     | Yes |
| 29244006  | Zfp595  | zinc finger protein 595                                           | NE     | No  |
| 30520189  | Zbtb1   | zinc finger and BTB domain containing 1                           | NP     | Yes |
| 171919772 | Zbtb17  | zinc finger and BTB domain containing 17                          | NE     | No  |
| 226423893 | Zbtb2   | zinc finger and BTB domain containing 2                           | NE     | Yes |
| 257196201 | Zbtb20  | zinc finger and BTB domain containing 20                          | NE, NP | Yes |
| 85701534  | Zbtb45  | zinc finger and BTB domain containing 45                          | NE     | No  |
| 117647238 | Zbtb7a  | zinc finger and BTB domain containing 7                           | NE     | No  |
| 109627663 | Zhx1    | zinc finger and homeodomain protein 1                             | NE     | Yes |
| 109627663 | Zhx1    | zinc finger and homeodomain protein 1                             | NE     | Yes |
| 153791380 | Zscan10 | zinc finger and SCAN domains 10                                   | NE     | No  |
| 115270986 | Zc3h11a | zinc finger CCCH type containing 11A                              | NE, NP | Yes |
| 125656178 | Zfhx4   | zinc finger homeodomain 4                                         | NP     | No  |
| 13195658  | Zfp1    | zinc finger like protein 1                                        | NE, NP | Yes |
| 27777687  | Zfp13   | zinc finger protein 13                                            | NP     | No  |
| 121247390 | Zfp143  | zinc finger protein 143                                           | NE     | Yes |
| 6756049   | Zfp148  | zinc finger protein 148                                           | NE     | Yes |
| 47059078  | Zfp191  | zinc finger protein 191                                           | NP     | Yes |
| 225007600 | Zfp212  | Zinc finger protein 212 isoform 1                                 | NE     | Yes |
| 225543502 | Zfp219  | zinc finger protein 219                                           | NE, NP | Yes |
| 158749569 | Zfp280b | zinc finger protein 280b                                          | NE     | No  |
| 56118256  | Zfp324  | zinc finger protein 324                                           | NE     | No  |
| 6754396   | Zfp346  | zinc finger protein 346                                           | NE     | Yes |
| 238859639 | Zfp352  | zinc finger protein 352                                           | NP     | No  |
| 113865966 | Zfp397  | zinc finger protein 397                                           | NP     | Yes |
| 124339857 | Zfp418  | zinc finger protein 418                                           | NE     | No  |
| 28076891  | Zfp422  | zinc finger protein 422                                           | NP     | Yes |
| 46359077  | Zfp423  | zinc finger protein 423                                           | NE     | No  |
| 257467538 | Zfp438  | zinc finger protein 438                                           | NP     | No  |
| 29789329  | Zfp451  | zinc finger protein 451                                           | NP     | Yes |
| 123702020 | Zfp456  | zinc finger protein 456                                           | NE     | No  |

|           |          |                                                     |        |     |
|-----------|----------|-----------------------------------------------------|--------|-----|
| 114431238 | Zfp462   | zinc finger protein 462                             | NE     | No  |
| 254553392 | Zfp512   | zinc finger protein 512                             | NE, NP | Yes |
| 294489298 | Zfp516   | zinc finger protein 516                             | NE, NP | No  |
| 46402263  | Zfp532   | zinc finger protein 532                             | NE     | No  |
| 160333308 | Zfp619   | zinc finger protein 619                             | NP     | No  |
| 28893273  | Zfp629   | zinc finger protein 629                             | NE     | Yes |
| 30424631  | Zfp641   | zinc finger protein 641                             | NP     | No  |
| 46358380  | Zfp646   | zinc finger protein 646                             | NE     | No  |
| 27229259  | Zfp687   | zinc finger protein 687                             | NE     | Yes |
| 225543087 | Zfp691   | zinc finger protein 691                             | NE     | No  |
| 100817090 | Zfp692   | zinc finger protein 692                             | NP     | Yes |
| 18875370  | Zfp704   | zinc finger protein 704                             | NE, NP | No  |
| 123173818 | Zfp715   | zinc finger protein 715                             | NP     | Yes |
| 119226195 | Zfp759   | zinc finger protein 759                             | NE, NP | No  |
| 29789173  | Zfp788   | zinc finger protein 788                             | NE     | No  |
| 22165394  | Zfp87    | zinc finger protein 87                              | NP     | No  |
| 140969612 | Zfp871   | zinc finger protein 871                             | NE     | Yes |
| 21704232  | Zfp810   | zinc finger protein ZFP                             | NP     | Yes |
| 122114637 | lkzf4    | zinc finger protein, subfamily 1A, 4                | NP     | No  |
| 194473741 | Zkscan17 | zinc finger with KRAB and SCAN domains 17 isoform 1 | NE     | Yes |
| 224809352 | Zkscan3  | zinc finger with KRAB and SCAN domains 3            | NE     | Yes |
| 58037197  | Znhit1   | zinc finger, HIT domain containing 1                | NE     | Yes |
| 13385046  | Zmat2    | zinc finger, matrin type 2                          | NP     | Yes |
| 28893005  | Zmat4    | zinc finger, matrin type 4                          | NE     | No  |
| 91064878  | Zmynd8   | zinc finger, MYND-type containing 8                 | NE, NP | Yes |
| 74315981  | Zranb2   | zinc finger, RAN-binding domain containing 2        | NE     | Yes |
| 40254321  | Zhx3     | zinc fingers and homeoboxes 3                       | NE     | Yes |
| 40254321  | Zhx3     | zinc fingers and homeoboxes 3                       | NE     | Yes |
| 40789094  | Zhx2     | zinc fingers and homeoboxes protein 2               | NE     | Yes |
| 40789094  | Zhx2     | zinc fingers and homeoboxes protein 2               | NE     | Yes |

Suppl. Tab. 4

| GI Accession No. | Gene Symbol | Protein Name                                                     | Location | Transcriptome match |
|------------------|-------------|------------------------------------------------------------------|----------|---------------------|
| 160358785        | Acvr2a      | activin A receptor, type IIA precursor                           | NP       | Yes                 |
| 190883484        | Akt3        | AKT3 kinase                                                      | NE       | Yes                 |
| 163838660        | Atm         | ataxia telangiectasia mutated                                    | NE       | Yes                 |
| 18129622         | Bmp2k       | BMP2 inducible kinase                                            | NP       | Yes                 |
| 6680802          | Bmpr1b      | bone morphogenetic protein receptor, type IB                     | NP       | No                  |
| 6753164          | Bckdk       | branched chain ketoacid dehydrogenase kinase                     | NE       | Yes                 |
| 162951870        | Abl1        | c-abl oncogene 1, receptor tyrosine kinase isoform b             | NE       | Yes                 |
| 85362742         | Camk2g      | calcium/calmodulin-dependent protein kinase II gamma isoform 2   | NE       | Yes                 |
| 70906479         | Camk2d      | calcium/calmodulin-dependent protein kinase II, delta isoform 3  | NE       | Yes                 |
| 21703722         | Camkk2      | calcium/calmodulin-dependent protein kinase kinase 2, beta       | NE, NP   | Yes                 |
| 133504495        | Cask        | calcium/calmodulin-dependent serine protein kinase               | NP       | Yes                 |
| 31542425         | Csnk1e      | casein kinase 1 epsilon                                          | NE       | Yes                 |
| 22165382         | Csnk1a1     | casein kinase 1, alpha 1                                         | NE, NP   | Yes                 |
| 20544149         | Csnk1d      | casein kinase 1, delta isoform 2                                 | NE, NP   | Yes                 |
| 113462019        | Csnk1g3     | casein kinase 1, gamma 3                                         | NE       | Yes                 |
| 31542427         | Csnk2a1     | casein kinase 2, alpha 1 polypeptide                             | NE       | Yes                 |
| 6753540          | Csnk2a2     | casein kinase 2, alpha prime polypeptide                         | NE       | Yes                 |
| 283135190        | Cdc42bpb    | CDC42 binding protein kinase beta                                | NE, NP   | Yes                 |
| 111038135        | Clk1        | CDC-like kinase 1 isoform 2                                      | NP       | Yes                 |
| 254540152        | Clk2        | CDC-like kinase 2 isoform 1                                      | NP       | Yes                 |
| 83745112         | Clk3        | CDC-like kinase 3                                                | NE       | Yes                 |
| 31542366         | Cdc2a       | cell division cycle 2                                            | NE       | Yes                 |
| 126723423        | Csf1r       | colony stimulating factor 1 receptor                             | NE       | Yes                 |
| 6753380          | Cdk4        | cyclin-dependent kinase 4                                        | NE       | Yes                 |
| 6680908          | Cdk5        | cyclin-dependent kinase 5                                        | NP       | Yes                 |
| 160333726        | Cdk7        | cyclin-dependent kinase 7                                        | NE       | Yes                 |
| 31652272         | Cdk8        | cyclin-dependent kinase 8                                        | NE       | Yes                 |
| 18699998         | Cdk9        | cyclin-dependent kinase 9                                        | NP       | Yes                 |
| 238776837        | Dclk3       | doublecortin-like kinase 3                                       | NP       | No                  |
| 67846105         | Dyrk2       | dual-specificity tyrosine-(Y)-phosphorylation regulated kinase 2 | NP       | Yes                 |
| 111185951        | Tek         | endothelial-specific receptor tyrosine kinase                    | NP       | No                  |
| 47777351         | Ephb2       | Eph receptor B2                                                  | NP       | Yes                 |
| 226437671        | Ephb6       | Eph receptor B6                                                  | NP       | No                  |
| 6681275          | Eef2k       | eukaryotic elongation factor-2 kinase                            | NP       | Yes                 |
| 166851838        | Eif2ak4     | eukaryotic translation initiation factor 2 alpha kinase 4        | NP       | No                  |
| 6755160          | Eif2ak2     | eukaryotic translation initiation factor 2-alpha kinase 2        | NE       | Yes                 |
| 85861160         | Fastk       | Fas-activated serine/threonine kinase                            | NP       | No                  |
| 122937353        | Flt3        | FMS-like tyrosine kinase 3                                       | NP       | No                  |
| 6679813          | Flt4        | fms-related tyrosine kinase 4                                    | NE       | No                  |
| 9790077          | Gsk3b       | glycogen synthase kinase 3 beta                                  | NE       | Yes                 |
| 161333817        | Hipk4       | homeodomain interacting protein kinase 4                         | NP       | No                  |
| 309269577        | EG626858    | hypothetical protein /Sperm motility kinase W                    | NP       | No                  |
| 309263699        | Gm318       | hypothetical protein /Sperm motility kinase W                    | NE       | No                  |
| 240255653        | Ilk         | integrin-linked kinase                                           | NE       | Yes                 |
| 255522773        | Ick         | intestinal cell kinase                                           | NP       | No                  |
| 114326480        | Jak2        | Janus kinase 2                                                   | NP       | Yes                 |
| 27777648         | Kdr         | kinase insert domain protein receptor                            | NE       | No                  |
| 77404365         | Limk2       | LIM motif-containing protein kinase 2 isoform b                  | NE       | Yes                 |
| 122937363        | Mark2       | MAP/microtubule affinity-regulating kinase 2 isoform 1           | NE, NP   | Yes                 |
| 251823812        | Mark3       | MAP/microtubule affinity-regulating kinase 3 isoform 2           | NE       | Yes                 |
| 21489933         | Mapk3       | mitogen activated protein kinase 3                               | NP       | Yes                 |

|           |          |                                                                             |        |     |
|-----------|----------|-----------------------------------------------------------------------------|--------|-----|
| 89257354  | Map3k2   | mitogen activated protein kinase kinase kinase 2                            | NE     | Yes |
| 84579909  | Mapk1    | mitogen-activated protein kinase 1                                          | NE     | Yes |
| 226246627 | Mapk13   | mitogen-activated protein kinase 13                                         | NE     | Yes |
| 6754624   | Map2k5   | mitogen-activated protein kinase kinase 5                                   | NP     | Yes |
| 171846249 | Map3k5   | mitogen-activated protein kinase kinase kinase 5                            | NE     | Yes |
| 77736537  | Map4k5   | mitogen-activated protein kinase kinase kinase kinase 5                     | NE     | Yes |
| 126157499 | Mylk     | myosin, light polypeptide kinase                                            | NE, NP | Yes |
| 225543267 | Nrk      | Nik related kinase                                                          | NE, NP | No  |
| 304766813 | Nek10    | NIMA-related kinase 10                                                      | NE     | No  |
| 31559852  | Nek5     | NIMA-related kinase 5                                                       | NE, NP | No  |
| 29336032  | Pak4     | p21-activated kinase 4                                                      | NE     | Yes |
| 224994209 | Pak6     | p21-activated kinase 6                                                      | NP     | Yes |
| 6679233   | Pctk3    | PCTAIRE protein kinase 3                                                    | NE, NP | Yes |
| 7242173   | Pctk1    | PCTAIRE-motif protein kinase 1                                              | NP     | Yes |
| 65508357  | Plk5     | polo-like kinase 5                                                          | NE     | No  |
| 6755082   | Prkcd    | protein kinase C, delta                                                     | NP     | Yes |
| 6755080   | Prkcc    | protein kinase C, gamma                                                     | NP     | No  |
| 133778989 | Prkci    | protein kinase C, iota                                                      | NE     | Yes |
| 6679353   | Prkcq    | protein kinase C, theta                                                     | NE     | No  |
| 284005389 | Prkd3    | protein kinase D3                                                           | NE     | No  |
| 94681061  | Prkaa1   | protein kinase, AMP-activated, alpha 1 catalytic subunit                    | NP     | Yes |
| 7110693   | Prkaca   | protein kinase, cAMP dependent, catalytic, alpha                            | NE     | Yes |
| 124517706 | Prkdc    | protein kinase, DNA-activated, catalytic polypeptide                        | NE, NP | Yes |
| 110625699 | Pkmyt1   | protein kinase, membrane associated tyrosine/threonine 1                    | NP     | Yes |
| 171543841 | Fyn      | protein-tyrosine kinase fyn isoform b                                       | NE, NP | No  |
| 158854005 | Prpf4b   | PRP4 pre-mRNA processing factor 4 homolog B                                 | NE, NP | Yes |
| 126215545 | Pink1    | PTEN induced putative kinase 1                                              | NE     | No  |
| 6677971   | Ptk6     | PTK6 protein tyrosine kinase 6                                              | NP     | No  |
| 72535128  | Pxk      | PX domain containing serine/threonine kinase short isoform                  | NE     | Yes |
| 110625975 | Pdk1     | pyruvate dehydrogenase kinase 1                                             | NE     | Yes |
| 21704122  | Pdk3     | pyruvate dehydrogenase kinase 3                                             | NE     | Yes |
| 7305375   | Pdk4     | pyruvate dehydrogenase kinase, isoenzyme 4                                  | NE     | No  |
| 124256487 | Ret      | ret proto-oncogene isoform a                                                | NP     | No  |
| 134949013 | Rock2    | Rho-associated coiled-coil forming kinase 2                                 | NE     | Yes |
| 6677759   | Rock1    | Rho-associated, coiled-coil containing protein kinase 1                     | NP     | Yes |
| 9910454   | Rps6ka4  | ribosomal protein S6 kinase, polypeptide 4                                  | NP     | Yes |
| 70794811  | Src      | Rous sarcoma oncogene isoform 1                                             | NE, NP | Yes |
| 31982726  | Srpk1    | serine/arginine-rich protein specific kinase 1                              | NE     | Yes |
| 9790111   | Srpk3    | serine/arginine-rich protein specific kinase 3                              | NP     | No  |
| 226958539 | Stk16    | serine/threonine kinase 16                                                  | NP     | Yes |
| 89337277  | Stk25    | serine/threonine kinase 25                                                  | NE     | Yes |
| 27370078  | Stk38l   | serine/threonine kinase 38 like                                             | NP     | Yes |
| 160333312 | Qsk      | serine/threonine-protein kinase QSK                                         | NP     | Yes |
| 257796265 | Sgk1     | serum/glucocorticoid regulated kinase 1 isoform e                           | NE     | No  |
| 254675181 | Alpk2    | similar to heart alpha-kinase isoform 1                                     | NE     | No  |
| 254692972 | Cdc42bpa | similar to mytonic dystrophy kinase-related Cdc42-binding kinase isoform 12 | NP     | Yes |
| 257196125 | Snrk     | SNF related kinase                                                          | NE     | Yes |
| 291042652 | Speg     | SPEG complex locus isoform 1                                                | NE, NP | No  |
| 225543141 | Tesk2    | testis-specific kinase 2                                                    | NE     | No  |
| 71067122  | Vrk1     | vaccinia related kinase 1 isoform a                                         | NE     | Yes |
| 19527166  | Vrk3     | vaccinia related kinase 3                                                   | NE, NP | Yes |
| 227496776 | Araf     | v-raf murine sarcoma 3611 viral oncogene homolog isoform 1                  | NE, NP | Yes |
| 171846235 | Wee2     | WEE1 homolog 2                                                              | NE     | No  |

Suppl. Tab. 5

| GI Accession No. | Gene Symbol   | Protein Name                                                      | Location | Transcriptome match |
|------------------|---------------|-------------------------------------------------------------------|----------|---------------------|
| 29150253         | Acp2          | acid phosphatase 2, lysosomal                                     | NE       | Yes                 |
| 13384810         | Acyp1         | acylphosphatase 1                                                 | NE       | Yes                 |
| 110347479        | Akp3          | alkaline phosphatase 3, intestine, not Mn requiring               | NE       | No                  |
| 8394027          | Ppp2r1a       | alpha isoform of regulatory subunit A, protein phosphatase 2      | NE, NP   | Yes                 |
| 12025542         | Asna1         | arsA arsenite transporter, ATP-binding, homolog 1                 | NP       | Yes                 |
| 9790225          | 1500003O03Rik | calcium binding protein P22                                       | NE, NP   | Yes                 |
| 92373436         | Cdc25a        | cell division cycle 25A                                           | NP       | Yes                 |
| 161621261        | Cdc25b        | cell division cycle 25B isoform a                                 | NP       | Yes                 |
| 227497222        | Dut           | deoxyuridine triphosphatase isoform 2                             | NE       | Yes                 |
| 255683318        | Entpd3        | ectonucleoside triphosphate diphosphohydrolase 3                  | NE       | No                  |
| 309262519        | LOC631217     | hypothetical protein                                              | NE       | No                  |
| 39930415         | Ilkap         | integrin-linked kinase-associated serine/threonine phosphatase 2C | NE       | Yes                 |
| 224994246        | Mttr11        | myotubularin related protein 11                                   | NP       | Yes                 |
| 33563378         | Mttr9         | myotubularin related protein 9                                    | NP       | Yes                 |
| 13384950         | Nudt8         | nudix-type motif 8                                                | NE       | Yes                 |
| 110431341        | Ppap2c        | phosphatidic acid phosphatase type 2c                             | NP       | Yes                 |
| 118601009        | Pnkp          | polynucleotide kinase &apos; phosphatase                          | NE       | Yes                 |
| 13994195         | Ppp1ca        | protein phosphatase 1, catalytic subunit, alpha                   | NE, NP   | Yes                 |
| 161484668        | Ppp1cb        | protein phosphatase 1, catalytic subunit, beta isoform            | NE, NP   | Yes                 |
| 31980772         | Ppp1cc        | protein phosphatase 1, catalytic subunit, gamma isoform           | NE       | Yes                 |
| 6679443          | Ppm1a         | protein phosphatase 1A, magnesium dependent, alpha isoform        | NP       | Yes                 |
| 9506983          | Ppp2ca        | protein phosphatase 2a, catalytic subunit, alpha isoform          | NE, NP   | Yes                 |
| 45592930         | Ppp3cb        | protein phosphatase 3, catalytic subunit, beta                    | NP       | Yes                 |
| 9790175          | Ppp4c         | protein phosphatase 4, catalytic subunit                          | NP       | Yes                 |
| 21312758         | Ppp6c         | protein phosphatase 6, catalytic subunit                          | NP       | Yes                 |
| 6755226          | Ptp4a1        | protein tyrosine phosphatase 4a1                                  | NE       | Yes                 |
| 258613926        | Ptp4a2        | protein tyrosine phosphatase 4a2                                  | NE       | Yes                 |
| 23956130         | Ptpmt1        | protein tyrosine phosphatase, mitochondrial 1                     | NE, NP   | Yes                 |
| 134948762        | Ptpn13        | protein tyrosine phosphatase, non-receptor type 13                | NP       | Yes                 |
| 110825986        | Ptpn14        | protein tyrosine phosphatase, non-receptor type 14                | NE, NP   | Yes                 |
| 118130785        | Ptpn6         | protein tyrosine phosphatase, non-receptor type 6 isoform b       | NE       | Yes                 |
| 149249895        | LOC668629     | similar to PTPRJ                                                  | NE       | No                  |

**Suppl. Tab. 6**

List of all proteins identified in our SILAC study. \* depicts p<.05; # depicts changes greater than 2\*SD/3<sup>0.5</sup> from 0

| GI<br>Accession<br>No. | Gene Symbol  | Protein Name                                                                        | Nuclear extract |     |     |       | average<br>log2(treated/<br>control) | Nuclear pellet |     |       |      | average<br>log2(treated/<br>control) |
|------------------------|--------------|-------------------------------------------------------------------------------------|-----------------|-----|-----|-------|--------------------------------------|----------------|-----|-------|------|--------------------------------------|
|                        |              |                                                                                     | peptide count   |     |     |       |                                      | peptide count  |     |       |      |                                      |
|                        |              |                                                                                     | 1               | 2   | 3   | total | 1                                    | 2              | 3   | total |      |                                      |
| 6753164                | Bckdk        | [3-methyl-2-oxobutanoate dehydrogenase [lipoamide]] kinase, mitochondrial precursor | 4               | 11  | 1   | 16    | -0.05                                | 0              | 0   | 1     | 1    | 0.15                                 |
| 6680309                | Hspe1        | 10 kDa heat shock protein, mitochondrial                                            | 7               | 3   | 5   | 15    | -0.16                                | 2              | 1   | 0     | 3    | -0.06                                |
| 6755594                | Eftud2       | 116 kDa U5 small nuclear ribonucleoprotein component isoform a                      | 91              | 113 | 127 | 331   | 0.00                                 | 310            | 414 | 430   | 1154 | 0.00                                 |
| 58037409               | Phpt1        | 14 kDa phosphohistidine phosphatase                                                 | 0               | 0   | 0   | 0     |                                      | 0              | 0   | 2     | 2    | -0.17                                |
| 31543974               | Ywhab        | 14-3-3 protein beta/alpha                                                           | 16              | 14  | 19  | 49    | -0.03                                | 33             | 35  | 57    | 125  | -0.12                                |
| 226874906              | Ywhae        | 14-3-3 protein epsilon                                                              | 23              | 27  | 23  | 73    | -0.08                                | 66             | 44  | 79    | 189  | -0.07                                |
| 6756037                | Ywhah        | 14-3-3 protein eta                                                                  | 16              | 15  | 15  | 46    | -0.04                                | 12             | 27  | 38    | 77   | -0.09                                |
| 31543976               | Ywhag        | 14-3-3 protein gamma                                                                | 13              | 13  | 18  | 44    | 0.00                                 | 19             | 28  | 48    | 95   | -0.15                                |
| 134023662              | Sfn          | 14-3-3 protein sigma                                                                | 0               | 0   | 0   | 0     |                                      | 0              | 0   | 15    | 15   | 0.16                                 |
| 309262630              | LOC100503129 | 14-3-3 protein theta-like                                                           | 17              | 14  | 23  | 54    | -0.10                                | 24             | 30  | 83    | 137  | -0.07                                |
| 309263398              | Gm2423       | 14-3-3 protein theta-like                                                           | 6               | 4   | 20  | 30    | -0.12                                | 20             | 14  | 52    | 86   | -0.24                                |
| 6756041                | Ywhaz        | 14-3-3 protein zeta/delta                                                           | 24              | 23  | 30  | 77    | -0.05                                | 142            | 77  | 170   | 389  | -0.05                                |
| 16716395               | Sep15        | 15 kDa selenoprotein precursor                                                      | 11              | 2   | 4   | 17    | -0.30 *                              | 1              | 0   | 2     | 3    | 0.10                                 |
| 124486923              | Tnks1bp1     | 182 kDa tankyrase-1-binding protein                                                 | 1               | 6   | 1   | 8     | -0.59 #                              | 0              | 0   | 0     | 0    |                                      |
| 254281341              | Agpat1       | 1-acyl-sn-glycerol-3-phosphate acyltransferase alpha isoform 1                      | 1               | 1   | 0   | 2     | -0.31                                | 0              | 0   | 0     | 0    |                                      |
| 23956162               | Agpat2       | 1-acyl-sn-glycerol-3-phosphate acyltransferase beta                                 | 10              | 1   | 4   | 15    | -0.43                                | 0              | 0   | 0     | 0    |                                      |
| 27229064               | Agpat4       | 1-acyl-sn-glycerol-3-phosphate acyltransferase delta                                | 1               | 0   | 0   | 1     | 0.03                                 | 0              | 0   | 0     | 0    |                                      |
| 27229278               | Agpat3       | 1-acyl-sn-glycerol-3-phosphate acyltransferase gamma                                | 1               | 0   | 2   | 3     | -0.57                                | 1              | 1   | 2     | 4    | -0.36                                |
| 31982122               | Plcb3        | 1-phosphatidylinositol-4,5-bisphosphate phosphodiesterase beta-3                    | 42              | 59  | 53  | 154   | -0.02                                | 0              | 8   | 6     | 14   | 0.07                                 |
| 26986603               | Plcg2        | 1-phosphatidylinositol-4,5-bisphosphate phosphodiesterase gamma-2                   | 0               | 0   | 0   | 0     |                                      | 0              | 0   | 1     | 1    | -4.02 #                              |
| 226423909              | Cnp          | 2',3'-cyclic-nucleotide 3'-phosphodiesterase isoform 1                              | 0               | 1   | 5   | 6     | 1.37 #                               | 0              | 3   | 9     | 12   | -0.10                                |
| 9256529                | Cyp39a1      | 24-hydroxycholesterol 7-alpha-hydroxylase                                           | 1               | 0   | 0   | 1     | 0.27                                 | 0              | 0   | 0     | 0    |                                      |
| 281332108              | Oas1a        | 2'-5'-oligoadenylate synthase 1A                                                    | 0               | 0   | 0   | 0     |                                      | 0              | 1   | 1     | 2    | -0.22                                |
| 27754103               | Psmc6        | 26S protease regulatory subunit 10B                                                 | 0               | 1   | 1   | 2     | -1.36 #                              | 0              | 0   | 1     | 1    | -0.55 #                              |
| 6679501                | Psmc1        | 26S protease regulatory subunit 4                                                   | 0               | 0   | 1   | 1     | 0.64 #                               | 0              | 0   | 0     | 0    |                                      |
| 228008337              | Psmc3        | 26S protease regulatory subunit 6A                                                  | 0               | 1   | 0   | 1     | 0.70 #                               | 0              | 0   | 3     | 3    | 0.03                                 |
| 124248577              | Psmc4        | 26S protease regulatory subunit 6B                                                  | 0               | 0   | 0   | 0     |                                      | 0              | 0   | 1     | 1    | -0.36                                |
| 33859604               | Psmc2        | 26S protease regulatory subunit 7                                                   | 0               | 0   | 0   | 0     |                                      | 0              | 1   | 4     | 5    | 0.03                                 |
| 7110703                | Psmc5        | 26S protease regulatory subunit 8                                                   | 0               | 1   | 1   | 2     | 0.22                                 | 1              | 2   | 16    | 19   | 0.06                                 |
| 74315975               | Psmd1        | 26S proteasome non-ATPase regulatory subunit 1                                      | 0               | 0   | 0   | 0     |                                      | 0              | 0   | 2     | 2    | 0.03                                 |
| 134053905              | Psmd11       | 26S proteasome non-ATPase regulatory subunit 11                                     | 1               | 0   | 2   | 3     | 0.03                                 | 0              | 0   | 7     | 7    | -0.09                                |
| 13385384               | Psmd12       | 26S proteasome non-ATPase regulatory subunit 12                                     | 0               | 0   | 1   | 1     | 0.05                                 | 0              | 2   | 5     | 7    | -0.34                                |
| 6755210                | Psmd13       | 26S proteasome non-ATPase regulatory subunit 13                                     | 0               | 0   | 0   | 0     |                                      | 0              | 0   | 1     | 1    | 0.13                                 |
| 145966883              | Psmd14       | 26S proteasome non-ATPase regulatory subunit 14                                     | 0               | 0   | 0   | 0     |                                      | 0              | 0   | 1     | 1    | 0.01                                 |
| 19882201               | Psmd2        | 26S proteasome non-ATPase regulatory subunit 2                                      | 0               | 0   | 0   | 0     |                                      | 0              | 0   | 5     | 5    | -0.16                                |

|           |         |                                                                   |    |    |    |    |         |   |   |    |    |         |
|-----------|---------|-------------------------------------------------------------------|----|----|----|----|---------|---|---|----|----|---------|
| 19705424  | Psmd3   | 26S proteasome non-ATPase regulatory subunit 3                    | 2  | 0  | 0  | 2  | 0.11    | 0 | 1 | 2  | 3  | -0.31   |
| 134053913 | Psmd5   | 26S proteasome non-ATPase regulatory subunit 5                    | 0  | 0  | 0  | 0  |         | 0 | 0 | 14 | 14 | -0.03   |
| 46049022  | Psmd6   | 26S proteasome non-ATPase regulatory subunit 6                    | 0  | 0  | 1  | 1  | 0.21    | 0 | 4 | 4  | 8  | -0.23   |
| 6754724   | Psmd7   | 26S proteasome non-ATPase regulatory subunit 7                    | 1  | 0  | 0  | 1  | 0.47    | 0 | 1 | 3  | 4  | -0.50 # |
| 156713423 | Psmd8   | 26S proteasome non-ATPase regulatory subunit 8                    | 1  | 0  | 0  | 1  | -0.14   | 0 | 0 | 0  | 0  |         |
| 84781781  | Pdap1   | 28 kDa heat- and acid-stable phosphoprotein                       | 27 | 27 | 20 | 74 | -0.02   | 0 | 7 | 8  | 15 | 0.20    |
| 226246598 | Mrps10  | 28S ribosomal protein S10, mitochondrial isoform 3                | 7  | 2  | 3  | 12 | -0.06   | 0 | 0 | 0  | 0  |         |
| 170650663 | Mrps11  | 28S ribosomal protein S11, mitochondrial precursor                | 0  | 3  | 1  | 4  | -0.15   | 0 | 0 | 0  | 0  |         |
| 13384894  | Mrps14  | 28S ribosomal protein S14, mitochondrial                          | 3  | 0  | 2  | 5  | -0.22 * | 0 | 0 | 0  | 0  |         |
| 48526512  | Mrps15  | 28S ribosomal protein S15, mitochondrial precursor                | 0  | 1  | 0  | 1  | -0.03   | 0 | 0 | 0  | 0  |         |
| 13384854  | Mrps17  | 28S ribosomal protein S17, mitochondrial precursor                | 2  | 2  | 1  | 5  | -0.13   | 0 | 0 | 0  | 0  |         |
| 17505206  | Mrps18a | 28S ribosomal protein S18a, mitochondrial precursor               | 0  | 1  | 0  | 1  | -0.16   | 0 | 0 | 0  | 0  |         |
| 58037129  | Mrps18c | 28S ribosomal protein S18c, mitochondrial precursor               | 1  | 0  | 0  | 1  | -1.73 # | 0 | 0 | 0  | 0  |         |
| 260593696 | Mrps2   | 28S ribosomal protein S2, mitochondrial isoform 1                 | 4  | 2  | 4  | 10 | -0.10   | 0 | 0 | 0  | 0  |         |
| 17505220  | Mrps21  | 28S ribosomal protein S21, mitochondrial                          | 5  | 1  | 2  | 8  | -0.15   | 1 | 1 | 0  | 2  | -0.08   |
| 13384904  | Mrps22  | 28S ribosomal protein S22, mitochondrial                          | 3  | 2  | 2  | 7  | -0.30 * | 0 | 0 | 2  | 2  | -0.04   |
| 27228982  | Mrps23  | 28S ribosomal protein S23, mitochondrial                          | 5  | 2  | 2  | 9  | 0.18    | 0 | 1 | 1  | 2  | -0.38   |
| 13385578  | Mrps24  | 28S ribosomal protein S24, mitochondrial precursor                | 2  | 0  | 0  | 2  | -0.30   | 0 | 0 | 0  | 0  |         |
| 31981257  | Mrps25  | 28S ribosomal protein S25, mitochondrial                          | 5  | 3  | 2  | 10 | -0.23 * | 0 | 2 | 1  | 3  | -0.32   |
| 46402169  | Mrps26  | 28S ribosomal protein S26, mitochondrial precursor                | 4  | 4  | 3  | 11 | -0.06   | 0 | 1 | 4  | 5  | -0.07   |
| 50980303  | Mrps27  | 28S ribosomal protein S27, mitochondrial                          | 4  | 1  | 1  | 6  | -0.19   | 0 | 1 | 0  | 1  | -0.85 # |
| 254587936 | Mrps28  | 28S ribosomal protein S28, mitochondrial                          | 3  | 3  | 0  | 6  | -0.06   | 0 | 0 | 0  | 0  |         |
| 256985205 | Dap3    | 28S ribosomal protein S29, mitochondrial isoform 1                | 2  | 0  | 0  | 2  | 0.00    | 0 | 1 | 2  | 3  | -0.24   |
| 256985203 | Dap3    | 28S ribosomal protein S29, mitochondrial isoform 2                | 0  | 5  | 5  | 10 | -0.11   | 0 | 0 | 0  | 0  |         |
| 29789128  | Mrps30  | 28S ribosomal protein S30, mitochondrial                          | 2  | 2  | 6  | 10 | -0.37   | 0 | 1 | 0  | 1  | -0.37   |
| 10181116  | Mrps31  | 28S ribosomal protein S31, mitochondrial precursor                | 3  | 1  | 0  | 4  | 0.11    | 0 | 0 | 0  | 0  |         |
| 33859564  | Mrps33  | 28S ribosomal protein S33, mitochondrial isoform 1                | 3  | 1  | 1  | 5  | 1.19 #  | 0 | 0 | 0  | 0  |         |
| 13385670  | Mrps34  | 28S ribosomal protein S34, mitochondrial                          | 4  | 3  | 4  | 11 | -0.11   | 0 | 0 | 0  | 0  |         |
| 148235701 | Mrps35  | 28S ribosomal protein S35, mitochondrial precursor                | 3  | 2  | 2  | 7  | -0.08   | 0 | 0 | 0  | 0  |         |
| 17157985  | Mrps5   | 28S ribosomal protein S5, mitochondrial                           | 0  | 0  | 0  | 0  |         | 0 | 0 | 1  | 1  | 0.23    |
| 23956244  | Mrps6   | 28S ribosomal protein S6, mitochondrial                           | 1  | 2  | 2  | 5  | -0.02   | 0 | 0 | 0  | 0  |         |
| 30794474  | Mrps7   | 28S ribosomal protein S7, mitochondrial precursor                 | 6  | 5  | 5  | 16 | -0.15   | 0 | 3 | 3  | 6  | 0.02    |
| 169790909 | Mrps9   | 28S ribosomal protein S9, mitochondrial precursor                 | 5  | 2  | 4  | 11 | -0.20   | 0 | 4 | 4  | 8  | -0.16   |
| 240120117 | Gcat    | 2-amino-3-ketobutyrate coenzyme A ligase, mitochondrial isoform a | 4  | 0  | 0  | 4  | -0.31   | 0 | 0 | 0  | 0  |         |
| 240120119 | Gcat    | 2-amino-3-ketobutyrate coenzyme A ligase, mitochondrial isoform b | 0  | 0  | 1  | 1  | -0.24   | 0 | 0 | 0  | 0  |         |

|           |        |                                                                 |    |    |    |    |         |  |   |   |   |    |         |
|-----------|--------|-----------------------------------------------------------------|----|----|----|----|---------|--|---|---|---|----|---------|
| 31543926  | Ugt8a  | 2-hydroxyacylsphingosine 1-beta-galactosyltransferase precursor | 1  | 1  | 0  | 2  | -0.13   |  | 0 | 0 | 0 | 0  |         |
| 85861164  | Ogdh   | 2-oxoglutarate dehydrogenase, mitochondrial precursor           | 8  | 2  | 4  | 14 | -0.32   |  | 9 | 1 | 5 | 15 | -0.19   |
| 183396774 | Bckdha | 2-oxoisovalerate dehydrogenase subunit alpha, mitochondrial     | 0  | 0  | 2  | 2  | 0.06    |  | 0 | 0 | 0 | 0  |         |
| 40353220  | Bckdhb | 2-oxoisovalerate dehydrogenase subunit beta, mitochondrial      | 0  | 1  | 0  | 1  | 0.28    |  | 0 | 0 | 0 | 0  |         |
| 31981810  | Eci1   | 3,2-trans-enoyl-CoA isomerase, mitochondrial precursor          | 29 | 15 | 17 | 61 | -0.28 * |  | 0 | 3 | 3 | 6  | -0.03   |
| 22267446  | Exosc1 | 3'-5' exoribonuclease CSL4 homolog isoform 1                    | 11 | 17 | 10 | 38 | -0.01   |  | 0 | 0 | 6 | 6  | 0.10    |
| 257096005 | Exosc1 | 3'-5' exoribonuclease CSL4 homolog isoform 2                    | 0  | 0  | 0  | 0  |         |  | 0 | 3 | 0 | 3  | -0.08   |
| 84875528  | Mrpl1  | 39S ribosomal protein L1, mitochondrial isoform 1               | 0  | 6  | 6  | 12 | -0.15   |  | 0 | 0 | 0 | 0  |         |
| 84875532  | Mrpl1  | 39S ribosomal protein L1, mitochondrial isoform 2               | 0  | 0  | 0  | 0  |         |  | 0 | 0 | 1 | 1  | 0.00    |
| 13385658  | Mrpl10 | 39S ribosomal protein L10, mitochondrial precursor              | 12 | 11 | 10 | 33 | -0.24   |  | 0 | 2 | 0 | 2  | -0.33   |
| 13384980  | Mrpl11 | 39S ribosomal protein L11, mitochondrial precursor              | 7  | 7  | 7  | 21 | -0.16 * |  | 0 | 0 | 1 | 1  | -0.52 # |
| 22164792  | Mrpl12 | 39S ribosomal protein L12, mitochondrial precursor              | 13 | 18 | 11 | 42 | -0.16   |  | 0 | 3 | 4 | 7  | -0.05   |
| 21312936  | Mrpl13 | 39S ribosomal protein L13, mitochondrial                        | 3  | 4  | 1  | 8  | -0.08   |  | 0 | 2 | 0 | 2  | -0.18   |
| 21312028  | Mrpl14 | 39S ribosomal protein L14, mitochondrial precursor              | 7  | 1  | 3  | 11 | -0.08   |  | 1 | 0 | 0 | 1  | 0.06    |
| 295054166 | Mrpl15 | 39S ribosomal protein L15, mitochondrial isoform 1 precursor    | 0  | 0  | 0  | 0  |         |  | 0 | 0 | 2 | 2  | -0.50 # |
| 33468983  | Mrpl15 | 39S ribosomal protein L15, mitochondrial isoform 2 precursor    | 2  | 2  | 4  | 8  | -0.91 # |  | 0 | 0 | 0 | 0  |         |
| 19424352  | Mrpl16 | 39S ribosomal protein L16, mitochondrial precursor              | 0  | 0  | 0  | 0  |         |  | 0 | 3 | 0 | 3  | -0.16   |
| 13384658  | Mrpl17 | 39S ribosomal protein L17, mitochondrial precursor              | 1  | 1  | 0  | 2  | -0.08   |  | 0 | 0 | 0 | 0  |         |
| 13385808  | Mrpl18 | 39S ribosomal protein L18, mitochondrial precursor              | 3  | 7  | 4  | 14 | -0.07   |  | 0 | 0 | 1 | 1  | 1.08 #  |
| 13385976  | Mrpl19 | 39S ribosomal protein L19, mitochondrial precursor              | 2  | 4  | 1  | 7  | -0.22   |  | 0 | 0 | 1 | 1  | 0.08    |
| 13384660  | Mrpl2  | 39S ribosomal protein L2, mitochondrial precursor               | 1  | 2  | 2  | 5  | -0.11   |  | 0 | 1 | 1 | 2  | -0.21   |
| 20270194  | Mrpl20 | 39S ribosomal protein L20, mitochondrial precursor              | 3  | 3  | 4  | 10 | 0.03    |  | 0 | 0 | 0 | 0  |         |
| 31982032  | Mrpl21 | 39S ribosomal protein L21, mitochondrial                        | 3  | 3  | 6  | 12 | -0.25   |  | 0 | 1 | 2 | 3  | -0.28   |
| 262263310 | Mrpl22 | 39S ribosomal protein L22, mitochondrial precursor              | 10 | 7  | 8  | 25 | -0.21   |  | 0 | 0 | 0 | 0  |         |
| 6755352   | Mrpl23 | 39S ribosomal protein L23, mitochondrial                        | 3  | 6  | 6  | 15 | -0.23   |  | 0 | 2 | 2 | 4  | -0.33   |
| 153792729 | Mrpl24 | 39S ribosomal protein L24, mitochondrial precursor              | 4  | 5  | 4  | 13 | -0.19   |  | 0 | 1 | 0 | 1  | -0.67 # |
| 16716447  | Mrpl27 | 39S ribosomal protein L27, mitochondrial                        | 3  | 0  | 2  | 5  | -0.02   |  | 0 | 0 | 0 | 0  |         |
| 26787989  | Mrpl28 | 39S ribosomal protein L28, mitochondrial precursor              | 1  | 4  | 1  | 6  | -0.14   |  | 0 | 0 | 0 | 0  |         |
| 31981470  | Mrpl3  | 39S ribosomal protein L3, mitochondrial                         | 2  | 2  | 2  | 6  | -0.16 * |  | 0 | 0 | 1 | 1  | 0.35    |
| 21312302  | Mrpl30 | 39S ribosomal protein L30, mitochondrial precursor              | 3  | 5  | 3  | 11 | -0.23   |  | 0 | 0 | 0 | 0  |         |
| 21312948  | Mrpl32 | 39S ribosomal protein L32, mitochondrial precursor              | 4  | 0  | 2  | 6  | -0.29   |  | 0 | 0 | 0 | 0  |         |
| 269784741 | Mrpl33 | 39S ribosomal protein L33, mitochondrial                        | 1  | 1  | 0  | 2  | -0.08   |  | 0 | 0 | 0 | 0  |         |
| 16716449  | Mrpl34 | 39S ribosomal protein L34, mitochondrial precursor              | 1  | 0  | 1  | 2  | -0.53   |  | 0 | 0 | 0 | 0  |         |



|           |          |                                                             |    |    |    |     |         |    |    |    |     |         |
|-----------|----------|-------------------------------------------------------------|----|----|----|-----|---------|----|----|----|-----|---------|
| 22128625  | Mrpl37   | 39S ribosomal protein L37, mitochondrial precursor          | 2  | 2  | 4  | 8   | -0.06   | 0  | 0  | 0  | 0   |         |
| 124430535 | Mrpl38   | 39S ribosomal protein L38, mitochondrial precursor          | 0  | 0  | 3  | 3   | -0.28   | 0  | 0  | 0  | 0   |         |
| 31560438  | Mrpl39   | 39S ribosomal protein L39, mitochondrial                    | 4  | 3  | 3  | 10  | -0.18   | 0  | 0  | 1  | 1   | 0.22    |
| 119508437 | Mrpl4    | 39S ribosomal protein L4, mitochondrial                     | 7  | 7  | 7  | 21  | -0.16   | 0  | 0  | 0  | 0   |         |
| 255003746 | Mrpl40   | 39S ribosomal protein L40, mitochondrial precursor          | 7  | 8  | 5  | 20  | -0.20 * | 0  | 2  | 2  | 4   | 0.23    |
| 113461980 | Mrpl41   | 39S ribosomal protein L41, mitochondrial precursor          | 8  | 3  | 6  | 17  | -0.12   | 0  | 0  | 0  | 0   |         |
| 13385564  | Mrpl42   | 39S ribosomal protein L42, mitochondrial precursor          | 1  | 0  | 3  | 4   | -0.13   | 0  | 0  | 0  | 0   |         |
| 17298676  | Mrpl43   | 39S ribosomal protein L43, mitochondrial                    | 1  | 1  | 1  | 3   | -1.43 # | 0  | 0  | 0  | 0   |         |
| 124487075 | Mrpl44   | 39S ribosomal protein L44, mitochondrial precursor          | 1  | 2  | 4  | 7   | 1.04 #  | 1  | 0  | 2  | 3   | 4.10 #  |
| 13385418  | Mrpl45   | 39S ribosomal protein L45, mitochondrial precursor          | 1  | 5  | 3  | 9   | -0.21   | 0  | 2  | 1  | 3   | -0.49 # |
| 12963643  | Mrpl46   | 39S ribosomal protein L46, mitochondrial precursor          | 7  | 10 | 9  | 26  | -0.17   | 0  | 0  | 0  | 0   |         |
| 29826332  | Mrpl47   | 39S ribosomal protein L47, mitochondrial precursor          | 1  | 4  | 1  | 6   | 0.11    | 0  | 0  | 2  | 2   | -0.26   |
| 148368964 | Mrpl48   | 39S ribosomal protein L48, mitochondrial precursor          | 4  | 3  | 1  | 8   | -0.14   | 0  | 0  | 0  | 0   |         |
| 13385752  | Mrpl49   | 39S ribosomal protein L49, mitochondrial                    | 6  | 9  | 5  | 20  | 0.10    | 0  | 1  | 2  | 3   | -0.10   |
| 30519921  | Mrpl50   | 39S ribosomal protein L50, mitochondrial                    | 0  | 1  | 3  | 4   | -0.22   | 0  | 0  | 0  | 0   |         |
| 13385050  | Mrpl51   | 39S ribosomal protein L51, mitochondrial precursor          | 3  | 0  | 0  | 3   | -0.06   | 0  | 0  | 0  | 0   |         |
| 30348981  | Mrpl52   | 39S ribosomal protein L52, mitochondrial precursor          | 3  | 0  | 0  | 3   | -0.22   | 0  | 0  | 0  | 0   |         |
| 21313040  | Mrpl53   | 39S ribosomal protein L53, mitochondrial precursor          | 4  | 2  | 4  | 10  | -0.18   | 2  | 0  | 0  | 2   | -0.13   |
| 13384682  | Mrpl54   | 39S ribosomal protein L54, mitochondrial precursor          | 4  | 0  | 2  | 6   | -0.21   | 0  | 0  | 0  | 0   |         |
| 21313400  | Mrpl55   | 39S ribosomal protein L55, mitochondrial precursor          | 8  | 2  | 5  | 15  | -0.18   | 1  | 0  | 2  | 3   | -1.36 # |
| 29789253  | Mrpl9    | 39S ribosomal protein L9, mitochondrial precursor           | 7  | 8  | 7  | 22  | -0.13   | 0  | 3  | 0  | 3   | -0.19   |
| 6681255   | Ebp      | 3-beta-hydroxysteroid-Delta(8),Delta(7)-isomerase           | 2  | 0  | 1  | 3   | -0.56   | 9  | 0  | 2  | 11  | -0.36   |
| 84872191  | Ptplb    | 3-hydroxyacyl-CoA dehydratase 2                             | 2  | 2  | 2  | 6   | -0.33   | 0  | 2  | 2  | 4   | -0.33   |
| 171184435 | Ptplad1  | 3-hydroxyacyl-CoA dehydratase 3                             | 1  | 2  | 0  | 3   | -0.13   | 0  | 1  | 1  | 2   | -0.22   |
| 61888838  | Hsd17b10 | 3-hydroxyacyl-CoA dehydrogenase type-2                      | 62 | 92 | 97 | 251 | -0.14   | 17 | 56 | 47 | 120 | -0.08 * |
| 21704140  | Hibadh   | 3-hydroxyisobutyrate dehydrogenase, mitochondrial precursor | 17 | 5  | 14 | 36  | -0.19   | 1  | 0  | 2  | 3   | -0.23   |
| 22122625  | Hibch    | 3-hydroxyisobutyryl-CoA hydrolase, mitochondrial precursor  | 4  | 0  | 0  | 4   | -0.18   | 0  | 0  | 0  | 0   |         |
| 18700004  | Acaa1a   | 3-ketoacyl-CoA thiolase A, peroxisomal precursor            | 33 | 28 | 32 | 93  | -0.07   | 0  | 8  | 12 | 20  | -0.17   |
| 22122797  | Acaa1b   | 3-ketoacyl-CoA thiolase B, peroxisomal precursor            | 0  | 0  | 0  | 0   |         | 4  | 0  | 0  | 4   | 0.37    |
| 29126205  | Acaa2    | 3-ketoacyl-CoA thiolase, mitochondrial                      | 51 | 53 | 75 | 179 | 0.02    | 20 | 41 | 46 | 107 | -0.14   |
| 110625780 | Kdsr     | 3-ketodihydrosphingosine reductase precursor                | 1  | 0  | 0  | 1   | -0.20   | 0  | 0  | 0  | 0   |         |
| 244789999 | Mpst     | 3-mercaptopyruvate sulfurtransferase                        | 5  | 1  | 3  | 9   | -0.27   | 0  | 1  | 3  | 4   | -0.06   |
| 13399310  | Rps10    | 40S ribosomal protein S10                                   | 13 | 8  | 6  | 27  | 0.00    | 4  | 12 | 2  | 18  | -0.10   |
| 21426889  | Rps11    | 40S ribosomal protein S11                                   | 6  | 4  | 4  | 14  | -0.22   | 18 | 13 | 15 | 46  | -0.04   |
| 149250091 | Gm14059  | 40S ribosomal protein S12-like                              | 14 | 22 | 15 | 51  | -0.03   | 0  | 1  | 6  | 7   | -0.41   |
| 309267082 | Gm12270  | 40S ribosomal protein S13-like                              | 0  | 0  | 0  | 0   |         | 0  | 11 | 0  | 11  | 0.02    |
| 309271989 | Gm12270  | 40S ribosomal protein S13-like                              | 0  | 11 | 0  | 11  | -0.18   | 14 | 0  | 12 | 26  | 0.01    |

|           |               |                                                           |     |    |    |     |         |    |    |    |     |         |  |
|-----------|---------------|-----------------------------------------------------------|-----|----|----|-----|---------|----|----|----|-----|---------|--|
| 309266131 | Gm15483       | 40S ribosomal protein S13-like                            | 5   | 0  | 2  | 7   | 0.01    | 0  | 0  | 0  | 0   |         |  |
| 31981100  | Rps14         | 40S ribosomal protein S14                                 | 22  | 20 | 9  | 51  | -0.11   | 29 | 7  | 16 | 52  | -0.02   |  |
| 6677799   | Rps15         | 40S ribosomal protein S15                                 | 7   | 5  | 5  | 17  | -0.08   | 13 | 15 | 14 | 42  | 0.04    |  |
| 24762230  | Rps15a        | 40S ribosomal protein S15a                                | 5   | 1  | 1  | 7   | -0.06   | 11 | 2  | 0  | 13  | -0.21   |  |
| 158966704 | Rps16         | 40S ribosomal protein S16                                 | 7   | 6  | 4  | 17  | -0.20   | 21 | 5  | 14 | 40  | 0.01    |  |
| 6677801   | Rps17         | 40S ribosomal protein S17                                 | 19  | 23 | 9  | 51  | -0.13   | 40 | 23 | 25 | 88  | -0.04   |  |
| 149264635 | Gm10260       | 40S ribosomal protein S18-like                            | 2   | 5  | 1  | 8   | 0.35    | 0  | 0  | 14 | 14  | 0.00    |  |
| 309262972 | Gm10260       | 40S ribosomal protein S18-like                            | 0   | 0  | 0  | 0   |         | 39 | 19 | 0  | 58  | -0.01   |  |
| 309262784 | LOC100503302  | 40S ribosomal protein S19-like                            | 13  | 16 | 8  | 37  | -0.13 * | 6  | 4  | 5  | 15  | 0.00    |  |
| 18087805  | Rps2          | 40S ribosomal protein S2                                  | 7   | 0  | 0  | 7   | -0.01   | 0  | 11 | 36 | 47  | 0.00    |  |
| 309264869 | Gm4332        | 40S ribosomal protein S20-like, partial                   | 7   | 9  | 9  | 25  | -0.17   | 6  | 4  | 7  | 17  | -0.21   |  |
| 21536222  | Rps21         | 40S ribosomal protein S21                                 | 6   | 7  | 6  | 19  | -0.32   | 0  | 0  | 0  | 0   |         |  |
| 149240882 | Gm8618        | 40S ribosomal protein S23-like                            | 0   | 0  | 0  | 0   |         | 0  | 0  | 1  | 1   | -0.81 # |  |
| 46519156  | Rps24         | 40S ribosomal protein S24 isoform 1                       | 6   | 3  | 3  | 12  | -0.16   | 35 | 11 | 14 | 60  | -0.05   |  |
| 82943174  | Gm6988        | 40S ribosomal protein S25-like                            | 11  | 12 | 7  | 30  | -0.15 * | 8  | 8  | 7  | 23  | -0.35   |  |
| 255003793 | Rps26         | 40S ribosomal protein S26                                 | 3   | 5  | 4  | 12  | -0.06   | 33 | 10 | 17 | 60  | 0.01    |  |
| 13385958  | Rps27l        | 40S ribosomal protein S27-like                            | 0   | 0  | 0  | 0   |         | 0  | 7  | 0  | 7   | 0.01    |  |
| 21426821  | Rps28         | 40S ribosomal protein S28                                 | 9   | 5  | 7  | 21  | -0.08   | 4  | 2  | 2  | 8   | -0.04   |  |
| 94383782  | Gm8841        | 40S ribosomal protein S2-like                             | 0   | 0  | 0  | 0   |         | 18 | 0  | 0  | 18  | 0.04    |  |
| 309263479 | Gm10237       | 40S ribosomal protein S2-like                             | 0   | 0  | 0  | 0   |         | 0  | 0  | 2  | 2   | -0.01   |  |
| 309263641 | Gm8225        | 40S ribosomal protein S2-like                             | 0   | 0  | 3  | 3   | -0.19   | 0  | 5  | 2  | 7   | -0.16   |  |
| 309266362 | Gm8841        | 40S ribosomal protein S2-like                             | 0   | 6  | 0  | 6   | -0.51   | 0  | 0  | 0  | 0   |         |  |
| 82902507  | LOC639606     | 40S ribosomal protein S2-like isoform 1                   | 5   | 6  | 0  | 11  | -0.68 # | 12 | 17 | 26 | 55  | 0.10    |  |
| 6755372   | Rps3          | 40S ribosomal protein S3                                  | 21  | 23 | 22 | 66  | -0.13   | 34 | 50 | 70 | 154 | -0.06   |  |
| 149265827 | Gm10119       | 40S ribosomal protein S3a-like                            | 19  | 17 | 15 | 51  | -0.34   | 33 | 20 | 41 | 94  | -0.29   |  |
| 6677805   | Rps4x         | 40S ribosomal protein S4, X isoform                       | 20  | 20 | 7  | 47  | -0.26   | 33 | 53 | 41 | 127 | -0.05   |  |
| 254675270 | Rps5          | 40S ribosomal protein S5                                  | 27  | 33 | 21 | 81  | -0.19 * | 70 | 40 | 51 | 161 | -0.07   |  |
| 94367038  | Gm13654       | 40S ribosomal protein S6-like isoform 2                   | 3   | 4  | 0  | 7   | 0.00    | 42 | 31 | 41 | 114 | -0.08   |  |
| 6755376   | Rps7          | 40S ribosomal protein S7                                  | 28  | 32 | 12 | 72  | 0.01    | 40 | 29 | 18 | 87  | 0.04    |  |
| 309265774 | LOC100502877  | 40S ribosomal protein S8-like                             | 0   | 0  | 0  | 0   |         | 0  | 0  | 27 | 27  | -2.21 # |  |
| 309265983 | Gm15501       | 40S ribosomal protein S8-like, partial                    | 9   | 9  | 10 | 28  | -0.23   | 54 | 48 | 40 | 142 | -0.07   |  |
| 33504483  | Rps9          | 40S ribosomal protein S9                                  | 2   | 3  | 1  | 6   | -0.14   | 29 | 16 | 10 | 55  | -0.08   |  |
| 309264022 | LOC100505031  | 40S ribosomal protein SA-like                             | 15  | 18 | 15 | 48  | -0.39 * | 19 | 33 | 59 | 111 | 0.08    |  |
| 20127399  | Nt5m          | 5'(3')-deoxyribonucleotidase, mitochondrial precursor     | 1   | 1  | 1  | 3   | -0.08 * | 0  | 0  | 0  | 0   |         |  |
| 117606214 | Xrn2          | 5'-3' exoribonuclease 2                                   | 27  | 40 | 18 | 85  | 0.14    | 17 | 44 | 45 | 106 | 0.44    |  |
| 94681061  | Prkaa1        | 5'-AMP-activated protein kinase catalytic subunit alpha-1 | 0   | 0  | 0  | 0   |         | 0  | 1  | 0  | 1   | -2.51 # |  |
| 124107596 | Prkag1        | 5'-AMP-activated protein kinase subunit gamma-1           | 1   | 1  | 1  | 3   | -0.22   | 0  | 9  | 11 | 20  | -0.18   |  |
| 21312554  | 2010107E04Rik | 6.8 kDa mitochondrial proteolipid                         | 1   | 0  | 0  | 1   | -0.15   | 0  | 0  | 0  | 0   |         |  |
| 183396771 | Hspd1         | 60 kDa heat shock protein, mitochondrial                  | 107 | 48 | 74 | 229 | -0.11   | 59 | 37 | 29 | 125 | -0.10   |  |
| 6671569   | Rplp0         | 60S acidic ribosomal protein P0                           | 7   | 15 | 18 | 40  | -0.13 * | 55 | 47 | 65 | 167 | -0.10   |  |
| 309266351 | Gm8730        | 60S acidic ribosomal protein P0-like                      | 14  | 12 | 19 | 45  | -0.22 * | 37 | 37 | 65 | 139 | -0.04   |  |
| 9256519   | Rplp1         | 60S acidic ribosomal protein P1                           | 8   | 9  | 7  | 24  | -0.15   | 16 | 7  | 9  | 32  | -0.07   |  |
| 83745120  | Rplp2         | 60S acidic ribosomal protein P2                           | 26  | 16 | 27 | 69  | -0.06   | 81 | 9  | 16 | 106 | 0.05    |  |
| 16418339  | Rpl10         | 60S ribosomal protein L10                                 | 0   | 9  | 0  | 9   | -0.17   | 0  | 27 | 32 | 59  | -0.14   |  |
| 255003735 | Rpl10a        | 60S ribosomal protein L10a                                | 5   | 9  | 4  | 18  | -0.08   | 24 | 29 | 18 | 71  | -0.03   |  |
| 309266590 | Gm5621        | 60S ribosomal protein L10-like                            | 8   | 0  | 0  | 8   | 0.06    | 28 | 0  | 0  | 28  | 0.06    |  |
| 82931053  | Gm5621        | 60S ribosomal protein L10-like isoform 2                  | 0   | 0  | 4  | 4   | -0.52   | 0  | 0  | 0  | 0   |         |  |
| 13385408  | Rpl11         | 60S ribosomal protein L11                                 | 9   | 14 | 7  | 30  | -0.14   | 26 | 15 | 34 | 75  | -0.07   |  |
| 160333553 | Rpl12         | 60S ribosomal protein L12                                 | 20  | 16 | 21 | 57  | -0.01   | 76 | 27 | 34 | 137 | 0.03    |  |
| 31981945  | Rpl13a        | 60S ribosomal protein L13a                                | 1   | 1  | 0  | 2   | -0.02   | 3  | 6  | 0  | 9   | -0.97 # |  |
| 309263460 | LOC638236     | 60S ribosomal protein L13a-like                           | 0   | 0  | 1  | 1   | -0.17   | 0  | 0  | 0  | 0   |         |  |
| 149251177 | Gm10071       | 60S ribosomal protein L13-like                            | 5   | 9  | 2  | 16  | -0.02   | 33 | 20 | 27 | 80  | -0.02   |  |
| 13385472  | Rpl14         | 60S ribosomal protein L14                                 | 5   | 9  | 4  | 18  | 0.01    | 42 | 30 | 24 | 96  | -0.02   |  |
| 82896911  | Gm5292        | 60S ribosomal protein L15-like                            | 2   | 5  | 3  | 10  | -0.12   | 0  | 5  | 5  | 10  | -0.14   |  |

|           |              |                                                                |    |    |    |     |         |  |     |    |     |     |         |  |
|-----------|--------------|----------------------------------------------------------------|----|----|----|-----|---------|--|-----|----|-----|-----|---------|--|
| 82984224  | LOC634785    | 60S ribosomal protein L15-like                                 | 0  | 0  | 0  | 0   |         |  | 20  | 21 | 11  | 52  | -0.06   |  |
| 161484662 | Rpl17        | 60S ribosomal protein L17                                      | 6  | 2  | 1  | 9   | -0.09   |  | 17  | 26 | 11  | 54  | -0.02   |  |
| 83699424  | Rpl18        | 60S ribosomal protein L18                                      | 5  | 9  | 3  | 17  | -0.15   |  | 74  | 33 | 29  | 136 | -0.14   |  |
| 58037465  | Rpl18a       | 60S ribosomal protein L18a                                     | 3  | 3  | 3  | 9   | 0.01    |  | 22  | 15 | 14  | 51  | -0.11   |  |
| 82904428  | Gm4883       | 60S ribosomal protein L18a-like                                | 0  | 1  | 0  | 1   | 9.84 #  |  | 0   | 0  | 0   | 0   |         |  |
| 226958657 | Rpl19        | 60S ribosomal protein L19 isoform 2                            | 3  | 9  | 5  | 17  | -0.15   |  | 22  | 11 | 11  | 44  | 0.00    |  |
| 309262317 | Gm4478       | 60S ribosomal protein L21-like                                 | 0  | 0  | 0  | 0   |         |  | 0   | 5  | 0   | 5   | 0.74 #  |  |
| 309262452 | Gm11703      | 60S ribosomal protein L21-like                                 | 6  | 8  | 6  | 20  | -0.06   |  | 28  | 22 | 22  | 72  | -0.02   |  |
| 309265792 | LOC100504863 | 60S ribosomal protein L22-like                                 | 11 | 10 | 6  | 27  | 0.00    |  | 36  | 5  | 8   | 49  | -0.02   |  |
| 13386010  | Rpl2211      | 60S ribosomal protein L22-like 1                               | 2  | 6  | 3  | 11  | -0.08   |  | 3   | 0  | 3   | 6   | 0.07    |  |
| 12584986  | Rpl23        | 60S ribosomal protein L23                                      | 0  | 14 | 0  | 14  | -0.19   |  | 56  | 0  | 0   | 56  | 0.08    |  |
| 149265809 | Gm10132      | 60S ribosomal protein L23a-like                                | 6  | 7  | 0  | 13  | -0.08   |  | 11  | 12 | 0   | 23  | 0.16    |  |
| 309263233 | Gm3362       | 60S ribosomal protein L23a-like                                | 0  | 0  | 3  | 3   | -0.10   |  | 0   | 0  | 6   | 6   | -0.10   |  |
| 149269218 | LOC100044627 | 60S ribosomal protein L24                                      | 15 | 0  | 6  | 21  | -0.14   |  | 0   | 17 | 33  | 50  | -0.03   |  |
| 18250296  | Rpl24        | 60S ribosomal protein L24                                      | 7  | 5  | 4  | 16  | -0.12   |  | 27  | 15 | 15  | 57  | -0.04   |  |
| 6677777   | Rpl26        | 60S ribosomal protein L26                                      | 1  | 5  | 2  | 8   | 0.07    |  | 1   | 3  | 4   | 8   | 0.03    |  |
| 149262383 | Gm11518      | 60S ribosomal protein L27                                      | 11 | 10 | 10 | 31  | -0.02   |  | 18  | 7  | 10  | 35  | 0.03    |  |
| 309264589 | Gm14044      | 60S ribosomal protein L27a                                     | 0  | 2  | 0  | 2   | -0.24   |  | 6   | 4  | 4   | 14  | 0.18    |  |
| 309265674 | Gm8213       | 60S ribosomal protein L27a-like                                | 1  | 0  | 0  | 1   | 0.13    |  | 0   | 0  | 1   | 1   | -0.15   |  |
| 6677779   | Rpl28        | 60S ribosomal protein L28                                      | 0  | 0  | 0  | 0   |         |  | 0   | 3  | 1   | 4   | -0.26   |  |
| 309265470 | Gm10051      | 60S ribosomal protein L28-like                                 | 0  | 0  | 0  | 0   |         |  | 0   | 0  | 1   | 1   | -0.39   |  |
| 309265894 | Gm6887       | 60S ribosomal protein L29-like                                 | 0  | 0  | 0  | 0   |         |  | 0   | 1  | 0   | 1   | -0.58 # |  |
| 309263481 | LOC100503125 | 60S ribosomal protein L29-like                                 | 0  | 0  | 0  | 0   |         |  | 0   | 1  | 0   | 1   | -0.17   |  |
| 309262958 | Gm8210       | 60S ribosomal protein L29-like                                 | 0  | 0  | 0  | 0   |         |  | 0   | 3  | 0   | 3   | -0.25   |  |
| 255308899 | Rpl3         | 60S ribosomal protein L3                                       | 0  | 9  | 11 | 20  | 0.08    |  | 0   | 28 | 34  | 62  | -0.29   |  |
| 309266869 | LOC100504405 | 60S ribosomal protein L30-like                                 | 20 | 17 | 22 | 59  | -0.07   |  | 61  | 17 | 19  | 97  | -0.08   |  |
| 149251558 | Gm6570       | 60S ribosomal protein L30-like                                 | 1  | 0  | 0  | 1   | 0.18    |  | 0   | 0  | 0   | 0   |         |  |
| 82898755  | LOC638399    | 60S ribosomal protein L31-like isoform 1                       | 5  | 10 | 6  | 21  | -0.10   |  | 41  | 7  | 9   | 57  | -0.03   |  |
| 25742730  | Rpl32        | 60S ribosomal protein L32                                      | 7  | 7  | 2  | 16  | -0.06   |  | 0   | 10 | 3   | 13  | -0.12   |  |
| 309263511 | LOC100504872 | 60S ribosomal protein L32-like                                 | 0  | 0  | 0  | 0   |         |  | 36  | 0  | 14  | 50  | 0.00    |  |
| 309262801 | Gm10029      | 60S ribosomal protein L35a-like                                | 0  | 0  | 0  | 0   |         |  | 2   | 0  | 0   | 2   | 0.04    |  |
| 149245216 | Gm2000       | 60S ribosomal protein L35-like                                 | 3  | 3  | 1  | 7   | -0.15 * |  | 16  | 8  | 7   | 31  | -0.07   |  |
| 94385943  | Gm5745       | 60S ribosomal protein L36-like                                 | 0  | 0  | 0  | 0   |         |  | 5   | 5  | 2   | 12  | 0.25    |  |
| 82887594  | Gm14173      | 60S ribosomal protein L37a-like                                | 3  | 1  | 0  | 4   | -0.20   |  | 12  | 4  | 5   | 21  | 0.05    |  |
| 114205444 | Rpl38        | 60S ribosomal protein L38                                      | 5  | 4  | 2  | 11  | -0.06   |  | 18  | 3  | 3   | 24  | 0.03    |  |
| 309268181 | Gm12816      | 60S ribosomal protein L3-like                                  | 4  | 6  | 11 | 21  | 0.17    |  | 20  | 28 | 51  | 99  | 0.03    |  |
| 309266996 | Gm12816      | 60S ribosomal protein L3-like, partial                         | 0  | 0  | 0  | 0   |         |  | 0   | 0  | 2   | 2   | -0.17   |  |
| 30794450  | Rpl4         | 60S ribosomal protein L4                                       | 2  | 0  | 7  | 9   | 0.07    |  | 103 | 98 | 120 | 321 | -0.01   |  |
| 309265383 | LOC100503670 | 60S ribosomal protein L5-like isoform 3                        | 28 | 36 | 28 | 92  | -0.11   |  | 15  | 27 | 38  | 80  | -0.06   |  |
| 82881056  | Gm6136       | 60S ribosomal protein L6-like                                  | 0  | 0  | 11 | 11  | -0.03   |  | 0   | 31 | 0   | 31  | -0.02   |  |
| 309267059 | LOC100046435 | 60S ribosomal protein L6-like                                  | 2  | 7  | 0  | 9   | 0.09    |  | 76  | 33 | 82  | 191 | -0.09   |  |
| 31981515  | Rpl7         | 60S ribosomal protein L7                                       | 5  | 4  | 7  | 16  | 0.03    |  | 39  | 40 | 44  | 123 | 0.03    |  |
| 7305443   | Rpl7a        | 60S ribosomal protein L7a                                      | 3  | 1  | 3  | 7   | -0.16   |  | 51  | 50 | 58  | 159 | -0.04   |  |
| 82950040  | Gm11362      | 60S ribosomal protein L7a-like                                 | 0  | 0  | 0  | 0   |         |  | 17  | 0  | 17  | 34  | -0.02   |  |
| 27754134  | Rpl711       | 60S ribosomal protein L7-like 1                                | 0  | 0  | 0  | 0   |         |  | 4   | 6  | 7   | 17  | 0.04    |  |
| 6755358   | Rpl8         | 60S ribosomal protein L8                                       | 3  | 10 | 6  | 19  | -0.08   |  | 26  | 29 | 30  | 85  | -0.10   |  |
| 14149647  | Rpl9         | 60S ribosomal protein L9                                       | 50 | 52 | 27 | 129 | -0.12   |  | 52  | 47 | 34  | 133 | -0.12   |  |
| 257153336 | Nip7         | 60S ribosome subunit biogenesis protein NIP7 homolog isoform 1 | 8  | 12 | 4  | 24  | 0.10    |  | 0   | 15 | 9   | 24  | 0.08    |  |
| 257153334 | Nip7         | 60S ribosome subunit biogenesis protein NIP7 homolog isoform 2 | 0  | 0  | 0  | 0   |         |  | 4   | 0  | 0   | 4   | 0.24    |  |
| 9790051   | Pfkl         | 6-phosphofruktokinase type C                                   | 0  | 0  | 0  | 0   |         |  | 0   | 7  | 64  | 71  | -0.33   |  |
| 31560653  | Pfkl         | 6-phosphofruktokinase, liver type                              | 6  | 4  | 2  | 12  | -0.14   |  | 21  | 59 | 138 | 218 | -0.55 # |  |
| 124486895 | Pgd          | 6-phosphogluconate dehydrogenase, decarboxylating              | 0  | 1  | 2  | 3   | -0.01   |  | 0   | 0  | 1   | 1   | 0.08    |  |
| 13384778  | Pgls         | 6-phosphogluconolactonase                                      | 0  | 1  | 0  | 1   | 0.50    |  | 0   | 8  | 12  | 20  | 0.13    |  |

|           |          |                                                                   |     |     |     |     |         |     |     |     |      |          |
|-----------|----------|-------------------------------------------------------------------|-----|-----|-----|-----|---------|-----|-----|-----|------|----------|
| 254540166 | Hspa5    | 78 kDa glucose-regulated protein precursor                        | 45  | 32  | 50  | 127 | -0.15   | 132 | 32  | 109 | 273  | -0.11    |
| 109627648 | Mcm3ap   | 80 kDa MCM3-associated protein                                    | 15  | 29  | 18  | 62  | -0.01   | 0   | 2   | 6   | 8    | 0.00     |
| 269784760 | Abhd10   | abhydrolase domain-containing protein 10, mitochondrial precursor | 0   | 1   | 2   | 3   | -0.06   | 0   | 0   | 0   | 0    |          |
| 299473805 | Abhd11   | abhydrolase domain-containing protein 11 isoform 2                | 1   | 2   | 0   | 3   | -0.10   | 0   | 0   | 0   | 0    |          |
| 171460960 | Abhd14b  | abhydrolase domain-containing protein 14B                         | 1   | 1   | 2   | 4   | 0.15    | 0   | 5   | 5   | 10   | -0.05    |
| 21313408  | Abi3     | ABI gene family member 3 isoform 1                                | 0   | 0   | 1   | 1   | 0.50    | 0   | 0   | 0   | 0    |          |
| 116089351 | Abi1     | abl interactor 1 isoform 5                                        | 4   | 8   | 4   | 16  | -0.47 * | 0   | 0   | 0   | 0    |          |
| 163965368 | Aim1     | absent in melanoma 1 protein                                      | 0   | 4   | 0   | 4   | 1.62 #  | 0   | 0   | 1   | 1    | 0.52 #   |
| 21313520  | Aacs     | acetoacetyl-CoA synthetase                                        | 0   | 0   | 0   | 0   |         | 0   | 0   | 2   | 2    | -0.12    |
| 30424591  | Ilvbl    | acetolactate synthase-like protein                                | 3   | 0   | 0   | 3   | -0.49   | 1   | 2   | 0   | 3    | 0.05     |
| 21450129  | Acat1    | acetyl-CoA acetyltransferase, mitochondrial precursor             | 64  | 70  | 63  | 197 | -0.14   | 6   | 20  | 18  | 44   | -0.11    |
| 31543730  | Slc33a1  | acetyl-coenzyme A transporter 1                                   | 0   | 0   | 0   | 0   |         | 2   | 0   | 0   | 2    | -0.13    |
| 9790019   | Asah1    | acid ceramidase precursor                                         | 50  | 39  | 42  | 131 | 0.05    | 22  | 16  | 18  | 56   | 0.09     |
| 19527104  | Smpdl3b  | acid sphingomyelinase-like phosphodiesterase 3b precursor         | 0   | 0   | 0   | 0   |         | 1   | 3   | 0   | 4    | 0.59 #   |
| 40254600  | Anp32a   | acidic leucine-rich nuclear phosphoprotein 32 family member A     | 5   | 5   | 6   | 16  | 0.02    | 37  | 26  | 40  | 103  | -0.15    |
| 18700032  | Anp32b   | acidic leucine-rich nuclear phosphoprotein 32 family member B     | 0   | 4   | 1   | 5   | 0.24 *  | 4   | 2   | 6   | 12   | -0.12    |
| 254587996 | Anp32e   | acidic leucine-rich nuclear phosphoprotein 32 family member E     | 2   | 3   | 4   | 9   | -0.14   | 16  | 23  | 44  | 83   | -0.12    |
| 18079339  | Aco2     | aconitate hydratase, mitochondrial precursor                      | 41  | 21  | 34  | 96  | -0.15   | 9   | 12  | 28  | 49   | -0.15    |
| 14192922  | Actc1    | actin, alpha cardiac muscle 1                                     | 46  | 53  | 63  | 162 | 0.33    | 0   | 65  | 0   | 65   | 0.14     |
| 6671509   | Actb     | actin, cytoplasmic 1                                              | 191 | 256 | 231 | 678 | 0.31    | 565 | 637 | 640 | 1842 | 0.31     |
| 157823889 | Actg2    | actin, gamma-enteric smooth muscle                                | 25  | 41  | 47  | 113 | 0.34    | 184 | 105 | 216 | 505  | 0.28     |
| 157057174 | Ablim1   | actin-binding LIM protein 1 isoform 2                             | 1   | 0   | 0   | 1   | 0.19    | 0   | 0   | 0   | 0    |          |
| 157057554 | Ablim1   | actin-binding LIM protein 1 isoform 3                             | 0   | 2   | 0   | 2   | 0.77 #  | 0   | 0   | 0   | 0    |          |
| 251823794 | Anln     | actin-binding protein anillin                                     | 1   | 5   | 2   | 8   | 0.27    | 0   | 0   | 0   | 0    |          |
| 189181668 | Actl6a   | actin-like protein 6A                                             | 52  | 59  | 47  | 158 | 0.27    | 33  | 50  | 42  | 125  | 0.18     |
| 226246593 | Actr10   | actin-related protein 10                                          | 2   | 2   | 0   | 4   | 0.43    | 0   | 0   | 0   | 0    |          |
| 22122825  | Actr2    | actin-related protein 2                                           | 40  | 43  | 22  | 105 | 0.22    | 17  | 36  | 23  | 76   | 0.69 #   |
| 9790221   | Arpc1a   | actin-related protein 2/3 complex subunit 1A                      | 5   | 5   | 0   | 10  | 0.27    | 0   | 0   | 0   | 0    |          |
| 160837788 | Arpc1b   | actin-related protein 2/3 complex subunit 1B                      | 14  | 21  | 11  | 46  | 0.27    | 6   | 14  | 12  | 32   | 0.47 *,# |
| 112363072 | Arpc2    | actin-related protein 2/3 complex subunit 2                       | 27  | 29  | 27  | 83  | 0.24    | 3   | 20  | 16  | 39   | 0.54 *,# |
| 9790141   | Arpc3    | actin-related protein 2/3 complex subunit 3                       | 12  | 18  | 10  | 40  | 0.24    | 8   | 5   | 7   | 20   | 0.46 #   |
| 13386054  | Arpc4    | actin-related protein 2/3 complex subunit 4 isoform 1             | 21  | 20  | 21  | 62  | 0.27    | 14  | 17  | 12  | 43   | 0.42 *   |
| 224809382 | Arpc5    | actin-related protein 2/3 complex subunit 5                       | 21  | 19  | 10  | 50  | 0.23    | 7   | 7   | 4   | 18   | 0.46 *,# |
| 21312654  | Arpc5l   | actin-related protein 2/3 complex subunit 5-like protein          | 8   | 7   | 5   | 20  | 0.35    | 1   | 4   | 1   | 6    | 0.49 *,# |
| 23956222  | Actr3    | actin-related protein 3                                           | 50  | 51  | 30  | 131 | 0.21    | 32  | 35  | 36  | 103  | 0.54 *,# |
| 91176335  | Actr5    | actin-related protein 5                                           | 7   | 9   | 1   | 17  | 0.22    | 0   | 0   | 0   | 0    |          |
| 21313172  | Actr6    | actin-related protein 6                                           | 0   | 2   | 3   | 5   | -0.10   | 0   | 3   | 1   | 4    | -0.02    |
| 188528622 | Actr8    | actin-related protein 8                                           | 1   | 8   | 2   | 11  | 0.15    | 0   | 1   | 0   | 1    | 0.94 #   |
| 6755364   | Sub1     | activated RNA polymerase II transcriptional coactivator p15       | 19  | 56  | 25  | 100 | -0.10   | 9   | 7   | 13  | 29   | -0.08    |
| 22122515  | Ahsa1    | activator of 90 kDa heat shock protein ATPase homolog 1           | 0   | 0   | 0   | 0   |         | 1   | 5   | 4   | 10   | -0.07    |
| 30424711  | Rps19bp1 | active regulator of SIRT1                                         | 10  | 13  | 3   | 26  | -0.18   | 1   | 4   | 11  | 16   | 0.06     |
| 90093349  | Adnp     | activity-dependent neuroprotector homeobox protein                | 8   | 15  | 11  | 34  | 0.31 *  | 18  | 62  | 70  | 150  | 0.38 *   |

|           |               |                                                                 |    |    |    |    |          |  |    |    |    |     |         |
|-----------|---------------|-----------------------------------------------------------------|----|----|----|----|----------|--|----|----|----|-----|---------|
| 149258261 | Gm4459        | acyl carrier protein, mitochondrial-like                        | 3  | 2  | 4  | 9  | -0.22    |  | 10 | 0  | 4  | 14  | 0.07    |
| 74271799  | Acad11        | acyl-CoA dehydrogenase family member 11                         | 2  | 2  | 2  | 6  | -0.03    |  | 0  | 0  | 0  | 0   |         |
| 100817933 | Acad9         | acyl-CoA dehydrogenase family member 9, mitochondrial precursor | 2  | 1  | 0  | 3  | -0.41    |  | 0  | 1  | 1  | 2   | -0.13   |
| 24418933  | Acsf2         | acyl-CoA synthetase family member 2, mitochondrial precursor    | 3  | 0  | 0  | 3  | -0.15    |  | 0  | 3  | 3  | 6   | -0.27   |
| 6681137   | Dbi           | acyl-CoA-binding protein isoform 2                              | 0  | 0  | 1  | 1  | -0.30    |  | 0  | 0  | 0  | 0   |         |
| 30520215  | Acsm5         | acyl-coenzyme A synthetase ACSM5, mitochondrial precursor       | 1  | 0  | 1  | 2  | -3.86 #  |  | 1  | 0  | 1  | 2   | -5.57 # |
| 13385260  | Acot13        | acyl-coenzyme A thioesterase 13                                 | 8  | 4  | 3  | 15 | -0.82 #  |  | 0  | 0  | 0  | 0   |         |
| 238624114 | Acot2         | acyl-coenzyme A thioesterase 2, mitochondrial precursor         | 4  | 0  | 0  | 4  | 0.27     |  | 0  | 0  | 0  | 0   |         |
| 254587964 | Acot8         | acyl-coenzyme A thioesterase 8                                  | 17 | 15 | 15 | 47 | -0.15    |  | 0  | 0  | 0  | 0   |         |
| 31980998  | Acot9         | acyl-coenzyme A thioesterase 9, mitochondrial                   | 1  | 0  | 0  | 1  | 0.02     |  | 0  | 0  | 2  | 2   | -0.60 # |
| 13384810  | Acyp1         | acylphosphatase-1                                               | 4  | 2  | 4  | 10 | 0.15     |  | 0  | 0  | 0  | 0   |         |
| 6678760   | Lypla1        | acyl-protein thioesterase 1                                     | 1  | 0  | 1  | 2  | 0.04     |  | 0  | 0  | 0  | 0   |         |
| 7242156   | Lypla2        | acyl-protein thioesterase 2                                     | 0  | 0  | 0  | 0  |          |  | 0  | 0  | 1  | 1   | 0.18    |
| 31559995  | Crk           | adapter molecule crk                                            | 0  | 0  | 0  | 0  |          |  | 0  | 4  | 8  | 12  | -0.16   |
| 118601013 | Aprt          | adenine phosphoribosyltransferase                               | 0  | 0  | 0  | 0  |          |  | 0  | 5  | 5  | 10  | 0.01    |
| 262263372 | Ahcy          | adenosylhomocysteinase                                          | 0  | 0  | 2  | 2  | -0.65 #  |  | 0  | 0  | 0  | 0   |         |
| 34328230  | Ak2           | adenylate kinase 2, mitochondrial isoform b                     | 10 | 5  | 9  | 24 | -0.11    |  | 0  | 0  | 1  | 1   | -0.19   |
| 18079237  | Taf9          | adenylate kinase isoenzyme 6 isoform 1                          | 7  | 19 | 9  | 35 | 0.20 *   |  | 0  | 0  | 0  | 0   |         |
| 6671519   | Adssl1        | adenylosuccinate synthetase isozyme 1                           | 1  | 1  | 5  | 7  | 0.26     |  | 2  | 3  | 17 | 22  | 0.20 *  |
| 31560737  | Adss          | adenylosuccinate synthetase isozyme 2                           | 0  | 0  | 0  | 0  |          |  | 0  | 0  | 1  | 1   | 0.23    |
| 21313668  | 2310001A20Rik | adipocyte plasma membrane-associated protein                    | 2  | 0  | 0  | 2  | -0.45    |  | 0  | 0  | 0  | 0   |         |
| 148747424 | Slc25a4       | ADP/ATP translocase 1                                           | 14 | 16 | 18 | 48 | 0.02     |  | 35 | 19 | 18 | 72  | 0.04    |
| 22094075  | Slc25a5       | ADP/ATP translocase 2                                           | 23 | 15 | 16 | 54 | 0.01     |  | 73 | 23 | 21 | 117 | 0.02    |
| 134288869 | Bst1          | ADP-ribosyl cyclase 2                                           | 0  | 0  | 0  | 0  |          |  | 1  | 8  | 1  | 10  | 0.56 #  |
| 6680716   | Arf1          | ADP-ribosylation factor 1                                       | 0  | 0  | 17 | 17 | -0.23    |  | 0  | 0  | 31 | 31  | -0.09   |
| 6680718   | Arf3          | ADP-ribosylation factor 3                                       | 16 | 17 | 0  | 33 | 0.06     |  | 30 | 9  | 0  | 39  | -0.02   |
| 6680720   | Arf4          | ADP-ribosylation factor 4                                       | 6  | 3  | 12 | 21 | -0.16    |  | 0  | 10 | 23 | 33  | -0.23   |
| 6680722   | Arf5          | ADP-ribosylation factor 5                                       | 5  | 8  | 15 | 28 | -0.11    |  | 34 | 6  | 22 | 62  | -0.05   |
| 6680724   | Arf6          | ADP-ribosylation factor 6                                       | 10 | 13 | 8  | 31 | -0.16    |  | 5  | 8  | 11 | 24  | -0.05   |
| 260763917 | Arfgap2       | ADP-ribosylation factor GTPase-activating protein 2 isoform 2   | 0  | 1  | 1  | 2  | 0.05     |  | 0  | 0  | 1  | 1   | 0.01    |
| 153792526 | Arl1          | ADP-ribosylation factor-like protein 1                          | 6  | 1  | 1  | 8  | -0.12    |  | 1  | 3  | 4  | 8   | -0.15   |
| 31980988  | Arl2          | ADP-ribosylation factor-like protein 2                          | 1  | 0  | 0  | 1  | 0.51     |  | 0  | 1  | 0  | 1   | -0.62 # |
| 9789881   | Arl3          | ADP-ribosylation factor-like protein 3                          | 0  | 2  | 0  | 2  | 0.25     |  | 0  | 0  | 3  | 3   | 0.04    |
| 13384792  | Arl4d         | ADP-ribosylation factor-like protein 4D                         | 0  | 0  | 0  | 0  |          |  | 0  | 0  | 1  | 1   | 1.60 #  |
| 188528681 | Arl6          | ADP-ribosylation factor-like protein 6                          | 0  | 2  | 0  | 2  | 0.46     |  | 0  | 0  | 2  | 2   | -0.16   |
| 21362283  | Arl6ip4       | ADP-ribosylation factor-like protein 6-interacting protein 4    | 1  | 5  | 3  | 9  | -0.01    |  | 0  | 0  | 0  | 0   |         |
| 254281227 | Arl6ip6       | ADP-ribosylation factor-like protein 6-interacting protein 6    | 2  | 4  | 3  | 9  | -0.13    |  | 4  | 4  | 2  | 10  | -0.23   |
| 23956194  | Arl8a         | ADP-ribosylation factor-like protein 8A                         | 0  | 0  | 1  | 1  | -0.60 #  |  | 1  | 0  | 0  | 1   | -0.05   |
| 13385518  | Arl8b         | ADP-ribosylation factor-like protein 8B                         | 6  | 4  | 1  | 11 | 0.01     |  | 0  | 2  | 1  | 3   | -0.04   |
| 60593059  | Acd           | adrenocortical dysplasia protein                                | 0  | 0  | 2  | 2  | -0.33    |  | 0  | 0  | 0  | 0   |         |
| 90017457  | Fdx1l         | adrenodoxin-like protein, mitochondrial precursor               | 1  | 0  | 0  | 1  | -1.10 #  |  | 0  | 0  | 0  | 0   |         |
| 226246550 | Scin          | adseverin isoform 1                                             | 19 | 34 | 17 | 70 | 0.17     |  | 15 | 28 | 32 | 75  | 0.28    |
| 226246552 | Scin          | adseverin isoform 2                                             | 0  | 0  | 0  | 0  |          |  | 0  | 0  | 1  | 1   | 0.12    |
| 17298672  | Aff4          | AF4/FMR2 family member 4                                        | 0  | 2  | 0  | 2  | 0.22     |  | 0  | 0  | 0  | 0   |         |
| 145587092 | Milt4         | afadin                                                          | 7  | 26 | 9  | 42 | 0.67 *,# |  | 0  | 1  | 4  | 5   | 0.10    |
| 110625761 | Afg3l2        | AFG3-like protein 2                                             | 1  | 1  | 0  | 2  | -0.05    |  | 0  | 0  | 0  | 0   |         |

|           |               |                                                                                 |     |     |     |      |         |    |    |     |     |        |  |
|-----------|---------------|---------------------------------------------------------------------------------|-----|-----|-----|------|---------|----|----|-----|-----|--------|--|
| 240120054 | Akr7a5        | aflatoxin B1 aldehyde reductase member 2                                        | 1   | 0   | 0   | 1    | -0.12   | 0  | 0  | 0   | 0   |        |  |
| 7709982   | Aip           | AH receptor-interacting protein                                                 | 0   | 0   | 0   | 0    |         | 0  | 0  | 2   | 2   | -0.17  |  |
| 61743961  | Ahnak         | AHNAK nucleoprotein isoform 1                                                   | 496 | ### | 904 | 2539 | 0.54*   | 20 | 68 | 31  | 119 | 0.64*# |  |
| 90403607  | Ahnak         | AHNAK nucleoprotein isoform 3                                                   | 0   | 0   | 0   | 0    |         | 0  | 2  | 0   | 2   | -0.07  |  |
| 31560394  | Akap8         | A-kinase anchor protein 8                                                       | 10  | 16  | 8   | 34   | 0.11    | 11 | 17 | 15  | 43  | 0.25*  |  |
| 70780373  | Akap8l        | A-kinase anchor protein 8-like                                                  | 0   | 0   | 0   | 0    |         | 1  | 1  | 4   | 6   | -1.80# |  |
| 125661048 | Akap9         | A-kinase anchor protein 9                                                       | 0   | 0   | 1   | 1    | -10.32# | 0  | 0  | 0   | 0   |        |  |
| 241982696 | Aaas          | aladin                                                                          | 12  | 11  | 10  | 33   | 0.04    | 5  | 25 | 8   | 38  | -0.03  |  |
| 21450213  | Aarsd1        | alanyl-tRNA editing protein Aarsd1                                              | 0   | 1   | 1   | 2    | 0.40    | 0  | 0  | 0   | 0   |        |  |
| 34610207  | Aars          | alanyl-tRNA synthetase, cytoplasmic                                             | 0   | 0   | 0   | 0    |         | 0  | 0  | 7   | 7   | -0.22  |  |
| 227430284 | 2810432D09Rik | alba-like protein C9orf23 homolog                                               | 2   | 1   | 3   | 6    | 0.06    | 0  | 0  | 0   | 0   |        |  |
| 10946870  | Akr1a4        | alcohol dehydrogenase [NADP+]                                                   | 1   | 0   | 0   | 1    | -0.30   | 0  | 1  | 5   | 6   | -0.42  |  |
| 83019564  | 1700055N04Rik | aldehyde dehydrogenase family 3 member B1 isoform 4                             | 0   | 0   | 0   | 0    |         | 0  | 1  | 0   | 1   | 0.01   |  |
| 6753036   | Aldh2         | aldehyde dehydrogenase, mitochondrial precursor                                 | 1   | 0   | 0   | 1    | -0.48   | 0  | 0  | 0   | 0   |        |  |
| 85719330  | Akr1c12       | aldo-keto reductase family 1, member C12                                        | 0   | 0   | 0   | 0    |         | 0  | 1  | 2   | 3   | -0.13  |  |
| 282398141 | Akr1c19       | aldo-keto reductase family 1, member C19                                        | 0   | 0   | 0   | 0    |         | 0  | 9  | 15  | 24  | -0.26  |  |
| 312922382 | Aldoart1      | aldolase 1 A retrogene 1                                                        | 0   | 0   | 0   | 0    |         | 0  | 1  | 0   | 1   | 10.07# |  |
| 160707894 | Akr1b3        | aldose reductase                                                                | 0   | 0   | 0   | 0    |         | 1  | 9  | 14  | 24  | -0.04  |  |
| 295444834 | Agps          | alkyldihydroxyacetonephosphate synthase, peroxisomal precursor                  | 19  | 21  | 11  | 51   | -0.11   | 1  | 5  | 3   | 9   | 0.16   |  |
| 21553105  | Aif1l         | allograft inflammatory factor 1-like                                            | 8   | 8   | 8   | 24   | 0.36    | 0  | 0  | 0   | 0   |        |  |
| 24528555  | Mettl11a      | alpha N-terminal protein methyltransferase 1A                                   | 4   | 5   | 4   | 13   | 0.08    | 0  | 1  | 1   | 2   | -0.04  |  |
| 19527202  | Alg9          | alpha-1,2-mannosyltransferase ALG9                                              | 0   | 1   | 0   | 1    | -0.67#  | 0  | 0  | 0   | 0   |        |  |
| 158711698 | Mgat1         | alpha-1,3-mannosyl-glycoprotein 2-beta-N-acetylglucosaminyltransferase          | 0   | 0   | 0   | 0    |         | 0  | 1  | 0   | 1   | 10.07# |  |
| 63999380  | Lrpap1        | alpha-2-macroglobulin receptor-associated protein precursor                     | 3   | 1   | 1   | 5    | 0.02    | 0  | 0  | 0   | 0   |        |  |
| 61097906  | Actn1         | alpha-actinin-1                                                                 | 63  | 56  | 54  | 173  | 0.06    | 77 | 90 | 162 | 329 | 0.10   |  |
| 157951643 | Actn2         | alpha-actinin-2                                                                 | 0   | 10  | 14  | 24   | 0.04    | 0  | 0  | 0   | 0   |        |  |
| 11230802  | Actn4         | alpha-actinin-4                                                                 | 54  | 57  | 64  | 175  | 0.16    | 56 | 58 | 89  | 203 | 0.11   |  |
| 156255171 | Add1          | alpha-adducin isoform 1                                                         | 9   | 0   | 0   | 9    | 0.74#   | 0  | 0  | 0   | 0   |        |  |
| 7304861   | Add1          | alpha-adducin isoform 2                                                         | 2   | 14  | 11  | 27   | 0.66#   | 1  | 0  | 0   | 1   | 1.81#  |  |
| 227330565 | Ctnnal1       | alpha-catulin                                                                   | 0   | 0   | 1   | 1    | -10.32# | 0  | 1  | 0   | 1   | 10.07# |  |
| 8392847   | Actr1a        | alpha-centractin                                                                | 8   | 10  | 8   | 26   | 0.19    | 1  | 8  | 8   | 17  | 0.14   |  |
| 6753530   | Cryab         | alpha-crystallin B chain                                                        | 0   | 0   | 0   | 0    |         | 0  | 0  | 1   | 1   | -0.35  |  |
| 71061466  | Ensa          | alpha-endosulfine isoform b                                                     | 2   | 0   | 0   | 2    | -0.03   | 0  | 0  | 0   | 0   |        |  |
| 309265192 | LOC100503183  | alpha-enolase-like isoform 10                                                   | 2   | 0   | 0   | 2    | -0.46   | 0  | 0  | 0   | 0   |        |  |
| 309265194 | LOC100503183  | alpha-enolase-like isoform 3                                                    | 0   | 0   | 0   | 0    |         | 0  | 2  | 56  | 58  | -0.23  |  |
| 15628025  | Tcfcp2        | alpha-globin transcription factor CP2                                           | 7   | 12  | 5   | 24   | -0.13   | 0  | 2  | 2   | 4   | 0.00   |  |
| 61098162  | Alkbh2        | alpha-ketoglutarate-dependent dioxygenase alkB homolog 2                        | 3   | 6   | 3   | 12   | -0.09   | 0  | 0  | 0   | 0   |        |  |
| 168693635 | Naga          | alpha-N-acetylgalactosaminidase precursor                                       | 65  | 103 | 90  | 258  | 0.05    | 18 | 48 | 55  | 121 | 0.40   |  |
| 254910995 | Naglu         | alpha-N-acetylglucosaminidase                                                   | 2   | 6   | 2   | 10   | -0.08   | 1  | 2  | 5   | 8   | 0.19   |  |
| 31982526  | Parva         | alpha-parvin                                                                    | 7   | 9   | 8   | 24   | -0.01   | 1  | 5  | 7   | 13  | -0.96# |  |
| 13385392  | Napa          | alpha-soluble NSF attachment protein                                            | 8   | 7   | 8   | 23   | -0.12   | 0  | 1  | 0   | 1   | 0.39   |  |
| 91598586  | Txlna         | alpha-taxilin                                                                   | 0   | 3   | 5   | 8    | 0.23    | 0  | 0  | 0   | 0   |        |  |
| 126012517 | Aimp1         | aminoacyl tRNA synthase complex-interacting multifunctional protein 1           | 0   | 0   | 1   | 1    | -0.22   | 0  | 0  | 0   | 0   |        |  |
| 288541337 | Aimp2         | aminoacyl tRNA synthase complex-interacting multifunctional protein 2 isoform 1 | 1   | 0   | 0   | 1    | -0.78#  | 0  | 0  | 0   | 0   |        |  |
| 62000670  | Amt           | aminomethyltransferase, mitochondrial precursor                                 | 3   | 10  | 4   | 17   | -0.06   | 0  | 0  | 0   | 0   |        |  |
| 227499234 | Rnpep         | aminopeptidase B isoform 2                                                      | 0   | 0   | 0   | 0    |         | 0  | 0  | 1   | 1   | 0.15   |  |

|           |         |                                                                   |    |     |     |     |       |     |     |     |     |     |       |     |
|-----------|---------|-------------------------------------------------------------------|----|-----|-----|-----|-------|-----|-----|-----|-----|-----|-------|-----|
| 229092834 | Rhcg    | ammonium transporter Rh type C                                    | 0  | 0   | 0   | 0   |       |     | 1   | 0   | 0   | 1   | 0.49  | #   |
| 47271504  | App     | amyloid beta A4 protein isoform 2 precursor                       | 2  | 0   | 2   | 4   | -0.59 | #   | 0   | 0   | 0   | 0   |       |     |
| 31982674  | Zfand1  | AN1-type zinc finger protein 1                                    | 1  | 0   | 2   | 3   | 1.02  | #   | 0   | 0   | 0   | 0   |       |     |
| 228008323 | Anapc1  | anaphase-promoting complex subunit 1                              | 2  | 5   | 1   | 8   | 0.30  |     | 0   | 0   | 0   | 0   |       |     |
| 35900980  | Anapc10 | anaphase-promoting complex subunit 10                             | 1  | 2   | 0   | 3   | -0.07 |     | 0   | 0   | 0   | 0   |       |     |
| 84039696  | Anapc11 | anaphase-promoting complex subunit 11                             | 0  | 2   | 1   | 3   | 0.06  |     | 0   | 0   | 0   | 0   |       |     |
| 13384936  | Anapc16 | anaphase-promoting complex subunit 16                             | 3  | 2   | 0   | 5   | 0.09  |     | 0   | 0   | 0   | 0   |       |     |
| 109809751 | Anapc5  | anaphase-promoting complex subunit 5 isoform a                    | 0  | 4   | 0   | 4   | 0.14  |     | 0   | 0   | 0   | 0   |       |     |
| 109809753 | Anapc5  | anaphase-promoting complex subunit 5 isoform b                    | 0  | 0   | 3   | 3   | 0.38  |     | 0   | 0   | 0   | 0   |       |     |
| 254281282 | Anapc7  | anaphase-promoting complex subunit 7                              | 8  | 7   | 2   | 17  | -0.01 |     | 0   | 0   | 0   | 0   |       |     |
| 21314828  | Cdc26   | anaphase-promoting complex subunit CDC26                          | 3  | 1   | 2   | 6   | 0.37  |     | 0   | 0   | 0   | 0   |       |     |
| 261862329 | Rai14   | ankycorbin                                                        | 1  | 5   | 3   | 9   | 0.58  | #   | 0   | 0   | 0   | 0   |       |     |
| 116256491 | Ank3    | ankyrin 3, epithelial isoform a                                   | 5  | 8   | 0   | 13  | 0.42  |     | 0   | 0   | 0   | 0   |       |     |
| 116256499 | Ank3    | ankyrin 3, epithelial isoform i                                   | 0  | 0   | 5   | 5   | 0.28  |     | 0   | 0   | 0   | 0   |       |     |
| 124487033 | Ankrd11 | ankyrin repeat domain 11                                          | 0  | 1   | 0   | 1   | 0.36  |     | 0   | 0   | 0   | 0   |       |     |
| 125628652 | Ankrd36 | ankyrin repeat domain 36                                          | 0  | 0   | 2   | 2   | -4.72 | #   | 0   | 0   | 0   | 0   |       |     |
| 124517663 | Anxa1   | annexin A1                                                        | 44 | 69  | 59  | 172 | -0.22 |     | 6   | 50  | 106 | 162 | -0.09 |     |
| 160707921 | Anxa11  | annexin A11                                                       | 5  | 12  | 2   | 19  | 0.03  |     | 0   | 1   | 2   | 3   | -0.08 |     |
| 6996913   | Anxa2   | annexin A2                                                        | 75 | 121 | 100 | 296 | -0.15 |     | 66  | 90  | 86  | 242 | -0.13 | *   |
| 160707925 | Anxa3   | annexin A3                                                        | 8  | 3   | 5   | 16  | -0.29 |     | 0   | 0   | 0   | 0   |       |     |
| 161016799 | Anxa4   | annexin A4                                                        | 25 | 23  | 26  | 74  | -0.22 |     | 4   | 12  | 34  | 50  | -0.19 |     |
| 6753060   | Anxa5   | annexin A5                                                        | 18 | 12  | 15  | 45  | -0.24 |     | 3   | 13  | 41  | 57  | -0.03 |     |
| 158966670 | Anxa6   | annexin A6 isoform b                                              | 1  | 2   | 0   | 3   | 0.46  |     | 0   | 1   | 7   | 8   | -5.02 | #   |
| 160707956 | Anxa7   | annexin A7                                                        | 0  | 2   | 2   | 4   | -2.05 | #   | 0   | 0   | 1   | 1   | -0.13 |     |
| 145864475 | Anxa9   | annexin A9                                                        | 53 | 42  | 38  | 133 | 0.70  | *,# | 15  | 43  | 27  | 85  | 0.80  | *,# |
| 169234624 | Mki67   | antigen KI-67                                                     | 57 | 46  | 39  | 142 | -0.19 | *   | 33  | 40  | 146 | 219 | -0.24 |     |
| 88853578  | Ap1b1   | AP-1 complex subunit beta-1                                       | 7  | 9   | 12  | 28  | 0.19  |     | 0   | 0   | 4   | 4   | -0.11 |     |
| 56744242  | Ap1g1   | AP-1 complex subunit gamma-1                                      | 2  | 0   | 0   | 2   | -0.02 |     | 0   | 0   | 1   | 1   | -0.13 |     |
| 160333508 | Ap1m2   | AP-1 complex subunit mu-2 isoform 2                               | 1  | 1   | 1   | 3   | 0.12  |     | 0   | 2   | 5   | 7   | -0.17 |     |
| 6671559   | Ap1s1   | AP-1 complex subunit sigma-1A                                     | 3  | 2   | 4   | 9   | 0.02  |     | 0   | 0   | 0   | 0   |       |     |
| 116256510 | Ap2a1   | AP-2 complex subunit alpha-1 isoform b                            | 6  | 9   | 4   | 19  | 0.61  | #   | 0   | 4   | 4   | 8   | 0.11  |     |
| 163644277 | Ap2a2   | AP-2 complex subunit alpha-2                                      | 4  | 22  | 7   | 33  | 0.54  | *   | 0   | 6   | 8   | 14  | -0.01 |     |
| 21313640  | Ap2b1   | AP-2 complex subunit beta isoform b                               | 15 | 35  | 22  | 72  | 0.24  |     | 3   | 22  | 31  | 56  | 0.20  | *   |
| 6753074   | Ap2m1   | AP-2 complex subunit mu                                           | 8  | 15  | 12  | 35  | 0.35  | *   | 0   | 11  | 5   | 16  | 0.28  |     |
| 161086984 | Ap2s1   | AP-2 complex subunit sigma                                        | 7  | 0   | 2   | 9   | 0.32  | *   | 0   | 0   | 0   | 0   |       |     |
| 163310776 | Ap3b1   | AP-3 complex subunit beta-1                                       | 1  | 1   | 0   | 2   | -0.24 |     | 0   | 0   | 0   | 0   |       |     |
| 254281313 | Ap3m1   | AP-3 complex subunit mu-1                                         | 4  | 6   | 3   | 13  | -0.44 |     | 0   | 0   | 0   | 0   |       |     |
| 6753078   | Ap3s1   | AP-3 complex subunit sigma-1                                      | 0  | 2   | 1   | 3   | -0.22 | *   | 0   | 0   | 0   | 0   |       |     |
| 160707971 | Ap3s2   | AP-3 complex subunit sigma-2                                      | 1  | 3   | 1   | 5   | -0.35 | *   | 0   | 0   | 0   | 0   |       |     |
| 21553309  | Apoa1bp | apolipoprotein A-I-binding protein precursor                      | 8  | 4   | 8   | 20  | -0.13 |     | 0   | 0   | 0   | 0   |       |     |
| 313569763 | ApoO    | apolipoprotein O isoform 3                                        | 4  | 0   | 2   | 6   | 0.08  |     | 0   | 0   | 0   | 0   |       |     |
| 13386062  | Apool   | apolipoprotein O-like precursor                                   | 5  | 2   | 0   | 7   | 0.19  |     | 4   | 2   | 6   | 12  | 0.49  | #   |
| 94158994  | Api5    | apoptosis inhibitor 5                                             | 94 | 94  | 69  | 257 | 0.02  |     | 12  | 40  | 20  | 72  | 0.02  |     |
| 6755004   | Aifm1   | apoptosis-inducing factor 1, mitochondrial precursor              | 25 | 11  | 5   | 41  | -0.05 |     | 2   | 12  | 7   | 21  | 0.19  |     |
| 85861162  | Aifm2   | apoptosis-inducing factor 2 isoform 2                             | 0  | 0   | 0   | 0   |       |     | 0   | 2   | 2   | 4   | 1.93  | #   |
| 146231985 | Acin1   | apoptotic chromatin condensation inducer in the nucleus isoform 2 | 0  | 0   | 0   | 0   |       |     | 0   | 125 | 138 | 263 | 0.22  |     |
| 194394195 | Acin1   | apoptotic chromatin condensation inducer in the nucleus isoform 3 | 4  | 15  | 14  | 33  | -0.22 |     | 0   | 10  | 31  | 41  | -0.06 |     |
| 194394197 | Acin1   | apoptotic chromatin condensation inducer in the nucleus isoform 4 | 57 | 65  | 68  | 190 | 0.22  |     | 217 | 105 | 123 | 445 | 0.14  | *   |
| 31541860  | Ap1f    | aprataxin and PNK-like factor isoform 2                           | 0  | 1   | 0   | 1   | -0.55 |     | 0   | 0   | 0   | 0   |       |     |

|           |              |                                                         |    |    |    |     |       |   |     |     |     |       |       |
|-----------|--------------|---------------------------------------------------------|----|----|----|-----|-------|---|-----|-----|-----|-------|-------|
| 33563260  | Agfg1        | arf-GAP domain and FG repeats-containing protein 1      | 1  | 2  | 2  | 5   | -0.35 | 0 | 0   | 0   | 0   |       |       |
| 134152669 | Arglu1       | arginine and glutamate-rich protein 1                   | 0  | 3  | 0  | 3   | -0.05 | 0 | 1   | 0   | 1   | -0.06 |       |
| 53988372  | Rsrc2        | arginine/serine-rich coiled-coil protein 2 isoform 2    | 0  | 11 | 2  | 13  | 0.20  | 0 | 0   | 6   | 6   | 0.19  |       |
| 224967104 | Srsf6        | arginine/serine-rich splicing factor 6                  | 5  | 6  | 4  | 15  | -0.05 | 2 | 16  | 9   | 27  | 0.05  |       |
| 262118273 | Rars         | arginyl-tRNA synthetase, cytoplasmic                    | 0  | 2  | 0  | 2   | 0.31  | 0 | 2   | 4   | 6   | 0.03  |       |
| 21312676  | Armc1        | armadillo repeat-containing protein 1                   | 1  | 0  | 0  | 1   | -0.06 | 0 | 0   | 0   | 0   |       |       |
| 13385536  | Armc10       | armadillo repeat-containing protein 10                  | 7  | 8  | 11 | 26  | 0.15  | 6 | 9   | 9   | 24  | 0.06  |       |
| 67972647  | Arsa         | arylsulfatase A precursor                               | 0  | 0  | 1  | 1   | 0.13  | 0 | 0   | 0   | 0   |       |       |
| 19527038  | AI597479     | ashwin                                                  | 0  | 10 | 0  | 10  | 0.32  | 0 | 0   | 0   | 0   |       |       |
| 33469123  | Asns         | asparagine synthetase [glutamine-hydrolyzing]           | 0  | 0  | 0  | 0   |       | 0 | 0   | 3   | 3   | 0.72  | #     |
| 219275596 | Nars         | asparaginyl-tRNA synthetase, cytoplasmic isoform 2      | 6  | 8  | 8  | 22  | -0.02 | 0 | 1   | 5   | 6   | 0.02  |       |
| 6754036   | Got2         | aspartate aminotransferase, mitochondrial               | 34 | 19 | 14 | 67  | -0.19 | * | 14  | 11  | 5   | 30    | -0.11 |
| 295390633 | Asph         | aspartyl/asparaginyl beta-hydroxylase isoform 10        | 9  | 4  | 4  | 17  | -0.42 | * | 0   | 7   | 7   | 14    | -0.39 |
| 295390525 | Asph         | aspartyl/asparaginyl beta-hydroxylase isoform 3         | 23 | 11 | 16 | 50  | -0.41 | * | 26  | 8   | 6   | 40    | -0.29 |
| 211065507 | Dars         | aspartyl-tRNA synthetase, cytoplasmic isoform 1         | 10 | 12 | 13 | 35  | 0.04  |   | 0   | 20  | 17  | 37    | -0.08 |
| 21426847  | Pea15a       | astrocytic phosphoprotein PEA-15 isoform 2              | 1  | 0  | 0  | 1   | -0.92 | # | 0   | 0   | 2   | 2     | -0.39 |
| 145553997 | Arid1b       | AT rich interactive domain 1B (Swi1 like)               | 16 | 30 | 18 | 64  | 0.48  | * | 0   | 7   | 0   | 7     | 0.25  |
| 262231796 | Arid2        | AT rich interactive domain 2 (ARID, RFX-like)           | 20 | 36 | 17 | 73  | 0.06  |   | 0   | 0   | 0   | 0     |       |
| 83649709  | Atxn10       | ataxin-10                                               | 0  | 0  | 0  | 0   |       |   | 0   | 0   | 3   | 3     | -0.06 |
| 124487221 | Samd1        | atherin                                                 | 4  | 2  | 0  | 6   | -0.18 |   | 0   | 0   | 0   | 0     |       |
| 254826716 | Atl3         | atlastin-3 isoform 1                                    | 7  | 0  | 0  | 7   | 0.24  |   | 0   | 2   | 2   | 4     | -0.57 |
| 167716841 | ATP8         | ATP synthase F0 subunit 8                               | 2  | 1  | 2  | 5   | -0.24 | * | 3   | 0   | 1   | 4     | -0.34 |
| 238776839 | Atpaf2       | ATP synthase mitochondrial F1 complex assembly factor 2 | 3  | 0  | 0  | 3   | -0.42 |   | 0   | 0   | 0   | 0     |       |
| 6680748   | Atp5a1       | ATP synthase subunit alpha, mitochondrial precursor     | 51 | 16 | 29 | 96  | -0.28 | * | 163 | 24  | 22  | 209   | -0.29 |
| 78214312  | Atp5f1       | ATP synthase subunit b, mitochondrial precursor         | 7  | 1  | 1  | 9   | -0.30 |   | 18  | 3   | 0   | 21    | -0.38 |
| 31980648  | Atp5b        | ATP synthase subunit beta, mitochondrial precursor      | 78 | 32 | 34 | 144 | -0.25 |   | 306 | 38  | 44  | 388   | -0.26 |
| 21313679  | Atp5h        | ATP synthase subunit d, mitochondrial                   | 14 | 7  | 9  | 30  | -0.13 |   | 27  | 6   | 5   | 38    | -0.31 |
| 166851828 | Atp5d        | ATP synthase subunit delta, mitochondrial precursor     | 3  | 5  | 5  | 13  | -0.22 | * | 16  | 0   | 6   | 22    | -0.17 |
| 83715998  | Atp5k        | ATP synthase subunit e, mitochondrial                   | 4  | 0  | 3  | 7   | 0.12  |   | 11  | 0   | 0   | 11    | -0.40 |
| 149253631 | Gm10221      | ATP synthase subunit g, mitochondrial-like              | 4  | 3  | 2  | 9   | -0.21 |   | 1   | 0   | 0   | 1     | -0.20 |
| 163838648 | Atp5c1       | ATP synthase subunit gamma, mitochondrial isoform b     | 4  | 3  | 2  | 9   | -0.39 |   | 8   | 4   | 4   | 16    | -0.23 |
| 149251053 | LOC100047429 | ATP synthase subunit O, mitochondrial-like              | 17 | 13 | 11 | 41  | -0.39 | * | 47  | 9   | 9   | 65    | -0.32 |
| 7949005   | Atp5j        | ATP synthase-coupling factor 6, mitochondrial precursor | 5  | 0  | 0  | 5   | -0.37 |   | 2   | 0   | 0   | 2     | -0.25 |
| 12025542  | Asna1        | ATPase Asna1                                            | 1  | 0  | 0  | 1   | -0.14 |   | 0   | 0   | 1   | 1     | 0.03  |
| 31560168  | Atad1        | ATPase family AAA domain-containing protein 1           | 0  | 0  | 0  | 0   |       |   | 0   | 0   | 1   | 1     | 0.67  |
| 91199557  | Atad2        | ATPase family AAA domain-containing protein 2           | 0  | 0  | 0  | 0   |       |   | 91  | 174 | 319 | 584   | -0.06 |
| 153791220 | Atad2b       | ATPase family AAA domain-containing protein 2B          | 0  | 0  | 0  | 0   |       |   | 31  | 65  | 137 | 233   | -0.02 |
| 239985513 | Atad3a       | ATPase family AAA domain-containing protein 3           | 0  | 0  | 0  | 0   |       |   | 0   | 2   | 0   | 2     | 0.09  |
| 31982864  | Atpif1       | ATPase inhibitor, mitochondrial precursor               | 1  | 3  | 1  | 5   | -0.10 |   | 0   | 1   | 0   | 1     | -0.04 |



|           |          |                                                                                   |     |     |     |     |       |   |     |     |     |      |       |   |
|-----------|----------|-----------------------------------------------------------------------------------|-----|-----|-----|-----|-------|---|-----|-----|-----|------|-------|---|
| 116292744 | Abca13   | ATP-binding cassette sub-family A member 13                                       | 0   | 0   | 0   | 0   |       |   | 0   | 1   | 0   | 1    | 5.22  | # |
| 60218877  | Abcd3    | ATP-binding cassette sub-family D member 3                                        | 10  | 9   | 5   | 24  | 0.08  |   | 64  | 49  | 26  | 139  | 0.17  |   |
| 114205431 | Abce1    | ATP-binding cassette sub-family E member 1                                        | 3   | 5   | 0   | 8   | -0.04 |   | 0   | 2   | 5   | 7    | 0.09  |   |
| 39930335  | Abcf1    | ATP-binding cassette sub-family F member 1                                        | 6   | 3   | 5   | 14  | -0.13 |   | 0   | 1   | 1   | 2    | 0.14  |   |
| 299473734 | Abcf2    | ATP-binding cassette sub-family F member 2 isoform 2                              | 4   | 5   | 3   | 12  | 0.24  |   | 0   | 0   | 1   | 1    | 0.08  |   |
| 29293809  | Acly     | ATP-citrate synthase isoform 2                                                    | 0   | 0   | 0   | 0   |       |   | 0   | 0   | 5   | 5    | -0.35 |   |
| 113205069 | Clpx     | ATP-dependent Clp protease ATP-binding subunit clpX-like, mitochondrial isoform 2 | 0   | 0   | 0   | 0   |       |   | 0   | 0   | 2   | 2    | -0.10 |   |
| 110625690 | Recql    | ATP-dependent DNA helicase Q1 isoform 1                                           | 0   | 1   | 0   | 1   | 0.15  |   | 0   | 0   | 0   | 0    |       |   |
| 150456419 | Dhx9     | ATP-dependent RNA helicase A                                                      | 224 | 304 | 224 | 752 | -0.14 |   | 845 | ### | ### | 3442 | -0.06 | * |
| 19527256  | Ddx1     | ATP-dependent RNA helicase DDX1                                                   | 15  | 31  | 12  | 58  | 0.03  |   | 2   | 1   | 9   | 12   | -0.17 |   |
| 31981163  | Ddx18    | ATP-dependent RNA helicase DDX18                                                  | 38  | 47  | 26  | 111 | 0.07  |   | 34  | 55  | 68  | 157  | 0.16  |   |
| 170932536 | Ddx19a   | ATP-dependent RNA helicase DDX19A                                                 | 7   | 10  | 14  | 31  | -0.07 |   | 0   | 4   | 0   | 4    | -0.33 |   |
| 26986593  | Ddx19b   | ATP-dependent RNA helicase DDX19B isoform 2                                       | 0   | 0   | 8   | 8   | -0.13 |   | 0   | 0   | 0   | 0    |       |   |
| 299890779 | Ddx19b   | ATP-dependent RNA helicase DDX19B isoform 3                                       | 0   | 0   | 0   | 0   |       |   | 0   | 0   | 3   | 3    | 0.05  |   |
| 226958385 | Ddx24    | ATP-dependent RNA helicase DDX24 isoform 1                                        | 0   | 0   | 0   | 0   |       |   | 0   | 19  | 33  | 52   | 0.27  |   |
| 34328253  | Ddx24    | ATP-dependent RNA helicase DDX24 isoform 2                                        | 1   | 7   | 4   | 12  | -0.20 |   | 1   | 0   | 1   | 2    | 0.48  | # |
| 38372907  | Ddx39    | ATP-dependent RNA helicase DDX39A                                                 | 34  | 52  | 64  | 150 | 0.12  |   | 73  | 112 | 112 | 297  | 0.07  |   |
| 6753620   | Ddx3x    | ATP-dependent RNA helicase DDX3X                                                  | 26  | 38  | 28  | 92  | -0.08 |   | 64  | 79  | 136 | 279  | 0.02  |   |
| 25141235  | Ddx3y    | ATP-dependent RNA helicase DDX3Y                                                  | 5   | 3   | 5   | 13  | -0.14 |   | 0   | 16  | 25  | 41   | 0.01  |   |
| 157838001 | Ddx42    | ATP-dependent RNA helicase DDX42                                                  | 22  | 40  | 26  | 88  | 0.26  | * | 0   | 9   | 6   | 15   | 0.61  | # |
| 16716475  | Ddx50    | ATP-dependent RNA helicase DDX50                                                  | 1   | 5   | 2   | 8   | -0.07 |   | 3   | 26  | 26  | 55   | 0.15  |   |
| 40538825  | Ddx51    | ATP-dependent RNA helicase DDX51                                                  | 6   | 9   | 6   | 21  | 0.05  |   | 0   | 11  | 14  | 25   | -0.09 |   |
| 28076989  | Ddx54    | ATP-dependent RNA helicase DDX54                                                  | 0   | 0   | 0   | 0   |       |   | 0   | 10  | 31  | 41   | 0.07  |   |
| 56699440  | Dhx8     | ATP-dependent RNA helicase DHX8                                                   | 0   | 13  | 15  | 28  | 0.16  |   | 0   | 14  | 5   | 19   | 0.18  |   |
| 31088872  | Supv311  | ATP-dependent RNA helicase SUPV3L1, mitochondrial precursor                       | 3   | 14  | 10  | 27  | -0.16 | * | 0   | 1   | 2   | 3    | -0.54 | # |
| 124249109 | Arid1a   | AT-rich interactive domain-containing protein 1A                                  | 38  | 67  | 57  | 162 | 0.50  | * | 0   | 11  | 9   | 20   | 0.39  |   |
| 124487105 | Arid4a   | AT-rich interactive domain-containing protein 4A                                  | 3   | 2   | 2   | 7   | 0.22  |   | 0   | 0   | 0   | 0    |       |   |
| 37694070  | Arid4b   | AT-rich interactive domain-containing protein 4B isoform 2                        | 2   | 3   | 4   | 9   | -0.04 |   | 0   | 0   | 0   | 0    |       |   |
| 59859890  | Birc5    | baculoviral IAP repeat-containing protein 5 isoform 3                             | 0   | 0   | 0   | 0   |       |   | 0   | 3   | 0   | 3    | -0.31 |   |
| 284507286 | Bag1     | BAG family molecular chaperone regulator 1 isoform 1S                             | 0   | 0   | 1   | 1   | 0.22  |   | 0   | 0   | 0   | 0    |       |   |
| 21703784  | Bag2     | BAG family molecular chaperone regulator 2                                        | 6   | 10  | 5   | 21  | 0.18  |   | 7   | 20  | 9   | 36   | 0.11  |   |
| 54873604  | Epb4.111 | band 4.1-like protein 1 isoform b                                                 | 0   | 0   | 1   | 1   | -1.15 | # | 0   | 0   | 1   | 1    | -0.02 |   |
| 157041260 | Epb4.112 | band 4.1-like protein 2                                                           | 0   | 0   | 0   | 0   |       |   | 0   | 0   | 1   | 1    | -0.86 | # |
| 164663872 | Epb4.115 | band 4.1-like protein 5 isoform 2                                                 | 2   | 3   | 2   | 7   | -0.30 |   | 40  | 62  | 66  | 168  | 0.07  |   |
| 46519149  | Heatr1   | BAP28 protein                                                                     | 18  | 15  | 31  | 64  | -0.47 |   | 69  | 240 | 386 | 695  | 0.00  |   |
| 6753178   | Banf1    | barrier-to-autointegration factor                                                 | 8   | 8   | 15  | 31  | 0.10  |   | 139 | 30  | 16  | 185  | 0.17  |   |
| 10048460  | Bcam     | basal cell adhesion molecule                                                      | 0   | 0   | 0   | 0   |       |   | 0   | 0   | 3   | 3    | -0.22 |   |
| 183979966 | Hspg2    | basement membrane-specific heparan sulfate proteoglycan core protein              | 0   | 0   | 0   | 0   |       |   | 1   | 26  | 98  | 125  | -3.31 | # |
| 31981160  | Bzw2     | basic leucine zipper and W2 domain-containing protein 2                           | 1   | 1   | 1   | 3   | 0.03  |   | 0   | 0   | 1   | 1    | -0.33 |   |

|           |          |                                                                                    |    |    |    |     |         |  |  |    |    |     |     |         |
|-----------|----------|------------------------------------------------------------------------------------|----|----|----|-----|---------|--|--|----|----|-----|-----|---------|
| 283945627 | Tmbim6   | bax inhibitor 1                                                                    | 0  | 0  | 0  | 0   |         |  |  | 3  | 1  | 1   | 5   | -0.41 * |
| 22296593  | Bcl7a    | B-cell CLL/lymphoma 7 protein family member A                                      | 2  | 7  | 1  | 10  | 0.31    |  |  | 1  | 4  | 1   | 6   | 0.41 *  |
| 159032025 | Bcl7b    | B-cell CLL/lymphoma 7 protein family member B                                      | 0  | 1  | 0  | 1   | -0.01   |  |  | 0  | 0  | 0   | 0   |         |
| 6753176   | Bcl7c    | B-cell CLL/lymphoma 7 protein family member C                                      | 1  | 3  | 2  | 6   | 0.16    |  |  | 0  | 1  | 4   | 5   | 0.28    |
| 91206400  | Bcl9l    | B-cell CLL/lymphoma 9-like protein                                                 | 1  | 0  | 1  | 2   | 5.26 #  |  |  | 0  | 0  | 0   | 0   |         |
| 31981310  | Bcap31   | B-cell receptor-associated protein 31                                              | 10 | 7  | 1  | 18  | -0.21   |  |  | 30 | 13 | 13  | 56  | -0.22 * |
| 111955302 | Bak1     | bcl-2 homologous antagonist/killer                                                 | 3  | 1  | 0  | 4   | 0.19    |  |  | 5  | 7  | 2   | 14  | 0.17    |
| 24496776  | Bclaf1   | bcl-2-associated transcription factor 1 isoform 2                                  | 0  | 0  | 0  | 0   |         |  |  | 0  | 10 | 0   | 10  | 0.47 #  |
| 70906449  | Bclaf1   | bcl-2-associated transcription factor 1 isoform 3                                  | 2  | 16 | 10 | 28  | 0.18    |  |  | 5  | 0  | 12  | 17  | -0.05   |
| 7949082   | Bok      | bcl-2-related ovarian killer protein                                               | 0  | 1  | 0  | 1   | -0.05   |  |  | 0  | 0  | 0   | 0   |         |
| 39841055  | Bend3    | BEN domain-containing protein 3                                                    | 0  | 0  | 1  | 1   | 0.79 #  |  |  | 0  | 0  | 0   | 0   |         |
| 40254314  | Bend6    | BEN domain-containing protein 6                                                    | 0  | 0  | 1  | 1   | 4.44 #  |  |  | 0  | 0  | 0   | 0   |         |
| 31981890  | B2m      | beta-2-microglobulin precursor                                                     | 0  | 0  | 1  | 1   | -1.21 # |  |  | 0  | 0  | 0   | 0   |         |
| 6678059   | Sntb2    | beta-2-syntrophin                                                                  | 1  | 1  | 0  | 2   | 0.26    |  |  | 0  | 3  | 2   | 5   | 0.02    |
| 30425250  | Actb2    | beta-actin-like protein 2                                                          | 21 | 50 | 52 | 123 | 0.37    |  |  | 68 | 46 | 66  | 180 | 0.34    |
| 254540032 | Ctnnb1   | beta-catenin-like protein 1                                                        | 21 | 32 | 12 | 65  | 0.21    |  |  | 9  | 10 | 3   | 22  | 0.05    |
| 6680812   | Btc      | betacellulin preproprotein                                                         | 2  | 0  | 0  | 2   | 0.34    |  |  | 0  | 0  | 0   | 0   |         |
| 6679651   | Eno3     | beta-enolase isoform 1                                                             | 6  | 8  | 13 | 27  | -0.03   |  |  | 95 | 60 | 147 | 302 | -0.13   |
| 6753190   | Glb1     | beta-galactosidase precursor                                                       | 1  | 0  | 0  | 1   | 0.11    |  |  | 0  | 0  | 0   | 0   |         |
| 67514549  | Hexa     | beta-hexosaminidase subunit alpha precursor                                        | 3  | 3  | 4  | 10  | 0.24    |  |  | 0  | 0  | 0   | 0   |         |
| 6754186   | Hexb     | beta-hexosaminidase subunit beta precursor                                         | 14 | 15 | 11 | 40  | 0.12    |  |  | 0  | 4  | 4   | 8   | 0.10    |
| 158533990 | Manba    | beta-mannosidase precursor                                                         | 28 | 43 | 46 | 117 | -0.01   |  |  | 0  | 47 | 43  | 90  | 0.01    |
| 319918850 | Papss2   | bifunctional 3'-phosphoadenosine 5'-phosphosulfate synthase 2 isoform 2            | 0  | 0  | 0  | 0   |         |  |  | 0  | 0  | 1   | 1   | -0.15   |
| 82617575  | Eprs     | bifunctional aminoacyl-tRNA synthetase                                             | 0  | 0  | 2  | 2   | -0.11   |  |  | 0  | 0  | 5   | 5   | -0.33   |
| 27229125  | Coasy    | bifunctional coenzyme A synthase                                                   | 0  | 0  | 0  | 0   |         |  |  | 0  | 0  | 1   | 1   | -0.02   |
| 6678952   | Mthfd2   | bifunctional methylenetetrahydrofolate dehydrogenase/cyclohydrolase, mitochondrial | 10 | 15 | 19 | 44  | -0.02   |  |  | 0  | 0  | 1   | 1   | 0.66 #  |
| 118601009 | Pnkp     | bifunctional polynucleotide phosphatase/kinase                                     | 7  | 12 | 10 | 29  | 0.21    |  |  | 0  | 0  | 2   | 2   | 1.54 #  |
| 227908823 | Atic     | bifunctional purine biosynthesis protein PURH                                      | 0  | 0  | 0  | 0   |         |  |  | 0  | 0  | 2   | 2   | -0.58 # |
| 31980697  | Bloc1s1  | biogenesis of lysosome-related organelles complex 1 subunit 1                      | 1  | 1  | 0  | 2   | -0.22   |  |  | 0  | 0  | 0   | 0   |         |
| 124487265 | Bod1l    | biorientation of chromosomes in cell division 1-like                               | 12 | 98 | 56 | 166 | 0.38 *  |  |  | 0  | 0  | 0   | 0   |         |
| 58037151  | Bola1    | bolA-like protein 1                                                                | 7  | 1  | 1  | 9   | -0.02   |  |  | 0  | 0  | 0   | 0   |         |
| 30424938  | Bola3    | bolA-like protein 3                                                                | 0  | 0  | 1  | 1   | -0.38   |  |  | 0  | 0  | 0   | 0   |         |
| 31982487  | Bmp7     | bone morphogenetic protein 7 precursor                                             | 0  | 0  | 1  | 1   | -0.09   |  |  | 0  | 0  | 0   | 0   |         |
| 227116268 | Cdca8    | borealin                                                                           | 0  | 0  | 0  | 0   |         |  |  | 0  | 2  | 7   | 9   | -0.09   |
| 45598372  | Basp1    | brain acid soluble protein 1                                                       | 17 | 28 | 14 | 59  | -0.14   |  |  | 24 | 9  | 21  | 54  | 0.15    |
| 83642836  | Baiap2   | brain-specific angiogenesis inhibitor 1-associated protein 2 isoform b             | 16 | 50 | 21 | 87  | -0.16   |  |  | 0  | 3  | 0   | 3   | -0.25   |
| 83649713  | Baiap2   | brain-specific angiogenesis inhibitor 1-associated protein 2 isoform c             | 1  | 0  | 0  | 1   | 0.30    |  |  | 0  | 0  | 0   | 0   |         |
| 21313234  | Baiap2l1 | brain-specific angiogenesis inhibitor 1-associated protein 2-like protein 1        | 0  | 1  | 0  | 1   | 1.15 #  |  |  | 0  | 1  | 0   | 1   | 1.22 #  |
| 33859514  | Bcat2    | branched-chain-amino-acid aminotransferase, mitochondrial precursor                | 1  | 0  | 0  | 1   | -0.27   |  |  | 0  | 0  | 0   | 0   |         |
| 41281945  | Bre      | BRCA1-A complex subunit BRE isoform II                                             | 1  | 0  | 1  | 2   | -0.10   |  |  | 0  | 0  | 2   | 2   | 0.16    |

|           |          |                                                                                          |    |    |    |     |         |  |    |    |    |     |         |
|-----------|----------|------------------------------------------------------------------------------------------|----|----|----|-----|---------|--|----|----|----|-----|---------|
| 21617851  | Bre      | BRCA1-A complex subunit BRE isoform V                                                    | 0  | 2  | 0  | 2   | 0.05    |  | 0  | 0  | 0  | 0   |         |
| 19527392  | Brms1    | breast cancer metastasis-suppressor 1 homolog                                            | 3  | 3  | 1  | 7   | 0.10    |  | 0  | 1  | 0  | 1   | -0.39   |
| 83649717  | Brms1l   | breast cancer metastasis-suppressor 1-like protein                                       | 3  | 4  | 3  | 10  | 0.27    |  | 0  | 1  | 0  | 1   | 0.08    |
| 58037467  | Bri3bp   | BRI3-binding protein                                                                     | 11 | 9  | 9  | 29  | -0.33 * |  | 3  | 8  | 7  | 18  | -0.18   |
| 10946638  | Bin3     | bridging integrator 3                                                                    | 1  | 1  | 0  | 2   | -0.16   |  | 0  | 2  | 1  | 3   | -0.04   |
| 189339272 | Baz1a    | bromodomain adjacent to zinc finger domain protein 1A                                    | 33 | 45 | 23 | 101 | -0.04   |  | 1  | 16 | 29 | 46  | -0.05   |
| 114205435 | Baz2a    | bromodomain adjacent to zinc finger domain protein 2A                                    | 4  | 5  | 6  | 15  | 0.54    |  | 25 | 39 | 63 | 127 | -0.08   |
| 62177117  | Baz2b    | bromodomain adjacent to zinc finger domain, 2B                                           | 1  | 0  | 0  | 1   | 0.91 #  |  | 0  | 1  | 0  | 1   | 0.18    |
| 157057182 | Brwd1    | bromodomain and WD repeat-containing protein 1 isoform B                                 | 0  | 0  | 0  | 0   |         |  | 0  | 3  | 4  | 7   | -0.14   |
| 125490358 | Brwd3    | bromodomain and WD repeat-containing protein 3                                           | 0  | 0  | 0  | 0   |         |  | 0  | 0  | 4  | 4   | -0.15   |
| 164698417 | Brd1     | bromodomain containing 1                                                                 | 0  | 0  | 0  | 0   |         |  | 0  | 6  | 9  | 15  | -0.11   |
| 140969817 | Bptf     | bromodomain PHD finger transcription factor                                              | 27 | 76 | 38 | 141 | 0.29 *  |  | 4  | 43 | 33 | 80  | 0.25    |
| 71067345  | Brd2     | bromodomain-containing protein 2                                                         | 14 | 23 | 15 | 52  | -0.21   |  | 0  | 0  | 16 | 16  | 0.10    |
| 71067347  | Brd2     | bromodomain-containing protein 2 isoform b                                               | 0  | 0  | 0  | 0   |         |  | 1  | 13 | 0  | 14  | -0.09   |
| 165972333 | Brd3     | bromodomain-containing protein 3 isoform 2                                               | 15 | 22 | 15 | 52  | -0.21   |  | 1  | 21 | 24 | 46  | -0.07   |
| 226342873 | Brd4     | bromodomain-containing protein 4 isoform 1                                               | 19 | 42 | 23 | 84  | 0.14    |  | 0  | 0  | 0  | 0   |         |
| 226246640 | Brd4     | bromodomain-containing protein 4 isoform 2                                               | 2  | 1  | 3  | 6   | -0.18   |  | 0  | 2  | 2  | 4   | 0.17    |
| 6755234   | Brd7     | bromodomain-containing protein 7                                                         | 15 | 34 | 14 | 63  | 0.01    |  | 1  | 3  | 1  | 5   | 0.11    |
| 185134208 | Brd8     | bromodomain-containing protein 8                                                         | 8  | 14 | 3  | 25  | 0.47 *  |  | 0  | 0  | 0  | 0   |         |
| 112817628 | Brd9     | bromodomain-containing protein 9                                                         | 0  | 1  | 1  | 2   | -2.39 # |  | 0  | 0  | 0  | 0   |         |
| 29725637  | Kctd10   | BTB/POZ domain-containing adapter for CUL3-mediated RhoA degradation protein 3 isoform 2 | 1  | 2  | 0  | 3   | 1.45 #  |  | 0  | 0  | 0  | 0   |         |
| 22122737  | Kctd15   | BTB/POZ domain-containing protein KCTD15                                                 | 1  | 0  | 0  | 1   | 0.00    |  | 0  | 0  | 0  | 0   |         |
| 22122459  | Bud13    | BUD13 homolog                                                                            | 0  | 0  | 1  | 1   | 0.35    |  | 0  | 0  | 0  | 0   |         |
| 164698440 | Bysl     | bystin                                                                                   | 2  | 1  | 1  | 4   | -0.10   |  | 1  | 10 | 19 | 30  | 0.12    |
| 261878543 | Mthfd1   | C-1-tetrahydrofolate synthase, cytoplasmic                                               | 3  | 2  | 3  | 8   | -0.01   |  | 0  | 3  | 12 | 15  | -0.28   |
| 13384836  | Sc4mol   | C-4 methylsterol oxidase                                                                 | 1  | 0  | 1  | 2   | -0.11   |  | 0  | 0  | 0  | 0   |         |
| 27370012  | Zmpste24 | CAAX prenyl protease 1 homolog                                                           | 1  | 0  | 0  | 1   | -0.62 # |  | 2  | 0  | 0  | 2   | -0.58 # |
| 12963507  | Rce1     | CAAX prenyl protease 2                                                                   | 2  | 0  | 0  | 2   | -0.24   |  | 0  | 0  | 0  | 0   |         |
| 6753374   | Cdh1     | cadherin-1                                                                               | 5  | 4  | 0  | 9   | 0.82 #  |  | 1  | 6  | 7  | 14  | 0.72 #  |
| 6680900   | Cdh16    | cadherin-16 precursor                                                                    | 7  | 1  | 7  | 15  | -0.22   |  | 0  | 2  | 11 | 13  | -0.25   |
| 6753242   | Calb1    | calbindin                                                                                | 1  | 0  | 0  | 1   | -5.43 # |  | 0  | 0  | 0  | 0   |         |
| 70995287  | Cabin1   | calcineurin binding protein 1                                                            | 2  | 18 | 2  | 22  | -0.02   |  | 0  | 0  | 0  | 0   |         |
| 84794597  | Ppp3r1   | calcineurin subunit B type 1                                                             | 0  | 2  | 1  | 3   | -0.29   |  | 0  | 0  | 0  | 0   |         |
| 119672912 | Cherp    | calcium homeostasis endoplasmic reticulum protein                                        | 6  | 9  | 14 | 29  | 0.12    |  | 3  | 8  | 3  | 14  | 0.12    |
| 21450201  | Cbara1   | calcium uptake protein 1, mitochondrial                                                  | 1  | 0  | 0  | 1   | -4.02 # |  | 0  | 0  | 0  | 0   |         |
| 18158420  | Camk2d   | calcium/calmodulin-dependent protein kinase type II subunit delta isoform 3              | 7  | 14 | 14 | 35  | 0.19    |  | 0  | 11 | 12 | 23  | 0.22    |
| 85362729  | Camk2g   | calcium/calmodulin-dependent protein kinase type II subunit gamma isoform 3              | 0  | 0  | 4  | 4   | 0.08    |  | 0  | 0  | 0  | 0   |         |
| 27369581  | Slc25a12 | calcium-binding mitochondrial carrier protein Aralar1                                    | 0  | 0  | 0  | 0   |         |  | 4  | 1  | 0  | 5   | -0.64 # |
| 294832028 | Slc25a13 | calcium-binding mitochondrial carrier protein Aralar2 isoform 2                          | 0  | 0  | 0  | 0   |         |  | 3  | 1  | 1  | 5   | 0.08    |

|           |               |                                                                                  |    |    |    |     |         |     |    |    |     |          |
|-----------|---------------|----------------------------------------------------------------------------------|----|----|----|-----|---------|-----|----|----|-----|----------|
| 27369998  | Slc25a24      | calcium-binding mitochondrial carrier protein SCaMC-1                            | 2  | 1  | 7  | 10  | -0.22   | 11  | 2  | 9  | 22  | -0.19    |
| 161086893 | Cab39         | calcium-binding protein 39                                                       | 1  | 0  | 0  | 1   | 0.09    | 0   | 0  | 0  | 0   |          |
| 9790225   | 1500003O03Rik | calcium-binding protein p22                                                      | 5  | 0  | 0  | 5   | -0.56   | 0   | 0  | 0  | 0   |          |
| 309270749 | LOC100504089  | calcium-binding protein p22-like, partial                                        | 0  | 1  | 6  | 7   | 0.43    | 0   | 1  | 2  | 3   | -0.06    |
| 33468885  | Cacybp        | calcyclin-binding protein                                                        | 3  | 2  | 1  | 6   | 0.24    | 0   | 0  | 0  | 0   |          |
| 21704156  | Cald1         | caldesmon 1                                                                      | 1  | 3  | 0  | 4   | 0.11    | 0   | 0  | 0  | 0   |          |
| 100816903 | Clmn          | calmin isoform b                                                                 | 0  | 1  | 0  | 1   | 1.17 #  | 0   | 5  | 1  | 6   | 1.52 #   |
| 6753244   | Calm1         | calmodulin                                                                       | 35 | 49 | 28 | 112 | 0.05    | 33  | 27 | 31 | 91  | 0.16     |
| 255069776 | 2310057J16Rik | calmodulin-regulated spectrin-associated protein 3 isoform 2                     | 5  | 6  | 5  | 16  | -0.29   | 0   | 0  | 1  | 1   | -0.28    |
| 160333216 | Canx          | calnexin precursor                                                               | 29 | 6  | 9  | 44  | -0.19   | 121 | 11 | 27 | 159 | -0.28 *  |
| 110227381 | Capns1        | calpain small subunit 1                                                          | 6  | 18 | 16 | 40  | -0.02   | 0   | 6  | 5  | 11  | -0.09    |
| 160333229 | Capn1         | calpain-1 catalytic subunit                                                      | 2  | 17 | 14 | 33  | -0.09   | 0   | 7  | 10 | 17  | 0.09     |
| 157951598 | Capn2         | calpain-2 catalytic subunit                                                      | 0  | 0  | 0  | 0   |         | 0   | 1  | 6  | 7   | -0.59 #  |
| 6680846   | Capn5         | calpain-5                                                                        | 2  | 5  | 3  | 10  | 0.26    | 4   | 7  | 7  | 18  | 1.53 #   |
| 33563246  | Cast          | calpastatin                                                                      | 0  | 5  | 3  | 8   | 0.18    | 0   | 0  | 0  | 0   |          |
| 6680952   | Cnn2          | calponin-2                                                                       | 3  | 1  | 2  | 6   | 0.55    | 0   | 0  | 2  | 2   | 0.19     |
| 21312564  | Cnn3          | calponin-3                                                                       | 11 | 2  | 1  | 14  | 1.22 #  | 0   | 10 | 5  | 15  | -0.69 #  |
| 6680836   | Calr          | calreticulin precursor                                                           | 26 | 4  | 9  | 39  | -0.05   | 24  | 10 | 27 | 61  | -0.18    |
| 6680840   | Calu          | calumenin isoform 1                                                              | 4  | 0  | 0  | 4   | -1.48 # | 0   | 0  | 1  | 1   | -2.52 #  |
| 41282022  | Calu          | calumenin isoform 2                                                              | 0  | 0  | 0  | 0   |         | 2   | 0  | 0  | 2   | -0.58 #  |
| 7110693   | Prkaca        | cAMP-dependent protein kinase catalytic subunit alpha                            | 0  | 2  | 2  | 4   | 0.21    | 0   | 2  | 6  | 8   | 0.23     |
| 255958318 | Prkacb        | cAMP-dependent protein kinase catalytic subunit beta isoform 2                   | 0  | 0  | 0  | 0   |         | 0   | 2  | 4  | 6   | -0.20    |
| 45598396  | Prkar2b       | cAMP-dependent protein kinase type II-beta regulatory subunit                    | 0  | 0  | 0  | 0   |         | 0   | 1  | 9  | 10  | -0.04    |
| 10946986  | Arpp19        | cAMP-regulated phosphoprotein 19 isoform 1                                       | 0  | 3  | 2  | 5   | 0.23    | 0   | 0  | 0  | 0   |          |
| 13385098  | Ntpcr         | cancer-related nucleoside-triphosphatase homolog                                 | 0  | 1  | 0  | 1   | 0.61 #  | 0   | 0  | 0  | 0   |          |
| 51093867  | Cad           | carbamoyl-phosphate synthetase 2, aspartate transcarbamylase, and dihydroorotase | 1  | 0  | 0  | 1   | 11.03 # | 0   | 0  | 3  | 3   | -0.33    |
| 298676452 | Carkd         | carbohydrate kinase domain-containing protein isoform 2                          | 2  | 0  | 0  | 2   | -0.07   | 0   | 0  | 0  | 0   |          |
| 157951596 | Car2          | carbonic anhydrase 2                                                             | 0  | 1  | 0  | 1   | 1.02 #  | 0   | 0  | 0  | 0   |          |
| 211057396 | Car5b         | carbonic anhydrase 5B, mitochondrial precursor                                   | 2  | 0  | 2  | 4   | -0.31 * | 0   | 0  | 0  | 0   |          |
| 113680352 | Cbr1          | carbonyl reductase [NADPH] 1                                                     | 0  | 0  | 0  | 0   |         | 0   | 0  | 6  | 6   | -0.04    |
| 6671688   | Cbr2          | carbonyl reductase [NADPH] 2                                                     | 10 | 7  | 12 | 29  | 0.12    | 0   | 9  | 5  | 14  | -0.01    |
| 27413160  | Cbr3          | carbonyl reductase 3                                                             | 0  | 0  | 0  | 0   |         | 0   | 1  | 1  | 2   | -0.14    |
| 269784762 | Cbr4          | carbonyl reductase family member 4                                               | 18 | 18 | 19 | 55  | -0.14   | 0   | 5  | 4  | 9   | -0.02    |
| 189458849 | Cpm           | carboxypeptidase M precursor                                                     | 0  | 0  | 0  | 0   |         | 0   | 8  | 2  | 10  | 0.56 #   |
| 6681075   | Ctf1          | cardiotrophin-1                                                                  | 1  | 0  | 1  | 2   | -0.12   | 0   | 0  | 1  | 1   | 0.68 #   |
| 85662408  | Crat          | carnitine O-acetyltransferase                                                    | 1  | 3  | 1  | 5   | -0.16   | 0   | 0  | 0  | 0   |          |
| 162287142 | Cpt1a         | carnitine O-palmitoyltransferase 1, liver isoform                                | 8  | 5  | 8  | 21  | -0.01   | 0   | 3  | 1  | 4   | 0.07     |
| 225543173 | Crtap         | cartilage-associated protein precursor                                           | 0  | 1  | 0  | 1   | 0.46    | 0   | 0  | 0  | 0   |          |
| 22165382  | Csnk1a1       | casein kinase I isoform alpha                                                    | 16 | 30 | 12 | 58  | -0.10   | 1   | 10 | 11 | 22  | -0.01    |
| 20544147  | Csnk1d        | casein kinase I isoform delta isoform 2                                          | 6  | 12 | 2  | 20  | 0.08    | 0   | 0  | 0  | 0   |          |
| 31542425  | Csnk1e        | casein kinase I isoform epsilon                                                  | 0  | 2  | 0  | 2   | 0.20    | 0   | 0  | 0  | 0   |          |
| 31542427  | Csnk2a1       | casein kinase II subunit alpha                                                   | 13 | 20 | 11 | 44  | 0.04    | 0   | 5  | 9  | 14  | 0.04     |
| 6753540   | Csnk2a2       | casein kinase II subunit alpha'                                                  | 11 | 9  | 4  | 24  | 0.09    | 0   | 0  | 0  | 0   |          |
| 7106277   | Csnk2b        | casein kinase II subunit beta                                                    | 18 | 21 | 21 | 60  | 0.00    | 1   | 13 | 10 | 24  | 0.10     |
| 161086929 | Card11        | caspase recruitment domain-containing protein 11                                 | 0  | 0  | 0  | 0   |         | 0   | 0  | 1  | 1   | -10.24 # |
| 6753284   | Casp3         | caspase-3                                                                        | 0  | 0  | 0  | 0   |         | 0   | 0  | 3  | 3   | -0.06    |

|           |               |                                                                        |    |    |    |     |         |    |     |     |     |          |  |
|-----------|---------------|------------------------------------------------------------------------|----|----|----|-----|---------|----|-----|-----|-----|----------|--|
| 157951736 | Casp6         | caspase-6 precursor                                                    | 0  | 1  | 0  | 1   | -0.96 # | 0  | 0   | 0   | 0   |          |  |
| 122056578 | Casp8         | caspase-8 precursor                                                    | 0  | 0  | 0  | 0   |         | 0  | 0   | 1   | 1   | 0.52 #   |  |
| 157951741 | Cat           | catalase                                                               | 4  | 0  | 0  | 4   | -0.02   | 0  | 0   | 0   | 0   |          |  |
| 161484634 | Comt          | catechol O-methyltransferase                                           | 26 | 5  | 3  | 34  | -0.13   | 5  | 11  | 11  | 27  | -0.21    |  |
| 33468999  | Comtd1        | catechol O-methyltransferase domain-containing protein 1               | 1  | 0  | 0  | 1   | -0.12   | 0  | 0   | 0   | 0   |          |  |
| 6753294   | Ctnna1        | catenin alpha-1                                                        | 62 | 79 | 70 | 211 | 0.18    | 65 | 110 | 147 | 322 | 0.57 *,# |  |
| 157951727 | Ctnna2        | catenin alpha-2 isoform 1                                              | 0  | 5  | 0  | 5   | 0.38    | 7  | 10  | 19  | 36  | 1.83 #   |  |
| 6671684   | Ctnnb1        | catenin beta-1                                                         | 17 | 17 | 13 | 47  | 0.51    | 29 | 47  | 85  | 161 | 0.65 *,# |  |
| 146219849 | Ctnnd1        | catenin delta-1 isoform 3                                              | 33 | 36 | 21 | 90  | 0.28    | 15 | 12  | 65  | 92  | 0.59 #   |  |
| 6681079   | Ctsb          | cathepsin B preproprotein                                              | 20 | 22 | 18 | 60  | -0.02   | 1  | 5   | 8   | 14  | -0.05    |  |
| 6753556   | Ctsd          | cathepsin D precursor                                                  | 25 | 18 | 30 | 73  | 0.03    | 0  | 6   | 5   | 11  | -0.03    |  |
| 166235890 | Ctsh          | cathepsin H preproprotein                                              | 9  | 10 | 9  | 28  | 0.00    | 0  | 2   | 1   | 3   | -0.36    |  |
| 6753558   | Ctsl          | cathepsin L1 preproprotein                                             | 4  | 9  | 5  | 18  | -0.09   | 0  | 1   | 0   | 1   | -0.47 #  |  |
| 11968166  | Ctsz          | cathepsin Z preproprotein                                              | 1  | 0  | 5  | 6   | 0.03    | 0  | 0   | 0   | 0   |          |  |
| 6680854   | Cav1          | caveolin-1                                                             | 0  | 3  | 1  | 4   | 0.58 #  | 0  | 1   | 1   | 2   | 0.06     |  |
| 18702317  | Cav2          | caveolin-2                                                             | 0  | 0  | 1  | 1   | 0.03    | 0  | 2   | 2   | 4   | 0.43     |  |
| 6753404   | Cebpb         | CCAAT/enhancer-binding protein beta                                    | 1  | 3  | 2  | 6   | 0.45 *  | 3  | 2   | 7   | 12  | 0.37     |  |
| 61966683  | Cebpg         | CCAAT/enhancer-binding protein gamma                                   | 0  | 1  | 2  | 3   | 0.13    | 0  | 0   | 0   | 0   |          |  |
| 67188876  | Cebpz         | CCAAT/enhancer-binding protein zeta                                    | 3  | 8  | 1  | 12  | -0.13   | 0  | 34  | 46  | 80  | 0.03     |  |
| 189458844 | Cnot1         | CCR4-NOT transcription complex subunit 1 isoform 2                     | 3  | 2  | 0  | 5   | 0.58 #  | 0  | 0   | 0   | 0   |          |  |
| 6755126   | Cnot7         | CCR4-NOT transcription complex subunit 7                               | 0  | 1  | 0  | 1   | 0.15    | 0  | 0   | 0   | 0   |          |  |
| 17505208  | Cd2bp2        | CD2 antigen cytoplasmic tail-binding protein 2                         | 3  | 4  | 3  | 10  | 0.33    | 0  | 1   | 1   | 2   | -0.09    |  |
| 125987599 | Cd2ap         | CD2-associated protein                                                 | 9  | 17 | 16 | 42  | 0.16    | 0  | 0   | 0   | 0   |          |  |
| 19526794  | Cd81          | CD81 antigen                                                           | 1  | 0  | 1  | 2   | -0.16   | 0  | 0   | 0   | 0   |          |  |
| 6680894   | Cd9           | CD9 antigen                                                            | 4  | 2  | 3  | 9   | -0.25   | 0  | 1   | 1   | 2   | 0.29     |  |
| 9910142   | Cdc42ep4      | cdc42 effector protein 4                                               | 0  | 1  | 2  | 3   | -0.11   | 0  | 0   | 0   | 0   |          |  |
| 27369483  | Cdc42se1      | CDC42 small effector protein 1 isoform 1                               | 2  | 1  | 1  | 4   | 0.18 *  | 0  | 1   | 0   | 1   | 0.31     |  |
| 19527354  | Trip10        | cdc42-interacting protein 4                                            | 5  | 14 | 19 | 38  | 0.14    | 0  | 1   | 1   | 2   | -0.02    |  |
| 19527228  | Cisd1         | CDGSH iron-sulfur domain-containing protein 1                          | 5  | 3  | 5  | 13  | -0.14   | 7  | 1   | 2   | 10  | 0.11     |  |
| 21728370  | Cisd2         | CDGSH iron-sulfur domain-containing protein 2                          | 4  | 3  | 6  | 13  | -0.24 * | 19 | 0   | 1   | 20  | -0.16    |  |
| 168229148 | Cisd3         | CDGSH iron-sulfur domain-containing protein 3, mitochondrial precursor | 0  | 1  | 0  | 1   | -0.02   | 1  | 2   | 1   | 4   | 0.16     |  |
| 50657347  | Cdk5rap2      | CDK5 regulatory subunit-associated protein 2                           | 1  | 1  | 2  | 4   | -2.94 # | 1  | 3   | 2   | 6   | -2.73 #  |  |
| 89363038  | Mnat1         | CDK-activating kinase assembly factor MAT1                             | 5  | 6  | 2  | 13  | 0.26    | 0  | 0   | 0   | 0   |          |  |
| 27369527  | Cdkn2aip      | CDKN2A-interacting protein                                             | 22 | 36 | 22 | 80  | 0.21 *  | 0  | 7   | 4   | 11  | 0.42     |  |
| 21313402  | Cdkn2aipnl    | CDKN2AIP N-terminal-like protein                                       | 7  | 3  | 2  | 12  | 0.14    | 0  | 0   | 1   | 1   | 0.18     |  |
| 28076897  | Cdipt         | CDP-diacylglycerol--inositol 3-phosphatidyltransferase isoform 1       | 10 | 1  | 0  | 11  | -0.27   | 11 | 1   | 3   | 15  | -0.30    |  |
| 133922586 | 4933424B01Rik | cell cycle regulator Mat89Bb homolog                                   | 3  | 7  | 3  | 13  | 0.27    | 0  | 1   | 0   | 1   | 0.15     |  |
| 10946722  | Rqcd1         | cell differentiation protein RCD1 homolog                              | 8  | 5  | 4  | 17  | -0.02   | 0  | 2   | 1   | 3   | -0.47 #  |  |
| 6753364   | Cdc42         | cell division control protein 42 homolog precursor                     | 13 | 17 | 11 | 41  | -0.05   | 15 | 13  | 11  | 39  | 0.03     |  |
| 22779899  | Cdc5l         | cell division cycle 5-related protein                                  | 55 | 66 | 58 | 179 | 0.07    | 73 | 75  | 90  | 238 | 0.17     |  |
| 33563288  | Ccar1         | cell division cycle and apoptosis regulator protein 1                  | 58 | 90 | 71 | 219 | 0.19 *  | 5  | 24  | 27  | 56  | -0.03    |  |
| 30387632  | Cdc23         | cell division cycle protein 23 homolog                                 | 0  | 1  | 0  | 1   | 0.20    | 0  | 0   | 0   | 0   |          |  |
| 124378022 | Cdc27         | cell division cycle protein 27 homolog                                 | 0  | 1  | 0  | 1   | 0.59 #  | 0  | 0   | 0   | 0   |          |  |
| 22122529  | Cdca7l        | cell division cycle-associated 7-like protein                          | 0  | 0  | 0  | 0   |         | 1  | 4   | 3   | 8   | 0.07     |  |
| 21313220  | Cdca7         | cell division cycle-associated protein 7                               | 0  | 0  | 0  | 0   |         | 0  | 4   | 4   | 8   | -0.36    |  |
| 309264229 | LOC640611     | cell division protein kinase 4-like                                    | 0  | 0  | 0  | 0   |         | 0  | 0   | 1   | 1   | -2.81 #  |  |

|           |               |                                                          |    |    |    |    |          |  |    |    |    |     |         |
|-----------|---------------|----------------------------------------------------------|----|----|----|----|----------|--|----|----|----|-----|---------|
| 188219567 | Lyar          | cell growth-regulating nucleolar protein                 | 35 | 29 | 29 | 93 | 0.11     |  | 5  | 18 | 24 | 47  | 0.07    |
| 157909782 | Cnbp          | cellular nucleic acid-binding protein isoform 2          | 6  | 13 | 12 | 31 | 0.10     |  | 0  | 0  | 0  | 0   |         |
| 157909784 | Cnbp          | cellular nucleic acid-binding protein isoform 3          | 13 | 14 | 13 | 40 | 0.07     |  | 1  | 11 | 13 | 25  | 0.34    |
| 187960040 | Trp53         | cellular tumor antigen p53 isoform b                     | 12 | 30 | 22 | 64 | 0.41     |  | 0  | 12 | 8  | 20  | 0.06    |
| 10257421  | Cetn2         | centrin-2                                                | 14 | 13 | 8  | 35 | 0.06     |  | 2  | 8  | 4  | 14  | 0.13 *  |
| 309264720 | LOC100503098  | centrin-2-like                                           | 1  | 0  | 0  | 1  | -0.07    |  | 0  | 0  | 0  | 0   |         |
| 6680922   | Cetn3         | centrin-3                                                | 5  | 7  | 5  | 17 | -0.07    |  | 1  | 4  | 2  | 7   | 0.22    |
| 164698406 | Cenpc1        | centromere protein C 1                                   | 0  | 0  | 0  | 0  |          |  | 0  | 3  | 8  | 11  | 0.02    |
| 189458891 | Cenpf         | centromere protein F                                     | 23 | 33 | 5  | 61 | 0.61 *,# |  | 0  | 0  | 0  | 0   |         |
| 22122337  | Cenpi         | centromere protein I                                     | 0  | 0  | 0  | 0  |          |  | 0  | 1  | 4  | 5   | -0.37   |
| 122939139 | Cenpm         | centromere protein M isoform 3                           | 0  | 0  | 0  | 0  |          |  | 0  | 2  | 1  | 3   | -0.02   |
| 29336049  | Cenpo         | centromere protein O                                     | 1  | 0  | 0  | 1  | -0.19    |  | 0  | 5  | 1  | 6   | -0.30   |
| 29789150  | Cenpp         | centromere protein P                                     | 0  | 0  | 0  | 0  |          |  | 0  | 0  | 1  | 1   | 1.34 #  |
| 13994186  | Cenpq         | centromere protein Q                                     | 3  | 3  | 0  | 6  | -0.06    |  | 0  | 0  | 7  | 7   | -0.10   |
| 13385850  | Itgb3bp       | centromere protein R                                     | 2  | 3  | 1  | 6  | -0.14    |  | 0  | 0  | 0  | 0   |         |
| 21312474  | Apid1         | centromere protein S                                     | 0  | 1  | 0  | 1  | -0.03    |  | 0  | 0  | 1  | 1   | -1.26 # |
| 47523382  | Mif1ip        | centromere protein U                                     | 2  | 2  | 3  | 7  | 0.42     |  | 0  | 6  | 6  | 12  | 0.11    |
| 225703070 | Cenpv         | centromere protein V                                     | 0  | 0  | 0  | 0  |          |  | 0  | 1  | 1  | 2   | -0.21   |
| 145208006 | Stra13        | centromere protein X                                     | 0  | 0  | 0  | 0  |          |  | 0  | 0  | 2  | 2   | -0.09   |
| 39841057  | Cep135        | centrosomal protein of 135 kDa                           | 0  | 0  | 0  | 0  |          |  | 0  | 1  | 0  | 1   | -0.08   |
| 160420304 | Cep164        | centrosomal protein of 164 kDa                           | 0  | 1  | 0  | 1  | 5.38 #   |  | 0  | 0  | 0  | 0   |         |
| 16033432  | Cep57         | centrosomal protein of 57 kDa                            | 0  | 0  | 0  | 0  |          |  | 0  | 1  | 0  | 1   | 1.29 #  |
| 75677520  | Cln6          | ceroid-lipofuscinosis, neuronal 6                        | 2  | 0  | 0  | 2  | -0.40    |  | 0  | 4  | 2  | 6   | -0.05   |
| 30520001  | Cggbp1        | CGG triplet repeat-binding protein 1                     | 29 | 37 | 21 | 87 | 0.02     |  | 0  | 3  | 5  | 8   | 0.30    |
| 30794432  | Chmp2b        | charged multivesicular body protein 2b                   | 0  | 3  | 0  | 3  | 0.42     |  | 0  | 0  | 0  | 0   |         |
| 31541959  | Vps24         | charged multivesicular body protein 3                    | 1  | 1  | 1  | 3  | -0.13    |  | 0  | 1  | 0  | 1   | 0.67 #  |
| 28077049  | Chmp4b        | charged multivesicular body protein 4b                   | 1  | 6  | 4  | 11 | 0.38     |  | 0  | 0  | 5  | 5   | 0.33    |
| 218083710 | Chid1         | chitinase domain-containing protein 1 isoform 1          | 0  | 7  | 0  | 7  | -0.56    |  | 0  | 0  | 0  | 0   |         |
| 31541939  | Chid1         | chitinase domain-containing protein 1 isoform 2          | 5  | 0  | 2  | 7  | -0.09 *  |  | 0  | 0  | 0  | 0   |         |
| 295293090 | Clcc1         | chloride channel CLIC-like protein 1 isoform 2 precursor | 1  | 0  | 0  | 1  | -0.04    |  | 0  | 0  | 0  | 0   |         |
| 15617203  | Clic1         | chloride intracellular channel protein 1                 | 9  | 2  | 10 | 21 | 0.09     |  | 23 | 36 | 69 | 128 | -0.08   |
| 27229085  | Clic3         | chloride intracellular channel protein 3                 | 0  | 1  | 0  | 1  | 1.19 #   |  | 0  | 0  | 1  | 1   | -0.32   |
| 7304963   | Clic4         | chloride intracellular channel protein 4                 | 12 | 9  | 6  | 27 | 0.22     |  | 0  | 1  | 3  | 4   | -0.17   |
| 30425036  | Chdh          | choline dehydrogenase, mitochondrial precursor           | 3  | 0  | 0  | 3  | -0.21    |  | 0  | 0  | 1  | 1   | -0.43   |
| 31559983  | Cept1         | choline/ethanolaminephosphotransferase 1                 | 0  | 1  | 0  | 1  | -0.20    |  | 0  | 0  | 0  | 0   |         |
| 29164513  | Pcyt1b        | choline-phosphate cytidyltransferase B isoform 2         | 0  | 0  | 0  | 0  |          |  | 0  | 1  | 0  | 1   | 0.32    |
| 18860511  | Chrac1        | chromatin accessibility complex protein 1                | 2  | 5  | 2  | 9  | 0.17     |  | 0  | 0  | 0  | 0   |         |
| 7304957   | Chaf1a        | chromatin assembly factor 1 subunit A                    | 15 | 26 | 17 | 58 | 0.24     |  | 0  | 19 | 2  | 21  | -0.01   |
| 21312470  | Chaf1b        | chromatin assembly factor 1 subunit B                    | 14 | 21 | 14 | 49 | 0.23 *   |  | 7  | 15 | 14 | 36  | 0.05    |
| 295054298 | 0610010K14Rik | chromatin complexes subunit BAP18 isoform 2              | 0  | 3  | 0  | 3  | 0.10     |  | 0  | 0  | 0  | 0   |         |
| 294862282 | 0610010K14Rik | chromatin complexes subunit BAP18 isoform 3              | 0  | 5  | 8  | 13 | 0.09     |  | 0  | 0  | 0  | 0   |         |
| 21389318  | 0610010K14Rik | chromatin complexes subunit BAP18 isoform 4              | 3  | 3  | 0  | 6  | 0.14     |  | 0  | 0  | 0  | 0   |         |
| 294862289 | 0610010K14Rik | chromatin complexes subunit BAP18 isoform 5              | 1  | 2  | 0  | 3  | 0.13     |  | 0  | 0  | 0  | 0   |         |
| 294862292 | 0610010K14Rik | chromatin complexes subunit BAP18 isoform 6              | 0  | 0  | 0  | 0  |          |  | 2  | 2  | 1  | 5   | 0.14    |
| 21312536  | Meaf6         | chromatin modification-related protein MEAF6             | 10 | 9  | 4  | 23 | -0.23    |  | 5  | 20 | 11 | 36  | 0.01    |

|           |              |                                                                     |     |     |     |     |        |     |     |     |      |       |   |
|-----------|--------------|---------------------------------------------------------------------|-----|-----|-----|-----|--------|-----|-----|-----|------|-------|---|
| 6671696   | Cbx1         | chromobox protein homolog 1                                         | 19  | 30  | 27  | 76  | 0.03   | 111 | 73  | 69  | 253  | -0.07 |   |
| 309264319 | LOC100504483 | chromobox protein homolog 3-like                                    | 27  | 40  | 34  | 101 | -0.09  | 199 | 91  | 91  | 381  | -0.06 |   |
| 309262917 | Gm5196       | chromobox protein homolog 3-like                                    | 0   | 0   | 0   | 0   |        | 0   | 8   | 13  | 21   | -0.13 |   |
| 309269987 | Gm6917       | chromobox protein homolog 3-like                                    | 0   | 0   | 0   | 0   |        | 0   | 2   | 0   | 2    | -0.17 |   |
| 6671694   | Cbx5         | chromobox protein homolog 5                                         | 46  | 56  | 50  | 152 | -0.24  | 190 | 102 | 91  | 383  | -0.21 |   |
| 61657984  | Cbx6         | chromobox protein homolog 6                                         | 1   | 1   | 0   | 2   | 0.27   | 0   | 3   | 3   | 6    | 0.12  |   |
| 7304947   | Cbx8         | chromobox protein homolog 8                                         | 8   | 8   | 1   | 17  | 0.00   | 0   | 8   | 3   | 11   | 0.00  |   |
| 189458810 | Chd2         | chromodomain helicase DNA binding protein 2                         | 0   | 5   | 2   | 7   | -0.19  | 4   | 23  | 24  | 51   | -0.08 |   |
| 124358950 | Chd3         | chromodomain helicase DNA binding protein 3                         | 35  | 55  | 54  | 144 | 0.17   | 30  | 56  | 55  | 141  | 0.21  |   |
| 189458814 | Chd5         | chromodomain helicase DNA binding protein 5 isoform 2               | 0   | 25  | 46  | 71  | 0.28   | 0   | 0   | 66  | 66   | 0.39  |   |
| 183396792 | Cdyl         | chromodomain Y-like protein isoform 2                               | 0   | 2   | 0   | 2   | -0.04  | 0   | 6   | 4   | 10   | 0.31  |   |
| 239985588 | Chd1         | chromodomain-helicase-DNA-binding protein 1                         | 2   | 0   | 0   | 2   | 0.14   | 0   | 13  | 13  | 26   | -0.04 |   |
| 13386044  | Chd11        | chromodomain-helicase-DNA-binding protein 1-like                    | 0   | 0   | 2   | 2   | 0.02   | 0   | 0   | 0   | 0    |       |   |
| 39204553  | Chd4         | chromodomain-helicase-DNA-binding protein 4                         | 177 | 257 | 219 | 653 | 0.20   | 133 | 403 | 517 | 1053 | 0.30  | * |
| 119392064 | Chd8         | chromodomain-helicase-DNA-binding protein 8                         | 4   | 9   | 4   | 17  | 0.62*# | 0   | 0   | 0   | 0    |       |   |
| 162287089 | Kif4         | chromosome-associated kinesin KIF4                                  | 4   | 7   | 6   | 17  | 0.00   | 0   | 1   | 0   | 1    | 0.13  |   |
| 189458807 | Cgn          | cingulin                                                            | 30  | 55  | 46  | 131 | 0.05   | 0   | 3   | 0   | 3    | 0.53  | # |
| 56550079  | Cgnl1        | cingulin-like protein 1                                             | 0   | 1   | 0   | 1   | -4.26# | 0   | 0   | 0   | 0    |       |   |
| 163954951 | Cirh1a       | cirhin                                                              | 0   | 2   | 0   | 2   | -0.32  | 3   | 18  | 14  | 35   | -0.01 |   |
| 256220113 | Clybl        | citrate lyase subunit beta-like protein, mitochondrial precursor    | 3   | 2   | 7   | 12  | -0.07  | 0   | 0   | 0   | 0    |       |   |
| 13385942  | Cs           | citrate synthase, mitochondrial precursor                           | 19  | 19  | 17  | 55  | -0.13  | 8   | 9   | 6   | 23   | -0.22 |   |
| 6755680   | Bhlhe40      | class E basic helix-loop-helix protein 40                           | 1   | 2   | 0   | 3   | 1.63#  | 1   | 0   | 0   | 1    | 9.98  | # |
| 51491845  | Cltc         | clathrin heavy chain 1                                              | 115 | 180 | 89  | 384 | 0.64*# | 63  | 256 | 407 | 726  | 0.30  |   |
| 154240730 | Clint1       | clathrin interactor 1                                               | 0   | 0   | 3   | 3   | -0.31  | 0   | 0   | 0   | 0    |       |   |
| 122939196 | Clta         | clathrin light chain A isoform d                                    | 0   | 1   | 0   | 1   | 0.13   | 0   | 0   | 0   | 0    |       |   |
| 30794164  | Cltb         | clathrin light chain B                                              | 1   | 1   | 0   | 2   | 0.59#  | 0   | 0   | 0   | 0    |       |   |
| 6753438   | Cldn3        | claudin-3                                                           | 4   | 5   | 7   | 16  | -0.43  | 15  | 7   | 11  | 33   | 0.44  | * |
| 6753440   | Cldn4        | claudin-4                                                           | 3   | 2   | 5   | 10  | 0.05   | 3   | 4   | 6   | 13   | 0.40  |   |
| 9055190   | Cldn6        | claudin-6                                                           | 0   | 0   | 0   | 0   |        | 0   | 3   | 0   | 3    | 0.20  |   |
| 302318906 | Cldn7        | claudin-7                                                           | 3   | 4   | 5   | 12  | -0.12  | 15  | 5   | 8   | 28   | 0.26  | * |
| 9055192   | Cldn8        | claudin-8                                                           | 2   | 2   | 0   | 4   | 0.16   | 0   | 2   | 4   | 6    | 0.43  |   |
| 61098102  | Cldn9        | claudin-9                                                           | 3   | 2   | 2   | 7   | -0.33* | 1   | 0   | 4   | 5    | 0.52  | # |
| 16751835  | Cpsf1        | cleavage and polyadenylation specificity factor subunit 1 isoform 2 | 107 | 115 | 75  | 297 | 0.18   | 16  | 56  | 65  | 137  | 0.07  |   |
| 8393762   | Cpsf2        | cleavage and polyadenylation specificity factor subunit 2           | 26  | 35  | 15  | 76  | 0.19   | 2   | 20  | 8   | 30   | 0.13  |   |
| 31980904  | Cpsf3        | cleavage and polyadenylation specificity factor subunit 3           | 20  | 23  | 19  | 62  | 0.17   | 0   | 7   | 5   | 12   | 0.11  |   |
| 30466247  | Cpsf4        | cleavage and polyadenylation specificity factor subunit 4           | 24  | 26  | 14  | 64  | 0.13   | 0   | 3   | 2   | 5    | 0.06  |   |
| 13386106  | Nudt21       | cleavage and polyadenylation specificity factor subunit 5           | 47  | 59  | 26  | 132 | 0.13   | 32  | 47  | 21  | 100  | 0.13  |   |
| 62909983  | Cpsf6        | cleavage and polyadenylation specificity factor subunit 6           | 54  | 63  | 35  | 152 | 0.15   | 17  | 27  | 9   | 53   | 0.22  | * |
| 256665245 | Cpsf7        | cleavage and polyadenylation specificity factor subunit 7 isoform 2 | 66  | 62  | 42  | 170 | 0.10   | 12  | 20  | 18  | 50   | 0.29  |   |
| 13195628  | Cstf1        | cleavage stimulation factor subunit 1                               | 23  | 29  | 20  | 72  | 0.12   | 1   | 17  | 5   | 23   | 0.08  |   |
| 18875338  | Cstf2        | cleavage stimulation factor subunit 2                               | 59  | 57  | 49  | 165 | 0.20   | 0   | 2   | 0   | 2    | 0.15  |   |
| 148277061 | Cstf2t       | cleavage stimulation factor subunit 2 tau variant                   | 6   | 20  | 13  | 39  | 0.22   | 0   | 0   | 0   | 0    |       |   |

|           |              |                                                                                          |    |    |    |     |        |  |    |    |    |     |        |
|-----------|--------------|------------------------------------------------------------------------------------------|----|----|----|-----|--------|--|----|----|----|-----|--------|
| 21704042  | Cstf3        | cleavage stimulation factor subunit 3 isoform 1                                          | 60 | 65 | 41 | 166 | 0.10   |  | 8  | 43 | 18 | 69  | 0.11   |
| 22122537  | Clptm1l      | clef lip and palate transmembrane protein 1-like protein                                 | 1  | 0  | 0  | 1   | -0.57  |  | 0  | 0  | 0  | 0   |        |
| 163644247 | Clasp1       | CLIP-associating protein 1 isoform 3                                                     | 0  | 3  | 0  | 3   | 1.53#  |  | 0  | 0  | 0  | 0   |        |
| 84871978  | Mycbp        | C-Myc-binding protein                                                                    | 5  | 3  | 6  | 14  | 0.11   |  | 2  | 2  | 1  | 5   | 0.08*  |
| 226823359 | Copa         | coatomer subunit alpha                                                                   | 11 | 9  | 15 | 35  | -0.19  |  | 1  | 9  | 34 | 44  | 0.22   |
| 15426055  | Copb1        | coatomer subunit beta                                                                    | 3  | 1  | 2  | 6   | 0.18   |  | 0  | 6  | 18 | 24  | -0.22  |
| 29789080  | Copb2        | coatomer subunit beta'                                                                   | 1  | 1  | 2  | 4   | -0.20  |  | 0  | 1  | 4  | 5   | -0.38  |
| 148747410 | Arcn1        | coatomer subunit delta                                                                   | 1  | 0  | 0  | 1   | -0.18  |  | 0  | 0  | 4  | 4   | 0.46#  |
| 10946972  | Cope         | coatomer subunit epsilon                                                                 | 7  | 0  | 5  | 12  | -0.38  |  | 0  | 1  | 3  | 4   | -0.29  |
| 8567338   | Copg         | coatomer subunit gamma isoform 1                                                         | 0  | 0  | 0  | 0   |        |  | 0  | 0  | 3  | 3   | -0.62# |
| 8567340   | Copg2        | coatomer subunit gamma-2                                                                 | 1  | 1  | 1  | 3   | -0.10  |  | 3  | 2  | 4  | 9   | -0.10  |
| 9789913   | Copz1        | coatomer subunit zeta-1                                                                  | 6  | 4  | 6  | 16  | -0.17* |  | 0  | 0  | 1  | 1   | -0.10  |
| 21313396  | Mmab         | cob(I)yrinic acid a,c-diamide adenosyltransferase, mitochondrial precursor               | 4  | 7  | 7  | 18  | -0.16  |  | 0  | 0  | 0  | 0   |        |
| 6680924   | Cfl1         | cofilin-1                                                                                | 34 | 32 | 25 | 91  | 0.00   |  | 32 | 40 | 43 | 115 | -0.08  |
| 149255823 | LOC100048522 | cofilin-1-like                                                                           | 1  | 0  | 0  | 1   | -0.01  |  | 0  | 0  | 0  | 0   |        |
| 6671746   | Cfl2         | cofilin-2                                                                                | 6  | 8  | 4  | 18  | 0.11   |  | 0  | 0  | 0  | 0   |        |
| 40254610  | Stag1        | cohesin subunit SA-1                                                                     | 26 | 47 | 37 | 110 | 0.07   |  | 4  | 51 | 36 | 91  | 0.17   |
| 118150674 | Stag2        | cohesin subunit SA-2                                                                     | 46 | 70 | 54 | 170 | 0.27*  |  | 5  | 56 | 48 | 109 | 0.27   |
| 157738617 | Cchcr1       | coiled-coil alpha-helical rod protein 1                                                  | 1  | 0  | 1  | 2   | -0.16  |  | 0  | 0  | 0  | 0   |        |
| 110835702 | Cc2d1a       | coiled-coil and C2 domain-containing protein 1A                                          | 0  | 5  | 2  | 7   | -0.59# |  | 0  | 1  | 0  | 1   | -0.17  |
| 28892935  | Cc2d1b       | coiled-coil and C2 domain-containing protein 1B                                          | 0  | 1  | 3  | 4   | 0.25   |  | 0  | 0  | 0  | 0   |        |
| 168823441 | Ccdc109a     | coiled-coil domain-containing protein 109A                                               | 3  | 1  | 1  | 5   | 0.41   |  | 13 | 7  | 8  | 28  | -0.16  |
| 58037169  | Ccdc115      | coiled-coil domain-containing protein 115                                                | 0  | 2  | 1  | 3   | -0.30  |  | 0  | 0  | 0  | 0   |        |
| 227496903 | Ccdc12       | coiled-coil domain-containing protein 12                                                 | 0  | 2  | 2  | 4   | 0.17   |  | 0  | 1  | 2  | 3   | 0.24   |
| 47059143  | Ccdc124      | coiled-coil domain-containing protein 124                                                | 3  | 10 | 6  | 19  | 0.00   |  | 0  | 0  | 0  | 0   |        |
| 13195630  | Ccdc127      | coiled-coil domain-containing protein 127 isoform 1                                      | 0  | 0  | 0  | 0   |        |  | 0  | 0  | 1  | 1   | 0.80#  |
| 116268089 | Ccdc134      | coiled-coil domain-containing protein 134 precursor                                      | 11 | 2  | 1  | 14  | -0.04  |  | 0  | 0  | 0  | 0   |        |
| 22779893  | Ccdc137      | coiled-coil domain-containing protein 137                                                | 3  | 5  | 2  | 10  | 0.01   |  | 0  | 1  | 1  | 2   | -0.11  |
| 85702181  | Ccdc160      | coiled-coil domain-containing protein 160                                                | 1  | 1  | 1  | 3   | -1.81# |  | 5  | 1  | 0  | 6   | -1.81# |
| 58037313  | Ccdc18       | coiled-coil domain-containing protein 18                                                 | 1  | 0  | 0  | 1   | -4.36# |  | 0  | 0  | 0  | 0   |        |
| 27229249  | Ccdc41       | coiled-coil domain-containing protein 41                                                 | 0  | 0  | 0  | 0   |        |  | 2  | 0  | 1  | 3   | -6.26# |
| 13385406  | Ccdc43       | coiled-coil domain-containing protein 43                                                 | 1  | 2  | 2  | 5   | -0.14  |  | 0  | 0  | 0  | 0   |        |
| 125628650 | Ccdc47       | coiled-coil domain-containing protein 47 precursor                                       | 3  | 2  | 3  | 8   | -0.46* |  | 5  | 0  | 2  | 7   | -0.49# |
| 59858549  | Ccdc55       | coiled-coil domain-containing protein 55                                                 | 1  | 1  | 0  | 2   | 0.00   |  | 0  | 0  | 0  | 0   |        |
| 226874940 | Ccdc58       | coiled-coil domain-containing protein 58 isoform 3                                       | 12 | 12 | 13 | 37  | -0.39  |  | 0  | 0  | 0  | 0   |        |
| 19526948  | Ccdc71       | coiled-coil domain-containing protein 71                                                 | 0  | 0  | 0  | 0   |        |  | 0  | 0  | 2  | 2   | -0.04  |
| 194473718 | Ccdc75       | coiled-coil domain-containing protein 75                                                 | 0  | 1  | 1  | 2   | 0.10   |  | 0  | 0  | 0  | 0   |        |
| 165905619 | Ccdc86       | coiled-coil domain-containing protein 86                                                 | 0  | 0  | 0  | 0   |        |  | 2  | 4  | 4  | 10  | 0.19   |
| 21450195  | Ccdc92       | coiled-coil domain-containing protein 92                                                 | 1  | 1  | 1  | 3   | -0.01  |  | 0  | 1  | 1  | 2   | -0.09  |
| 21312171  | Ccdc94       | coiled-coil domain-containing protein 94                                                 | 0  | 0  | 4  | 4   | 0.38   |  | 0  | 1  | 0  | 1   | -0.34  |
| 13384734  | Chchd1       | coiled-coil-helix-coiled-coil-helix domain-containing protein 1                          | 4  | 1  | 1  | 6   | -0.29  |  | 0  | 0  | 0  | 0   |        |
| 34013514  | Chchd10      | coiled-coil-helix-coiled-coil-helix domain-containing protein 10, mitochondrial          | 1  | 0  | 2  | 3   | 0.14   |  | 0  | 0  | 0  | 0   |        |
| 149274502 | LOC100045688 | coiled-coil-helix-coiled-coil-helix domain-containing protein 2, mitochondrial-like      | 24 | 18 | 16 | 58  | -0.20  |  | 7  | 3  | 8  | 18  | -0.18  |
| 21313618  | Chchd3       | coiled-coil-helix-coiled-coil-helix domain-containing protein 3, mitochondrial precursor | 1  | 2  | 1  | 4   | 0.89#  |  | 25 | 15 | 9  | 49  | 0.32   |



|           |               |                                                                           |    |    |    |    |       |     |     |     |     |      |       |   |
|-----------|---------------|---------------------------------------------------------------------------|----|----|----|----|-------|-----|-----|-----|-----|------|-------|---|
| 267844806 | Chchd6        | coiled-coil-helix-coiled-coil-helix domain-containing protein 6 isoform 2 | 1  | 0  | 0  | 1  | 0.15  |     | 4   | 3   | 6   | 13   | 0.51  | # |
| 31088924  | Chchd7        | coiled-coil-helix-coiled-coil-helix domain-containing protein 7           | 10 | 3  | 9  | 22 | -0.13 |     | 0   | 2   | 0   | 2    | 0.13  |   |
| 34304060  | Chchd8        | coiled-coil-helix-coiled-coil-helix domain-containing protein 8           | 1  | 0  | 0  | 1  | -0.27 |     | 0   | 0   | 0   | 0    |       |   |
| 134053929 | Coil          | coilin                                                                    | 2  | 0  | 0  | 2  | 0.20  |     | 0   | 5   | 5   | 10   | -0.51 | # |
| 240255574 | Csde1         | cold shock domain-containing protein E1 isoform 2                         | 1  | 4  | 6  | 11 | 0.06  |     | 0   | 2   | 1   | 3    | -2.49 | # |
| 6680946   | Cirbp         | cold-inducible RNA-binding protein                                        | 32 | 30 | 20 | 82 | -0.12 |     | 58  | 30  | 16  | 104  | 0.06  |   |
| 161484654 | Col4a1        | collagen alpha-1(IV) chain precursor                                      | 1  | 0  | 0  | 1  | -0.50 |     | 0   | 0   | 0   | 0    |       |   |
| 40789282  | Col18a1       | collagen alpha-1(XVIII) chain isoform 2                                   | 17 | 22 | 7  | 46 | 0.04  |     | 4   | 31  | 34  | 69   | -0.03 |   |
| 269315863 | Col6a5        | collagen alpha-5(VI) chain precursor                                      | 0  | 1  | 0  | 1  | 9.84  | #   | 0   | 0   | 0   | 0    |       |   |
| 22296603  | Comm3         | COMM domain-containing protein 3                                          | 0  | 0  | 0  | 0  |       |     | 0   | 1   | 0   | 1    | -0.57 | # |
| 309266718 | LOC100048759  | complement C3-like, partial                                               | 1  | 0  | 0  | 1  | -0.28 |     | 0   | 0   | 0   | 0    |       |   |
| 112181167 | C1qbp         | complement component 1 Q subcomponent-binding protein, mitochondrial      | 9  | 9  | 12 | 30 | -0.14 |     | 16  | 21  | 31  | 68   | -0.06 |   |
| 22165392  | Ncapd2        | condensin complex subunit 1                                               | 6  | 13 | 6  | 25 | 0.05  |     | 0   | 2   | 2   | 4    | -0.08 |   |
| 161016797 | Ncapd3        | condensin-2 complex subunit D3                                            | 10 | 9  | 8  | 27 | 0.47  | *   | 0   | 2   | 2   | 4    | -0.05 |   |
| 91208439  | Ncapg2        | condensin-2 complex subunit G2                                            | 0  | 2  | 1  | 3  | 0.63  | #   | 0   | 0   | 0   | 0    |       |   |
| 126090857 | Fam120a       | constitutive coactivator of PPAR-gamma-like protein 1                     | 1  | 0  | 3  | 4  | 0.03  |     | 0   | 0   | 11  | 11   | -0.40 |   |
| 295424139 | Gps1          | COP9 signalosome complex subunit 1 isoform 2                              | 1  | 4  | 4  | 9  | 0.09  |     | 0   | 1   | 0   | 1    | 0.29  |   |
| 70909327  | Cops2         | COP9 signalosome complex subunit 2                                        | 3  | 11 | 8  | 22 | 0.22  |     | 0   | 1   | 0   | 1    | 0.30  |   |
| 6753488   | Cops3         | COP9 signalosome complex subunit 3                                        | 7  | 11 | 5  | 23 | 0.28  | *   | 0   | 2   | 1   | 3    | 0.33  |   |
| 6753490   | Cops4         | COP9 signalosome complex subunit 4                                        | 6  | 10 | 15 | 31 | 0.22  |     | 0   | 0   | 0   | 0    |       |   |
| 7304971   | Cops5         | COP9 signalosome complex subunit 5                                        | 7  | 6  | 7  | 20 | 0.05  |     | 0   | 0   | 0   | 0    |       |   |
| 33563284  | Cops6         | COP9 signalosome complex subunit 6                                        | 5  | 6  | 7  | 18 | 0.60  | #   | 0   | 0   | 0   | 0    |       |   |
| 7242142   | Cops7a        | COP9 signalosome complex subunit 7a isoform 1                             | 5  | 15 | 5  | 25 | 0.18  |     | 0   | 4   | 0   | 4    | 0.45  | # |
| 114158691 | Cops8         | COP9 signalosome complex subunit 8                                        | 8  | 17 | 7  | 32 | 0.13  |     | 0   | 4   | 6   | 10   | 0.05  |   |
| 25141330  | Cpne1         | copine-1                                                                  | 0  | 0  | 1  | 1  | -0.31 |     | 0   | 0   | 0   | 0    |       |   |
| 23943807  | Cpne2         | copine-2                                                                  | 2  | 2  | 3  | 7  | -0.03 |     | 0   | 0   | 2   | 2    | -0.08 |   |
| 25141335  | Cpne3         | copine-3                                                                  | 0  | 0  | 0  | 0  |       |     | 0   | 1   | 0   | 1    | -0.46 | # |
| 21630253  | Cpne8         | copine-8 isoform 1                                                        | 2  | 9  | 3  | 14 | 0.06  |     | 0   | 0   | 0   | 0    |       |   |
| 165932339 | Cutc          | copper homeostasis protein cutC homolog isoform 2                         | 2  | 4  | 2  | 8  | 0.41  | *   | 0   | 0   | 0   | 0    |       |   |
| 161484660 | Cpox          | coproporphyrinogen-III oxidase, mitochondrial precursor                   | 15 | 5  | 12 | 32 | -0.20 |     | 0   | 3   | 4   | 7    | 0.11  |   |
| 189458847 | Cobll1        | cordon-bleu protein-like 1 isoform 2                                      | 0  | 2  | 0  | 2  | 0.39  |     | 0   | 0   | 0   | 0    |       |   |
| 283945579 | H2afy         | core histone macro-H2A.1 isoform 4                                        | 4  | 15 | 5  | 24 | -0.23 |     | 466 | 335 | 349 | 1150 | -0.02 |   |
| 238814333 | Cbfb          | core-binding factor subunit beta isoform 2                                | 6  | 7  | 5  | 18 | -0.06 |     | 1   | 5   | 4   | 10   | 0.12  |   |
| 6753494   | Coro1b        | coronin-1B                                                                | 7  | 7  | 6  | 20 | 0.18  |     | 0   | 0   | 3   | 3    | -0.26 |   |
| 31542413  | Coro1c        | coronin-1C                                                                | 14 | 15 | 15 | 44 | 0.15  |     | 0   | 0   | 1   | 1    | 0.01  |   |
| 30794278  | Coro2a        | coronin-2A                                                                | 0  | 6  | 0  | 6  | 0.08  |     | 0   | 0   | 0   | 0    |       |   |
| 133778913 | Hsd11b2       | corticosteroid 11-beta-dehydrogenase isozyme 2                            | 15 | 7  | 5  | 27 | -0.36 |     | 20  | 9   | 4   | 33   | 0.02  |   |
| 45598394  | Nr2f2         | COUP transcription factor 2 isoform 1                                     | 13 | 14 | 10 | 37 | -0.07 |     | 0   | 4   | 1   | 5    | 0.06  |   |
| 21735441  | Cmc1          | COX assembly mitochondrial protein homolog                                | 1  | 1  | 2  | 4  | 0.03  |     | 0   | 0   | 0   | 0    |       |   |
| 18390325  | Cxxc1         | cpG-binding protein                                                       | 0  | 2  | 3  | 5  | 0.28  |     | 0   | 0   | 0   | 0    |       |   |
| 6753412   | Cfdp1         | craniofacial development protein 1                                        | 0  | 1  | 1  | 2  | -0.21 | *   | 0   | 1   | 0   | 1    | 0.16  |   |
| 6753428   | Ckmt1         | creatine kinase U-type, mitochondrial precursor                           | 9  | 13 | 15 | 37 | 0.05  |     | 1   | 6   | 8   | 15   | 0.23  |   |
| 70995311  | Crebbp        | CREB-binding protein                                                      | 2  | 15 | 9  | 26 | 0.62  | *,# | 0   | 0   | 0   | 0    |       |   |
| 13385288  | Crnk1         | crooked neck-like protein 1                                               | 0  | 3  | 11 | 14 | 0.19  |     | 20  | 26  | 26  | 72   | 0.12  |   |
| 219689066 | 1500010J02Rik | CST complex subunit CTC1 isoform c                                        | 0  | 1  | 0  | 1  | 0.48  |     | 0   | 1   | 0   | 1    | 0.10  |   |

|           |               |                                                                |    |    |    |     |       |    |    |    |    |        |
|-----------|---------------|----------------------------------------------------------------|----|----|----|-----|-------|----|----|----|----|--------|
| 28827826  | Obfc1         | CST complex subunit STN1                                       | 0  | 1  | 0  | 1   | 0.37  | 0  | 1  | 0  | 1  | 0.14   |
| 254675210 | 2310004N24Rik | CST complex subunit TEN1                                       | 0  | 2  | 0  | 2   | 2.29# | 0  | 0  | 0  | 0  |        |
| 23956160  | Ctdnep1       | CTD nuclear envelope phosphatase 1                             | 1  | 1  | 0  | 2   | -0.21 | 0  | 3  | 0  | 3  | -0.26  |
| 47059059  | Ctdspl2       | CTD small phosphatase-like protein 2                           | 0  | 0  | 0  | 0   |       | 14 | 14 | 10 | 38 | -0.22  |
| 311893326 | Ctbp1         | C-terminal-binding protein 1 isoform 2                         | 5  | 8  | 6  | 19  | 0.19  | 0  | 3  | 0  | 3  | 0.23   |
| 6753548   | Ctbp2         | C-terminal-binding protein 2 isoform 2                         | 5  | 10 | 7  | 22  | 0.26  | 0  | 1  | 0  | 1  | 0.52#  |
| 38570084  | Celf1         | CUGBP Elav-like family member 1 isoform 2                      | 66 | 73 | 61 | 200 | -0.08 | 2  | 29 | 12 | 43 | 0.18   |
| 159032039 | Celf2         | CUGBP Elav-like family member 2 isoform 5                      | 36 | 0  | 0  | 36  | -0.03 | 0  | 0  | 0  | 0  |        |
| 237757269 | Celf2         | CUGBP Elav-like family member 2 isoform 7                      | 0  | 44 | 37 | 81  | -0.31 | 0  | 13 | 4  | 17 | -0.14  |
| 158711665 | Cul4b         | cullin 4B                                                      | 0  | 0  | 0  | 0   |       | 0  | 11 | 12 | 23 | 0.05   |
| 7549752   | Cul1          | cullin-1                                                       | 0  | 3  | 0  | 3   | 0.38  | 0  | 0  | 0  | 0  |        |
| 167466258 | Cul4a         | cullin-4A                                                      | 0  | 0  | 1  | 1   | 0.10  | 1  | 9  | 7  | 17 | -0.12  |
| 189409138 | Cand1         | cullin-associated NEDD8-dissociated protein 1                  | 18 | 29 | 32 | 79  | 0.01  | 0  | 6  | 6  | 12 | 0.09   |
| 124487291 | Cwf19l1       | CWF19-like protein 1                                           | 0  | 1  | 0  | 1   | 0.13  | 0  | 0  | 0  | 0  |        |
| 30842792  | Cwf19l2       | CWF19-like protein 2                                           | 0  | 0  | 0  | 0   |       | 0  | 0  | 1  | 1  | 0.12   |
| 19526854  | Cxxc5         | CXXC-type zinc finger protein 5                                | 6  | 7  | 6  | 19  | -0.13 | 11 | 0  | 1  | 12 | -0.16  |
| 86604724  | Atf1          | cyclic AMP-dependent transcription factor ATF-1                | 1  | 3  | 4  | 8   | -0.46 | 0  | 0  | 0  | 0  |        |
| 149252744 | LOC100047997  | cyclic AMP-dependent transcription factor ATF-2-like isoform 1 | 0  | 0  | 0  | 0   |       | 0  | 2  | 0  | 2  | 0.15   |
| 22122557  | Atf7          | cyclic AMP-dependent transcription factor ATF-7                | 2  | 2  | 0  | 4   | 0.10  | 0  | 1  | 0  | 1  | -0.26  |
| 158966707 | Creb1         | cyclic AMP-responsive element-binding protein 1 isoform C      | 7  | 4  | 8  | 19  | 0.15  | 0  | 5  | 5  | 10 | 0.13   |
| 172072638 | Ccnc          | cyclin-C isoform 2                                             | 7  | 6  | 5  | 18  | 0.97# | 0  | 1  | 0  | 1  | 0.50#  |
| 31542366  | Cdk1          | cyclin-dependent kinase 1                                      | 5  | 3  | 1  | 9   | 0.02  | 1  | 9  | 11 | 21 | -0.13  |
| 33695123  | Cdk11b        | cyclin-dependent kinase 11                                     | 1  | 7  | 4  | 12  | 0.07  | 0  | 4  | 1  | 5  | 0.14   |
| 157816961 | Cdk12         | cyclin-dependent kinase 12 isoform 2                           | 0  | 6  | 0  | 6   | 0.29  | 0  | 0  | 0  | 0  |        |
| 157824204 | Cdk12         | cyclin-dependent kinase 12 isoform 3                           | 2  | 0  | 0  | 2   | 0.33  | 0  | 0  | 0  | 0  |        |
| 189409171 | Cdk13         | cyclin-dependent kinase 13 isoform 2                           | 0  | 1  | 1  | 2   | 0.07  | 0  | 0  | 0  | 0  |        |
| 6679233   | Cdk18         | cyclin-dependent kinase 18                                     | 0  | 0  | 0  | 0   |       | 0  | 0  | 1  | 1  | 0.37   |
| 7949020   | Cdk2          | cyclin-dependent kinase 2 isoform 2                            | 3  | 2  | 2  | 7   | 0.26* | 0  | 2  | 3  | 5  | -0.13  |
| 49355794  | Cdk2ap1       | cyclin-dependent kinase 2-associated protein 1                 | 3  | 1  | 1  | 5   | 0.33* | 0  | 0  | 0  | 0  |        |
| 6753380   | Cdk4          | cyclin-dependent kinase 4                                      | 0  | 0  | 0  | 0   |       | 0  | 2  | 0  | 2  | -0.21  |
| 6680908   | Cdk5          | cyclin-dependent kinase 5                                      | 0  | 0  | 0  | 0   |       | 0  | 4  | 3  | 7  | -0.16  |
| 160333726 | Cdk7          | cyclin-dependent kinase 7                                      | 5  | 7  | 3  | 15  | 0.35* | 0  | 0  | 0  | 0  |        |
| 31652272  | Cdk8          | cyclin-dependent kinase 8                                      | 0  | 1  | 0  | 1   | 1.33# | 0  | 0  | 0  | 0  |        |
| 18699998  | Cdk9          | cyclin-dependent kinase 9                                      | 2  | 3  | 3  | 8   | 0.45  | 0  | 0  | 2  | 2  | 0.14   |
| 31542372  | Cdkn1b        | cyclin-dependent kinase inhibitor 1B                           | 4  | 4  | 4  | 12  | 0.40  | 0  | 1  | 0  | 1  | 0.72#  |
| 6753390   | Cdkn2a        | cyclin-dependent kinase inhibitor 2A, isoform 3 isoform 1      | 6  | 21 | 10 | 37  | 0.07  | 16 | 13 | 18 | 47 | -0.08  |
| 34304105  | Cdkl1         | cyclin-dependent kinase-like 1                                 | 2  | 0  | 2  | 4   | -0.41 | 0  | 1  | 0  | 1  | 0.11   |
| 51317387  | Gak           | cyclin-G-associated kinase                                     | 0  | 0  | 0  | 0   |       | 0  | 0  | 1  | 1  | 0.13   |
| 12963599  | Ccnh          | cyclin-H                                                       | 3  | 8  | 5  | 16  | 0.19  | 0  | 2  | 0  | 2  | -0.19  |
| 157841168 | Ccnk          | cyclin-K                                                       | 3  | 10 | 9  | 22  | 0.32* | 4  | 3  | 7  | 14 | 0.31*  |
| 70906460  | Ccnl1         | cyclin-L1                                                      | 0  | 5  | 1  | 6   | -0.02 | 0  | 2  | 0  | 2  | 0.22   |
| 37574068  | Fam58b        | cyclin-related protein FAM58A                                  | 2  | 2  | 1  | 5   | 0.18  | 0  | 2  | 0  | 2  | 0.17   |
| 6681069   | Csrp1         | cysteine and glycine-rich protein 1                            | 12 | 16 | 11 | 39  | 0.05  | 0  | 0  | 3  | 3  | 0.21   |
| 160707987 | Csrp2         | cysteine and glycine-rich protein 2                            | 5  | 6  | 2  | 13  | 0.11  | 0  | 0  | 0  | 0  |        |
| 161016824 | Nfs1          | cysteine desulfurase, mitochondrial                            | 1  | 1  | 2  | 4   | -0.05 | 0  | 1  | 0  | 1  | -0.29  |
| 55742749  | Chic1         | cysteine-rich hydrophobic domain 1 protein                     | 0  | 0  | 0  | 0   |       | 1  | 0  | 0  | 1  | -5.74# |
| 9910166   | Cript         | cysteine-rich PDZ-binding protein                              | 1  | 2  | 2  | 5   | 0.06  | 0  | 0  | 0  | 0  |        |

|           |              |                                                                          |     |     |     |     |       |    |     |     |     |       |   |
|-----------|--------------|--------------------------------------------------------------------------|-----|-----|-----|-----|-------|----|-----|-----|-----|-------|---|
| 6681015   | Crip1        | cysteine-rich protein 1                                                  | 1   | 1   | 1   | 3   | -0.18 | 0  | 0   | 0   | 0   |       |   |
| 13195646  | Crip2        | cysteine-rich protein 2                                                  | 22  | 16  | 19  | 57  | 0.00  | 0  | 4   | 5   | 9   | 0.05  |   |
| 19527148  | Creld1       | cysteine-rich with EGF-like domain protein 1 precursor                   | 1   | 0   | 0   | 1   | -0.48 | 0  | 0   | 0   | 0   |       |   |
| 21313278  | Creld2       | cysteine-rich with EGF-like domain protein 2 precursor                   | 1   | 0   | 0   | 1   | 0.00  | 0  | 0   | 0   | 0   |       |   |
| 167716849 | CYTB         | cytochrome b                                                             | 0   | 0   | 0   | 0   |       | 0  | 1   | 0   | 1   | -0.05 |   |
| 13385268  | Cyb5         | cytochrome b5                                                            | 2   | 0   | 0   | 2   | -0.29 | 1  | 0   | 0   | 1   | -0.09 |   |
| 31542438  | Cyb5b        | cytochrome b5 type B precursor                                           | 8   | 6   | 5   | 19  | -0.13 | 25 | 3   | 5   | 33  | -0.10 |   |
| 46593021  | Uqcrc1       | cytochrome b-c1 complex subunit 1, mitochondrial precursor               | 2   | 7   | 19  | 28  | 0.00  | 17 | 7   | 17  | 41  | 0.06  |   |
| 13385112  | Uqcrc11      | cytochrome b-c1 complex subunit 10                                       | 0   | 0   | 0   | 0   |       | 9  | 0   | 0   | 9   | -0.31 |   |
| 22267442  | Uqcrc2       | cytochrome b-c1 complex subunit 2, mitochondrial precursor               | 12  | 13  | 23  | 48  | -0.10 | 60 | 17  | 41  | 118 | 0.00  |   |
| 21539599  | Uqcrh        | cytochrome b-c1 complex subunit 6, mitochondrial                         | 0   | 0   | 0   | 0   |       | 1  | 0   | 0   | 1   | 0.02  |   |
| 13385726  | Uqcrb        | cytochrome b-c1 complex subunit 7                                        | 3   | 2   | 8   | 13  | 0.04  | 4  | 1   | 3   | 8   | 0.04  |   |
| 21539585  | Uqcrq        | cytochrome b-c1 complex subunit 8                                        | 1   | 2   | 2   | 5   | 0.03  | 0  | 0   | 0   | 0   |       |   |
| 37574048  | Uqcr10       | cytochrome b-c1 complex subunit 9                                        | 0   | 0   | 1   | 1   | -0.11 | 2  | 0   | 2   | 4   | 0.04  |   |
| 13385168  | Uqcrcfs1     | cytochrome b-c1 complex subunit Rieske, mitochondrial                    | 11  | 9   | 13  | 33  | -0.11 | 7  | 5   | 6   | 18  | -0.08 |   |
| 258679439 | Pet117       | cytochrome c oxidase assembly factor-like                                | 0   | 1   | 0   | 1   | -0.38 | 0  | 0   | 0   | 0   |       |   |
| 31541932  | Cox15        | cytochrome c oxidase assembly protein COX15 homolog                      | 0   | 0   | 1   | 1   | 0.12  | 1  | 0   | 0   | 1   | 0.04  |   |
| 6753498   | Cox4i1       | cytochrome c oxidase subunit 4 isoform 1, mitochondrial precursor        | 6   | 5   | 4   | 15  | -0.01 | 41 | 2   | 7   | 50  | 0.03  |   |
| 112181182 | Cox5a        | cytochrome c oxidase subunit 5A, mitochondrial precursor                 | 3   | 3   | 4   | 10  | 0.03  | 39 | 6   | 3   | 48  | 0.06  |   |
| 149263037 | LOC100046079 | cytochrome c oxidase subunit 5B, mitochondrial-like                      | 0   | 0   | 1   | 1   | 0.19  | 6  | 0   | 3   | 9   | 0.25  |   |
| 13385090  | Cox6b1       | cytochrome c oxidase subunit 6B1                                         | 4   | 2   | 2   | 8   | 0.06  | 15 | 3   | 5   | 23  | 0.13  |   |
| 149263103 | Gm6265       | cytochrome c oxidase subunit 6C-like                                     | 0   | 0   | 0   | 0   |       | 2  | 0   | 0   | 2   | -0.75 | # |
| 31981830  | Cox7a2       | cytochrome c oxidase subunit 7A2, mitochondrial precursor                | 1   | 0   | 0   | 1   | -0.23 | 15 | 0   | 6   | 21  | 0.01  |   |
| 6677977   | Cox7a2l      | cytochrome c oxidase subunit 7A-related protein, mitochondrial isoform 2 | 2   | 0   | 1   | 3   | 0.48  | 3  | 0   | 1   | 4   | 0.14  |   |
| 167716840 | COX2         | cytochrome c oxidase subunit II                                          | 0   | 0   | 3   | 3   | 0.19  | 0  | 0   | 24  | 24  | 0.29  |   |
| 34538601  | COX2         | cytochrome c oxidase subunit II                                          | 11  | 10  | 0   | 21  | -0.10 | 90 | 25  | 0   | 115 | -0.06 |   |
| 226453481 | COX3         | cytochrome c oxidase subunit III                                         | 0   | 0   | 0   | 0   |       | 0  | 0   | 2   | 2   | 0.24  |   |
| 149270456 | Gm10053      | cytochrome c, somatic-like isoform 2                                     | 31  | 19  | 25  | 75  | -0.01 | 0  | 0   | 2   | 2   | 0.08  |   |
| 13385006  | Cyc1         | cytochrome c1, heme protein, mitochondrial                               | 22  | 21  | 24  | 67  | -0.07 | 7  | 10  | 6   | 23  | -0.53 | # |
| 110347487 | Aco1         | cytoplasmic aconitate hydratase                                          | 0   | 0   | 0   | 0   |       | 0  | 0   | 1   | 1   | -2.14 | # |
| 134288917 | Dync1h1      | cytoplasmic dynein 1 heavy chain 1                                       | 146 | 434 | 304 | 884 | 0.23  | 9  | 141 | 284 | 434 | 0.17  |   |
| 6753658   | Dync1i2      | cytoplasmic dynein 1 intermediate chain 2 isoform 5                      | 8   | 6   | 13  | 27  | 0.31  | 0  | 0   | 1   | 1   | -0.13 |   |
| 22122795  | Dync1li1     | cytoplasmic dynein 1 light intermediate chain 1                          | 10  | 7   | 9   | 26  | 0.33  | 0  | 0   | 0   | 0   |       |   |
| 225543181 | Dync1li2     | cytoplasmic dynein 1 light intermediate chain 2                          | 2   | 5   | 10  | 17  | 0.16  | 0  | 2   | 0   | 2   | 0.66  | # |
| 26986541  | Dync2li1     | cytoplasmic dynein 2 light intermediate chain 1                          | 0   | 0   | 0   | 0   |       | 0  | 0   | 1   | 1   | -0.39 |   |
| 164698474 | Cyfp1        | cytoplasmic FMR1-interacting protein 1 isoform a                         | 25  | 33  | 36  | 94  | -0.22 | 0  | 24  | 21  | 45  | -0.02 |   |
| 258547119 | Cyfp1        | cytoplasmic FMR1-interacting protein 1 isoform b                         | 0   | 0   | 1   | 1   | -0.23 | 0  | 7   | 15  | 22  | -0.13 |   |
| 84370256  | Cyfp2        | cytoplasmic FMR1-interacting protein 2                                   | 10  | 18  | 18  | 46  | -0.19 | 0  | 0   | 7   | 7   | -0.25 |   |
| 260166721 | Ckap5        | cytoskeleton-associated protein 5 isoform 1                              | 0   | 0   | 12  | 12  | -0.07 | 0  | 0   | 0   | 0   |       |   |

|           |             |                                                                      |    |    |    |     |         |  |    |    |    |     |          |
|-----------|-------------|----------------------------------------------------------------------|----|----|----|-----|---------|--|----|----|----|-----|----------|
| 260166719 | Ckap5       | cytoskeleton-associated protein 5 isoform 2                          | 20 | 49 | 0  | 69  | 0.18    |  | 0  | 0  | 0  | 0   |          |
| 255069715 | Lap3        | cytosol aminopeptidase                                               | 3  | 0  | 0  | 3   | -0.48   |  | 0  | 0  | 0  | 0   |          |
| 225690614 | Acot7       | cytosolic acyl coenzyme A thioester hydrolase isoform 2              | 0  | 9  | 8  | 17  | -0.24   |  | 0  | 0  | 5  | 5   | 0.05     |
| 225690618 | Acot7       | cytosolic acyl coenzyme A thioester hydrolase isoform 3              | 5  | 0  | 0  | 5   | -0.13   |  | 0  | 2  | 0  | 2   | -0.12    |
| 27369816  | Engase      | cytosolic endo-beta-N-acetylglucosaminidase                          | 0  | 1  | 1  | 2   | 1.07 #  |  | 0  | 0  | 0  | 0   |          |
| 6754908   | Nubp2       | cytosolic Fe-S cluster assembly factor NUBP2                         | 0  | 0  | 0  | 0   |         |  | 0  | 0  | 1  | 1   | -0.14    |
| 31981273  | Cndp2       | cytosolic non-specific dipeptidase                                   | 0  | 0  | 0  | 0   |         |  | 0  | 1  | 0  | 1   | -0.68 #  |
| 256665238 | Nt5c2       | cytosolic purine 5'-nucleotidase isoform 3                           | 1  | 3  | 0  | 4   | -0.25   |  | 0  | 1  | 2  | 3   | -0.10    |
| 224922835 | Specc1l     | cytospin-A isoform b                                                 | 0  | 1  | 0  | 1   | 0.86 #  |  | 0  | 0  | 0  | 0   |          |
| 71979930  | Specc1      | cytospin-B                                                           | 0  | 1  | 0  | 1   | 0.42    |  | 0  | 0  | 0  | 0   |          |
| 29126213  | D19Bwg1357e | D19Bwg1357e protein                                                  | 0  | 0  | 0  | 0   |         |  | 22 | 31 | 34 | 87  | 0.08     |
| 52353955  | Phgdh       | D-3-phosphoglycerate dehydrogenase                                   | 0  | 0  | 2  | 2   | -0.18   |  | 1  | 11 | 24 | 36  | 0.43     |
| 42734496  | Fam3c       | D6Wsu176e protein precursor                                          | 6  | 1  | 5  | 12  | -0.51   |  | 5  | 2  | 1  | 8   | -0.09    |
| 169790818 | Dazap1      | DAZ-associated protein 1 isoform a                                   | 67 | 66 | 36 | 169 | -0.08   |  | 46 | 30 | 31 | 107 | -0.11    |
| 170014720 | Bdh1        | D-beta-hydroxybutyrate dehydrogenase, mitochondrial precursor        | 0  | 1  | 0  | 1   | -0.21   |  | 0  | 0  | 1  | 1   | -0.01    |
| 86476044  | Dcun1d1     | DCN1-like protein 1 isoform 2                                        | 10 | 15 | 8  | 33  | 0.04    |  | 0  | 7  | 3  | 10  | 0.03     |
| 23956220  | Dcun1d5     | DCN1-like protein 5                                                  | 2  | 2  | 0  | 4   | 0.35    |  | 0  | 0  | 0  | 0   |          |
| 168480115 | Dcaf13      | DDB1- and CUL4-associated factor 13                                  | 0  | 0  | 0  | 0   |         |  | 4  | 16 | 19 | 39  | -0.01    |
| 58037257  | Dcaf7       | DDB1- and CUL4-associated factor 7                                   | 0  | 0  | 4  | 4   | 0.30    |  | 0  | 1  | 3  | 4   | 0.15     |
| 254675193 | Ddx31       | DEAD/H (Asp-Glu-Ala-Asp/His) box polypeptide 31                      | 2  | 0  | 0  | 2   | 0.11    |  | 2  | 5  | 3  | 10  | 0.06     |
| 226246667 | Dhx16       | DEAH (Asp-Glu-Ala-His) box polypeptide 16                            | 13 | 15 | 16 | 44  | 0.06    |  | 0  | 21 | 12 | 33  | 0.22     |
| 112181185 | Daxx        | death domain-associated protein 6                                    | 0  | 2  | 1  | 3   | 0.63 #  |  | 0  | 0  | 0  | 0   |          |
| 51556456  | Dido1       | death-inducer obliterator 1 isoform 1                                | 0  | 0  | 0  | 0   |         |  | 1  | 0  | 0  | 1   | -0.23    |
| 76096375  | Dido1       | death-inducer obliterator 1 isoform 3                                | 14 | 34 | 17 | 65  | 0.41 *  |  | 0  | 0  | 0  | 0   |          |
| 88853584  | Dock1       | dedicator of cytokinesis protein 1                                   | 8  | 15 | 13 | 36  | -0.20   |  | 0  | 0  | 0  | 0   |          |
| 124358946 | Dock5       | dedicator of cytokinesis protein 5                                   | 0  | 2  | 2  | 4   | -0.21   |  | 0  | 0  | 0  | 0   |          |
| 78191789  | Dock7       | dedicator of cytokinesis protein 7                                   | 0  | 3  | 1  | 4   | 0.52    |  | 0  | 0  | 0  | 0   |          |
| 190194401 | Dock9       | dedicator of cytokinesis protein 9 isoform 4                         | 0  | 2  | 1  | 3   | 0.75 #  |  | 0  | 0  | 0  | 0   |          |
| 31980844  | Dhrs1       | dehydrogenase/reductase SDR family member 1                          | 11 | 1  | 2  | 14  | -1.05 # |  | 1  | 0  | 3  | 4   | -0.27    |
| 117647267 | Dhrs13      | dehydrogenase/reductase SDR family member 13 precursor               | 4  | 0  | 0  | 4   | -0.99 # |  | 0  | 0  | 1  | 1   | -1.01 #  |
| 256220343 | Dhrs4       | dehydrogenase/reductase SDR family member 4 isoform 1                | 32 | 29 | 19 | 80  | -0.04   |  | 0  | 0  | 0  | 0   |          |
| 13507612  | Dhrs4       | dehydrogenase/reductase SDR family member 4 isoform 2                | 0  | 0  | 0  | 0   |         |  | 0  | 3  | 3  | 6   | 0.02     |
| 226958616 | Dhrs7       | dehydrogenase/reductase SDR family member 7 precursor                | 2  | 0  | 0  | 2   | -0.23   |  | 0  | 0  | 0  | 0   |          |
| 285403538 | Dhrs7b      | dehydrogenase/reductase SDR family member 7B isoform 1               | 2  | 0  | 1  | 3   | 0.01    |  | 0  | 3  | 5  | 8   | -0.11    |
| 117414164 | Tm7sf2      | delta(14)-sterol reductase                                           | 0  | 0  | 0  | 0   |         |  | 0  | 0  | 6  | 6   | 0.04     |
| 114155129 | Dhcr24      | delta(24)-sterol reductase precursor                                 | 0  | 1  | 0  | 1   | 9.84 #  |  | 0  | 7  | 5  | 12  | -0.30    |
| 7949037   | Ech1        | delta(3,5)-Delta(2,4)-dienoyl-CoA isomerase, mitochondrial precursor | 12 | 7  | 9  | 28  | -0.04   |  | 0  | 0  | 0  | 0   |          |
| 255958294 | Aldh18a1    | delta-1-pyrroline-5-carboxylate synthase isoform 2                   | 9  | 1  | 0  | 10  | 0.05    |  | 3  | 1  | 3  | 7   | -0.22 *  |
| 147904706 | Dennd2d     | DENN domain-containing protein 2D isoform 2                          | 0  | 2  | 1  | 3   | 0.16    |  | 0  | 0  | 1  | 1   | -0.35    |
| 124486710 | Dennd3      | DENN domain-containing protein 3                                     | 0  | 0  | 0  | 0   |         |  | 0  | 0  | 1  | 1   | -10.24 # |
| 13386092  | Denr        | density-regulated protein                                            | 6  | 8  | 6  | 20  | -0.02   |  | 0  | 0  | 0  | 0   |          |

|           |              |                                                                                                                  |     |     |     |     |         |    |     |     |     |          |  |
|-----------|--------------|------------------------------------------------------------------------------------------------------------------|-----|-----|-----|-----|---------|----|-----|-----|-----|----------|--|
| 247269645 | Dguok        | deoxyguanosine kinase, mitochondrial isoform 2                                                                   | 2   | 0   | 0   | 2   | -0.25   | 0  | 0   | 0   | 0   |          |  |
| 19526976  | Dnttip1      | deoxynucleotidyltransferase terminal-interacting protein 1                                                       | 21  | 20  | 17  | 58  | -0.17   | 0  | 3   | 2   | 5   | 0.09     |  |
| 24418931  | Dnttip2      | deoxynucleotidyltransferase terminal-interacting protein 2                                                       | 19  | 15  | 19  | 53  | -0.19   | 70 | 102 | 132 | 304 | -0.02    |  |
| 148539953 | Dnase1l2     | deoxyribonuclease-1-like 2 precursor                                                                             | 4   | 0   | 2   | 6   | 0.18    | 0  | 0   | 2   | 2   | 0.19     |  |
| 21281687  | Dut          | deoxyuridine triphosphatase isoform 2                                                                            | 11  | 9   | 8   | 28  | -0.20   | 0  | 3   | 2   | 5   | -0.06    |  |
| 27754054  | Dcakd        | dephospho-CoA kinase domain-containing protein                                                                   | 10  | 7   | 3   | 20  | -0.17 * | 8  | 4   | 8   | 20  | -0.12    |  |
| 13195638  | Derl1        | derlin-1                                                                                                         | 2   | 0   | 0   | 2   | -0.12   | 0  | 0   | 0   | 0   |          |  |
| 7305007   | Dsc2         | desmocollin-2                                                                                                    | 0   | 0   | 0   | 0   |         | 0  | 2   | 2   | 4   | 1.51 #   |  |
| 161016843 | Dsg2         | desmoglein-2 precursor                                                                                           | 0   | 0   | 0   | 0   |         | 0  | 2   | 6   | 8   | 0.83 #   |  |
| 309263796 | LOC100044500 | desmoglein-2-like                                                                                                | 0   | 1   | 0   | 1   | 1.75 #  | 1  | 9   | 3   | 13  | 0.87 *,# |  |
| 190194418 | Dsp          | desmoplakin                                                                                                      | 15  | 64  | 23  | 102 | -0.01   | 90 | 262 | 343 | 695 | 0.61 *,# |  |
| 9790219   | Dstn         | destrin                                                                                                          | 12  | 15  | 8   | 35  | 0.10    | 10 | 18  | 10  | 38  | 0.02     |  |
| 189491666 | Dda1         | DET1- and DDB1-associated protein 1                                                                              | 1   | 0   | 0   | 1   | 0.04    | 0  | 0   | 0   | 0   |          |  |
| 6681225   | Drg1         | developmentally-regulated GTP-binding protein 1                                                                  | 3   | 2   | 8   | 13  | -0.10   | 0  | 0   | 0   | 0   |          |  |
| 10946678  | Drg2         | developmentally-regulated GTP-binding protein 2                                                                  | 0   | 0   | 0   | 0   |         | 0  | 1   | 4   | 5   | -0.31    |  |
| 9506541   | Dgke         | diacylglycerol kinase epsilon                                                                                    | 0   | 1   | 0   | 1   | 0.11    | 0  | 2   | 1   | 3   | -0.06    |  |
| 6753632   | Dgat1        | diacylglycerol O-acyltransferase 1                                                                               | 0   | 0   | 0   | 0   |         | 0  | 0   | 1   | 1   | 0.25     |  |
| 56790942  | Diexf        | digestive organ expansion factor homolog                                                                         | 1   | 2   | 4   | 7   | -0.01   | 0  | 9   | 7   | 16  | 0.04     |  |
| 7106289   | Dhfr         | dihydrofolate reductase                                                                                          | 1   | 0   | 0   | 1   | -0.36   | 4  | 7   | 6   | 17  | -0.18    |  |
| 31982856  | Dld          | dihydrolipoyl dehydrogenase, mitochondrial precursor                                                             | 25  | 12  | 24  | 61  | -0.22   | 9  | 7   | 5   | 21  | -0.04    |  |
| 257796245 | Dlat         | dihydrolipoyllysine-residue acetyltransferase component of pyruvate dehydrogenase complex, mitochondrial         | 17  | 11  | 11  | 39  | 0.02    | 8  | 12  | 15  | 35  | -0.11    |  |
| 21313536  | Dlst         | dihydrolipoyllysine-residue succinyltransferase component of 2-oxoglutarate dehydrogenase complex, mitochondrial | 16  | 21  | 14  | 51  | 0.14    | 0  | 0   | 0   | 0   |          |  |
| 40254595  | Dpysl2       | dihydropyrimidinase-related protein 2                                                                            | 5   | 4   | 0   | 9   | 0.46    | 0  | 0   | 0   | 0   |          |  |
| 160298207 | Gnpat        | dihydroxyacetone phosphate acyltransferase                                                                       | 1   | 0   | 0   | 1   | 2.88 #  | 0  | 0   | 0   | 0   |          |  |
| 22122569  | Tfb1m        | dimethyladenosine transferase 1, mitochondrial                                                                   | 1   | 0   | 0   | 1   | -0.04   | 0  | 0   | 0   | 0   |          |  |
| 160707990 | Ctsc         | dipeptidyl peptidase 1 preproprotein                                                                             | 6   | 4   | 4   | 14  | -0.02   | 0  | 0   | 0   | 0   |          |  |
| 150378458 | Adam10       | disintegrin and metalloproteinase domain-containing protein 10 precursor                                         | 4   | 2   | 3   | 9   | 0.18    | 0  | 1   | 0   | 1   | -0.03    |  |
| 40254642  | Dlg1         | disks large homolog 1                                                                                            | 12  | 22  | 8   | 42  | 0.31    | 0  | 5   | 1   | 6   | 0.55 #   |  |
| 313661491 | Dnmt1        | DNA (cytosine-5)-methyltransferase 1 isoform 1                                                                   | 165 | 168 | 222 | 555 | -0.03   | 88 | 76  | 151 | 315 | -0.08 *  |  |
| 313661495 | Dnmt1        | DNA (cytosine-5)-methyltransferase 1 isoform 2                                                                   | 157 | 138 | 218 | 513 | -0.04   | 0  | 65  | 149 | 214 | -0.10    |  |
| 313661497 | Dnmt1        | DNA (cytosine-5)-methyltransferase 1 isoform 3                                                                   | 0   | 0   | 0   | 0   |         | 0  | 32  | 73  | 105 | -0.17    |  |
| 313661499 | Dnmt1        | DNA (cytosine-5)-methyltransferase 1 isoform 4                                                                   | 0   | 0   | 0   | 0   |         | 0  | 33  | 0   | 33  | -0.20    |  |
| 6681209   | Dnmt3a       | DNA (cytosine-5)-methyltransferase 3A isoform 1                                                                  | 0   | 0   | 2   | 2   | 0.05    | 40 | 65  | 97  | 202 | 0.05     |  |
| 24371231  | Dnmt3a       | DNA (cytosine-5)-methyltransferase 3A isoform 2                                                                  | 0   | 0   | 0   | 0   |         | 0  | 3   | 3   | 6   | 0.30     |  |
| 7657011   | Ddb1         | DNA damage-binding protein 1                                                                                     | 6   | 14  | 10  | 30  | 0.11    | 30 | 103 | 121 | 254 | -0.01    |  |
| 29150251  | Ddb2         | DNA damage-binding protein 2                                                                                     | 1   | 1   | 2   | 4   | 0.04    | 0  | 0   | 0   | 0   |          |  |
| 187960064 | Ercc1        | DNA excision repair protein ERCC-1 isoform a                                                                     | 0   | 1   | 0   | 1   | 0.20    | 0  | 0   | 0   | 0   |          |  |
| 133892266 | Lig1         | DNA ligase 1                                                                                                     | 7   | 21  | 27  | 55  | 0.32 *  | 0  | 0   | 4   | 4   | 0.06     |  |

|           |              |                                                     |     |     |     |     |         |  |     |     |     |     |        |
|-----------|--------------|-----------------------------------------------------|-----|-----|-----|-----|---------|--|-----|-----|-----|-----|--------|
| 71061470  | Lig3         | DNA ligase 3                                        | 3   | 3   | 1   | 7   | 0.15    |  | 0   | 0   | 0   | 0   |        |
| 12963557  | Dmap1        | DNA methyltransferase 1-associated protein 1        | 7   | 10  | 9   | 26  | 0.24*   |  | 1   | 12  | 3   | 16  | 0.12   |
| 6678938   | Msh2         | DNA mismatch repair protein Msh2                    | 0   | 5   | 1   | 6   | 0.31*   |  | 0   | 12  | 28  | 40  | 0.01   |
| 6754744   | Msh6         | DNA mismatch repair protein Msh6                    | 5   | 17  | 13  | 35  | 0.15    |  | 1   | 11  | 42  | 54  | 0.08   |
| 6679409   | Pola1        | DNA polymerase alpha catalytic subunit              | 0   | 5   | 2   | 7   | 0.33    |  | 0   | 0   | 0   | 0   |        |
| 21729749  | Polb         | DNA polymerase beta                                 | 4   | 4   | 3   | 11  | -0.01   |  | 0   | 0   | 0   | 0   |        |
| 254587977 | Pold1        | DNA polymerase delta catalytic subunit              | 14  | 11  | 17  | 42  | 0.11    |  | 0   | 0   | 0   | 0   |        |
| 226423863 | Pold2        | DNA polymerase delta subunit 2                      | 6   | 10  | 10  | 26  | 0.14    |  | 0   | 2   | 4   | 6   | 1.81#  |
| 29789321  | Pold3        | DNA polymerase delta subunit 3                      | 0   | 4   | 0   | 4   | 0.07    |  | 0   | 0   | 0   | 0   |        |
| 21312396  | Pold4        | DNA polymerase delta subunit 4                      | 3   | 0   | 5   | 8   | 0.27*   |  | 0   | 0   | 0   | 0   |        |
| 195947387 | Pole         | DNA polymerase epsilon catalytic subunit A          | 1   | 3   | 3   | 7   | -0.97#  |  | 0   | 0   | 0   | 0   |        |
| 31981174  | Pole3        | DNA polymerase epsilon subunit 3                    | 18  | 17  | 17  | 52  | 0.05    |  | 0   | 0   | 0   | 0   |        |
| 13385366  | Pole4        | DNA polymerase epsilon subunit 4                    | 12  | 12  | 5   | 29  | -0.05   |  | 0   | 0   | 0   | 0   |        |
| 6679461   | Prim2        | DNA primase large subunit                           | 6   | 3   | 3   | 12  | -0.03   |  | 0   | 5   | 2   | 7   | -0.13  |
| 6679459   | Prim1        | DNA primase small subunit                           | 0   | 3   | 1   | 4   | 0.06    |  | 0   | 0   | 0   | 0   |        |
| 241666402 | Ercc4        | DNA repair endonuclease XPF                         | 1   | 3   | 1   | 5   | 0.39    |  | 0   | 1   | 0   | 1   | -0.17  |
| 121247429 | Xpc          | DNA repair protein complementing XP-C cells homolog | 10  | 7   | 3   | 20  | 0.25    |  | 0   | 1   | 1   | 2   | 0.13   |
| 153945822 | Rad50        | DNA repair protein RAD50                            | 43  | 74  | 46  | 163 | 0.52*   |  | 0   | 11  | 4   | 15  | 0.31   |
| 40254551  | Rev1         | DNA repair protein REV1                             | 0   | 0   | 1   | 1   | -10.32# |  | 0   | 0   | 0   | 0   |        |
| 170295844 | Xrcc1        | DNA repair protein XRCC1                            | 2   | 4   | 3   | 9   | 0.02    |  | 0   | 0   | 1   | 1   | 0.78#  |
| 31982546  | Cdt1         | DNA replication factor Cdt1                         | 1   | 2   | 0   | 3   | 0.15    |  | 0   | 0   | 0   | 0   |        |
| 172088119 | Mcm2         | DNA replication licensing factor MCM2               | 87  | 49  | 77  | 213 | 0.17    |  | 44  | 82  | 169 | 295 | -0.15  |
| 33859484  | Mcm3         | DNA replication licensing factor MCM3               | 36  | 46  | 36  | 118 | 0.12*   |  | 68  | 118 | 181 | 367 | -0.08  |
| 255918149 | Mcm4         | DNA replication licensing factor MCM4               | 33  | 34  | 26  | 93  | 0.17*   |  | 35  | 88  | 138 | 261 | -0.03  |
| 112293273 | Mcm5         | DNA replication licensing factor MCM5               | 27  | 21  | 26  | 74  | 0.09    |  | 54  | 82  | 145 | 281 | -0.11  |
| 6678832   | Mcm6         | DNA replication licensing factor MCM6               | 47  | 33  | 48  | 128 | 0.21    |  | 136 | 118 | 249 | 503 | -0.08  |
| 10242373  | Mcm7         | DNA replication licensing factor MCM7               | 34  | 32  | 25  | 91  | 0.13    |  | 83  | 101 | 215 | 399 | -0.07  |
| 227908825 | Fam50b       | DNA segment, human D6S2654E                         | 3   | 0   | 4   | 7   | 0.20    |  | 0   | 1   | 0   | 1   | -0.32  |
| 112734855 | Top1         | DNA topoisomerase 1                                 | 96  | 148 | 96  | 340 | -0.19   |  | 102 | 107 | 168 | 377 | -0.16* |
| 153945749 | Top2a        | DNA topoisomerase 2-alpha                           | 133 | 117 | 98  | 348 | -0.13   |  | 22  | 83  | 104 | 209 | -0.10  |
| 34328148  | Top2b        | DNA topoisomerase 2-beta                            | 133 | 130 | 110 | 373 | -0.08   |  | 99  | 269 | 252 | 620 | -0.04  |
| 31559817  | Topbp1       | DNA topoisomerase 2-binding protein 1               | 1   | 0   | 0   | 1   | 1.16#   |  | 0   | 0   | 0   | 0   |        |
| 6753086   | Apex1        | DNA-(apurinic or apyrimidinic site) lyase           | 55  | 85  | 50  | 190 | 0.04    |  | 19  | 22  | 32  | 73  | 0.04   |
| 33859684  | Kin          | DNA/RNA-binding protein KIN17                       | 6   | 8   | 4   | 18  | 0.12*   |  | 0   | 0   | 0   | 0   |        |
| 268370034 | Mpg          | DNA-3-methyladenine glycosylase                     | 12  | 8   | 5   | 25  | -0.07   |  | 0   | 0   | 0   | 0   |        |
| 20806532  | Csda         | DNA-binding protein A short isoform                 | 4   | 3   | 10  | 17  | -0.18   |  | 0   | 2   | 11  | 13  | -0.22  |
| 6677731   | Rfx2         | DNA-binding protein RFX2 isoform 2                  | 1   | 0   | 0   | 1   | 0.02    |  | 0   | 1   | 0   | 1   | 0.66#  |
| 309267227 | LOC100048268 | DNA-binding protein RFXANK-like, partial            | 0   | 4   | 2   | 6   | 0.12    |  | 0   | 0   | 0   | 0   |        |
| 124517706 | Prkdc        | DNA-dependent protein kinase catalytic subunit      | 27  | 104 | 46  | 177 | -0.09   |  | 0   | 9   | 19  | 28  | 0.14   |
| 256985188 | Polr1a       | DNA-directed RNA polymerase I subunit RPA1          | 34  | 55  | 69  | 158 | 0.11    |  | 0   | 14  | 46  | 60  | 0.40   |
| 12963545  | Znr1         | DNA-directed RNA polymerase I subunit RPA12         | 7   | 5   | 4   | 16  | 0.06    |  | 0   | 0   | 0   | 0   |        |
| 224967092 | Polr1b       | DNA-directed RNA polymerase I subunit RPA2          | 9   | 19  | 16  | 44  | 0.16    |  | 0   | 2   | 4   | 6   | 0.29   |
| 22003860  | Cd3eap       | DNA-directed RNA polymerase I subunit RPA34         | 1   | 3   | 5   | 9   | 0.12    |  | 0   | 2   | 2   | 4   | 0.26   |
| 27545207  | Twistnb      | DNA-directed RNA polymerase I subunit RPA43         | 3   | 5   | 7   | 15  | -0.06   |  | 0   | 0   | 0   | 0   |        |
| 12328816  | Polr1e       | DNA-directed RNA polymerase I subunit RPA49         | 6   | 5   | 5   | 16  | 0.32    |  | 0   | 2   | 0   | 2   | 0.55#  |
| 6677795   | Polr2a       | DNA-directed RNA polymerase II subunit RPB1         | 23  | 55  | 40  | 118 | 0.18    |  | 94  | 231 | 327 | 652 | 0.02   |

|           |              |                                                                                              |    |    |    |     |         |     |     |     |     |         |
|-----------|--------------|----------------------------------------------------------------------------------------------|----|----|----|-----|---------|-----|-----|-----|-----|---------|
| 188219604 | Polr2j       | DNA-directed RNA polymerase II subunit RPB11                                                 | 4  | 0  | 2  | 6   | 0.13    | 8   | 0   | 5   | 13  | 0.00    |
| 226958589 | Polr2b       | DNA-directed RNA polymerase II subunit RPB2                                                  | 15 | 27 | 15 | 57  | 0.01    | 42  | 179 | 203 | 424 | 0.05 *  |
| 29336059  | Polr2c       | DNA-directed RNA polymerase II subunit RPB3                                                  | 8  | 8  | 11 | 27  | 0.21    | 29  | 32  | 22  | 83  | 0.02    |
| 21312246  | Polr2d       | DNA-directed RNA polymerase II subunit RPB4 isoform 1                                        | 14 | 20 | 11 | 45  | 0.14    | 29  | 16  | 11  | 56  | 0.07    |
| 13385826  | Polr2g       | DNA-directed RNA polymerase II subunit RPB7                                                  | 14 | 18 | 11 | 43  | 0.06    | 12  | 27  | 24  | 63  | -0.24   |
| 110625757 | Polr2i       | DNA-directed RNA polymerase II subunit RPB9                                                  | 9  | 10 | 7  | 26  | 0.19    | 24  | 7   | 3   | 34  | 0.12    |
| 198278473 | Polr3c       | DNA-directed RNA polymerase III subunit RPC3                                                 | 0  | 0  | 0  | 0   |         | 0   | 1   | 0   | 1   | -0.31   |
| 119226251 | Polr1c       | DNA-directed RNA polymerases I and III subunit RPAC1                                         | 5  | 5  | 6  | 16  | 0.11    | 0   | 3   | 5   | 8   | 0.13    |
| 6677791   | Polr1d       | DNA-directed RNA polymerases I and III subunit RPAC2 isoform 1                               | 5  | 7  | 7  | 19  | 0.07    | 0   | 0   | 0   | 0   |         |
| 124249077 | Polr2e       | DNA-directed RNA polymerases I, II, and III subunit RPABC1                                   | 11 | 16 | 9  | 36  | 0.07    | 23  | 23  | 13  | 59  | 0.09    |
| 58037181  | Polr2f       | DNA-directed RNA polymerases I, II, and III subunit RPABC2                                   | 0  | 0  | 2  | 2   | 0.73 #  | 0   | 3   | 0   | 3   | 0.13    |
| 21704118  | Polr2h       | DNA-directed RNA polymerases I, II, and III subunit RPABC3                                   | 15 | 9  | 14 | 38  | 0.15    | 23  | 2   | 11  | 36  | 0.11 *  |
| 219881031 | Polr2l       | DNA-directed RNA polymerases I, II, and III subunit RPABC5                                   | 1  | 1  | 1  | 3   | 0.28    | 2   | 0   | 2   | 4   | 0.11    |
| 247494234 | Dnajc13      | DnaJ (Hsp40) homolog, subfamily C, member 13                                                 | 1  | 3  | 3  | 7   | 0.09    | 0   | 0   | 1   | 1   | -0.35   |
| 6680297   | Dnaja1       | dnaJ homolog subfamily A member 1                                                            | 10 | 23 | 16 | 49  | -0.44   | 2   | 25  | 29  | 56  | -0.04   |
| 9789937   | Dnaja2       | dnaJ homolog subfamily A member 2                                                            | 23 | 23 | 23 | 69  | -0.22   | 58  | 42  | 82  | 182 | 0.11    |
| 205361114 | Dnaja3       | dnaJ homolog subfamily A member 3, mitochondrial isoform 2                                   | 5  | 8  | 1  | 14  | -0.08   | 7   | 18  | 22  | 47  | 0.02    |
| 9055242   | Dnajb1       | dnaJ homolog subfamily B member 1                                                            | 9  | 9  | 13 | 31  | -0.03   | 0   | 4   | 6   | 10  | 0.11    |
| 299890784 | Dnajb11      | dnaJ homolog subfamily B member 11 precursor                                                 | 7  | 7  | 7  | 21  | -0.10   | 9   | 11  | 19  | 39  | -0.11   |
| 31982701  | Dnajb12      | dnaJ homolog subfamily B member 12                                                           | 2  | 2  | 1  | 5   | -0.21   | 0   | 2   | 0   | 2   | 0.17    |
| 21313156  | Dnajb4       | dnaJ homolog subfamily B member 4                                                            | 11 | 17 | 17 | 45  | -0.01   | 0   | 3   | 3   | 6   | -0.12   |
| 83816907  | Dnajb6       | dnaJ homolog subfamily B member 6 isoform a                                                  | 0  | 0  | 0  | 0   |         | 0   | 3   | 8   | 11  | 0.17    |
| 188219644 | Dnajb6       | dnaJ homolog subfamily B member 6 isoform d                                                  | 1  | 1  | 0  | 2   | -0.05   | 0   | 4   | 4   | 8   | -0.01   |
| 119508443 | Dnajc10      | dnaJ homolog subfamily C member 10                                                           | 8  | 10 | 6  | 24  | -0.10   | 0   | 5   | 8   | 13  | 0.02    |
| 254540074 | Dnajc17      | dnaJ homolog subfamily C member 17                                                           | 5  | 10 | 7  | 22  | -0.08   | 0   | 0   | 0   | 0   |         |
| 6677659   | Dnajc2       | dnaJ homolog subfamily C member 2                                                            | 0  | 2  | 0  | 2   | 0.30    | 0   | 0   | 0   | 0   |         |
| 31542563  | Dnajc3       | dnaJ homolog subfamily C member 3 precursor                                                  | 5  | 2  | 6  | 13  | -0.09   | 0   | 1   | 1   | 2   | -0.35   |
| 157951606 | Dnajc8       | dnaJ homolog subfamily C member 8                                                            | 13 | 13 | 11 | 37  | 0.06    | 1   | 4   | 6   | 11  | 0.16 *  |
| 23956266  | Dnajc9       | dnaJ homolog subfamily C member 9                                                            | 21 | 20 | 23 | 64  | -0.24   | 15  | 27  | 35  | 77  | -0.08   |
| 6753670   | Dpm1         | dolichol-phosphate mannosyltransferase                                                       | 14 | 1  | 2  | 17  | -0.45   | 11  | 7   | 4   | 22  | -0.09   |
| 58037125  | Dpm3         | dolichol-phosphate mannosyltransferase subunit 3                                             | 1  | 1  | 0  | 2   | -0.38   | 1   | 0   | 0   | 1   | -0.61 # |
| 9966770   | Dolpp1       | dolichyldiphosphatase 1                                                                      | 2  | 0  | 0  | 2   | -0.21   | 1   | 0   | 0   | 1   | -0.08   |
| 309265149 | LOC100504754 | dolichyl-diphosphooligosaccharide--protein glycosyltransferase 48 kDa subunit-like isoform 1 | 19 | 24 | 18 | 61  | -0.30 * | 40  | 15  | 18  | 73  | -0.28 * |
| 282398108 | Rpn1         | dolichyl-diphosphooligosaccharide--protein glycosyltransferase subunit 1                     | 31 | 28 | 21 | 80  | -0.29   | 149 | 27  | 18  | 194 | -0.28 * |
| 34996495  | Rpn2         | dolichyl-diphosphooligosaccharide--protein glycosyltransferase subunit 2                     | 43 | 25 | 37 | 105 | -0.29   | 197 | 58  | 61  | 316 | -0.24 * |

|           |         |                                                                              |     |     |     |     |       |     |    |     |     |     |       |   |
|-----------|---------|------------------------------------------------------------------------------|-----|-----|-----|-----|-------|-----|----|-----|-----|-----|-------|---|
| 164518942 | Dad1    | dolichyl-diphosphooligosaccharide--protein glycosyltransferase subunit DAD1  | 4   | 4   | 4   | 12  | -0.33 | *   | 5  | 0   | 2   | 7   | -0.19 |   |
| 148747128 | Stt3a   | dolichyl-diphosphooligosaccharide--protein glycosyltransferase subunit STT3A | 3   | 1   | 0   | 4   | -0.38 |     | 2  | 0   | 0   | 2   | 1.61  | # |
| 61651673  | Stt3b   | dolichyl-diphosphooligosaccharide--protein glycosyltransferase subunit STT3B | 0   | 5   | 3   | 8   | -0.39 |     | 1  | 3   | 1   | 5   | 0.24  |   |
| 21728372  | Alg5    | dolichyl-phosphate beta-glucosyltransferase                                  | 1   | 0   | 0   | 1   | -0.36 |     | 0  | 0   | 0   | 0   |       |   |
| 255003748 | Alg3    | dolichyl-P-Man:Man(5)GlcNAc(2)-PP-dolichyl mannosyltransferase               | 1   | 0   | 0   | 1   | -0.29 |     | 0  | 0   | 0   | 0   |       |   |
| 9055282   | Mre11a  | double-strand break repair protein MRE11A                                    | 13  | 19  | 8   | 40  | 0.61  | *,# | 0  | 1   | 1   | 2   | 0.38  |   |
| 254692855 | Rad21   | double-strand-break repair protein rad21 homolog                             | 47  | 48  | 40  | 135 | 0.36  | *   | 31 | 66  | 65  | 162 | 0.24  | * |
| 226371684 | Adar    | double-stranded RNA-specific adenosine deaminase isoform 2                   | 1   | 2   | 3   | 6   | -0.16 |     | 0  | 0   | 0   | 0   |       |   |
| 67625743  | Adarb1  | double-stranded RNA-specific editase 1 isoform 1                             | 3   | 10  | 6   | 19  | 0.19  | *   | 0  | 0   | 1   | 1   | -0.23 |   |
| 261245007 | Dpy19l2 | dpy-19-like 2                                                                | 0   | 0   | 0   | 0   |       |     | 0  | 1   | 0   | 1   | -9.93 | # |
| 21313424  | Drap1   | dr1-associated corepressor                                                   | 5   | 7   | 5   | 17  | 0.03  |     | 0  | 2   | 1   | 3   | 0.64  | # |
| 226423873 | Dbnl    | drebrin-like protein isoform 3                                               | 16  | 11  | 13  | 40  | 0.17  |     | 0  | 0   | 0   | 0   |       |   |
| 13384676  | Dtd1    | D-tyrosyl-tRNA(Tyr) deacylase 1                                              | 4   | 2   | 2   | 8   | -0.12 |     | 0  | 0   | 0   | 0   |       |   |
| 6678794   | Map2k1  | dual specificity mitogen-activated protein kinase kinase 1                   | 0   | 0   | 1   | 1   | -0.42 |     | 0  | 0   | 4   | 4   | -0.02 |   |
| 31560267  | Map2k2  | dual specificity mitogen-activated protein kinase kinase 2                   | 0   | 0   | 0   | 0   |       |     | 0  | 1   | 0   | 1   | -1.04 | # |
| 22094081  | Map2k3  | dual specificity mitogen-activated protein kinase kinase 3                   | 0   | 0   | 0   | 0   |       |     | 0  | 1   | 1   | 2   | -0.17 |   |
| 24418935  | Dyrk1a  | dual specificity tyrosine-phosphorylation-regulated kinase 1A                | 0   | 0   | 0   | 0   |       |     | 3  | 0   | 1   | 4   | -2.06 | # |
| 311893360 | Dctn1   | dynactin subunit 1 isoform 3                                                 | 11  | 10  | 9   | 30  | 0.23  | *   | 0  | 0   | 0   | 0   |       |   |
| 28076935  | Dctn2   | dynactin subunit 2 isoform 3                                                 | 12  | 12  | 8   | 32  | 0.26  |     | 1  | 1   | 1   | 3   | 0.14  |   |
| 227116273 | Dctn3   | dynactin subunit 3 isoform A                                                 | 3   | 2   | 1   | 6   | 0.12  |     | 0  | 1   | 0   | 1   | -0.21 |   |
| 188219518 | Dctn5   | dynactin subunit 5                                                           | 0   | 2   | 1   | 3   | 0.04  |     | 0  | 0   | 0   | 0   |       |   |
| 6756009   | Dctn6   | dynactin subunit 6                                                           | 1   | 1   | 0   | 2   | 0.75  | #   | 0  | 0   | 0   | 0   |       |   |
| 87299637  | Dnm2    | dynamamin-2                                                                  | 0   | 0   | 0   | 0   |       |     | 0  | 0   | 3   | 3   | -0.70 | # |
| 27369922  | Dnm3    | dynamamin-3 isoform 2                                                        | 0   | 0   | 0   | 0   |       |     | 0  | 1   | 0   | 1   | 0.59  | # |
| 36796741  | Dnmbp   | dynamamin-binding protein                                                    | 0   | 1   | 0   | 1   | 7.84  | #   | 0  | 0   | 0   | 0   |       |   |
| 19526960  | Opa1    | dynamamin-like 120 kDa protein, mitochondrial isoform 2 precursor            | 1   | 0   | 0   | 1   | 1.76  | #   | 0  | 0   | 0   | 0   |       |   |
| 213688406 | Dynll1  | dynein light chain 1, cytoplasmic                                            | 31  | 23  | 30  | 84  | 0.10  |     | 12 | 11  | 10  | 33  | 0.12  |   |
| 281182473 | Dynll2  | dynein light chain 2, cytoplasmic                                            | 21  | 18  | 20  | 59  | 0.19  |     | 5  | 5   | 5   | 15  | 0.25  | * |
| 254540041 | Dynlrb1 | dynein light chain roadblock-type 1                                          | 6   | 8   | 6   | 20  | 0.13  |     | 0  | 0   | 0   | 0   |       |   |
| 262231811 | Dynlt1f | dynein light chain Tctex-type 1F                                             | 8   | 4   | 13  | 25  | 0.30  |     | 0  | 0   | 0   | 0   |       |   |
| 111154082 | Dst     | dystonin isoform a                                                           | 0   | 3   | 1   | 4   | 0.67  | #   | 0  | 0   | 0   | 0   |       |   |
| 94421034  | Ep300   | E1A binding protein p300                                                     | 5   | 13  | 10  | 28  | 0.55  | *   | 0  | 0   | 0   | 0   |       |   |
| 190194425 | Ep400   | E1A-binding protein p400 isoform 2                                           | 15  | 61  | 22  | 98  | 0.44  | *   | 0  | 2   | 5   | 7   | 0.34  |   |
| 161353508 | Cbx4    | E3 SUMO-protein ligase CBX4                                                  | 1   | 0   | 0   | 1   | -0.13 |     | 0  | 0   | 0   | 0   |       |   |
| 257196205 | Nsmce2  | E3 SUMO-protein ligase NSE2 isoform 1                                        | 9   | 0   | 7   | 16  | -0.05 |     | 0  | 0   | 5   | 5   | -0.12 |   |
| 257196207 | Nsmce2  | E3 SUMO-protein ligase NSE2 isoform 2                                        | 0   | 7   | 0   | 7   | -0.06 |     | 0  | 7   | 2   | 9   | -0.05 |   |
| 31543478  | Pias1   | E3 SUMO-protein ligase PIAS1                                                 | 1   | 0   | 0   | 1   | -0.56 |     | 0  | 0   | 0   | 0   |       |   |
| 255918221 | Pias2   | E3 SUMO-protein ligase PIAS2 isoform 5                                       | 0   | 0   | 0   | 0   |       |     | 0  | 0   | 1   | 1   | -0.36 |   |
| 124249349 | Pias4   | E3 SUMO-protein ligase PIAS4                                                 | 1   | 4   | 2   | 7   | -0.87 | #   | 0  | 1   | 0   | 1   | 0.36  |   |
| 153792534 | Ranbp2  | E3 SUMO-protein ligase RanBP2                                                | 111 | 204 | 101 | 416 | 0.30  | *   | 50 | 154 | 181 | 385 | -0.01 |   |
| 145207948 | Trim25  | E3 ubiquitin/ISG15 ligase TRIM25                                             | 1   | 0   | 0   | 1   | -0.05 |     | 0  | 0   | 0   | 0   |       |   |
| 33859829  | Rnf20   | E3 ubiquitin-protein ligase BRE1A                                            | 9   | 7   | 7   | 23  | 0.38  | *   | 0  | 0   | 0   | 0   |       |   |
| 229093990 | Rnf40   | E3 ubiquitin-protein ligase BRE1B                                            | 5   | 3   | 5   | 13  | 0.31  |     | 0  | 0   | 0   | 0   |       |   |



|           |               |                                                                                   |     |     |     |     |         |  |     |     |     |     |        |
|-----------|---------------|-----------------------------------------------------------------------------------|-----|-----|-----|-----|---------|--|-----|-----|-----|-----|--------|
| 133930784 | Dtx3l         | E3 ubiquitin-protein ligase DTX3L                                                 | 3   | 5   | 0   | 8   | 0.39    |  | 0   | 0   | 0   | 0   |        |
| 256773303 | March5        | E3 ubiquitin-protein ligase MARCH5 isoform 3                                      | 1   | 0   | 0   | 1   | 0.82#   |  | 0   | 0   | 0   | 0   |        |
| 56699423  | Nedd4         | E3 ubiquitin-protein ligase NEDD4                                                 | 1   | 2   | 3   | 6   | -0.76*# |  | 0   | 1   | 8   | 9   | -0.28  |
| 163937858 | Rbbp6         | E3 ubiquitin-protein ligase RBBP6 isoform 1                                       | 4   | 18  | 0   | 22  | 0.32    |  | 0   | 1   | 2   | 3   | 0.19   |
| 226958428 | Ring1         | E3 ubiquitin-protein ligase RING1                                                 | 12  | 13  | 10  | 35  | 0.09    |  | 0   | 13  | 5   | 18  | 0.09   |
| 33563274  | Rnf2          | E3 ubiquitin-protein ligase RING2                                                 | 19  | 29  | 17  | 65  | 0.13    |  | 4   | 18  | 14  | 36  | 0.18   |
| 47078289  | Rlim          | E3 ubiquitin-protein ligase RLIM                                                  | 0   | 0   | 0   | 0   |         |  | 0   | 0   | 1   | 1   | 0.08   |
| 169790808 | Rnf168        | E3 ubiquitin-protein ligase RNF168                                                | 0   | 1   | 0   | 1   | -1.65#  |  | 0   | 0   | 0   | 0   |        |
| 21311909  | Rnf6          | E3 ubiquitin-protein ligase RNF6                                                  | 0   | 0   | 0   | 0   |         |  | 0   | 1   | 1   | 2   | 0.02   |
| 118150662 | Shprh         | E3 ubiquitin-protein ligase SHPRH isoform a                                       | 0   | 1   | 0   | 1   | 0.05    |  | 0   | 0   | 0   | 0   |        |
| 118150666 | Shprh         | E3 ubiquitin-protein ligase SHPRH isoform b                                       | 3   | 1   | 0   | 4   | 5.05#   |  | 0   | 0   | 0   | 0   |        |
| 119637830 | Trim33        | E3 ubiquitin-protein ligase TRIM33 isoform 2                                      | 0   | 1   | 2   | 3   | 0.49*   |  | 0   | 0   | 0   | 0   |        |
| 124358936 | Trim41        | E3 ubiquitin-protein ligase TRIM41                                                | 0   | 0   | 0   | 0   |         |  | 0   | 1   | 5   | 6   | -0.04  |
| 41235779  | Trim56        | E3 ubiquitin-protein ligase TRIM56                                                | 0   | 2   | 2   | 4   | -0.13   |  | 0   | 0   | 1   | 1   | 0.05   |
| 163310753 | Ubr5          | E3 ubiquitin-protein ligase UBR5 isoform 2                                        | 0   | 0   | 0   | 0   |         |  | 0   | 0   | 1   | 1   | 0.58#  |
| 161621269 | Uhrf1         | E3 ubiquitin-protein ligase UHRF1 isoform A                                       | 15  | 19  | 0   | 34  | 0.08    |  | 85  | 58  | 62  | 205 | 0.01   |
| 161621273 | Uhrf1         | E3 ubiquitin-protein ligase UHRF1 isoform B                                       | 2   | 1   | 7   | 10  | -0.52   |  | 0   | 11  | 21  | 32  | -0.12  |
| 124430766 | Uhrf2         | E3 ubiquitin-protein ligase UHRF2                                                 | 0   | 0   | 0   | 0   |         |  | 0   | 4   | 10  | 14  | -0.19  |
| 90669983  | Zfp91         | E3 ubiquitin-protein ligase ZFP91                                                 | 6   | 2   | 1   | 9   | 0.11    |  | 0   | 2   | 2   | 4   | 0.32   |
| 167234435 | Eml4          | echinoderm microtubule-associated protein-like 4 1                                | 5   | 1   | 4   | 10  | 0.50    |  | 0   | 0   | 0   | 0   |        |
| 71061462  | Entpd5        | ectonucleoside triphosphate diphosphohydrolase 5 isoform b                        | 1   | 0   | 0   | 1   | -0.48   |  | 0   | 0   | 0   | 0   |        |
| 27477043  | Efha1         | EF-hand domain-containing family member A1                                        | 2   | 2   | 4   | 8   | -0.03   |  | 0   | 0   | 0   | 0   |        |
| 13386360  | Efhd1         | EF-hand domain-containing protein D1                                              | 0   | 0   | 0   | 0   |         |  | 0   | 1   | 3   | 4   | 1.33#  |
| 31981086  | Efhd2         | EF-hand domain-containing protein D2                                              | 3   | 0   | 1   | 4   | 0.99#   |  | 0   | 0   | 5   | 5   | 0.11   |
| 7106303   | Ehd1          | EH domain-containing protein 1                                                    | 0   | 1   | 3   | 4   | -0.06   |  | 0   | 1   | 2   | 3   | -0.18  |
| 31981592  | Ehd4          | EH domain-containing protein 4                                                    | 2   | 7   | 2   | 11  | -0.14   |  | 0   | 5   | 8   | 13  | 0.24   |
| 31542602  | Elavl1        | ELAV-like protein 1                                                               | 86  | 107 | 95  | 288 | -0.12   |  | 171 | 125 | 123 | 419 | -0.06  |
| 227500281 | Etfa          | electron transfer flavoprotein subunit alpha, mitochondrial precursor             | 28  | 24  | 37  | 89  | -0.11   |  | 7   | 18  | 30  | 55  | 0.00   |
| 38142460  | Etfb          | electron transfer flavoprotein subunit beta                                       | 32  | 20  | 28  | 80  | -0.15   |  | 0   | 11  | 7   | 18  | -0.12  |
| 254588014 | Etfdh         | electron transfer flavoprotein-ubiquinone oxidoreductase, mitochondrial precursor | 2   | 0   | 0   | 2   | -0.04   |  | 0   | 1   | 1   | 2   | -0.26  |
| 255003740 | 1200014J11Rik | ELG protein                                                                       | 4   | 4   | 6   | 14  | 0.18    |  | 11  | 15  | 16  | 42  | 0.05   |
| 120300971 | Erc1          | ELKS/Rab6-interacting/CAST family member 1 isoform 1                              | 1   | 0   | 0   | 1   | 0.70#   |  | 0   | 0   | 0   | 0   |        |
| 126032329 | Eef1a1        | elongation factor 1-alpha 1                                                       | 177 | 222 | 202 | 601 | 0.02    |  | 251 | 283 | 357 | 891 | 0.02   |
| 31980922  | Eef1b2        | elongation factor 1-beta                                                          | 14  | 29  | 24  | 67  | 0.01    |  | 2   | 9   | 14  | 25  | 0.11   |
| 54287684  | Eef1d         | elongation factor 1-delta isoform b                                               | 35  | 41  | 45  | 121 | -0.03   |  | 7   | 25  | 17  | 49  | -0.01  |
| 110625979 | Eef1g         | elongation factor 1-gamma                                                         | 21  | 62  | 52  | 135 | -0.06   |  | 2   | 23  | 23  | 48  | 0.11   |
| 33859482  | Eef2          | elongation factor 2                                                               | 59  | 59  | 56  | 174 | -0.12   |  | 83  | 151 | 349 | 583 | -0.04  |
| 21313468  | Tsfm          | elongation factor Ts, mitochondrial precursor                                     | 25  | 39  | 15  | 79  | -0.13   |  | 1   | 11  | 10  | 22  | -0.09  |
| 227908782 | Eftud1        | elongation factor Tu GTP-binding domain-containing protein 1                      | 0   | 0   | 0   | 0   |         |  | 0   | 0   | 1   | 1   | -0.81# |
| 27370092  | Tufm          | elongation factor Tu, mitochondrial isoform 1                                     | 10  | 0   | 14  | 24  | -0.12*  |  | 5   | 28  | 37  | 70  | -0.10  |
| 254911131 | Tufm          | elongation factor Tu, mitochondrial isoform 2                                     | 0   | 13  | 0   | 13  | -0.26   |  | 0   | 1   | 1   | 2   | -0.39  |

|           |              |                                                                          |    |    |    |     |          |    |    |    |     |         |
|-----------|--------------|--------------------------------------------------------------------------|----|----|----|-----|----------|----|----|----|-----|---------|
| 85702351  | Elov1        | elongation of very long chain fatty acids protein 1 isoform 2            | 4  | 2  | 1  | 7   | -0.42 *  | 6  | 1  | 0  | 7   | -1.04 # |
| 18496985  | Elov6        | elongation of very long chain fatty acids protein 6                      | 4  | 1  | 1  | 6   | -0.50    | 0  | 0  | 0  | 0   |         |
| 6679641   | Emd          | emerin                                                                   | 0  | 1  | 0  | 1   | -0.20    | 2  | 7  | 6  | 15  | 0.09    |
| 18079312  | Emid1        | EMI domain-containing protein 1 precursor                                | 0  | 0  | 0  | 0   |          | 0  | 0  | 2  | 2   | -8.50 # |
| 21553119  | Emilin2      | EMILIN-2 precursor                                                       | 0  | 0  | 0  | 0   |          | 0  | 1  | 0  | 1   | 8.12 #  |
| 22094129  | Neil1        | endonuclease 8-like 1                                                    | 0  | 1  | 0  | 1   | -10.16 # | 0  | 0  | 0  | 0   |         |
| 6679647   | Endog        | endonuclease G, mitochondrial precursor                                  | 6  | 11 | 6  | 23  | 0.21     | 0  | 0  | 0  | 0   |         |
| 227908769 | Nth1         | endonuclease III-like protein 1                                          | 6  | 2  | 4  | 12  | -0.05    | 3  | 10 | 12 | 25  | -0.08   |
| 124487057 | Ermp1        | endoplasmic reticulum metalloproteinase 1                                | 9  | 0  | 3  | 12  | -0.43    | 14 | 0  | 1  | 15  | -0.48 # |
| 19526463  | Erp29        | endoplasmic reticulum resident protein 29 precursor                      | 30 | 16 | 22 | 68  | -0.05    | 1  | 4  | 5  | 10  | 0.24    |
| 19072792  | Erp44        | endoplasmic reticulum resident protein 44 precursor                      | 2  | 0  | 2  | 4   | -0.20    | 0  | 0  | 0  | 0   |         |
| 13384938  | Ergic3       | endoplasmic reticulum-Golgi intermediate compartment protein 3           | 1  | 0  | 0  | 1   | -0.04    | 0  | 0  | 0  | 0   |         |
| 6755863   | Hsp90b1      | endoplasmic reticulum chaperone protein                                  | 33 | 1  | 7  | 41  | -0.20    | 62 | 26 | 73 | 161 | -0.15   |
| 309262489 | Gm11964      | endothelial differentiation-related factor 1-like                        | 9  | 9  | 9  | 27  | -0.02    | 0  | 3  | 2  | 5   | 0.10    |
| 255683297 | Elmo3        | engulfment and cell motility protein 3                                   | 3  | 8  | 3  | 14  | -0.09    | 0  | 0  | 0  | 0   |         |
| 31712002  | Edc4         | enhancer of mRNA-decapping protein 4                                     | 0  | 1  | 1  | 2   | -0.73 #  | 0  | 0  | 0  | 0   |         |
| 157042787 | Epc2         | enhancer of polycomb homolog 2                                           | 0  | 2  | 0  | 2   | 0.37     | 0  | 0  | 0  | 0   |         |
| 149258586 | Gm10131      | enhancer of rudimentary homolog                                          | 22 | 21 | 23 | 66  | -0.06    | 48 | 16 | 7  | 71  | 0.08    |
| 30023855  | Eny2         | enhancer of yellow 2 transcription factor homolog                        | 3  | 5  | 3  | 11  | -0.10    | 2  | 1  | 4  | 7   | -0.29   |
| 158854022 | Echdc1       | enoyl-CoA hydratase domain-containing protein 1 isoform b                | 0  | 0  | 0  | 0   |          | 0  | 1  | 1  | 2   | 0.10    |
| 225543400 | Echdc2       | enoyl-CoA hydratase domain-containing protein 2, mitochondrial precursor | 3  | 1  | 2  | 6   | -0.14 *  | 0  | 0  | 0  | 0   |         |
| 31980955  | Echdc3       | enoyl-CoA hydratase domain-containing protein 3, mitochondrial precursor | 3  | 0  | 3  | 6   | -0.36    | 0  | 0  | 0  | 0   |         |
| 29789289  | Echs1        | enoyl-CoA hydratase, mitochondrial precursor                             | 39 | 38 | 35 | 112 | -0.09    | 1  | 13 | 7  | 21  | 0.07    |
| 21312210  | Eci3         | enoyl-Coenzyme A delta isomerase 3                                       | 0  | 0  | 2  | 2   | -0.24    | 0  | 0  | 0  | 0   |         |
| 159110787 | Mtap7        | ensconsin isoform 1                                                      | 0  | 0  | 1  | 1   | -0.05    | 0  | 0  | 0  | 0   |         |
| 111185907 | Evpl         | envoplakin                                                               | 3  | 8  | 8  | 19  | 0.87 *,# | 0  | 0  | 0  | 0   |         |
| 6681283   | Egfr         | epidermal growth factor receptor isoform 2                               | 0  | 0  | 0  | 0   |          | 0  | 0  | 1  | 1   | 0.08    |
| 12963667  | Npc2         | epididymal secretory protein E1 precursor                                | 3  | 1  | 4  | 8   | 0.00     | 0  | 0  | 0  | 0   |         |
| 227330625 | Man2b2       | epididymis-specific alpha-mannosidase precursor                          | 2  | 0  | 1  | 3   | -1.48 #  | 0  | 0  | 0  | 0   |         |
| 131889222 | Sdr39u1      | epimerase family protein SDR39U1                                         | 1  | 1  | 2  | 4   | -0.25    | 0  | 1  | 2  | 3   | -0.19   |
| 37537522  | Eppk1        | epiplakin                                                                | 0  | 6  | 1  | 7   | 0.50     | 5  | 16 | 2  | 23  | 0.22    |
| 112293275 | Epcam        | epithelial cell adhesion molecule                                        | 8  | 0  | 11 | 19  | -0.15    | 7  | 6  | 21 | 34  | 0.01    |
| 165972311 | Esrp1        | epithelial splicing regulatory protein 1                                 | 5  | 10 | 4  | 19  | 0.09     | 0  | 2  | 1  | 3   | 0.02    |
| 28849887  | Esrp2        | epithelial splicing regulatory protein 2                                 | 0  | 3  | 5  | 8   | 0.32 *   | 0  | 0  | 0  | 0   |         |
| 33468893  | Epn2         | epsin-2                                                                  | 2  | 0  | 0  | 2   | 0.71 #   | 0  | 0  | 0  | 0   |         |
| 30794400  | Epn3         | epsin-3                                                                  | 0  | 0  | 1  | 1   | 1.94 #   | 0  | 0  | 0  | 0   |         |
| 19527170  | Kdelr1       | ER lumen protein retaining receptor 1                                    | 0  | 0  | 0  | 0   |          | 1  | 0  | 0  | 1   | -0.11   |
| 13385318  | Kdelr2       | ER lumen protein retaining receptor 2                                    | 0  | 0  | 0  | 0   |          | 1  | 0  | 0  | 1   | -0.18   |
| 33859765  | Eri3         | ERI1 exoribonuclease 3                                                   | 0  | 1  | 0  | 1   | 0.38     | 0  | 0  | 1  | 1   | 9.76 #  |
| 256355015 | Erlin1       | erlin-1                                                                  | 0  | 0  | 0  | 0   |          | 14 | 6  | 16 | 36  | -0.37 * |
| 23956396  | Erlin2       | erlin-2                                                                  | 6  | 5  | 0  | 11  | -0.54    | 50 | 26 | 41 | 117 | -0.34 * |
| 7657067   | Ero1l        | ERO1-like protein alpha precursor                                        | 9  | 1  | 3  | 13  | 0.24     | 0  | 0  | 2  | 2   | 0.24    |
| 149274885 | LOC100046684 | ES1 protein homolog, mitochondrial-like isoform 1                        | 6  | 10 | 6  | 22  | -0.14    | 0  | 3  | 0  | 3   | -0.41   |
| 149274887 | LOC100046684 | ES1 protein homolog, mitochondrial-like isoform 2                        | 0  | 0  | 0  | 0   |          | 4  | 0  | 5  | 9   | -0.08   |

|           |              |                                                                     |    |    |    |    |           |    |    |     |     |         |
|-----------|--------------|---------------------------------------------------------------------|----|----|----|----|-----------|----|----|-----|-----|---------|
| 124487344 | Esf1         | ESF1 homolog                                                        | 0  | 0  | 2  | 2  | 0.05      | 0  | 6  | 9   | 15  | 0.03    |
| 16716597  | Hsd17b11     | estradiol 17-beta-dehydrogenase 11                                  | 7  | 1  | 0  | 8  | -0.06     | 0  | 1  | 1   | 2   | -0.25   |
| 9789991   | Hsd17b12     | estradiol 17-beta-dehydrogenase 12                                  | 36 | 31 | 24 | 91 | -0.27     | 12 | 22 | 10  | 44  | -0.22   |
| 157951743 | H2-Ke6       | estradiol 17-beta-dehydrogenase 8                                   | 21 | 30 | 20 | 71 | -0.23     | 0  | 1  | 1   | 2   | -0.56 # |
| 6681289   | Ei24         | etoposide-induced protein 2.4                                       | 1  | 0  | 1  | 2  | -7.59 #   | 0  | 0  | 0   | 0   |         |
| 6681287   | Ehf          | ETS homologous factor                                               | 3  | 3  | 3  | 9  | -0.08     | 0  | 0  | 1   | 1   | 0.26    |
| 6679627   | Elf1         | ETS-related transcription factor Elf-1                              | 1  | 7  | 5  | 13 | 0.46      | 0  | 0  | 0   | 0   |         |
| 12963705  | Elf2         | ETS-related transcription factor Elf-2                              | 0  | 4  | 0  | 4  | -0.05     | 0  | 0  | 0   | 0   |         |
| 253683411 | Elf3         | ETS-related transcription factor Elf-3 isoform 1                    | 2  | 6  | 3  | 11 | 1.19 *,#  | 0  | 1  | 0   | 1   | 1.14 #  |
| 21450625  | Eif4a1       | eukaryotic initiation factor 4A-I isoform 1                         | 0  | 19 | 26 | 45 | 0.01      | 0  | 79 | 85  | 164 | -0.14   |
| 226823309 | Eif4a1       | eukaryotic initiation factor 4A-I isoform 2                         | 12 | 0  | 0  | 12 | 0.02      | 54 | 0  | 43  | 97  | 0.22    |
| 176865892 | Eif4a2       | eukaryotic initiation factor 4A-II isoform a                        | 0  | 7  | 20 | 27 | -0.49     | 0  | 12 | 0   | 12  | -0.29   |
| 176866061 | Eif4a2       | eukaryotic initiation factor 4A-II isoform c                        | 9  | 0  | 0  | 9  | 0.07      | 0  | 0  | 65  | 65  | -0.02   |
| 20149756  | Eif4a3       | eukaryotic initiation factor 4A-III                                 | 14 | 12 | 30 | 56 | 0.12      | 75 | 76 | 145 | 296 | 0.00    |
| 82902181  | Gm5576       | eukaryotic initiation factor 4A-III-like                            | 9  | 22 | 30 | 61 | 0.10      | 94 | 84 | 202 | 380 | 0.02    |
| 309265677 | LOC100504817 | eukaryotic initiation factor 4A-III-like                            | 0  | 0  | 0  | 0  |           | 0  | 9  | 0   | 9   | 0.09    |
| 124286826 | Etf1         | eukaryotic peptide chain release factor subunit 1                   | 13 | 12 | 10 | 35 | -0.01     | 0  | 1  | 5   | 6   | 0.12    |
| 22165347  | Eif1         | eukaryotic translation initiation factor 1                          | 15 | 6  | 0  | 21 | 0.12      | 0  | 0  | 0   | 0   |         |
| 158631225 | Eif1a        | eukaryotic translation initiation factor 1A                         | 3  | 4  | 0  | 7  | 0.00      | 1  | 0  | 0   | 1   | 0.05    |
| 31541824  | Eif1ax       | eukaryotic translation initiation factor 1A, X-chromosomal          | 7  | 4  | 2  | 13 | -0.13     | 0  | 0  | 0   | 0   |         |
| 21312159  | Eif1b        | eukaryotic translation initiation factor 1b                         | 8  | 0  | 0  | 8  | -0.11     | 0  | 0  | 0   | 0   |         |
| 13385624  | Eif2s1       | eukaryotic translation initiation factor 2 subunit 1                | 29 | 37 | 23 | 89 | -0.14     | 2  | 12 | 24  | 38  | -0.12   |
| 14149756  | Eif2s2       | eukaryotic translation initiation factor 2 subunit 2                | 13 | 10 | 12 | 35 | -0.07     | 0  | 0  | 0   | 0   |         |
| 149258752 | Gm9892       | eukaryotic translation initiation factor 2 subunit 2-like isoform 1 | 0  | 0  | 0  | 0  |           | 0  | 0  | 2   | 2   | 0.14    |
| 309267251 | Gm2223       | eukaryotic translation initiation factor 2 subunit 3-like           | 16 | 18 | 16 | 50 | -0.10     | 1  | 11 | 11  | 23  | 0.22    |
| 54020676  | Eif2a        | eukaryotic translation initiation factor 2A                         | 7  | 4  | 1  | 12 | 0.05      | 0  | 0  | 1   | 1   | -0.26   |
| 229577222 | Eif2d        | eukaryotic translation initiation factor 2D isoform 2               | 0  | 1  | 1  | 2  | -0.07     | 0  | 0  | 0   | 0   |         |
| 146219837 | Eif3a        | eukaryotic translation initiation factor 3 subunit A                | 1  | 4  | 3  | 8  | 0.12      | 0  | 1  | 11  | 12  | -0.29   |
| 29789343  | Eif3b        | eukaryotic translation initiation factor 3 subunit B                | 0  | 0  | 3  | 3  | 0.18      | 0  | 0  | 6   | 6   | -0.19   |
| 125628629 | Eif3d        | eukaryotic translation initiation factor 3 subunit D                | 0  | 1  | 1  | 2  | 0.05      | 0  | 1  | 1   | 2   | -0.21   |
| 45476573  | Eif3e        | eukaryotic translation initiation factor 3 subunit E                | 0  | 0  | 0  | 0  |           | 1  | 2  | 3   | 6   | -0.95 # |
| 225637531 | Eif3f        | eukaryotic translation initiation factor 3 subunit F                | 3  | 3  | 2  | 8  | 0.13      | 0  | 0  | 3   | 3   | 0.00    |
| 18079341  | Eif3h        | eukaryotic translation initiation factor 3 subunit H                | 2  | 1  | 1  | 4  | 0.20      | 8  | 6  | 15  | 29  | 0.01    |
| 9055370   | Eif3i        | eukaryotic translation initiation factor 3 subunit I                | 2  | 0  | 1  | 3  | -0.22     | 0  | 3  | 2   | 5   | -0.26   |
| 21312044  | Eif3k        | eukaryotic translation initiation factor 3 subunit K                | 2  | 2  | 3  | 7  | -0.03     | 0  | 3  | 4   | 7   | -0.37   |
| 51093840  | Eif3l        | eukaryotic translation initiation factor 3 subunit L                | 0  | 0  | 0  | 0  |           | 1  | 4  | 10  | 15  | -0.21   |
| 21703762  | Eif3m        | eukaryotic translation initiation factor 3 subunit M                | 0  | 1  | 0  | 1  | 2.77 #    | 0  | 2  | 3   | 5   | -0.34   |
| 167234372 | Eif4b        | eukaryotic translation initiation factor 4B                         | 25 | 17 | 13 | 55 | -0.87 *,# | 6  | 8  | 7   | 21  | -0.43   |
| 83627717  | Eif4e        | eukaryotic translation initiation factor 4E                         | 3  | 1  | 1  | 5  | 0.16      | 0  | 0  | 0   | 0   |         |
| 85677506  | Eif4e2       | eukaryotic translation initiation factor 4E type 2 isoform 3        | 0  | 0  | 0  | 0  |           | 0  | 0  | 3   | 3   | 0.41    |

|           |              |                                                           |     |     |     |     |           |     |     |     |     |         |
|-----------|--------------|-----------------------------------------------------------|-----|-----|-----|-----|-----------|-----|-----|-----|-----|---------|
| 15808988  | Eif4h        | eukaryotic translation initiation factor 4H               | 10  | 9   | 7   | 26  | 0.01      | 0   | 1   | 0   | 1   | 0.40    |
| 262359885 | Eif5a        | eukaryotic translation initiation factor 5A-1             | 17  | 27  | 16  | 60  | -0.11     | 0   | 7   | 10  | 17  | -0.10   |
| 29243942  | Eif5a2       | eukaryotic translation initiation factor 5A-2             | 0   | 0   | 0   | 0   |           | 15  | 0   | 0   | 15  | 0.08    |
| 84043961  | Eif5b        | eukaryotic translation initiation factor 5B               | 8   | 21  | 9   | 38  | 0.14      | 0   | 0   | 0   | 0   |         |
| 149261435 | LOC100047658 | eukaryotic translation initiation factor 5-like isoform 1 | 1   | 2   | 1   | 4   | -0.14     | 3   | 2   | 6   | 11  | -0.57 # |
| 27501448  | Eif6         | eukaryotic translation initiation factor 6                | 6   | 15  | 13  | 34  | -0.18     | 24  | 30  | 26  | 80  | 0.13    |
| 309266187 | LOC100503956 | EVI5-like protein-like isoform 2                          | 0   | 0   | 0   | 0   |           | 0   | 1   | 0   | 1   | 10.07 # |
| 83921574  | Exoc4        | exocyst complex component 4                               | 1   | 0   | 2   | 3   | -0.20     | 0   | 1   | 6   | 7   | 0.43    |
| 30794378  | Exosc6       | exosome complex exonuclease MTR3                          | 12  | 15  | 9   | 36  | 0.09      | 0   | 3   | 5   | 8   | -0.08   |
| 21450259  | Exosc2       | exosome complex exonuclease RRP4                          | 15  | 17  | 20  | 52  | 0.01      | 0   | 7   | 10  | 17  | 0.00    |
| 39930417  | Exosc3       | exosome complex exonuclease RRP40                         | 20  | 20  | 16  | 56  | 0.03      | 0   | 6   | 6   | 12  | 0.08    |
| 29611663  | Exosc4       | exosome complex exonuclease RRP41                         | 10  | 22  | 11  | 43  | -0.13     | 0   | 6   | 0   | 6   | -0.02   |
| 124487127 | Exosc7       | exosome complex exonuclease RRP42                         | 19  | 24  | 20  | 63  | 0.05      | 0   | 3   | 7   | 10  | 0.03    |
| 254692991 | Exosc8       | exosome complex exonuclease RRP43 isoform 2               | 16  | 17  | 21  | 54  | -0.02     | 0   | 6   | 6   | 12  | 0.09    |
| 145207992 | Dis3         | exosome complex exonuclease RRP44                         | 5   | 22  | 13  | 40  | 0.18      | 0   | 3   | 7   | 10  | 0.36    |
| 9506981   | Exosc9       | exosome complex exonuclease RRP45                         | 8   | 12  | 12  | 32  | -0.05     | 0   | 3   | 0   | 3   | 0.77 #  |
| 20070392  | Exosc5       | exosome complex exonuclease RRP46                         | 23  | 29  | 23  | 75  | -0.02     | 0   | 6   | 3   | 9   | 0.04    |
| 227116266 | Exosc10      | exosome component 10                                      | 8   | 20  | 7   | 35  | 0.04      | 0   | 7   | 7   | 14  | 0.23    |
| 38604071  | Xpo1         | exportin-1                                                | 0   | 2   | 1   | 3   | 0.33      | 3   | 57  | 73  | 133 | -0.17   |
| 12963737  | Cse1l        | exportin-2                                                | 0   | 0   | 0   | 0   |           | 17  | 31  | 103 | 151 | -0.16   |
| 24429570  | Xpo5         | exportin-5                                                | 0   | 0   | 0   | 0   |           | 2   | 11  | 25  | 38  | -0.20   |
| 12746422  | Xpo7         | exportin-7                                                | 0   | 1   | 1   | 2   | 0.27      | 0   | 2   | 6   | 8   | 1.31 #  |
| 33859650  | Esyt1        | extended synaptotagmin-1                                  | 2   | 0   | 1   | 3   | -0.11     | 0   | 0   | 1   | 1   | -0.30   |
| 67782360  | Esyt2        | extended synaptotagmin-2                                  | 2   | 3   | 1   | 6   | -0.72 *,# | 0   | 0   | 0   | 0   |         |
| 126157515 | Fras1        | extracellular matrix protein FRAS1 precursor              | 0   | 0   | 0   | 0   |           | 0   | 1   | 0   | 1   | 5.88 #  |
| 83921618  | Ezr          | ezrin                                                     | 30  | 45  | 69  | 144 | 0.15      | 13  | 30  | 32  | 75  | -0.17   |
| 309263097 | LOC100505120 | FACT complex subunit SPT16-like                           | 58  | 80  | 70  | 208 | -0.15     | 122 | 245 | 189 | 556 | -0.29   |
| 111154063 | Ssrp1        | FACT complex subunit SSRP1 isoform 1                      | 19  | 32  | 22  | 73  | -0.26     | 80  | 57  | 49  | 186 | -0.12   |
| 161086971 | Capza1       | F-actin-capping protein subunit alpha-1                   | 26  | 34  | 25  | 85  | 0.12      | 6   | 16  | 13  | 35  | 0.13    |
| 6671672   | Capza2       | F-actin-capping protein subunit alpha-2                   | 13  | 21  | 15  | 49  | 0.11      | 3   | 8   | 12  | 23  | 0.30    |
| 6753262   | Capzb        | F-actin-capping protein subunit beta isoform b            | 19  | 28  | 20  | 67  | 0.07      | 2   | 11  | 8   | 21  | 0.35    |
| 268370105 | Fam101b      | family with sequence similarity 101, member B             | 5   | 9   | 4   | 18  | 0.23      | 0   | 0   | 0   | 0   |         |
| 262073031 | Fam50a       | family with sequence similarity 50, member A              | 0   | 5   | 0   | 5   | 0.37      | 0   | 0   | 0   | 0   |         |
| 110625847 | Fam57a       | family with sequence similarity 57, member A              | 1   | 0   | 0   | 1   | -0.17     | 0   | 0   | 0   | 0   |         |
| 84993237  | Fam60a       | family with sequence similarity 60, member A              | 0   | 0   | 1   | 1   | 0.09      | 0   | 0   | 0   | 0   |         |
| 269914118 | Fam83h       | family with sequence similarity 83, member H              | 0   | 1   | 2   | 3   | -0.02     | 0   | 0   | 8   | 8   | 0.65 #  |
| 61098124  | Fam98b       | family with sequence similarity 98, member B              | 3   | 14  | 11  | 28  | 0.25      | 0   | 2   | 0   | 2   | 0.24    |
| 224922832 | Fubp3        | far upstream element (FUSE) binding protein 3             | 63  | 58  | 42  | 163 | -0.07     | 17  | 34  | 22  | 73  | -0.05   |
| 84662730  | Fubp1        | far upstream element-binding protein 1                    | 49  | 60  | 37  | 146 | 0.11      | 1   | 13  | 9   | 23  | 0.12    |
| 163954948 | Khsrp        | far upstream element-binding protein 2                    | 126 | 171 | 111 | 408 | 0.05      | 157 | 149 | 99  | 405 | 0.04    |
| 19882207  | Fdps         | farnesyl pyrophosphate synthase                           | 3   | 2   | 2   | 7   | -0.06     | 0   | 0   | 3   | 3   | 0.33    |
| 158533976 | Faf2         | FAS-associated factor 2                                   | 0   | 0   | 1   | 1   | -0.32     | 0   | 0   | 1   | 1   | -0.25   |
| 27369557  | Fastkd2      | FAST kinase domain-containing protein 2                   | 0   | 1   | 1   | 2   | -0.04     | 0   | 0   | 0   | 0   |         |
| 22164784  | Fads1        | fatty acid desaturase 1                                   | 4   | 0   | 0   | 4   | -1.17 #   | 1   | 0   | 2   | 3   | -0.65 # |
| 9790071   | Fads2        | fatty acid desaturase 2                                   | 4   | 0   | 0   | 4   | -0.11     | 0   | 0   | 1   | 1   | -0.48 # |
| 93102409  | Fasn         | fatty acid synthase                                       | 0   | 0   | 0   | 0   |           | 0   | 0   | 105 | 105 | -0.26   |
| 74096448  | Far1         | fatty acyl-CoA reductase 1                                | 1   | 0   | 0   | 1   | 0.58 #    | 0   | 0   | 1   | 1   | 1.06 #  |

|           |               |                                                                   |     |     |     |     |         |  |    |    |    |     |         |
|-----------|---------------|-------------------------------------------------------------------|-----|-----|-----|-----|---------|--|----|----|----|-----|---------|
| 75677435  | Aldh3a2       | fatty aldehyde dehydrogenase                                      | 3   | 0   | 3   | 6   | -0.22   |  | 1  | 3  | 2  | 6   | 0.14    |
| 226443015 | Faah          | fatty-acid amide hydrolase 1                                      | 0   | 0   | 0   | 0   |         |  | 1  | 0  | 0  | 1   | -0.60 # |
| 28201989  | Fbxo28        | F-box only protein 28                                             | 2   | 6   | 4   | 12  | 0.17    |  | 10 | 15 | 18 | 43  | 0.12    |
| 160333600 | Fbxo38        | F-box only protein 38                                             | 1   | 6   | 1   | 8   | 0.28 *  |  | 0  | 4  | 8  | 12  | 0.41    |
| 256665259 | Fbxo4         | F-box only protein 4                                              | 0   | 0   | 0   | 0   |         |  | 1  | 0  | 0  | 1   | 1.86 #  |
| 120407054 | Fbxw8         | F-box/WD repeat-containing protein 8                              | 0   | 0   | 0   | 0   |         |  | 0  | 0  | 1  | 1   | -0.72 # |
| 33468969  | Tbl1x         | F-box-like/WD repeat-containing protein TBL1X                     | 2   | 2   | 2   | 6   | 1.85 #  |  | 0  | 0  | 0  | 0   |         |
| 31543001  | Tbl1xr1       | F-box-like/WD repeat-containing protein TBL1XR1                   | 10  | 9   | 11  | 30  | 0.43 *  |  | 0  | 4  | 4  | 8   | 0.47 #  |
| 164698444 | Frrs1         | ferric-chelate reductase 1                                        | 0   | 0   | 1   | 1   | -0.23   |  | 0  | 0  | 0  | 0   |         |
| 6753912   | Fth1          | ferritin heavy chain                                              | 1   | 0   | 0   | 1   | 0.61 #  |  | 0  | 0  | 0  | 0   |         |
| 114326466 | Ftl1          | ferritin light chain 1                                            | 18  | 7   | 19  | 44  | 0.09    |  | 0  | 2  | 9  | 11  | 0.23    |
| 20452466  | Fech          | ferrochelatase, mitochondrial                                     | 3   | 4   | 4   | 11  | -0.15   |  | 0  | 0  | 0  | 0   |         |
| 47777353  | Fgfr1op       | FGFR1 oncogene partner isoform 2                                  | 0   | 0   | 1   | 1   | -0.24   |  | 0  | 0  | 0  | 0   |         |
| 83745139  | Fndc3a        | fibronectin type-III domain-containing protein 3A                 | 0   | 0   | 3   | 3   | -0.08   |  | 0  | 0  | 0  | 0   |         |
| 125347376 | Flna          | filamin-A                                                         | 80  | 73  | 46  | 199 | 0.23    |  | 0  | 0  | 0  | 0   |         |
| 145966915 | Flnb          | filamin-B                                                         | 158 | 179 | 130 | 467 | 0.48 *  |  | 9  | 9  | 28 | 46  | 0.02    |
| 124487139 | FlnC          | filamin-C                                                         | 4   | 6   | 9   | 19  | 0.44 *  |  | 0  | 0  | 0  | 0   |         |
| 46048490  | Fen1          | flap endonuclease 1                                               | 30  | 33  | 34  | 97  | 0.07    |  | 1  | 10 | 13 | 24  | 0.02    |
| 21450325  | Blvrb         | flavin reductase                                                  | 0   | 1   | 0   | 1   | 0.74 #  |  | 0  | 0  | 1  | 1   | 0.18    |
| 6679809   | Flot1         | flotillin-1                                                       | 0   | 2   | 0   | 2   | 0.57    |  | 0  | 4  | 1  | 5   | 0.39    |
| 6679811   | Flot2         | flotillin-2 isoform 2                                             | 0   | 0   | 0   | 0   |         |  | 0  | 1  | 0  | 1   | 0.08    |
| 160333158 | Fiz1          | flt3-interacting zinc finger protein 1                            | 2   | 1   | 0   | 3   | -0.12   |  | 0  | 1  | 0  | 1   | -0.12   |
| 21553307  | Flywch2       | FLYWCH family member 2                                            | 0   | 1   | 0   | 1   | 0.70 #  |  | 0  | 0  | 0  | 0   |         |
| 82546826  | Foxk1         | forkhead box protein K1                                           | 3   | 6   | 5   | 14  | 0.29    |  | 0  | 2  | 2  | 4   | 3.24 #  |
| 238018071 | Foxk2         | forkhead box protein K2                                           | 0   | 1   | 0   | 1   | 0.97 #  |  | 0  | 0  | 0  | 0   |         |
| 309243073 | Foxp1         | forkhead box protein P1 isoform 3                                 | 0   | 1   | 0   | 1   | 0.34    |  | 0  | 0  | 0  | 0   |         |
| 161016780 | Foxp4         | forkhead box protein P4 isoform 3                                 | 1   | 0   | 0   | 1   | 0.51    |  | 0  | 0  | 0  | 0   |         |
| 9055220   | Fnbp4         | formin-binding protein 4                                          | 0   | 3   | 1   | 4   | 0.88 #  |  | 0  | 0  | 0  | 0   |         |
| 124378048 | Fmn2          | formin-like protein 2                                             | 0   | 0   | 1   | 1   | -1.49 # |  | 0  | 0  | 5  | 5   | 0.10    |
| 38708163  | Fmn3          | formin-like protein 3                                             | 0   | 0   | 0   | 0   |         |  | 0  | 5  | 0  | 5   | 0.72 #  |
| 34328117  | Fosl2         | fos-related antigen 2                                             | 2   | 4   | 4   | 10  | 1.28 #  |  | 0  | 1  | 2  | 3   | -0.64 # |
| 6753866   | Fhl2          | four and a half LIM domains protein 2                             | 0   | 1   | 0   | 1   | 0.12    |  | 0  | 0  | 0  | 0   |         |
| 51036613  | Fmr1          | fragile X mental retardation protein 1 homolog                    | 1   | 4   | 1   | 6   | -0.06   |  | 0  | 0  | 0  | 0   |         |
| 163954943 | Fxr1          | fragile X mental retardation syndrome-related protein 1 isoform 2 | 0   | 1   | 0   | 1   | 0.65 #  |  | 0  | 0  | 0  | 0   |         |
| 6679863   | Fxn           | frataxin, mitochondrial precursor                                 | 2   | 0   | 0   | 2   | -0.07   |  | 0  | 0  | 0  | 0   |         |
| 31981251  | 2500003M10Rik | Friend of PRMT1 protein                                           | 29  | 32  | 25  | 86  | 0.02    |  | 60 | 33 | 41 | 134 | 0.06    |
| 6671539   | Aldoa         | fructose-bisphosphate aldolase A isoform 2                        | 19  | 22  | 21  | 62  | -0.24   |  | 0  | 2  | 8  | 10  | 0.07    |
| 21450291  | Aldob         | fructose-bisphosphate aldolase B                                  | 0   | 1   | 0   | 1   | 2.26 #  |  | 0  | 0  | 0  | 0   |         |
| 60687506  | Aldoc         | fructose-bisphosphate aldolase C                                  | 0   | 0   | 4   | 4   | -0.44   |  | 0  | 0  | 0  | 0   |         |
| 226823367 | Fh1           | fumarate hydratase, mitochondrial precursor                       | 5   | 4   | 6   | 15  | -0.17 * |  | 0  | 2  | 1  | 3   | -0.28   |
| 12963697  | Fahd1         | fumarylacetoacetate hydrolase domain-containing protein 1         | 5   | 5   | 5   | 15  | -0.17   |  | 0  | 0  | 0  | 0   |         |
| 29366814  | Fahd2a        | fumarylacetoacetate hydrolase domain-containing protein 2A        | 2   | 2   | 3   | 7   | 0.01    |  | 0  | 0  | 0  | 0   |         |
| 21312526  | Fundc1        | FUN14 domain-containing protein 1                                 | 2   | 3   | 2   | 7   | -0.19 * |  | 0  | 0  | 0  | 0   |         |
| 262050556 | Fundc2        | FUN14 domain-containing protein 2                                 | 4   | 2   | 2   | 8   | -0.21   |  | 0  | 0  | 0  | 0   |         |
| 125991228 | Gpkow         | G patch domain and KOW motifs-containing protein                  | 0   | 2   | 4   | 6   | 0.05    |  | 0  | 1  | 0  | 1   | 0.03    |
| 226958329 | Gpatch8       | G patch domain containing 8                                       | 0   | 5   | 0   | 5   | -0.08   |  | 0  | 0  | 7  | 7   | -0.01   |
| 160948592 | Gpatch4       | G patch domain-containing protein 4                               | 0   | 0   | 0   | 0   |         |  | 0  | 0  | 4  | 4   | -0.34   |

|           |         |                                                                     |    |    |    |     |         |    |    |    |    |         |  |
|-----------|---------|---------------------------------------------------------------------|----|----|----|-----|---------|----|----|----|----|---------|--|
| 309263335 | Gm5806  | G/T mismatch-specific thymine DNA glycosylase-like                  | 0  | 3  | 0  | 3   | 0.16    | 0  | 0  | 0  | 0  |         |  |
| 34328119  | Gabpa   | GA-binding protein alpha chain                                      | 6  | 12 | 5  | 23  | 0.18    | 0  | 0  | 0  | 0  |         |  |
| 46575942  | Gabpb1  | GA-binding protein subunit beta-1 isoform a                         | 0  | 1  | 0  | 1   | 0.26    | 0  | 0  | 0  | 0  |         |  |
| 6753934   | Gabpb1  | GA-binding protein subunit beta-1 isoform b                         | 1  | 0  | 0  | 1   | 0.01    | 0  | 0  | 0  | 0  |         |  |
| 93102411  | Galc    | galactocerebrosidase precursor                                      | 2  | 2  | 0  | 4   | -0.04   | 0  | 7  | 8  | 15 | 0.06    |  |
| 93102413  | Galk1   | galactokinase                                                       | 0  | 0  | 0  | 0   |         | 0  | 0  | 3  | 3  | 0.05    |  |
| 13195672  | B3gat3  | galactosylgalactosylxylosylprotein 3-beta-glucuronosyltransferase 3 | 0  | 1  | 0  | 1   | 2.76 #  | 0  | 0  | 0  | 0  |         |  |
| 6678682   | Lgals1  | galectin-1                                                          | 21 | 8  | 16 | 45  | -0.09   | 17 | 2  | 8  | 27 | -0.13   |  |
| 225543163 | Lgals3  | galectin-3                                                          | 3  | 4  | 4  | 11  | 0.00    | 0  | 0  | 2  | 2  | 0.11    |  |
| 9256551   | Lgals8  | galectin-8                                                          | 0  | 2  | 0  | 2   | 0.16    | 0  | 0  | 0  | 0  |         |  |
| 226531139 | Lgals9  | galectin-9 isoform 2                                                | 2  | 1  | 1  | 4   | 0.09    | 0  | 6  | 4  | 10 | 0.03    |  |
| 255759890 | Add3    | gamma-adducin isoform b                                             | 4  | 4  | 1  | 9   | 0.58 #  | 0  | 0  | 0  | 0  |         |  |
| 149253627 | Gm3724  | gamma-aminobutyric acid receptor-associated protein-like 2-like     | 0  | 0  | 1  | 1   | 0.06    | 0  | 0  | 0  | 0  |         |  |
| 100815972 | Ggh     | gamma-glutamyl hydrolase precursor                                  | 1  | 0  | 0  | 1   | -0.32   | 0  | 0  | 0  | 0  |         |  |
| 125628657 | Ifi30   | gamma-interferon-inducible lysosomal thiol reductase                | 10 | 4  | 4  | 18  | 0.05    | 0  | 0  | 0  | 0  |         |  |
| 110625902 | Napg    | gamma-soluble NSF attachment protein                                | 1  | 0  | 0  | 1   | -2.79 # | 0  | 0  | 0  | 0  |         |  |
| 39930567  | Tubgcp3 | gamma-tubulin complex component 3                                   | 0  | 0  | 0  | 0   |         | 0  | 0  | 1  | 1  | 0.39    |  |
| 6806917   | Gm2a    | ganglioside GM2 activator precursor                                 | 2  | 2  | 5  | 9   | 0.13    | 0  | 0  | 0  | 0  |         |  |
| 269954702 | Gsdmc2  | gasdermin-C2                                                        | 2  | 2  | 0  | 4   | 0.90 #  | 0  | 3  | 0  | 3  | 0.72 #  |  |
| 161086973 | Gatad1  | GATA zinc finger domain-containing protein 1                        | 6  | 6  | 7  | 19  | 0.05    | 0  | 1  | 1  | 2  | 0.16    |  |
| 47059159  | Gatc    | gatC-like protein                                                   | 3  | 0  | 0  | 3   | -0.11   | 0  | 0  | 0  | 0  |         |  |
| 112807186 | Gcn11   | GCN1 general control of amino-acid synthesis 1-like 1               | 3  | 1  | 7  | 11  | 0.06    | 4  | 12 | 39 | 55 | 0.10    |  |
| 226437608 | Gcfc1   | GC-rich sequence DNA-binding factor 1                               | 7  | 9  | 6  | 22  | 0.15    | 0  | 12 | 3  | 15 | 0.21    |  |
| 31982147  | H6pd    | GDH/6PGL endoplasmic bifunctional protein                           | 1  | 0  | 0  | 1   | -0.08   | 0  | 0  | 0  | 0  |         |  |
| 19525731  | Pofut2  | GDP-fucose protein O-fucosyltransferase 2 precursor                 | 1  | 0  | 0  | 1   | -0.02   | 0  | 0  | 0  | 0  |         |  |
| 13654268  | Tsta3   | GDP-L-fucose synthase                                               | 0  | 0  | 0  | 0   |         | 0  | 0  | 2  | 2  | 0.07    |  |
| 28916693  | Gsn     | gelsolin isoform 1 precursor                                        | 6  | 14 | 8  | 28  | 0.02    | 8  | 12 | 33 | 53 | 0.19    |  |
| 262331526 | Gemin4  | gemin 4                                                             | 0  | 0  | 0  | 0   |         | 0  | 0  | 3  | 3  | -0.24   |  |
| 225543576 | Gtl3    | gene trap locus 3                                                   | 12 | 15 | 5  | 32  | -0.03   | 2  | 5  | 4  | 11 | -0.07   |  |
| 46402235  | Gtf3c1  | general transcription factor 3C polypeptide 1                       | 46 | 90 | 41 | 177 | 0.15    | 2  | 12 | 9  | 23 | 0.00    |  |
| 85861229  | Gtf3c2  | general transcription factor 3C polypeptide 2                       | 4  | 16 | 7  | 27  | 0.03    | 0  | 2  | 1  | 3  | 0.26    |  |
| 75677510  | Gtf3c3  | general transcription factor 3C polypeptide 3                       | 12 | 13 | 7  | 32  | 0.18    | 6  | 19 | 11 | 36 | 0.06    |  |
| 260436918 | Gtf3c4  | general transcription factor 3C polypeptide 4 isoform 1             | 13 | 19 | 10 | 42  | 0.18    | 0  | 0  | 4  | 4  | 0.00    |  |
| 260447060 | Gtf3c4  | general transcription factor 3C polypeptide 4 isoform 2             | 0  | 0  | 0  | 0   |         | 0  | 5  | 0  | 5  | 0.01    |  |
| 22507323  | Gtf3c5  | general transcription factor 3C polypeptide 5                       | 3  | 2  | 2  | 7   | 0.25 *  | 0  | 1  | 2  | 3  | -1.57 # |  |
| 27754091  | Gtf3c6  | general transcription factor 3C polypeptide 6                       | 4  | 1  | 1  | 6   | 0.19    | 0  | 0  | 0  | 0  |         |  |
| 268838606 | Gtf2e2  | general transcription factor IIE subunit 2                          | 6  | 8  | 5  | 19  | -0.15   | 0  | 0  | 1  | 1  | 0.10    |  |
| 20270031  | Gtf2f1  | general transcription factor IIF subunit 1                          | 5  | 10 | 7  | 22  | 0.22    | 0  | 1  | 3  | 4  | 0.31    |  |
| 39930425  | Gtf2f2  | general transcription factor IIF subunit 2                          | 7  | 12 | 7  | 26  | 0.17    | 0  | 1  | 0  | 1  | 0.70 #  |  |
| 188035919 | Gtf2h1  | general transcription factor IIH subunit 1                          | 2  | 4  | 1  | 7   | 0.20    | 0  | 0  | 0  | 0  |         |  |
| 225543398 | Gtf2h2  | general transcription factor IIH subunit 2                          | 3  | 3  | 1  | 7   | 0.13    | 0  | 0  | 0  | 0  |         |  |
| 31088894  | Gtf2h3  | general transcription factor IIH subunit 3                          | 0  | 2  | 1  | 3   | 0.32    | 0  | 1  | 0  | 1  | -9.93 # |  |

|           |              |                                                                     |    |    |    |     |        |  |     |     |     |      |        |
|-----------|--------------|---------------------------------------------------------------------|----|----|----|-----|--------|--|-----|-----|-----|------|--------|
| 6754094   | Gtf2h4       | general transcription factor IIH subunit 4                          | 3  | 3  | 1  | 7   | 0.30   |  | 0   | 0   | 1   | 1    | 0.07   |
| 157951657 | Gtf2h5       | general transcription factor IIH subunit 5                          | 1  | 0  | 2  | 3   | 0.11   |  | 0   | 0   | 0   | 0    |        |
| 124001570 | Gtf2i        | general transcription factor II-I isoform 4                         | 74 | 76 | 44 | 194 | 0.15*  |  | 0   | 7   | 5   | 12   | 0.20   |
| 160333071 | Gmcl1        | germ cell-less protein-like 1                                       | 0  | 0  | 1  | 1   | -0.01  |  | 0   | 9   | 6   | 15   | 0.04   |
| 188528613 | Gmfb         | glia maturation factor beta                                         | 4  | 4  | 2  | 10  | -1.54# |  | 0   | 0   | 0   | 0    |        |
| 228480230 | Gltscr2      | glioma tumor suppressor candidate region gene 2                     | 0  | 0  | 0  | 0   |        |  | 0   | 0   | 1   | 1    | 0.25   |
| 7305085   | Gfpt1        | glucosamine--fructose-6-phosphate aminotransferase [isomerizing] 1  | 0  | 0  | 0  | 0   |        |  | 0   | 0   | 2   | 2    | 0.98#  |
| 254553458 | Gpi1         | glucose-6-phosphate isomerase                                       | 9  | 7  | 15 | 31  | -0.01  |  | 31  | 54  | 116 | 201  | -0.17  |
| 6679465   | Prkcsh       | glucosidase 2 subunit beta precursor                                | 10 | 0  | 0  | 10  | -0.44  |  | 3   | 0   | 0   | 3    | 0.32   |
| 116734815 | Gba          | glucosylceramidase isoform 2                                        | 1  | 1  | 2  | 4   | 0.14   |  | 0   | 0   | 1   | 1    | 0.23   |
| 6680027   | Glud1        | glutamate dehydrogenase 1, mitochondrial precursor                  | 15 | 0  | 1  | 16  | -0.13  |  | 1   | 1   | 0   | 2    | -0.08  |
| 6680019   | Gclm         | glutamate--cysteine ligase regulatory subunit                       | 0  | 0  | 0  | 0   |        |  | 0   | 0   | 3   | 3    | 0.20   |
| 163937861 | Grwd1        | glutamate-rich WD repeat-containing protein 1                       | 12 | 14 | 11 | 37  | 0.06   |  | 0   | 13  | 9   | 22   | -0.01  |
| 164607135 | Gls          | glutaminase isoform 2                                               | 3  | 0  | 0  | 3   | -0.15  |  | 0   | 0   | 0   | 0    |        |
| 269954679 | Qars         | glutamyl-tRNA synthetase isoform 2                                  | 0  | 0  | 0  | 0   |        |  | 0   | 0   | 1   | 1    | -0.32  |
| 84370330  | Glrx2        | glutaredoxin-2, mitochondrial isoform b                             | 0  | 0  | 1  | 1   | -0.20  |  | 0   | 0   | 0   | 0    |        |
| 21312153  | Glrx5        | glutaredoxin-related protein 5, mitochondrial                       | 8  | 2  | 13 | 23  | -0.16  |  | 0   | 3   | 1   | 4    | -0.09  |
| 113680425 | Gcdh         | glutaryl-CoA dehydrogenase, mitochondrial precursor                 | 1  | 2  | 1  | 4   | -0.09  |  | 0   | 0   | 0   | 0    |        |
| 84871986  | Gpx1         | glutathione peroxidase 1                                            | 4  | 8  | 4  | 16  | 0.14   |  | 1   | 7   | 4   | 12   | 0.25   |
| 160298213 | Gsr          | glutathione reductase, mitochondrial precursor                      | 3  | 0  | 0  | 3   | 0.05   |  | 0   | 1   | 0   | 1    | 0.04   |
| 31981724  | Gsta3        | glutathione S-transferase A3                                        | 0  | 0  | 0  | 0   |        |  | 0   | 4   | 2   | 6    | -0.09  |
| 160298217 | Gsta4        | glutathione S-transferase A4                                        | 0  | 1  | 0  | 1   | 0.14   |  | 1   | 15  | 9   | 25   | -0.02  |
| 21313138  | Gstk1        | glutathione S-transferase kappa 1                                   | 7  | 11 | 11 | 29  | 0.02   |  | 0   | 1   | 0   | 1    | 0.62#  |
| 6754084   | Gstm1        | glutathione S-transferase Mu 1                                      | 20 | 28 | 35 | 83  | 0.37   |  | 6   | 22  | 27  | 55   | 0.94#  |
| 6680121   | Gstm2        | glutathione S-transferase Mu 2                                      | 16 | 22 | 25 | 63  | 0.21   |  | 17  | 28  | 35  | 80   | 0.02   |
| 33468899  | Gstm3        | glutathione S-transferase Mu 3                                      | 2  | 2  | 0  | 4   | 0.34   |  | 0   | 0   | 0   | 0    |        |
| 6754086   | Gstm5        | glutathione S-transferase Mu 5                                      | 0  | 0  | 0  | 0   |        |  | 0   | 4   | 5   | 9    | 0.00   |
| 6754090   | Gsto1        | glutathione S-transferase omega-1                                   | 2  | 3  | 2  | 7   | -0.09  |  | 0   | 4   | 2   | 6    | -0.44  |
| 10092608  | Gstp1        | glutathione S-transferase P 1                                       | 22 | 14 | 14 | 50  | 0.14   |  | 1   | 13  | 13  | 27   | 0.12   |
| 160298219 | Gstt1        | glutathione S-transferase theta-1                                   | 0  | 0  | 0  | 0   |        |  | 0   | 1   | 0   | 1    | 0.52#  |
| 21536248  | Gstt3        | glutathione S-transferase, theta 3                                  | 0  | 0  | 1  | 1   | -0.77# |  | 0   | 8   | 7   | 15   | -0.02  |
| 309262504 | LOC100046480 | glyceraldehyde-3-phosphate dehydrogenase-like                       | 0  | 3  | 0  | 3   | 0.55   |  | 0   | 0   | 0   | 0    |        |
| 149273202 | LOC100042025 | glyceraldehyde-3-phosphate dehydrogenase-like isoform 2             | 79 | 79 | 67 | 225 | -0.15  |  | 428 | 459 | 553 | 1440 | -0.09  |
| 6753966   | Gpd1         | glycerol-3-phosphate dehydrogenase [NAD+], cytoplasmic              | 2  | 2  | 0  | 4   | -0.17  |  | 0   | 0   | 1   | 1    | -0.09  |
| 224922803 | Gpd2         | glycerol-3-phosphate dehydrogenase, mitochondrial precursor         | 13 | 0  | 1  | 14  | -0.12  |  | 2   | 0   | 2   | 4    | 0.00   |
| 23956140  | Gdpd1        | glycerophosphodiester phosphodiesterase domain-containing protein 1 | 3  | 0  | 0  | 3   | -0.24  |  | 0   | 0   | 0   | 0    |        |
| 13386066  | Gcsh         | glycine cleavage system H protein, mitochondrial precursor          | 2  | 0  | 2  | 4   | -0.07  |  | 0   | 0   | 0   | 0    |        |
| 31560022  | Gys1         | glycogen [starch] synthase, muscle                                  | 0  | 3  | 3  | 6   | 0.44   |  | 1   | 16  | 29  | 46   | 0.13   |
| 24418919  | Pygb         | glycogen phosphorylase, brain form                                  | 0  | 0  | 0  | 0   |        |  | 0   | 1   | 3   | 4    | -0.60# |
| 9790077   | Gsk3b        | glycogen synthase kinase-3 beta                                     | 0  | 2  | 6  | 8   | -0.03  |  | 0   | 0   | 0   | 0    |        |
| 31560404  | Gltp         | glycolipid transfer protein                                         | 1  | 0  | 0  | 1   | 0.26   |  | 0   | 0   | 1   | 1    | -0.32  |
| 6754046   | Gpaa1        | glycosylphosphatidylinositol anchor attachment 1 protein            | 1  | 0  | 0  | 1   | -1.48# |  | 0   | 0   | 0   | 0    |        |

|           |              |                                                                       |    |    |    |     |         |    |    |    |     |         |
|-----------|--------------|-----------------------------------------------------------------------|----|----|----|-----|---------|----|----|----|-----|---------|
| 260166652 | Glt2d2       | glycosyltransferase 28 domain containing 1-like                       | 5  | 1  | 2  | 8   | -0.07   | 0  | 0  | 0  | 0   |         |
| 6679082   | Nmt1         | glycylpeptide N-tetradecanoyltransferase 1                            | 6  | 11 | 6  | 23  | -0.06   | 0  | 1  | 3  | 4   | 0.36    |
| 93102417  | Gars         | glycyl-tRNA synthetase                                                | 1  | 0  | 0  | 1   | 0.11    | 0  | 0  | 0  | 0   |         |
| 255003777 | Glod4        | glyoxalase domain-containing protein 4                                | 1  | 0  | 0  | 1   | -0.63 # | 0  | 2  | 4  | 6   | -0.11   |
| 28565287  | Gpc5         | glypican-5 precursor                                                  | 0  | 0  | 0  | 0   |         | 1  | 0  | 0  | 1   | -5.68 # |
| 85861218  | Gmps         | GMP synthase [glutamine-hydrolyzing]                                  | 5  | 12 | 7  | 24  | 0.16    | 0  | 3  | 3  | 6   | 0.02    |
| 6677905   | Glg1         | Golgi apparatus protein 1 precursor                                   | 46 | 34 | 54 | 134 | -0.14 * | 7  | 10 | 6  | 23  | 0.01    |
| 226958601 | Golgb1       | golgi autoantigen, golgin subfamily b, macrogolgin 1                  | 2  | 7  | 1  | 10  | 0.04    | 0  | 0  | 0  | 0   |         |
| 78190502  | Golm1        | Golgi membrane protein 1                                              | 0  | 0  | 0  | 0   |         | 1  | 0  | 0  | 1   | -0.73 # |
| 14140240  | Golph3       | Golgi phosphoprotein 3                                                | 4  | 0  | 0  | 4   | -0.18   | 0  | 0  | 0  | 0   |         |
| 31542904  | Gosr1        | Golgi SNAP receptor complex member 1                                  | 0  | 1  | 0  | 1   | -0.56   | 0  | 0  | 0  | 0   |         |
| 24528553  | Gosr2        | Golgi SNAP receptor complex member 2                                  | 1  | 0  | 1  | 2   | -0.82 # | 0  | 2  | 0  | 2   | -0.88 # |
| 254281178 | Get4         | Golgi to ER traffic protein 4 homolog isoform 2                       | 0  | 0  | 0  | 0   |         | 1  | 2  | 5  | 8   | -0.13   |
| 124378030 | Golga2       | Golgin subfamily A member 2 isoform b                                 | 4  | 4  | 1  | 9   | -0.13   | 0  | 0  | 0  | 0   |         |
| 20127150  | Golga4       | Golgin subfamily A member 4                                           | 0  | 0  | 1  | 1   | 0.73 #  | 0  | 0  | 0  | 0   |         |
| 109809747 | Golga7       | Golgin subfamily A member 7                                           | 1  | 0  | 2  | 3   | 0.17    | 0  | 0  | 0  | 0   |         |
| 239937480 | Pigo         | GPI ethanolamine phosphate transferase 3                              | 0  | 0  | 0  | 0   |         | 0  | 1  | 0  | 1   | -1.68 # |
| 254028203 | Pgap1        | GPI inositol-deacylase                                                | 5  | 10 | 7  | 22  | -0.23 * | 21 | 10 | 22 | 53  | -0.27 * |
| 41351529  | Pigs         | GPI transamidase component PIG-S                                      | 2  | 1  | 3  | 6   | -0.18 * | 14 | 5  | 1  | 20  | -0.27   |
| 29788753  | Pigk         | GPI-anchor transamidase isoform 1                                     | 1  | 0  | 0  | 1   | -0.56   | 3  | 2  | 0  | 5   | -0.31   |
| 160333231 | Gprc5c       | G-protein coupled receptor family C group 5 member C isoform a        | 2  | 3  | 3  | 8   | 0.76 #  | 2  | 4  | 0  | 6   | 1.35 #  |
| 160333233 | Gprc5c       | G-protein coupled receptor family C group 5 member C isoform b        | 0  | 1  | 0  | 1   | 0.44    | 0  | 0  | 0  | 0   |         |
| 46810275  | Grhl2        | grainyhead-like protein 2 homolog                                     | 9  | 9  | 3  | 21  | -0.26   | 0  | 0  | 0  | 0   |         |
| 27369870  | Gramd4       | GRAM domain-containing protein 4 isoform 1                            | 0  | 2  | 0  | 2   | 0.02    | 0  | 0  | 0  | 0   |         |
| 224967126 | Grn          | granulins                                                             | 44 | 44 | 38 | 126 | 0.09    | 14 | 20 | 13 | 47  | 0.01    |
| 148596982 | Grsf1        | G-rich sequence factor 1 isoform 2                                    | 0  | 0  | 0  | 0   |         | 0  | 0  | 1  | 1   | 0.04    |
| 85701616  | Gcom1        | GRINL1A complex locus protein 1                                       | 0  | 0  | 0  | 0   |         | 0  | 1  | 0  | 1   | 0.00    |
| 21312546  | Fam162a      | growth and transformation-dependent protein                           | 24 | 19 | 23 | 66  | -0.14   | 41 | 6  | 7  | 54  | -0.11   |
| 269315840 | Gadd45gip1   | growth arrest and DNA damage-inducible proteins-interacting protein 1 | 1  | 3  | 0  | 4   | -0.32   | 0  | 0  | 0  | 0   |         |
| 6680083   | Grb2         | growth factor receptor-bound protein 2                                | 2  | 4  | 3  | 9   | 0.06    | 0  | 2  | 0  | 2   | 0.47 #  |
| 312283736 | Ghitm        | growth hormone-inducible transmembrane protein                        | 2  | 3  | 2  | 7   | -0.09   | 0  | 3  | 2  | 5   | 0.15    |
| 13277394  | Grpel1       | grpE protein homolog 1, mitochondrial precursor                       | 8  | 5  | 6  | 19  | -0.19 * | 3  | 1  | 2  | 6   | 0.20    |
| 23956104  | Ak3          | GTP:AMP phosphotransferase, mitochondrial                             | 23 | 11 | 14 | 48  | -0.17 * | 0  | 3  | 4  | 7   | -0.26   |
| 165377197 | Eral1        | GTPase Era, mitochondrial                                             | 1  | 3  | 1  | 5   | -0.22   | 0  | 0  | 0  | 0   |         |
| 266458391 | Kras         | GTPase KRas                                                           | 3  | 6  | 6  | 15  | -0.16   | 0  | 2  | 1  | 3   | -0.03   |
| 149260287 | LOC100045999 | GTP-binding nuclear protein Ran-like                                  | 18 | 27 | 12 | 57  | 0.10    | 60 | 37 | 24 | 121 | 0.03    |
| 70778897  | Gtpbp1       | GTP-binding protein 1                                                 | 1  | 0  | 1  | 2   | -0.16   | 0  | 0  | 0  | 0   |         |
| 21313623  | Gtpbp8       | GTP-binding protein 8 isoform 1                                       | 12 | 21 | 13 | 46  | -0.05   | 0  | 0  | 0  | 0   |         |
| 226693391 | Gtpbp8       | GTP-binding protein 8 isoform 2                                       | 0  | 0  | 0  | 0   |         | 0  | 3  | 0  | 3   | 0.04    |
| 28626508  | Rheb         | GTP-binding protein Rheb precursor                                    | 1  | 0  | 0  | 1   | -0.40   | 0  | 1  | 0  | 1   | 0.03    |
| 21703344  | Sar1a        | GTP-binding protein SAR1a                                             | 5  | 0  | 3  | 8   | -0.32   | 0  | 7  | 8  | 15  | -0.18   |
| 41054806  | Gnai2        | guanine nucleotide-binding protein G(i) subunit alpha-2               | 17 | 27 | 20 | 64  | 0.07    | 54 | 43 | 63 | 160 | 0.30    |
| 294774560 | Gng12        | guanine nucleotide-binding protein G(I)/G(S)/G(O) subunit gamma-12    | 11 | 8  | 10 | 29  | 0.04    | 14 | 6  | 8  | 28  | 0.33    |



|           |               |                                                                        |    |    |     |     |         |     |     |     |     |         |
|-----------|---------------|------------------------------------------------------------------------|----|----|-----|-----|---------|-----|-----|-----|-----|---------|
| 309262910 | Gm3785        | guanine nucleotide-binding protein G(I)/G(S)/G(O) subunit gamma-5-like | 0  | 1  | 0   | 1   | -0.03   | 0   | 0   | 0   | 0   |         |
| 229608938 | Gnb1          | guanine nucleotide-binding protein G(I)/G(S)/G(T) subunit beta-1       | 13 | 21 | 20  | 54  | 0.08    | 28  | 17  | 22  | 67  | 0.26 *  |
| 13937391  | Gnb2          | guanine nucleotide-binding protein G(I)/G(S)/G(T) subunit beta-2       | 16 | 34 | 26  | 76  | 0.13    | 62  | 36  | 35  | 133 | 0.25    |
| 33563256  | Gnai3         | guanine nucleotide-binding protein G(k) subunit alpha                  | 8  | 18 | 8   | 34  | 0.14    | 25  | 19  | 17  | 61  | 0.40    |
| 6754004   | Gna11         | guanine nucleotide-binding protein subunit alpha-11                    | 0  | 0  | 2   | 2   | -0.07   | 0   | 1   | 2   | 3   | 0.09    |
| 6754006   | Gna12         | guanine nucleotide-binding protein subunit alpha-12                    | 0  | 4  | 3   | 7   | -0.33   | 0   | 0   | 0   | 0   |         |
| 89001109  | Gna13         | guanine nucleotide-binding protein subunit alpha-13                    | 2  | 0  | 4   | 6   | 0.10    | 11  | 4   | 2   | 17  | 0.31    |
| 160298199 | Gna14         | guanine nucleotide-binding protein subunit alpha-14                    | 0  | 3  | 0   | 3   | 0.27    | 0   | 0   | 0   | 0   |         |
| 6680047   | Gnb2l1        | guanine nucleotide-binding protein subunit beta-2-like 1               | 43 | 38 | 49  | 130 | -0.08   | 10  | 46  | 67  | 123 | -0.09   |
| 31542899  | Gnb4          | guanine nucleotide-binding protein subunit beta-4                      | 0  | 3  | 0   | 3   | -0.46   | 0   | 0   | 0   | 0   |         |
| 30524920  | Gnl3          | guanine nucleotide-binding protein-like 3 long isoform                 | 4  | 4  | 4   | 12  | 0.19    | 12  | 33  | 47  | 92  | 0.14    |
| 13384710  | Gar1          | H/ACA ribonucleoprotein complex subunit 1                              | 22 | 22 | 22  | 66  | -0.08   | 11  | 17  | 15  | 43  | -0.07   |
| 13386120  | Nhp2          | H/ACA ribonucleoprotein complex subunit 2                              | 16 | 20 | 18  | 54  | 0.00    | 36  | 23  | 19  | 78  | -0.10 * |
| 13384790  | Nop10         | H/ACA ribonucleoprotein complex subunit 3                              | 16 | 20 | 14  | 50  | -0.16   | 4   | 5   | 3   | 12  | -0.04   |
| 91064867  | Dkc1          | H/ACA ribonucleoprotein complex subunit 4                              | 45 | 46 | 30  | 121 | -0.10   | 43  | 64  | 32  | 139 | -0.07 * |
| 133922588 | H2-K1         | H-2 class I histocompatibility antigen, K-W28 alpha chain isoform 1    | 1  | 0  | 0   | 1   | -0.50   | 0   | 0   | 0   | 0   |         |
| 158937262 | 2200002D01Rik | HAI-2 related small protein                                            | 0  | 1  | 0   | 1   | -0.70 # | 0   | 0   | 0   | 0   |         |
| 21312204  | Hdh3          | haloacid dehalogenase-like hydrolase domain-containing protein 3       | 1  | 0  | 0   | 1   | 1.14 #  | 0   | 0   | 0   | 0   |         |
| 269954704 | Haus4         | HAUS augmin-like complex subunit 4                                     | 0  | 0  | 0   | 0   |         | 0   | 1   | 0   | 1   | -0.13   |
| 110611224 | Hbs1l         | HBS1-like protein isoform 2                                            | 0  | 1  | 0   | 1   | -0.02   | 0   | 0   | 0   | 0   |         |
| 160948577 | Hs1bp3        | HCLS1-binding protein 3                                                | 0  | 0  | 0   | 0   |         | 0   | 0   | 1   | 1   | 0.27    |
| 28076933  | 2010305A19Rik | hcp beta-lactamase-like protein C1orf163 homolog                       | 2  | 1  | 0   | 3   | -0.05   | 0   | 0   | 0   | 0   |         |
| 38505263  | Heatr5a       | HEAT repeat-containing protein 5A                                      | 0  | 1  | 0   | 1   | 0.54    | 0   | 0   | 0   | 0   |         |
| 82880662  | Hspa14        | heat shock 70 kDa protein 14 isoform 1                                 | 0  | 1  | 0   | 1   | 0.24    | 0   | 0   | 0   | 0   |         |
| 124339829 | Hspa1a        | heat shock 70 kDa protein 1A                                           | 2  | 9  | 0   | 11  | 0.09    | 96  | 53  | 147 | 296 | 0.07    |
| 124339826 | Hspa1b        | heat shock 70 kDa protein 1B                                           | 50 | 64 | 60  | 174 | 0.18 *  | 0   | 49  | 105 | 154 | 0.09    |
| 124339838 | Hspa1l        | heat shock 70 kDa protein 1-like                                       | 14 | 18 | 33  | 65  | 0.12    | 52  | 25  | 149 | 226 | 0.09    |
| 112293266 | Hspa4         | heat shock 70 kDa protein 4                                            | 5  | 9  | 17  | 31  | -0.03   | 0   | 0   | 3   | 3   | -0.40   |
| 40254361  | Hspa4l        | heat shock 70 kDa protein 4L                                           | 0  | 0  | 0   | 0   |         | 0   | 0   | 1   | 1   | -0.17   |
| 31981690  | Hspa8         | heat shock cognate 71 kDa protein                                      | 76 | 99 | 102 | 277 | 0.09    | 318 | 210 | 456 | 984 | 0.09    |
| 21311873  | Hsbp1         | heat shock factor-binding protein 1                                    | 5  | 4  | 2   | 11  | 0.18    | 5   | 0   | 4   | 9   | 0.41    |
| 13385998  | Trap1         | heat shock protein 75 kDa, mitochondrial precursor                     | 11 | 4  | 6   | 21  | -0.02   | 76  | 55  | 72  | 203 | -0.06   |
| 158937312 | Hspb1         | heat shock protein beta-1                                              | 0  | 0  | 0   | 0   |         | 0   | 0   | 5   | 5   | 0.24    |
| 6754254   | Hsp90aa1      | heat shock protein HSP 90-alpha                                        | 9  | 14 | 9   | 32  | 0.13    | 114 | 93  | 265 | 472 | -0.05   |
| 40556608  | Hsp90ab1      | heat shock protein HSP 90-beta                                         | 12 | 11 | 8   | 31  | 0.12    | 93  | 129 | 330 | 552 | -0.08   |
| 31560686  | Hspa2         | heat shock-related 70 kDa protein 2                                    | 2  | 17 | 33  | 52  | 0.14    | 0   | 15  | 54  | 69  | 0.03    |
| 39573709  | Hn1l          | hematological and neurological expressed 1-like protein                | 4  | 4  | 2   | 10  | 0.17    | 0   | 0   | 0   | 0   |         |
| 209862939 | Hmox2         | heme oxygenase 2                                                       | 17 | 1  | 5   | 23  | -0.24 * | 6   | 3   | 5   | 14  | -0.28   |
| 170172560 | Hs2st1        | heparan sulfate 2-O-sulfotransferase 1                                 | 0  | 3  | 3   | 6   | -0.16   | 0   | 1   | 2   | 3   | 0.13    |

|           |              |                                                                    |     |     |     |      |         |     |     |     |      |         |
|-----------|--------------|--------------------------------------------------------------------|-----|-----|-----|------|---------|-----|-----|-----|------|---------|
| 237820655 | Hbxip        | hepatitis B virus X-interacting protein homolog                    | 0   | 1   | 0   | 1    | -0.04   | 0   | 0   | 0   | 0    |         |
| 111185900 | Hnf1b        | hepatocyte nuclear factor 1-beta                                   | 4   | 6   | 2   | 12   | -0.01   | 0   | 0   | 0   | 0    |         |
| 66793398  | Foxa1        | hepatocyte nuclear factor 3-alpha                                  | 0   | 1   | 0   | 1    | 0.04    | 0   | 0   | 0   | 0    |         |
| 188497724 | Hdgf         | hepatoma-derived growth factor                                     | 35  | 48  | 34  | 117  | 0.08    | 2   | 10  | 10  | 22   | 0.26    |
| 6680201   | Hdgfrp2      | hepatoma-derived growth factor-related protein 2                   | 9   | 10  | 9   | 28   | 0.11    | 16  | 36  | 42  | 94   | 0.03    |
| 34787412  | Hdgfrp3      | hepatoma-derived growth factor-related protein 3                   | 15  | 14  | 12  | 41   | 0.00    | 7   | 7   | 11  | 25   | -0.15   |
| 171543869 | Hp1bp3       | heterochromatin protein 1-binding protein 3 isoform 1              | 33  | 46  | 16  | 95   | -0.03   | 111 | 78  | 94  | 283  | -0.08 * |
| 171543871 | Hp1bp3       | heterochromatin protein 1-binding protein 3 isoform 2              | 0   | 2   | 2   | 4    | -0.18   | 0   | 2   | 6   | 8    | -0.04   |
| 6754222   | Hnrnpab      | heterogeneous nuclear ribonucleoprotein A/B isoform 2              | 135 | 141 | 130 | 406  | -0.14 * | 262 | 235 | 231 | 728  | -0.08 * |
| 226443091 | Hnrnpa0      | heterogeneous nuclear ribonucleoprotein A0                         | 105 | 77  | 66  | 248  | -0.13   | 218 | 150 | 149 | 517  | -0.10   |
| 6754220   | Hnrnpa1      | heterogeneous nuclear ribonucleoprotein A1 isoform a               | 244 | 241 | 209 | 694  | -0.03   | 457 | 360 | 299 | 1116 | -0.09   |
| 37674277  | Hnrnpa3      | heterogeneous nuclear ribonucleoprotein A3 isoform a               | 170 | 241 | 0   | 411  | -0.03   | 0   | 0   | 0   | 0    |         |
| 309264948 | Gm11847      | heterogeneous nuclear ribonucleoprotein A3-like                    | 0   | 0   | 156 | 156  | -0.01   | 538 | 204 | 152 | 894  | -0.05   |
| 309263242 | LOC100505153 | heterogeneous nuclear ribonucleoprotein A3-like isoform 2          | 26  | 20  | 21  | 67   | -0.04   | 0   | 251 | 267 | 518  | -0.09   |
| 116256514 | Hnrnpd       | heterogeneous nuclear ribonucleoprotein D0 isoform c               | 36  | 85  | 63  | 184  | -0.09   | 72  | 66  | 57  | 195  | -0.09   |
| 116256516 | Hnrnpd       | heterogeneous nuclear ribonucleoprotein D0 isoform d               | 38  | 11  | 11  | 60   | -0.12   | 71  | 75  | 56  | 202  | -0.14   |
| 148664250 | Hnrpdl       | heterogeneous nuclear ribonucleoprotein D-like                     | 44  | 42  | 38  | 124  | -0.01   | 102 | 75  | 65  | 242  | -0.07   |
| 261878597 | Hnrnpf       | heterogeneous nuclear ribonucleoprotein F                          | 82  | 110 | 128 | 320  | -0.05   | 321 | 245 | 354 | 920  | -0.01   |
| 83699420  | Rbmxt        | heterogeneous nuclear ribonucleoprotein G                          | 67  | 67  | 39  | 173  | -0.16 * | 187 | 120 | 115 | 422  | -0.10   |
| 10946928  | HnrnpH1      | heterogeneous nuclear ribonucleoprotein H                          | 72  | 103 | 147 | 322  | -0.07   | 218 | 254 | 354 | 826  | 0.00    |
| 9845253   | HnrnpH2      | heterogeneous nuclear ribonucleoprotein H2                         | 37  | 42  | 71  | 150  | -0.08   | 118 | 112 | 156 | 386  | -0.04   |
| 119637823 | HnrnpH3      | heterogeneous nuclear ribonucleoprotein H3                         | 40  | 45  | 39  | 124  | -0.05   | 73  | 65  | 62  | 200  | -0.05   |
| 13384620  | Hnrnpk       | heterogeneous nuclear ribonucleoprotein K                          | 349 | 400 | 325 | 1074 | -0.01   | 630 | 520 | 575 | 1725 | 0.01    |
| 183980004 | HnrnpL       | heterogeneous nuclear ribonucleoprotein L                          | 372 | 405 | 269 | 1046 | -0.09   | 616 | 661 | 710 | 1987 | -0.08   |
| 110347535 | Hnrpll       | heterogeneous nuclear ribonucleoprotein L-like                     | 47  | 76  | 62  | 185  | -0.02   | 10  | 26  | 15  | 51   | -0.15   |
| 21313308  | HnrnpM       | heterogeneous nuclear ribonucleoprotein M isoform a                | 0   | 0   | 0   | 0    |         | 0   | 403 | 0   | 403  | 0.07    |
| 158186704 | HnrnpM       | heterogeneous nuclear ribonucleoprotein M isoform b                | 212 | 254 | 177 | 643  | -0.05   | 734 | 356 | 928 | 2018 | 0.11    |
| 114145493 | Syncrip      | heterogeneous nuclear ribonucleoprotein Q isoform 1                | 71  | 83  | 65  | 219  | -0.12   | 0   | 61  | 61  | 122  | -0.19   |
| 29788787  | Syncrip      | heterogeneous nuclear ribonucleoprotein Q isoform 2                | 14  | 20  | 8   | 42   | -0.72 # | 66  | 23  | 41  | 130  | -0.23   |
| 33859724  | HnrnpR       | heterogeneous nuclear ribonucleoprotein R                          | 71  | 82  | 62  | 215  | -0.14   | 105 | 119 | 108 | 332  | -0.12 * |
| 160333923 | HnrnpU       | heterogeneous nuclear ribonucleoprotein U                          | 317 | 387 | 376 | 1080 | -0.04   | 786 | ### | 990 | 2784 | -0.09   |
| 21450323  | HnrnpU1      | heterogeneous nuclear ribonucleoprotein U-like protein 1 isoform 1 | 0   | 2   | 0   | 2    | -1.10 # | 2   | 16  | 19  | 37   | 0.10    |

|           |              |                                                                                  |     |     |     |     |         |     |     |     |      |         |  |
|-----------|--------------|----------------------------------------------------------------------------------|-----|-----|-----|-----|---------|-----|-----|-----|------|---------|--|
| 30017405  | Hnrnpul1     | heterogeneous nuclear ribonucleoprotein U-like protein 1 isoform 2               | 1   | 0   | 0   | 1   | -0.03   | 0   | 0   | 0   | 0    |         |  |
| 124487099 | Hnrnpul2     | heterogeneous nuclear ribonucleoprotein U-like protein 2                         | 67  | 73  | 117 | 257 | -0.07 * | 396 | 493 | 485 | 1374 | -0.11   |  |
| 32880197  | Hnrnpa2b1    | heterogeneous nuclear ribonucleoproteins A2/B1 isoform 2                         | 140 | 151 | 194 | 485 | -0.05   | 0   | 39  | 83  | 122  | -0.09   |  |
| 309267107 | LOC100045191 | heterogeneous nuclear ribonucleoproteins A2/B1-like                              | 127 | 180 | 206 | 513 | -0.04   | 546 | 454 | 262 | 1262 | -0.08   |  |
| 8393544   | Hnrnpc       | heterogeneous nuclear ribonucleoproteins C1/C2 isoform 1                         | 67  | 53  | 87  | 207 | -0.23 * | 204 | 109 | 115 | 428  | -0.05   |  |
| 283436176 | Hnrnpc       | heterogeneous nuclear ribonucleoproteins C1/C2 isoform 2                         | 48  | 64  | 94  | 206 | -0.31 * | 220 | 146 | 201 | 567  | -0.08   |  |
| 283436182 | Hnrnpc       | heterogeneous nuclear ribonucleoproteins C1/C2 isoform 4                         | 7   | 0   | 1   | 8   | -0.03   | 0   | 13  | 13  | 26   | -0.02   |  |
| 225735584 | Hk1          | hexokinase-1 isoform HK1                                                         | 91  | 62  | 62  | 215 | 0.46 *  | 81  | 88  | 83  | 252  | 0.34 *  |  |
| 7305143   | Hk2          | hexokinase-2                                                                     | 15  | 4   | 10  | 29  | 0.45 *  | 0   | 0   | 11  | 11   | 0.38    |  |
| 9789977   | Higd1a       | HIG1 domain family member 1A                                                     | 2   | 0   | 0   | 2   | -0.43   | 0   | 2   | 0   | 2    | 0.37    |  |
| 21313298  | Hmg3         | high mobility group nucleosome-binding domain-containing protein 3 isoform Hmg3a | 17  | 23  | 13  | 53  | -0.13 * | 37  | 9   | 14  | 60   | -0.20   |  |
| 133778915 | Hmg5         | high mobility group nucleosome-binding domain-containing protein 5               | 23  | 37  | 17  | 77  | 0.31    | 9   | 20  | 26  | 55   | 0.32    |  |
| 15022805  | Hmg20a       | high mobility group protein 20A                                                  | 0   | 0   | 2   | 2   | 0.23    | 8   | 8   | 11  | 27   | 0.00    |  |
| 6754208   | Hmgb1        | high mobility group protein B1                                                   | 0   | 58  | 70  | 128 | 0.07    | 0   | 0   | 0   | 0    |         |  |
| 162329617 | Hmg111       | high mobility group protein B1                                                   | 0   | 0   | 55  | 55  | -0.10   | 0   | 0   | 0   | 0    |         |  |
| 309262982 | Gm6115       | high mobility group protein B1-like                                              | 0   | 0   | 0   | 0   |         | 0   | 2   | 0   | 2    | 0.67 #  |  |
| 83014391  | LOC637733    | high mobility group protein B1-like                                              | 68  | 0   | 0   | 68  | -0.29   | 0   | 39  | 30  | 69   | 0.22    |  |
| 82952271  | Gm6115       | high mobility group protein B1-like                                              | 0   | 23  | 43  | 66  | 0.04    | 0   | 0   | 0   | 0    |         |  |
| 6680229   | Hmgb2        | high mobility group protein B2                                                   | 89  | 95  | 89  | 273 | -0.11   | 47  | 59  | 42  | 148  | -0.04   |  |
| 6680231   | Hmgb3        | high mobility group protein B3                                                   | 31  | 41  | 31  | 103 | 0.07    | 1   | 8   | 6   | 15   | -0.02   |  |
| 262072972 | Hmga1-rs1    | high mobility group protein HMG-I/HMG-Y isoform 2                                | 8   | 8   | 6   | 22  | -0.11   | 16  | 9   | 8   | 33   | -0.08   |  |
| 86198323  | Hmga1        | high mobility group protein HMG-I/HMG-Y isoform a                                | 7   | 16  | 18  | 41  | -0.12   | 0   | 10  | 15  | 25   | -0.13   |  |
| 262331509 | Hmga1        | high mobility group protein HMG-I/HMG-Y isoform c                                | 7   | 0   | 0   | 7   | -0.14   | 27  | 0   | 0   | 27   | -0.06   |  |
| 262331515 | Hmga1        | high mobility group protein HMG-I/HMG-Y isoform e                                | 0   | 9   | 16  | 25  | -0.15   | 0   | 0   | 0   | 0    |         |  |
| 6754210   | Hmga2        | high mobility group protein HMGI-C                                               | 35  | 41  | 33  | 109 | 0.01    | 88  | 27  | 38  | 153  | -0.02   |  |
| 7949055   | Hpcal1       | hippocalcin-like protein 1                                                       | 7   | 8   | 10  | 25  | -0.82 # | 1   | 2   | 3   | 6    | -4.73 # |  |
| 33468857  | Hint1        | histidine triad nucleotide-binding protein 1                                     | 3   | 1   | 2   | 6   | 0.01    | 0   | 1   | 2   | 3    | -0.10   |  |
| 110625719 | Hint2        | histidine triad nucleotide-binding protein 2, mitochondrial precursor            | 3   | 1   | 3   | 7   | -0.07   | 0   | 0   | 0   | 0    |         |  |
| 160333390 | H2-Q1        | histocompatibility 2, Q region locus 1                                           | 1   | 0   | 0   | 1   | 4.77 #  | 0   | 0   | 0   | 0    |         |  |
| 300116314 | Kat2b        | histone acetyltransferase KAT2B isoform 2                                        | 0   | 1   | 0   | 1   | 0.77 #  | 0   | 0   | 0   | 0    |         |  |
| 303521989 | Myst2        | histone acetyltransferase MYST2 isoform 2                                        | 0   | 0   | 0   | 0   |         | 33  | 36  | 50  | 119  | -0.15 * |  |
| 29244000  | Myst2        | histone acetyltransferase MYST2 isoform 3                                        | 3   | 6   | 1   | 10  | -0.07   | 0   | 4   | 1   | 5    | -0.19   |  |
| 28076885  | Hat1         | histone acetyltransferase type B catalytic subunit                               | 0   | 0   | 0   | 0   |         | 0   | 6   | 11  | 17   | -0.42   |  |
| 13384964  | Asf1a        | histone chaperone ASF1A                                                          | 7   | 9   | 4   | 20  | 0.12    | 2   | 2   | 3   | 7    | 0.40    |  |
| 6680193   | Hdac1        | histone deacetylase 1                                                            | 40  | 59  | 29  | 128 | 0.22    | 60  | 84  | 56  | 200  | 0.18    |  |
| 87162464  | Hdac2        | histone deacetylase 2                                                            | 25  | 27  | 33  | 85  | 0.19    | 35  | 39  | 41  | 115  | 0.23    |  |
| 89257352  | Hdac3        | histone deacetylase 3                                                            | 5   | 6   | 4   | 15  | 0.48 *  | 0   | 0   | 1   | 1    | 0.62 #  |  |
| 194353997 | Hdac6        | histone deacetylase 6                                                            | 19  | 19  | 20  | 58  | 0.08    | 0   | 4   | 4   | 8    | 0.03    |  |
| 27881435  | Sap130       | histone deacetylase complex subunit SAP130                                       | 0   | 2   | 2   | 4   | 0.77 #  | 0   | 0   | 0   | 0    |         |  |

|           |            |                                                            |     |    |     |     |       |     |     |     |      |       |   |
|-----------|------------|------------------------------------------------------------|-----|----|-----|-----|-------|-----|-----|-----|------|-------|---|
| 12408290  | Sap30      | histone deacetylase complex subunit SAP30                  | 0   | 1  | 0   | 1   | 0.01  | 0   | 0   | 0   | 0    |       |   |
| 124487193 | Sap30l     | histone deacetylase complex subunit SAP30L                 | 3   | 5  | 3   | 11  | -0.37 | 0   | 0   | 0   | 0    |       |   |
| 31560697  | H1f0       | histone H1.0                                               | 41  | 51 | 31  | 123 | -0.10 | 249 | 190 | 133 | 572  | -0.14 | * |
| 21426823  | Hist1h1a   | histone H1.1                                               | 28  | 33 | 23  | 84  | -0.18 | 105 | 88  | 65  | 258  | -0.20 | * |
| 9845257   | Hist1h1c   | histone H1.2                                               | 53  | 68 | 52  | 173 | -0.16 | 252 | 151 | 129 | 532  | -0.21 | * |
| 254588110 | Hist1h1d   | histone H1.3                                               | 0   | 0  | 0   | 0   |       | 0   | 253 | 75  | 328  | -0.16 |   |
| 13430890  | Hist1h1e   | histone H1.4                                               | 42  | 49 | 32  | 123 | -0.13 | 244 | 224 | 187 | 655  | -0.20 |   |
| 21426893  | Hist1h1b   | histone H1.5                                               | 25  | 36 | 8   | 69  | -0.16 | 195 | 178 | 82  | 455  | -0.18 | * |
| 30061327  | Hist1h2ah  | histone H2A type 1-H                                       | 5   | 18 | 42  | 65  | -0.23 | 151 | 92  | 157 | 400  | -0.11 | * |
| 30061399  | Hist2h2aa2 | histone H2A type 2-A                                       | 0   | 0  | 0   | 0   |       | 0   | 52  | 0   | 52   | -0.21 |   |
| 119433657 | Hist2h2ab  | histone H2A type 2-B                                       | 25  | 19 | 29  | 73  | -0.22 | 113 | 121 | 172 | 406  | -0.08 | * |
| 30089710  | Hist2h2ac  | histone H2A type 2-C                                       | 32  | 0  | 0   | 32  | 0.14  | 147 | 54  | 72  | 273  | -0.09 | * |
| 29244126  | H2afj      | histone H2A.J                                              | 0   | 0  | 0   | 0   |       | 0   | 50  | 0   | 50   | -0.17 |   |
| 256773209 | H2afv      | histone H2A.V                                              | 13  | 0  | 0   | 13  | 0.05  | 158 | 22  | 65  | 245  | -0.12 | * |
| 7106331   | H2afx      | histone H2A.x                                              | 0   | 0  | 0   | 0   |       | 119 | 90  | 0   | 209  | -0.12 |   |
| 7949045   | H2afz      | histone H2A.Z                                              | 0   | 11 | 15  | 26  | -0.35 | 0   | 72  | 0   | 72   | -0.21 |   |
| 28316760  | Hist1h2bb  | histone H2B type 1-B                                       | 120 | 20 | 88  | 228 | -0.18 | 0   | 374 | 281 | 655  | -0.13 |   |
| 294997245 | Hist1h2be  | histone H2B type 1-C/E/G                                   | 0   | 43 | 0   | 43  | -0.72 | 580 | 232 | 239 | 1051 | -0.10 |   |
| 30089704  | Hist1h2bk  | histone H2B type 1-K                                       | 0   | 0  | 0   | 0   |       | 0   | 74  | 0   | 74   | -0.13 |   |
| 68226431  | Hist2h2be  | histone H2B type 2-E                                       | 0   | 40 | 0   | 40  | -0.66 | 0   | 47  | 0   | 47   | -0.31 |   |
| 13386452  | Hist3h2ba  | histone H2B type 3-A                                       | 0   | 0  | 0   | 0   |       | 545 | 79  | 0   | 624  | -0.10 |   |
| 30061345  | Hist1h3i   | histone H3.1                                               | 0   | 0  | 0   | 0   |       | 20  | 12  | 0   | 32   | -0.04 |   |
| 30061339  | Hist1h3b   | histone H3.2                                               | 3   | 0  | 0   | 3   | -0.10 | 155 | 57  | 2   | 214  | -0.02 |   |
| 6680161   | H3f3b      | histone H3.3                                               | 0   | 0  | 0   | 0   |       | 0   | 29  | 0   | 29   | -0.23 |   |
| 94395561  | Gm10257    | histone H3.3-like isoform 1                                | 0   | 0  | 0   | 0   |       | 69  | 0   | 0   | 69   | 0.21  |   |
| 6680920   | Cenpa      | histone H3-like centromeric protein A                      | 0   | 1  | 0   | 1   | -0.78 | 0   | 0   | 0   | 0    |       |   |
| 309265743 | LOC674678  | histone H4-like                                            | 90  | 95 | 122 | 307 | -0.22 | 704 | 624 | 364 | 1692 | -0.10 | * |
| 164518891 | Phf8       | histone lysine demethylase PHF8 isoform b                  | 0   | 5  | 0   | 5   | 0.11  | 0   | 0   | 0   | 0    |       |   |
| 47059484  | Rbbp4      | histone-binding protein RBBP4                              | 18  | 13 | 16  | 47  | 0.27  | 23  | 31  | 18  | 72   | 0.20  |   |
| 157909799 | Rbbp7      | histone-binding protein RBBP7                              | 6   | 11 | 10  | 27  | 0.15  | 12  | 15  | 8   | 35   | 0.16  |   |
| 157838004 | Ehmt1      | histone-lysine N-methyltransferase EHMT1 isoform 3         | 1   | 0  | 5   | 6   | 0.29  | 7   | 5   | 26  | 38   | 0.07  |   |
| 157838009 | Ehmt1      | histone-lysine N-methyltransferase EHMT1 isoform 4         | 0   | 0  | 0   | 0   |       | 0   | 30  | 0   | 30   | 0.03  |   |
| 22219432  | Ehmt2      | histone-lysine N-methyltransferase EHMT2 isoform G9a short | 3   | 4  | 4   | 11  | 0.43  | 7   | 40  | 63  | 110  | 0.20  |   |
| 6679719   | Ezh1       | histone-lysine N-methyltransferase EZH1                    | 0   | 2  | 4   | 6   | 0.21  | 0   | 3   | 9   | 12   | 0.18  |   |
| 226442803 | Ezh2       | histone-lysine N-methyltransferase EZH2 isoform 1          | 5   | 7  | 7   | 19  | 0.06  | 0   | 19  | 30  | 49   | -0.08 |   |
| 226442807 | Ezh2       | histone-lysine N-methyltransferase EZH2 isoform 2          | 0   | 0  | 0   | 0   |       | 10  | 0   | 13  | 23   | -0.09 |   |
| 124486682 | Mll1       | histone-lysine N-methyltransferase MLL                     | 6   | 7  | 2   | 15  | 0.06  | 2   | 4   | 12  | 18   | 0.17  |   |
| 257743033 | Mll2       | histone-lysine N-methyltransferase MLL2                    | 16  | 90 | 20  | 126 | 0.57  | 0   | 0   | 0   | 0    |       |   |
| 48958537  | Whsc1l1    | histone-lysine N-methyltransferase NSD3 isoform 1          | 2   | 6  | 1   | 9   | -0.04 | 0   | 2   | 2   | 4    | -0.15 |   |
| 31543790  | Suv39h2    | histone-lysine N-methyltransferase SUV39H2                 | 0   | 0  | 0   | 0   |       | 0   | 3   | 4   | 7    | -0.17 |   |
| 169234797 | Suv420h2   | histone-lysine N-methyltransferase SUV420H2                | 0   | 0  | 0   | 0   |       | 0   | 4   | 0   | 4    | -0.25 |   |
| 23956212  | Htatsf1    | HIV Tat-specific factor 1 homolog                          | 0   | 0  | 2   | 2   | 0.72  | 0   | 0   | 0   | 0    |       |   |
| 6754232   | Hoxa5      | homeobox protein Hox-A5                                    | 0   | 2  | 0   | 2   | 0.67  | 0   | 0   | 0   | 0    |       |   |
| 21886813  | Hoxb6      | homeobox protein Hox-B6                                    | 1   | 5  | 1   | 7   | -0.14 | 0   | 0   | 0   | 0    |       |   |
| 88014652  | Hoxb7      | homeobox protein Hox-B7                                    | 1   | 3  | 0   | 4   | -0.58 | 0   | 0   | 1   | 1    | 0.26  |   |
| 21362265  | Hoxb8      | homeobox protein Hox-B8                                    | 8   | 6  | 4   | 18  | -0.38 | 0   | 4   | 4   | 8    | 0.13  |   |
| 31560501  | Hoxd10     | homeobox protein Hox-D10                                   | 1   | 0  | 2   | 3   | 0.05  | 0   | 0   | 1   | 1    | -0.17 |   |

|           |                |                                                               |    |    |    |     |         |     |     |     |     |         |  |
|-----------|----------------|---------------------------------------------------------------|----|----|----|-----|---------|-----|-----|-----|-----|---------|--|
| 158508520 | Hoxd4          | homeobox protein Hox-D4                                       | 0  | 2  | 0  | 2   | 0.16    | 0   | 0   | 0   | 0   |         |  |
| 112807184 | Hoxd8          | homeobox protein Hox-D8                                       | 6  | 4  | 1  | 11  | 0.02    | 0   | 1   | 4   | 5   | 0.19    |  |
| 300796099 | Meis1          | homeobox protein Meis1 isoform B                              | 0  | 1  | 0  | 1   | 0.09    | 0   | 0   | 0   | 0   |         |  |
| 227330557 | Meis2          | homeobox protein Meis2 isoform 6                              | 0  | 1  | 0  | 1   | 0.73#   | 0   | 0   | 0   | 0   |         |  |
| 31542626  | Hmbox1         | homeobox-containing protein 1                                 | 4  | 7  | 6  | 17  | -0.71*# | 0   | 1   | 0   | 1   | -0.61#  |  |
| 171846263 | Homer1         | homer protein homolog 1 isoform L                             | 0  | 0  | 1  | 1   | 2.77#   | 0   | 0   | 0   | 0   |         |  |
| 225903402 | Homer3         | homer protein homolog 3 isoform 2                             | 0  | 0  | 1  | 1   | 0.58#   | 0   | 0   | 0   | 0   |         |  |
| 25092696  | Psmc3ip        | homologous-pairing protein 2 homolog                          | 1  | 2  | 0  | 3   | -0.64#  | 0   | 0   | 0   | 0   |         |  |
| 34328130  | Hcfc1          | host cell factor 1                                            | 66 | 79 | 56 | 201 | 0.46*   | 0   | 3   | 0   | 3   | 0.16    |  |
| 124487041 | Hcfc2          | host cell factor 2                                            | 1  | 5  | 6  | 12  | 0.01    | 0   | 2   | 1   | 3   | -0.10   |  |
| 19526912  | St13           | hsc70-interacting protein                                     | 2  | 1  | 1  | 4   | -0.12   | 0   | 0   | 2   | 2   | 0.08    |  |
| 7949018   | Cdc37          | hsp90 co-chaperone Cdc37                                      | 0  | 0  | 0  | 0   |         | 0   | 0   | 1   | 1   | -0.04   |  |
| 225007582 | Hip1           | huntingtin-interacting protein 1                              | 0  | 1  | 0  | 1   | 0.33    | 0   | 0   | 0   | 0   |         |  |
| 255308928 | Hip1r          | huntingtin-interacting protein 1-related protein              | 0  | 4  | 2  | 6   | 0.22    | 0   | 0   | 0   | 0   |         |  |
| 27229055  | 2310003F16Rik  | huntingtin-interacting protein K                              | 5  | 2  | 4  | 11  | -0.03   | 0   | 0   | 0   | 0   |         |  |
| 111038118 | Hadh           | hydroxyacyl-coenzyme A dehydrogenase, mitochondrial precursor | 24 | 27 | 32 | 83  | -0.01   | 1   | 3   | 7   | 11  | -0.06   |  |
| 227499240 | Hagh           | hydroxyacylglutathione hydrolase, mitochondrial isoform 2     | 1  | 8  | 4  | 13  | 0.01    | 0   | 0   | 0   | 0   |         |  |
| 125656150 | Hsd12          | hydroxysteroid dehydrogenase-like protein 2                   | 3  | 0  | 0  | 3   | 0.06    | 0   | 0   | 0   | 0   |         |  |
| 149252246 | Gm12751        | hypothetical protein LOC100039220                             | 1  | 0  | 0  | 1   | -0.36   | 0   | 0   | 0   | 0   |         |  |
| 309264231 | Gm15431        | hypothetical protein LOC100041098                             | 1  | 2  | 2  | 5   | 0.02    | 0   | 0   | 0   | 0   |         |  |
| 153945763 | 1700047117Rik2 | hypothetical protein LOC100101807                             | 0  | 1  | 2  | 3   | 0.06    | 0   | 0   | 0   | 0   |         |  |
| 309264063 | LOC100502623   | hypothetical protein LOC100502623                             | 0  | 1  | 0  | 1   | -0.24   | 0   | 0   | 0   | 0   |         |  |
| 30425010  | D330045A20Rik  | hypothetical protein LOC102871                                | 0  | 0  | 0  | 0   |         | 1   | 0   | 0   | 1   | -10.02# |  |
| 110625732 | AI314976       | hypothetical protein LOC106821                                | 5  | 8  | 4  | 17  | -0.23   | 0   | 0   | 0   | 0   |         |  |
| 237858808 | AI462493       | hypothetical protein LOC107197 precursor                      | 3  | 1  | 0  | 4   | -0.16   | 0   | 0   | 0   | 0   |         |  |
| 19527218  | 1810008A18Rik  | hypothetical protein LOC108707                                | 0  | 3  | 0  | 3   | -0.02   | 0   | 4   | 1   | 5   | 0.07    |  |
| 116812912 | E330016A19Rik  | hypothetical protein LOC214763                                | 0  | 0  | 0  | 0   |         | 3   | 12  | 9   | 24  | 0.02    |  |
| 21450219  | BC017643       | hypothetical protein LOC217370                                | 2  | 0  | 0  | 2   | -0.49   | 0   | 0   | 1   | 1   | 0.35    |  |
| 226958568 | BC002230       | hypothetical protein LOC217827                                | 0  | 1  | 0  | 1   | -0.07   | 0   | 0   | 0   | 0   |         |  |
| 21450053  | Fam49b         | hypothetical protein LOC223601                                | 0  | 0  | 0  | 0   |         | 0   | 0   | 1   | 1   | 0.06    |  |
| 210147428 | C030006K11Rik  | hypothetical protein LOC223665 isoform 2                      | 1  | 1  | 0  | 2   | -0.16   | 0   | 0   | 0   | 0   |         |  |
| 161484644 | AI661453       | hypothetical protein LOC224833                                | 0  | 2  | 0  | 2   | 0.44    | 0   | 0   | 0   | 0   |         |  |
| 40254190  | BC027072       | hypothetical protein LOC225004                                | 0  | 0  | 0  | 0   |         | 2   | 0   | 0   | 2   | 6.50#   |  |
| 23956330  | BC029214       | hypothetical protein LOC227622                                | 2  | 8  | 6  | 16  | -0.14   | 0   | 1   | 0   | 1   | 0.06    |  |
| 305682577 | D2Wsu81e       | hypothetical protein LOC227695                                | 4  | 12 | 8  | 24  | -0.17   | 2   | 6   | 10  | 18  | -0.11   |  |
| 21450249  | BC005624       | hypothetical protein LOC227707                                | 0  | 2  | 2  | 4   | 0.47    | 0   | 0   | 0   | 0   |         |  |
| 85701806  | Gm561          | hypothetical protein LOC228715                                | 0  | 1  | 1  | 2   | -0.08   | 0   | 0   | 0   | 0   |         |  |
| 255003755 | Fam76a         | hypothetical protein LOC230789 isoform B                      | 1  | 0  | 1  | 2   | -0.34   | 0   | 0   | 0   | 0   |         |  |
| 85861260  | C230096C10Rik  | hypothetical protein LOC230866 isoform 2                      | 2  | 6  | 4  | 12  | -0.32   | 9   | 13  | 11  | 33  | -0.28   |  |
| 170650679 | E130309D02Rik  | hypothetical protein LOC231868                                | 4  | 5  | 7  | 16  | 0.26*   | 0   | 6   | 2   | 8   | 0.45#   |  |
| 254553410 | C130039O16Rik  | hypothetical protein LOC238317                                | 12 | 12 | 9  | 33  | 0.00    | 0   | 1   | 0   | 1   | -0.17   |  |
| 148225566 | Gm4987         | hypothetical protein LOC245405                                | 0  | 2  | 0  | 2   | -0.44   | 0   | 0   | 0   | 0   |         |  |
| 148539955 | D4Wsu53e       | hypothetical protein LOC27981                                 | 0  | 0  | 0  | 0   |         | 0   | 1   | 1   | 2   | 0.66#   |  |
| 149588667 | D11Wsu99e      | hypothetical protein LOC28081                                 | 1  | 0  | 0  | 1   | 0.17    | 0   | 0   | 0   | 0   |         |  |
| 18250288  | D17Wsu104e     | hypothetical protein LOC28106 precursor                       | 4  | 3  | 2  | 9   | 0.03    | 0   | 0   | 0   | 0   |         |  |
| 70794816  | Gm5506         | hypothetical protein LOC433182                                | 22 | 21 | 40 | 83  | 0.04    | 208 | 194 | 320 | 722 | -0.09   |  |
| 26553441  | D1Bwg0212e     | hypothetical protein LOC52846                                 | 0  | 1  | 1  | 2   | 0.37    | 0   | 0   | 0   | 0   |         |  |
| 293651623 | Gm6788         | hypothetical protein LOC627788                                | 4  | 11 | 4  | 19  | -0.05   | 5   | 4   | 1   | 10  | 0.07    |  |
| 158517961 | Gm6900         | hypothetical protein LOC628596                                | 0  | 0  | 19 | 19  | -0.24   | 0   | 0   | 3   | 3   | -0.01   |  |
| 13384686  | 0610009B22Rik  | hypothetical protein LOC66050                                 | 0  | 0  | 1  | 1   | -0.22   | 0   | 0   | 0   | 0   |         |  |
| 13384876  | 1810009A15Rik  | hypothetical protein LOC66276                                 | 3  | 1  | 1  | 5   | -0.01   | 0   | 0   | 0   | 0   |         |  |
| 224177530 | 1810013D10Rik  | hypothetical protein LOC66278                                 | 2  | 0  | 0  | 2   | -0.17   | 0   | 0   | 2   | 2   | 0.08    |  |
| 13384880  | 1810029B16Rik  | hypothetical protein LOC66282                                 | 7  | 5  | 6  | 18  | -0.17   | 0   | 0   | 1   | 1   | -0.42   |  |

|           |               |                                         |    |    |    |    |         |  |    |    |    |    |         |
|-----------|---------------|-----------------------------------------|----|----|----|----|---------|--|----|----|----|----|---------|
| 13384908  | 1700011A15Rik | hypothetical protein LOC66322           | 0  | 0  | 0  | 0  |         |  | 0  | 0  | 1  | 1  | 4.73 #  |
| 170650653 | 2310022A10Rik | hypothetical protein LOC66367 isoform 2 | 3  | 0  | 1  | 4  | 0.18    |  | 0  | 2  | 1  | 3  | 0.19    |
| 21313500  | 2310011J03Rik | hypothetical protein LOC66374           | 1  | 0  | 0  | 1  | 0.16    |  | 0  | 0  | 0  | 0  |         |
| 30794468  | 2410001C21Rik | hypothetical protein LOC66404           | 7  | 9  | 10 | 26 | 0.22    |  | 0  | 1  | 3  | 4  | 0.17    |
| 13384984  | 2410004B18Rik | hypothetical protein LOC66421           | 0  | 3  | 2  | 5  | 1.90    |  | 0  | 0  | 0  | 0  |         |
| 13385042  | Fam136a       | hypothetical protein LOC66488           | 4  | 5  | 5  | 14 | -0.07   |  | 0  | 0  | 0  | 0  |         |
| 165932364 | 2610528E23Rik | hypothetical protein LOC66497           | 4  | 7  | 4  | 15 | 0.03    |  | 0  | 1  | 4  | 5  | 0.43    |
| 268836896 | 2810004N23Rik | hypothetical protein LOC66523           | 1  | 3  | 0  | 4  | 0.08    |  | 0  | 1  | 3  | 4  | -0.03   |
| 13385088  | Fam107b       | hypothetical protein LOC66540           | 2  | 2  | 4  | 8  | 0.05    |  | 0  | 0  | 0  | 0  |         |
| 13385182  | 4921524J17Rik | hypothetical protein LOC66714           | 2  | 2  | 2  | 6  | -0.01   |  | 0  | 0  | 0  | 0  |         |
| 309268884 | Gm8556        | hypothetical protein LOC667284          | 0  | 0  | 68 | 68 | -0.13   |  | 18 | 0  | 0  | 18 | -0.37   |
| 13385560  | 2900010M23Rik | hypothetical protein LOC67267           | 16 | 18 | 13 | 47 | -0.12   |  | 5  | 0  | 2  | 7  | -0.23   |
| 13385576  | 3110040N11Rik | hypothetical protein LOC67290           | 1  | 2  | 2  | 5  | -0.05   |  | 0  | 0  | 0  | 0  |         |
| 13385590  | 1700037H04Rik | hypothetical protein LOC67326           | 1  | 1  | 0  | 2  | 0.16    |  | 0  | 0  | 0  | 0  |         |
| 31981066  | 2410127L17Rik | hypothetical protein LOC67383           | 0  | 1  | 2  | 3  | 0.31    |  | 0  | 0  | 0  | 0  |         |
| 113931152 | 4930453N24Rik | hypothetical protein LOC67609           | 0  | 0  | 0  | 0  |         |  | 0  | 1  | 0  | 1  | 0.75 #  |
| 268837283 | 5830433M19Rik | hypothetical protein LOC67770           | 0  | 1  | 0  | 1  | 0.65 #  |  | 0  | 1  | 0  | 1  | -0.67 # |
| 13385904  | 1700021F05Rik | hypothetical protein LOC67851           | 4  | 12 | 6  | 22 | -0.12   |  | 0  | 0  | 4  | 4  | -0.27   |
| 30424683  | 1810063B05Rik | hypothetical protein LOC67892           | 7  | 5  | 7  | 19 | -0.09   |  | 0  | 0  | 0  | 0  |         |
| 13385950  | Fam32a        | hypothetical protein LOC67922           | 0  | 2  | 1  | 3  | -0.06   |  | 0  | 0  | 0  | 0  |         |
| 13386026  | 2700060E02Rik | hypothetical protein LOC68045           | 25 | 31 | 34 | 90 | 0.00    |  | 0  | 21 | 6  | 27 | -0.03   |
| 13386028  | 2700062C07Rik | hypothetical protein LOC68046           | 5  | 6  | 1  | 12 | 0.40    |  | 0  | 1  | 0  | 1  | 0.29    |
| 145587094 | 9430016H08Rik | hypothetical protein LOC68115 precursor | 2  | 2  | 0  | 4  | -0.24   |  | 0  | 2  | 1  | 3  | 0.06    |
| 46810273  | 9530077C05Rik | hypothetical protein LOC68283           | 0  | 1  | 0  | 1  | -2.96 # |  | 0  | 0  | 0  | 0  |         |
| 58037115  | 0610011F06Rik | hypothetical protein LOC68347           | 2  | 3  | 3  | 8  | 0.04    |  | 0  | 2  | 3  | 5  | 0.12    |
| 85362708  | 2310036O22Rik | hypothetical protein LOC68544           | 4  | 9  | 2  | 15 | 0.06    |  | 0  | 1  | 3  | 4  | 0.28    |
| 294345430 | 1110001A16Rik | hypothetical protein LOC68554           | 0  | 0  | 0  | 0  |         |  | 0  | 0  | 1  | 1  | 0.12    |
| 254540116 | Fam172a       | hypothetical protein LOC68675 isoform 2 | 0  | 0  | 1  | 1  | 0.28    |  | 0  | 0  | 0  | 0  |         |
| 268370114 | 1110057K04Rik | hypothetical protein LOC68832 isoform 2 | 4  | 0  | 0  | 4  | -0.52   |  | 1  | 1  | 0  | 2  | -0.19   |
| 110625730 | 1810027O10Rik | hypothetical protein LOC69186 precursor | 0  | 0  | 2  | 2  | -0.14   |  | 3  | 0  | 2  | 5  | 0.09    |
| 117647251 | 2010321M09Rik | hypothetical protein LOC69882           | 11 | 8  | 10 | 29 | 0.26 *  |  | 2  | 6  | 5  | 13 | 0.20    |
| 21312460  | 2010107G23Rik | hypothetical protein LOC69894           | 1  | 0  | 1  | 2  | -0.39 * |  | 0  | 0  | 0  | 0  |         |
| 121583673 | 2510012J08Rik | hypothetical protein LOC70312           | 0  | 3  | 0  | 3  | -0.09   |  | 0  | 2  | 4  | 6  | -0.93 # |
| 27229101  | 5730469M10Rik | hypothetical protein LOC70564 precursor | 10 | 3  | 7  | 20 | -0.05   |  | 8  | 2  | 11 | 21 | -0.18   |
| 28076961  | 5730508B09Rik | hypothetical protein LOC70617           | 2  | 2  | 2  | 6  | -0.38 * |  | 0  | 0  | 0  | 0  |         |
| 281371374 | 4921524L21Rik | hypothetical protein LOC70901           | 0  | 1  | 0  | 1  | -2.75 # |  | 0  | 0  | 0  | 0  |         |
| 229576969 | 2310007B03Rik | hypothetical protein LOC71874           | 0  | 1  | 0  | 1  | 1.42 #  |  | 0  | 0  | 0  | 0  |         |
| 242332520 | 2010109K11Rik | hypothetical protein LOC72123           | 0  | 0  | 0  | 0  |         |  | 0  | 2  | 1  | 3  | 0.00    |
| 226442859 | 1300018I17Rik | hypothetical protein LOC72325           | 0  | 0  | 1  | 1  | 9.68 #  |  | 0  | 0  | 0  | 0  |         |
| 257467492 | 2210021J22Rik | hypothetical protein LOC72355           | 0  | 0  | 2  | 2  | 0.12    |  | 0  | 0  | 0  | 0  |         |
| 39930441  | 2210016L21Rik | hypothetical protein LOC72357           | 4  | 5  | 3  | 12 | 0.04    |  | 0  | 0  | 0  | 0  |         |
| 198278498 | 2700029M09Rik | hypothetical protein LOC72612           | 7  | 14 | 7  | 28 | 0.17    |  | 0  | 1  | 0  | 1  | -0.98 # |
| 139948818 | Fam98a        | hypothetical protein LOC72722           | 1  | 3  | 4  | 8  | -0.29   |  | 0  | 0  | 0  | 0  |         |
| 28849885  | Fam76b        | hypothetical protein LOC72826           | 4  | 11 | 10 | 25 | -0.01   |  | 0  | 0  | 0  | 0  |         |
| 153791468 | 3110003A17Rik | hypothetical protein LOC73112           | 1  | 0  | 2  | 3  | -0.11   |  | 3  | 1  | 3  | 7  | -0.02   |
| 146134371 | 3110082I17Rik | hypothetical protein LOC73212           | 5  | 5  | 10 | 20 | -0.13   |  | 5  | 6  | 5  | 16 | -0.01   |
| 28077031  | 4931414P19Rik | hypothetical protein LOC74359 precursor | 1  | 1  | 1  | 3  | 1.16 #  |  | 0  | 0  | 0  | 0  |         |
| 124487358 | 1700009N14Rik | hypothetical protein LOC75471           | 0  | 0  | 0  | 0  |         |  | 0  | 0  | 5  | 5  | -0.10   |
| 254939620 | 2410003K15Rik | hypothetical protein LOC75593           | 0  | 0  | 1  | 1  | -0.40   |  | 0  | 0  | 0  | 0  |         |
| 198278417 | 1700029F09Rik | hypothetical protein LOC75623           | 2  | 7  | 1  | 10 | -0.45   |  | 0  | 0  | 0  | 0  |         |
| 256000814 | 4933432B09Rik | hypothetical protein LOC75729           | 3  | 0  | 1  | 4  | -3.93 # |  | 0  | 1  | 1  | 2  | -1.71 # |
| 113461996 | 6330578E17Rik | hypothetical protein LOC76178           | 4  | 6  | 6  | 16 | -0.06   |  | 0  | 0  | 1  | 1  | 0.17    |
| 21313286  | Fam54b        | hypothetical protein LOC76824           | 0  | 0  | 0  | 0  |         |  | 0  | 2  | 0  | 2  | 0.39    |
| 244790037 | 2610029I01Rik | hypothetical protein LOC77032           | 1  | 0  | 0  | 1  | -0.28   |  | 0  | 0  | 0  | 0  |         |
| 166063959 | C330007P06Rik | hypothetical protein LOC77644           | 5  | 10 | 8  | 23 | 0.10    |  | 0  | 5  | 3  | 8  | 0.30    |
| 21704218  | 8430410K20Rik | hypothetical protein LOC78100           | 1  | 0  | 0  | 1  | 0.43    |  | 0  | 0  | 0  | 0  |         |
| 31044487  | B230219D22Rik | hypothetical protein LOC78521           | 13 | 7  | 6  | 26 | 0.15    |  | 10 | 9  | 14 | 33 | 0.03    |

|           |               |                                                                            |    |    |    |     |          |     |     |     |     |         |  |
|-----------|---------------|----------------------------------------------------------------------------|----|----|----|-----|----------|-----|-----|-----|-----|---------|--|
| 117935034 | 1700061G19Rik | hypothetical protein LOC78625                                              | 0  | 1  | 0  | 1   | -10.16 # | 0   | 0   | 0   | 0   |         |  |
| 13384892  | BC003266      | hypothetical protein LOC80284                                              | 0  | 0  | 1  | 1   | 0.13     | 0   | 0   | 0   | 0   |         |  |
| 75677516  | C77080        | hypothetical protein LOC97130                                              | 3  | 0  | 1  | 4   | -0.41    | 0   | 0   | 0   | 0   |         |  |
| 247300747 | A430005L14Rik | hypothetical protein LOC97159 isoform 1                                    | 1  | 5  | 4  | 10  | 0.31     | 0   | 0   | 4   | 4   | 0.07    |  |
| 247300872 | A430005L14Rik | hypothetical protein LOC97159 isoform 2                                    | 0  | 0  | 0  | 0   |          | 0   | 2   | 0   | 2   | 0.00    |  |
| 85701612  | AU015228      | hypothetical protein LOC99169                                              | 2  | 2  | 3  | 7   | 0.11     | 0   | 1   | 1   | 2   | 0.36    |  |
| 157951706 | Hyou1         | hypoxia up-regulated protein 1 precursor                                   | 32 | 7  | 29 | 68  | -0.16    | 0   | 0   | 0   | 0   |         |  |
| 13384796  | Ier3ip1       | immediate early response 3-interacting protein 1                           | 1  | 2  | 0  | 3   | -0.58 #  | 6   | 0   | 0   | 6   | -0.30   |  |
| 30455605  | Igbbp1        | immunoglobulin-binding protein 1                                           | 0  | 1  | 0  | 1   | 0.45     | 0   | 0   | 1   | 1   | 0.04    |  |
| 31543047  | Kpna1         | importin subunit alpha-1                                                   | 11 | 14 | 5  | 30  | 0.06     | 0   | 8   | 5   | 13  | 0.11    |  |
| 149268945 | Gm10184       | importin subunit alpha-2-like isoform 1                                    | 18 | 11 | 11 | 40  | 0.22     | 2   | 8   | 4   | 14  | 0.16    |  |
| 6680596   | Kpna3         | importin subunit alpha-3                                                   | 14 | 6  | 13 | 33  | 0.13     | 0   | 7   | 5   | 12  | 0.38    |  |
| 6680598   | Kpna4         | importin subunit alpha-4                                                   | 18 | 20 | 24 | 62  | 0.23     | 11  | 23  | 19  | 53  | 0.25 *  |  |
| 227116300 | Kpna6         | importin subunit alpha-7                                                   | 3  | 7  | 8  | 18  | 0.08     | 7   | 18  | 12  | 37  | 0.00    |  |
| 88014720  | Kpnb1         | importin subunit beta-1                                                    | 77 | 87 | 61 | 225 | 0.14 *   | 160 | 184 | 266 | 610 | 0.11    |  |
| 19745156  | Ipo4          | importin-4                                                                 | 0  | 0  | 0  | 0   |          | 0   | 0   | 1   | 1   | -0.21   |  |
| 29789199  | Ipo5          | importin-5                                                                 | 0  | 0  | 0  | 0   |          | 0   | 0   | 1   | 1   | -0.69 # |  |
| 74229034  | Ipo7          | importin-7                                                                 | 0  | 0  | 0  | 0   |          | 0   | 0   | 1   | 1   | -0.37   |  |
| 112734861 | Ipo9          | importin-9                                                                 | 0  | 0  | 0  | 0   |          | 0   | 0   | 15  | 15  | -0.13   |  |
| 19527166  | Vrk3          | inactive serine/threonine-protein kinase VRK3                              | 16 | 24 | 17 | 57  | 0.05     | 1   | 11  | 11  | 23  | -0.04   |  |
| 55769581  | Inadl         | inaD-like protein isoform 2                                                | 0  | 1  | 0  | 1   | 1.93 #   | 0   | 1   | 0   | 1   | 1.15 #  |  |
| 6678281   | Inmt          | indolethylamine N-methyltransferase                                        | 0  | 0  | 0  | 0   |          | 0   | 2   | 0   | 2   | 0.66 #  |  |
| 29336057  | Ing1          | inhibitor of growth protein 1                                              | 4  | 4  | 2  | 10  | 0.19     | 0   | 1   | 0   | 1   | 0.39    |  |
| 31542996  | Ing2          | inhibitor of growth protein 2                                              | 2  | 3  | 1  | 6   | 0.07     | 0   | 0   | 0   | 0   |         |  |
| 139948756 | Ing3          | inhibitor of growth protein 3                                              | 1  | 1  | 1  | 3   | 0.68 *,# | 0   | 0   | 0   | 0   |         |  |
| 19111152  | Ing4          | inhibitor of growth protein 4                                              | 0  | 1  | 1  | 2   | 0.02     | 0   | 6   | 7   | 13  | -0.01   |  |
| 21313552  | Ing5          | inhibitor of growth protein 5                                              | 4  | 1  | 1  | 6   | -0.22    | 2   | 9   | 11  | 22  | -0.07   |  |
| 153792192 | Incnp         | inner centromere protein                                                   | 0  | 0  | 0  | 0   |          | 1   | 1   | 3   | 5   | 0.14 *  |  |
| 145864461 | Lemd3         | inner nuclear membrane protein Man1                                        | 6  | 22 | 27 | 55  | 0.01     | 31  | 36  | 61  | 128 | -0.08   |  |
| 12963729  | Ino80b        | INO80 complex subunit B                                                    | 1  | 0  | 1  | 2   | 0.43     | 0   | 0   | 0   | 0   |         |  |
| 27369894  | Ino80c        | INO80 complex subunit C                                                    | 13 | 29 | 11 | 53  | 0.09     | 0   | 1   | 0   | 1   | 0.22    |  |
| 23956376  | Ino80e        | INO80 complex subunit E                                                    | 6  | 6  | 7  | 19  | 0.10     | 0   | 0   | 2   | 2   | 0.04    |  |
| 27754065  | Ppa1          | inorganic pyrophosphatase                                                  | 0  | 0  | 0  | 0   |          | 0   | 1   | 1   | 2   | -1.37 # |  |
| 22203753  | Ppa2          | inorganic pyrophosphatase 2, mitochondrial precursor                       | 5  | 0  | 2  | 7   | -0.32    | 0   | 0   | 0   | 0   |         |  |
| 31982664  | Itpa          | inosine triphosphate pyrophosphatase                                       | 1  | 1  | 1  | 3   | 0.14     | 0   | 1   | 0   | 1   | 0.39    |  |
| 31981382  | Impdh2        | inosine-5'-monophosphate dehydrogenase 2                                   | 1  | 0  | 1  | 2   | 0.34     | 0   | 2   | 4   | 6   | -0.41   |  |
| 61102728  | Itp3          | inositol 1,4,5-trisphosphate receptor type 3                               | 2  | 2  | 2  | 6   | -0.18    | 3   | 1   | 34  | 38  | 0.11    |  |
| 166706913 | Ppip5k2       | inositol hexakisphosphate and diphosphoinositol-pentakisphosphate kinase 2 | 0  | 3  | 0  | 3   | 0.95 #   | 0   | 0   | 0   | 0   |         |  |
| 6753518   | Igf2bp1       | insulin-like growth factor 2 mRNA-binding protein 1                        | 1  | 6  | 3  | 10  | -0.21    | 0   | 0   | 0   | 0   |         |  |
| 145207996 | Igf2bp2       | insulin-like growth factor 2 mRNA-binding protein 2                        | 9  | 14 | 6  | 29  | -0.09    | 2   | 9   | 12  | 23  | 0.52 #  |  |
| 226958445 | Igfbp7        | insulin-like growth factor-binding protein 7 isoform 2                     | 3  | 7  | 9  | 19  | -0.35    | 0   | 0   | 0   | 0   |         |  |
| 294832004 | Ints1         | integrator complex subunit 1                                               | 37 | 69 | 65 | 171 | 0.23     | 5   | 38  | 26  | 69  | -2.13 # |  |
| 27229115  | Ints10        | integrator complex subunit 10                                              | 7  | 8  | 6  | 21  | 0.33     | 0   | 4   | 1   | 5   | 0.18    |  |
| 21312614  | Cpsf3l        | integrator complex subunit 11                                              | 2  | 6  | 2  | 10  | 0.16     | 0   | 3   | 1   | 4   | 0.22    |  |
| 21313674  | Ints12        | integrator complex subunit 12                                              | 7  | 2  | 7  | 16  | 0.14     | 1   | 4   | 4   | 9   | 0.53 #  |  |
| 86476084  | Ints2         | integrator complex subunit 2                                               | 16 | 13 | 17 | 46  | 0.44 *   | 1   | 21  | 13  | 35  | 0.14    |  |
| 31652266  | Ints3         | integrator complex subunit 3                                               | 17 | 34 | 23 | 74  | 0.30     | 0   | 31  | 8   | 39  | 0.31    |  |
| 30794414  | Ints4         | integrator complex subunit 4                                               | 8  | 19 | 19 | 46  | 0.33 *   | 0   | 30  | 14  | 44  | 0.22    |  |

|           |                |                                                                               |    |    |    |     |         |     |     |     |     |        |
|-----------|----------------|-------------------------------------------------------------------------------|----|----|----|-----|---------|-----|-----|-----|-----|--------|
| 28849895  | Ints5          | integrator complex subunit 5                                                  | 0  | 3  | 4  | 7   | 0.34    | 0   | 6   | 0   | 6   | 0.67#  |
| 51467749  | Ints6          | integrator complex subunit 6                                                  | 2  | 13 | 16 | 31  | 0.35    | 0   | 9   | 4   | 13  | 0.24   |
| 153791768 | Ints7          | integrator complex subunit 7                                                  | 7  | 20 | 13 | 40  | 0.18    | 0   | 35  | 15  | 50  | 0.19   |
| 227430333 | Ints8          | integrator complex subunit 8                                                  | 0  | 8  | 6  | 14  | 0.40*   | 0   | 8   | 1   | 9   | 0.23   |
| 31981980  | Ints9          | integrator complex subunit 9                                                  | 5  | 12 | 7  | 24  | 0.01    | 3   | 6   | 0   | 9   | 0.70#  |
| 7305189   | Itga3          | integrin alpha-3                                                              | 1  | 0  | 2  | 3   | -0.48*  | 0   | 4   | 18  | 22  | 0.27   |
| 31982236  | Itga6          | integrin alpha-6                                                              | 0  | 0  | 0  | 0   |         | 0   | 1   | 18  | 19  | 0.00   |
| 154240716 | Itgav          | integrin alpha-V precursor                                                    | 2  | 0  | 0  | 2   | -0.67#  | 1   | 0   | 3   | 4   | -1.51# |
| 45504394  | Itgb1          | integrin beta-1 precursor                                                     | 4  | 0  | 1  | 5   | -0.30*  | 7   | 4   | 25  | 36  | 0.20   |
| 110735428 | Itgb4          | integrin beta-4 isoform 2                                                     | 0  | 0  | 0  | 0   |         | 0   | 0   | 6   | 6   | 0.21   |
| 39930415  | Ilkap          | integrin-linked kinase-associated serine/threonine phosphatase 2C             | 0  | 1  | 0  | 1   | 0.43    | 0   | 0   | 0   | 0   |        |
| 240255653 | Ilk            | integrin-linked protein kinase                                                | 5  | 8  | 2  | 15  | -0.04   | 0   | 4   | 5   | 9   | 0.25   |
| 27734112  | 9930111J21Rik2 | interferon inducible GTPase                                                   | 0  | 1  | 0  | 1   | 9.84#   | 0   | 0   | 0   | 0   |        |
| 162287051 | Irf2           | interferon regulatory factor 2                                                | 1  | 3  | 1  | 5   | -0.07   | 0   | 0   | 0   | 0   |        |
| 22003884  | 6430527G18Rik  | interferon regulatory factor 2-binding protein-like                           | 4  | 3  | 7  | 14  | 0.33    | 0   | 1   | 0   | 1   | 0.65#  |
| 164519150 | Ifi202b        | interferon-activable protein 202                                              | 0  | 0  | 0  | 0   |         | 0   | 0   | 1   | 1   | 0.38   |
| 309261908 | LOC100044068   | interferon-activable protein 202-like                                         | 0  | 0  | 0  | 0   |         | 0   | 4   | 0   | 4   | 0.29   |
| 21312544  | Ifi35          | interferon-induced 35 kDa protein homolog                                     | 4  | 4  | 4  | 12  | 0.29    | 0   | 0   | 0   | 0   |        |
| 6755160   | Eif2ak2        | interferon-induced, double-stranded RNA-activated protein kinase              | 0  | 2  | 1  | 3   | 0.31    | 0   | 0   | 0   | 0   |        |
| 6755162   | Prkra          | interferon-inducible double stranded RNA-dependent protein kinase activator A | 0  | 0  | 0  | 0   |         | 0   | 1   | 0   | 1   | -0.12  |
| 29244084  | Isg20l2        | interferon-stimulated 20 kDa exonuclease-like 2                               | 6  | 2  | 1  | 9   | -0.01   | 26  | 12  | 20  | 58  | -0.03  |
| 15805028  | Isg20          | interferon-stimulated gene 20 kDa protein                                     | 5  | 7  | 5  | 17  | -0.08   | 0   | 0   | 1   | 1   | -0.02  |
| 13385872  | Ilf2           | interleukin enhancer-binding factor 2                                         | 55 | 66 | 62 | 183 | 0.00    | 132 | 88  | 96  | 316 | -0.03* |
| 111607432 | Ilf3           | interleukin enhancer-binding factor 3 isoform 2                               | 59 | 99 | 89 | 247 | 0.02    | 90  | 146 | 113 | 349 | -0.04  |
| 111607436 | Ilf3           | interleukin enhancer-binding factor 3 isoform 4                               | 0  | 0  | 1  | 1   | 0.03    | 0   | 11  | 42  | 53  | 0.18   |
| 134288904 | Itns1          | intersectin-1 isoform 1                                                       | 0  | 1  | 0  | 1   | 0.16    | 0   | 0   | 0   | 0   |        |
| 163644327 | Aqr            | intron-binding protein aquarius                                               | 16 | 34 | 31 | 81  | 0.08    | 8   | 121 | 112 | 241 | 0.11   |
| 189491859 | Iqch           | IQ domain-containing protein H                                                | 0  | 0  | 0  | 0   |         | 1   | 0   | 0   | 1   | 9.98#  |
| 118344446 | Iqgap3         | IQ motif containing GTPase activating protein 3                               | 1  | 0  | 0  | 1   | -10.10# | 0   | 0   | 0   | 0   |        |
| 149264021 | AK157302       | iron-sulfur cluster assembly 1 homolog, mitochondrial                         | 0  | 0  | 1  | 1   | -0.29   | 0   | 0   | 0   | 0   |        |
| 254039596 | IscA2          | iron-sulfur cluster assembly 2 homolog, mitochondrial precursor               | 10 | 0  | 12 | 22  | -0.10   | 0   | 0   | 0   | 0   |        |
| 21313484  | Iscu           | iron-sulfur cluster assembly enzyme ISCU, mitochondrial precursor             | 6  | 5  | 4  | 15  | -0.03   | 0   | 0   | 0   | 0   |        |
| 225703114 | Hscb           | iron-sulfur cluster co-chaperone protein HscB, mitochondrial precursor        | 1  | 0  | 0  | 1   | -0.57#  | 0   | 0   | 0   | 0   |        |
| 167234411 | Nubpl          | iron-sulfur protein NUBPL                                                     | 2  | 1  | 1  | 4   | 0.00    | 0   | 1   | 2   | 3   | -0.06  |
| 118403322 | Acad8          | isobutyryl-CoA dehydrogenase, mitochondrial precursor                         | 7  | 6  | 1  | 14  | -0.08   | 0   | 0   | 0   | 0   |        |
| 197333728 | Isoc2a         | isochorismatase domain-containing protein 2A, mitochondrial precursor         | 1  | 0  | 0  | 1   | -0.79#  | 0   | 0   | 0   | 0   |        |
| 18250284  | Ildh3a         | isocitrate dehydrogenase [NAD] subunit alpha, mitochondrial precursor         | 18 | 2  | 4  | 24  | -0.16*  | 0   | 3   | 6   | 9   | -0.45# |
| 6680345   | Ildh3g         | isocitrate dehydrogenase [NAD] subunit gamma 1, mitochondrial precursor       | 4  | 0  | 0  | 4   | -0.17   | 0   | 0   | 0   | 0   |        |
| 225579033 | Ildh2          | isocitrate dehydrogenase [NADP], mitochondrial precursor                      | 29 | 13 | 21 | 63  | -0.14*  | 9   | 18  | 34  | 61  | -0.16  |
| 18700024  | Ildh3b         | isocitrate dehydrogenase 3, beta subunit                                      | 11 | 11 | 10 | 32  | -0.11   | 0   | 9   | 15  | 24  | -0.13  |
| 38490690  | Iars2          | isoleucyl-tRNA synthetase, mitochondrial precursor                            | 2  | 0  | 0  | 2   | 1.31#   | 0   | 0   | 3   | 3   | 0.05   |



|           |               |                                                                             |     |     |     |     |         |     |     |     |      |        |     |
|-----------|---------------|-----------------------------------------------------------------------------|-----|-----|-----|-----|---------|-----|-----|-----|------|--------|-----|
| 281604088 | Idi1          | isopentenyl-diphosphate Delta-isomerase 1                                   | 5   | 2   | 2   | 9   | -0.09   | 0   | 0   | 0   | 0    |        |     |
| 21312626  | 2400003C14Rik | IST1 homolog                                                                | 0   | 2   | 4   | 6   | -0.56   | 0   | 0   | 0   | 0    |        |     |
| 28395018  | Jup           | junction plakoglobin                                                        | 8   | 20  | 8   | 36  | 0.33    | 81  | 87  | 151 | 319  | 0.70   | *,# |
| 47078285  | Kdelc2        | KDEL (Lys-Asp-Glu-Leu) containing 2 protein                                 | 3   | 1   | 0   | 4   | -0.09   | 0   | 0   | 0   | 0    |        |     |
| 12963767  | Kdelc1        | KDEL motif-containing protein 1 precursor                                   | 4   | 0   | 1   | 5   | -0.01   | 0   | 0   | 0   | 0    |        |     |
| 6754480   | Krt13         | keratin, type I cytoskeletal 13                                             | 1   | 6   | 0   | 7   | -2.40#  | 0   | 5   | 19  | 24   | -0.78# |     |
| 21489935  | Krt14         | keratin, type I cytoskeletal 14                                             | 2   | 5   | 3   | 10  | -1.63#  | 0   | 0   | 13  | 13   | -5.70# |     |
| 6680604   | Krt16         | keratin, type I cytoskeletal 16                                             | 0   | 0   | 1   | 1   | -5.80#  | 0   | 0   | 5   | 5    | -6.44# |     |
| 7106335   | Krt17         | keratin, type I cytoskeletal 17                                             | 12  | 0   | 17  | 29  | -0.50   | 36  | 30  | 39  | 105  | 0.49   | *,# |
| 254540068 | Krt18         | keratin, type I cytoskeletal 18                                             | 142 | 229 | 132 | 503 | 0.50    | 812 | 638 | 623 | 2073 | 0.75   | *,# |
| 6680606   | Krt19         | keratin, type I cytoskeletal 19                                             | 95  | 129 | 105 | 329 | 0.56*   | 623 | 489 | 511 | 1623 |        |     |
| 21592285  | Krt20         | keratin, type I cytoskeletal 20                                             | 32  | 58  | 52  | 142 | 0.72*,# | 197 | 214 | 275 | 686  | 0.58#  |     |
| 154090941 | Krt42         | keratin, type I cytoskeletal 42                                             | 2   | 7   | 3   | 12  | -1.92#  | 35  | 0   | 33  | 68   | -0.24  |     |
| 126116585 | Krt1          | keratin, type II cytoskeletal 1                                             | 0   | 0   | 0   | 0   |         | 8   | 0   | 0   | 8    | -6.27# |     |
| 51092293  | Krt77         | keratin, type II cytoskeletal 1b                                            | 4   | 5   | 0   | 9   | 0.05    | 10  | 0   | 0   | 10   | -5.69# |     |
| 124487419 | Krt2          | keratin, type II cytoskeletal 2 epidermal                                   | 0   | 0   | 0   | 0   |         | 0   | 1   | 8   | 9    | 2.40#  |     |
| 20911031  | Krt5          | keratin, type II cytoskeletal 5                                             | 20  | 21  | 4   | 45  | -1.89#  | 9   | 29  | 26  | 64   | -2.57# |     |
| 54607171  | Krt6a         | keratin, type II cytoskeletal 6A                                            | 0   | 0   | 0   | 0   |         | 0   | 0   | 9   | 9    | -8.37# |     |
| 14861854  | Krt7          | keratin, type II cytoskeletal 7                                             | 89  | 121 | 89  | 299 | 0.65#   | 737 | 658 | 695 | 2090 | 0.70#  |     |
| 9910294   | Krt71         | keratin, type II cytoskeletal 71                                            | 2   | 4   | 4   | 10  | -0.83#  | 14  | 19  | 23  | 56   | -0.68# |     |
| 47059013  | Krt73         | keratin, type II cytoskeletal 73                                            | 0   | 3   | 0   | 3   | 4.37#   | 4   | 0   | 0   | 4    | -5.64# |     |
| 29789317  | Krt75         | keratin, type II cytoskeletal 75                                            | 0   | 5   | 7   | 12  | 1.85#   | 20  | 4   | 7   | 31   | 0.65#  |     |
| 22164776  | Krt79         | keratin, type II cytoskeletal 79                                            | 0   | 5   | 3   | 8   | 0.32    | 4   | 5   | 15  | 24   | -1.59# |     |
| 114145561 | Krt8          | keratin, type II cytoskeletal 8                                             | 176 | 224 | 180 | 580 | 0.71*,# | 992 | 994 | ### | 3006 | 0.64   | *,# |
| 13384696  | Krtcap2       | keratinocyte-associated protein 2                                           | 4   | 0   | 1   | 5   | -0.42   | 9   | 0   | 3   | 12   | -0.30  |     |
| 110626031 | Khdrbs1       | KH domain-containing, RNA-binding, signal transduction-associated protein 1 | 50  | 62  | 37  | 149 | -0.08   | 42  | 42  | 23  | 107  | 0.03   |     |
| 144922638 | Ktn1          | kinectin                                                                    | 3   | 9   | 11  | 23  | -0.23   | 0   | 0   | 0   | 0    |        |     |
| 256985168 | Kif23         | kinesin family member 23                                                    | 0   | 0   | 0   | 0   |         | 0   | 3   | 18  | 21   | -0.13  |     |
| 61657921  | Kif5b         | kinesin-1 heavy chain                                                       | 26  | 16  | 7   | 49  | -0.01   | 1   | 12  | 29  | 42   | -0.09  |     |
| 124487163 | Kif13b        | kinesin-like protein KIF13B                                                 | 0   | 2   | 0   | 2   | 0.16    | 0   | 1   | 11  | 12   | -0.15  |     |
| 6679597   | Kif20a        | kinesin-like protein KIF20A                                                 | 0   | 0   | 0   | 0   |         | 0   | 2   | 1   | 3    | 0.25   |     |
| 133505571 | Kif20b        | kinesin-like protein KIF20B                                                 | 25  | 8   | 2   | 35  | 0.14    | 0   | 0   | 0   | 0    |        |     |
| 21704182  | Kif22         | kinesin-like protein KIF22                                                  | 1   | 1   | 0   | 2   | 0.11    | 0   | 1   | 0   | 1    | 0.31   |     |
| 224809373 | Kif2a         | kinesin-like protein KIF2A isoform 2                                        | 1   | 1   | 3   | 5   | 0.14    | 0   | 0   | 0   | 0    |        |     |
| 309261975 | LOC100044006  | kinesin-like protein KIFC1-like                                             | 3   | 2   | 2   | 7   | 0.47*   | 1   | 0   | 0   | 1    | -5.29# |     |
| 254540034 | Dsn1          | kinetochore-associated protein DSN1 homolog                                 | 0   | 0   | 1   | 1   | -0.34   | 0   | 0   | 0   | 0    |        |     |
| 213512857 | Nsl1          | kinetochore-associated protein NSL1 homolog                                 | 2   | 3   | 2   | 7   | -0.45   | 0   | 2   | 1   | 3    | 0.40   |     |
| 254911014 | Klraq1        | KLRAQ motif-containing protein 1                                            | 0   | 0   | 1   | 1   | 0.07    | 0   | 0   | 0   | 0    |        |     |
| 226442952 | Krr1          | KRR1 small subunit processome component homolog                             | 3   | 6   | 6   | 15  | 0.03    | 4   | 6   | 11  | 21   | 0.00   |     |
| 144922690 | Klf16         | Krueppel-like factor 16                                                     | 0   | 1   | 0   | 1   | 0.29    | 0   | 0   | 0   | 0    |        |     |
| 6680582   | Klf3          | Krueppel-like factor 3                                                      | 1   | 0   | 0   | 1   | 0.07    | 0   | 0   | 0   | 0    |        |     |
| 31981873  | Klf5          | Krueppel-like factor 5                                                      | 4   | 5   | 1   | 10  | -0.46*  | 0   | 1   | 0   | 1    | 0.12   |     |
| 124487297 | Lct           | lactase-phlorizin hydrolase preproprotein                                   | 0   | 2   | 0   | 2   | 9.55#   | 0   | 0   | 0   | 0    |        |     |
| 51921295  | A4galt        | lactosylceramide 4-alpha-galactosyltransferase                              | 0   | 0   | 1   | 1   | 0.13    | 0   | 0   | 0   | 0    |        |     |
| 31981555  | Lad1          | ladinin-1                                                                   | 70  | 60  | 44  | 174 | -0.02   | 0   | 4   | 5   | 9    | 0.32   |     |
| 22095015  | Lass2         | LAG1 longevity assurance homolog 2                                          | 2   | 0   | 1   | 3   | -0.27   | 3   | 1   | 1   | 5    | -0.52  | *,# |
| 121949760 | Tmpo          | lamina-associated polypeptide 2 isoform alpha                               | 217 | 264 | 310 | 791 | 0.16    | 250 | 187 | 386 | 823  | 0.23   | *   |
| 121949767 | Tmpo          | lamina-associated polypeptide 2 isoform delta                               | 139 | 161 | 320 | 620 | -0.03   | 0   | 155 | 250 | 405  | 0.07   |     |

|           |            |                                                                           |     |     |     |     |        |     |     |     |      |       |       |   |
|-----------|------------|---------------------------------------------------------------------------|-----|-----|-----|-----|--------|-----|-----|-----|------|-------|-------|---|
| 121949765 | Tmpo       | lamina-associated polypeptide 2 isoform epsilon                           | 128 | 146 | 290 | 564 | -0.07  | 418 | 199 | 225 | 842  | -0.02 |       |   |
| 229608895 | Lbr        | lamin-B receptor                                                          | 10  | 11  | 10  | 31  | -0.02  | 142 | 169 | 176 | 487  | -0.07 | *     |   |
| 188219589 | Lmnb1      | lamin-B1                                                                  | 114 | 175 | 117 | 406 | -0.32  | ### | 748 | 776 | 2603 | -0.08 | *     |   |
| 113195686 | Lmnb2      | lamin-B2                                                                  | 41  | 94  | 51  | 186 | -0.04  | 369 | 330 | 323 | 1022 | -0.04 |       |   |
| 226423935 | Lama3      | laminin subunit alpha-3                                                   | 0   | 0   | 0   | 0   |        | 0   | 0   | 69  | 69   | -0.44 |       |   |
| 114326497 | Lamb1      | laminin subunit beta-1                                                    | 22  | 9   | 14  | 45  | -0.33  | 0   | 0   | 0   | 0    |       |       |   |
| 113865981 | Lamb3      | laminin subunit beta-3 precursor                                          | 0   | 0   | 0   | 0   |        | 0   | 2   | 318 | 320  | -0.60 | #     |   |
| 110624798 | Lamc2      | laminin subunit gamma-2                                                   | 1   | 0   | 2   | 3   | -0.42  | 0   | 0   | 174 | 174  | -0.41 |       |   |
| 227500024 | Lao1       | L-amino acid oxidase 1                                                    | 1   | 0   | 0   | 1   | -10.10 | #   | 0   | 0   | 0    | 0     |       |   |
| 71061451  | Cyp51      | lanosterol 14-alpha demethylase                                           | 2   | 0   | 0   | 2   | -0.42  | 0   | 0   | 0   | 0    |       |       |   |
| 22122469  | Lss        | lanosterol synthase                                                       | 2   | 0   | 0   | 2   | -0.27  | 0   | 0   | 0   | 0    |       |       |   |
| 110665742 | Larp7      | la-related protein 7                                                      | 13  | 12  | 17  | 42  | -0.06  | 27  | 31  | 70  | 128  | -0.05 |       |   |
| 71979675  | Las1l      | LAS1-like                                                                 | 8   | 7   | 11  | 26  | 0.22   | *   | 1   | 10  | 6    | 17    | 0.32  |   |
| 31980632  | Lxn        | latexin                                                                   | 1   | 0   | 0   | 1   | 0.07   | 0   | 0   | 1   | 1    | 0.07  |       |   |
| 228480219 | Mesdc2     | LDLR chaperone MESD                                                       | 10  | 4   | 5   | 19  | -0.01  | 0   | 0   | 0   | 0    |       |       |   |
| 7242187   | Lgmn       | legumain precursor                                                        | 4   | 4   | 5   | 13  | 0.09   | 0   | 2   | 3   | 5    | 0.10  |       |   |
| 165972321 | Lemd2      | LEM domain-containing protein 2                                           | 2   | 1   | 2   | 5   | -0.26  | 8   | 26  | 20  | 54   | 0.00  |       |   |
| 6678696   | Ligl1      | lethal(2) giant larvae protein homolog 1 isoform 2                        | 0   | 1   | 0   | 1   | 0.89   | #   | 0   | 0   | 0    | 0     |       |   |
| 144922656 | Ligl2      | lethal(2) giant larvae protein homolog 2                                  | 0   | 7   | 1   | 8   | 0.12   | 0   | 0   | 1   | 1    | 0.06  |       |   |
| 9789997   | Letm1      | LETM1 and EF-hand domain-containing protein 1, mitochondrial precursor    | 5   | 4   | 1   | 10  | 0.13   | 0   | 0   | 0   | 0    |       |       |   |
| 194473729 | Lzts2      | leucine zipper putative tumor suppressor 2                                | 0   | 0   | 0   | 0   |        | 0   | 1   | 0   | 1    | 6.75  | #     |   |
| 134031976 | Lrpprc     | leucine-rich PPR motif-containing protein, mitochondrial precursor        | 35  | 7   | 6   | 48  | -0.07  | 0   | 3   | 12  | 15   | -0.36 |       |   |
| 166851848 | Lrwd1      | leucine-rich repeat and WD repeat-containing protein 1                    | 3   | 10  | 3   | 16  | 0.39   | 1   | 11  | 8   | 20   | -0.20 | *     |   |
| 162417949 | Lrrfp1     | leucine-rich repeat flightless-interacting protein 1 isoform 1            | 0   | 0   | 3   | 3   | -0.06  | 0   | 0   | 0   | 0    |       |       |   |
| 110625827 | Lrrfp2     | leucine-rich repeat flightless-interacting protein 2 isoform 2            | 6   | 15  | 10  | 31  | 0.21   | 0   | 0   | 0   | 0    |       |       |   |
| 270341361 | Shoc2      | leucine-rich repeat protein SHOC-2                                        | 2   | 5   | 0   | 7   | 0.37   | 0   | 0   | 0   | 0    |       |       |   |
| 225690587 | Lrrc1      | leucine-rich repeat-containing protein 1 isoform 1                        | 0   | 1   | 0   | 1   | 0.40   | 0   | 1   | 0   | 1    | 0.44  |       |   |
| 225690585 | Lrrc1      | leucine-rich repeat-containing protein 1 isoform 2                        | 0   | 1   | 0   | 1   | 0.60   | #   | 0   | 0   | 1    | 1     | 0.04  |   |
| 154146185 | Lrrc16a    | leucine-rich repeat-containing protein 16A                                | 2   | 3   | 1   | 6   | 0.34   | *   | 0   | 1   | 0    | 1     | -1.61 | # |
| 31541911  | Lrrc40     | leucine-rich repeat-containing protein 40                                 | 1   | 2   | 3   | 6   | 0.09   | 0   | 2   | 0   | 2    | 0.59  | #     |   |
| 41152116  | Lrrc47     | leucine-rich repeat-containing protein 47                                 | 0   | 6   | 2   | 8   | 0.29   | 0   | 0   | 0   | 0    |       |       |   |
| 19527026  | Lrrc59     | leucine-rich repeat-containing protein 59                                 | 40  | 37  | 26  | 103 | -0.36  | *   | 5   | 5   | 6    | 16    | -0.42 | * |
| 68299752  | Lrig2      | leucine-rich repeats and immunoglobulin-like domains protein 2 precursor  | 0   | 0   | 0   | 0   |        | 0   | 0   | 1   | 1    | 4.94  | #     |   |
| 120537241 | Lars       | leucyl-tRNA synthetase, cytoplasmic                                       | 0   | 0   | 0   | 0   |        | 0   | 0   | 2   | 2    | 0.27  |       |   |
| 27370082  | Leng8      | leukocyte receptor cluster member 8 homolog                               | 0   | 0   | 1   | 1   | -2.53  | #   | 0   | 0   | 0    | 0     |       |   |
| 6754382   | Cd47       | leukocyte surface antigen CD47                                            | 0   | 0   | 4   | 4   | -0.08  | 0   | 3   | 3   | 6    | 0.27  |       |   |
| 116734870 | Lta4h      | leukotriene A-4 hydrolase                                                 | 0   | 0   | 0   | 0   |        | 0   | 0   | 1   | 1    | -0.21 |       |   |
| 56090602  | D8Ertd738e | leydig cell tumor 10 kDa protein homolog                                  | 2   | 1   | 0   | 3   | -0.18  | 0   | 0   | 0   | 0    |       |       |   |
| 26024345  | Lcor       | ligand-dependent corepressor                                              | 0   | 0   | 0   | 0   |        | 0   | 1   | 0   | 1    | -2.53 | #     |   |
| 84794647  | Lims1      | LIM and senescent cell antigen-like-containing domain protein 1 isoform 1 | 6   | 14  | 12  | 32  | -0.01  | 0   | 2   | 2   | 4    | 0.10  |       |   |
| 6754508   | Lasp1      | LIM and SH3 domain protein 1                                              | 10  | 4   | 4   | 18  | 0.11   | 0   | 0   | 0   | 0    |       |       |   |
| 158518433 | Lima1      | LIM domain and actin-binding protein 1 isoform b                          | 13  | 36  | 16  | 65  | 0.31   | 8   | 18  | 19  | 45   | 0.60  | *,#   |   |
| 157311641 | Lmo7       | LIM domain only 7                                                         | 2   | 3   | 2   | 7   | -0.45  | 0   | 0   | 0   | 0    |       |       |   |
| 254939582 | Lmf1       | lipase maturation factor 1                                                | 0   | 0   | 1   | 1   | 1.78   | #   | 0   | 3   | 5    | 8     | -0.15 |   |
| 30725786  | Lmf2       | lipase maturation factor 2                                                | 9   | 1   | 3   | 13  | -0.28  | 3   | 2   | 0   | 5    | -0.27 |       |   |

|           |               |                                                                                                            |    |    |    |     |         |     |     |     |     |         |
|-----------|---------------|------------------------------------------------------------------------------------------------------------|----|----|----|-----|---------|-----|-----|-----|-----|---------|
| 170172520 | Dbt           | lipoamide acyltransferase component of branched-chain alpha-keto acid dehydrogenase complex, mitochondrial | 21 | 33 | 33 | 87  | -0.01   | 0   | 15  | 13  | 28  | -0.19   |
| 117956397 | Lrba          | lipopolysaccharide-responsive and beige-like anchor protein isoform beta                                   | 0  | 0  | 0  | 0   |         | 0   | 1   | 2   | 3   | 0.28    |
| 117956395 | Lrba          | lipopolysaccharide-responsive and beige-like anchor protein isoform gamma                                  | 0  | 0  | 1  | 1   | -0.91 # | 0   | 0   | 0   | 0   |         |
| 13277380  | Lias          | lipoyl synthase, mitochondrial precursor                                                                   | 0  | 8  | 6  | 14  | -0.17   | 0   | 0   | 0   | 0   |         |
| 158853994 | Lipt1         | lipoyltransferase 1, mitochondrial precursor                                                               | 0  | 1  | 2  | 3   | -0.41   | 0   | 0   | 0   | 0   |         |
| 6754524   | Ldha          | L-lactate dehydrogenase A chain isoform 1                                                                  | 18 | 25 | 25 | 68  | 0.03    | 9   | 10  | 22  | 41  | 0.00    |
| 274319427 | Lonp2         | lon protease homolog 2, peroxisomal isoform 2                                                              | 1  | 2  | 0  | 3   | 0.84 #  | 0   | 0   | 0   | 0   |         |
| 116089322 | Lonp1         | lon protease homolog, mitochondrial precursor                                                              | 18 | 35 | 26 | 79  | -0.12   | 9   | 44  | 57  | 110 | -0.07   |
| 45597453  | Slc27a4       | long-chain fatty acid transport protein 4                                                                  | 1  | 0  | 0  | 1   | -0.44   | 0   | 0   | 0   | 0   |         |
| 31982520  | Acadl         | long-chain specific acyl-CoA dehydrogenase, mitochondrial precursor                                        | 6  | 3  | 5  | 14  | 0.49    | 1   | 7   | 6   | 14  | -0.31   |
| 209977076 | Acsl3         | long-chain-fatty-acid--CoA ligase 3 isoform b                                                              | 2  | 0  | 0  | 2   | -0.02   | 0   | 0   | 0   | 0   |         |
| 58218988  | Acsl5         | long-chain-fatty-acid--CoA ligase 5                                                                        | 3  | 0  | 0  | 3   | -0.26   | 0   | 0   | 0   | 0   |         |
| 82932679  | LOC631286     | low molecular weight phosphotyrosine protein phosphatase-like                                              | 1  | 2  | 1  | 4   | -0.01   | 0   | 0   | 1   | 1   | -0.13   |
| 309266116 | Srcap         | LOW QUALITY PROTEIN: helicase SRCAP                                                                        | 2  | 5  | 3  | 10  | 0.06    | 0   | 0   | 0   | 0   |         |
| 309265426 | Gm15800       | LOW QUALITY PROTEIN: probable E3 ubiquitin-protein ligase KIAA0614                                         | 0  | 10 | 1  | 11  | 0.25    | 0   | 0   | 0   | 0   |         |
| 309262466 | Rnf213        | LOW QUALITY PROTEIN: RING finger protein 213                                                               | 1  | 2  | 0  | 3   | 0.31    | 0   | 0   | 1   | 1   | 0.08    |
| 58037525  | Lsmd1         | LSM domain-containing protein 1                                                                            | 0  | 1  | 0  | 1   | 0.10    | 0   | 0   | 0   | 0   |         |
| 23956166  | Luc7l3        | luc7-like protein 3                                                                                        | 18 | 39 | 19 | 76  | -0.10 * | 24  | 46  | 60  | 130 | -0.02   |
| 31982246  | D11Wsu47e     | lung cancer-related protein 8                                                                              | 1  | 0  | 0  | 1   | 0.09    | 0   | 0   | 0   | 0   |         |
| 6678143   | Ssb           | lupus La protein homolog                                                                                   | 30 | 38 | 42 | 110 | -0.04   | 192 | 119 | 121 | 432 | -0.01   |
| 12232371  | Hells         | lymphocyte-specific helicase                                                                               | 16 | 18 | 10 | 44  | 0.18    | 32  | 57  | 68  | 157 | 0.11    |
| 41235733  | Lym4          | LYR motif-containing protein 4                                                                             | 1  | 0  | 2  | 3   | -0.23 * | 0   | 0   | 0   | 0   |         |
| 22165366  | Brcc3         | lys-63-specific deubiquitinase BRCC36                                                                      | 1  | 0  | 1  | 2   | 0.01    | 0   | 0   | 0   | 0   |         |
| 21704142  | Krcc1         | lysine-rich coiled-coil protein 1                                                                          | 1  | 0  | 3  | 4   | -0.25   | 0   | 0   | 0   | 0   |         |
| 100818178 | Kdm2a         | lysine-specific demethylase 2A                                                                             | 28 | 22 | 23 | 73  | 0.10 *  | 6   | 47  | 43  | 96  | 0.17    |
| 84662717  | Kdm3a         | lysine-specific demethylase 3A                                                                             | 5  | 8  | 6  | 19  | 0.19    | 0   | 0   | 0   | 0   |         |
| 124486935 | Kdm3b         | lysine-specific demethylase 3B                                                                             | 2  | 1  | 3  | 6   | 0.54 *  | 0   | 0   | 0   | 0   |         |
| 26006857  | Kdm4b         | lysine-specific demethylase 4B                                                                             | 4  | 12 | 5  | 21  | 0.23    | 0   | 3   | 1   | 4   | 0.29    |
| 21450133  | Kdm4c         | lysine-specific demethylase 4C isoform 1                                                                   | 0  | 3  | 1  | 4   | 0.19    | 0   | 0   | 0   | 0   |         |
| 226958545 | Kdm5a         | lysine-specific demethylase 5A                                                                             | 2  | 6  | 6  | 14  | 0.38    | 0   | 0   | 0   | 0   |         |
| 160333703 | Kdm5b         | lysine-specific demethylase 5B                                                                             | 2  | 2  | 2  | 6   | 0.10    | 8   | 23  | 53  | 84  | -0.02   |
| 33859626  | Kdm5d         | lysine-specific demethylase 5D                                                                             | 2  | 0  | 0  | 2   | 0.24    | 0   | 0   | 0   | 0   |         |
| 33859492  | Kdm6a         | lysine-specific demethylase 6A                                                                             | 1  | 18 | 3  | 22  | 0.56    | 0   | 0   | 0   | 0   |         |
| 257743021 | 2410016O06Rik | lysine-specific demethylase NO66                                                                           | 0  | 0  | 0  | 0   |         | 0   | 12  | 0   | 12  | 0.12    |
| 224994233 | Kdm1a         | lysine-specific histone demethylase 1A                                                                     | 59 | 62 | 44 | 165 | 0.16    | 7   | 54  | 24  | 85  | 0.09    |
| 26986559  | Kdm1b         | lysine-specific histone demethylase 1B                                                                     | 0  | 3  | 1  | 4   | 0.05    | 0   | 0   | 0   | 0   |         |
| 227496223 | Lyplal1       | lysophospholipase-like protein 1                                                                           | 1  | 1  | 1  | 3   | -0.25 * | 0   | 1   | 0   | 1   | -1.18 # |
| 23956314  | Mboat1        | lysophospholipid acyltransferase 1                                                                         | 0  | 0  | 0  | 0   |         | 0   | 0   | 2   | 2   | -0.37   |
| 31542014  | Mboat7        | lysophospholipid acyltransferase 7                                                                         | 0  | 0  | 0  | 0   |         | 0   | 2   | 1   | 3   | -0.37   |
| 46402175  | Lpcat4        | lysophospholipid acyltransferase LPCAT4                                                                    | 0  | 0  | 0  | 0   |         | 0   | 0   | 1   | 1   | -0.45 # |
| 226693369 | Gaa           | lysosomal alpha-glucosidase precursor                                                                      | 0  | 0  | 1  | 1   | 0.15    | 0   | 0   | 0   | 0   |         |
| 113195690 | Man2b1        | lysosomal alpha-mannosidase precursor                                                                      | 1  | 0  | 1  | 2   | -0.25   | 0   | 0   | 0   | 0   |         |
| 84042523  | Ctsa          | lysosomal protective protein isoform b                                                                     | 8  | 7  | 4  | 19  | -0.11   | 0   | 0   | 1   | 1   | 0.05    |
| 113195678 | Lamp1         | lysosome-associated membrane glycoprotein 1                                                                | 3  | 0  | 0  | 3   | -0.60 # | 0   | 0   | 0   | 0   |         |
| 7305247   | Lyz1          | lysozyme C-1 precursor                                                                                     | 0  | 0  | 0  | 0   |         | 2   | 0   | 0   | 2   | -5.54 # |

|           |          |                                                                        |     |     |     |     |          |     |     |     |      |         |
|-----------|----------|------------------------------------------------------------------------|-----|-----|-----|-----|----------|-----|-----|-----|------|---------|
| 170650601 | Macrocl1 | MACRO domain-containing protein 1                                      | 9   | 9   | 10  | 28  | -0.14    | 0   | 3   | 1   | 4    | -0.13   |
| 6754696   | Mif      | macrophage migration inhibitory factor                                 | 0   | 3   | 1   | 4   | 0.18     | 0   | 1   | 0   | 1    | -0.23   |
| 110227377 | Capg     | macrophage-capping protein isoform 2                                   | 4   | 5   | 7   | 16  | -0.05    | 3   | 21  | 38  | 62   | -0.10   |
| 254826797 | Mad2l1bp | MAD2L1-binding protein                                                 | 8   | 12  | 8   | 28  | 0.00     | 0   | 4   | 4   | 8    | 0.06    |
| 298676496 | Magt1    | magnesium transporter protein 1 precursor                              | 3   | 5   | 4   | 12  | -0.23 *  | 1   | 2   | 2   | 5    | -0.29   |
| 12963663  | Mdp1     | magnesium-dependent phosphatase 1                                      | 0   | 0   | 4   | 4   | -0.22    | 0   | 0   | 0   | 0    |         |
| 257900520 | Mpp6     | MAGUK p55 subfamily member 6 isoform b                                 | 2   | 1   | 1   | 4   | 0.41 *   | 0   | 0   | 0   | 0    |         |
| 239051572 | Mpp7     | MAGUK p55 subfamily member 7 isoform 1                                 | 18  | 35  | 5   | 58  | 0.06     | 0   | 5   | 0   | 5    | 0.23    |
| 239051602 | Mpp7     | MAGUK p55 subfamily member 7 isoform 2                                 | 0   | 2   | 1   | 3   | -0.45    | 0   | 0   | 2   | 2    | -0.05   |
| 34328105  | Cenpb    | major centromere autoantigen B                                         | 0   | 0   | 0   | 0   |          | 0   | 3   | 4   | 7    | 0.24    |
| 13386144  | Mfsd10   | major facilitator superfamily domain-containing protein 10             | 4   | 3   | 3   | 10  | -0.32 *  | 10  | 4   | 7   | 21   | -0.26   |
| 239052674 | Mvp      | major vault protein                                                    | 0   | 0   | 0   | 0   |          | 0   | 0   | 1   | 1    | -0.12   |
| 254540027 | Mdh1     | malate dehydrogenase, cytoplasmic                                      | 6   | 3   | 4   | 13  | 0.19     | 0   | 1   | 3   | 4    | 0.19    |
| 31982186  | Mdh2     | malate dehydrogenase, mitochondrial precursor                          | 65  | 67  | 65  | 197 | -0.15 *  | 89  | 37  | 54  | 180  | -0.03   |
| 188497650 | Mlec     | malectin precursor                                                     | 15  | 18  | 14  | 47  | -0.24 *  | 25  | 11  | 16  | 52   | -0.14   |
| 166091474 | Msl1     | male-specific lethal 1 homolog                                         | 1   | 1   | 2   | 4   | -0.14    | 0   | 0   | 0   | 0    |         |
| 11545735  | Msl3     | male-specific lethal 3 homolog                                         | 0   | 1   | 1   | 2   | -0.40 *  | 0   | 0   | 0   | 0    |         |
| 6754092   | Gstz1    | maleylacetoacetate isomerase                                           | 6   | 0   | 1   | 7   | -0.11    | 0   | 0   | 1   | 1    | 0.20    |
| 21312175  | Mcts1    | malignant T cell-amplified sequence 1                                  | 9   | 16  | 11  | 36  | -0.09    | 0   | 0   | 0   | 0    |         |
| 13384966  | Mcts2    | malignant T cell-amplified sequence 2                                  | 12  | 11  | 15  | 38  | -0.09    | 0   | 2   | 2   | 4    | 0.30    |
| 71725343  | Mcat     | malonyl-CoA-acyl carrier protein transacylase, mitochondrial precursor | 4   | 3   | 6   | 13  | -0.09    | 0   | 0   | 0   | 0    |         |
| 282165729 | Epdr1    | mammalian ependymin-related protein 1 precursor                        | 0   | 4   | 3   | 7   | -0.29    | 0   | 0   | 0   | 0    |         |
| 255958162 | Fam89b   | mammary tumor virus receptor 2 isoform 2                               | 1   | 0   | 0   | 1   | 0.37     | 0   | 0   | 0   | 0    |         |
| 31981340  | Mpdu1    | mannose-P-dolichol utilization defect 1 protein                        | 4   | 0   | 2   | 6   | -0.39    | 5   | 0   | 1   | 6    | -0.57 # |
| 6754620   | Man1a2   | mannosyl-oligosaccharide 1,2-alpha-mannosidase IB                      | 0   | 0   | 0   | 0   |          | 0   | 0   | 1   | 1    | 0.07    |
| 31981106  | Mogs     | mannosyl-oligosaccharide glucosidase                                   | 4   | 3   | 3   | 10  | -0.42 *  | 11  | 2   | 3   | 16   | -0.29 * |
| 251823812 | Mark3    | MAP/microtubule affinity-regulating kinase 3 isoform 2                 | 1   | 0   | 3   | 4   | -1.99 #  | 0   | 0   | 0   | 0    |         |
| 21703882  | Mbip     | MAP3K12-binding inhibitory protein 1                                   | 2   | 6   | 2   | 10  | 0.30     | 0   | 0   | 0   | 0    |         |
| 6754706   | Marcks1  | MARCKS-related protein                                                 | 5   | 4   | 6   | 15  | -0.24    | 0   | 1   | 1   | 2    | 0.09    |
| 25141233  | Matr3    | matrin-3                                                               | 124 | 144 | 143 | 411 | -0.08    | 342 | 403 | 435 | 1180 | -0.08   |
| 188528637 | Mmp14    | matrix metalloproteinase-14                                            | 1   | 0   | 0   | 1   | 0.41     | 0   | 0   | 0   | 0    |         |
| 269308211 | Mau2     | MAU2 chromatid cohesion factor homolog isoform 2                       | 2   | 2   | 1   | 5   | 0.50 *   | 0   | 5   | 1   | 6    | 0.34    |
| 158508479 | Mbtd1    | MBT domain-containing protein 1                                        | 1   | 0   | 1   | 2   | 0.20     | 0   | 0   | 0   | 0    |         |
| 10946816  | Mecom    | MDS1 and EVI1 complex locus protein EVI1 isoform 2                     | 1   | 2   | 1   | 4   | 0.03     | 0   | 0   | 5   | 5    | 0.04    |
| 132626693 | Mdc1     | mediator of DNA damage checkpoint protein 1                            | 119 | 135 | 90  | 344 | 0.20 *   | 47  | 37  | 55  | 139  | -0.05   |
| 121582430 | Med1     | mediator of RNA polymerase II transcription subunit 1 isoform 1        | 7   | 19  | 8   | 34  | 0.61 *,# | 0   | 0   | 0   | 0    |         |
| 20070410  | Med10    | mediator of RNA polymerase II transcription subunit 10                 | 8   | 5   | 2   | 15  | 0.38     | 0   | 2   | 0   | 2    | 0.31    |
| 27754138  | Med11    | mediator of RNA polymerase II transcription subunit 11                 | 4   | 3   | 7   | 14  | 0.42     | 0   | 0   | 0   | 0    |         |
| 125628662 | Med12    | mediator of RNA polymerase II transcription subunit 12                 | 19  | 38  | 21  | 78  | 0.47 *   | 0   | 2   | 0   | 2    | 0.35    |
| 242397421 | Med12l   | mediator of RNA polymerase II transcription subunit 12-like protein    | 1   | 0   | 0   | 1   | 0.48     | 0   | 0   | 0   | 0    |         |

|           |        |                                                                                        |    |    |    |    |       |     |   |    |    |    |          |
|-----------|--------|----------------------------------------------------------------------------------------|----|----|----|----|-------|-----|---|----|----|----|----------|
| 124286862 | Med13  | mediator of RNA polymerase II transcription subunit 13                                 | 6  | 21 | 11 | 38 | 0.63  | *,# | 0 | 0  | 0  | 0  |          |
| 146134449 | Med13l | mediator of RNA polymerase II transcription subunit 13-like                            | 0  | 2  | 0  | 2  | 0.51  |     | 0 | 0  | 0  | 0  |          |
| 115270977 | Med14  | mediator of RNA polymerase II transcription subunit 14 isoform a                       | 0  | 0  | 20 | 20 | 0.74  | #   | 0 | 0  | 0  | 0  |          |
| 115270972 | Med14  | mediator of RNA polymerase II transcription subunit 14 isoform b                       | 25 | 37 | 0  | 62 | 0.49  |     | 0 | 0  | 0  | 0  |          |
| 100817039 | Med15  | mediator of RNA polymerase II transcription subunit 15 isoform b                       | 0  | 0  | 2  | 2  | 0.44  |     | 0 | 0  | 0  | 0  |          |
| 253970419 | Med16  | mediator of RNA polymerase II transcription subunit 16 isoform 2                       | 5  | 11 | 4  | 20 | 0.29  | *   | 0 | 0  | 0  | 0  |          |
| 21450345  | Med17  | mediator of RNA polymerase II transcription subunit 17                                 | 8  | 7  | 10 | 25 | 0.38  |     | 0 | 0  | 1  | 1  | 0.55 #   |
| 21313064  | Med18  | mediator of RNA polymerase II transcription subunit 18                                 | 0  | 2  | 0  | 2  | 0.32  |     | 0 | 0  | 0  | 0  |          |
| 21313194  | Med19  | mediator of RNA polymerase II transcription subunit 19                                 | 4  | 6  | 2  | 12 | 0.42  |     | 0 | 1  | 0  | 1  | -0.41    |
| 9910590   | Med20  | mediator of RNA polymerase II transcription subunit 20                                 | 6  | 10 | 3  | 19 | 0.39  |     | 0 | 5  | 2  | 7  | 0.44     |
| 13384678  | Med21  | mediator of RNA polymerase II transcription subunit 21                                 | 7  | 11 | 5  | 23 | 0.48  | *   | 0 | 0  | 0  | 0  |          |
| 6755700   | Med22  | mediator of RNA polymerase II transcription subunit 22 isoform 1                       | 10 | 10 | 6  | 26 | 0.54  |     | 0 | 0  | 0  | 0  |          |
| 261878547 | Med23  | mediator of RNA polymerase II transcription subunit 23 isoform 2                       | 26 | 33 | 28 | 87 | 0.46  | *   | 0 | 22 | 2  | 24 | 0.34     |
| 119220579 | Med24  | mediator of RNA polymerase II transcription subunit 24                                 | 8  | 17 | 8  | 33 | 0.28  |     | 0 | 4  | 1  | 5  | 0.28     |
| 20149312  | Med25  | mediator of RNA polymerase II transcription subunit 25                                 | 0  | 4  | 1  | 5  | 0.58  | #   | 0 | 0  | 0  | 0  |          |
| 76253678  | Med27  | mediator of RNA polymerase II transcription subunit 27                                 | 9  | 11 | 12 | 32 | 0.43  |     | 0 | 2  | 3  | 5  | 0.38     |
| 13385388  | Med28  | mediator of RNA polymerase II transcription subunit 28                                 | 3  | 9  | 3  | 15 | 0.52  |     | 0 | 0  | 0  | 0  |          |
| 27754101  | Med29  | mediator of RNA polymerase II transcription subunit 29                                 | 2  | 6  | 6  | 14 | 0.48  | *   | 0 | 0  | 0  | 0  |          |
| 19882231  | Med30  | mediator of RNA polymerase II transcription subunit 30                                 | 5  | 9  | 6  | 20 | 0.39  |     | 0 | 3  | 1  | 4  | 0.38     |
| 56119162  | Med31  | mediator of RNA polymerase II transcription subunit 31                                 | 5  | 4  | 4  | 13 | 0.39  |     | 0 | 0  | 0  | 0  |          |
| 13385626  | Med4   | mediator of RNA polymerase II transcription subunit 4                                  | 13 | 16 | 13 | 42 | 0.44  |     | 0 | 2  | 2  | 4  | 0.41     |
| 27754027  | Med6   | mediator of RNA polymerase II transcription subunit 6                                  | 2  | 4  | 5  | 11 | 0.42  |     | 0 | 1  | 2  | 3  | 0.65 #   |
| 157266302 | Med7   | mediator of RNA polymerase II transcription subunit 7                                  | 5  | 6  | 5  | 16 | 0.64  | *,# | 0 | 0  | 0  | 0  |          |
| 114155155 | Med8   | mediator of RNA polymerase II transcription subunit 8 isoform 1                        | 0  | 11 | 0  | 11 | 0.35  |     | 0 | 0  | 0  | 0  |          |
| 29366816  | Med8   | mediator of RNA polymerase II transcription subunit 8 isoform 2                        | 5  | 0  | 5  | 10 | 0.58  | #   | 0 | 0  | 2  | 2  | -10.24 # |
| 31981674  | Med9   | mediator of RNA polymerase II transcription subunit 9                                  | 0  | 1  | 0  | 1  | 0.39  |     | 0 | 0  | 0  | 0  |          |
| 6680618   | Acadm  | medium-chain specific acyl-CoA dehydrogenase, mitochondrial precursor                  | 10 | 10 | 11 | 31 | -0.12 |     | 0 | 8  | 8  | 16 | -0.02    |
| 240848585 | Mnd1   | meiotic nuclear division protein 1 homolog                                             | 1  | 0  | 0  | 1  | 0.51  |     | 0 | 0  | 0  | 0  |          |
| 12963595  | Ndn12  | melanoma-associated antigen G1                                                         | 5  | 6  | 7  | 18 | 0.24  |     | 5 | 7  | 10 | 22 | -0.17 *  |
| 22122803  | Mmgt1  | membrane magnesium transporter 1 precursor                                             | 1  | 0  | 0  | 1  | -0.02 |     | 0 | 0  | 0  | 0  |          |
| 134031962 | Magi1  | membrane-associated guanylate kinase, WW and PDZ domain-containing protein 1 isoform d | 0  | 1  | 0  | 1  | 1.16  | #   | 0 | 0  | 0  | 0  |          |

|           |          |                                                                                        |    |    |    |    |         |    |    |    |    |          |  |
|-----------|----------|----------------------------------------------------------------------------------------|----|----|----|----|---------|----|----|----|----|----------|--|
| 226823238 | Magi3    | membrane-associated guanylate kinase, WW and PDZ domain-containing protein 3 isoform 1 | 0  | 2  | 0  | 2  | 0.73 #  | 0  | 0  | 0  | 0  |          |  |
| 19527074  | Magi3    | membrane-associated guanylate kinase, WW and PDZ domain-containing protein 3 isoform 2 | 1  | 0  | 0  | 1  | 1.11 #  | 0  | 0  | 0  | 0  |          |  |
| 31980806  | Pgrmc1   | membrane-associated progesterone receptor component 1                                  | 9  | 5  | 4  | 18 | -0.22   | 19 | 2  | 5  | 26 | -0.20    |  |
| 226442772 | Pgrmc2   | membrane-associated progesterone receptor component 2                                  | 12 | 6  | 7  | 25 | -0.31 * | 10 | 2  | 1  | 13 | -0.28 *  |  |
| 6678858   | Men1     | menin isoform b                                                                        | 16 | 15 | 11 | 42 | -0.10 * | 0  | 13 | 10 | 23 | -0.18    |  |
| 270309153 | Men1     | menin isoform c                                                                        | 0  | 0  | 0  | 0  |         | 1  | 0  | 5  | 6  | -0.22    |  |
| 110625813 | Manf     | mesencephalic astrocyte-derived neurotrophic factor precursor                          | 26 | 42 | 26 | 94 | 0.00    | 1  | 15 | 7  | 23 | 1.55 #   |  |
| 7305285   | Mt1      | metallothionein-1                                                                      | 6  | 6  | 5  | 17 | 0.05    | 0  | 0  | 0  | 0  |          |  |
| 33468863  | Mt2      | metallothionein-2                                                                      | 4  | 6  | 5  | 15 | 0.14    | 0  | 0  | 0  | 0  |          |  |
| 6678942   | Mt4      | metallothionein-4                                                                      | 0  | 0  | 0  | 0  |         | 1  | 0  | 0  | 1  | -10.02 # |  |
| 70887769  | Mtf2     | metal-response element-binding transcription factor 2                                  | 0  | 0  | 1  | 1  | -0.49   | 0  | 1  | 1  | 2  | 0.67 #   |  |
| 91598896  | Mta1     | metastasis-associated protein MTA1                                                     | 10 | 11 | 23 | 44 | 0.59 #  | 29 | 38 | 29 | 96 | 0.34 *   |  |
| 51491880  | Mta2     | metastasis-associated protein MTA2                                                     | 17 | 30 | 23 | 70 | 0.38    | 29 | 35 | 21 | 85 | 0.18     |  |
| 283806536 | Mta3     | metastasis-associated protein MTA3 isoform 1                                           | 0  | 15 | 0  | 15 | 0.23    | 0  | 27 | 0  | 27 | 0.30     |  |
| 283806541 | Mta3     | metastasis-associated protein MTA3 isoform 4                                           | 8  | 8  | 11 | 27 | 0.30    | 9  | 0  | 15 | 24 | 0.27     |  |
| 241982742 | Mtx1     | metaxin-1 isoform 2                                                                    | 4  | 1  | 4  | 9  | 0.30    | 0  | 2  | 3  | 5  | 0.49 #   |  |
| 228480241 | Mtx2     | metaxin-2                                                                              | 2  | 2  | 0  | 4  | 0.15    | 2  | 9  | 5  | 16 | 0.42     |  |
| 28202007  | Metap1   | methionine aminopeptidase 1                                                            | 26 | 38 | 23 | 87 | -0.02   | 12 | 19 | 24 | 55 | 0.02     |  |
| 9789873   | Metap2   | methionine aminopeptidase 2                                                            | 1  | 2  | 2  | 5  | 0.21    | 0  | 0  | 1  | 1  | 0.01     |  |
| 227499995 | Mtfmt    | methionyl-tRNA formyltransferase, mitochondrial precursor                              | 0  | 0  | 0  | 0  |         | 1  | 0  | 0  | 1  | 5.39 #   |  |
| 51491852  | Mars     | methionyl-tRNA synthetase, cytoplasmic isoform 2                                       | 0  | 0  | 0  | 0  |         | 0  | 0  | 4  | 4  | 0.22     |  |
| 157817372 | Mbd1     | methyl-CpG-binding domain protein 1                                                    | 1  | 0  | 0  | 1  | 0.31    | 12 | 13 | 6  | 31 | -0.04 *  |  |
| 218931229 | Mbd2     | methyl-CpG-binding domain protein 2                                                    | 12 | 11 | 9  | 32 | 0.10    | 3  | 13 | 5  | 21 | 0.09     |  |
| 7305261   | Mbd3     | methyl-CpG-binding domain protein 3                                                    | 24 | 24 | 23 | 71 | 0.47 *  | 19 | 22 | 18 | 59 | 0.44 *   |  |
| 14149645  | Mecp2    | methyl-CpG-binding protein 2 isoform 2                                                 | 6  | 15 | 10 | 31 | -0.03   | 12 | 26 | 30 | 68 | 0.01     |  |
| 186700620 | Mccc1    | methylcrotonoyl-CoA carboxylase subunit alpha, mitochondrial                           | 1  | 0  | 0  | 1  | 0.86 #  | 0  | 0  | 0  | 0  |          |  |
| 124301198 | Mthfd2l  | methylenetetrahydrofolate dehydrogenase 2-like                                         | 1  | 9  | 11 | 21 | 0.12    | 0  | 0  | 0  | 0  |          |  |
| 116268115 | Auh      | methylglutaconyl-CoA hydratase, mitochondrial precursor                                | 4  | 4  | 2  | 10 | -0.06   | 0  | 0  | 0  | 0  |          |  |
| 19527258  | Aldh6a1  | methylmalonate-semialdehyde dehydrogenase [acylating], mitochondrial precursor         | 3  | 0  | 0  | 3  | -0.24   | 0  | 0  | 0  | 0  |          |  |
| 58037329  | Mcee     | methylmalonyl-CoA epimerase, mitochondrial precursor                                   | 1  | 2  | 0  | 3  | -0.26   | 0  | 0  | 0  | 0  |          |  |
| 61098178  | Mettl7a2 | methyltransferase like 7A2                                                             | 0  | 3  | 0  | 3  | 0.68 #  | 0  | 0  | 1  | 1  | 0.48 #   |  |
| 260099682 | Mettl14  | methyltransferase-like protein 14                                                      | 2  | 1  | 0  | 3  | 0.97 #  | 0  | 0  | 0  | 0  |          |  |
| 33563290  | Mettl7a1 | methyltransferase-like protein 7A                                                      | 5  | 0  | 2  | 7  | -1.16 # | 0  | 0  | 0  | 0  |          |  |
| 219521935 | H2-Gs10  | MHC class I like protein GS10                                                          | 1  | 0  | 0  | 1  | -1.22 # | 0  | 0  | 0  | 0  |          |  |
| 239916007 | Rfx1     | MHC class II regulatory factor RFX1                                                    | 0  | 2  | 0  | 2  | 0.31    | 0  | 0  | 0  | 0  |          |  |
| 254553310 | Micall2  | MICAL-like 2                                                                           | 0  | 1  | 0  | 1  | 0.72 #  | 0  | 0  | 0  | 0  |          |  |
| 126517472 | Mfap1b   | microfibrillar-associated protein 1B                                                   | 1  | 11 | 3  | 15 | 0.02    | 4  | 15 | 9  | 28 | 0.07     |  |
| 41152099  | Dgcr8    | microprocessor complex subunit DGCR8                                                   | 1  | 0  | 1  | 2  | 0.51    | 0  | 0  | 0  | 0  |          |  |
| 31981068  | Mgst1    | microsomal glutathione S-transferase 1                                                 | 2  | 4  | 3  | 9  | -0.10   | 1  | 0  | 2  | 3  | 0.02     |  |
| 13385010  | Mgst3    | microsomal glutathione S-transferase 3                                                 | 7  | 4  | 5  | 16 | 0.24 *  | 12 | 2  | 2  | 16 | 0.33     |  |
| 255918178 | Mcrs1    | microspherule protein 1 isoform 2                                                      | 6  | 0  | 4  | 10 | 0.31    | 0  | 0  | 0  | 0  |          |  |

|           |              |                                                                         |     |     |    |     |        |    |    |    |     |        |  |
|-----------|--------------|-------------------------------------------------------------------------|-----|-----|----|-----|--------|----|----|----|-----|--------|--|
| 309265166 | LOC100505102 | microspherule protein 1-like                                            | 0   | 6   | 0  | 6   | 0.04   | 0  | 0  | 0  | 0   |        |  |
| 312433957 | Macf1        | microtubule-actin cross-linking factor 1 isoform 2                      | 1   | 41  | 9  | 51  | 0.06   | 0  | 0  | 0  | 0   |        |  |
| 171543853 | Mtap1b       | microtubule-associated protein 1B                                       | 0   | 7   | 2  | 9   | 0.28   | 0  | 0  | 0  | 0   |        |  |
| 162287131 | Mtap1s       | microtubule-associated protein 1S                                       | 0   | 6   | 1  | 7   | -1.62# | 0  | 0  | 0  | 0   |        |  |
| 90186270  | Mtap2        | microtubule-associated protein 2 isoform 1                              | 0   | 0   | 1  | 1   | -1.75# | 0  | 0  | 0  | 0   |        |  |
| 148747189 | Mtap4        | microtubule-associated protein 4 isoform 2                              | 17  | 11  | 4  | 32  | 0.16   | 0  | 0  | 0  | 0   |        |  |
| 114520594 | Mtap6        | microtubule-associated protein 6 isoform 3                              | 0   | 1   | 1  | 2   | 0.02   | 0  | 0  | 0  | 0   |        |  |
| 7106301   | Mapre1       | microtubule-associated protein RP/EB family member 1                    | 8   | 12  | 8  | 28  | 0.11   | 0  | 1  | 1  | 2   | 0.30   |  |
| 13385664  | Map1lc3b     | microtubule-associated proteins 1A/1B light chain 3B                    | 1   | 1   | 0  | 2   | 0.28   | 0  | 0  | 0  | 0   |        |  |
| 124487133 | Mdn1         | midasin                                                                 | 131 | 137 | 72 | 340 | 0.29   | 0  | 7  | 22 | 29  | 0.48#  |  |
| 188035926 | Ndufaf2      | mimitin, mitochondrial precursor                                        | 1   | 0   | 0  | 1   | -0.23  | 0  | 0  | 0  | 0   |        |  |
| 31044421  | Mis18bp1     | mis18-binding protein 1                                                 | 0   | 0   | 0  | 0   |        | 0  | 0  | 2  | 2   | -0.30  |  |
| 110625710 | Mitd1        | MIT domain-containing protein 1                                         | 4   | 2   | 0  | 6   | 0.30   | 0  | 0  | 0  | 0   |        |  |
| 21312994  | Slc25a11     | mitochondrial 2-oxoglutarate/malate carrier protein                     | 12  | 14  | 11 | 37  | 0.06   | 30 | 21 | 13 | 64  | -0.01  |  |
| 10048462  | Slc25a20     | mitochondrial carnitine/acylcarnitine carrier protein                   | 0   | 0   | 0  | 0   |        | 1  | 0  | 3  | 4   | 0.00   |  |
| 9790055   | Mtch2        | mitochondrial carrier homolog 2                                         | 1   | 2   | 1  | 4   | 0.32   | 10 | 5  | 13 | 28  | 0.22   |  |
| 254826790 | Slc25a10     | mitochondrial dicarboxylate carrier                                     | 10  | 4   | 11 | 25  | -0.10  | 33 | 10 | 11 | 54  | 0.00   |  |
| 253735731 | Fis1         | mitochondrial fission 1 protein isoform 2                               | 7   | 7   | 7  | 21  | -0.17  | 1  | 0  | 0  | 1   | -2.46# |  |
| 188528646 | Mtg1         | mitochondrial GTPase 1 precursor                                        | 4   | 5   | 7  | 16  | -0.19  | 0  | 0  | 0  | 0   |        |  |
| 158937240 | Timm10       | mitochondrial import inner membrane translocase subunit Tim10           | 3   | 0   | 0  | 3   | -1.52# | 1  | 0  | 0  | 1   | 0.00   |  |
| 7305581   | Timm13       | mitochondrial import inner membrane translocase subunit Tim13           | 17  | 24  | 15 | 56  | -0.10  | 14 | 5  | 9  | 28  | 0.06   |  |
| 309268906 | LOC100503724 | mitochondrial import inner membrane translocase subunit TIM14-like      | 2   | 1   | 1  | 4   | 0.00   | 0  | 0  | 0  | 0   |        |  |
| 309262139 | Gm9803       | mitochondrial import inner membrane translocase subunit Tim16-like      | 8   | 3   | 6  | 17  | -0.14* | 0  | 0  | 1  | 1   | -0.38  |  |
| 33468937  | Timm17b      | mitochondrial import inner membrane translocase subunit Tim17-B         | 2   | 0   | 0  | 2   | -0.11  | 0  | 0  | 0  | 0   |        |  |
| 254675168 | Timm23       | mitochondrial import inner membrane translocase subunit Tim23           | 0   | 0   | 0  | 0   |        | 3  | 0  | 2  | 5   | -0.08  |  |
| 170763467 | Timm44       | mitochondrial import inner membrane translocase subunit TIM44 precursor | 13  | 1   | 7  | 21  | -0.28  | 2  | 4  | 8  | 14  | -0.04  |  |
| 22094989  | Timm50       | mitochondrial import inner membrane translocase subunit TIM50 precursor | 2   | 0   | 0  | 2   | -0.24  | 5  | 6  | 7  | 18  | -0.31  |  |
| 7305577   | Timm8a1      | mitochondrial import inner membrane translocase subunit Tim8 A          | 12  | 5   | 10 | 27  | -0.03  | 3  | 2  | 2  | 7   | -0.10  |  |
| 7305579   | Timm8b       | mitochondrial import inner membrane translocase subunit Tim8 B          | 6   | 10  | 8  | 24  | 0.01   | 7  | 3  | 5  | 15  | 0.09*  |  |
| 67846109  | Timm9        | mitochondrial import inner membrane translocase subunit Tim9            | 2   | 1   | 0  | 3   | 0.02   | 1  | 0  | 0  | 1   | -0.16  |  |
| 31982091  | Tomm22       | mitochondrial import receptor subunit TOM22 homolog                     | 3   | 1   | 4  | 8   | 0.15   | 10 | 4  | 6  | 20  | 0.08   |  |
| 13385500  | Tomm34       | mitochondrial import receptor subunit TOM34                             | 15  | 17  | 20 | 52  | 0.08   | 0  | 0  | 2  | 2   | 0.07   |  |
| 157909797 | Tomm40       | mitochondrial import receptor subunit TOM40 homolog                     | 0   | 0   | 0  | 0   |        | 6  | 2  | 5  | 13  | 0.33   |  |
| 309265294 | Gm8069       | mitochondrial import receptor subunit TOM5 homolog                      | 0   | 0   | 0  | 0   |        | 1  | 0  | 0  | 1   | 0.52#  |  |
| 27552760  | Tomm70a      | mitochondrial import receptor subunit TOM70                             | 6   | 11  | 17 | 34  | 0.12   | 1  | 1  | 1  | 3   | 0.12   |  |
| 70608131  | Immt         | mitochondrial inner membrane protein                                    | 0   | 0   | 0  | 0   |        | 57 | 25 | 29 | 111 | 0.51*# |  |

|           |               |                                                                      |    |    |    |     |          |    |    |    |     |         |  |
|-----------|---------------|----------------------------------------------------------------------|----|----|----|-----|----------|----|----|----|-----|---------|--|
| 19527144  | Chchd4        | mitochondrial intermembrane space import and assembly protein 40     | 1  | 1  | 1  | 3   | -0.29    | 0  | 0  | 0  | 0   |         |  |
| 227908787 | 1110008L16Rik | mitochondrial ribonuclease P protein 3 precursor                     | 0  | 0  | 1  | 1   | 0.02     | 0  | 0  | 0  | 0   |         |  |
| 27502349  | Pmpca         | mitochondrial-processing peptidase subunit alpha precursor           | 3  | 0  | 1  | 4   | -0.21    | 0  | 0  | 0  | 0   |         |  |
| 95113671  | Pmpcb         | mitochondrial-processing peptidase subunit beta precursor            | 5  | 1  | 3  | 9   | -0.21 *  | 0  | 0  | 0  | 0   |         |  |
| 6754632   | Mapk1         | mitogen-activated protein kinase 1                                   | 11 | 16 | 9  | 36  | -0.08    | 1  | 8  | 22 | 31  | -0.09   |  |
| 226246627 | Mapk13        | mitogen-activated protein kinase 13                                  | 3  | 10 | 4  | 17  | 0.35 *   | 0  | 0  | 0  | 0   |         |  |
| 21489933  | Mapk3         | mitogen-activated protein kinase 3                                   | 0  | 0  | 0  | 0   |          | 0  | 2  | 0  | 2   | 0.19    |  |
| 77736537  | Map4k5        | mitogen-activated protein kinase kinase kinase 5                     | 0  | 3  | 2  | 5   | 0.14     | 0  | 0  | 1  | 1   | -0.31   |  |
| 31560618  | Bub3          | mitotic checkpoint protein BUB3                                      | 35 | 47 | 25 | 107 | 0.23 *   | 7  | 22 | 18 | 47  | 0.10    |  |
| 88014564  | Mad1l1        | mitotic spindle assembly checkpoint protein MAD1                     | 28 | 32 | 18 | 78  | -0.06    | 3  | 5  | 4  | 12  | 0.86 #  |  |
| 31543218  | Mad2l1        | mitotic spindle assembly checkpoint protein MAD2A                    | 11 | 11 | 7  | 29  | -0.01    | 0  | 7  | 0  | 7   | -0.33   |  |
| 149262068 | LOC100045924  | mitotic spindle assembly checkpoint protein MAD2A-like               | 0  | 0  | 0  | 0   |          | 2  | 0  | 3  | 5   | -0.10   |  |
| 30424884  | Mzt1          | mitotic-spindle organizing protein 1                                 | 1  | 2  | 2  | 5   | -0.20    | 0  | 0  | 2  | 2   | -0.15   |  |
| 21312988  | Mzt2          | mitotic-spindle organizing protein 2                                 | 2  | 1  | 1  | 4   | 0.15     | 0  | 0  | 0  | 0   |         |  |
| 224809384 | Mki67ip       | MKI67 FHA domain-interacting nucleolar phosphoprotein                | 1  | 1  | 0  | 2   | 0.04     | 16 | 31 | 28 | 75  | 0.15    |  |
| 76559944  | 1500001M20Rik | MMP37-like protein, mitochondrial precursor                          | 0  | 2  | 0  | 2   | -0.27    | 0  | 0  | 2  | 2   | -0.85 # |  |
| 70778915  | Msn           | moesin                                                               | 19 | 27 | 40 | 86  | 0.11     | 0  | 4  | 8  | 12  | -0.23   |  |
| 161484622 | Mocs1         | molybdenum cofactor biosynthesis protein 1 isoform 2                 | 0  | 0  | 1  | 1   | 0.01     | 0  | 0  | 0  | 0   |         |  |
| 159110817 | Abhd12        | monoacylglycerol lipase ABHD12                                       | 1  | 0  | 1  | 2   | -0.25    | 1  | 0  | 0  | 1   | 0.11    |  |
| 31560264  | Abhd6         | monoacylglycerol lipase ABHD6                                        | 18 | 10 | 17 | 45  | -0.24    | 0  | 4  | 6  | 10  | -0.23   |  |
| 6677995   | Slc16a1       | monocarboxylate transporter 1                                        | 0  | 0  | 1  | 1   | -0.12    | 0  | 0  | 4  | 4   | -0.02   |  |
| 283135110 | Mthfd1l       | monofunctional C1-tetrahydrofolate synthase, mitochondrial precursor | 41 | 35 | 43 | 119 | -0.14    | 4  | 22 | 47 | 73  | -0.22   |  |
| 37718976  | Morc2a        | MORC family CW-type zinc finger protein 2A isoform 2                 | 5  | 8  | 3  | 16  | 0.26 *   | 0  | 0  | 0  | 0   |         |  |
| 13385746  | Mrfap1        | MORF4 family-associated protein 1                                    | 8  | 4  | 3  | 15  | -0.36    | 0  | 0  | 0  | 0   |         |  |
| 269996027 | Morf4l2       | mortality factor 4-like protein 2                                    | 0  | 6  | 0  | 6   | 0.34     | 0  | 0  | 0  | 0   |         |  |
| 19526848  | Mosc2         | MOSC domain-containing protein 2, mitochondrial precursor            | 6  | 6  | 8  | 20  | -0.05    | 4  | 12 | 13 | 29  | 0.16 *  |  |
| 31543224  | Smad4         | mothers against decapentaplegic homolog 4                            | 0  | 4  | 0  | 4   | 0.44     | 0  | 0  | 0  | 0   |         |  |
| 254675302 | Mospd4        | motile sperm domain containing 4                                     | 1  | 0  | 0  | 1   | -10.10 # | 0  | 0  | 0  | 0   |         |  |
| 21312048  | Mphosph6      | M-phase phosphoprotein 6                                             | 10 | 8  | 6  | 24  | 0.02     | 0  | 1  | 0  | 1   | -0.02   |  |
| 225543402 | Mphosph8      | M-phase phosphoprotein, mpp8                                         | 0  | 0  | 0  | 0   |          | 0  | 4  | 1  | 5   | 0.09    |  |
| 146134497 | Mpnd          | MPN domain-containing protein                                        | 0  | 0  | 0  | 0   |          | 0  | 6  | 1  | 7   | -0.21   |  |
| 21704148  | Mobk1b        | mps one binder kinase activator-like 1B                              | 0  | 1  | 0  | 1   | 0.41     | 0  | 0  | 0  | 0   |         |  |
| 40254521  | Mobk3         | mps one binder kinase activator-like 3                               | 3  | 4  | 3  | 10  | 0.91 *,# | 0  | 0  | 1  | 1   | 0.25    |  |
| 110625965 | 1600027N09Rik | MRG-binding protein                                                  | 6  | 6  | 7  | 19  | 0.23 *   | 0  | 1  | 3  | 4   | 0.25    |  |
| 13385938  | Rnmt          | mRNA cap guanine-N7 methyltransferase isoform 1                      | 0  | 1  | 0  | 1   | -0.44    | 0  | 0  | 0  | 0   |         |  |
| 28201956  | Rae1          | mRNA export factor                                                   | 25 | 46 | 28 | 99  | -0.08    | 18 | 53 | 49 | 120 | 0.03    |  |
| 37537520  | Mrto4         | mRNA turnover protein 4 homolog                                      | 9  | 11 | 6  | 26  | -0.04    | 18 | 10 | 9  | 37  | -0.04   |  |
| 149262895 | Gm5633        | mRNA turnover protein 4 homolog isoform 2                            | 5  | 0  | 5  | 10  | -0.02    | 0  | 6  | 7  | 13  | 0.07    |  |
| 120587001 | Spen          | msx2-interacting protein                                             | 0  | 4  | 0  | 4   | 0.90 #   | 0  | 0  | 0  | 0   |         |  |
| 7305293   | Muc1          | mucin-1                                                              | 0  | 3  | 0  | 3   | 0.64 #   | 0  | 3  | 0  | 3   | 0.94 #  |  |
| 167736365 | Muc4          | mucin-4                                                              | 1  | 0  | 1  | 2   | 0.88 #   | 0  | 0  | 0  | 0   |         |  |
| 6755046   | Abcb1b        | multidrug resistance protein 1                                       | 0  | 0  | 0  | 0   |          | 0  | 1  | 1  | 2   | -0.56 # |  |



|           |               |                                                                       |     |     |     |      |         |  |     |     |     |      |          |
|-----------|---------------|-----------------------------------------------------------------------|-----|-----|-----|------|---------|--|-----|-----|-----|------|----------|
| 13385434  | Paics         | multifunctional protein ADE2                                          | 0   | 0   | 0   | 0    |         |  | 0   | 1   | 2   | 3    | -0.16    |
| 13259376  | 2310033P09Rik | multiple myeloma tumor-associated protein 2 homolog                   | 5   | 5   | 5   | 15   | 0.08    |  | 5   | 2   | 5   | 12   | 0.03     |
| 21312058  | Fam125a       | multivesicular body subunit 12A                                       | 0   | 0   | 1   | 1    | -0.61 # |  | 0   | 0   | 0   | 0    |          |
| 46411182  | Mbnl1         | muscleblind-like protein 1                                            | 2   | 0   | 0   | 2    | -0.02   |  | 0   | 0   | 0   | 0    |          |
| 46411185  | Mbnl2         | muscleblind-like protein 2 isoform 2                                  | 0   | 4   | 0   | 4    | 0.04    |  | 0   | 0   | 0   | 0    |          |
| 31982724  | Mybbp1a       | myb-binding protein 1A                                                | 522 | 602 | 560 | 1684 | -0.03   |  | 355 | 718 | 833 | 1906 | 0.01     |
| 134053947 | Bin1          | myc box-dependent-interacting protein 1 isoform 2                     | 0   | 0   | 1   | 1    | 0.00    |  | 0   | 0   | 0   | 0    |          |
| 114155153 | Maz           | myc-associated zinc finger protein                                    | 5   | 26  | 5   | 36   | -0.15   |  | 0   | 0   | 0   | 0    |          |
| 256355182 | Mina          | myc-induced nuclear antigen                                           | 4   | 7   | 6   | 17   | 0.18    |  | 0   | 0   | 0   | 0    |          |
| 244790087 | Myef2         | myelin expression factor 2 isoform 1                                  | 21  | 24  | 7   | 52   | -0.03   |  | 0   | 33  | 66  | 99   | 0.09     |
| 244790091 | Myef2         | myelin expression factor 2 isoform 2                                  | 0   | 31  | 0   | 31   | -0.30   |  | 0   | 0   | 0   | 0    |          |
| 244790095 | Myef2         | myelin expression factor 2 isoform 3                                  | 37  | 0   | 16  | 53   | -0.25   |  | 72  | 40  | 101 | 213  | 0.07     |
| 118130868 | Mllt6         | myeloid/lymphoid or mixed lineage-leukemia translocation to 6 homolog | 0   | 1   | 2   | 3    | -0.47   |  | 0   | 0   | 3   | 3    | 0.05     |
| 148271073 | Myadm         | myeloid-associated differentiation marker                             | 2   | 5   | 2   | 9    | 0.41    |  | 2   | 4   | 3   | 9    | 0.64 *,# |
| 153791796 | Myof          | myoferlin                                                             | 0   | 0   | 3   | 3    | -0.15   |  | 0   | 2   | 2   | 4    | -3.00 #  |
| 164664497 | Myl1          | myosin light chain 1/3, skeletal muscle isoform isoform 3f            | 4   | 7   | 5   | 16   | -0.30   |  | 7   | 0   | 3   | 10   | -0.10    |
| 126157499 | Mylk          | myosin light chain kinase, smooth muscle                              | 29  | 61  | 12  | 102  | 0.44    |  | 0   | 0   | 0   | 0    |          |
| 71037403  | 2900073G15Rik | myosin light chain, regulatory B-like                                 | 21  | 18  | 24  | 63   | -0.37   |  | 29  | 17  | 0   | 46   | -0.27    |
| 33620739  | Myl6          | myosin light polypeptide 6                                            | 27  | 31  | 15  | 73   | -0.33   |  | 70  | 0   | 0   | 70   | -0.15    |
| 94363510  | Gm5526        | myosin light polypeptide 6-like                                       | 0   | 0   | 0   | 0    |         |  | 0   | 18  | 15  | 33   | -0.47 #  |
| 21728376  | Myl12b        | myosin regulatory light chain 12B                                     | 21  | 23  | 21  | 65   | -0.33   |  | 37  | 22  | 30  | 89   | -0.31    |
| 33598964  | Myh10         | myosin-10                                                             | 28  | 56  | 38  | 122  | -0.39   |  | 0   | 69  | 97  | 166  | -0.65 #  |
| 29336026  | Myh14         | myosin-14                                                             | 0   | 0   | 0   | 0    |         |  | 29  | 0   | 41  | 70   | -0.33    |
| 114326446 | Myh9          | myosin-9 isoform 1                                                    | 243 | 433 | 327 | 1003 | -0.37   |  | 469 | 819 | 997 | 2285 | -0.38    |
| 124487037 | Myo1a         | myosin-Ia                                                             | 0   | 0   | 1   | 1    | 4.14 #  |  | 0   | 0   | 0   | 0    |          |
| 124494244 | Myo1c         | myosin-Ic isoform b                                                   | 6   | 14  | 7   | 27   | 0.05    |  | 24  | 60  | 52  | 136  | 0.27 *   |
| 118026911 | Myo1d         | myosin-I d                                                            | 0   | 1   | 0   | 1    | 0.05    |  | 0   | 7   | 5   | 12   | 0.34     |
| 46399202  | Myo5b         | myosin-Vb                                                             | 1   | 0   | 0   | 1    | 0.33    |  | 0   | 5   | 1   | 6    | 0.67 #   |
| 124486759 | Myo5c         | myosin-Vc                                                             | 0   | 0   | 0   | 0    |         |  | 0   | 1   | 0   | 1    | 0.49 #   |
| 261823961 | Myo6          | myosin-VI                                                             | 33  | 37  | 22  | 92   | -0.05   |  | 28  | 95  | 134 | 257  | -0.01    |
| 22094119  | Myo18a        | myosin-XVIIIa                                                         | 31  | 63  | 18  | 112  | 0.17    |  | 0   | 0   | 0   | 0    |          |
| 6679961   | Mtpn          | myotrophin                                                            | 0   | 0   | 2   | 2    | -0.19   |  | 0   | 0   | 0   | 0    |          |
| 6678768   | Marcks        | myristoylated alanine-rich C-kinase substrate                         | 6   | 6   | 6   | 18   | -0.10   |  | 0   | 1   | 4   | 5    | 0.34     |
| 299522791 | Ddah2         | N(G),N(G)-dimethylarginine dimethylaminohydrolase 2 isoform 1         | 3   | 0   | 1   | 4    | -0.31   |  | 0   | 0   | 0   | 0    |          |
| 77627973  | Mettl3        | N6-adenosine-methyltransferase 70 kDa subunit                         | 0   | 1   | 1   | 2    | 0.39    |  | 0   | 0   | 0   | 0    |          |
| 6755566   | Slc9a3r1      | Na(+)/H(+) exchange regulatory cofactor NHE-RF1                       | 1   | 3   | 2   | 6    | 0.40 *  |  | 0   | 0   | 0   | 0    |          |
| 226246650 | Slc9a3r2      | Na(+)/H(+) exchange regulatory cofactor NHE-RF2 isoform B             | 0   | 1   | 0   | 1    | 0.93 #  |  | 0   | 0   | 0   | 0    |          |
| 309264703 | Naaladl2      | N-acetylated alpha-linked acidic dipeptidase-like 2                   | 0   | 0   | 0   | 0    |         |  | 0   | 0   | 1   | 1    | 0.08     |
| 23346561  | Nat10         | N-acetyltransferase 10                                                | 23  | 28  | 24  | 75   | 0.01    |  | 34  | 131 | 188 | 353  | 0.00     |
| 124487021 | Esco1         | N-acetyltransferase ESCO1                                             | 2   | 3   | 4   | 9    | 0.17    |  | 0   | 1   | 4   | 5    | -0.06    |
| 247269309 | Cmas          | N-acylneuraminate cytidyltransferase                                  | 23  | 32  | 22  | 77   | 0.02    |  | 2   | 5   | 7   | 14   | -0.02    |
| 13385586  | Nanp          | N-acylneuraminate-9-phosphatase                                       | 0   | 0   | 0   | 0    |         |  | 0   | 1   | 1   | 2    | -0.07    |
| 94400773  | Nqo1          | NAD(P)H dehydrogenase [quinone] 1                                     | 1   | 2   | 1   | 4    | 0.22    |  | 0   | 3   | 4   | 7    | -0.23    |
| 254939656 | Sirt6         | NAD-dependent deacetylase sirtuin-6 isoform 2                         | 4   | 4   | 0   | 8    | 0.16    |  | 0   | 1   | 3   | 4    | 0.17     |
| 165932356 | Sirt7         | NAD-dependent deacetylase sirtuin-7                                   | 2   | 2   | 2   | 6    | -0.17   |  | 0   | 0   | 0   | 0    |          |
| 309263866 | LOC100505264  | NAD-dependent malic enzyme, mitochondrial-like                        | 3   | 0   | 1   | 4    | -0.13   |  | 0   | 0   | 0   | 0    |          |

|           |         |                                                                                        |    |    |    |    |        |    |    |    |    |       |
|-----------|---------|----------------------------------------------------------------------------------------|----|----|----|----|--------|----|----|----|----|-------|
| 13195624  | Ndufa10 | NADH dehydrogenase [ubiquinone] 1 alpha subcomplex subunit 10, mitochondrial precursor | 4  | 3  | 1  | 8  | 0.11   | 10 | 8  | 11 | 29 | 0.01  |
| 226437665 | Ndufa11 | NADH dehydrogenase [ubiquinone] 1 alpha subcomplex subunit 11                          | 7  | 0  | 3  | 10 | -0.75# | 2  | 1  | 0  | 3  | 0.00  |
| 27228985  | Ndufa12 | NADH dehydrogenase [ubiquinone] 1 alpha subcomplex subunit 12                          | 7  | 4  | 5  | 16 | -0.02  | 0  | 0  | 4  | 4  | 0.13  |
| 12963633  | Ndufa13 | NADH dehydrogenase [ubiquinone] 1 alpha subcomplex subunit 13                          | 3  | 4  | 2  | 9  | -0.03  | 0  | 0  | 0  | 0  |       |
| 31981600  | Ndufa2  | NADH dehydrogenase [ubiquinone] 1 alpha subcomplex subunit 2                           | 0  | 0  | 1  | 1  | 0.23   | 2  | 1  | 2  | 5  | 0.06  |
| 33563266  | Ndufa4  | NADH dehydrogenase [ubiquinone] 1 alpha subcomplex subunit 4                           | 3  | 2  | 1  | 6  | 0.01   | 2  | 0  | 3  | 5  | 0.39  |
| 13386100  | Ndufa5  | NADH dehydrogenase [ubiquinone] 1 alpha subcomplex subunit 5                           | 2  | 0  | 2  | 4  | 0.00   | 4  | 0  | 2  | 6  | 0.21  |
| 13385492  | Ndufa6  | NADH dehydrogenase [ubiquinone] 1 alpha subcomplex subunit 6                           | 0  | 0  | 1  | 1  | 0.36   | 0  | 0  | 0  | 0  |       |
| 12963571  | Ndufa7  | NADH dehydrogenase [ubiquinone] 1 alpha subcomplex subunit 7                           | 6  | 3  | 2  | 11 | -0.05  | 3  | 0  | 1  | 4  | 0.08  |
| 21312012  | Ndufa8  | NADH dehydrogenase [ubiquinone] 1 alpha subcomplex subunit 8                           | 6  | 5  | 2  | 13 | -0.06  | 1  | 2  | 2  | 5  | 0.04  |
| 254692859 | Ndufa9  | NADH dehydrogenase [ubiquinone] 1 alpha subcomplex subunit 9, mitochondrial precursor  | 1  | 6  | 8  | 15 | 0.00   | 16 | 15 | 18 | 49 | 0.23  |
| 58037109  | Ndufb10 | NADH dehydrogenase [ubiquinone] 1 beta subcomplex subunit 10                           | 11 | 6  | 7  | 24 | -0.01  | 13 | 13 | 13 | 39 | 0.08  |
| 158631246 | Ndufb11 | NADH dehydrogenase [ubiquinone] 1 beta subcomplex subunit 11, mitochondrial            | 5  | 4  | 6  | 15 | -0.01  | 2  | 0  | 3  | 5  | 0.05  |
| 13385054  | Ndufb3  | NADH dehydrogenase [ubiquinone] 1 beta subcomplex subunit 3                            | 0  | 0  | 4  | 4  | 0.07   | 1  | 2  | 1  | 4  | -0.02 |
| 149266669 | Gm3244  | NADH dehydrogenase [ubiquinone] 1 beta subcomplex subunit 4-like                       | 1  | 2  | 2  | 5  | 0.07   | 3  | 1  | 1  | 5  | 0.21  |
| 27754144  | Ndufb5  | NADH dehydrogenase [ubiquinone] 1 beta subcomplex subunit 5, mitochondrial precursor   | 5  | 2  | 2  | 9  | -0.03  | 8  | 0  | 1  | 9  | -0.17 |
| 84781779  | Ndufb6  | NADH dehydrogenase [ubiquinone] 1 beta subcomplex subunit 6                            | 4  | 3  | 3  | 10 | 0.01   | 1  | 2  | 2  | 5  | 0.02  |
| 13385322  | Ndufb7  | NADH dehydrogenase [ubiquinone] 1 beta subcomplex subunit 7                            | 2  | 0  | 0  | 2  | -0.19  | 0  | 0  | 0  | 0  |       |
| 13385558  | Ndufb8  | NADH dehydrogenase [ubiquinone] 1 beta subcomplex subunit 8, mitochondrial precursor   | 3  | 2  | 3  | 8  | 0.09   | 0  | 0  | 2  | 2  | 0.29  |
| 29789148  | Ndufb9  | NADH dehydrogenase [ubiquinone] 1 beta subcomplex subunit 9                            | 1  | 0  | 2  | 3  | 0.01   | 0  | 2  | 2  | 4  | 0.16  |
| 19526814  | Ndufv1  | NADH dehydrogenase [ubiquinone] flavoprotein 1, mitochondrial precursor                | 6  | 4  | 7  | 17 | 0.00   | 4  | 3  | 7  | 14 | 0.06  |
| 110625954 | Ndufv2  | NADH dehydrogenase [ubiquinone] flavoprotein 2, mitochondrial precursor                | 7  | 10 | 11 | 28 | -0.09  | 0  | 3  | 4  | 7  | 0.10  |
| 140972309 | Ndufv3  | NADH dehydrogenase [ubiquinone] flavoprotein 3, mitochondrial isoform 1                | 0  | 0  | 1  | 1  | 0.16   | 0  | 0  | 0  | 0  |       |
| 23346461  | Ndufs2  | NADH dehydrogenase [ubiquinone] iron-sulfur protein 2, mitochondrial precursor         | 0  | 0  | 0  | 0  |        | 0  | 1  | 4  | 5  | 0.06  |
| 58037117  | Ndufs3  | NADH dehydrogenase [ubiquinone] iron-sulfur protein 3, mitochondrial precursor         | 14 | 6  | 10 | 30 | 0.00   | 16 | 12 | 11 | 39 | -0.02 |
| 281485615 | Ndufs4  | NADH dehydrogenase [ubiquinone] iron-sulfur protein 4, mitochondrial                   | 5  | 3  | 4  | 12 | -0.11  | 0  | 0  | 3  | 3  | 0.16  |
| 72004262  | Ndufs5  | NADH dehydrogenase [ubiquinone] iron-sulfur protein 5                                  | 4  | 0  | 4  | 8  | -0.12* | 5  | 2  | 4  | 11 | -0.14 |
| 56711244  | Ndufs6  | NADH dehydrogenase [ubiquinone] iron-sulfur protein 6, mitochondrial precursor         | 4  | 0  | 4  | 8  | -0.12  | 3  | 0  | 0  | 3  | -0.15 |

|           |              |                                                                                |     |     |     |      |         |     |     |     |      |          |
|-----------|--------------|--------------------------------------------------------------------------------|-----|-----|-----|------|---------|-----|-----|-----|------|----------|
| 309265963 | Gm6415       | NADH dehydrogenase [ubiquinone] iron-sulfur protein 6, mitochondrial-like      | 0   | 2   | 0   | 2    | -0.08   | 0   | 0   | 2   | 2    | 0.28     |
| 21312950  | Ndufs7       | NADH dehydrogenase [ubiquinone] iron-sulfur protein 7, mitochondrial precursor | 4   | 3   | 2   | 9    | 0.02    | 0   | 3   | 3   | 6    | 0.05     |
| 46195430  | Ndufs8       | NADH dehydrogenase [ubiquinone] iron-sulfur protein 8, mitochondrial precursor | 4   | 4   | 3   | 11   | -0.60 # | 2   | 3   | 1   | 6    | -0.24    |
| 167716837 | ND1          | NADH dehydrogenase subunit 1                                                   | 2   | 2   | 1   | 5    | 0.30    | 0   | 2   | 2   | 4    | 0.41     |
| 167716838 | ND2          | NADH dehydrogenase subunit 2                                                   | 1   | 1   | 1   | 3    | -0.11   | 1   | 3   | 2   | 6    | 0.10     |
| 226453482 | ND3          | NADH dehydrogenase subunit 3                                                   | 2   | 3   | 1   | 6    | 0.13    | 1   | 0   | 1   | 2    | -0.18    |
| 167716846 | ND4          | NADH dehydrogenase subunit 4                                                   | 1   | 5   | 1   | 7    | -0.05   | 7   | 3   | 0   | 10   | -0.13    |
| 34538607  | ND4          | NADH dehydrogenase subunit 4                                                   | 0   | 0   | 0   | 0    |         | 0   | 0   | 2   | 2    | -0.04    |
| 34538608  | ND5          | NADH dehydrogenase subunit 5                                                   | 0   | 0   | 0   | 0    |         | 2   | 0   | 0   | 2    | 0.16     |
| 21312524  | Cyb5r1       | NADH-cytochrome b5 reductase 1                                                 | 0   | 0   | 2   | 2    | -0.38   | 0   | 1   | 1   | 2    | 0.09     |
| 19745150  | Cyb5r3       | NADH-cytochrome b5 reductase 3                                                 | 42  | 18  | 36  | 96   | -0.18 * | 73  | 8   | 21  | 102  | -0.16    |
| 229892318 | Ndufs1       | NADH-ubiquinone oxidoreductase 75 kDa subunit, mitochondrial precursor         | 4   | 5   | 8   | 17   | -0.18   | 11  | 3   | 11  | 25   | 0.10     |
| 312147392 | Me1          | NADP-dependent malic enzyme isoform 2                                          | 0   | 0   | 0   | 0    |         | 0   | 0   | 1   | 1    | 0.03     |
| 6679767   | Fdxr         | NADPH:adrenodoxin oxidoreductase, mitochondrial precursor                      | 1   | 0   | 3   | 4    | -0.03   | 0   | 0   | 0   | 0    |          |
| 6679421   | Por          | NADPH--cytochrome P450 reductase                                               | 13  | 2   | 5   | 20   | -0.21   | 35  | 2   | 3   | 40   | -0.28    |
| 295789090 | Naa10        | N-alpha-acetyltransferase 10, NatA catalytic subunit isoform 2                 | 4   | 5   | 5   | 14   | 0.13    | 0   | 0   | 3   | 3    | -0.04    |
| 225543482 | Naa15        | N-alpha-acetyltransferase 15, NatA auxiliary subunit                           | 0   | 1   | 0   | 1    | -0.19   | 0   | 0   | 0   | 0    |          |
| 213972579 | Naa20        | N-alpha-acetyltransferase 20, NatB catalytic subunit isoform 1                 | 3   | 5   | 6   | 14   | -0.03   | 0   | 0   | 0   | 0    |          |
| 55742803  | Naa25        | N-alpha-acetyltransferase 25, NatB auxiliary subunit                           | 0   | 7   | 8   | 15   | 0.11    | 0   | 1   | 2   | 3    | 0.04     |
| 19527156  | Naa38        | N-alpha-acetyltransferase 38, NatC auxiliary subunit                           | 24  | 22  | 16  | 62   | 0.05    | 12  | 11  | 0   | 23   | 0.09     |
| 254588079 | Naa40        | N-alpha-acetyltransferase 40, NatD catalytic subunit                           | 6   | 6   | 0   | 12   | 0.40    | 26  | 32  | 22  | 80   | 0.10     |
| 21312422  | Naa50        | N-alpha-acetyltransferase 50, NatE catalytic subunit                           | 18  | 19  | 13  | 50   | 0.00    | 1   | 0   | 2   | 3    | -0.25    |
| 31559918  | Nrd1         | nardilysin precursor                                                           | 1   | 1   | 1   | 3    | 0.14    | 0   | 0   | 0   | 0    |          |
| 41350312  | Naca         | nascent polypeptide-associated complex subunit alpha isoform b                 | 14  | 14  | 17  | 45   | -0.27   | 0   | 3   | 10  | 13   | 0.03     |
| 28395023  | Nckap1       | nck-associated protein 1                                                       | 13  | 28  | 26  | 67   | -0.15   | 0   | 4   | 10  | 14   | 0.17     |
| 31981859  | N4bp3        | NEDD4-binding protein 3                                                        | 0   | 0   | 0   | 0    |         | 1   | 0   | 0   | 1    | -10.02 # |
| 6679034   | Nedd8        | NEDD8 precursor                                                                | 0   | 1   | 0   | 1    | -0.06   | 0   | 0   | 0   | 0    |          |
| 21704162  | Ube2m        | NEDD8-conjugating enzyme Ubc12 isoform 1                                       | 3   | 2   | 3   | 8    | 0.24    | 0   | 1   | 4   | 5    | 0.15     |
| 31560083  | Fam192a      | NEFA-interacting nuclear protein NIP30                                         | 0   | 0   | 0   | 0    |         | 0   | 1   | 0   | 1    | 10.07 #  |
| 33859652  | Whsc2        | negative elongation factor A                                                   | 0   | 5   | 1   | 6    | 0.04    | 0   | 0   | 0   | 0    |          |
| 165377251 | Cobra1       | negative elongation factor B                                                   | 9   | 9   | 2   | 20   | -0.08   | 0   | 1   | 0   | 1    | -0.09    |
| 91982765  | Th1l         | negative elongation factor D                                                   | 8   | 4   | 1   | 13   | -0.62 # | 0   | 1   | 1   | 2    | 0.03     |
| 114052228 | Rdbp         | negative elongation factor E                                                   | 3   | 6   | 5   | 14   | 0.14    | 0   | 2   | 0   | 2    | 0.21     |
| 6754870   | Cox4nb       | neighbor of COX4                                                               | 4   | 11  | 9   | 24   | -0.30 * | 4   | 4   | 5   | 13   | -0.34    |
| 71067128  | Npnt         | nephronectin isoform b                                                         | 0   | 0   | 0   | 0    |         | 0   | 0   | 24  | 24   | -1.07 #  |
| 119120865 | Syne1        | nesprin-1 isoform 3                                                            | 0   | 3   | 0   | 3    | -1.74 # | 0   | 0   | 0   | 0    |          |
| 145699091 | Syne2        | nesprin-2                                                                      | 731 | ### | ### | 2923 | 0.20 *  | ### | ### | ### | 4950 | 0.11     |
| 111607453 | 483142619Rik | nesprin-3 isoform alpha                                                        | 0   | 0   | 0   | 0    |         | 0   | 36  | 32  | 68   | -0.01    |
| 111607451 | 483142619Rik | nesprin-3 isoform beta                                                         | 0   | 0   | 0   | 0    |         | 1   | 0   | 0   | 1    | -0.41    |
| 13384818  | Nenf         | neudesin precursor                                                             | 1   | 0   | 0   | 1    | -0.01   | 0   | 0   | 0   | 0    |          |
| 58037133  | Ngdn         | neuroguidin                                                                    | 0   | 0   | 0   | 0    |         | 0   | 5   | 7   | 12   | 0.11     |
| 6679891   | Ganab        | neutral alpha-glucosidase AB                                                   | 11  | 0   | 1   | 12   | -0.40 * | 6   | 4   | 13  | 23   | -0.66 #  |
| 30520239  | Nceh1        | neutral cholesterol ester hydrolase 1                                          | 8   | 0   | 1   | 9    | -0.18   | 0   | 0   | 0   | 0    |          |
| 21312616  | Nkiras2      | NF-kappa-B inhibitor-interacting Ras-like protein 2                            | 0   | 2   | 0   | 2    | 0.23    | 0   | 0   | 0   | 0    |          |

|           |              |                                                                              |     |     |     |     |       |   |     |     |     |     |       |   |
|-----------|--------------|------------------------------------------------------------------------------|-----|-----|-----|-----|-------|---|-----|-----|-----|-----|-------|---|
| 257153408 | Nkap         | NF-kappa-B-activating protein                                                | 0   | 1   | 0   | 1   | 0.06  |   | 0   | 10  | 2   | 12  | 0.07  |   |
| 282154801 | Nfu1         | NFU1 iron-sulfur cluster scaffold homolog, mitochondrial isoform 2 precursor | 7   | 0   | 1   | 8   | -0.06 |   | 0   | 1   | 1   | 2   | 0.46  | # |
| 31543307  | Nab1         | NGFI-A-binding protein 1                                                     | 0   | 1   | 1   | 2   | 0.46  |   | 0   | 0   | 0   | 0   |       |   |
| 187960092 | Ogg1         | N-glycosylase/DNA lyase                                                      | 4   | 2   | 1   | 7   | -0.08 |   | 0   | 0   | 0   | 0   |       |   |
| 309261987 | LOC100505330 | NHP2-like protein 1-like                                                     | 1   | 24  | 25  | 50  | -0.05 |   | 105 | 44  | 3   | 152 | 0.52  | # |
| 309266474 | Gm5616       | NHP2-like protein 1-like                                                     | 0   | 0   | 0   | 0   |       |   | 0   | 1   | 27  | 28  | -0.05 |   |
| 82930015  | Gm5616       | NHP2-like protein 1-like                                                     | 30  | 0   | 0   | 30  | -0.05 |   | 0   | 0   | 0   | 0   |       |   |
| 22122641  | Fam129b      | niban-like protein 1                                                         | 0   | 1   | 0   | 1   | 0.31  |   | 0   | 0   | 0   | 0   |       |   |
| 145386524 | Nbn          | nibrin                                                                       | 0   | 5   | 1   | 6   | 0.03  |   | 0   | 0   | 0   | 0   |       |   |
| 224809376 | Ncstn        | nicastrin precursor                                                          | 0   | 0   | 0   | 0   |       |   | 1   | 0   | 0   | 1   | -3.13 | # |
| 21362329  | Nmnat3       | nicotinamide mononucleotide adenylyltransferase 3                            | 8   | 3   | 0   | 11  | 0.14  |   | 0   | 1   | 0   | 1   | -3.94 | # |
| 257153454 | Nampt        | nicotinamide phosphoribosyltransferase                                       | 0   | 0   | 0   | 0   |       |   | 3   | 11  | 33  | 47  | -0.12 |   |
| 51371928  | Nipbl        | nipped-B-like protein isoform B                                              | 61  | 59  | 52  | 172 | 0.14  |   | 10  | 141 | 125 | 276 | -0.10 |   |
| 254826728 | Nosip        | nitric oxide synthase-interacting protein isoform 2                          | 17  | 12  | 12  | 41  | 0.19  | * | 0   | 0   | 4   | 4   | 0.01  |   |
| 24431937  | Nmral1       | nmrA-like family domain-containing protein 1                                 | 0   | 0   | 0   | 0   |       |   | 0   | 1   | 2   | 3   | -0.58 | # |
| 33469125  | Nmi          | N-myc-interactor                                                             | 0   | 1   | 0   | 1   | 1.10  | # | 0   | 0   | 0   | 0   |       |   |
| 227908803 | Nomo1        | nodal modulator 1                                                            | 12  | 0   | 1   | 13  | -0.44 |   | 0   | 0   | 0   | 0   |       |   |
| 149257848 | LOC100044391 | non-histone chromosomal protein HMG-14-like                                  | 27  | 21  | 17  | 65  | 0.06  |   | 35  | 33  | 16  | 84  | -0.10 |   |
| 309271129 | LOC100503331 | non-histone chromosomal protein HMG-17-like                                  | 16  | 19  | 9   | 44  | -0.13 | * | 94  | 22  | 0   | 116 | -0.23 |   |
| 309268322 | LOC100503799 | non-histone chromosomal protein HMG-17-like                                  | 0   | 0   | 0   | 0   |       |   | 0   | 21  | 0   | 21  | -0.14 |   |
| 149263574 | Gm6750       | non-histone chromosomal protein HMG-17-like                                  | 15  | 9   | 5   | 29  | -0.14 | * | 0   | 0   | 0   | 0   |       |   |
| 158517917 | Nhej1        | non-homologous end-joining factor 1                                          | 1   | 0   | 0   | 1   | -0.09 |   | 0   | 0   | 0   | 0   |       |   |
| 255958247 | Nono         | non-POU domain-containing octamer-binding protein                            | 207 | 200 | 151 | 558 | -0.03 |   | 176 | 200 | 147 | 523 | -0.06 |   |
| 133922607 | Tyk2         | non-receptor tyrosine-protein kinase TYK2 isoform 2                          | 0   | 0   | 0   | 0   |       |   | 0   | 0   | 1   | 1   | 0.23  |   |
| 169234780 | Ncapg        | non-SMC condensin I complex, subunit G                                       | 3   | 7   | 2   | 12  | 0.31  |   | 0   | 2   | 2   | 4   | -0.02 |   |
| 242246981 | Nsmce4a      | non-SMC element 4 homolog A                                                  | 12  | 13  | 8   | 33  | 0.02  |   | 8   | 25  | 19  | 52  | -0.21 |   |
| 45476581  | Scp2         | non-specific lipid-transfer protein                                          | 28  | 11  | 23  | 62  | -0.08 | * | 0   | 0   | 1   | 1   | 0.02  |   |
| 34328291  | Nsmce1       | non-structural maintenance of chromosomes element 1 homolog                  | 4   | 14  | 7   | 25  | 0.02  |   | 4   | 10  | 6   | 20  | -0.06 |   |
| 238624156 | Nle1         | notchless protein homolog 1                                                  | 0   | 0   | 0   | 0   |       |   | 0   | 1   | 1   | 2   | 0.02  |   |
| 294459934 | Gm13698      | novel protein containing MIF4G and MA3 domains                               | 0   | 6   | 5   | 11  | 0.00  |   | 28  | 56  | 60  | 144 | 0.21  |   |
| 38198665  | Nsfl1c       | NSFL1 cofactor p47                                                           | 0   | 0   | 0   | 0   |       |   | 0   | 0   | 3   | 3   | -0.06 |   |
| 12963867  | Scyl1        | N-terminal kinase-like protein                                               | 0   | 0   | 1   | 1   | 0.62  | # | 0   | 0   | 2   | 2   | 0.04  |   |
| 158749551 | Nxt1         | NTF2-related export protein 1                                                | 6   | 6   | 5   | 17  | -0.06 |   | 1   | 2   | 1   | 4   | 0.04  |   |
| 238637330 | Nxt2         | NTF2-related export protein 2                                                | 2   | 2   | 3   | 7   | -0.02 |   | 0   | 0   | 0   | 0   |       |   |
| 37059816  | Naif1        | nuclear apoptosis-inducing factor 1                                          | 0   | 2   | 0   | 2   | -0.35 |   | 0   | 0   | 0   | 0   |       |   |
| 126090505 | Nasp         | nuclear autoantigenic sperm protein isoform 1                                | 0   | 0   | 0   | 0   |       |   | 0   | 0   | 1   | 1   | 0.33  |   |
| 144922627 | Ncbp1        | nuclear cap-binding protein subunit 1                                        | 24  | 34  | 21  | 79  | 0.06  |   | 13  | 25  | 25  | 63  | -0.07 |   |
| 13386056  | Ncbp2        | nuclear cap-binding protein subunit 2                                        | 4   | 6   | 5   | 15  | 0.02  |   | 1   | 0   | 0   | 1   | -0.40 |   |
| 166197654 | Nde1         | nuclear distribution protein nudE homolog 1 isoform b                        | 1   | 2   | 0   | 3   | -1.34 | # | 0   | 1   | 0   | 1   | 0.80  | # |
| 156231054 | Pom121       | nuclear envelope pore membrane protein POM 121                               | 0   | 2   | 1   | 3   | 0.27  |   | 0   | 2   | 0   | 2   | -0.33 |   |
| 148747370 | Nfib         | nuclear factor 1 B-type isoform 3                                            | 8   | 16  | 4   | 28  | 0.12  |   | 0   | 1   | 0   | 1   | -0.59 | # |
| 84370351  | Nfic         | nuclear factor 1 C-type isoform b                                            | 12  | 16  | 7   | 35  | 0.27  | * | 0   | 1   | 0   | 1   | 0.27  |   |
| 117606364 | Nfkb1        | nuclear factor NF-kappa-B p105 subunit                                       | 3   | 2   | 1   | 6   | -0.36 | * | 0   | 2   | 0   | 2   | -0.75 | # |

|           |         |                                                                            |     |     |     |      |        |     |     |     |      |        |  |
|-----------|---------|----------------------------------------------------------------------------|-----|-----|-----|------|--------|-----|-----|-----|------|--------|--|
| 40254249  | Nfrkb   | nuclear factor related to kappa-B-binding protein                          | 3   | 13  | 3   | 19   | -0.40  | 0   | 0   | 0   | 0    |        |  |
| 22122685  | Ppp1r8  | nuclear inhibitor of protein phosphatase 1                                 | 11  | 20  | 17  | 48   | -0.01  | 0   | 4   | 4   | 8    | 0.03   |  |
| 6754910   | Nudc    | nuclear migration protein nudC                                             | 0   | 0   | 0   | 0    |        | 0   | 0   | 1   | 1    | -0.24  |  |
| 254675300 | Numa1   | nuclear mitotic apparatus protein 1                                        | 413 | 519 | 438 | 1370 | 0.22*  | 283 | 396 | 363 | 1042 | 0.20   |  |
| 29789351  | Nup107  | nuclear pore complex protein Nup107                                        | 39  | 48  | 36  | 123  | -0.15  | 30  | 60  | 53  | 143  | 0.06   |  |
| 283806543 | Nup133  | nuclear pore complex protein Nup133                                        | 89  | 109 | 123 | 321  | -0.10  | 60  | 158 | 174 | 392  | 0.04*  |  |
| 165932389 | Nup155  | nuclear pore complex protein Nup155                                        | 133 | 135 | 123 | 391  | -0.12  | 86  | 217 | 211 | 514  | 0.00   |  |
| 10946932  | Nup160  | nuclear pore complex protein Nup160                                        | 124 | 154 | 111 | 389  | -0.18* | 58  | 202 | 156 | 416  | -0.03  |  |
| 124378033 | Nup214  | nuclear pore complex protein Nup214                                        | 38  | 74  | 40  | 152  | 0.07   | 2   | 9   | 15  | 26   | 0.19   |  |
| 38016154  | Nup50   | nuclear pore complex protein Nup50                                         | 32  | 41  | 39  | 112  | 0.07   | 28  | 37  | 29  | 94   | 0.27*  |  |
| 39930543  | Nup54   | nuclear pore complex protein Nup54                                         | 46  | 36  | 37  | 119  | -0.05  | 7   | 31  | 9   | 47   | -0.20  |  |
| 108773813 | Nup85   | nuclear pore complex protein Nup85                                         | 32  | 39  | 20  | 91   | -0.14  | 24  | 33  | 15  | 72   | -1.02# |  |
| 111955409 | Nup88   | nuclear pore complex protein Nup88 isoform 1                               | 20  | 28  | 15  | 63   | -0.13  | 8   | 8   | 17  | 33   | -0.07  |  |
| 27369533  | Nup93   | nuclear pore complex protein Nup93                                         | 47  | 64  | 29  | 140  | -0.17  | 74  | 73  | 69  | 216  | -0.03* |  |
| 270309140 | Tpr     | nuclear pore complex-associated protein Tpr                                | 600 | 615 | 457 | 1672 | -0.02  | 106 | 125 | 24  | 255  | 0.10   |  |
| 16716349  | Nup62   | nuclear pore glycoprotein p62                                              | 46  | 49  | 29  | 124  | -0.14  | 5   | 16  | 5   | 26   | -0.08  |  |
| 172073152 | Nup210  | nuclear pore membrane glycoprotein 210 precursor                           | 136 | 178 | 170 | 484  | -0.19  | 125 | 233 | 152 | 510  | 0.05   |  |
| 303324586 | Nploc4  | nuclear protein localization protein 4 homolog isoform A                   | 0   | 0   | 2   | 2    | -0.21  | 0   | 0   | 0   | 0    |        |  |
| 41054974  | Nploc4  | nuclear protein localization protein 4 homolog isoform B                   | 4   | 3   | 0   | 7    | 0.20   | 0   | 0   | 0   | 0    |        |  |
| 21450271  | Ncoa5   | nuclear receptor coactivator 5                                             | 16  | 32  | 14  | 62   | -0.05  | 7   | 21  | 7   | 35   | -0.16  |  |
| 145587671 | Ncoa6   | nuclear receptor coactivator 6                                             | 2   | 3   | 0   | 5    | 0.08   | 0   | 0   | 0   | 0    |        |  |
| 119226235 | Ncor2   | nuclear receptor corepressor 2                                             | 0   | 3   | 1   | 4    | 0.53   | 0   | 0   | 0   | 0    |        |  |
| 171846245 | Nr2c1   | nuclear receptor subfamily 2 group C member 1                              | 0   | 1   | 0   | 1    | 0.14   | 0   | 0   | 0   | 0    |        |  |
| 67906168  | Nr2c2   | nuclear receptor subfamily 2 group C member 2                              | 0   | 1   | 0   | 1    | 0.47   | 0   | 0   | 0   | 0    |        |  |
| 112807199 | Nr2f6   | nuclear receptor subfamily 2 group F member 6                              | 12  | 11  | 11  | 34   | 0.01   | 0   | 5   | 2   | 7    | 0.06   |  |
| 255982548 | Nrf1    | nuclear respiratory factor 1 isoform c                                     | 1   | 4   | 1   | 6    | 0.09   | 0   | 0   | 0   | 0    |        |  |
| 31980798  | Nxf1    | nuclear RNA export factor 1                                                | 33  | 58  | 27  | 118  | 0.04   | 46  | 82  | 66  | 194  | -0.21  |  |
| 6754848   | Nfya    | nuclear transcription factor Y subunit alpha isoform b                     | 25  | 25  | 16  | 66   | -0.12  | 0   | 5   | 3   | 8    | -0.01  |  |
| 6754850   | Nfyb    | nuclear transcription factor Y subunit beta                                | 4   | 4   | 1   | 9    | 0.06   | 0   | 0   | 0   | 0    |        |  |
| 31560663  | Nfyc    | nuclear transcription factor Y subunit gamma                               | 14  | 14  | 5   | 33   | -0.12  | 0   | 1   | 0   | 1    | 0.19   |  |
| 82995559  | Gm10349 | nuclear transport factor 2-like                                            | 5   | 2   | 2   | 9    | 0.12   | 0   | 0   | 0   | 0    |        |  |
| 224809563 | Nucks1  | nuclear ubiquitous casein and cyclin-dependent kinases substrate isoform 2 | 2   | 4   | 5   | 11   | -0.26  | 1   | 5   | 10  | 16   | -0.01  |  |
| 33468981  | Nvl     | nuclear valosin-containing protein-like                                    | 3   | 4   | 3   | 10   | 0.15   | 0   | 9   | 15  | 24   | 0.49#  |  |
| 27370072  | Zc3hc1  | nuclear-interacting partner of ALK                                         | 17  | 8   | 3   | 28   | 0.06   | 5   | 16  | 6   | 27   | -0.02  |  |
| 113205059 | Ybx1    | nuclease-sensitive element-binding protein 1                               | 10  | 15  | 21  | 46   | 0.11   | 21  | 22  | 42  | 85   | -0.07  |  |
| 254750698 | Nucb1   | nucleobindin-1 isoform 1                                                   | 1   | 0   | 0   | 1    | -5.16# | 0   | 0   | 0   | 0    |        |  |
| 86198327  | Nolc1   | nucleolar and coiled-body phosphoprotein 1 isoform B                       | 27  | 41  | 33  | 101  | -0.02  | 64  | 113 | 74  | 251  | -0.08  |  |
| 124301227 | Noc2l   | nucleolar complex protein 2 homolog                                        | 2   | 5   | 2   | 9    | 0.02   | 4   | 17  | 39  | 60   | 0.12   |  |
| 188497644 | Noc3l   | nucleolar complex protein 3 homolog                                        | 2   | 2   | 0   | 4    | 0.20   | 6   | 11  | 29  | 46   | 0.12   |  |
| 31981994  | Noc4l   | nucleolar complex protein 4 homolog                                        | 1   | 3   | 1   | 5    | -0.47  | 1   | 20  | 18  | 39   | -0.05  |  |
| 31560110  | Gtpbp4  | nucleolar GTP-binding protein 1                                            | 0   | 0   | 0   | 0    |        | 3   | 10  | 16  | 29   | 0.03   |  |
| 240120093 | Gnl2    | nucleolar GTP-binding protein 2                                            | 0   | 0   | 0   | 0    |        | 0   | 1   | 12  | 13   | -0.04  |  |
| 134288861 | Nom1    | nucleolar MIF4G domain-containing protein 1                                | 0   | 0   | 0   | 0    |        | 0   | 2   | 3   | 5    | 0.26   |  |

|           |              |                                                                         |     |     |     |     |       |     |     |     |      |       |       |
|-----------|--------------|-------------------------------------------------------------------------|-----|-----|-----|-----|-------|-----|-----|-----|------|-------|-------|
| 256818750 | Urb1         | nucleolar pre-ribosomal-associated protein 1                            | 41  | 92  | 51  | 184 | -0.07 | 11  | 94  | 125 | 230  | -0.07 | *     |
| 56606027  | Nol10        | nucleolar protein 10                                                    | 0   | 0   | 0   | 0   |       | 1   | 11  | 15  | 27   | -0.07 |       |
| 238550126 | Nol11        | nucleolar protein 11 isoform 2                                          | 0   | 1   | 0   | 1   | -0.15 | 10  | 7   | 5   | 22   | 0.01  |       |
| 31542287  | Nol12        | nucleolar protein 12                                                    | 0   | 0   | 0   | 0   |       | 0   | 0   | 1   | 1    | -0.02 |       |
| 114158701 | Nop14        | nucleolar protein 14                                                    | 0   | 0   | 0   | 0   |       | 5   | 39  | 29  | 73   | -0.02 |       |
| 30519925  | Nop16        | nucleolar protein 16                                                    | 1   | 1   | 0   | 2   | -0.43 | 1   | 9   | 13  | 23   | 0.45  | #     |
| 126090932 | Nop56        | nucleolar protein 56                                                    | 111 | 122 | 85  | 318 | -0.11 | 467 | 397 | 588 | 1452 | -0.04 |       |
| 120407050 | Nop58        | nucleolar protein 58                                                    | 94  | 109 | 65  | 268 | -0.08 | 313 | 277 | 414 | 1004 | -0.01 |       |
| 118026904 | Nol6         | nucleolar protein 6                                                     | 18  | 18  | 9   | 45  | 0.01  | 8   | 55  | 79  | 142  | -0.20 |       |
| 117647257 | Nol7         | nucleolar protein 7                                                     | 1   | 0   | 3   | 4   | -0.17 | 11  | 20  | 16  | 47   | -0.04 |       |
| 72384374  | Ddx21        | nucleolar RNA helicase 2                                                | 165 | 202 | 185 | 552 | 0.02  | 228 | 443 | 551 | 1222 | 0.03  |       |
| 113205053 | Ubtf         | nucleolar transcription factor 1 isoform 2                              | 20  | 42  | 20  | 82  | -0.24 | 26  | 40  | 52  | 118  | -0.26 |       |
| 84875537  | Ncl          | nucleolin                                                               | 61  | 87  | 87  | 235 | 0.03  | 385 | 362 | 349 | 1096 | 0.05  |       |
| 6755783   | Tia1         | nucleolysin TIA-1 isoform 1                                             | 9   | 6   | 0   | 15  | -0.07 | 0   | 9   | 0   | 9    | 0.25  |       |
| 255760009 | Tia1         | nucleolysin TIA-1 isoform 2                                             | 0   | 11  | 0   | 11  | -0.24 | 0   | 0   | 0   | 0    |       |       |
| 255760011 | Tia1         | nucleolysin TIA-1 isoform 3                                             | 9   | 0   | 8   | 17  | -0.05 | 5   | 5   | 3   | 13   | -0.12 |       |
| 6678349   | Tial1        | nucleolysin TIAR                                                        | 10  | 20  | 13  | 43  | -0.09 | 0   | 11  | 8   | 19   | 0.04  |       |
| 6679108   | Npm1         | nucleophosmin                                                           | 124 | 0   | 143 | 267 | 0.09  | *   | 258 | 141 | 157  | 556   | 0.03  |
| 149251776 | LOC100046628 | nucleophosmin-like                                                      | 117 | 316 | 137 | 570 | 0.03  | 0   | 1   | 6   | 7    | 0.04  |       |
| 6679110   | Npm3         | nucleoplasmin-3                                                         | 14  | 16  | 10  | 40  | 0.05  | 9   | 13  | 10  | 32   | -0.05 |       |
| 254588102 | Nup153       | nucleoporin 153                                                         | 23  | 40  | 20  | 83  | 0.02  | 2   | 4   | 1   | 7    | 0.37  |       |
| 226437676 | Nup205       | nucleoporin 205                                                         | 197 | 297 | 203 | 697 | -0.11 | 96  | 278 | 307 | 681  | 0.00  |       |
| 39930413  | Nup98        | nucleoporin 98                                                          | 15  | 17  | 11  | 43  | 0.00  | 0   | 18  | 9   | 27   | -0.08 |       |
| 58037369  | Gle1         | nucleoporin GLE1                                                        | 0   | 2   | 0   | 2   | -0.51 | 0   | 7   | 11  | 18   | 0.13  |       |
| 28077005  | Tmem48       | nucleoporin NDC1                                                        | 13  | 6   | 4   | 23  | -0.16 | 2   | 24  | 10  | 36   | -0.24 |       |
| 38678526  | Nup188       | nucleoporin NUP188 homolog                                              | 75  | 105 | 66  | 246 | -0.08 | 8   | 71  | 83  | 162  | -0.08 |       |
| 210032861 | Nup37        | nucleoporin Nup37                                                       | 21  | 34  | 14  | 69  | -0.12 | 7   | 17  | 14  | 38   | -0.02 |       |
| 166295220 | Nup43        | nucleoporin Nup43                                                       | 13  | 17  | 14  | 44  | -0.26 | 7   | 11  | 11  | 29   | -0.06 |       |
| 298231198 | Nup35        | nucleoporin NUP53 isoform 2                                             | 34  | 40  | 30  | 104 | -0.18 | 24  | 19  | 26  | 69   | -0.04 |       |
| 24497431  | Nupl1        | nucleoporin p58/p45                                                     | 23  | 29  | 17  | 69  | -0.15 | 3   | 13  | 1   | 17   | -0.40 |       |
| 20532338  | Seh1l        | nucleoporin SEH1 isoform b                                              | 33  | 34  | 27  | 94  | -0.19 | *   | 7   | 20  | 9    | 36    | 0.02  |
| 254540171 | Nupl2        | nucleoporin-like protein 2                                              | 0   | 0   | 0   | 0   |       | 0   | 1   | 0   | 1    | 0.58  | #     |
| 255308888 | Nme3         | nucleoside diphosphate kinase 3                                         | 6   | 3   | 2   | 11  | 0.29  | 0   | 0   | 1   | 1    | 0.25  |       |
| 9055290   | Nme6         | nucleoside diphosphate kinase 6                                         | 1   | 5   | 2   | 8   | -0.04 | 0   | 0   | 0   | 0    |       |       |
| 37700232  | Nme1         | nucleoside diphosphate kinase A                                         | 5   | 4   | 7   | 16  | 0.29  | *   | 0   | 0   | 0    | 0     |       |
| 6679078   | Nme2         | nucleoside diphosphate kinase B                                         | 9   | 4   | 13  | 26  | 0.15  | 0   | 0   | 3   | 3    | 0.04  |       |
| 13384950  | Nudt8        | nucleoside diphosphate-linked moiety X motif 8, mitochondrial precursor | 0   | 1   | 0   | 1   | -0.17 | 0   | 0   | 0   | 0    |       |       |
| 7657357   | Nap11l       | nucleosome assembly protein 1-like 1 isoform 2                          | 4   | 5   | 5   | 14  | -0.19 | 1   | 7   | 8   | 16   | -0.13 |       |
| 6679012   | Nap11l4      | nucleosome assembly protein 1-like 4                                    | 2   | 2   | 5   | 9   | -0.63 | #   | 0   | 1   | 2    | 3     | -0.28 |
| 268837281 | Nacc1        | nucleus accumbens-associated protein 1                                  | 1   | 2   | 0   | 3   | -0.44 | 0   | 2   | 0   | 2    | 0.72  | #     |
| 80861479  | Nacc2        | nucleus accumbens-associated protein 2 isoform 1                        | 0   | 1   | 0   | 1   | 0.89  | #   | 0   | 0   | 0    | 0     |       |
| 133922575 | Nudcd2       | nudC domain-containing protein 2                                        | 0   | 0   | 0   | 0   |       | 0   | 1   | 2   | 3    | -0.43 |       |
| 19527352  | Nrm          | nurim                                                                   | 7   | 10  | 5   | 22  | -0.16 | 8   | 14  | 10  | 32   | -0.12 |       |
| 21313144  | Ola1         | obg-like ATPase 1 isoform a                                             | 0   | 6   | 8   | 14  | 0.08  | 0   | 0   | 14  | 14   | 0.08  |       |
| 76677915  | Ola1         | obg-like ATPase 1 isoform b                                             | 4   | 0   | 0   | 4   | 0.02  | 6   | 6   | 4   | 16   | 0.03  |       |
| 6679162   | Ocln         | occludin                                                                | 0   | 1   | 1   | 2   | 5.09  | #   | 0   | 0   | 0    | 0     |       |
| 229577360 | Ociad1       | OCIA domain-containing protein 1 isoform 3                              | 1   | 0   | 1   | 2   | 0.26  | 2   | 1   | 3   | 6    | 0.40  |       |
| 22129141  | Olfr1008     | olfactory receptor 1008                                                 | 0   | 0   | 0   | 0   |       | 0   | 0   | 1   | 1    | -0.57 | #     |
| 13384930  | Ostc         | oligosaccharyltransferase complex subunit OSTC                          | 2   | 2   | 3   | 7   | -0.28 | 7   | 0   | 5   | 12   | -0.65 | #     |
| 110625722 | Opa3         | optic atrophy 3 protein homolog                                         | 0   | 2   | 0   | 2   | -0.36 | 0   | 0   | 0   | 0    |       |       |
| 158517935 | Orc1         | origin recognition complex subunit 1 isoform A                          | 0   | 0   | 0   | 0   |       | 0   | 8   | 12  | 20   | -0.11 |       |

|           |               |                                                                        |     |     |     |     |        |  |  |     |    |     |     |        |
|-----------|---------------|------------------------------------------------------------------------|-----|-----|-----|-----|--------|--|--|-----|----|-----|-----|--------|
| 6679176   | Orc2          | origin recognition complex subunit 2 isoform A                         | 0   | 0   | 0   | 0   |        |  |  | 2   | 4  | 0   | 6   | 0.05   |
| 70909306  | Orc2          | origin recognition complex subunit 2 isoform B                         | 4   | 3   | 2   | 9   | 0.26*  |  |  | 0   | 0  | 0   | 0   |        |
| 227116263 | Orc3          | origin recognition complex subunit 3 isoform 2                         | 9   | 10  | 1   | 20  | 0.08   |  |  | 0   | 11 | 7   | 18  | -0.12  |
| 124286818 | Orc4          | origin recognition complex subunit 4 isoform 1                         | 2   | 2   | 2   | 6   | 0.08   |  |  | 0   | 6  | 4   | 10  | -0.20  |
| 6754948   | Orc5          | origin recognition complex subunit 5                                   | 5   | 6   | 1   | 12  | -0.01  |  |  | 1   | 6  | 4   | 11  | -0.51# |
| 255069719 | Orc6          | origin recognition complex subunit 6 isoform a                         | 3   | 3   | 0   | 6   | 0.02   |  |  | 0   | 0  | 0   | 0   |        |
| 22267440  | Ostf1         | osteoclast-stimulating factor 1                                        | 3   | 1   | 2   | 6   | -0.06  |  |  | 0   | 6  | 8   | 14  | -0.30  |
| 170932556 | Oxnad1        | oxidoreductase NAD-binding domain-containing protein 1 precursor       | 1   | 1   | 1   | 3   | -0.05  |  |  | 0   | 0  | 0   | 0   |        |
| 110625616 | Nr1h3         | oxysterols receptor LXR-alpha                                          | 0   | 1   | 0   | 1   | -0.70# |  |  | 0   | 0  | 0   | 0   |        |
| 145046259 | Pak1ip1       | p21-activated protein kinase-interacting protein 1                     | 26  | 25  | 16  | 67  | 0.04   |  |  | 0   | 10 | 18  | 28  | 0.16   |
| 226958577 | 2610301G19Rik | p30 DBC protein                                                        | 77  | 94  | 89  | 260 | 0.23   |  |  | 14  | 59 | 59  | 132 | 0.10   |
| 11528520  | Perp          | p53 apoptosis effector related to PMP-22                               | 0   | 0   | 0   | 0   |        |  |  | 0   | 0  | 1   | 1   | 1.95#  |
| 160333357 | Sin3a         | paired amphipathic helix protein Sin3a isoform 1                       | 47  | 62  | 53  | 162 | 0.22*  |  |  | 2   | 11 | 2   | 15  | 0.23   |
| 164420770 | Sin3b         | paired amphipathic helix protein Sin3b isoform 1                       | 7   | 7   | 12  | 26  | 0.03   |  |  | 0   | 1  | 0   | 1   | 0.17   |
| 164420772 | Sin3b         | paired amphipathic helix protein Sin3b isoform 2                       | 0   | 0   | 0   | 0   |        |  |  | 0   | 0  | 1   | 1   | -0.07  |
| 153945775 | Pax2          | paired box protein Pax-2                                               | 23  | 35  | 23  | 81  | 0.04   |  |  | 1   | 10 | 7   | 18  | -0.02  |
| 6754990   | Pax8          | paired box protein Pax-8                                               | 43  | 74  | 38  | 155 | -0.20  |  |  | 8   | 11 | 12  | 31  | 0.31*  |
| 9790039   | Pldn          | pallidin                                                               | 1   | 1   | 2   | 4   | -0.19  |  |  | 0   | 0  | 0   | 0   |        |
| 121674797 | Ppt1          | palmitoyl-protein thioesterase 1 precursor                             | 3   | 2   | 6   | 11  | 0.03   |  |  | 0   | 0  | 0   | 0   |        |
| 256818788 | Papd5         | PAP-associated domain-containing protein 5 isoform b                   | 0   | 0   | 0   | 0   |        |  |  | 0   | 0  | 2   | 2   | -0.04  |
| 15809012  | Prcc          | papillary renal cell carcinoma translocation-associated gene product   | 5   | 10  | 9   | 24  | 0.33   |  |  | 0   | 0  | 0   | 0   |        |
| 22122445  | Cdc73         | parafibromin                                                           | 20  | 40  | 23  | 83  | 0.00   |  |  | 3   | 14 | 9   | 26  | 0.17*  |
| 225543409 | Pspc1         | paraspeckle component 1                                                | 82  | 84  | 57  | 223 | 0.00   |  |  | 85  | 68 | 62  | 215 | -0.05  |
| 62460366  | Ptms          | parathyrosin                                                           | 0   | 1   | 0   | 1   | 0.15   |  |  | 0   | 0  | 0   | 0   |        |
| 157841170 | Pddc1         | Parkinson disease 7 domain-containing protein 1 precursor              | 9   | 6   | 6   | 21  | 0.28   |  |  | 0   | 1  | 0   | 1   | 0.28   |
| 283945600 | Wibg          | partner of Y14 and mago isoform 2                                      | 4   | 3   | 2   | 9   | 0.16   |  |  | 0   | 0  | 0   | 0   |        |
| 42734451  | Paxip1        | PAX-interacting protein 1                                              | 2   | 3   | 4   | 9   | 0.45   |  |  | 0   | 0  | 0   | 0   |        |
| 19527168  | Psip1         | PC4 and SFRS1-interacting protein                                      | 115 | 145 | 110 | 370 | -0.16* |  |  | 76  | 95 | 113 | 284 | -0.15  |
| 119372296 | Pcid2         | PCI domain-containing protein 2                                        | 16  | 20  | 8   | 44  | 0.05   |  |  | 2   | 8  | 4   | 14  | -0.30  |
| 71773932  | 2810417H13Rik | PCNA-associated factor                                                 | 6   | 5   | 1   | 12  | -0.14  |  |  | 0   | 0  | 0   | 0   |        |
| 82881784  | Gm15428       | PCNA-associated factor isoform 1                                       | 3   | 4   | 0   | 7   | -0.05  |  |  | 0   | 0  | 0   | 0   |        |
| 22122423  | Pdlim2        | PDZ and LIM domain protein 2                                           | 6   | 5   | 5   | 16  | 0.58#  |  |  | 0   | 1  | 1   | 2   | 1.36#  |
| 166197681 | Pdlim7        | PDZ and LIM domain protein 7 isoform a                                 | 0   | 3   | 0   | 3   | -0.09  |  |  | 0   | 0  | 0   | 0   |        |
| 124053449 | Intu          | PDZ domain containing 6                                                | 0   | 0   | 0   | 0   |        |  |  | 1   | 0  | 0   | 1   | -1.02# |
| 21312244  | Pdzd11        | PDZ domain-containing protein 11                                       | 3   | 6   | 2   | 11  | 0.66*# |  |  | 1   | 0  | 1   | 2   | 0.84#  |
| 9055336   | Gipc1         | PDZ domain-containing protein GIPC1                                    | 0   | 8   | 6   | 14  | -0.14  |  |  | 0   | 1  | 0   | 1   | 2.41#  |
| 8394258   | Gipc2         | PDZ domain-containing protein GIPC2                                    | 25  | 27  | 14  | 66  | 0.12   |  |  | 0   | 7  | 7   | 14  | 0.05   |
| 33469980  | Ptcd3         | pentatricopeptide repeat-containing protein 3, mitochondrial precursor | 0   | 0   | 1   | 1   | 0.24   |  |  | 0   | 0  | 0   | 0   |        |
| 30425080  | Mtrf1l        | peptide chain release factor 1-like, mitochondrial precursor           | 0   | 0   | 1   | 1   | -0.08  |  |  | 0   | 0  | 0   | 0   |        |
| 255003823 | Pdf           | peptide deformylase-like protein                                       | 0   | 1   | 0   | 1   | 2.72#  |  |  | 0   | 0  | 3   | 3   | -0.01  |
| 85702071  | Pin1-ps1      | peptidylprolyl cis/trans isomerase, NIMA-interacting 1, pseudogene 1   | 0   | 0   | 0   | 0   |        |  |  | 0   | 0  | 1   | 1   | -0.04  |
| 6679439   | Ppia          | peptidyl-prolyl cis-trans isomerase A                                  | 70  | 88  | 68  | 226 | 0.03   |  |  | 121 | 81 | 60  | 262 | -0.03  |

|           |          |                                                                    |     |     |     |     |        |  |    |    |    |     |        |
|-----------|----------|--------------------------------------------------------------------|-----|-----|-----|-----|--------|--|----|----|----|-----|--------|
| 71774133  | Ppib     | peptidyl-prolyl cis-trans isomerase B precursor                    | 77  | 80  | 55  | 212 | -0.05  |  | 79 | 51 | 39 | 169 | 0.04   |
| 110625681 | Cwc27    | peptidyl-prolyl cis-trans isomerase CWC27 homolog                  | 2   | 3   | 1   | 6   | 1.65#  |  | 0  | 1  | 0  | 1   | -0.31  |
| 13385854  | Ppid     | peptidyl-prolyl cis-trans isomerase D                              | 0   | 0   | 2   | 2   | -0.36  |  | 0  | 1  | 4  | 5   | -0.19  |
| 14196340  | Ppie     | peptidyl-prolyl cis-trans isomerase E                              | 8   | 6   | 12  | 26  | 0.16   |  | 10 | 14 | 17 | 41  | 0.16   |
| 19527310  | Ppif     | peptidyl-prolyl cis-trans isomerase F, mitochondrial precursor     | 15  | 24  | 15  | 54  | -0.07  |  | 0  | 9  | 3  | 12  | 0.02   |
| 6679803   | Fkbp1a   | peptidyl-prolyl cis-trans isomerase FKBP1A                         | 1   | 0   | 0   | 1   | 1.98#  |  | 0  | 0  | 2  | 2   | 0.81#  |
| 6679805   | Fkbp2    | peptidyl-prolyl cis-trans isomerase FKBP2 precursor                | 24  | 19  | 14  | 57  | -0.01  |  | 0  | 4  | 3  | 7   | 0.03   |
| 7305061   | Fkbp3    | peptidyl-prolyl cis-trans isomerase FKBP3                          | 24  | 23  | 17  | 64  | 0.01   |  | 0  | 1  | 3  | 4   | 0.57#  |
| 6753882   | Fkbp4    | peptidyl-prolyl cis-trans isomerase FKBP4                          | 6   | 2   | 10  | 18  | 0.10   |  | 0  | 1  | 1  | 2   | -0.02  |
| 6753884   | Fkbp5    | peptidyl-prolyl cis-trans isomerase FKBP5                          | 0   | 1   | 3   | 4   | 0.08   |  | 0  | 10 | 16 | 26  | -0.23  |
| 161484656 | Fkbp8    | peptidyl-prolyl cis-trans isomerase FKBP8 isoform b                | 1   | 0   | 6   | 7   | -0.36  |  | 4  | 4  | 7  | 15  | -0.05  |
| 124487333 | Ppig     | peptidyl-prolyl cis-trans isomerase G                              | 1   | 28  | 10  | 39  | 0.08   |  | 1  | 32 | 33 | 66  | 0.04   |
| 21312022  | Ppih     | peptidyl-prolyl cis-trans isomerase H isoform 1                    | 28  | 45  | 24  | 97  | 0.03   |  | 3  | 18 | 6  | 27  | 0.24   |
| 12963653  | Pin1     | peptidyl-prolyl cis-trans isomerase NIMA-interacting 1             | 8   | 18  | 6   | 32  | -0.01  |  | 0  | 3  | 0  | 3   | 0.12   |
| 82905251  | Gm6851   | peptidyl-prolyl cis-trans isomerase NIMA-interacting 4-like        | 11  | 9   | 10  | 30  | 0.06   |  | 0  | 0  | 0  | 0   |        |
| 21312784  | Ppil1    | peptidyl-prolyl cis-trans isomerase-like 1                         | 11  | 16  | 13  | 40  | -0.01  |  | 27 | 10 | 8  | 45  | 0.05   |
| 30025020  | Ppil2    | peptidyl-prolyl cis-trans isomerase-like 2                         | 8   | 11  | 4   | 23  | 0.05   |  | 0  | 6  | 10 | 16  | 0.50#  |
| 21746159  | Ppil3    | peptidyl-prolyl cis-trans isomerase-like 3 isoform 1               | 7   | 13  | 0   | 20  | 0.07   |  | 1  | 0  | 0  | 1   | -0.09  |
| 169790966 | Ppil3    | peptidyl-prolyl cis-trans isomerase-like 3 isoform 2               | 0   | 0   | 6   | 6   | -0.42  |  | 0  | 0  | 0  | 0   |        |
| 165972339 | Ppil4    | peptidyl-prolyl cis-trans isomerase-like 4                         | 2   | 5   | 1   | 8   | 0.02   |  | 0  | 1  | 0  | 1   | 0.21   |
| 255683299 | Ppwd1    | peptidylprolyl isomerase domain and WD repeat-containing protein 1 | 23  | 29  | 20  | 72  | 0.15   |  | 0  | 11 | 3  | 14  | 0.08   |
| 149363634 | Ptrh2    | peptidyl-tRNA hydrolase 2, mitochondrial isoform b                 | 8   | 10  | 8   | 26  | -0.17  |  | 4  | 2  | 1  | 7   | -0.26  |
| 19387848  | Ict1     | peptidyl-tRNA hydrolase ICT1, mitochondrial                        | 2   | 5   | 2   | 9   | -0.08  |  | 0  | 0  | 0  | 0   |        |
| 30794210  | Brpf1    | peregrin                                                           | 0   | 0   | 0   | 0   |        |  | 0  | 4  | 4  | 8   | 0.03   |
| 93004085  | Pcnt     | pericentrin                                                        | 0   | 0   | 0   | 0   |        |  | 0  | 0  | 1  | 1   | -0.43  |
| 13385312  | Plin3    | perilipin-3                                                        | 0   | 0   | 0   | 0   |        |  | 0  | 0  | 1  | 1   | 0.07   |
| 284005509 | Pwp1     | periodic tryptophan protein 1 homolog                              | 0   | 0   | 0   | 0   |        |  | 0  | 8  | 4  | 12  | 0.13   |
| 30102930  | Pwp2     | periodic tryptophan protein 2 homolog                              | 1   | 7   | 8   | 16  | -0.15  |  | 22 | 81 | 82 | 185 | 0.09   |
| 158749615 | BC016423 | peripheral benzodiazepine receptor associated protein              | 0   | 0   | 0   | 0   |        |  | 0  | 0  | 2  | 2   | 0.35   |
| 133779004 | Pphln1   | periphilin-1 isoform 3                                             | 0   | 0   | 0   | 0   |        |  | 0  | 0  | 1  | 1   | 1.03#  |
| 112421039 | Ppl      | periplakin                                                         | 219 | 287 | 234 | 740 | 0.76*# |  | 21 | 63 | 46 | 130 | 0.55#  |
| 268370173 | Pxdn     | peroxidasin homolog precursor                                      | 1   | 0   | 0   | 1   | -0.85# |  | 0  | 0  | 1  | 1   | -1.20# |
| 6754976   | Prdx1    | peroxiredoxin-1                                                    | 13  | 23  | 18  | 54  | 0.08   |  | 3  | 21 | 12 | 36  | 0.12   |
| 148747558 | Prdx2    | peroxiredoxin-2                                                    | 6   | 10  | 8   | 24  | 0.05   |  | 0  | 5  | 10 | 15  | 0.11   |
| 7948999   | Prdx4    | peroxiredoxin-4                                                    | 9   | 5   | 1   | 15  | -0.18  |  | 2  | 2  | 1  | 5   | 0.05   |
| 6755114   | Prdx5    | peroxiredoxin-5, mitochondrial precursor                           | 30  | 19  | 25  | 74  | -0.12  |  | 48 | 13 | 36 | 97  | -0.29* |
| 6671549   | Prdx6    | peroxiredoxin-6                                                    | 3   | 3   | 1   | 7   | 0.22   |  | 0  | 0  | 0  | 0   |        |
| 6753622   | Decr2    | peroxisomal 2,4-dienoyl-CoA reductase                              | 22  | 21  | 13  | 56  | -0.02  |  | 1  | 6  | 9  | 16  | 0.08   |
| 160333195 | Eci2     | peroxisomal 3,2-trans-enoyl-CoA isomerase isoform b                | 9   | 3   | 4   | 16  | -0.16  |  | 0  | 0  | 0  | 0   |        |
| 66793429  | Acox1    | peroxisomal acyl-coenzyme A oxidase 1                              | 29  | 22  | 29  | 80  | -0.12  |  | 0  | 2  | 7  | 9   | -0.35  |
| 31541815  | Ehhadh   | peroxisomal bifunctional enzyme                                    | 0   | 1   | 2   | 3   | -0.03  |  | 0  | 0  | 0  | 0   |        |
| 17157983  | Crot     | peroxisomal carnitine O-octanoyltransferase                        | 2   | 0   | 0   | 2   | 0.11   |  | 0  | 0  | 1  | 1   | 0.57#  |



|           |              |                                                                                |    |    |    |     |        |     |     |     |     |        |
|-----------|--------------|--------------------------------------------------------------------------------|----|----|----|-----|--------|-----|-----|-----|-----|--------|
| 254675122 | Tysnd1       | peroxisomal leader peptide-processing protease                                 | 0  | 1  | 0  | 1   | -0.40  | 0   | 0   | 0   | 0   |        |
| 241666485 | Pex11b       | peroxisomal membrane protein 11B isoform 2                                     | 4  | 2  | 1  | 7   | -0.28  | 0   | 4   | 3   | 7   | -0.38  |
| 21735445  | Pex11c       | peroxisomal membrane protein 11C                                               | 1  | 0  | 0  | 1   | 0.11   | 0   | 0   | 0   | 0   |        |
| 29789024  | Slc25a17     | peroxisomal membrane protein PMP34                                             | 5  | 2  | 0  | 7   | -0.02  | 0   | 2   | 1   | 3   | -0.22  |
| 31982273  | Hsd17b4      | peroxisomal multifunctional enzyme type 2                                      | 73 | 84 | 91 | 248 | 0.03   | 2   | 10  | 34  | 46  | -0.03  |
| 159032016 | Gigyf2       | PERQ amino acid-rich with GYF domain-containing protein 2 isoform b            | 0  | 0  | 0  | 0   |        | 0   | 5   | 5   | 10  | 0.10   |
| 12584984  | Pes1         | pescadillo homolog                                                             | 2  | 1  | 0  | 3   | 0.00   | 13  | 15  | 26  | 54  | -0.01  |
| 71480098  | Pcnp         | PEST proteolytic signal-containing nuclear protein                             | 21 | 22 | 24 | 67  | 0.03   | 0   | 5   | 5   | 10  | 0.39   |
| 255522851 | Phf10        | PHD finger protein 10                                                          | 10 | 20 | 14 | 44  | -0.10* | 0   | 8   | 2   | 10  | 0.01   |
| 198442868 | Phf12        | PHD finger protein 12                                                          | 1  | 6  | 0  | 7   | 0.17   | 0   | 0   | 1   | 1   | -0.25  |
| 270288742 | Phf14        | PHD finger protein 14 isoform 1                                                | 0  | 0  | 0  | 0   |        | 0   | 44  | 39  | 83  | 0.06   |
| 270288744 | Phf14        | PHD finger protein 14 isoform 2                                                | 1  | 6  | 4  | 11  | 0.24   | 3   | 3   | 2   | 8   | -0.02  |
| 31543476  | Phf2         | PHD finger protein 2                                                           | 4  | 3  | 0  | 7   | 0.33   | 0   | 3   | 9   | 12  | 0.19   |
| 124487309 | Phf3         | PHD finger protein 3                                                           | 1  | 10 | 7  | 18  | 0.23   | 0   | 0   | 0   | 0   |        |
| 33563292  | Phf6         | PHD finger protein 6                                                           | 15 | 12 | 14 | 41  | -0.13  | 0   | 2   | 3   | 5   | -0.12  |
| 24415990  | Phf5a        | PHD finger-like domain-containing protein 5A                                   | 8  | 10 | 10 | 28  | 0.02   | 27  | 14  | 8   | 49  | -0.04  |
| 162138894 | Farsa        | phenylalanyl-tRNA synthetase alpha chain                                       | 7  | 6  | 2  | 15  | -0.04  | 0   | 2   | 3   | 5   | -0.55# |
| 31981400  | Farsb        | phenylalanyl-tRNA synthetase beta chain                                        | 4  | 15 | 2  | 21  | -0.02  | 0   | 0   | 0   | 0   |        |
| 124487035 | Phip         | PH-interacting protein                                                         | 0  | 0  | 0  | 0   |        | 25  | 89  | 169 | 283 | 0.01   |
| 149258501 | LOC100046151 | phosphate carrier protein, mitochondrial-like                                  | 24 | 12 | 17 | 53  | -0.13  | 89  | 25  | 15  | 129 | -0.15  |
| 20149726  | Cds2         | phosphatidate cytidyltransferase 2                                             | 2  | 0  | 0  | 2   | -0.44  | 2   | 0   | 0   | 2   | -0.45  |
| 84794552  | Pebp1        | phosphatidylethanolamine-binding protein 1                                     | 7  | 7  | 4  | 18  | 0.22   | 1   | 2   | 5   | 8   | -0.10  |
| 13507622  | Sacm1l       | phosphatidylinositol phosphatase SAC1                                          | 9  | 0  | 1  | 10  | -0.05  | 1   | 0   | 1   | 2   | 0.01   |
| 241982771 | Pi4ka        | phosphatidylinositol 4-kinase type 3 alpha                                     | 0  | 0  | 1  | 1   | 0.64#  | 0   | 0   | 0   | 0   |        |
| 52630436  | Pigu         | phosphatidylinositol glycan anchor biosynthesis class U protein                | 4  | 1  | 2  | 7   | -0.43* | 1   | 2   | 4   | 7   | -0.29  |
| 41872422  | Pigh         | phosphatidylinositol N-acetylglucosaminyltransferase subunit H                 | 1  | 2  | 0  | 3   | -0.32  | 0   | 0   | 0   | 0   |        |
| 31981380  | Pigq         | phosphatidylinositol N-acetylglucosaminyltransferase subunit Q                 | 0  | 0  | 0  | 0   |        | 0   | 0   | 1   | 1   | -0.20  |
| 145279206 | Pik3c2a      | phosphatidylinositol-4-phosphate 3-kinase C2 domain-containing subunit alpha   | 0  | 1  | 1  | 2   | -0.18  | 3   | 0   | 0   | 3   | -7.35# |
| 17298686  | Pip4k2c      | phosphatidylinositol-5-phosphate 4-kinase type-2 gamma                         | 1  | 2  | 1  | 4   | 0.48   | 2   | 0   | 3   | 5   | -0.19  |
| 32567788  | Picalm       | phosphatidylinositol-binding clathrin assembly protein                         | 0  | 3  | 1  | 4   | 0.48   | 0   | 0   | 0   | 0   |        |
| 28077029  | Pck2         | phosphoenolpyruvate carboxykinase [GTP], mitochondrial                         | 4  | 2  | 2  | 8   | -0.19  | 0   | 6   | 11  | 17  | -0.40  |
| 227330633 | Pgm2         | phosphoglucomutase-1                                                           | 0  | 1  | 0  | 1   | -0.66# | 1   | 0   | 3   | 4   | 0.14   |
| 70778976  | Pgk1         | phosphoglycerate kinase 1                                                      | 23 | 17 | 32 | 72  | 0.02   | 55  | 62  | 128 | 245 | -0.15  |
| 114326546 | Pgam1        | phosphoglycerate mutase 1                                                      | 24 | 23 | 30 | 77  | -0.07  | 107 | 72  | 118 | 297 | -0.24  |
| 7242181   | Pld3         | phospholipase D3                                                               | 7  | 8  | 6  | 21  | -0.16  | 0   | 2   | 0   | 2   | 0.12   |
| 90903235  | Gpx4         | phospholipid hydroperoxide glutathione peroxidase, nuclear isoform 2 precursor | 10 | 11 | 6  | 27  | 0.23   | 1   | 2   | 2   | 5   | 0.23   |
| 31982115  | Plscr2       | phospholipid scramblase 2                                                      | 0  | 0  | 1  | 1   | 2.25#  | 0   | 0   | 0   | 0   |        |
| 254588058 | Pmvk         | phosphomevalonate kinase isoform 2                                             | 0  | 0  | 0  | 0   |        | 0   | 0   | 1   | 1   | -0.12  |
| 309266230 | LOC100047252 | phosphoserine aminotransferase-like isoform 2                                  | 4  | 0  | 2  | 6   | -0.23  | 2   | 19  | 41  | 62  | 0.15   |
| 18129616  | Pinx1        | PIN2/TERF1-interacting telomerase inhibitor 1                                  | 2  | 1  | 1  | 4   | -0.12  | 0   | 8   | 9   | 17  | -0.29  |
| 112420990 | Pnn          | pinin                                                                          | 3  | 11 | 5  | 19  | 0.15   | 105 | 131 | 148 | 384 | 0.04   |

|           |               |                                                                   |    |     |     |     |       |     |    |     |     |        |       |     |
|-----------|---------------|-------------------------------------------------------------------|----|-----|-----|-----|-------|-----|----|-----|-----|--------|-------|-----|
| 124286797 | 1600029D21Rik | placenta-expressed transcript 1 protein precursor                 | 3  | 3   | 6   | 12  | 0.36  | 16  | 17 | 23  | 56  | 0.59   | *,#   |     |
| 9790161   | Pkp1          | plakophilin-1                                                     | 0  | 0   | 0   | 0   |       | 0   | 0  | 1   | 1   | -10.24 | #     |     |
| 21312960  | Pkp2          | plakophilin-2                                                     | 15 | 13  | 17  | 45  | -0.18 | 24  | 46 | 53  | 123 | 0.99   | *,#   |     |
| 242332585 | Pkp3          | plakophilin-3 isoform 1                                           | 5  | 2   | 2   | 9   | -0.55 | 0   | 0  | 3   | 3   | 0.71   | #     |     |
| 147899467 | Pkp4          | plakophilin-4 isoform 2                                           | 0  | 0   | 0   | 0   |       | 0   | 1  | 3   | 4   | 0.77   | #     |     |
| 269784615 | Atp2b4        | plasma membrane calcium ATPase 4 isoform x/b                      | 0  | 0   | 0   | 0   |       | 0   | 0  | 2   | 2   | 0.17   |       |     |
| 165932381 | Serbp1        | plasminogen activator inhibitor 1 RNA-binding protein isoform 4   | 67 | 41  | 50  | 158 | -0.10 | 21  | 20 | 35  | 76  | 0.05   |       |     |
| 85986577  | Pls1          | plastin-1                                                         | 4  | 4   | 4   | 12  | 0.13  | 0   | 0  | 0   | 0   |        |       |     |
| 262050551 | Pls3          | plastin-3                                                         | 13 | 13  | 7   | 33  | 0.00  | 0   | 3  | 1   | 4   | 0.34   |       |     |
| 7305363   | Pafah1b1      | platelet-activating factor acetylhydrolase IB subunit alpha       | 3  | 4   | 6   | 13  | 0.16  | 0   | 0  | 0   | 0   |        |       |     |
| 40254624  | Pafah1b2      | platelet-activating factor acetylhydrolase IB subunit beta        | 0  | 0   | 0   | 0   |       | 0   | 1  | 1   | 2   | 0.50   | #     |     |
| 6679201   | Pafah1b3      | platelet-activating factor acetylhydrolase IB subunit gamma       | 2  | 0   | 0   | 2   | -0.05 | 0   | 6  | 3   | 9   | -0.13  |       |     |
| 237681204 | Plekha6       | pleckstrin homology domain-containing family A member 6 isoform 2 | 0  | 8   | 3   | 11  | -0.20 | 0   | 1  | 2   | 3   | -0.18  |       |     |
| 254675265 | Plec          | pectin isoform 1a                                                 | 0  | 348 | 0   | 348 | 0.50  | 0   | 0  | 0   | 0   |        |       |     |
| 254675251 | Plec          | pectin isoform 1d                                                 | 97 | 0   | 0   | 97  | 0.61  | #   | 99 | 125 | 194 | 418    | 0.63  | *,# |
| 256000745 | Plec          | pectin isoform 1hij                                               | 15 | 21  | 181 | 217 | 0.03  | 0   | 60 | 130 | 190 | 0.45   |       |     |
| 31980791  | Plrg1         | pleiotropic regulator 1                                           | 40 | 53  | 43  | 136 | 0.11  | 12  | 35 | 22  | 69  | 0.02   |       |     |
| 226958474 | Plxnb2        | plexin B2                                                         | 0  | 0   | 0   | 0   |       | 0   | 3  | 3   | 6   | -0.34  |       |     |
| 6679389   | Plxna1        | plexin-A1 precursor                                               | 0  | 0   | 0   | 0   |       | 4   | 0  | 0   | 4   | -0.05  |       |     |
| 260099684 | Pogz          | pogo transposable element with ZNF domain isoform 1               | 0  | 0   | 0   | 0   |       | 0   | 46 | 0   | 46  | 0.23   |       |     |
| 260099686 | Pogz          | pogo transposable element with ZNF domain isoform 2               | 9  | 5   | 5   | 19  | 0.32  | *   | 23 | 24  | 92  | 139    | 0.09  |     |
| 20806109  | Parp1         | poly [ADP-ribose] polymerase 1                                    | 31 | 42  | 41  | 114 | 0.08  | 2   | 23 | 17  | 42  | 0.12   |       |     |
| 166197700 | Parp14        | poly [ADP-ribose] polymerase 14                                   | 1  | 0   | 0   | 1   | 2.65  | #   | 0  | 0   | 0   | 0      |       |     |
| 6752992   | Parp2         | poly [ADP-ribose] polymerase 2                                    | 0  | 1   | 0   | 1   | -0.38 | 0   | 4  | 5   | 9   | -0.42  |       |     |
| 25014095  | Parp3         | poly [ADP-ribose] polymerase 3                                    | 6  | 5   | 1   | 12  | 0.12  | 0   | 0  | 0   | 0   |        |       |     |
| 112807189 | Parp6         | poly [ADP-ribose] polymerase 6 isoform 2                          | 0  | 0   | 0   | 0   |       | 0   | 1  | 0   | 1   | 1.90   | #     |     |
| 13384918  | Parp9         | poly [ADP-ribose] polymerase 9                                    | 0  | 2   | 0   | 2   | 0.19  | 0   | 0  | 0   | 0   |        |       |     |
| 21914853  | Papola        | poly(A) polymerase alpha                                          | 0  | 1   | 0   | 1   | 9.84  | #   | 0  | 0   | 0   | 0      |       |     |
| 19527122  | Papd4         | poly(A) RNA polymerase GLD2                                       | 0  | 0   | 0   | 0   |       | 0   | 0  | 1   | 1   | 0.21   |       |     |
| 21311877  | Parn          | poly(A)-specific ribonuclease PARN                                | 1  | 5   | 3   | 9   | 0.23  | 2   | 4  | 7   | 13  | -0.35  |       |     |
| 6754994   | Pcbp1         | poly(rC)-binding protein 1                                        | 82 | 107 | 85  | 274 | 0.06  | 109 | 75 | 121 | 305 | 0.17   |       |     |
| 157041229 | Pcbp2         | poly(rC)-binding protein 2 isoform 1                              | 0  | 89  | 0   | 89  | -0.02 | 0   | 0  | 0   | 0   |        |       |     |
| 157042772 | Pcbp2         | poly(rC)-binding protein 2 isoform 3                              | 80 | 0   | 65  | 145 | -0.04 | 114 | 54 | 59  | 227 | 0.07   |       |     |
| 291327528 | Pcbp2         | poly(rC)-binding protein 2 isoform 4                              | 0  | 0   | 1   | 1   | 0.51  | 0   | 43 | 76  | 119 | 0.02   |       |     |
| 257196183 | Puf60         | poly(U)-binding-splicing factor PUF60 isoform a                   | 0  | 15  | 0   | 15  | 0.05  | 0   | 0  | 0   | 0   |        |       |     |
| 257196186 | Puf60         | poly(U)-binding-splicing factor PUF60 isoform c                   | 83 | 111 | 79  | 273 | 0.00  | 43  | 77 | 39  | 159 | 0.13   |       |     |
| 31560656  | Pabpc1        | polyadenylate-binding protein 1                                   | 0  | 0   | 4   | 4   | -1.42 | #   | 0  | 8   | 5   | 13     | -0.27 |     |
| 9506945   | Pabpn1        | polyadenylate-binding protein 2                                   | 7  | 17  | 19  | 43  | 0.14  | 9   | 31 | 11  | 51  | 0.19   |       |     |
| 309267080 | LOC100503296  | polyadenylate-binding protein 4-like, partial                     | 0  | 2   | 0   | 2   | -0.26 | 0   | 0  | 3   | 3   | -0.09  |       |     |
| 13385420  | Pmf1          | polyamine-modulated factor 1                                      | 9  | 4   | 4   | 17  | -0.11 | 0   | 9  | 2   | 11  | 0.14   |       |     |
| 46559391  | Bmi1          | polycomb complex protein BMI-1                                    | 1  | 0   | 0   | 1   | -0.07 | 0   | 0  | 0   | 0   |        |       |     |
| 37574111  | Pcgf1         | polycomb group RING finger protein 1                              | 0  | 1   | 0   | 1   | -0.18 | 0   | 0  | 0   | 0   |        |       |     |
| 254028183 | Pcgf2         | polycomb group RING finger protein 2                              | 1  | 1   | 0   | 2   | 0.13  | 0   | 0  | 0   | 0   |        |       |     |
| 21313116  | Pcgf5         | polycomb group RING finger protein 5                              | 0  | 2   | 1   | 3   | 0.33  | 0   | 0  | 0   | 0   |        |       |     |
| 11230770  | Eed           | polycomb protein EED                                              | 9  | 9   | 4   | 22  | 0.09  | 0   | 3  | 5   | 8   | 0.06   |       |     |
| 253314523 | Suz12         | polycomb protein Suz12 isoform 2                                  | 7  | 10  | 2   | 19  | 0.06  | 2   | 10 | 12  | 24  | -0.03  |       |     |
| 31980927  | Pqbp1         | polyglutamine-binding protein 1                                   | 5  | 9   | 6   | 20  | 0.07  | 2   | 0  | 5   | 7   | 0.16   |       |     |

|           |               |                                                                      |     |     |     |      |         |     |     |     |      |      |        |
|-----------|---------------|----------------------------------------------------------------------|-----|-----|-----|------|---------|-----|-----|-----|------|------|--------|
| 309266798 | LOC631302     | polyglutamine-binding protein 1-like                                 | 0   | 0   | 0   | 0    |         |     | 0   | 2   | 0    | 2    | 0.29   |
| 304434574 | Phc2          | polyhomeotic-like protein 2 isoform B                                | 2   | 3   | 0   | 5    | 0.17    |     | 0   | 1   | 0    | 1    | -0.08  |
| 14780884  | Poldip2       | polymerase delta-interacting protein 2                               | 0   | 1   | 2   | 3    | -0.19 * |     | 0   | 1   | 1    | 2    | -0.28  |
| 30519969  | Poldip3       | polymerase delta-interacting protein 3                               | 83  | 92  | 54  | 229  | 0.03    |     | 4   | 18  | 25   | 47   | 0.19   |
| 6679567   | Ptrf          | polymerase I and transcript release factor                           | 1   | 3   | 9   | 13   | 0.18    |     | 0   | 4   | 6    | 10   | -0.17  |
| 227430356 | Nol9          | polynucleotide 5'-hydroxyl-kinase NOL9 isoform 2                     | 8   | 13  | 10  | 31   | 0.27 *  |     | 0   | 3   | 4    | 7    | 0.24   |
| 46877109  | Galnt2        | polypeptide N-acetylgalactosaminyltransferase 2                      | 0   | 0   | 0   | 0    |         |     | 0   | 0   | 1    | 1    | -0.44  |
| 162951828 | Galnt3        | polypeptide N-acetylgalactosaminyltransferase 3                      | 4   | 0   | 2   | 6    | -0.19   |     | 1   | 0   | 3    | 4    | -0.28  |
| 116517303 | Ptbp1         | polypyrimidine tract-binding protein 1 isoform 2                     | 279 | 244 | 223 | 746  | -0.02   |     | 332 | 300 | 282  | 914  | -0.04  |
| 9507003   | Ptbp2         | polypyrimidine tract-binding protein 2                               | 28  | 29  | 25  | 82   | 0.05    |     | 7   | 14  | 3    | 24   | -0.01  |
| 25188204  | Pnpt1         | polyribonucleotide nucleotidyltransferase 1, mitochondrial precursor | 5   | 9   | 5   | 19   | -0.31   |     | 0   | 0   | 0    | 0    |        |
| 6755919   | Ubb           | polyubiquitin-B                                                      | 20  | 5   | 16  | 41   | 0.02    |     | 0   | 63  | 59   | 122  | -0.13  |
| 229577268 | Kctd18        | potassium channel tetramerization domain containing 18 isoform 2     | 0   | 1   | 0   | 1    | 0.16    |     | 0   | 0   | 0    | 0    |        |
| 114431256 | Pou2f1        | POU domain, class 2, transcription factor 1 isoform L                | 0   | 3   | 0   | 3    | 0.47    |     | 0   | 0   | 0    | 0    |        |
| 20070422  | Praf2         | PRA1 family protein 2                                                | 2   | 0   | 0   | 2    | -0.40   |     | 0   | 0   | 0    | 0    |        |
| 14149750  | Arl6ip5       | PRA1 family protein 3                                                | 12  | 5   | 7   | 24   | -0.21   |     | 0   | 1   | 0    | 1    | -0.15  |
| 7110681   | Pbx1          | pre-B-cell leukemia transcription factor 1 isoform b                 | 7   | 10  | 9   | 26   | 0.13    |     | 0   | 1   | 0    | 1    | -0.11  |
| 8567384   | Pbx2          | pre-B-cell leukemia transcription factor 2                           | 2   | 3   | 3   | 8    | 0.10    |     | 0   | 0   | 0    | 0    |        |
| 7949105   | Pbx3          | pre-B-cell leukemia transcription factor 3                           | 2   | 5   | 0   | 7    | 0.23    |     | 0   | 0   | 0    | 0    |        |
| 154759295 | Gm15450       | predicted gene 15450                                                 | 9   | 4   | 3   | 16   | -0.17   |     | 19  | 4   | 10   | 33   | -0.05  |
| 260304980 | Gm5803        | predicted gene 5803                                                  | 0   | 66  | 0   | 66   | -0.04   |     | 0   | 28  | 0    | 28   | -0.08  |
| 309263447 | Gm6747        | predicted gene 6747 isoform 1                                        | 28  | 28  | 19  | 75   | 0.00    |     | 0   | 0   | 0    | 0    |        |
| 309263449 | Gm6747        | predicted gene 6747 isoform 2                                        | 0   | 0   | 0   | 0    |         |     | 0   | 6   | 5    | 11   | 0.07   |
| 218505708 | Gm8994        | predicted gene, EG668137                                             | 0   | 0   | 0   | 0    |         |     | 60  | 10  | 0    | 70   | -0.01  |
| 298231238 | Gm9846        | predicted gene, ENSMUSG00000050621                                   | 10  | 8   | 4   | 22   | -0.02   |     | 13  | 0   | 14   | 27   | 0.01   |
| 215490077 | Gm10094       | predicted gene, ENSMUSG00000061104                                   | 29  | 36  | 26  | 91   | 0.09    |     | 83  | 41  | 21   | 145  | 0.00   |
| 31981577  | Pfdn2         | prefoldin subunit 2                                                  | 1   | 0   | 3   | 4    | 0.37    |     | 0   | 0   | 0    | 0    |        |
| 55741463  | Pfdn5         | prefoldin subunit 5                                                  | 1   | 0   | 0   | 1    | 0.50    |     | 0   | 0   | 0    | 0    |        |
| 162287370 | Lmna          | prelamin-A/C isoform A                                               | 308 | 499 | 405 | 1212 | -0.21   | ### | ### | ### | 4038 |      | -0.06  |
| 149254324 | LOC100046650  | PRELI domain-containing protein 1, mitochondrial-like                | 0   | 2   | 0   | 2    | -0.34   |     | 0   | 0   | 0    | 0    |        |
| 227330595 | Fip11         | pre-mRNA 3'-end-processing factor FIP1 isoform 1                     | 22  | 0   | 0   | 22   | 0.22    |     | 0   | 0   | 0    | 0    |        |
| 227330598 | Fip11         | pre-mRNA 3'-end-processing factor FIP1 isoform 3                     | 0   | 42  | 24  | 66   | 0.11    |     | 3   | 11  | 6    | 20   | 0.18   |
| 13384692  | 0610009D07Rik | pre-mRNA branch site protein p14                                     | 19  | 17  | 13  | 49   | -0.01   |     | 48  | 14  | 16   | 78   | 0.06   |
| 268370153 | Pcf11         | pre-mRNA cleavage complex II protein Pcf11                           | 0   | 2   | 0   | 2    | 0.68 #  |     | 0   | 0   | 0    | 0    |        |
| 198278501 | Cdc40         | pre-mRNA-processing factor 17                                        | 0   | 0   | 0   | 0    |         |     | 0   | 9   | 3    | 12   | 0.10   |
| 19527358  | Prpf19        | pre-mRNA-processing factor 19                                        | 54  | 47  | 43  | 144  | 0.08    |     | 109 | 100 | 76   | 285  | 0.12   |
| 9055218   | Prpf40a       | pre-mRNA-processing factor 40 homolog A                              | 71  | 85  | 77  | 233  | 0.02    |     | 80  | 80  | 76   | 236  | 0.03   |
| 21539655  | Prpf6         | pre-mRNA-processing factor 6                                         | 36  | 41  | 43  | 120  | 0.00    |     | 5   | 76  | 49   | 130  | -0.02  |
| 115583687 | Prpf8         | pre-mRNA-processing-splicing factor 8                                | 230 | 297 | 264 | 791  | -0.02   |     | 246 | 627 | 740  | 1613 | 0.01   |
| 40254503  | Prpf18        | pre-mRNA-splicing factor 18                                          | 2   | 6   | 4   | 12   | 0.61 #  |     | 0   | 1   | 0    | 1    | -0.32  |
| 227497256 | Prpf38a       | pre-mRNA-splicing factor 38A                                         | 5   | 21  | 10  | 36   | 0.00    |     | 6   | 16  | 19   | 41   | -0.08  |
| 30794464  | Prpf38b       | pre-mRNA-splicing factor 38B                                         | 23  | 63  | 30  | 116  | -0.05   |     | 3   | 11  | 13   | 27   | -0.19  |
| 30410010  | Dhx38         | pre-mRNA-splicing factor ATP-dependent RNA helicase PRP16            | 13  | 19  | 14  | 46   | 0.43 *  |     | 0   | 8   | 4    | 12   | 0.16   |
| 20149316  | Isy1          | pre-mRNA-splicing factor ISY1 homolog                                | 7   | 9   | 10  | 26   | 0.07    |     | 16  | 11  | 14   | 41   | 0.17 * |
| 110625591 | Rbm22         | pre-mRNA-splicing factor RBM22                                       | 3   | 9   | 11  | 23   | 0.22    |     | 10  | 32  | 15   | 57   | 0.09   |

|           |               |                                                                     |     |     |    |     |         |     |     |     |     |       |   |
|-----------|---------------|---------------------------------------------------------------------|-----|-----|----|-----|---------|-----|-----|-----|-----|-------|---|
| 39812173  | Slu7          | pre-mRNA-splicing factor SLU7                                       | 0   | 1   | 0  | 1   | 0.43    | 0   | 2   | 1   | 3   | 1.52  | # |
| 70906453  | Bcas2         | pre-mRNA-splicing factor SPF27                                      | 44  | 49  | 36 | 129 | 0.04    | 4   | 20  | 9   | 33  | 0.00  |   |
| 13385660  | Xab2          | pre-mRNA-splicing factor SYF1                                       | 0   | 3   | 8  | 11  | 0.10*   | 9   | 55  | 64  | 128 | 0.10  |   |
| 21312064  | Syf2          | pre-mRNA-splicing factor SYF2                                       | 1   | 4   | 0  | 5   | 0.60#   | 0   | 5   | 1   | 6   | 0.23  |   |
| 165377291 | Wtap          | pre-mRNA-splicing regulator WTAP isoform a                          | 13  | 13  | 16 | 42  | 0.27    | 0   | 2   | 0   | 2   | 0.48  | # |
| 33946271  | Wtap          | pre-mRNA-splicing regulator WTAP isoform b                          | 0   | 0   | 0  | 0   |         | 0   | 0   | 1   | 1   | 0.78  | # |
| 13385294  | Pcyox1        | prenylcysteine oxidase precursor                                    | 18  | 0   | 2  | 20  | -0.14   | 0   | 0   | 2   | 2   | -0.11 |   |
| 27370248  | Pcyox1l       | prenylcysteine oxidase-like precursor                               | 1   | 0   | 0  | 1   | -0.25   | 0   | 0   | 0   | 0   |       |   |
| 21699068  | Pitrm1        | presequence protease, mitochondrial precursor                       | 6   | 3   | 18 | 27  | -0.23   | 0   | 1   | 2   | 3   | 0.04  |   |
| 87196490  | Pawr          | PRKC apoptosis WT1 regulator protein                                | 5   | 8   | 7  | 20  | 0.11    | 0   | 0   | 0   | 0   |       |   |
| 13385244  | Prkrip1       | PRKR-interacting protein 1                                          | 1   | 0   | 0  | 1   | -10.10# | 0   | 0   | 0   | 0   |       |   |
| 13385656  | Hoga1         | probable 4-hydroxy-2-oxoglutarate aldolase, mitochondrial precursor | 3   | 0   | 0  | 3   | -0.46   | 0   | 0   | 0   | 0   |       |   |
| 31044423  | Alkbh5        | probable alpha-ketoglutarate-dependent dioxygenase ABH5             | 11  | 14  | 14 | 39  | -0.11   | 0   | 4   | 3   | 7   | 0.31  |   |
| 240120047 | Rars2         | probable arginyl-tRNA synthetase, mitochondrial precursor           | 1   | 1   | 0  | 2   | 0.32    | 0   | 1   | 0   | 1   | 0.21  |   |
| 189491668 | Ddx10         | probable ATP-dependent RNA helicase DDX10                           | 0   | 2   | 0  | 2   | 0.14    | 0   | 29  | 15  | 44  | 0.23  |   |
| 40068489  | Ddx17         | probable ATP-dependent RNA helicase DDX17 isoform 3                 | 3   | 0   | 0  | 3   | 0.03    | 0   | 0   | 0   | 0   |       |   |
| 93587673  | Ddx17         | probable ATP-dependent RNA helicase DDX17 isoform 4                 | 102 | 112 | 72 | 286 | -0.02   | 180 | 165 | 277 | 622 | 0.00  |   |
| 124430514 | Ddx23         | probable ATP-dependent RNA helicase DDX23                           | 20  | 32  | 27 | 79  | -0.13   | 1   | 17  | 11  | 29  | -0.12 |   |
| 124249330 | Ddx27         | probable ATP-dependent RNA helicase DDX27                           | 0   | 0   | 0  | 0   |         | 3   | 31  | 38  | 72  | 0.02  |   |
| 270047502 | Ddx41         | probable ATP-dependent RNA helicase DDX41                           | 2   | 3   | 0  | 5   | 0.89#   | 0   | 3   | 2   | 5   | 0.22  |   |
| 160420299 | Ddx46         | probable ATP-dependent RNA helicase DDX46                           | 32  | 53  | 43 | 128 | 0.07    | 2   | 11  | 26  | 39  | -0.04 |   |
| 27229058  | Ddx47         | probable ATP-dependent RNA helicase DDX47                           | 21  | 24  | 23 | 68  | -0.07   | 8   | 18  | 26  | 52  | -0.01 |   |
| 67972435  | Ddx49         | probable ATP-dependent RNA helicase DDX49                           | 4   | 7   | 6  | 17  | 0.01    | 0   | 5   | 4   | 9   | 0.07  |   |
| 83816893  | Ddx5          | probable ATP-dependent RNA helicase DDX5                            | 77  | 92  | 62 | 231 | -0.06   | 161 | 178 | 285 | 624 | 0.05  |   |
| 256985213 | Ddx52         | probable ATP-dependent RNA helicase DDX52                           | 7   | 15  | 2  | 24  | 0.10    | 5   | 17  | 6   | 28  | -0.07 |   |
| 21312650  | Ddx56         | probable ATP-dependent RNA helicase DDX56                           | 0   | 0   | 0  | 0   |         | 11  | 25  | 27  | 63  | 0.28  |   |
| 6681159   | Ddx6          | probable ATP-dependent RNA helicase DDX6                            | 13  | 6   | 17 | 36  | -0.01   | 0   | 7   | 5   | 12  | 0.15  |   |
| 148540198 | Dhx34         | probable ATP-dependent RNA helicase DHX34                           | 0   | 0   | 2  | 2   | 0.29    | 0   | 1   | 0   | 1   | -0.58 | # |
| 240848573 | Dhx36         | probable ATP-dependent RNA helicase DHX36                           | 1   | 4   | 1  | 6   | 0.20    | 0   | 2   | 1   | 3   | 0.38  |   |
| 42600571  | Dhx37         | probable ATP-dependent RNA helicase DHX37                           | 6   | 9   | 2  | 17  | -0.18   | 0   | 17  | 14  | 31  | -0.01 |   |
| 283135194 | Atp13a1       | probable cation-transporting ATPase 13A1                            | 0   | 5   | 2  | 7   | -0.08   | 0   | 6   | 15  | 21  | -0.21 |   |
| 21313560  | Dimt1         | probable dimethyladenosine transferase                              | 8   | 5   | 3  | 16  | -0.11   | 0   | 0   | 3   | 3   | -0.15 |   |
| 31324532  | 6530401N04Rik | probable D-tyrosyl-tRNA(Tyr) deacylase 2                            | 5   | 1   | 4  | 10  | 0.02    | 0   | 0   | 0   | 0   |       |   |
| 10946822  | 0610007P14Rik | probable ergosterol biosynthetic protein 28                         | 0   | 0   | 0  | 0   |         | 1   | 0   | 0   | 1   | -1.26 | # |
| 262050608 | Smarca1       | probable global transcription activator SNF2L1                      | 0   | 0   | 0  | 0   |         | 0   | 1   | 0   | 1   | -3.50 | # |

|           |               |                                                                                 |    |    |    |     |         |     |    |    |     |        |
|-----------|---------------|---------------------------------------------------------------------------------|----|----|----|-----|---------|-----|----|----|-----|--------|
| 21312790  | Myst1         | probable histone acetyltransferase MYST1                                        | 1  | 3  | 2  | 6   | 0.07*   | 0   | 0  | 0  | 0   |        |
| 295424166 | Whsc1         | probable histone-lysine N-methyltransferase NSD2 isoform 2                      | 5  | 3  | 0  | 8   | 0.18    | 0   | 5  | 7  | 12  | -0.05  |
| 226531205 | Jmjd1c        | probable JmjC domain-containing histone demethylation protein 2C                | 0  | 2  | 0  | 2   | 0.76#   | 0   | 0  | 0  | 0   |        |
| 258613873 | Apip          | probable methylthioribulose-1-phosphate dehydratase                             | 3  | 0  | 6  | 9   | 0.49    | 0   | 3  | 0  | 3   | -0.47# |
| 197927090 | 2810006K23Rik | probable peptide chain release factor C12orf65 homolog, mitochondrial isoform a | 5  | 9  | 6  | 20  | -0.10   | 0   | 0  | 0  | 0   |        |
| 30519902  | Pthr1         | probable peptidyl-tRNA hydrolase                                                | 1  | 2  | 3  | 6   | -0.25   | 0   | 0  | 0  | 0   |        |
| 27881427  | Srd5a3        | probable polyprenol reductase                                                   | 2  | 2  | 2  | 6   | -0.23   | 0   | 2  | 1  | 3   | -0.11  |
| 139948347 | Pars2         | probable prolyl-tRNA synthetase, mitochondrial isoform 1                        | 0  | 1  | 1  | 2   | -0.41   | 0   | 0  | 0  | 0   |        |
| 30794154  | Rbm19         | probable RNA-binding protein 19                                                 | 2  | 2  | 3  | 7   | 0.16    | 4   | 29 | 46 | 79  | 0.21   |
| 21312728  | Ebna1bp2      | probable rRNA-processing protein EBP2                                           | 0  | 0  | 0  | 0   |         | 4   | 14 | 16 | 34  | 0.12   |
| 30520019  | Sccpdh        | probable saccharopine dehydrogenase                                             | 0  | 0  | 3  | 3   | 0.02    | 0   | 0  | 0  | 0   |        |
| 27229243  | Mettl15       | probable S-adenosyl-L-methionine-dependent methyltransferase METT5D1            | 4  | 8  | 1  | 13  | -0.43   | 0   | 0  | 0  | 0   |        |
| 13385534  | Utp11l        | probable U3 small nucleolar RNA-associated protein 11                           | 0  | 0  | 0  | 0   |         | 4   | 8  | 10 | 22  | -0.09  |
| 115511018 | Usp9x         | probable ubiquitin carboxyl-terminal hydrolase FAF-X                            | 0  | 0  | 0  | 0   |         | 0   | 0  | 6  | 6   | -0.63# |
| 28893421  | Xpnpep3       | probable Xaa-Pro aminopeptidase 3                                               | 3  | 3  | 5  | 11  | -0.03   | 0   | 5  | 8  | 13  | -0.06  |
| 21312814  | Pop1          | processing of precursor 1 isoform 2                                             | 6  | 4  | 8  | 18  | 0.32    | 0   | 0  | 3  | 3   | 0.35   |
| 170784829 | Glt25d1       | procollagen galactosyltransferase 1 precursor                                   | 1  | 0  | 0  | 1   | 0.08    | 0   | 0  | 0  | 0   |        |
| 218931165 | Plod2         | procollagen-lysine,2-oxoglutarate 5-dioxygenase 2 isoform 2                     | 6  | 5  | 3  | 14  | -0.37   | 0   | 0  | 0  | 0   |        |
| 6755110   | Plod3         | procollagen-lysine,2-oxoglutarate 5-dioxygenase 3 precursor                     | 1  | 0  | 0  | 1   | 0.12    | 0   | 0  | 0  | 0   |        |
| 6755040   | Pfn1          | profilin-1                                                                      | 21 | 9  | 14 | 44  | -0.03   | 108 | 35 | 87 | 230 | -0.05  |
| 12963841  | Paqr4         | progesterin and adipoQ receptor family member 4                                 | 1  | 0  | 0  | 1   | -0.44   | 0   | 0  | 0  | 0   |        |
| 258547156 | Pdcd6ip       | programmed cell death 6-interacting protein isoform 3                           | 0  | 0  | 0  | 0   |         | 0   | 0  | 1  | 1   | -1.02# |
| 31560391  | Pdcd10        | programmed cell death protein 10                                                | 15 | 12 | 16 | 43  | 0.19    | 0   | 2  | 2  | 4   | 1.16#  |
| 270309159 | Pdcd4         | programmed cell death protein 4                                                 | 0  | 0  | 0  | 0   |         | 0   | 0  | 1  | 1   | -0.14  |
| 309264292 | Gm3837        | programmed cell death protein 5-like                                            | 3  | 3  | 5  | 11  | 0.01    | 0   | 0  | 0  | 0   |        |
| 6755000   | Pdcd6         | programmed cell death protein 6                                                 | 0  | 0  | 0  | 0   |         | 0   | 1  | 1  | 2   | -0.16  |
| 148271093 | Pdcd7         | programmed cell death protein 7                                                 | 1  | 1  | 0  | 2   | 0.06    | 0   | 0  | 0  | 0   |        |
| 6679299   | Phb           | prohibitin                                                                      | 14 | 12 | 12 | 38  | -0.26   | 54  | 22 | 9  | 85  | -0.11  |
| 126723336 | Phb2          | prohibitin-2                                                                    | 17 | 15 | 16 | 48  | -0.12   | 84  | 32 | 43 | 159 | -0.15  |
| 7242171   | Pcna          | proliferating cell nuclear antigen                                              | 37 | 37 | 31 | 105 | -0.17   | 25  | 46 | 31 | 102 | -0.32  |
| 6755100   | Pa2g4         | proliferation-associated protein 2G4                                            | 30 | 33 | 32 | 95  | -0.13   | 0   | 4  | 8  | 12  | 0.16   |
| 153791304 | Prr12         | proline rich 12                                                                 | 2  | 4  | 1  | 7   | 0.57*,# | 0   | 0  | 0  | 0   |        |
| 16930823  | Prosc         | proline synthase co-transcribed bacterial homolog protein isoform a             | 0  | 0  | 0  | 0   |         | 0   | 1  | 0  | 1   | -0.89# |
| 84872182  | Prosc         | proline synthase co-transcribed bacterial homolog protein isoform b             | 2  | 0  | 0  | 2   | -0.03   | 0   | 0  | 2  | 2   | 0.00   |
| 257900472 | Pelp1         | proline-, glutamic acid- and leucine-rich protein 1                             | 41 | 45 | 33 | 119 | 0.34*   | 1   | 12 | 2  | 15  | 0.20   |
| 298231158 | Psrc1         | proline/serine-rich coiled-coil protein 1                                       | 0  | 1  | 0  | 1   | 0.25    | 0   | 0  | 0  | 0   |        |
| 22122505  | Prr15l        | proline-rich protein 15-like protein                                            | 1  | 1  | 3  | 5   | 0.09    | 0   | 0  | 0  | 0   |        |
| 27734076  | Leprel1       | prolyl 3-hydroxylase 2 precursor                                                | 0  | 1  | 0  | 1   | -3.47#  | 0   | 0  | 0  | 0   |        |
| 33859596  | P4ha1         | prolyl 4-hydroxylase subunit alpha-1 precursor                                  | 18 | 14 | 12 | 44  | -0.11   | 0   | 5  | 5  | 10  | -0.07  |

|           |               |                                                               |    |    |    |     |        |    |    |    |     |        |  |
|-----------|---------------|---------------------------------------------------------------|----|----|----|-----|--------|----|----|----|-----|--------|--|
| 13385310  | Pccb          | propionyl-CoA carboxylase beta chain, mitochondrial precursor | 2  | 0  | 0  | 2   | -0.40  | 0  | 0  | 0  | 0   |        |  |
| 260763900 | Ptges2        | prostaglandin E synthase 2                                    | 4  | 0  | 0  | 4   | -0.16  | 0  | 0  | 3  | 3   | -0.19  |  |
| 149255697 | LOC100048119  | prostaglandin E synthase 3-like                               | 2  | 6  | 4  | 12  | -0.13  | 13 | 19 | 14 | 46  | -0.12  |  |
| 6679537   | Ptgs1         | prostaglandin G/H synthase 1 precursor                        | 5  | 0  | 0  | 5   | -0.27  | 0  | 0  | 0  | 0   |        |  |
| 16716569  | Prss1         | protease, serine, 1                                           | 8  | 0  | 0  | 8   | -8.00# | 6  | 0  | 8  | 14  | -8.40# |  |
| 6755212   | Psme1         | proteasome activator complex subunit 1                        | 0  | 0  | 0  | 0   |        | 0  | 1  | 2  | 3   | 0.36   |  |
| 6755214   | Psme3         | proteasome activator complex subunit 3                        | 1  | 0  | 0  | 1   | 0.36   | 0  | 0  | 0  | 0   |        |  |
| 33563282  | Psma1         | proteasome subunit alpha type-1                               | 2  | 2  | 2  | 6   | -0.03  | 0  | 0  | 0  | 0   |        |  |
| 134031994 | Psma2         | proteasome subunit alpha type-2                               | 4  | 10 | 7  | 21  | 0.05   | 0  | 0  | 4  | 4   | -0.06  |  |
| 261824000 | Psma3         | proteasome subunit alpha type-3                               | 0  | 3  | 1  | 4   | -0.08  | 0  | 0  | 0  | 0   |        |  |
| 6755196   | Psma4         | proteasome subunit alpha type-4                               | 7  | 12 | 18 | 37  | 0.11   | 1  | 1  | 1  | 3   | 0.89#  |  |
| 7106387   | Psma5         | proteasome subunit alpha type-5                               | 8  | 7  | 11 | 26  | 0.48   | 0  | 3  | 4  | 7   | -0.15  |  |
| 6755198   | Psma6         | proteasome subunit alpha type-6                               | 4  | 7  | 4  | 15  | 0.11   | 0  | 2  | 1  | 3   | 0.07   |  |
| 7106389   | Psma7         | proteasome subunit alpha type-7                               | 10 | 10 | 12 | 32  | 0.07   | 0  | 2  | 3  | 5   | 0.12   |  |
| 7242197   | Psmb1         | proteasome subunit beta type-1 precursor                      | 6  | 8  | 9  | 23  | -0.01  | 0  | 1  | 3  | 4   | 0.23   |  |
| 227116345 | Psmb2         | proteasome subunit beta type-2                                | 7  | 7  | 5  | 19  | 0.16*  | 0  | 2  | 2  | 4   | -0.06  |  |
| 6755202   | Psmb3         | proteasome subunit beta type-3                                | 5  | 6  | 7  | 18  | 0.06   | 0  | 2  | 2  | 4   | -0.03  |  |
| 254540082 | Psmb4         | proteasome subunit beta type-4 precursor                      | 5  | 6  | 4  | 15  | 0.08   | 0  | 0  | 0  | 0   |        |  |
| 6755204   | Psmb5         | proteasome subunit beta type-5                                | 10 | 13 | 7  | 30  | 0.10   | 0  | 1  | 3  | 4   | 0.04   |  |
| 238231384 | Psmb6         | proteasome subunit beta type-6 precursor                      | 2  | 3  | 3  | 8   | 0.04   | 0  | 1  | 2  | 3   | 1.00#  |  |
| 6755206   | Psmb7         | proteasome subunit beta type-7 precursor                      | 3  | 0  | 0  | 3   | 0.29   | 0  | 0  | 0  | 0   |        |  |
| 37718970  | AI314180      | proteasome-associated protein ECM29 homolog                   | 0  | 0  | 0  | 0   |        | 0  | 0  | 2  | 2   | -0.37  |  |
| 190684673 | Epb4.1        | protein 4.1 isoform 3                                         | 0  | 2  | 0  | 2   | 1.60#  | 0  | 0  | 1  | 1   | 0.05   |  |
| 9790013   | Aatf          | protein AATF                                                  | 0  | 0  | 0  | 0   |        | 2  | 12 | 12 | 26  | 0.06   |  |
| 309272904 | LOC100503606  | protein AHNAK2-like                                           | 10 | 44 | 41 | 95  | 0.95#  | 0  | 0  | 0  | 0   |        |  |
| 117959930 | Gnas          | protein ALEX GNASL                                            | 0  | 6  | 11 | 17  | 0.09   | 0  | 7  | 0  | 7   | 0.15   |  |
| 117959928 | Gnas          | protein ALEX isoform g                                        | 3  | 0  | 0  | 3   | 0.31   | 0  | 0  | 3  | 3   | 0.24   |  |
| 312222726 | Angel2        | protein angel homolog 2 isoform 2                             | 0  | 0  | 1  | 1   | -0.09  | 0  | 0  | 0  | 0   |        |  |
| 9790109   | Prmt1         | protein arginine N-methyltransferase 1                        | 0  | 2  | 2  | 4   | 0.77#  | 0  | 1  | 3  | 4   | 0.04   |  |
| 219842353 | Eif2c2        | protein argonaute-2                                           | 2  | 2  | 3  | 7   | 0.15   | 0  | 1  | 1  | 2   | -0.11  |  |
| 21312118  | Arv1          | protein ARV1                                                  | 0  | 0  | 0  | 0   |        | 0  | 2  | 0  | 2   | 0.18   |  |
| 158534069 | Banp          | protein BANP isoform 1                                        | 0  | 2  | 0  | 2   | 0.02   | 0  | 0  | 0  | 0   |        |  |
| 19527154  | 6720456B07Rik | protein BRICK1                                                | 3  | 3  | 2  | 8   | -0.08  | 0  | 0  | 0  | 0   |        |  |
| 57222238  | Bud31         | protein BUD31 homolog                                         | 11 | 14 | 10 | 35  | 0.00   | 4  | 4  | 3  | 11  | 0.10   |  |
| 149271901 | LOC100045848  | protein BUD31 homolog isoform 2                               | 12 | 12 | 8  | 32  | -0.01  | 3  | 11 | 0  | 14  | 0.09   |  |
| 7305107   | Grc10         | protein C10                                                   | 2  | 1  | 0  | 3   | 0.33   | 0  | 0  | 0  | 0   |        |  |
| 158966725 | 2310008H09Rik | protein C16orf88 homolog isoform 1                            | 0  | 0  | 0  | 0   |        | 0  | 0  | 1  | 1   | 2.29#  |  |
| 58037443  | 2310003C23Rik | protein C20orf11 homolog                                      | 2  | 2  | 1  | 5   | 0.35   | 0  | 1  | 0  | 1   | -0.15  |  |
| 9903607   | Cnpy2         | protein canopy homolog 2 precursor                            | 16 | 7  | 8  | 31  | -0.01  | 2  | 5  | 3  | 10  | -0.47# |  |
| 21312510  | Cnpy3         | protein canopy homolog 3 precursor                            | 5  | 5  | 8  | 18  | -0.16  | 0  | 0  | 0  | 0   |        |  |
| 30519939  | Cnpy4         | protein canopy homolog 4 precursor                            | 3  | 0  | 0  | 3   | 0.78#  | 0  | 0  | 0  | 0   |        |  |
| 158631198 | Cic           | protein capicua homolog isoform b                             | 0  | 1  | 0  | 1   | 0.62#  | 0  | 0  | 0  | 0   |        |  |
| 110835729 | Cux1          | protein CASP isoform a                                        | 31 | 43 | 35 | 109 | 0.39*  | 0  | 0  | 0  | 0   |        |  |
| 110815859 | Cux1          | protein CASP isoform b                                        | 2  | 9  | 10 | 21  | 0.54*  | 0  | 0  | 0  | 0   |        |  |
| 268607692 | BC003965      | protein CCSMST1                                               | 1  | 1  | 0  | 2   | -0.15  | 0  | 0  | 0  | 0   |        |  |
| 197313683 | Cdv3          | protein CDV3 isoform c                                        | 2  | 4  | 3  | 9   | -0.01  | 0  | 0  | 0  | 0   |        |  |
| 162135966 | Cobl          | protein cordon-bleu                                           | 0  | 1  | 0  | 1   | 0.73#  | 0  | 0  | 0  | 0   |        |  |
| 12963537  | Cwc15         | protein CWC15 homolog                                         | 17 | 14 | 8  | 39  | 0.14   | 7  | 9  | 11 | 27  | 0.20*  |  |
| 253795498 | Dek           | protein DEK                                                   | 72 | 69 | 51 | 192 | -0.08  | 48 | 40 | 37 | 125 | -0.10  |  |
| 6681183   | Diap1         | protein diaphanous homolog 1                                  | 1  | 1  | 2  | 4   | 0.00   | 0  | 0  | 0  | 0   |        |  |
| 112293264 | Pdia3         | protein disulfide-isomerase A3 precursor                      | 63 | 24 | 36 | 123 | -0.21* | 81 | 40 | 47 | 168 | -0.12* |  |
| 86198316  | Pdia4         | protein disulfide-isomerase A4                                | 25 | 20 | 31 | 76  | -0.10  | 3  | 6  | 15 | 24  | -0.10  |  |
| 30794140  | Pdia5         | protein disulfide-isomerase A5 precursor                      | 9  | 9  | 4  | 22  | -0.14  | 0  | 0  | 0  | 0   |        |  |
| 58037267  | Pdia6         | protein disulfide-isomerase A6                                | 22 | 0  | 13 | 35  | -0.11  | 18 | 7  | 8  | 33  | -0.17  |  |
| 309262617 | LOC100046302  | protein disulfide-isomerase A6-like                           | 0  | 6  | 0  | 6   | -0.31  | 0  | 0  | 0  | 0   |        |  |

|           |               |                                                                   |     |     |     |     |         |  |    |    |    |     |         |  |
|-----------|---------------|-------------------------------------------------------------------|-----|-----|-----|-----|---------|--|----|----|----|-----|---------|--|
| 42415475  | P4hb          | protein disulfide-isomerase precursor                             | 39  | 12  | 26  | 77  | -0.07   |  | 34 | 14 | 19 | 67  | 0.16    |  |
| 117606385 | Tmx3          | protein disulfide-isomerase TMX3 precursor                        | 2   | 0   | 0   | 2   | -0.71 # |  | 0  | 0  | 0  | 0   |         |  |
| 31541998  | Dpcd          | protein DPCD                                                      | 0   | 1   | 0   | 1   | -0.34   |  | 0  | 0  | 0  | 0   |         |  |
| 226246654 | Dpy30         | protein dpy-30 homolog                                            | 24  | 18  | 7   | 49  | 0.18    |  | 38 | 13 | 7  | 58  | 0.16 *  |  |
| 27754097  | Dr1           | protein Dr1                                                       | 3   | 7   | 4   | 14  | 0.13    |  | 0  | 1  | 1  | 2   | 0.24    |  |
| 54020730  | Efr3a         | protein EFR3 homolog A                                            | 0   | 0   | 0   | 0   |         |  | 0  | 0  | 2  | 2   | 0.76 #  |  |
| 158508460 | Ahctf1        | protein ELYS                                                      | 51  | 72  | 50  | 173 | -0.08   |  | 17 | 54 | 74 | 145 | -0.03   |  |
| 11612511  | Milt1         | protein ENL                                                       | 0   | 1   | 2   | 3   | 0.06    |  | 0  | 0  | 0  | 0   |         |  |
| 11528490  | Flii          | protein flightless-1 homolog                                      | 19  | 47  | 23  | 89  | 0.22    |  | 0  | 4  | 13 | 17  | -0.06   |  |
| 225543552 | Frg1          | protein FRG1                                                      | 9   | 15  | 12  | 36  | -0.09   |  | 0  | 8  | 5  | 13  | 0.19    |  |
| 52426778  | Hira          | protein HIRA                                                      | 7   | 20  | 9   | 36  | 0.49    |  | 1  | 3  | 3  | 7   | 0.31    |  |
| 30352010  | Iws1          | protein IWS1 homolog                                              | 11  | 14  | 14  | 39  | 0.07    |  | 2  | 14 | 14 | 30  | -0.16   |  |
| 40556384  | Phf17         | protein Jade-1                                                    | 0   | 0   | 0   | 0   |         |  | 0  | 0  | 6  | 6   | -0.20   |  |
| 13385862  | Jagn1         | protein jagunal homolog 1 isoform 1                               | 5   | 0   | 1   | 6   | -0.24   |  | 4  | 1  | 0  | 5   | -0.42   |  |
| 28077027  | Pacsin3       | protein kinase C and casein kinase II substrate protein 3         | 6   | 5   | 9   | 20  | -0.04   |  | 0  | 0  | 0  | 0   |         |  |
| 7106381   | Pacsin2       | protein kinase C and casein kinase substrate in neurons protein 2 | 0   | 5   | 1   | 6   | -0.66 # |  | 0  | 0  | 0  | 0   |         |  |
| 91064878  | Zmynd8        | protein kinase C-binding protein 1                                | 22  | 28  | 22  | 72  | 0.30 *  |  | 2  | 13 | 4  | 19  | 0.09    |  |
| 157909778 | Kri1          | protein KRI1 homolog                                              | 3   | 6   | 5   | 14  | 0.04    |  | 0  | 8  | 8  | 16  | 0.20    |  |
| 54607112  | Erb2ip        | protein LAP2 isoform 2                                            | 0   | 0   | 2   | 2   | 0.43    |  | 0  | 0  | 8  | 8   | 0.70 #  |  |
| 21313004  | Lin37         | protein lin-37 homolog                                            | 1   | 0   | 1   | 2   | 0.37 *  |  | 0  | 0  | 0  | 0   |         |  |
| 82935391  | Gm7020        | protein lin-52 homolog                                            | 1   | 1   | 2   | 4   | 0.25    |  | 0  | 0  | 0  | 0   |         |  |
| 6755973   | Lin7c         | protein lin-7 homolog C                                           | 9   | 16  | 8   | 33  | 0.17    |  | 0  | 7  | 4  | 11  | 0.14    |  |
| 157057190 | Lin9          | protein lin-9 homolog isoform 2                                   | 0   | 1   | 0   | 1   | 0.19    |  | 0  | 0  | 0  | 0   |         |  |
| 149270995 | Gm14535       | protein LLP homolog                                               | 0   | 1   | 0   | 1   | -0.16   |  | 0  | 3  | 2  | 5   | 0.76 #  |  |
| 31711990  | Lsm12         | protein LSM12 homolog                                             | 2   | 1   | 2   | 5   | 0.22    |  | 0  | 0  | 0  | 0   |         |  |
| 31982233  | Mtdh          | protein LYRIC                                                     | 20  | 24  | 17  | 61  | -0.48 * |  | 0  | 1  | 0  | 1   | 3.01 #  |  |
| 6754616   | Magoh         | protein mago nashi homolog                                        | 8   | 11  | 10  | 29  | 0.15    |  | 63 | 6  | 12 | 81  | -0.03   |  |
| 33468997  | Mak16         | protein MAK16 homolog                                             | 0   | 0   | 0   | 0   |         |  | 3  | 11 | 11 | 25  | -0.07   |  |
| 30725780  | Mal2          | protein MAL2                                                      | 0   | 1   | 0   | 1   | 0.44    |  | 0  | 0  | 0  | 0   |         |  |
| 254540070 | Manbal        | protein MANBAL                                                    | 4   | 3   | 4   | 11  | -0.66 # |  | 7  | 0  | 2  | 9   | -0.36   |  |
| 226051848 | Max           | protein max isoform 2                                             | 5   | 14  | 3   | 22  | 0.11    |  | 0  | 3  | 2  | 5   | 0.09    |  |
| 21313120  | Mis12         | protein MIS12 homolog                                             | 3   | 5   | 1   | 9   | 0.03    |  | 0  | 2  | 0  | 2   | -0.19   |  |
| 70909369  | 2610039C10Rik | protein Mis18-alpha                                               | 0   | 0   | 0   | 0   |         |  | 0  | 1  | 1  | 2   | 0.15    |  |
| 6678926   | Mpv17         | protein Mpv17                                                     | 3   | 2   | 4   | 9   | 0.11    |  | 1  | 0  | 0  | 1   | 0.43    |  |
| 118150658 | Ndr1          | protein NDRG1                                                     | 11  | 2   | 6   | 19  | -0.42   |  | 0  | 0  | 10 | 10  | -0.23   |  |
| 241982745 | Fam129a       | protein Niban                                                     | 0   | 0   | 3   | 3   | -0.22   |  | 1  | 7  | 41 | 49  | -0.12   |  |
| 6679066   | Nipsnap1      | protein NipSnap homolog 1                                         | 8   | 8   | 8   | 24  | -0.17   |  | 0  | 0  | 1  | 1   | 0.09    |  |
| 160298168 | Gbas          | protein NipSnap homolog 2                                         | 7   | 6   | 2   | 15  | -0.25   |  | 0  | 0  | 0  | 0   |         |  |
| 13385084  | Nipsnap3b     | protein NipSnap homolog 3A                                        | 1   | 0   | 2   | 3   | -0.22   |  | 0  | 0  | 0  | 0   |         |  |
| 116805317 | BC003331      | protein odr-4 homolog isoform 2                                   | 0   | 0   | 1   | 1   | -0.16   |  | 0  | 2  | 1  | 3   | -0.72 # |  |
| 27369505  | Poglut1       | protein O-glucosyltransferase 1 precursor                         | 8   | 14  | 9   | 31  | -0.03   |  | 0  | 1  | 1  | 2   | -0.02   |  |
| 86439951  | Mtcp1         | protein p8 MTCP-1 isoform a                                       | 2   | 0   | 0   | 2   | 0.04    |  | 0  | 0  | 0  | 0   |         |  |
| 164698448 | Pelo          | protein pelota homolog                                            | 0   | 1   | 1   | 2   | 0.05    |  | 0  | 0  | 6  | 6   | -0.01   |  |
| 95772123  | Ppp1r12a      | protein phosphatase 1 regulatory subunit 12A                      | 13  | 24  | 20  | 57  | 0.55    |  | 0  | 0  | 2  | 2   | 0.36    |  |
| 124249341 | Ppp1r12c      | protein phosphatase 1 regulatory subunit 12C                      | 0   | 1   | 0   | 1   | 9.84 #  |  | 0  | 0  | 0  | 0   |         |  |
| 254911016 | Ppm1d         | protein phosphatase 1D                                            | 0   | 0   | 0   | 0   |         |  | 0  | 2  | 2  | 4   | -0.02   |  |
| 6679793   | Ppm1g         | protein phosphatase 1G                                            | 0   | 0   | 0   | 0   |         |  | 0  | 1  | 2  | 3   | -0.45 # |  |
| 160333286 | Pml           | protein PML isoform 1                                             | 4   | 0   | 0   | 4   | 0.33    |  | 16 | 15 | 10 | 41  | 0.19    |  |
| 160333282 | Pml           | protein PML isoform 2                                             | 0   | 13  | 9   | 22  | 0.05    |  | 0  | 79 | 79 | 158 | 0.31    |  |
| 124486951 | Pbrm1         | protein polybromo-1                                               | 120 | 154 | 118 | 392 | -0.06   |  | 15 | 44 | 26 | 85  | 0.08    |  |
| 258613904 | Ptar1         | protein prenyltransferase alpha subunit repeat containing 1       | 0   | 0   | 0   | 0   |         |  | 0  | 1  | 0  | 1   | 10.07 # |  |

|           |               |                                                         |    |     |     |     |        |    |     |     |     |        |  |
|-----------|---------------|---------------------------------------------------------|----|-----|-----|-----|--------|----|-----|-----|-----|--------|--|
| 124486835 | Prrc2c        | protein PRRC2C                                          | 1  | 4   | 0   | 5   | -0.45  | 0  | 0   | 0   | 0   |        |  |
| 27597069  | Prune         | protein prune homolog                                   | 0  | 0   | 0   | 0   |        | 0  | 0   | 1   | 1   | 0.02   |  |
| 23346595  | Z410015M20Rik | protein QIL1                                            | 10 | 0   | 2   | 12  | -0.17  | 7  | 0   | 1   | 8   | 0.03   |  |
| 226958438 | Qk            | protein quaking isoform 2                               | 10 | 25  | 6   | 41  | -0.04  | 0  | 1   | 0   | 1   | -0.29  |  |
| 33239431  | Rcc2          | protein RCC2                                            | 34 | 29  | 25  | 88  | 0.07   | 0  | 9   | 11  | 20  | 0.34   |  |
| 33468955  | lk            | protein Red                                             | 7  | 21  | 23  | 51  | 0.08   | 9  | 33  | 17  | 59  | 0.03   |  |
| 188219557 | Prc1          | protein regulator of cytokinesis 1                      | 1  | 0   | 0   | 1   | 0.67#  | 0  | 0   | 0   | 0   |        |  |
| 13385882  | Rer1          | protein RER1                                            | 4  | 3   | 3   | 10  | -0.33  | 2  | 1   | 0   | 3   | 0.02   |  |
| 124486767 | C030046E11Rik | protein RIC1 homolog                                    | 0  | 0   | 0   | 0   |        | 0  | 1   | 0   | 1   | 10.07# |  |
| 54607128  | Pdcd11        | protein RRP5 homolog                                    | 72 | 114 | 60  | 246 | -0.12  | 95 | 219 | 425 | 739 | -0.02  |  |
| 6755386   | S100a1        | protein S100-A1                                         | 2  | 2   | 2   | 6   | -0.06  | 0  | 0   | 4   | 4   | -0.30  |  |
| 6677833   | S100a10       | protein S100-A10                                        | 8  | 5   | 8   | 21  | -0.16  | 3  | 4   | 4   | 11  | 0.01   |  |
| 309265057 | LOC100502897  | protein S100-A11-like isoform 1                         | 14 | 11  | 14  | 39  | -0.08  | 7  | 8   | 8   | 23  | 0.16   |  |
| 6677835   | S100a13       | protein S100-A13                                        | 3  | 5   | 4   | 12  | -0.45  | 0  | 0   | 0   | 0   |        |  |
| 254587904 | S100a14       | protein S100-A14 isoform a                              | 14 | 20  | 14  | 48  | 0.29   | 9  | 3   | 7   | 19  | 0.51*# |  |
| 6755392   | S100a6        | protein S100-A6                                         | 0  | 0   | 0   | 0   |        | 0  | 2   | 0   | 2   | -0.70# |  |
| 30527367  | Scaf8         | protein SCAF8                                           | 6  | 10  | 10  | 26  | -0.03  | 0  | 0   | 0   | 0   |        |  |
| 86198339  | Scai          | protein SCAI                                            | 0  | 0   | 0   | 0   |        | 0  | 9   | 7   | 16  | -0.01  |  |
| 20373163  | Scrib         | protein scribble homolog                                | 1  | 8   | 0   | 9   | 1.54#  | 0  | 0   | 0   | 0   |        |  |
| 29150272  | Sec13         | protein SEC13 homolog                                   | 17 | 28  | 12  | 57  | -0.20  | 12 | 14  | 15  | 41  | 0.01   |  |
| 46309573  | Sel1l         | protein sel-1 homolog 1 isoform b                       | 2  | 0   | 0   | 2   | -1.08# | 0  | 0   | 0   | 0   |        |  |
| 309266563 | Gm9531        | protein SET-like, partial                               | 13 | 14  | 9   | 36  | 0.12   | 0  | 6   | 8   | 14  | 0.00   |  |
| 21312548  | 1500002O20Rik | protein SMG9                                            | 0  | 0   | 0   | 0   |        | 1  | 0   | 0   | 1   | -3.80# |  |
| 124358955 | Son           | protein SON                                             | 0  | 60  | 32  | 92  | 0.20   | 0  | 47  | 49  | 96  | 0.34   |  |
| 124378037 | Son           | protein SON truncated isoform                           | 9  | 0   | 0   | 9   | 0.09   | 16 | 0   | 20  | 36  | 0.63#  |  |
| 66955868  | Srek1ip1      | protein SREK1IP1                                        | 0  | 1   | 0   | 1   | -0.27  | 0  | 0   | 1   | 1   | -0.43  |  |
| 238624176 | Ss18          | protein SSXT isoform 4                                  | 2  | 0   | 2   | 4   | 0.58#  | 0  | 1   | 1   | 2   | 0.57#  |  |
| 13385314  | Nudt16l1      | protein syndesmos                                       | 33 | 47  | 25  | 105 | -0.04  | 3  | 21  | 12  | 36  | -0.01  |  |
| 57164407  | Tanc1         | protein TANC1                                           | 0  | 0   | 0   | 0   |        | 0  | 0   | 1   | 1   | 2.63#  |  |
| 209862977 | Timeless      | protein timeless homolog isoform 1                      | 0  | 0   | 0   | 0   |        | 0  | 1   | 0   | 1   | -0.03  |  |
| 67906177  | Sec23a        | protein transport protein Sec23A                        | 0  | 0   | 2   | 2   | -0.23  | 0  | 1   | 4   | 5   | -0.15  |  |
| 31980969  | Sec23b        | protein transport protein Sec23B                        | 4  | 6   | 2   | 12  | -0.34  | 0  | 2   | 8   | 10  | -0.08  |  |
| 46402179  | Sec24b        | protein transport protein Sec24B                        | 2  | 4   | 1   | 7   | -0.40  | 0  | 0   | 1   | 1   | -0.19  |  |
| 244791271 | Sec31a        | protein transport protein Sec31A                        | 0  | 0   | 0   | 0   |        | 0  | 0   | 1   | 1   | 0.32   |  |
| 8394252   | Sec61a1       | protein transport protein Sec61 subunit alpha isoform 1 | 3  | 4   | 1   | 8   | -0.24  | 0  | 3   | 0   | 3   | -0.10  |  |
| 149255928 | LOC100044742  | protein tyrosine phosphatase type IVA 1-like isoform 1  | 0  | 4   | 4   | 8   | 0.08   | 0  | 0   | 0   | 0   |        |  |
| 258613926 | Ptp4a2        | protein tyrosine phosphatase type IVA 2                 | 7  | 10  | 6   | 23  | 0.00   | 0  | 0   | 1   | 1   | 0.45#  |  |
| 30425054  | Unc119b       | protein unc-119 homolog B                               | 2  | 0   | 2   | 4   | 0.19*  | 0  | 0   | 2   | 2   | -0.01  |  |
| 124487145 | 1110037F02Rik | protein virilizer homolog                               | 13 | 36  | 23  | 72  | 0.45*  | 0  | 0   | 0   | 0   |        |  |
| 46909563  | Wiz           | protein Wiz isoform 2                                   | 3  | 6   | 1   | 10  | 0.15   | 4  | 14  | 13  | 31  | -0.03  |  |
| 98986316  | Wls           | protein wntless homolog precursor                       | 1  | 0   | 0   | 1   | -0.18  | 0  | 0   | 0   | 0   |        |  |
| 25282409  | Yif1a         | protein YIF1A                                           | 2  | 0   | 0   | 2   | 0.36   | 1  | 1   | 1   | 3   | 0.07   |  |
| 156938252 | Padi4         | protein-arginine deiminase type-4                       | 85 | 128 | 105 | 318 | -0.20  | 34 | 61  | 108 | 203 | -0.19  |  |
| 226530884 | Pcmt1         | protein-L-isoaspartate(D-aspartate) O-methyltransferase | 4  | 5   | 3   | 12  | -0.02  | 0  | 2   | 3   | 5   | 0.21   |  |
| 23956130  | Ptpmt1        | protein-tyrosine phosphatase mitochondrial 1            | 3  | 3   | 3   | 9   | -0.24  | 2  | 2   | 2   | 6   | -0.14  |  |
| 7110705   | Ptma          | prothymosin alpha                                       | 13 | 8   | 10  | 31  | 0.31   | 0  | 0   | 5   | 5   | 0.08   |  |
| 6679445   | Ppox          | protoporphyrinogen oxidase                              | 0  | 0   | 0   | 0   |        | 0  | 0   | 2   | 2   | -0.08  |  |
| 13384608  | Pcbd1         | pterin-4-alpha-carbinolamine dehydratase                | 2  | 4   | 0   | 6   | 0.08   | 0  | 0   | 0   | 0   |        |  |
| 52421794  | Pcbd2         | pterin-4-alpha-carbinolamine dehydratase 2              | 1  | 2   | 2   | 5   | -0.13  | 0  | 0   | 0   | 0   |        |  |
| 169646352 | 2610027L16Rik | pumilio domain-containing protein C14orf21 homolog      | 3  | 0   | 0   | 3   | -0.21  | 0  | 7   | 5   | 12  | -0.06  |  |
| 237649087 | Pum2          | pumilio homolog 2 isoform 3                             | 0  | 0   | 1   | 1   | -0.66# | 0  | 0   | 0   | 0   |        |  |
| 7305395   | Pnp           | purine nucleoside phosphorylase                         | 2  | 2   | 3   | 7   | -0.12  | 0  | 0   | 0   | 0   |        |  |



|           |         |                                                                                          |    |    |    |     |         |     |     |     |     |         |  |
|-----------|---------|------------------------------------------------------------------------------------------|----|----|----|-----|---------|-----|-----|-----|-----|---------|--|
| 8393156   | Clpp    | putative ATP-dependent Clp protease proteolytic subunit, mitochondrial precursor         | 7  | 3  | 5  | 15  | -0.28   | 0   | 0   | 0   | 0   |         |  |
| 19111156  | Dhx30   | putative ATP-dependent RNA helicase DHX30                                                | 0  | 0  | 0  | 0   |         | 0   | 0   | 2   | 2   | 0.13    |  |
| 46560585  | Dhx33   | putative ATP-dependent RNA helicase DHX33                                                | 0  | 1  | 0  | 1   | 0.42    | 0   | 0   | 2   | 2   | -0.03   |  |
| 62234443  | Ino80   | putative DNA helicase INO80 complex homolog 1                                            | 12 | 24 | 9  | 45  | 0.04    | 0   | 0   | 0   | 0   |         |  |
| 165972313 | Gtpbp6  | putative GTP-binding protein 6                                                           | 3  | 4  | 9  | 16  | -0.05   | 0   | 0   | 4   | 4   | -0.18   |  |
| 254540179 | Mov10   | putative helicase MOV-10 isoform b                                                       | 0  | 0  | 0  | 0   |         | 0   | 0   | 4   | 4   | -0.23   |  |
| 21703836  | Hkdc1   | putative hexokinase HKDC1                                                                | 0  | 2  | 0  | 2   | 0.40    | 0   | 0   | 0   | 0   |         |  |
| 229577004 | Lipt2   | putative lipoyltransferase 2, mitochondrial precursor                                    | 1  | 4  | 3  | 8   | -0.02   | 0   | 0   | 0   | 0   |         |  |
| 21312938  | Mettl16 | putative methyltransferase METT10D                                                       | 1  | 2  | 1  | 4   | 0.19 *  | 0   | 0   | 0   | 0   |         |  |
| 154146245 | Nsun5   | putative methyltransferase NSUN5                                                         | 1  | 1  | 1  | 3   | 0.19    | 0   | 0   | 1   | 1   | 0.94 #  |  |
| 119392074 | Glyr1   | putative oxidoreductase GLYR1 isoform 1                                                  | 0  | 33 | 0  | 33  | 0.16    | 164 | 92  | 0   | 256 | -0.12   |  |
| 119392066 | Glyr1   | putative oxidoreductase GLYR1 isoform 2                                                  | 54 | 50 | 23 | 127 | -0.15   | 0   | 28  | 208 | 236 | -0.17   |  |
| 31560090  | Plbd2   | putative phospholipase B-like 2                                                          | 5  | 3  | 7  | 15  | -0.09   | 0   | 0   | 0   | 0   |         |  |
| 153792093 | Asxl2   | putative Polycomb group protein ASXL2                                                    | 0  | 4  | 0  | 4   | 0.42    | 0   | 0   | 0   | 0   |         |  |
| 110835726 | Dhx15   | putative pre-mRNA-splicing factor ATP-dependent RNA helicase DHX15 isoform 1             | 2  | 0  | 1  | 3   | -0.36   | 0   | 35  | 23  | 58  | 0.02    |  |
| 110835723 | Dhx15   | putative pre-mRNA-splicing factor ATP-dependent RNA helicase DHX15 isoform 2             | 44 | 70 | 41 | 155 | -0.06   | 167 | 150 | 239 | 556 | 0.10    |  |
| 158966689 | Nop2    | putative ribosomal RNA methyltransferase NOP2                                            | 13 | 30 | 9  | 52  | 0.05    | 44  | 76  | 90  | 210 | 0.08    |  |
| 241896855 | Rbm15b  | putative RNA-binding protein 15B                                                         | 2  | 4  | 1  | 7   | -0.98 # | 0   | 0   | 1   | 1   | -0.18   |  |
| 261862337 | Rbm3    | putative RNA-binding protein 3 isoform 1                                                 | 0  | 14 | 0  | 14  | 0.14    | 0   | 0   | 0   | 0   |         |  |
| 261862339 | Rbm3    | putative RNA-binding protein 3 isoform 2                                                 | 26 | 20 | 23 | 69  | 0.03    | 31  | 13  | 8   | 52  | -0.03   |  |
| 149234330 | Gm15453 | putative RNA-binding protein 3-like                                                      | 0  | 0  | 19 | 19  | -0.15   | 0   | 0   | 0   | 0   |         |  |
| 21536228  | Luc7l   | putative RNA-binding protein Luc7-like 1 isoform 1                                       | 4  | 9  | 3  | 16  | -0.03   | 3   | 14  | 17  | 34  | -0.01   |  |
| 283806685 | Luc7l2  | putative RNA-binding protein Luc7-like 2 isoform 3                                       | 13 | 21 | 9  | 43  | -0.05   | 12  | 19  | 25  | 56  | 0.14    |  |
| 13384672  | Ftsj3   | putative rRNA methyltransferase 3                                                        | 0  | 0  | 0  | 0   |         | 8   | 42  | 67  | 117 | 0.15 *  |  |
| 9910472   | Ovol1   | putative transcription factor Ovo-like 1                                                 | 1  | 2  | 0  | 3   | -0.12   | 0   | 0   | 0   | 0   |         |  |
| 50054188  | Mum1    | PWWP domain-containing protein MUM1                                                      | 1  | 6  | 1  | 8   | 0.01    | 0   | 2   | 0   | 2   | 0.03    |  |
| 72535128  | Pxk     | PX domain-containing protein kinase-like protein short isoform                           | 0  | 1  | 0  | 1   | 1.13 #  | 0   | 0   | 0   | 0   |         |  |
| 21450149  | Pycr1   | pyrroline-5-carboxylate reductase 1, mitochondrial                                       | 8  | 7  | 23 | 38  | -0.06   | 0   | 0   | 0   | 0   |         |  |
| 19526878  | Pycr2   | pyrroline-5-carboxylate reductase 2                                                      | 30 | 36 | 45 | 111 | 0.00    | 19  | 23  | 35  | 77  | 0.05    |  |
| 6679261   | Pdha1   | pyruvate dehydrogenase E1 component subunit alpha, somatic form, mitochondrial precursor | 6  | 9  | 15 | 30  | -0.07   | 1   | 2   | 3   | 6   | -0.05   |  |
| 18152793  | Pdhb    | pyruvate dehydrogenase E1 component subunit beta, mitochondrial precursor                | 20 | 14 | 19 | 53  | -0.10   | 3   | 7   | 7   | 17  | -0.13   |  |
| 226958643 | Pdk2    | pyruvate dehydrogenase kinase, isoenzyme 2 precursor                                     | 1  | 2  | 2  | 5   | -0.13 * | 0   | 0   | 1   | 1   | -0.10   |  |
| 110625975 | Pdk1    | pyruvate dehydrogenase kinase, isozyme 1 precursor                                       | 11 | 13 | 18 | 42  | -0.11 * | 3   | 11  | 20  | 34  | -0.61 # |  |
| 21704122  | Pdk3    | pyruvate dehydrogenase kinase, isozyme 3 precursor                                       | 8  | 15 | 15 | 38  | -0.22   | 0   | 4   | 8   | 12  | -0.06   |  |
| 28201978  | Pdhx    | pyruvate dehydrogenase protein X component, mitochondrial                                | 6  | 1  | 8  | 15  | -0.04   | 0   | 0   | 1   | 1   | -0.01   |  |
| 31981562  | Pkm2    | pyruvate kinase isozymes M1/M2                                                           | 47 | 31 | 58 | 136 | -0.01   | 56  | 71  | 106 | 233 | 0.06    |  |
| 33859560  | Gdi1    | rab GDP dissociation inhibitor alpha                                                     | 0  | 0  | 0  | 0   |         | 0   | 0   | 5   | 5   | 0.19    |  |
| 116089273 | Gdi2    | rab GDP dissociation inhibitor beta                                                      | 15 | 14 | 29 | 58  | -0.01   | 3   | 7   | 27  | 37  | 0.23    |  |
| 146134336 | Rabl2   | RAB, member of RAS oncogene family-like 2A                                               | 0  | 0  | 0  | 0   |         | 0   | 0   | 2   | 2   | -0.39   |  |

|           |               |                                                           |    |    |    |     |       |     |    |    |     |     |       |     |
|-----------|---------------|-----------------------------------------------------------|----|----|----|-----|-------|-----|----|----|-----|-----|-------|-----|
| 51556219  | Rab3ip        | rab-3A-interacting protein                                | 1  | 0  | 1  | 2   | -0.67 | #   | 0  | 0  | 0   | 0   |       |     |
| 21313026  | Rabl5         | rab-like protein 5                                        | 0  | 0  | 0  | 0   |       |     | 0  | 0  | 1   | 1   | -0.01 |     |
| 6755266   | Racgap1       | rac GTPase-activating protein 1                           | 0  | 0  | 0  | 0   |       |     | 0  | 1  | 1   | 2   | 0.22  |     |
| 157277948 | Rdx           | radixin isoform a                                         | 14 | 18 | 38 | 70  | 0.16  |     | 0  | 3  | 5   | 8   | 0.04  |     |
| 157277952 | Rdx           | radixin isoform b                                         | 0  | 0  | 0  | 0   |       |     | 0  | 1  | 0   | 1   | 2.59  | #   |
| 242332593 | Z400001E08Rik | regulator complex protein LAMTOR1                         | 1  | 0  | 0  | 1   | 0.02  |     | 0  | 0  | 0   | 0   |       |     |
| 13752573  | Lamtor2       | regulator complex protein LAMTOR2                         | 3  | 0  | 2  | 5   | -0.69 | #   | 0  | 0  | 0   | 0   |       |     |
| 9910452   | Lamtor3       | regulator complex protein LAMTOR3                         | 2  | 0  | 0  | 2   | 0.37  |     | 0  | 0  | 0   | 0   |       |     |
| 163310721 | Ralgapa1      | ral GTPase-activating protein subunit alpha-1 isoform 2   | 0  | 2  | 0  | 2   | 0.29  |     | 0  | 0  | 0   | 0   |       |     |
| 158187505 | Ralgapa2      | ral GTPase-activating protein subunit alpha-2             | 0  | 1  | 1  | 2   | 0.97  | #   | 0  | 0  | 0   | 0   |       |     |
| 124487299 | Ralgapb       | ral GTPase-activating protein subunit beta                | 5  | 4  | 6  | 15  | 0.38  | *   | 0  | 0  | 0   | 0   |       |     |
| 31982627  | Rgl3          | ral guanine nucleotide dissociation stimulator-like 3     | 0  | 0  | 0  | 0   |       |     | 0  | 2  | 1   | 3   | -0.56 | #   |
| 226062635 | Rangap1       | ran GTPase-activating protein 1                           | 12 | 17 | 7  | 36  | 0.68  | *,# | 2  | 5  | 1   | 8   | 0.54  | *,# |
| 83523744  | Ranbp3        | ran-binding protein 3                                     | 0  | 0  | 0  | 0   |       |     | 1  | 1  | 7   | 9   | -0.14 |     |
| 53850664  | Ranbp6        | ran-binding protein 6                                     | 0  | 0  | 0  | 0   |       |     | 0  | 0  | 2   | 2   | 0.39  |     |
| 153792001 | Ranbp1        | ran-specific GTPase-activating protein                    | 3  | 8  | 4  | 15  | -0.01 |     | 1  | 2  | 5   | 8   | -0.04 |     |
| 62945396  | Rasef         | ras and EF-hand domain-containing protein homolog         | 0  | 1  | 1  | 2   | 0.07  |     | 0  | 0  | 1   | 1   | -1.51 | #   |
| 7305075   | G3bp1         | ras GTPase-activating protein-binding protein 1           | 23 | 16 | 16 | 55  | -0.34 |     | 0  | 3  | 5   | 8   | -0.35 |     |
| 124248575 | G3bp2         | ras GTPase-activating protein-binding protein 2 isoform b | 8  | 8  | 3  | 19  | -0.15 |     | 0  | 0  | 0   | 0   |       |     |
| 242332572 | Iqgap1        | ras GTPase-activating-like protein IQGAP1                 | 29 | 22 | 26 | 77  | -0.06 |     | 5  | 16 | 111 | 132 | 0.24  |     |
| 31982028  | Rsu1          | ras suppressor protein 1                                  | 8  | 9  | 8  | 25  | -0.20 |     | 0  | 3  | 6   | 9   | 0.15  |     |
| 45592934  | Rac1          | ras-related C3 botulinum toxin substrate 1 precursor      | 9  | 12 | 4  | 25  | 0.01  |     | 1  | 9  | 5   | 15  | 0.29  |     |
| 7710086   | Rab10         | ras-related protein Rab-10                                | 22 | 13 | 11 | 46  | -0.12 |     | 35 | 12 | 9   | 56  | -0.10 |     |
| 31980840  | Rab11a        | ras-related protein Rab-11A                               | 0  | 14 | 0  | 14  | 0.56  |     | 3  | 8  | 0   | 11  | 0.43  |     |
| 6679583   | Rab11b        | ras-related protein Rab-11B                               | 13 | 0  | 11 | 24  | -0.37 |     | 0  | 0  | 7   | 7   | 0.11  |     |
| 106507168 | Rab12         | ras-related protein Rab-12                                | 3  | 1  | 0  | 4   | 0.37  |     | 0  | 0  | 0   | 0   |       |     |
| 21311975  | Rab13         | ras-related protein Rab-13                                | 3  | 7  | 1  | 11  | -0.05 |     | 0  | 4  | 1   | 5   | 0.04  |     |
| 18390323  | Rab14         | ras-related protein Rab-14                                | 17 | 11 | 10 | 38  | -0.10 |     | 6  | 10 | 8   | 24  | -0.19 | *   |
| 30841008  | Rab18         | ras-related protein Rab-18                                | 7  | 2  | 4  | 13  | -0.15 |     | 2  | 1  | 4   | 7   | -0.21 |     |
| 6679587   | Rab1          | ras-related protein Rab-1A                                | 12 | 6  | 12 | 30  | -0.38 |     | 31 | 12 | 16  | 59  | -0.20 |     |
| 21313162  | Rab1b         | ras-related protein Rab-1B                                | 14 | 8  | 13 | 35  | -0.20 | *   | 24 | 11 | 13  | 48  | -0.16 |     |
| 33859751  | Rab21         | ras-related protein Rab-21                                | 8  | 7  | 5  | 20  | -0.24 |     | 1  | 2  | 1   | 4   | -0.36 |     |
| 148747177 | Rab22a        | ras-related protein Rab-22A                               | 0  | 1  | 1  | 2   | 0.06  | *   | 0  | 0  | 0   | 0   |       |     |
| 31980838  | Rab25         | ras-related protein Rab-25                                | 6  | 4  | 3  | 13  | 0.11  |     | 0  | 8  | 3   | 11  | 0.24  |     |
| 10946940  | Rab2a         | ras-related protein Rab-2A                                | 13 | 4  | 4  | 21  | -0.27 |     | 2  | 3  | 7   | 12  | -0.09 |     |
| 37718983  | Rab35         | ras-related protein Rab-35                                | 14 | 18 | 12 | 44  | 0.16  |     | 9  | 13 | 7   | 29  | -0.05 |     |
| 15042957  | Rab3d         | ras-related protein Rab-3D                                | 4  | 0  | 0  | 4   | 0.00  |     | 0  | 0  | 0   | 0   |       |     |
| 13385374  | Rab5a         | ras-related protein Rab-5A                                | 10 | 20 | 17 | 47  | -0.18 | *   | 4  | 17 | 15  | 36  | -0.09 |     |
| 28916687  | Rab5b         | ras-related protein Rab-5B isoform 1                      | 7  | 11 | 15 | 33  | -0.19 |     | 0  | 11 | 11  | 22  | 0.02  |     |
| 113866024 | Rab5c         | ras-related protein Rab-5C                                | 31 | 35 | 38 | 104 | -0.25 |     | 18 | 29 | 21  | 68  | -0.06 |     |
| 13195674  | Rab6          | ras-related protein Rab-6A isoform 2                      | 11 | 6  | 2  | 19  | -0.16 |     | 3  | 7  | 5   | 15  | 0.04  |     |
| 148747526 | Rab7          | ras-related protein Rab-7a                                | 16 | 12 | 14 | 42  | -0.13 |     | 21 | 8  | 8   | 37  | -0.11 |     |
| 38372905  | Rab8a         | ras-related protein Rab-8A                                | 17 | 15 | 17 | 49  | -0.18 | *   | 11 | 10 | 17  | 38  | -0.05 |     |
| 27734154  | Rab8b         | ras-related protein Rab-8B                                | 4  | 7  | 4  | 15  | 0.01  |     | 0  | 4  | 3   | 7   | -0.04 |     |
| 34328471  | Rala          | ras-related protein Ral-A precursor                       | 7  | 11 | 9  | 27  | -0.32 |     | 0  | 7  | 6   | 13  | -0.18 |     |
| 11612509  | Ralb          | ras-related protein Ral-B precursor                       | 9  | 17 | 8  | 34  | -0.47 |     | 0  | 10 | 3   | 13  | -0.38 |     |
| 21704066  | Rap1a         | ras-related protein Rap-1A precursor                      | 9  | 14 | 12 | 35  | -0.67 | *,# | 10 | 13 | 13  | 36  | -0.53 | *,# |
| 33859753  | Rap1b         | ras-related protein Rap-1b precursor                      | 9  | 10 | 13 | 32  | -0.83 | *,# | 8  | 0  | 12  | 20  | -0.59 | #   |
| 13386338  | Rap2b         | ras-related protein Rap-2b precursor                      | 0  | 0  | 1  | 1   | -0.13 |     | 0  | 0  | 1   | 1   | 0.39  |     |
| 6677819   | Rras          | ras-related protein R-Ras precursor                       | 1  | 1  | 4  | 6   | -0.10 |     | 0  | 2  | 3   | 5   | -0.12 |     |
| 165972315 | Rras2         | ras-related protein R-Ras2 precursor                      | 1  | 3  | 3  | 7   | 0.21  |     | 0  | 3  | 2   | 5   | 0.07  |     |

|           |               |                                                                                   |    |    |    |     |         |    |    |    |     |         |  |
|-----------|---------------|-----------------------------------------------------------------------------------|----|----|----|-----|---------|----|----|----|-----|---------|--|
| 295424113 | Rreb1         | ras-responsive element-binding protein 1 isoform 1                                | 0  | 1  | 0  | 1   | -1.75#  | 0  | 0  | 0  | 0   |         |  |
| 295424118 | Rreb1         | ras-responsive element-binding protein 1 isoform 2                                | 0  | 2  | 1  | 3   | 0.20    | 0  | 0  | 0  | 0   |         |  |
| 254675343 | Rest          | RE1-silencing transcription factor                                                | 7  | 7  | 0  | 14  | 0.22    | 0  | 0  | 5  | 5   | -0.18   |  |
| 30519927  | Reep3         | receptor expression-enhancing protein 3 isoform 2                                 | 5  | 2  | 7  | 14  | 0.00    | 0  | 0  | 0  | 0   |         |  |
| 30725847  | Reep4         | receptor expression-enhancing protein 4                                           | 2  | 2  | 0  | 4   | -0.06   | 0  | 1  | 0  | 1   | -0.12   |  |
| 161016826 | Reep5         | receptor expression-enhancing protein 5                                           | 2  | 0  | 0  | 2   | -0.34   | 0  | 0  | 0  | 0   |         |  |
| 21314830  | Reep6         | receptor expression-enhancing protein 6 isoform 1                                 | 6  | 2  | 2  | 10  | -0.10   | 0  | 0  | 0  | 0   |         |  |
| 87162480  | 4933421E11Rik | receptor-interacting factor 1 isoform 2                                           | 1  | 0  | 0  | 1   | -0.31   | 0  | 4  | 5  | 9   | 0.07    |  |
| 115648048 | Ptprf         | receptor-type tyrosine-protein phosphatase F precursor                            | 0  | 0  | 1  | 1   | -0.45   | 0  | 0  | 0  | 0   |         |  |
| 124286785 | Rbpj          | recombining binding protein suppressor of hairless isoform 3                      | 10 | 17 | 4  | 31  | -0.19   | 0  | 2  | 0  | 2   | 0.06    |  |
| 21450083  | Rprd1a        | regulation of nuclear pre-mRNA domain-containing protein 1A                       | 5  | 0  | 6  | 11  | -0.14   | 0  | 7  | 14 | 21  | 0.12    |  |
| 34328077  | Rprd1b        | regulation of nuclear pre-mRNA domain-containing protein 1B                       | 14 | 25 | 22 | 61  | 0.11    | 18 | 42 | 46 | 106 | 0.09    |  |
| 124486841 | Rprd2         | regulation of nuclear pre-mRNA domain-containing protein 2                        | 7  | 9  | 6  | 22  | 0.29    | 13 | 22 | 20 | 55  | 0.07    |  |
| 19527092  | Rcc1          | regulator of chromosome condensation isoform 2                                    | 28 | 43 | 24 | 95  | 0.02    | 48 | 44 | 43 | 135 | -0.09*  |  |
| 30039680  | Rod1          | regulator of differentiation 1 isoform 2                                          | 56 | 69 | 65 | 190 | -0.04   | 28 | 62 | 52 | 142 | -0.04   |  |
| 31560255  | Fam82b        | regulator of microtubule dynamics protein 1                                       | 3  | 1  | 0  | 4   | -0.18   | 0  | 0  | 0  | 0   |         |  |
| 85701644  | Fam82a2       | regulator of microtubule dynamics protein 3                                       | 0  | 0  | 0  | 0   |         | 0  | 0  | 1  | 1   | 0.79#   |  |
| 170784811 | Upf1          | regulator of nonsense transcripts 1 isoform b                                     | 0  | 0  | 0  | 0   |         | 0  | 0  | 3  | 3   | -0.47#  |  |
| 71037397  | Rfx5          | regulatory factor X, 5                                                            | 0  | 4  | 4  | 8   | -0.05   | 0  | 0  | 0  | 0   |         |  |
| 18875392  | Rfxap         | regulatory factor X-associated protein                                            | 2  | 1  | 1  | 4   | 0.32    | 0  | 0  | 0  | 0   |         |  |
| 124486905 | Rsf1          | remodeling and spacing factor 1                                                   | 0  | 0  | 1  | 1   | 0.12    | 49 | 71 | 94 | 214 | -0.05   |  |
| 21361250  | Atp6ap2       | renin receptor precursor                                                          | 0  | 1  | 1  | 2   | -0.78#  | 0  | 0  | 0  | 0   |         |  |
| 188219597 | Rfc1          | replication factor C subunit 1                                                    | 42 | 40 | 20 | 102 | 0.08    | 6  | 11 | 18 | 35  | 0.10    |  |
| 11177922  | Rfc2          | replication factor C subunit 2                                                    | 29 | 25 | 15 | 69  | -0.18   | 2  | 11 | 14 | 27  | -0.13   |  |
| 124249204 | Rfc3          | replication factor C subunit 3                                                    | 24 | 25 | 8  | 57  | 0.00    | 16 | 13 | 28 | 57  | -0.02   |  |
| 21703948  | Rfc4          | replication factor C subunit 4                                                    | 20 | 18 | 10 | 48  | 0.06    | 1  | 9  | 8  | 18  | 0.04    |  |
| 110625924 | Rfc5          | replication factor C subunit 5                                                    | 27 | 33 | 18 | 78  | -0.02   | 15 | 26 | 28 | 69  | -0.02   |  |
| 13386122  | Rpa3          | replication protein A 14 kDa subunit                                              | 5  | 0  | 5  | 10  | 0.06    | 0  | 0  | 0  | 0   |         |  |
| 110625961 | Rpa2          | replication protein A 32 kDa subunit                                              | 0  | 1  | 0  | 1   | -0.30   | 0  | 0  | 0  | 0   |         |  |
| 39930559  | Rcor1         | REST corepressor 1                                                                | 19 | 25 | 17 | 61  | 0.18    | 7  | 21 | 10 | 38  | 0.23*   |  |
| 114205428 | Rcn2          | reticulocalbin-2 precursor                                                        | 0  | 0  | 0  | 0   |         | 0  | 0  | 1  | 1   | -0.22   |  |
| 16716353  | Rtn3          | reticulon-3 isoform 4                                                             | 5  | 4  | 2  | 11  | -0.04   | 1  | 1  | 0  | 2   | -0.17   |  |
| 34610233  | Rtn4          | reticulon-4 isoform B1                                                            | 10 | 0  | 0  | 10  | -0.19   | 0  | 0  | 0  | 0   |         |  |
| 34610237  | Rtn4          | reticulon-4 isoform D                                                             | 0  | 0  | 1  | 1   | 0.26    | 0  | 0  | 0  | 0   |         |  |
| 6679245   | Pde6d         | retinal rod rhodopsin-sensitive cGMP 3',5'-cyclic phosphodiesterase subunit delta | 0  | 1  | 0  | 1   | -0.02   | 0  | 0  | 0  | 0   |         |  |
| 9055300   | Rp9           | retinitis pigmentosa 9 protein homolog                                            | 0  | 1  | 1  | 2   | 0.02    | 0  | 0  | 0  | 0   |         |  |
| 164450487 | Rbbp5         | retinoblastoma-binding protein 5                                                  | 8  | 14 | 3  | 25  | 0.20    | 1  | 3  | 0  | 4   | 0.37    |  |
| 112181202 | Rarg          | retinoic acid receptor gamma isoform 1                                            | 0  | 1  | 0  | 1   | -0.06   | 0  | 0  | 0  | 0   |         |  |
| 112181196 | Rarg          | retinoic acid receptor gamma isoform 2                                            | 3  | 0  | 2  | 5   | 0.04    | 0  | 0  | 0  | 0   |         |  |
| 6755384   | Rxra          | retinoic acid receptor RXR-alpha                                                  | 4  | 8  | 8  | 20  | 0.07    | 0  | 0  | 0  | 0   |         |  |
| 83649745  | Rai1          | retinoic acid-induced protein 1                                                   | 0  | 0  | 0  | 0   |         | 0  | 1  | 0  | 1   | -0.07   |  |
| 225543465 | Gprc5a        | retinoic acid-induced protein 3                                                   | 1  | 8  | 2  | 11  | 0.60*,# | 17 | 33 | 17 | 67  | 0.62*,# |  |
| 253970508 | Scpep1        | retinoid-inducible serine carboxypeptidase precursor                              | 5  | 3  | 4  | 12  | -0.06   | 0  | 0  | 1  | 1   | 0.03    |  |
| 19482172  | Rdh11         | retinol dehydrogenase 11                                                          | 4  | 0  | 0  | 4   | -0.23   | 0  | 2  | 0  | 2   | -0.73#  |  |

|           |           |                                                        |    |    |    |     |       |   |     |     |     |       |        |   |
|-----------|-----------|--------------------------------------------------------|----|----|----|-----|-------|---|-----|-----|-----|-------|--------|---|
| 58037513  | Rdh12     | retinol dehydrogenase 12                               | 0  | 0  | 1  | 1   | 0.21  | 0 | 3   | 0   | 3   | -0.36 |        |   |
| 30425078  | Rdh13     | retinol dehydrogenase 13                               | 1  | 0  | 0  | 1   | -0.09 | 3 | 4   | 7   | 14  | 0.64  | #      |   |
| 31982030  | Arhgdia   | rho GDP-dissociation inhibitor 1                       | 5  | 5  | 6  | 16  | 0.02  | 1 | 10  | 16  | 27  | -0.09 |        |   |
| 225543420 | Arhgap1   | rho GTPase-activating protein 1 isoform 2              | 0  | 0  | 0  | 0   |       | 0 | 1   | 0   | 1   | 0.21  |        |   |
| 100818170 | Arhgap11a | rho GTPase-activating protein 11A                      | 0  | 0  | 0  | 0   |       | 0 | 0   | 2   | 2   | 0.00  |        |   |
| 169790947 | Arhgap17  | rho GTPase-activating protein 17 isoform e             | 0  | 1  | 0  | 1   | -0.05 | 0 | 0   | 0   | 0   |       |        |   |
| 86262151  | Arhgap5   | rho GTPase-activating protein 5                        | 0  | 3  | 3  | 6   | 0.45  | 0 | 0   | 0   | 0   |       |        |   |
| 257467504 | Arhgap8   | rho GTPase-activating protein 8                        | 0  | 0  | 1  | 1   | -0.32 | 0 | 0   | 0   | 0   |       |        |   |
| 312032462 | Arhgef2   | rho guanine nucleotide exchange factor 2 isoform 4     | 2  | 7  | 5  | 14  | -0.27 | 0 | 1   | 4   | 5   | -0.10 |        |   |
| 6677759   | Rock1     | rho-associated protein kinase 1                        | 0  | 2  | 2  | 4   | 0.98  | # | 0   | 0   | 0   | 0     |        |   |
| 134949013 | Rock2     | rho-associated protein kinase 2                        | 5  | 13 | 11 | 29  | 0.28  |   | 0   | 0   | 0   | 0     |        |   |
| 170014732 | Rhbdd1    | rhomboid domain-containing protein 1                   | 0  | 1  | 0  | 1   | -0.69 | # | 0   | 4   | 4   | 8     | -0.05  |   |
| 160415213 | Rhoc      | rho-related GTP-binding protein RhoC precursor         | 0  | 5  | 0  | 5   | -0.15 |   | 0   | 5   | 9   | 14    | -0.32  |   |
| 9625037   | Rhog      | rho-related GTP-binding protein RhoG precursor         | 2  | 1  | 1  | 4   | -1.21 | # | 0   | 0   | 1   | 1     | -0.68  | # |
| 226246542 | Rnaseh1   | ribonuclease H1                                        | 1  | 0  | 0  | 1   | -0.10 |   | 0   | 0   | 0   | 0     |        |   |
| 58037175  | Rnaseh2a  | ribonuclease H2 subunit A                              | 5  | 5  | 5  | 15  | 0.13  |   | 0   | 1   | 2   | 3     | 0.44   |   |
| 58037097  | Rnaseh2b  | ribonuclease H2 subunit B                              | 4  | 7  | 2  | 13  | 0.05  |   | 0   | 0   | 0   | 0     |        |   |
| 13386102  | Rnaseh2c  | ribonuclease H2 subunit C                              | 4  | 3  | 2  | 9   | 0.15  |   | 0   | 0   | 0   | 0     |        |   |
| 13385432  | Rpp14     | ribonuclease P protein subunit p14                     | 6  | 1  | 8  | 15  | 0.25  |   | 0   | 0   | 0   | 0     |        |   |
| 13899215  | Pop7      | ribonuclease P protein subunit p20                     | 1  | 2  | 1  | 4   | -0.23 |   | 0   | 0   | 0   | 0     |        |   |
| 13384772  | Pop4      | ribonuclease P protein subunit p29                     | 4  | 5  | 4  | 13  | 0.26  | * | 0   | 0   | 0   | 0     |        |   |
| 257196209 | Rpp30     | ribonuclease P protein subunit p30                     | 19 | 36 | 19 | 74  | 0.00  |   | 0   | 2   | 2   | 4     | 0.17   |   |
| 247300905 | Rpp38     | ribonuclease P protein subunit p38                     | 0  | 1  | 1  | 2   | 0.18  |   | 0   | 0   | 0   | 0     |        |   |
| 20270200  | Pop5      | ribonuclease P/MRP protein subunit POP5                | 5  | 4  | 5  | 14  | 0.19  |   | 0   | 0   | 0   | 0     |        |   |
| 40807498  | Hrsp12    | ribonuclease UK114                                     | 6  | 0  | 5  | 11  | -0.35 |   | 0   | 0   | 0   | 0     |        |   |
| 29789209  | Raver1    | ribonucleoprotein PTB-binding 1                        | 73 | 74 | 36 | 183 | 0.08  |   | 28  | 30  | 48  | 106   | 0.16   |   |
| 7106399   | Rrm2      | ribonucleoside-diphosphate reductase subunit M2        | 0  | 0  | 0  | 0   |       |   | 1   | 0   | 0   | 1     | -10.02 | # |
| 10946854  | Prps1     | ribose-phosphate pyrophosphokinase 1                   | 0  | 3  | 0  | 3   | 0.42  |   | 0   | 1   | 0   | 1     | 0.32   |   |
| 30794470  | Rsl1d1    | ribosomal L1 domain-containing protein 1               | 19 | 14 | 9  | 42  | -0.17 |   | 176 | 112 | 148 | 436   | 0.04   |   |
| 13385888  | Mrp63     | ribosomal protein 63, mitochondrial                    | 1  | 0  | 0  | 1   | -0.53 |   | 0   | 0   | 0   | 0     |        |   |
| 295842468 | Gm10136   | ribosomal protein L26-like                             | 0  | 0  | 0  | 0   |       |   | 0   | 3   | 0   | 3     | 0.00   |   |
| 13385038  | Rpl36a1   | ribosomal protein L36A-like                            | 0  | 1  | 0  | 1   | -0.17 |   | 0   | 0   | 0   | 0     |        |   |
| 158636007 | Rps6ka1   | ribosomal protein S6 kinase alpha-1                    | 0  | 0  | 0  | 0   |       |   | 0   | 2   | 2   | 4     | -0.16  |   |
| 22507357  | Rps6ka3   | ribosomal protein S6 kinase alpha-3                    | 0  | 0  | 0  | 0   |       |   | 0   | 1   | 2   | 3     | -0.26  |   |
| 9910454   | Rps6ka4   | ribosomal protein S6 kinase alpha-4                    | 0  | 0  | 0  | 0   |       |   | 0   | 0   | 1   | 1     | 0.07   |   |
| 117676367 | Rrp1      | ribosomal RNA processing protein 1 homolog A           | 0  | 0  | 1  | 1   | -0.45 |   | 13  | 12  | 11  | 36    | 0.25   |   |
| 254911011 | Rrp1b     | ribosomal RNA processing protein 1 homolog B isoform 2 | 0  | 6  | 3  | 9   | -0.23 |   | 1   | 5   | 14  | 20    | 0.00   |   |
| 21450075  | Rrp36     | ribosomal RNA processing protein 36 homolog            | 0  | 0  | 0  | 0   |       |   | 0   | 4   | 14  | 18    | 0.05   |   |
| 7305109   | Emg1      | ribosomal RNA small subunit methyltransferase NEP1     | 32 | 34 | 33 | 99  | -0.16 | * | 13  | 36  | 22  | 71    | -0.07  |   |
| 257467556 | Rrp7a     | ribosomal RNA-processing protein 7 homolog A           | 9  | 9  | 6  | 24  | -0.36 |   | 5   | 8   | 13  | 26    | -0.01  |   |
| 20270198  | Rrp8      | ribosomal RNA-processing protein 8 isoform 2           | 0  | 0  | 0  | 0   |       |   | 0   | 2   | 2   | 4     | 0.17   |   |
| 39930555  | Bms1      | ribosome biogenesis protein BMS1 homolog               | 7  | 9  | 6  | 22  | -0.06 |   | 4   | 42  | 57  | 103   | 0.32   |   |
| 7304931   | Bop1      | ribosome biogenesis protein BOP1                       | 0  | 0  | 0  | 0   |       |   | 7   | 37  | 56  | 100   | 0.01   |   |
| 141802630 | Brix1     | ribosome biogenesis protein BRX1 homolog               | 0  | 0  | 0  | 0   |       |   | 8   | 24  | 5   | 37    | 0.25   |   |
| 149270710 | Gm5515    | ribosome biogenesis protein NSA2 homolog               | 0  | 0  | 0  | 0   |       |   | 1   | 6   | 6   | 13    | 0.13   |   |

|           |               |                                                                    |    |     |    |     |          |  |  |     |     |     |     |         |
|-----------|---------------|--------------------------------------------------------------------|----|-----|----|-----|----------|--|--|-----|-----|-----|-----|---------|
| 10946614  | Wdr12         | ribosome biogenesis protein WDR12                                  | 0  | 0   | 0  | 0   |          |  |  | 2   | 26  | 29  | 57  | 0.13    |
| 227908779 | Rrs1          | ribosome biogenesis regulatory protein homolog                     | 0  | 0   | 0  | 0   |          |  |  | 3   | 6   | 6   | 15  | 0.08    |
| 23956138  | Sbds          | ribosome maturation protein SBDS                                   | 14 | 18  | 15 | 47  | -0.01    |  |  | 0   | 1   | 1   | 2   | 0.17    |
| 169790907 | Rpf1          | ribosome production factor 1 isoform 2                             | 0  | 0   | 0  | 0   |          |  |  | 0   | 1   | 8   | 9   | -0.02   |
| 110347521 | Rpf2          | ribosome production factor 2 homolog isoform 2                     | 0  | 0   | 0  | 0   |          |  |  | 8   | 29  | 25  | 62  | 0.05    |
| 124486712 | Rrbp1         | ribosome-binding protein 1 isoform a                               | 2  | 22  | 7  | 31  | -0.01    |  |  | 0   | 1   | 0   | 1   | 0.39    |
| 19482168  | Rrbp1         | ribosome-binding protein 1 isoform b                               | 7  | 0   | 7  | 14  | 0.12     |  |  | 0   | 0   | 0   | 0   |         |
| 21312752  | Mrrf          | ribosome-recycling factor, mitochondrial precursor                 | 44 | 53  | 47 | 144 | -0.10    |  |  | 0   | 18  | 13  | 31  | -0.04   |
| 19526956  | 2900064A13Rik | RIKEN cDNA 2900064A13 precursor                                    | 5  | 8   | 5  | 18  | -0.30    |  |  | 0   | 0   | 0   | 0   |         |
| 61742810  | Zc3h13        | RIKEN cDNA 3110050K21                                              | 3  | 3   | 8  | 14  | 0.41 *   |  |  | 0   | 1   | 0   | 1   | 0.24    |
| 21362321  | Rnf126        | RING finger protein 126                                            | 0  | 0   | 1  | 1   | -0.09    |  |  | 0   | 3   | 7   | 10  | 0.03    |
| 38348308  | Rybp          | RING1 and YY1-binding protein                                      | 11 | 13  | 11 | 35  | 0.05     |  |  | 0   | 2   | 2   | 4   | 0.12    |
| 254587958 | Rtcd1         | RNA 3'-terminal phosphate cyclase                                  | 0  | 0   | 0  | 0   |          |  |  | 0   | 1   | 2   | 3   | -0.25   |
| 10946950  | Rcl1          | RNA 3'-terminal phosphate cyclase-like protein                     | 5  | 4   | 3  | 12  | -0.26    |  |  | 6   | 14  | 13  | 33  | -0.01   |
| 148238335 | Refbp2        | RNA and export factor-binding protein 2                            | 2  | 0   | 0  | 2   | -0.14    |  |  | 0   | 0   | 0   | 0   |         |
| 262527218 | Gm15455       | RNA binding motif protein 10-like                                  | 0  | 0   | 0  | 0   |          |  |  | 0   | 0   | 2   | 2   | -0.58 # |
| 124249066 | Rbm15         | RNA binding motif protein 15                                       | 27 | 36  | 25 | 88  | 0.03     |  |  | 10  | 14  | 12  | 36  | 0.11    |
| 161016811 | Rbfox2        | RNA binding protein fox-1 homolog 2 isoform 3                      | 0  | 0   | 0  | 0   |          |  |  | 0   | 6   | 7   | 13  | 0.17    |
| 76563952  | Rexo4         | RNA exonuclease 4                                                  | 0  | 1   | 0  | 1   | -0.09    |  |  | 0   | 1   | 3   | 4   | 0.29    |
| 172088095 | Ssu72         | RNA polymerase II subunit A C-terminal domain phosphatase SSU72    | 3  | 5   | 6  | 14  | -0.11    |  |  | 0   | 0   | 0   | 0   |         |
| 31980912  | Paf1          | RNA polymerase II-associated factor 1 homolog                      | 19 | 24  | 11 | 54  | -0.03    |  |  | 3   | 8   | 5   | 16  | -0.03   |
| 154090953 | Ctr9          | RNA polymerase-associated protein CTR9 homolog                     | 36 | 38  | 37 | 111 | 0.02     |  |  | 0   | 10  | 3   | 13  | 0.00    |
| 87299619  | Leo1          | RNA polymerase-associated protein LEO1                             | 7  | 6   | 4  | 17  | 0.29     |  |  | 0   | 2   | 1   | 3   | 0.35    |
| 27734072  | RbmX2         | RNA-binding motif protein, X-linked 2                              | 3  | 4   | 7  | 14  | -0.02    |  |  | 6   | 5   | 9   | 20  | -0.04 * |
| 213513185 | Rbms1         | RNA-binding motif, single-stranded-interacting protein 1 isoform 2 | 7  | 5   | 4  | 16  | -0.34 *  |  |  | 0   | 0   | 2   | 2   | 0.46 #  |
| 84872207  | Rbms2         | RNA-binding motif, single-stranded-interacting protein 2 isoform b | 3  | 2   | 4  | 9   | -0.43    |  |  | 0   | 3   | 7   | 10  | 0.01    |
| 287324984 | Rbms3         | RNA-binding motif, single-stranded-interacting protein 3 isoform 6 | 0  | 0   | 0  | 0   |          |  |  | 0   | 1   | 0   | 1   | 0.06    |
| 269847199 | Rbm10         | RNA-binding protein 10 isoform 3                                   | 9  | 8   | 5  | 22  | 0.03     |  |  | 3   | 10  | 5   | 18  | 0.07    |
| 86262142  | Rbm14         | RNA-binding protein 14                                             | 51 | 56  | 25 | 132 | -0.01    |  |  | 78  | 81  | 119 | 278 | 0.24 *  |
| 161353449 | Rbm25         | RNA-binding protein 25                                             | 48 | 61  | 57 | 166 | 0.08     |  |  | 16  | 50  | 44  | 110 | 0.14 *  |
| 123701991 | Rbm26         | RNA-binding protein 26                                             | 14 | 17  | 15 | 46  | 0.36 *   |  |  | 0   | 2   | 3   | 5   | 0.24    |
| 226958612 | Rbm27         | RNA-binding protein 27                                             | 0  | 2   | 0  | 2   | -0.18    |  |  | 0   | 0   | 0   | 0   |         |
| 166235127 | Rbm28         | RNA-binding protein 28                                             | 0  | 0   | 0  | 0   |          |  |  | 8   | 14  | 22  | 44  | 0.19    |
| 42794007  | Rbm34         | RNA-binding protein 34                                             | 0  | 0   | 0  | 0   |          |  |  | 0   | 6   | 14  | 20  | 0.10    |
| 134053933 | Rbm38         | RNA-binding protein 38                                             | 0  | 2   | 0  | 2   | 0.24     |  |  | 0   | 0   | 0   | 0   |         |
| 118403314 | Rbm39         | RNA-binding protein 39                                             | 71 | 125 | 45 | 241 | -0.11    |  |  | 109 | 125 | 117 | 351 | -0.07   |
| 86262144  | Rbm4          | RNA-binding protein 4                                              | 2  | 9   | 4  | 15  | 0.12     |  |  | 2   | 12  | 13  | 27  | 0.21    |
| 31981077  | Rnpc3         | RNA-binding protein 40                                             | 0  | 3   | 1  | 4   | 2.40 #   |  |  | 0   | 0   | 0   | 0   |         |
| 224922828 | Rbm42         | RNA-binding protein 42                                             | 21 | 21  | 16 | 58  | -0.15    |  |  | 0   | 6   | 5   | 11  | -0.25   |
| 23510273  | Rbm45         | RNA-binding protein 45                                             | 9  | 9   | 11 | 29  | -0.19    |  |  | 0   | 10  | 5   | 15  | -0.04   |
| 188497701 | Rbm47         | RNA-binding protein 47                                             | 34 | 45  | 28 | 107 | -0.17    |  |  | 4   | 25  | 11  | 40  | -0.10   |
| 27754120  | Rbm4b         | RNA-binding protein 4B                                             | 0  | 5   | 0  | 5   | -1.52 #  |  |  | 0   | 5   | 9   | 14  | 0.18    |
| 22507333  | Rbm5          | RNA-binding protein 5                                              | 10 | 15  | 9  | 34  | 0.04     |  |  | 2   | 15  | 14  | 31  | 0.08    |
| 27753952  | Rbm7          | RNA-binding protein 7                                              | 1  | 4   | 3  | 8   | 0.72 *,# |  |  | 0   | 1   | 0   | 1   | -0.24   |
| 162287294 | Rbm8a         | RNA-binding protein 8A isoform b                                   | 20 | 29  | 19 | 68  | 0.15     |  |  | 55  | 34  | 31  | 120 | 0.10    |
| 88853581  | Ewsr1         | RNA-binding protein EWS                                            | 41 | 40  | 15 | 96  | -0.01    |  |  | 10  | 7   | 7   | 24  | 0.15    |
| 20982845  | Fus           | RNA-binding protein FUS                                            | 67 | 84  | 46 | 197 | -0.08    |  |  | 56  | 56  | 53  | 165 | -0.02   |

|           |               |                                                               |    |    |    |     |         |     |     |     |     |         |
|-----------|---------------|---------------------------------------------------------------|----|----|----|-----|---------|-----|-----|-----|-----|---------|
| 17157989  | Msi2          | RNA-binding protein Musashi homolog 2                         | 30 | 23 | 24 | 77  | -0.26   | 46  | 36  | 48  | 130 | -0.08   |
| 13384846  | Pno1          | RNA-binding protein PNO1                                      | 6  | 6  | 10 | 22  | -0.17   | 5   | 11  | 20  | 36  | -0.08   |
| 213417799 | Raly          | RNA-binding protein Raly short isoform                        | 49 | 66 | 51 | 166 | -0.25   | 165 | 123 | 118 | 406 | -0.02   |
| 33342267  | Rbpms         | RNA-binding protein with multiple splicing isoform 1          | 0  | 53 | 36 | 89  | 0.01    | 6   | 23  | 17  | 46  | 0.11    |
| 111185959 | Rbpms         | RNA-binding protein with multiple splicing isoform 3          | 34 | 0  | 0  | 34  | 0.04    | 0   | 0   | 0   | 0   |         |
| 121674799 | Rnps1         | RNA-binding protein with serine-rich domain 1 isoform 2       | 5  | 13 | 8  | 26  | -0.36   | 50  | 48  | 41  | 139 | 0.00    |
| 225543191 | Crocc         | rootletin isoform 1                                           | 17 | 35 | 23 | 75  | 0.29    | 0   | 0   | 0   | 0   |         |
| 37704389  | Rttn          | rotatin                                                       | 1  | 0  | 0  | 1   | 8.73 #  | 0   | 0   | 0   | 0   |         |
| 67906201  | Rsb1          | round spermatid basic protein 1                               | 0  | 1  | 0  | 1   | -0.60 # | 0   | 0   | 0   | 0   |         |
| 149251501 | LOC100044829  | rRNA 2'-O-methyltransferase fibrillarin-like isoform 1        | 52 | 69 | 49 | 170 | -0.04   | 113 | 117 | 108 | 338 | 0.00    |
| 89337263  | Mrm1          | rRNA methyltransferase 1, mitochondrial precursor             | 0  | 0  | 1  | 1   | -0.72 # | 0   | 0   | 0   | 0   |         |
| 51921297  | Fbl1          | rRNA/tRNA 2'-O-methyltransferase fibrillarin-like protein 1   | 9  | 16 | 7  | 32  | -0.04   | 11  | 6   | 13  | 30  | -0.04   |
| 268607601 | Fcf1          | rRNA-processing protein FCF1 homolog                          | 7  | 7  | 2  | 16  | -0.26   | 14  | 11  | 10  | 35  | 0.08    |
| 21313442  | Utp23         | rRNA-processing protein UTP23 homolog                         | 0  | 0  | 0  | 0   |         | 0   | 3   | 5   | 8   | -0.07   |
| 40789092  | Rrp12         | RRP12-like protein                                            | 3  | 3  | 6  | 12  | -0.14   | 4   | 93  | 151 | 248 | -0.17   |
| 126362985 | Rrp15         | RRP15-like protein                                            | 0  | 0  | 0  | 0   |         | 0   | 1   | 2   | 3   | 0.20    |
| 9790083   | Ruvbl1        | ruvB-like 1                                                   | 67 | 68 | 57 | 192 | 0.20    | 54  | 78  | 48  | 180 | 0.03    |
| 6755382   | Ruvbl2        | ruvB-like 2                                                   | 46 | 58 | 50 | 154 | 0.22 *  | 22  | 73  | 33  | 128 | 0.06    |
| 226443099 | Srbd1         | S1 RNA-binding domain-containing protein 1                    | 7  | 15 | 9  | 31  | 0.09    | 0   | 6   | 4   | 10  | 0.20    |
| 21312760  | S100a16       | S100 calcium binding protein A16                              | 10 | 12 | 5  | 27  | 0.12    | 10  | 3   | 0   | 13  | 0.65 #  |
| 62243852  | Sltm          | SAFB-like transcription modulator isoform b                   | 37 | 43 | 35 | 115 | 0.08    | 8   | 25  | 27  | 60  | 0.06    |
| 228008310 | Ccdc101       | SAGA-associated factor 29 homolog                             | 6  | 10 | 5  | 21  | -0.02   | 0   | 0   | 0   | 0   |         |
| 213418055 | Samhd1        | SAM domain and HD domain-containing protein 1 isoform 1       | 0  | 0  | 2  | 2   | 0.36    | 0   | 0   | 0   | 0   |         |
| 213418079 | Samhd1        | SAM domain and HD domain-containing protein 1 isoform 2       | 1  | 2  | 0  | 3   | 0.25    | 0   | 0   | 0   | 0   |         |
| 13384730  | Sarnp         | SAP domain-containing ribonucleoprotein                       | 44 | 42 | 43 | 129 | -0.13 * | 30  | 19  | 21  | 70  | 0.01    |
| 31560336  | Sap30bp       | SAP30-binding protein                                         | 0  | 0  | 2  | 2   | 0.31    | 0   | 1   | 1   | 2   | 0.40    |
| 82885488  | LOC639905     | SAP30-binding protein-like                                    | 0  | 2  | 0  | 2   | 0.00    | 0   | 0   | 0   | 0   |         |
| 36031132  | Atp2a1        | sarcoplasmic/endoplasmic reticulum calcium ATPase 1           | 0  | 0  | 0  | 0   |         | 0   | 0   | 1   | 1   | -0.69 # |
| 6806903   | Atp2a2        | sarcoplasmic/endoplasmic reticulum calcium ATPase 2 isoform b | 6  | 0  | 1  | 7   | -0.49 * | 17  | 7   | 20  | 44  | -0.34 * |
| 254028159 | Safb          | scaffold attachment factor B                                  | 33 | 46 | 67 | 146 | 0.12    | 92  | 91  | 143 | 326 | 0.08    |
| 153945866 | Safb2         | scaffold attachment factor B2                                 | 32 | 45 | 77 | 154 | 0.23    | 69  | 73  | 127 | 269 | 0.12    |
| 21312256  | Dcps          | scavenger mRNA-decapping enzyme DcpS                          | 0  | 0  | 0  | 0   |         | 0   | 0   | 2   | 2   | 0.10    |
| 70909345  | Scel          | sciellin                                                      | 0  | 1  | 0  | 1   | 0.33    | 0   | 0   | 0   | 0   |         |
| 58037481  | Scfd1         | sec1 family domain-containing protein 1                       | 5  | 8  | 4  | 17  | -0.18   | 1   | 7   | 8   | 16  | -0.15   |
| 269954700 | Sec24c        | Sec24 related gene family, member C isoform 2                 | 0  | 2  | 0  | 2   | 0.71 #  | 0   | 0   | 0   | 0   |         |
| 156713463 | Sephs1        | selenide, water dikinase 1                                    | 7  | 15 | 10 | 32  | 0.18 *  | 0   | 3   | 5   | 8   | 0.18    |
| 22164798  | Selenbp1      | selenium-binding protein 1                                    | 0  | 0  | 3  | 3   | 0.22    | 0   | 3   | 1   | 4   | -0.23   |
| 12746442  | Eefsec        | selenocysteine-specific elongation factor                     | 0  | 1  | 0  | 1   | 4.29 #  | 0   | 0   | 0   | 0   |         |
| 82546883  | 2700094K13Rik | selenoprotein H                                               | 13 | 11 | 17 | 41  | -0.09   | 6   | 3   | 5   | 14  | -0.03   |
| 143770878 | 2810407C02Rik | selenoprotein T precursor                                     | 2  | 2  | 2  | 6   | -0.34   | 2   | 0   | 2   | 4   | -0.38   |
| 6677917   | Sepw1         | selenoprotein W                                               | 0  | 1  | 0  | 1   | 0.30    | 0   | 0   | 0   | 0   |         |
| 21450063  | Senp1         | sentrin-specific protease 1                                   | 0  | 0  | 0  | 0   |         | 0   | 0   | 3   | 3   | 0.37    |
| 254939659 | Senp3         | sentrin-specific protease 3                                   | 3  | 8  | 3  | 14  | 0.52 *  | 0   | 2   | 0   | 2   | 0.23    |
| 42734351  | Senp7         | sentrin-specific protease 7 isoform 1                         | 0  | 0  | 0  | 0   |         | 0   | 0   | 45  | 45  | -0.13   |
| 51593105  | Senp7         | sentrin-specific protease 7 isoform 2                         | 0  | 0  | 0  | 0   |         | 15  | 35  | 17  | 67  | -0.06   |

|           |               |                                                                   |    |    |    |     |         |  |     |    |    |     |         |
|-----------|---------------|-------------------------------------------------------------------|----|----|----|-----|---------|--|-----|----|----|-----|---------|
| 51593102  | Senp7         | sentrin-specific protease 7 isoform 4                             | 0  | 0  | 0  | 0   |         |  | 0   | 3  | 0  | 3   | -0.26   |
| 67906175  | Sept10        | septin-10 isoform 2                                               | 4  | 7  | 6  | 17  | 0.08    |  | 0   | 0  | 0  | 0   |         |
| 57634518  | Sept11        | septin-11                                                         | 25 | 29 | 39 | 93  | 0.12    |  | 0   | 12 | 6  | 18  | 0.15    |
| 6754816   | Sept2         | septin-2 a                                                        | 32 | 33 | 35 | 100 | 0.15    |  | 0   | 21 | 14 | 35  | 0.14    |
| 228480253 | Sept2         | septin-2 b                                                        | 0  | 0  | 0  | 0   |         |  | 7   | 1  | 4  | 12  | 0.31    |
| 6755120   | Sept4         | septin-4                                                          | 2  | 1  | 2  | 5   | 0.04    |  | 0   | 0  | 0  | 0   |         |
| 158508501 | Sept5         | septin-5                                                          | 1  | 4  | 10 | 15  | 0.31    |  | 0   | 0  | 0  | 0   |         |
| 293597551 | Sept6         | septin-6 isoform 3                                                | 0  | 6  | 11 | 17  | 0.03    |  | 0   | 3  | 0  | 3   | 0.43    |
| 28173550  | Sept7         | septin-7 isoform 1                                                | 43 | 52 | 52 | 147 | 0.18    |  | 0   | 7  | 8  | 15  | 0.12    |
| 39930477  | Sept8         | septin-8                                                          | 17 | 18 | 16 | 51  | 0.13    |  | 0   | 6  | 1  | 7   | 0.14    |
| 164698481 | Sept9         | septin-9 isoform b                                                | 46 | 66 | 45 | 157 | 0.26    |  | 5   | 8  | 10 | 23  | 0.34    |
| 13507666  | Lactb         | serine beta-lactamase-like protein LACTB, mitochondrial precursor | 4  | 6  | 1  | 11  | -0.28   |  | 0   | 0  | 0  | 0   |         |
| 13443008  | Serhl         | serine hydrolase-like protein                                     | 2  | 0  | 1  | 3   | -0.31   |  | 0   | 0  | 0  | 0   |         |
| 21312298  | Shmt2         | serine hydroxymethyltransferase, mitochondrial                    | 39 | 52 | 57 | 148 | -0.19   |  | 14  | 37 | 43 | 94  | -0.13   |
| 29244577  | Sptlc1        | serine palmitoyltransferase 1                                     | 2  | 0  | 0  | 2   | -0.27   |  | 0   | 0  | 0  | 0   |         |
| 6755656   | Sptlc2        | serine palmitoyltransferase 2                                     | 3  | 0  | 0  | 3   | -0.81 # |  | 0   | 0  | 0  | 0   |         |
| 254281222 | Htra2         | serine protease HTRA2, mitochondrial                              | 0  | 1  | 0  | 1   | -0.15   |  | 0   | 0  | 0  | 0   |         |
| 194440687 | Srrm1         | serine/arginine repetitive matrix protein 1 isoform 2             | 27 | 42 | 32 | 101 | -0.11 * |  | 1   | 15 | 7  | 23  | -0.08   |
| 126157504 | Srrm2         | serine/arginine repetitive matrix protein 2                       | 14 | 76 | 47 | 137 | 0.35 *  |  | 1   | 8  | 24 | 33  | 0.16    |
| 13385292  | Rsrc1         | serine/Arginine-related protein 53                                | 1  | 2  | 0  | 3   | 0.17    |  | 0   | 1  | 4  | 5   | 0.26    |
| 34328400  | Srsf1         | serine/arginine-rich splicing factor 1 isoform 1                  | 34 | 40 | 29 | 103 | -0.10   |  | 109 | 19 | 27 | 155 | -0.08   |
| 118582271 | Srsf1         | serine/arginine-rich splicing factor 1 isoform 2                  | 0  | 0  | 0  | 0   |         |  | 0   | 44 | 27 | 71  | -0.04   |
| 6753820   | Srsf10        | serine/arginine-rich splicing factor 10 isoform 1                 | 20 | 32 | 22 | 74  | -0.03   |  | 56  | 56 | 44 | 156 | -0.06   |
| 6755478   | Srsf2         | serine/arginine-rich splicing factor 2                            | 13 | 17 | 14 | 44  | -0.10   |  | 17  | 22 | 17 | 56  | 0.01    |
| 8567402   | Srsf3         | serine/arginine-rich splicing factor 3                            | 35 | 51 | 42 | 128 | -0.10   |  | 64  | 45 | 34 | 143 | -0.13   |
| 309262406 | LOC100502754  | serine/arginine-rich splicing factor 3-like                       | 3  | 0  | 0  | 3   | -0.10   |  | 0   | 0  | 1  | 1   | 0.00    |
| 149266876 | Gm7083        | serine/arginine-rich splicing factor 3-like                       | 0  | 0  | 0  | 0   |         |  | 0   | 3  | 0  | 3   | -0.20   |
| 165377173 | Srsf4         | serine/arginine-rich splicing factor 4                            | 2  | 4  | 4  | 10  | -0.07   |  | 10  | 7  | 7  | 24  | -0.09   |
| 119226245 | Srsf5         | serine/arginine-rich splicing factor 5                            | 10 | 15 | 7  | 32  | -0.08   |  | 19  | 15 | 15 | 49  | 0.01    |
| 309265106 | Gm12966       | serine/arginine-rich splicing factor 5-like                       | 0  | 0  | 0  | 0   |         |  | 0   | 5  | 6  | 11  | -0.07   |
| 306774103 | Srsf7         | serine/arginine-rich splicing factor 7 isoform 4                  | 14 | 39 | 25 | 78  | -0.11 * |  | 38  | 32 | 37 | 107 | -0.05   |
| 13385016  | Srsf9         | serine/arginine-rich splicing factor 9                            | 16 | 23 | 15 | 54  | -0.09   |  | 50  | 23 | 20 | 93  | -0.06   |
| 126362973 | Stk10         | serine/threonine-protein kinase 10                                | 0  | 2  | 0  | 2   | 0.48    |  | 0   | 0  | 0  | 0   |         |
| 51317394  | Aurkb         | serine/threonine-protein kinase 12                                | 0  | 0  | 0  | 0   |         |  | 0   | 3  | 5  | 8   | 0.13    |
| 9507153   | Stk19         | serine/threonine-protein kinase 19                                | 1  | 0  | 0  | 1   | -0.09   |  | 0   | 0  | 0  | 0   |         |
| 21703922  | Stk24         | serine/threonine-protein kinase 24                                | 6  | 0  | 8  | 14  | 0.09    |  | 0   | 0  | 0  | 0   |         |
| 89337277  | Stk25         | serine/threonine-protein kinase 25                                | 0  | 1  | 0  | 1   | 0.50    |  | 0   | 0  | 0  | 0   |         |
| 122937355 | Mark2         | serine/threonine-protein kinase MARK2 isoform 2                   | 0  | 2  | 3  | 5   | -0.08   |  | 0   | 0  | 1  | 1   | -0.30   |
| 283135190 | Cdc42bbp      | serine/threonine-protein kinase MRCK beta                         | 19 | 20 | 7  | 46  | 0.19    |  | 0   | 0  | 0  | 0   |         |
| 19526920  | 2610018G03Rik | serine/threonine-protein kinase MST4                              | 0  | 0  | 0  | 0   |         |  | 0   | 0  | 1  | 1   | -0.15   |
| 260099670 | Pkn2          | serine/threonine-protein kinase N2                                | 0  | 0  | 1  | 1   | -0.22   |  | 0   | 0  | 0  | 0   |         |
| 11037792  | Nek7          | serine/threonine-protein kinase Nek7                              | 0  | 1  | 1  | 2   | 0.20    |  | 0   | 0  | 0  | 0   |         |
| 46559406  | Pak2          | serine/threonine-protein kinase PAK 2                             | 0  | 0  | 0  | 0   |         |  | 0   | 4  | 7  | 11  | 0.02    |
| 29336032  | Pak4          | serine/threonine-protein kinase PAK 4                             | 0  | 3  | 0  | 3   | 0.42    |  | 0   | 0  | 0  | 0   |         |
| 65508357  | Plk5          | serine/threonine-protein kinase PLK5                              | 1  | 0  | 0  | 1   | -5.93 # |  | 0   | 0  | 0  | 0   |         |
| 158854005 | Prpf4b        | serine/threonine-protein kinase PRP4 homolog                      | 24 | 86 | 45 | 155 | 0.03    |  | 2   | 22 | 23 | 47  | -0.68 # |
| 124358959 | Taok1         | serine/threonine-protein kinase TAO1                              | 2  | 7  | 5  | 14  | -0.06   |  | 0   | 0  | 0  | 0   |         |
| 314122203 | Taok3         | serine/threonine-protein kinase TAO3                              | 5  | 9  | 10 | 24  | -0.05   |  | 0   | 0  | 0  | 0   |         |

|           |          |                                                                                             |    |    |    |     |        |    |    |    |     |        |
|-----------|----------|---------------------------------------------------------------------------------------------|----|----|----|-----|--------|----|----|----|-----|--------|
| 224994273 | Tlk1     | serine/threonine-protein kinase tousled-like 1                                              | 0  | 3  | 0  | 3   | 0.36   | 0  | 0  | 0  | 0   |        |
| 166063978 | Tlk2     | serine/threonine-protein kinase tousled-like 2 isoform B                                    | 0  | 2  | 0  | 2   | 1.34#  | 0  | 0  | 0  | 0   |        |
| 6755985   | Vrk1     | serine/threonine-protein kinase VRK1 isoform a                                              | 0  | 0  | 58 | 58  | -0.08  | 0  | 0  | 0  | 0   |        |
| 71067120  | Vrk1     | serine/threonine-protein kinase VRK1 isoform c                                              | 60 | 64 | 2  | 126 | 0.00   | 23 | 45 | 37 | 105 | -0.08  |
| 160333463 | Vrk2     | serine/threonine-protein kinase VRK2                                                        | 0  | 0  | 0  | 0   |        | 0  | 3  | 2  | 5   | 0.04   |
| 255308879 | Ppp1r10  | serine/threonine-protein phosphatase 1 regulatory subunit 10 isoform 2                      | 28 | 47 | 24 | 99  | 0.16   | 3  | 13 | 9  | 25  | 0.01   |
| 110625886 | Ppp2r2a  | serine/threonine-protein phosphatase 2A 55 kDa regulatory subunit B alpha isoform isoform 1 | 0  | 0  | 1  | 1   | -0.28  | 0  | 0  | 0  | 0   |        |
| 67972402  | Ppp2r2b  | serine/threonine-protein phosphatase 2A 55 kDa regulatory subunit B beta isoform isoform 1  | 0  | 0  | 0  | 0   |        | 0  | 0  | 1  | 1   | 0.24   |
| 8394027   | Ppp2r1a  | serine/threonine-protein phosphatase 2A 65 kDa regulatory subunit A alpha isoform           | 22 | 36 | 34 | 92  | 0.23*  | 15 | 26 | 68 | 109 | -0.03  |
| 254587947 | Ppp2r4   | serine/threonine-protein phosphatase 2A activator                                           | 0  | 0  | 0  | 0   |        | 0  | 0  | 3  | 3   | -0.08  |
| 9506983   | Ppp2ca   | serine/threonine-protein phosphatase 2A catalytic subunit alpha isoform                     | 8  | 9  | 17 | 34  | 0.21   | 3  | 0  | 20 | 23  | 0.21   |
| 8394024   | Ppp2cb   | serine/threonine-protein phosphatase 2A catalytic subunit beta isoform                      | 8  | 10 | 0  | 18  | 0.18   | 0  | 16 | 1  | 17  | -0.09  |
| 9790175   | Ppp4c    | serine/threonine-protein phosphatase 4 catalytic subunit                                    | 1  | 3  | 3  | 7   | 0.31   | 0  | 1  | 0  | 1   | -0.04  |
| 33636709  | Ppp4r2   | serine/threonine-protein phosphatase 4 regulatory subunit 2                                 | 0  | 0  | 0  | 0   |        | 0  | 0  | 1  | 1   | -0.33  |
| 254587960 | Pgam5    | serine/threonine-protein phosphatase PGAM5, mitochondrial isoform 2                         | 1  | 7  | 3  | 11  | 0.10   | 3  | 6  | 7  | 16  | 0.04   |
| 13994195  | Ppp1ca   | serine/threonine-protein phosphatase PP1-alpha catalytic subunit                            | 44 | 54 | 65 | 163 | 0.11   | 41 | 40 | 61 | 142 | 0.18*  |
| 161484668 | Ppp1cb   | serine/threonine-protein phosphatase PP1-beta catalytic subunit                             | 38 | 51 | 68 | 157 | 0.12*  | 23 | 31 | 87 | 141 | 0.18*  |
| 31980772  | Ppp1cc   | serine/threonine-protein phosphatase PP1-gamma catalytic subunit                            | 29 | 34 | 74 | 137 | 0.10   | 26 | 49 | 79 | 154 | 0.26   |
| 163838660 | Atm      | serine-protein kinase ATM                                                                   | 13 | 32 | 10 | 55  | 0.46*  | 0  | 1  | 1  | 2   | 0.19   |
| 160707896 | Strap    | serine-threonine kinase receptor-associated protein                                         | 11 | 13 | 6  | 30  | 0.07   | 0  | 1  | 0  | 1   | -0.21  |
| 161353502 | Serpinh1 | serpin H1 precursor                                                                         | 14 | 12 | 19 | 45  | -0.19  | 2  | 7  | 6  | 15  | 0.08   |
| 158186674 | Srrt     | serrate RNA effector molecule homolog isoform 3                                             | 46 | 33 | 40 | 119 | 0.05   | 29 | 48 | 50 | 127 | 0.02   |
| 163310765 | Alb      | serum albumin precursor                                                                     | 0  | 1  | 22 | 23  | -1.37# | 0  | 1  | 2  | 3   | -1.02# |
| 148540184 | Srfbp1   | serum response factor-binding protein 1                                                     | 7  | 8  | 7  | 22  | -0.16  | 1  | 7  | 11 | 19  | 0.19   |
| 33468931  | Sars     | seryl-tRNA synthetase, cytoplasmic isoform 1                                                | 7  | 11 | 14 | 32  | -0.05  | 0  | 1  | 2  | 3   | 0.14   |
| 119508422 | Setd1a   | SET domain containing 1A                                                                    | 1  | 10 | 5  | 16  | 0.61*# | 0  | 0  | 0  | 0   |        |
| 197927225 | Setd2    | SET domain containing 2                                                                     | 1  | 0  | 1  | 2   | -0.34  | 0  | 0  | 0  | 0   |        |
| 268370088 | Setd3    | SET domain-containing protein 3                                                             | 3  | 4  | 3  | 10  | -0.38  | 0  | 0  | 0  | 0   |        |
| 124248550 | Ash2l    | set1/Ash2 histone methyltransferase complex subunit ASH2 isoform b                          | 18 | 21 | 16 | 55  | 0.25*  | 0  | 4  | 4  | 8   | 0.10   |
| 13937355  | Esd      | S-formylglutathione hydrolase                                                               | 0  | 1  | 2  | 3   | 0.00   | 0  | 2  | 9  | 11  | 0.00   |
| 206597474 | Sh2d4a   | SH2 domain-containing protein 4A                                                            | 1  | 1  | 0  | 2   | -0.60# | 0  | 0  | 0  | 0   |        |
| 9910548   | Sh3bgrl  | SH3 domain-binding glutamic acid-rich-like protein                                          | 1  | 2  | 1  | 4   | 0.08   | 0  | 0  | 0  | 0   |        |
| 27369694  | Sh3bgrl2 | SH3 domain-binding glutamic acid-rich-like protein 2                                        | 12 | 7  | 9  | 28  | -0.02  | 0  | 0  | 0  | 0   |        |
| 18017602  | Sh3bgrl3 | SH3 domain-binding glutamic acid-rich-like protein 3                                        | 1  | 2  | 2  | 5   | -0.30  | 0  | 0  | 0  | 0   |        |



|           |              |                                                                       |     |     |     |     |         |  |     |     |     |     |        |
|-----------|--------------|-----------------------------------------------------------------------|-----|-----|-----|-----|---------|--|-----|-----|-----|-----|--------|
| 85838509  | Sh3bp1       | SH3 domain-binding protein 1                                          | 2   | 14  | 11  | 27  | -0.02   |  | 0   | 0   | 0   | 0   |        |
| 9790207   | Scoc         | short coiled-coil protein isoform b                                   | 1   | 0   | 0   | 1   | -0.11   |  | 0   | 0   | 0   | 0   |        |
| 17647119  | Acadseb      | short/branched chain specific acyl-CoA dehydrogenase, mitochondrial   | 3   | 2   | 6   | 11  | -0.03   |  | 0   | 2   | 2   | 4   | -0.23  |
| 31982522  | Acads        | short-chain specific acyl-CoA dehydrogenase, mitochondrial precursor  | 22  | 14  | 17  | 53  | -0.06   |  | 0   | 7   | 14  | 21  | -0.15  |
| 16716467  | Nans         | sialic acid synthase                                                  | 0   | 0   | 0   | 0   |         |  | 0   | 1   | 6   | 7   | -0.27  |
| 46358401  | Etl4         | sickle tail protein isoform b                                         | 0   | 0   | 0   | 0   |         |  | 0   | 0   | 1   | 1   | 1.43#  |
| 294979218 | Etl4         | sickle tail protein isoform e                                         | 0   | 0   | 0   | 0   |         |  | 0   | 0   | 1   | 1   | 0.44   |
| 15147224  | Sfxn1        | sideroflexin-1                                                        | 0   | 0   | 1   | 1   | 0.21    |  | 2   | 0   | 3   | 5   | -0.20  |
| 295821212 | Sfxn3        | sideroflexin-3 isoform 3                                              | 0   | 0   | 0   | 0   |         |  | 0   | 0   | 4   | 4   | 0.13   |
| 9910550   | Sec11a       | signal peptidase complex catalytic subunit SEC11A                     | 10  | 6   | 5   | 21  | -0.40*  |  | 20  | 4   | 0   | 24  | -0.28  |
| 21313554  | Sec11c       | signal peptidase complex catalytic subunit SEC11C                     | 1   | 0   | 0   | 1   | 0.70#   |  | 0   | 0   | 0   | 0   |        |
| 193788663 | Spes1        | signal peptidase complex subunit 1                                    | 0   | 0   | 0   | 0   |         |  | 2   | 0   | 0   | 2   | -0.17  |
| 13385134  | Spes2        | signal peptidase complex subunit 2                                    | 6   | 10  | 6   | 22  | -0.56   |  | 12  | 12  | 13  | 37  | -0.34* |
| 125988403 | Spes3        | signal peptidase complex subunit 3                                    | 3   | 2   | 2   | 7   | -0.34*  |  | 12  | 4   | 4   | 20  | -0.20  |
| 309264544 | LOC100504988 | signal recognition particle 14 kDa protein-like                       | 3   | 7   | 3   | 13  | -0.65*# |  | 0   | 0   | 0   | 0   |        |
| 160333840 | Srp19        | signal recognition particle 19 kDa protein                            | 11  | 16  | 10  | 37  | -0.10   |  | 0   | 1   | 4   | 5   | -0.11  |
| 153791789 | Srp54b       | signal recognition particle 54 kDa protein                            | 7   | 5   | 6   | 18  | -0.10   |  | 3   | 12  | 16  | 31  | -0.11  |
| 47271535  | Srp68        | signal recognition particle 68 kDa protein                            | 3   | 3   | 5   | 11  | -0.06   |  | 0   | 5   | 9   | 14  | -0.01  |
| 118344452 | Srp72        | signal recognition particle 72                                        | 1   | 7   | 7   | 15  | -0.02   |  | 0   | 2   | 5   | 7   | -0.18  |
| 309264494 | LOC100503508 | signal recognition particle 9 kDa protein-like                        | 2   | 2   | 2   | 6   | -0.14   |  | 1   | 0   | 0   | 1   | -0.26  |
| 27229036  | Srpr         | signal recognition particle receptor subunit alpha                    | 2   | 1   | 0   | 3   | -0.57   |  | 0   | 0   | 0   | 0   |        |
| 6678137   | Srprb        | signal recognition particle receptor subunit beta                     | 16  | 12  | 11  | 39  | -0.23   |  | 5   | 11  | 5   | 21  | -0.14  |
| 22094115  | Stat3        | signal transducer and activator of transcription 3 isoform 3          | 0   | 0   | 0   | 0   |         |  | 0   | 0   | 1   | 1   | -0.63# |
| 269784713 | Sipa111      | signal-induced proliferation-associated 1-like protein 1 isoform 1    | 0   | 0   | 1   | 1   | 0.33    |  | 0   | 0   | 0   | 0   |        |
| 169881247 | Suds3        | sin3 histone deacetylase corepressor complex component SDS3 isoform a | 2   | 4   | 4   | 10  | 0.06    |  | 0   | 1   | 0   | 1   | 0.28   |
| 47059026  | Ssbp1        | single-stranded DNA-binding protein, mitochondrial isoform 1          | 7   | 23  | 13  | 43  | 0.04    |  | 14  | 23  | 23  | 60  | 0.12*  |
| 124486765 | Pds5a        | sister chromatid cohesion protein PDS5 homolog A                      | 102 | 142 | 131 | 375 | 0.23    |  | 5   | 61  | 63  | 129 | 0.18*  |
| 66955886  | Pds5b        | sister chromatid cohesion protein PDS5 homolog B                      | 117 | 158 | 109 | 384 | 0.18    |  | 13  | 60  | 96  | 169 | 0.10   |
| 166064058 | Slit2        | slit homolog 2 protein precursor                                      | 0   | 2   | 2   | 4   | -0.08   |  | 0   | 0   | 0   | 0   |        |
| 227430375 | Snip1        | smad nuclear-interacting protein 1                                    | 0   | 1   | 0   | 1   | -0.28   |  | 0   | 1   | 2   | 3   | 0.13   |
| 309264991 | LOC100503839 | small EDRK-rich factor 2-like                                         | 2   | 4   | 0   | 6   | -0.06   |  | 0   | 1   | 0   | 1   | -0.21  |
| 27883844  | Snrpe        | small nuclear ribonucleoprotein E                                     | 30  | 24  | 17  | 71  | 0.01    |  | 21  | 13  | 6   | 40  | 0.01   |
| 254028189 | Snrpf        | small nuclear ribonucleoprotein F                                     | 28  | 34  | 39  | 101 | -0.03   |  | 44  | 16  | 26  | 86  | 0.00   |
| 94401818  | Gm8186       | small nuclear ribonucleoprotein G-like                                | 13  | 14  | 20  | 47  | 0.03    |  | 8   | 1   | 5   | 14  | 0.03   |
| 309265133 | Gm8186       | small nuclear ribonucleoprotein G-like                                | 0   | 0   | 2   | 2   | 0.04    |  | 0   | 0   | 4   | 4   | -0.04  |
| 6678055   | Snrpd1       | small nuclear ribonucleoprotein Sm D1                                 | 66  | 78  | 63  | 207 | 0.03    |  | 112 | 57  | 49  | 218 | 0.04   |
| 309264642 | Gm14277      | small nuclear ribonucleoprotein Sm D1-like                            | 1   | 0   | 0   | 1   | -0.11   |  | 0   | 0   | 2   | 2   | -0.18  |
| 58037145  | Snrpd2       | small nuclear ribonucleoprotein Sm D2                                 | 24  | 47  | 30  | 101 | -0.02   |  | 79  | 35  | 24  | 138 | 0.01   |
| 13385598  | Snrpd3       | small nuclear ribonucleoprotein Sm D3                                 | 37  | 50  | 30  | 117 | -0.12   |  | 70  | 30  | 30  | 130 | 0.13   |
| 6678053   | Snrpb        | small nuclear ribonucleoprotein-associated protein B                  | 45  | 50  | 37  | 132 | -0.01   |  | 52  | 43  | 25  | 120 | -0.02  |
| 226437674 | Utp20        | small subunit processome component 20 homolog                         | 50  | 111 | 74  | 235 | -0.15   |  | 2   | 116 | 170 | 288 | -0.04  |
| 6678489   | Sumo1        | small ubiquitin-related modifier 1 precursor                          | 1   | 2   | 1   | 4   | 0.46    |  | 0   | 1   | 0   | 1   | 0.22   |
| 309263434 | Gm10241      | small ubiquitin-related modifier 2-like                               | 4   | 8   | 6   | 18  | 0.30    |  | 0   | 2   | 2   | 4   | 0.11   |

|           |               |                                                                                     |     |     |     |     |        |     |     |     |     |       |     |
|-----------|---------------|-------------------------------------------------------------------------------------|-----|-----|-----|-----|--------|-----|-----|-----|-----|-------|-----|
| 19923056  | Snapi         | SNARE-associated protein Snapi                                                      | 0   | 1   | 0   | 1   | -0.26  | 0   | 0   | 0   | 0   |       |     |
| 146149191 | Snw1          | SNW domain-containing protein 1                                                     | 6   | 22  | 10  | 38  | 0.06   | 37  | 39  | 33  | 109 | 0.10  |     |
| 124487197 | Sclt1         | sodium channel and clathrin linker 1                                                | 1   | 1   | 0   | 2   | 0.44   | 0   | 0   | 0   | 0   |       |     |
| 254675275 | Scnm1         | sodium channel modifier 1 isoform 2                                                 | 2   | 3   | 0   | 5   | -0.16  | 0   | 0   | 0   | 0   |       |     |
| 84875498  | Scn5a         | sodium channel protein type 5 subunit alpha                                         | 0   | 1   | 0   | 1   | -0.49  | 0   | 0   | 0   | 0   |       |     |
| 21450277  | Atp1a1        | sodium/potassium-transporting ATPase subunit alpha-1 precursor                      | 30  | 12  | 20  | 62  | -0.25  | 107 | 44  | 206 | 357 | -0.10 |     |
| 30409956  | Atp1a2        | sodium/potassium-transporting ATPase subunit alpha-2 precursor                      | 0   | 0   | 0   | 0   |        | 0   | 0   | 1   | 1   | -0.34 |     |
| 6753138   | Atp1b1        | sodium/potassium-transporting ATPase subunit beta-1                                 | 5   | 2   | 1   | 8   | -0.51  | 1   | 0   | 1   | 2   | -0.78 | #   |
| 213513245 | Nkain4        | sodium/potassium-transporting ATPase subunit beta-1-interacting protein 4 isoform 2 | 0   | 0   | 0   | 0   |        | 2   | 0   | 0   | 2   | -0.14 |     |
| 16554572  | Fxyd2         | sodium/potassium-transporting ATPase subunit gamma isoform b                        | 2   | 0   | 1   | 3   | -0.32  | 0   | 0   | 0   | 0   |       |     |
| 56090652  | Slc25a42      | solute carrier family 25 member 42                                                  | 0   | 0   | 0   | 0   |        | 0   | 0   | 4   | 4   | -0.11 |     |
| 254692847 | Slc25a48      | solute carrier family 25 member 48                                                  | 0   | 0   | 1   | 1   | -0.24  | 0   | 0   | 0   | 0   |       |     |
| 23943838  | Slc25a1       | solute carrier family 25, member 1                                                  | 7   | 3   | 5   | 15  | -0.03  | 6   | 8   | 5   | 19  | 0.03  |     |
| 7949137   | Slc35b1       | solute carrier family 35 member B1                                                  | 1   | 0   | 0   | 1   | -0.16  | 0   | 2   | 0   | 2   | -0.31 |     |
| 28893565  | Slc41a2       | solute carrier family 41 member 2                                                   | 0   | 0   | 0   | 0   |        | 0   | 1   | 0   | 1   | -0.31 |     |
| 12746430  | Utp3          | something about silencing protein 10                                                | 3   | 5   | 2   | 10  | -0.13  | 13  | 22  | 19  | 54  | 0.04  |     |
| 124301206 | Sorbs2        | sorbin and SH3 domain-containing protein 2                                          | 1   | 4   | 0   | 5   | 0.10   | 0   | 0   | 0   | 0   |       |     |
| 124430543 | Sri           | sorcin isoform 2                                                                    | 1   | 3   | 1   | 5   | -0.27  | 0   | 1   | 1   | 2   | 1.69  | #   |
| 13385902  | Cdca5         | sororin                                                                             | 4   | 4   | 0   | 8   | 0.31   | 0   | 0   | 0   | 0   |       |     |
| 110625645 | Sorl1         | sortilin-related receptor                                                           | 6   | 5   | 4   | 15  | -0.07  | 0   | 2   | 1   | 3   | 0.12  |     |
| 30519943  | Samm50        | sorting and assembly machinery component 50 homolog                                 | 0   | 0   | 0   | 0   |        | 5   | 18  | 14  | 37  | 0.53  | *,# |
| 160333832 | Snx12         | sorting nexin-12 isoform 1                                                          | 1   | 1   | 1   | 3   | 0.24   | 0   | 0   | 0   | 0   |       |     |
| 31560433  | Snx3          | sorting nexin-3                                                                     | 3   | 4   | 4   | 11  | -0.29  | 0   | 2   | 4   | 6   | -0.18 |     |
| 18034769  | Snx5          | sorting nexin-5                                                                     | 0   | 0   | 0   | 0   |        | 0   | 0   | 1   | 1   | -0.09 |     |
| 149269540 | LOC100039155  | sorting nexin-9-like                                                                | 0   | 0   | 1   | 1   | 0.36   | 0   | 0   | 0   | 0   |       |     |
| 28076937  | Obfc2b        | SOSS complex subunit B1                                                             | 8   | 12  | 5   | 25  | 0.28*  | 0   | 1   | 0   | 1   | -0.06 |     |
| 126723205 | Obfc2a        | SOSS complex subunit B2                                                             | 0   | 1   | 0   | 1   | 0.50   | 0   | 0   | 0   | 0   |       |     |
| 62526128  | 1110054O05Rik | SOSS complex subunit C                                                              | 3   | 6   | 4   | 13  | 0.41   | 0   | 1   | 0   | 1   | 0.16  |     |
| 295054266 | Spna2         | spectrin alpha chain, brain isoform 2                                               | 187 | 325 | 356 | 868 | 0.34   | 63  | 108 | 0   | 171 | 0.40  |     |
| 295054271 | Spna2         | spectrin alpha chain, brain isoform 3                                               | 231 | 267 | 354 | 852 | 0.36   | 0   | 37  | 45  | 82  | 0.60  | #   |
| 116174793 | Spnb4         | spectrin beta 4 isoform sigma1                                                      | 0   | 1   | 0   | 1   | 0.18   | 0   | 0   | 0   | 0   |       |     |
| 117938332 | Spnb2         | spectrin beta chain, brain 1 isoform 1                                              | 164 | 205 | 204 | 573 | 0.40   | 7   | 0   | 5   | 12  | 0.73  | #   |
| 117938334 | Spnb2         | spectrin beta chain, brain 1 isoform 2                                              | 114 | 156 | 185 | 455 | 0.43   | 0   | 23  | 1   | 24  | 0.19  |     |
| 55926127  | Spnb3         | spectrin beta chain, brain 2                                                        | 134 | 240 | 104 | 478 | 0.55*  | 13  | 55  | 25  | 93  | 0.68  | *,# |
| 13385180  | Spesp1        | sperm equatorial segment protein 1 precursor                                        | 0   | 0   | 0   | 0   |        | 0   | 1   | 0   | 1   | -0.01 |     |
| 264681516 | Spag7         | sperm-associated antigen 7 isoform 1                                                | 0   | 1   | 1   | 2   | 0.37   | 0   | 0   | 0   | 0   |       |     |
| 114842377 | Strbp         | spermatid perinuclear RNA-binding protein                                           | 16  | 24  | 18  | 58  | 0.06   | 2   | 11  | 7   | 20  | 0.06  |     |
| 254553468 | Spata5        | spermatogenesis-associated protein 5 isoform 2                                      | 0   | 0   | 0   | 0   |        | 0   | 0   | 2   | 2   | -0.24 |     |
| 20982833  | Spats2        | spermatogenesis-associated serine-rich protein 2                                    | 0   | 2   | 2   | 4   | 0.02   | 0   | 0   | 0   | 0   |       |     |
| 158854016 | Skp1a         | S-phase kinase-associated protein 1                                                 | 28  | 30  | 20  | 78  | 0.00   | 7   | 8   | 11  | 26  | 0.15  |     |
| 6681175   | Degs1         | sphingolipid delta(4)-desaturase DES1                                               | 1   | 0   | 0   | 1   | -0.66# | 2   | 0   | 1   | 3   | -0.40 |     |
| 257196247 | Smpd4         | sphingomyelin phosphodiesterase 4 isoform 2                                         | 0   | 0   | 9   | 9   | -0.18  | 6   | 0   | 23  | 29  | 0.04  |     |
| 257196245 | Smpd4         | sphingomyelin phosphodiesterase 4 isoform 3                                         | 10  | 11  | 0   | 21  | -0.17  | 0   | 26  | 0   | 26  | -0.01 |     |
| 289191399 | Sphk2         | sphingosine kinase 2                                                                | 0   | 1   | 0   | 1   | -0.14  | 0   | 0   | 0   | 0   |       |     |
| 31543694  | Sgpl1         | sphingosine-1-phosphate lyase 1                                                     | 14  | 13  | 13  | 40  | -0.20  | 0   | 10  | 5   | 15  | -0.22 |     |

|           |               |                                                                        |     |     |     |     |         |     |     |     |      |         |
|-----------|---------------|------------------------------------------------------------------------|-----|-----|-----|-----|---------|-----|-----|-----|------|---------|
| 6755620   | Spin1         | spindlin-1 isoform 1                                                   | 9   | 11  | 5   | 25  | -0.06   | 1   | 8   | 10  | 19   | -0.04   |
| 30520207  | Spin4         | spindlin-4                                                             | 0   | 0   | 0   | 0   |         | 0   | 1   | 2   | 3    | -0.16   |
| 9790069   | Ddx39b        | spliceosome RNA helicase Ddx39b                                        | 65  | 73  | 83  | 221 | -0.02   | 108 | 194 | 137 | 439  | 0.03    |
| 160707945 | Sf1           | splicing factor 1 isoform 2                                            | 42  | 72  | 32  | 146 | 0.07    | 11  | 30  | 23  | 64   | 0.24 *  |
| 165932270 | Sf3a1         | splicing factor 3A subunit 1                                           | 72  | 77  | 92  | 241 | 0.02    | 146 | 174 | 198 | 518  | 0.02    |
| 158749553 | Sf3a2         | splicing factor 3A subunit 2                                           | 25  | 21  | 15  | 61  | -0.03   | 51  | 26  | 13  | 90   | 0.03    |
| 22095003  | Sf3a3         | splicing factor 3A subunit 3                                           | 32  | 38  | 29  | 99  | 0.03    | 27  | 53  | 27  | 107  | -0.05   |
| 153791358 | Sf3b1         | splicing factor 3B subunit 1                                           | 171 | 251 | 247 | 669 | 0.00    | 372 | 676 | 732 | 1780 | -0.04   |
| 19527174  | Sf3b3         | splicing factor 3B subunit 3                                           | 125 | 128 | 165 | 418 | 0.03    | 356 | 512 | 500 | 1368 | -0.03   |
| 23346437  | Sf3b4         | splicing factor 3B subunit 4                                           | 11  | 19  | 10  | 40  | -0.01   | 20  | 31  | 26  | 77   | -0.03   |
| 85540445  | Sf3b5         | splicing factor 3B subunit 5                                           | 10  | 15  | 9   | 34  | -0.24   | 28  | 5   | 10  | 43   | -0.07   |
| 268837785 | Sf3b2         | splicing factor 3B, subunit 2                                          | 50  | 61  | 80  | 191 | 0.07    | 75  | 141 | 131 | 347  | -0.01   |
| 22779924  | Rbm17         | splicing factor 45                                                     | 4   | 13  | 12  | 29  | 0.16 *  | 7   | 14  | 7   | 28   | 0.19    |
| 254939694 | U2af1         | splicing factor U2AF 35 kDa subunit isoform 1                          | 50  | 54  | 35  | 139 | 0.00    | 56  | 55  | 73  | 184  | 0.00    |
| 164565377 | U2af2         | splicing factor U2AF 65 kDa subunit isoform 2                          | 52  | 82  | 54  | 188 | 0.03    | 79  | 70  | 51  | 200  | 0.01    |
| 309271453 | Gm7061        | splicing factor U2AF 65 kDa subunit-like                               | 10  | 7   | 15  | 32  | -0.23 * | 0   | 3   | 4   | 7    | -0.11   |
| 147898671 | Srsf11        | splicing factor, arginine/serine-rich 11 isoform 1                     | 25  | 45  | 29  | 99  | 0.16    | 7   | 16  | 21  | 44   | 0.09    |
| 109150409 | Scaf4         | splicing factor, arginine/serine-rich 15                               | 10  | 15  | 18  | 43  | 0.07    | 2   | 20  | 18  | 40   | 0.23    |
| 226437597 | Sf3b18        | splicing factor, arginine/serine-rich 18                               | 0   | 3   | 0   | 3   | 0.16    | 0   | 0   | 1   | 1    | 0.32    |
| 56605682  | Scaf1         | splicing factor, arginine/serine-rich 19                               | 0   | 0   | 0   | 0   |         | 0   | 0   | 5   | 5    | -0.72 # |
| 117647277 | Scaf11        | splicing factor, arginine/serine-rich 2, interacting protein           | 35  | 28  | 31  | 94  | 0.19 *  | 48  | 62  | 103 | 213  | 0.40 *  |
| 78217391  | Sfswap        | splicing factor, arginine/serine-rich 8                                | 3   | 7   | 3   | 13  | 0.24 *  | 0   | 0   | 1   | 1    | 0.12    |
| 23956214  | Sfpq          | splicing factor, proline- and glutamine-rich                           | 237 | 249 | 186 | 672 | -0.05   | 191 | 270 | 179 | 640  | -0.07   |
| 27369842  | Srek1         | splicing regulatory glutamine/lysine-rich protein 1                    | 14  | 35  | 15  | 64  | 0.13    | 0   | 3   | 12  | 15   | 0.11    |
| 58037095  | Spryd4        | SPRY domain-containing protein 4                                       | 4   | 3   | 2   | 9   | -0.11   | 0   | 0   | 0   | 0    |         |
| 8394239   | Sart3         | squamous cell carcinoma antigen recognized by T-cells 3                | 0   | 0   | 0   | 0   |         | 0   | 0   | 1   | 1    | 0.04    |
| 283046784 | 1810035L17Rik | SRA stem-loop-interacting RNA-binding protein, mitochondrial precursor | 2   | 1   | 1   | 4   | -0.14   | 1   | 0   | 0   | 1    | -0.12   |
| 75677414  | Cttn          | src substrate cortactin                                                | 22  | 45  | 19  | 86  | 0.42 *  | 0   | 3   | 1   | 4    | 0.05    |
| 309262863 | Hist1h2al     | src substrate cortactin                                                | 13  | 42  | 77  | 132 | -0.21   | 0   | 46  | 41  | 87   | -0.10   |
| 58037285  | Supt7l        | STAGA complex 65 subunit gamma                                         | 0   | 0   | 1   | 1   | -0.34   | 0   | 0   | 0   | 0    |         |
| 77404392  | Snd1          | staphylococcal nuclease domain-containing protein 1                    | 40  | 44  | 30  | 114 | 0.03    | 0   | 17  | 20  | 37   | -0.17   |
| 9789995   | Stmn1         | stathmin                                                               | 1   | 0   | 3   | 4   | -1.20 # | 0   | 0   | 0   | 0    |         |
| 257467552 | Slk           | STE20-like serine/threonine-protein kinase isoform 1                   | 0   | 1   | 3   | 4   | 0.16    | 0   | 0   | 0   | 0    |         |
| 226958514 | Samd9l        | sterile alpha motif domain-containing protein 9-like                   | 37  | 59  | 61  | 157 | -0.02   | 0   | 13  | 26  | 39   | 0.15    |
| 112293262 | Esrra         | steroid hormone receptor ERR1                                          | 14  | 21  | 18  | 53  | -0.03   | 0   | 11  | 7   | 18   | -0.02   |
| 226958367 | Esrrb         | steroid hormone receptor ERR2 isoform 2                                | 6   | 5   | 0   | 11  | 0.15    | 0   | 0   | 0   | 0    |         |
| 84619697  | Soat1         | sterol O-acyltransferase 1                                             | 0   | 0   | 0   | 0   |         | 15  | 6   | 12  | 33   | -0.28 * |
| 31982437  | Nsdhl         | sterol-4-alpha-carboxylate 3-dehydrogenase, decarboxylating            | 4   | 0   | 0   | 4   | -0.21   | 0   | 0   | 0   | 0    |         |
| 9789907   | Stub1         | STIP1 homology and U box-containing protein 1                          | 6   | 7   | 13  | 26  | 0.14    | 0   | 0   | 3   | 3    | -0.05   |
| 12963591  | Stoml2        | stomatin-like protein 2                                                | 0   | 0   | 1   | 1   | -0.08   | 6   | 4   | 3   | 13   | -0.13   |
| 162461907 | Hspa9         | stress-70 protein, mitochondrial                                       | 42  | 30  | 41  | 113 | -0.13   | 22  | 17  | 21  | 60   | -0.16   |
| 237820671 | Serp2         | stress-associated endoplasmic reticulum protein 2                      | 0   | 0   | 0   | 0   |         | 0   | 1   | 0   | 1    | -0.62 # |
| 14389431  | Stip1         | stress-induced-phosphoprotein 1                                        | 12  | 12  | 11  | 35  | -0.19   | 0   | 1   | 1   | 2    | 0.24    |
| 226958306 | Sdf2          | stromal cell-derived factor 2                                          | 1   | 5   | 0   | 6   | -0.20   | 0   | 0   | 2   | 2    | 0.32    |
| 11612505  | Sdf2l1        | stromal cell-derived factor 2-like protein 1 precursor                 | 11  | 11  | 5   | 27  | -0.15   | 0   | 6   | 4   | 10   | 0.05    |

|           |              |                                                                                    |     |     |     |     |         |     |     |     |     |         |  |
|-----------|--------------|------------------------------------------------------------------------------------|-----|-----|-----|-----|---------|-----|-----|-----|-----|---------|--|
| 281182368 | Stim2        | stromal interaction molecule 2 precursor                                           | 0   | 0   | 1   | 1   | -0.20   | 0   | 0   | 0   | 0   |         |  |
| 148839318 | Smchd1       | structural maintenance of chromosomes flexible hinge domain-containing protein 1   | 139 | 221 | 126 | 486 | 0.15    | 28  | 120 | 131 | 279 | 0.11    |  |
| 258613892 | Smc1a        | structural maintenance of chromosomes protein 1A                                   | 98  | 126 | 106 | 330 | 0.10    | 73  | 120 | 119 | 312 | 0.13    |  |
| 62990166  | Smc2         | structural maintenance of chromosomes protein 2                                    | 20  | 33  | 28  | 81  | 0.22    | 0   | 6   | 4   | 10  | 0.07    |  |
| 36031035  | Smc3         | structural maintenance of chromosomes protein 3                                    | 121 | 125 | 144 | 390 | 0.18    | 104 | 178 | 235 | 517 | 0.14 *  |  |
| 29789347  | Smc4         | structural maintenance of chromosomes protein 4                                    | 13  | 25  | 19  | 57  | 0.29    | 0   | 2   | 0   | 2   | -0.19   |  |
| 24497433  | Smc5         | structural maintenance of chromosomes protein 5                                    | 10  | 15  | 13  | 38  | 0.15    | 2   | 33  | 34  | 69  | -0.29   |  |
| 24415998  | Smc6         | structural maintenance of chromosomes protein 6                                    | 17  | 18  | 15  | 50  | -0.02   | 0   | 39  | 41  | 80  | -0.15   |  |
| 54607098  | Sdha         | succinate dehydrogenase [ubiquinone] flavoprotein subunit, mitochondrial precursor | 8   | 1   | 0   | 9   | -0.36   | 5   | 0   | 0   | 5   | -0.37   |  |
| 34328286  | Sdhb         | succinate dehydrogenase [ubiquinone] iron-sulfur subunit, mitochondrial precursor  | 10  | 1   | 3   | 14  | -0.15   | 2   | 2   | 0   | 4   | -0.41   |  |
| 228008307 | Sdhc         | succinate dehydrogenase cytochrome b560 subunit, mitochondrial precursor           | 1   | 0   | 0   | 1   | -0.17   | 3   | 0   | 0   | 3   | -0.32   |  |
| 27369748  | Aldh5a1      | succinate-semialdehyde dehydrogenase, mitochondrial precursor                      | 1   | 0   | 0   | 1   | -0.26   | 0   | 0   | 0   | 0   |         |  |
| 46849708  | Sucla2       | succinyl-CoA ligase [ADP-forming] subunit beta, mitochondrial precursor            | 3   | 0   | 1   | 4   | -0.03   | 0   | 3   | 7   | 10  | -0.36   |  |
| 255958286 | Suclg1       | succinyl-CoA ligase [GDP-forming] subunit alpha, mitochondrial precursor           | 9   | 4   | 7   | 20  | -0.04   | 0   | 4   | 11  | 15  | -0.17   |  |
| 165972309 | Suclg2       | succinyl-CoA ligase [GDP-forming] subunit beta, mitochondrial precursor            | 7   | 2   | 8   | 17  | -0.20 * | 0   | 4   | 8   | 12  | -0.19   |  |
| 18266680  | Oxct1        | succinyl-CoA:3-ketoacid-coenzyme A transferase 1, mitochondrial precursor          | 8   | 0   | 8   | 16  | -0.08   | 0   | 4   | 2   | 6   | 0.04    |  |
| 188497726 | Slc50a1      | sugar transporter SWEET1                                                           | 1   | 0   | 0   | 1   | 0.01    | 0   | 0   | 0   | 0   |         |  |
| 144094256 | Sumf1        | sulfatase-modifying factor 1 precursor                                             | 0   | 2   | 5   | 7   | -0.13   | 0   | 0   | 0   | 0   |         |  |
| 225735655 | Psap         | sulfated glycoprotein 1 isoform E preproprotein                                    | 26  | 11  | 20  | 57  | 0.08    | 5   | 1   | 5   | 11  | 0.17    |  |
| 244790045 | Sqrdl        | sulfide:quinone oxidoreductase, mitochondrial precursor                            | 11  | 14  | 13  | 38  | -0.09   | 33  | 45  | 53  | 131 | 0.14    |  |
| 188219649 | Sult1d1      | sulfotransferase family 1D, member 1                                               | 0   | 0   | 0   | 0   |         | 1   | 7   | 4   | 12  | -0.03   |  |
| 9790247   | Sae1         | SUMO-activating enzyme subunit 1                                                   | 0   | 0   | 0   | 0   |         | 0   | 0   | 4   | 4   | 0.17    |  |
| 7709986   | Uba2         | SUMO-activating enzyme subunit 2                                                   | 0   | 0   | 0   | 0   |         | 0   | 0   | 1   | 1   | 0.22    |  |
| 149269919 | LOC100044900 | SUMO-conjugating enzyme UBC9-like                                                  | 21  | 23  | 19  | 63  | 0.28    | 0   | 3   | 2   | 5   | 0.40    |  |
| 29789243  | Sun1         | SUN domain-containing protein 1                                                    | 3   | 2   | 10  | 15  | -0.20   | 93  | 166 | 156 | 415 | -0.12   |  |
| 168693641 | Sun2         | SUN domain-containing protein 2 isoform 3                                          | 42  | 57  | 68  | 167 | -0.06   | 325 | 282 | 338 | 945 | -0.15 * |  |
| 21312352  | Skiv2l2      | superkiller viralicidic activity 2-like 2                                          | 23  | 36  | 38  | 97  | 0.19    | 0   | 27  | 26  | 53  | 0.27    |  |
| 45597447  | Sod1         | superoxide dismutase [Cu-Zn]                                                       | 4   | 6   | 5   | 15  | 0.09    | 0   | 0   | 0   | 0   |         |  |
| 31980762  | Sod2         | superoxide dismutase [Mn], mitochondrial precursor                                 | 6   | 3   | 0   | 9   | -0.10   | 0   | 0   | 0   | 0   |         |  |
| 23956176  | Sugt1        | suppressor of G2 allele of SKP1 homolog                                            | 0   | 0   | 1   | 1   | -0.20   | 0   | 0   | 0   | 0   |         |  |
| 255683374 | Ppan         | suppressor of SWI4 1 homolog                                                       | 0   | 0   | 0   | 0   |         | 5   | 26  | 18  | 49  | 0.11 *  |  |
| 7363445   | St14         | suppressor of tumorigenicity 14 protein homolog                                    | 2   | 0   | 2   | 4   | -0.03   | 0   | 0   | 1   | 1   | 0.54 #  |  |
| 6755698   | Surf4        | surfeit locus protein 4                                                            | 4   | 2   | 2   | 8   | -0.36   | 11  | 2   | 2   | 15  | -0.36 * |  |
| 6678185   | Surf6        | surfeit locus protein 6                                                            | 0   | 0   | 0   | 0   |         | 1   | 6   | 10  | 17  | 0.67 #  |  |
| 28076967  | Supg1        | SURP and G-patch domain-containing protein 1                                       | 3   | 7   | 3   | 13  | 0.25    | 1   | 5   | 8   | 14  | -0.01   |  |
| 27369569  | Smndc1       | survival of motor neuron-related-splicing factor 30                                | 18  | 17  | 18  | 53  | -0.04   | 2   | 8   | 11  | 21  | 0.07    |  |
| 112421097 | Smarcc1      | SWI/SNF complex subunit SMARCC1                                                    | 96  | 124 | 114 | 334 | 0.29    | 42  | 64  | 49  | 155 | 0.30 *  |  |

|           |         |                                                                                                         |    |     |     |     |         |  |     |     |     |      |         |
|-----------|---------|---------------------------------------------------------------------------------------------------------|----|-----|-----|-----|---------|--|-----|-----|-----|------|---------|
| 37718972  | Smarcc2 | SWI/SNF complex subunit SMARCC2 isoform 3                                                               | 89 | 123 | 88  | 300 | 0.22    |  | 24  | 73  | 46  | 143  | 0.15    |
| 10181166  | Smarce1 | SWI/SNF-related matrix-associated actin-dependent regulator chromatin subfamily E member 1              | 47 | 37  | 41  | 125 | 0.28    |  | 33  | 43  | 23  | 99   | 0.24 *  |
| 40254124  | Smarca5 | SWI/SNF-related matrix-associated actin-dependent regulator of chromatin subfamily A member 5           | 76 | 89  | 59  | 224 | 0.08    |  | 262 | 426 | 482 | 1170 | -0.03   |
| 6755578   | Smarcb1 | SWI/SNF-related matrix-associated actin-dependent regulator of chromatin subfamily B member 1 isoform 1 | 12 | 13  | 19  | 44  | 0.20    |  | 0   | 14  | 0   | 14   | 0.03    |
| 24025565  | Smarcb1 | SWI/SNF-related matrix-associated actin-dependent regulator of chromatin subfamily B member 1 isoform 2 | 8  | 15  | 18  | 41  | 0.23    |  | 12  | 18  | 18  | 48   | 0.15    |
| 125347396 | Smarcd1 | SWI/SNF-related matrix-associated actin-dependent regulator of chromatin subfamily D member 1           | 12 | 12  | 12  | 36  | 0.14 *  |  | 0   | 6   | 0   | 6    | 0.05    |
| 194328771 | Smarcd2 | SWI/SNF-related matrix-associated actin-dependent regulator of chromatin subfamily D member 2 isoform 2 | 48 | 27  | 37  | 112 | 0.25 *  |  | 46  | 47  | 21  | 114  | 0.15    |
| 77404373  | Smarcd3 | SWI/SNF-related matrix-associated actin-dependent regulator of chromatin subfamily D member 3           | 4  | 0   | 6   | 10  | 0.15    |  | 0   | 4   | 0   | 4    | 0.32    |
| 11528488  | Hmg20b  | SWI/SNF-related matrix-associated actin-dependent regulator of chromatin subfamily E member 1-related   | 4  | 6   | 7   | 17  | 0.11    |  | 0   | 0   | 0   | 0    |         |
| 226437613 | Sympk   | symplekin                                                                                               | 69 | 124 | 89  | 282 | 0.21    |  | 4   | 45  | 28  | 77   | 0.09    |
| 33859662  | Vat1    | synaptic vesicle membrane protein VAT-1 homolog                                                         | 4  | 0   | 0   | 4   | -0.39   |  | 0   | 0   | 0   | 0    |         |
| 13384642  | Synj2bp | synaptojanin-2-binding protein                                                                          | 1  | 0   | 0   | 1   | -0.20   |  | 2   | 0   | 0   | 2    | -0.10   |
| 295317330 | Snap23  | synaptosomal-associated protein 23 isoform b                                                            | 0  | 4   | 4   | 8   | 0.69 #  |  | 0   | 1   | 0   | 1    | 0.91 #  |
| 21362303  | Snap47  | synaptosomal-associated protein 47                                                                      | 0  | 0   | 0   | 0   |         |  | 0   | 0   | 5   | 5    | 0.28    |
| 8394392   | Syt5    | synaptotagmin-5                                                                                         | 0  | 0   | 0   | 0   |         |  | 0   | 1   | 0   | 1    | 10.07 # |
| 6755438   | Sdc1    | syndecan-1 precursor                                                                                    | 0  | 1   | 0   | 1   | 0.68 #  |  | 0   | 0   | 1   | 1    | -0.29   |
| 6755442   | Sdc4    | syndecan-4 precursor                                                                                    | 0  | 0   | 0   | 0   |         |  | 0   | 2   | 4   | 6    | -0.09   |
| 268370185 | Stx5a   | syntaxin-5                                                                                              | 1  | 1   | 5   | 7   | -0.16   |  | 0   | 0   | 0   | 0    |         |
| 31560462  | Stx7    | syntaxin-7                                                                                              | 1  | 0   | 1   | 2   | 1.76 #  |  | 0   | 0   | 0   | 0    |         |
| 6755690   | Stxbp3a | syntaxin-binding protein 3                                                                              | 0  | 7   | 0   | 7   | -0.03   |  | 0   | 0   | 0   | 0    |         |
| 148277591 | Sdcbp   | syntenin-1 isoform 2                                                                                    | 0  | 2   | 2   | 4   | -0.13   |  | 0   | 0   | 0   | 0    |         |
| 19527184  | Taf5l   | TAF5-like RNA polymerase II p300/CBP-associated factor-associated factor 65 kDa subunit 5L              | 1  | 9   | 1   | 11  | 0.12    |  | 0   | 0   | 0   | 0    |         |
| 295317363 | Taf6l   | TAF6-like RNA polymerase II p300/CBP-associated factor-associated factor 65 kDa subunit 6L isoform 1    | 3  | 10  | 1   | 14  | 0.25    |  | 0   | 1   | 0   | 1    | 0.37    |
| 227116327 | Tln1    | talin-1                                                                                                 | 4  | 11  | 0   | 15  | 0.76 #  |  | 0   | 4   | 30  | 34   | 0.27    |
| 6678219   | Tapbp   | tapasin isoform 2                                                                                       | 1  | 1   | 0   | 2   | -0.61 # |  | 1   | 0   | 0   | 1    | 0.89 #  |
| 190014629 | Tprn    | taperin                                                                                                 | 8  | 13  | 3   | 24  | 0.35    |  | 0   | 0   | 1   | 1    | 0.49 #  |
| 21704096  | Tardbp  | TAR DNA-binding protein 43 isoform 1                                                                    | 65 | 90  | 115 | 270 | -0.10 * |  | 293 | 259 | 265 | 817  | -0.04   |
| 56682931  | Tardbp  | TAR DNA-binding protein 43 isoform 3                                                                    | 4  | 0   | 0   | 4   | 0.08    |  | 0   | 0   | 0   | 0    |         |
| 56682935  | Tardbp  | TAR DNA-binding protein 43 isoform 5                                                                    | 61 | 72  | 91  | 224 | -0.13 * |  | 0   | 0   | 0   | 0    |         |
| 21311839  | Toe1    | target of EGR1 protein 1                                                                                | 1  | 3   | 2   | 6   | -0.14   |  | 0   | 0   | 1   | 1    | -0.46 # |
| 6680624   | Acp5    | tartrate-resistant acid phosphatase type 5 precursor                                                    | 0  | 1   | 0   | 1   | -0.11   |  | 0   | 0   | 0   | 0    |         |
| 6755811   | Tbpl1   | TATA box-binding protein-like protein 1                                                                 | 0  | 1   | 0   | 1   | -0.13   |  | 0   | 0   | 1   | 1    | 0.04    |
| 123858774 | Btaf1   | TATA-binding protein-associated factor 172                                                              | 0  | 1   | 1   | 2   | 0.39    |  | 0   | 1   | 2   | 3    | 0.15    |
| 30794412  | Taf15   | TATA-binding protein-associated factor 2N                                                               | 11 | 12  | 14  | 37  | 0.08    |  | 16  | 15  | 20  | 51   | -0.06   |

|           |          |                                                                   |    |     |     |     |         |    |    |    |    |         |  |
|-----------|----------|-------------------------------------------------------------------|----|-----|-----|-----|---------|----|----|----|----|---------|--|
| 172073171 | Tbp      | TATA-box-binding protein                                          | 8  | 8   | 6   | 22  | -0.20 * | 2  | 7  | 2  | 11 | -0.16   |  |
| 21313140  | Tax1bp3  | tax1-binding protein 3                                            | 4  | 2   | 2   | 8   | -0.04   | 0  | 0  | 2  | 2  | -0.60 # |  |
| 167614490 | Tbc1d10b | TBC1 domain family member 10B                                     | 1  | 0   | 0   | 1   | -0.54   | 0  | 0  | 0  | 0  |         |  |
| 163644270 | Tbc1d4   | TBC1 domain family member 4                                       | 0  | 0   | 0   | 0   |         | 0  | 0  | 1  | 1  | 0.02    |  |
| 7304953   | Cd4      | T-cell surface glycoprotein CD4 precursor                         | 0  | 0   | 0   | 0   |         | 0  | 1  | 0  | 1  | 10.07 # |  |
| 13122606  | Tfpt     | TCF3 fusion partner homolog                                       | 0  | 0   | 1   | 1   | 0.41    | 0  | 0  | 0  | 0  |         |  |
| 110625624 | Tcp1     | T-complex protein 1 subunit alpha                                 | 4  | 12  | 11  | 27  | 0.05    | 2  | 8  | 9  | 19 | 0.19    |  |
| 126521835 | Cct2     | T-complex protein 1 subunit beta                                  | 14 | 10  | 33  | 57  | -0.05   | 0  | 27 | 29 | 56 | -0.01   |  |
| 6753322   | Cct4     | T-complex protein 1 subunit delta                                 | 10 | 12  | 12  | 34  | 0.11    | 2  | 21 | 21 | 44 | 0.15    |  |
| 6671702   | Cct5     | T-complex protein 1 subunit epsilon                               | 11 | 10  | 13  | 34  | -0.07   | 1  | 12 | 11 | 24 | -0.05   |  |
| 238814391 | Cct7     | T-complex protein 1 subunit eta                                   | 18 | 8   | 16  | 42  | -0.02   | 1  | 11 | 14 | 26 | -0.16 * |  |
| 6753320   | Cct3     | T-complex protein 1 subunit gamma                                 | 9  | 13  | 9   | 31  | 0.06    | 0  | 10 | 9  | 19 | -0.07   |  |
| 126723461 | Cct8     | T-complex protein 1 subunit theta                                 | 18 | 14  | 15  | 47  | 0.03    | 0  | 12 | 18 | 30 | -0.08   |  |
| 6753324   | Cct6a    | T-complex protein 1 subunit zeta                                  | 6  | 6   | 8   | 20  | 0.04    | 10 | 11 | 25 | 46 | -0.07   |  |
| 226693361 | Cct6b    | T-complex protein 1 subunit zeta-2                                | 0  | 0   | 2   | 2   | 0.03    | 0  | 0  | 2  | 2  | 0.12    |  |
| 146231944 | Rif1     | telomere-associated protein RIF1                                  | 90 | 72  | 89  | 251 | 0.05    | 3  | 19 | 4  | 26 | 0.49 #  |  |
| 6678287   | Terf1    | telomeric repeat-binding factor 1                                 | 4  | 0   | 0   | 4   | 0.05    | 1  | 1  | 0  | 2  | -0.07   |  |
| 133904142 | Terf2    | telomeric repeat-binding factor 2 isoform 1                       | 0  | 14  | 0   | 14  | -0.09   | 0  | 0  | 0  | 0  |         |  |
| 133904140 | Terf2    | telomeric repeat-binding factor 2 isoform 2                       | 8  | 7   | 11  | 26  | -0.20   | 1  | 5  | 5  | 11 | -0.29   |  |
| 160948575 | Terf2ip  | telomeric repeat-binding factor 2-interacting protein 1           | 11 | 16  | 8   | 35  | -0.14 * | 1  | 9  | 4  | 14 | -0.23   |  |
| 119372288 | Tenc1    | tensin-like C1 domain-containing phosphatase                      | 0  | 0   | 1   | 1   | 2.71 #  | 0  | 0  | 0  | 0  |         |  |
| 26892291  | Tinf2    | TERF1-interacting nuclear factor 2                                | 0  | 1   | 0   | 1   | -0.27   | 0  | 0  | 0  | 0  |         |  |
| 46395466  | Tes      | testin                                                            | 0  | 0   | 0   | 0   |         | 0  | 1  | 2  | 3  | -0.19   |  |
| 126090463 | Tex264   | testis expressed gene 264                                         | 1  | 0   | 0   | 1   | -0.02   | 0  | 0  | 0  | 0  |         |  |
| 124249335 | Tex10    | testis-expressed sequence 10 protein                              | 11 | 7   | 8   | 26  | 0.30 *  | 1  | 8  | 4  | 13 | 0.36    |  |
| 22122475  | Tspan8   | tetraspanin 8                                                     | 10 | 3   | 11  | 24  | -0.21 * | 0  | 1  | 3  | 4  | 0.16    |  |
| 22122345  | Tspan14  | tetraspanin-14                                                    | 3  | 2   | 3   | 8   | 0.49    | 0  | 0  | 0  | 0  |         |  |
| 22122703  | Tspan33  | tetraspanin-33                                                    | 0  | 0   | 2   | 2   | 0.54    | 0  | 0  | 0  | 0  |         |  |
| 124430551 | Ttc17    | tetratricopeptide repeat domain 17                                | 0  | 1   | 0   | 1   | 3.65 #  | 0  | 0  | 0  | 0  |         |  |
| 13385196  | Ttc35    | tetratricopeptide repeat protein 35                               | 11 | 8   | 6   | 25  | -0.39   | 9  | 4  | 7  | 20 | -0.03   |  |
| 110625776 | Ttc9c    | tetratricopeptide repeat protein 9C                               | 0  | 1   | 0   | 1   | 0.05    | 0  | 0  | 0  | 0  |         |  |
| 19526800  | Ercc3    | TFIIH basal transcription factor complex helicase XPB subunit     | 1  | 3   | 2   | 6   | 0.22    | 0  | 1  | 0  | 1  | -0.47 # |  |
| 31542614  | Ercc2    | TFIIH basal transcription factor complex helicase XPD subunit     | 3  | 8   | 2   | 13  | 0.29    | 0  | 0  | 0  | 0  |         |  |
| 6755911   | Txn1     | thioredoxin                                                       | 5  | 2   | 4   | 11  | 0.00    | 3  | 1  | 2  | 6  | 0.42    |  |
| 13384700  | Txndc12  | thioredoxin domain-containing protein 12 precursor                | 8  | 0   | 5   | 13  | -0.41   | 0  | 0  | 0  | 0  |         |  |
| 13386060  | Txndc17  | thioredoxin domain-containing protein 17                          | 1  | 1   | 2   | 4   | 0.39    | 0  | 0  | 2  | 2  | 0.14    |  |
| 13569841  | Txnrd1   | thioredoxin reductase 1, cytoplasmic isoform 2                    | 3  | 0   | 1   | 4   | 0.06    | 0  | 0  | 1  | 1  | 0.19    |  |
| 102468565 | Txnrd2   | thioredoxin reductase 2, mitochondrial precursor                  | 0  | 0   | 1   | 1   | -0.09   | 0  | 0  | 0  | 0  |         |  |
| 9903609   | Txn2     | thioredoxin, mitochondrial precursor                              | 1  | 0   | 0   | 1   | 0.22    | 0  | 0  | 0  | 0  |         |  |
| 6680690   | Prdx3    | thioredoxin-dependent peroxide reductase, mitochondrial precursor | 17 | 5   | 7   | 29  | -0.17   | 0  | 0  | 0  | 0  |         |  |
| 254553444 | Txnip    | thioredoxin-interacting protein isoform 2                         | 2  | 0   | 1   | 3   | -0.44   | 0  | 1  | 0  | 1  | 0.41    |  |
| 13384656  | Txnl4a   | thioredoxin-like protein 4A isoform a                             | 13 | 7   | 10  | 30  | -0.13 * | 0  | 0  | 0  | 0  |         |  |
| 109255210 | Txnl4a   | thioredoxin-like protein 4A isoform b                             | 0  | 0   | 0   | 0   |         | 3  | 2  | 2  | 7  | 0.07    |  |
| 33859722  | Tmx1     | thioredoxin-related transmembrane protein 1 precursor             | 11 | 0   | 4   | 15  | -0.44   | 7  | 0  | 1  | 8  | -0.92 # |  |
| 112817607 | Tmx4     | thioredoxin-related transmembrane protein 4 precursor             | 11 | 19  | 24  | 54  | -0.43   | 9  | 4  | 9  | 22 | -0.11   |  |
| 23956332  | Thoc1    | THO complex subunit 1                                             | 13 | 29  | 11  | 53  | -0.01   | 0  | 0  | 2  | 2  | 0.03    |  |
| 125656163 | Thoc2    | THO complex subunit 2                                             | 98 | 123 | 103 | 324 | 0.04    | 3  | 30 | 19 | 52 | -0.06   |  |
| 254553424 | Thoc3    | THO complex subunit 3                                             | 8  | 9   | 2   | 19  | 0.18    | 0  | 0  | 0  | 0  |         |  |

|           |          |                                                             |     |     |     |     |       |     |    |     |     |     |       |     |
|-----------|----------|-------------------------------------------------------------|-----|-----|-----|-----|-------|-----|----|-----|-----|-----|-------|-----|
| 6755763   | Thoc4    | THO complex subunit 4                                       | 66  | 69  | 49  | 184 | -0.10 |     | 70 | 38  | 48  | 156 | 0.05  |     |
| 27369587  | Thoc5    | THO complex subunit 5 homolog                               | 14  | 23  | 13  | 50  | 0.00  |     | 0  | 4   | 4   | 8   | -0.05 |     |
| 56605680  | Thoc6    | THO complex subunit 6 homolog                               | 31  | 38  | 25  | 94  | 0.06  |     | 1  | 5   | 1   | 7   | -0.09 |     |
| 13384834  | Thoc7    | THO complex subunit 7 homolog isoform 1                     | 17  | 28  | 16  | 61  | 0.03  |     | 0  | 10  | 5   | 15  | 0.05  |     |
| 227496421 | Tasp1    | threonine aspartase 1 isoform b                             | 1   | 0   | 1   | 2   | -0.11 |     | 0  | 0   | 0   | 0   |       |     |
| 27229277  | Tars     | threonyl-tRNA synthetase, cytoplasmic                       | 1   | 13  | 2   | 16  | -0.02 |     | 0  | 0   | 2   | 2   | -0.39 |     |
| 254692865 | Tars2    | threonyl-tRNA synthetase, mitochondrial isoform 1           | 0   | 12  | 13  | 25  | -0.07 |     | 0  | 0   | 0   | 0   |       |     |
| 254692871 | Tars2    | threonyl-tRNA synthetase, mitochondrial isoform 3           | 10  | 0   | 0   | 10  | -0.11 |     | 0  | 0   | 0   | 0   |       |     |
| 254692873 | Tars2    | threonyl-tRNA synthetase, mitochondrial isoform 4           | 0   | 0   | 0   | 0   |       |     | 0  | 1   | 1   | 2   | 4.88  | #   |
| 226958341 | Tk1      | thymidine kinase, cytosolic                                 | 0   | 0   | 0   | 0   |       |     | 0  | 1   | 2   | 3   | -0.14 |     |
| 157785665 | Dtymk    | thymidylate kinase isoform 1                                | 0   | 0   | 0   | 0   |       |     | 0  | 0   | 2   | 2   | 0.25  |     |
| 12963517  | Dtymk    | thymidylate kinase isoform 2                                | 0   | 0   | 0   | 0   |       |     | 0  | 1   | 0   | 1   | -0.58 | #   |
| 21362343  | Thyn1    | thymocyte nuclear protein 1                                 | 9   | 8   | 5   | 22  | -0.20 |     | 0  | 0   | 0   | 0   |       |     |
| 226531227 | Trip11   | thyroid hormone receptor interactor 11                      | 1   | 1   | 1   | 3   | -3.46 | #   | 0  | 0   | 0   | 0   |       |     |
| 91932791  | Trip12   | thyroid hormone receptor interactor 12                      | 105 | 151 | 81  | 337 | 0.03  |     | 41 | 127 | 140 | 308 | -0.08 |     |
| 68533246  | Thrap3   | thyroid hormone receptor-associated protein 3               | 41  | 62  | 49  | 152 | -0.23 |     | 73 | 114 | 115 | 302 | 0.02  |     |
| 254675277 | Tjp1     | tight junction protein ZO-1 isoform 1                       | 0   | 29  | 0   | 29  | 0.37  |     | 0  | 0   | 0   | 0   |       |     |
| 254675279 | Tjp1     | tight junction protein ZO-1 isoform 2                       | 12  | 1   | 17  | 30  | 0.55  |     | 1  | 3   | 7   | 11  | 0.91  | *,# |
| 160333863 | Tjp2     | tight junction protein ZO-2 isoform 2                       | 5   | 9   | 3   | 17  | 0.77  | *,# | 0  | 0   | 1   | 1   | 0.41  |     |
| 114052811 | Tjp3     | tight junction protein ZO-3                                 | 2   | 2   | 4   | 8   | 0.51  | *   | 1  | 9   | 18  | 28  | 0.58  | *,# |
| 21539617  | Tlcd1    | TLC domain-containing protein 1 precursor                   | 2   | 0   | 0   | 2   | -0.29 |     | 0  | 0   | 0   | 0   |       |     |
| 114842403 | Traf3    | TNF receptor-associated factor 3 isoform b                  | 0   | 1   | 0   | 1   | 3.53  | #   | 0  | 0   | 0   | 0   |       |     |
| 13591860  | Tollip   | toll-interacting protein                                    | 0   | 0   | 1   | 1   | 0.30  |     | 0  | 0   | 0   | 0   |       |     |
| 84875526  | Tom1l2   | TOM1-like protein 2 isoform c                               | 0   | 0   | 0   | 0   |       |     | 0  | 0   | 1   | 1   | 9.76  | #   |
| 229608944 | Tor1aip1 | torsin-1A-interacting protein 1 isoform 2                   | 17  | 17  | 26  | 60  | -0.26 |     | 11 | 21  | 23  | 55  | -0.14 |     |
| 31559990  | Tor1b    | torsin-1B precursor                                         | 3   | 0   | 0   | 3   | 3.06  | #   | 0  | 0   | 1   | 1   | -0.21 |     |
| 224809275 | Tor3a    | torsin-3A precursor                                         | 1   | 0   | 0   | 1   | 0.07  |     | 0  | 0   | 0   | 0   |       |     |
| 166706895 | Tox4     | TOX high mobility group box family member 4                 | 6   | 10  | 4   | 20  | 0.09  |     | 0  | 1   | 0   | 1   | 0.26  |     |
| 31560052  | Trp53rk  | TP53-regulating kinase                                      | 0   | 0   | 0   | 0   |       |     | 0  | 0   | 1   | 1   | -0.11 |     |
| 281427253 | Tprkb    | TP53RK-binding protein                                      | 0   | 1   | 1   | 2   | 0.18  |     | 0  | 0   | 0   | 0   |       |     |
| 88900517  | Tpx2     | TPX2, microtubule-associated protein homolog                | 0   | 2   | 2   | 4   | 0.16  |     | 0  | 0   | 0   | 0   |       |     |
| 66730565  | Trappc1  | trafficking protein particle complex subunit 1              | 3   | 0   | 2   | 5   | -0.58 | #   | 0  | 0   | 0   | 0   |       |     |
| 10946914  | Trappc2l | trafficking protein particle complex subunit 2-like protein | 1   | 0   | 0   | 1   | 0.00  |     | 0  | 0   | 0   | 0   |       |     |
| 7304929   | Trappc3  | trafficking protein particle complex subunit 3              | 3   | 2   | 6   | 11  | -0.15 |     | 0  | 0   | 0   | 0   |       |     |
| 11140825  | Trappc4  | trafficking protein particle complex subunit 4              | 0   | 0   | 2   | 2   | -0.71 | #   | 0  | 0   | 0   | 0   |       |     |
| 157266281 | Trappc5  | trafficking protein particle complex subunit 5              | 0   | 1   | 0   | 1   | -0.15 |     | 0  | 0   | 0   | 0   |       |     |
| 58037519  | Trappc6b | trafficking protein particle complex subunit 6B             | 2   | 0   | 0   | 2   | -0.30 |     | 0  | 0   | 0   | 0   |       |     |
| 226342960 | Tecr     | trans-2,3-enoyl-CoA reductase isoform 2                     | 10  | 15  | 9   | 34  | -0.36 | *   | 23 | 13  | 10  | 46  | -0.25 | *   |
| 227116358 | Mecr     | trans-2-enoyl-CoA reductase, mitochondrial precursor        | 12  | 9   | 10  | 31  | -0.15 |     | 0  | 0   | 0   | 0   |       |     |
| 6679951   | Gata3    | trans-acting T-cell-specific transcription factor GATA-3    | 2   | 7   | 1   | 10  | -0.27 | *   | 14 | 32  | 41  | 87  | 0.01  |     |
| 33859640  | Taldo1   | transaldolase                                               | 3   | 1   | 2   | 6   | 0.03  |     | 0  | 0   | 0   | 0   |       |     |
| 291463271 | Smarca4  | transcription activator BRG1 isoform 3                      | 165 | 195 | 147 | 507 | 0.24  |     | 65 | 208 | 146 | 419 | 0.13  | *   |
| 25140989  | Elof1    | transcription elongation factor 1 homolog                   | 4   | 2   | 3   | 9   | 0.00  |     | 0  | 0   | 0   | 0   |       |     |

|           |               |                                                       |    |    |    |     |          |  |    |     |     |     |         |
|-----------|---------------|-------------------------------------------------------|----|----|----|-----|----------|--|----|-----|-----|-----|---------|
| 6755728   | Tcea1         | transcription elongation factor A protein 1 isoform 2 | 26 | 0  | 0  | 26  | -0.19    |  | 0  | 0   | 0   | 0   |         |
| 229094709 | Tcea1         | transcription elongation factor A protein 1 isoform 3 | 0  | 22 | 13 | 35  | 0.21     |  | 0  | 5   | 3   | 8   | 0.42    |
| 149249090 | LOC100045866  | transcription elongation factor B polypeptide 1-like  | 9  | 8  | 6  | 23  | 0.11     |  | 3  | 2   | 2   | 7   | -0.07   |
| 13385800  | Tceb2         | transcription elongation factor B polypeptide 2       | 6  | 5  | 4  | 15  | 0.16 *   |  | 0  | 0   | 0   | 0   |         |
| 6678181   | Supt4h1       | transcription elongation factor SPT4 1                | 8  | 4  | 5  | 17  | 0.01     |  | 2  | 0   | 0   | 2   | 1.02 #  |
| 22094123  | Supt5h        | transcription elongation factor SPT5                  | 49 | 68 | 38 | 155 | 0.06 *   |  | 3  | 41  | 49  | 93  | 0.03    |
| 166091434 | Supt6h        | transcription elongation factor SPT6                  | 60 | 76 | 54 | 190 | 0.10     |  | 18 | 100 | 175 | 293 | 0.09    |
| 134053922 | 1110002N22Rik | transcription elongation factor, mitochondrial        | 8  | 11 | 8  | 27  | -0.04    |  | 0  | 0   | 0   | 0   |         |
| 87196334  | Tcerg1        | transcription elongation regulator 1                  | 50 | 60 | 53 | 163 | 0.22     |  | 0  | 8   | 0   | 8   | 0.58 #  |
| 166706889 | Tcf20         | transcription factor 20 isoform b                     | 0  | 0  | 0  | 0   |          |  | 0  | 4   | 11  | 15  | 0.24    |
| 218931186 | Tcf712        | transcription factor 7-like 2 isoform 4               | 0  | 1  | 1  | 2   | -0.30    |  | 0  | 0   | 1   | 1   | 0.03    |
| 6678303   | Tfam          | transcription factor A, mitochondrial precursor       | 28 | 44 | 28 | 100 | -0.08    |  | 4  | 15  | 14  | 33  | -0.01   |
| 31981462  | Tcfap2a       | transcription factor AP-2-alpha isoform a             | 0  | 20 | 0  | 20  | -0.20    |  | 0  | 5   | 0   | 5   | 0.00    |
| 171846238 | Tcfap2a       | transcription factor AP-2-alpha isoform b             | 12 | 0  | 8  | 20  | -0.21    |  | 6  | 11  | 12  | 29  | -0.35 * |
| 23346597  | Tcfap2d       | transcription factor AP-2-delta                       | 0  | 1  | 0  | 1   | -0.65 #  |  | 0  | 1   | 1   | 2   | -0.70 # |
| 13626034  | Tcfap4        | transcription factor AP-4                             | 1  | 0  | 0  | 1   | 2.12 #   |  | 0  | 1   | 0   | 1   | -1.35 # |
| 29789195  | Btf3l4        | transcription factor BTF3 homolog 4                   | 2  | 2  | 3  | 7   | -0.20    |  | 0  | 0   | 0   | 0   |         |
| 281485611 | Btf3          | transcription factor BTF3 isoform 2                   | 6  | 13 | 11 | 30  | -0.17    |  | 0  | 0   | 0   | 0   |         |
| 134053939 | Tcfcp2l1      | transcription factor CP2-like protein 1               | 17 | 15 | 8  | 40  | -0.33    |  | 0  | 14  | 7   | 21  | -0.03   |
| 6678305   | Tfdp1         | transcription factor Dp-1                             | 2  | 4  | 1  | 7   | 0.49 *   |  | 0  | 0   | 0   | 0   |         |
| 6680512   | Junb          | transcription factor jun-B                            | 2  | 1  | 1  | 4   | 1.86 * # |  | 0  | 0   | 1   | 1   | 3.21 #  |
| 6754404   | Jund          | transcription factor jun-D                            | 8  | 6  | 4  | 18  | 0.10     |  | 0  | 1   | 1   | 2   | 1.68 #  |
| 6754608   | Maff          | transcription factor MafF                             | 1  | 1  | 2  | 4   | 0.48 *   |  | 0  | 0   | 0   | 0   |         |
| 6754610   | Mafg          | transcription factor MafG                             | 2  | 2  | 0  | 4   | 0.03     |  | 0  | 2   | 4   | 6   | -0.15   |
| 6754612   | Mafk          | transcription factor MafK                             | 1  | 0  | 0  | 1   | 0.88 #   |  | 0  | 1   | 1   | 2   | 0.44    |
| 34328189  | Rfx3          | transcription factor RFX3                             | 0  | 4  | 0  | 4   | -0.28    |  | 0  | 0   | 0   | 0   |         |
| 56118239  | Sox4          | transcription factor SOX-4                            | 1  | 6  | 5  | 12  | -0.27 *  |  | 1  | 0   | 3   | 4   | 0.30    |
| 119226255 | Sp1           | transcription factor Sp1                              | 3  | 2  | 2  | 7   | 0.29 *   |  | 0  | 1   | 0   | 1   | 0.02    |
| 125625320 | Sp2           | transcription factor Sp2 isoform 2                    | 1  | 0  | 0  | 1   | 0.28     |  | 0  | 0   | 0   | 0   |         |
| 148536867 | Sp3           | transcription factor Sp3 isoform 2                    | 6  | 5  | 1  | 12  | 0.03     |  | 0  | 0   | 0   | 0   |         |
| 149262290 | LOC100046289  | transcription initiation factor IIA subunit 2-like    | 0  | 1  | 0  | 1   | 0.24     |  | 0  | 0   | 0   | 0   |         |
| 21704076  | Gtf2b         | transcription initiation factor IIB                   | 20 | 20 | 12 | 52  | -0.06    |  | 0  | 0   | 4   | 4   | 0.11    |
| 124486596 | Taf1          | transcription initiation factor TFIID subunit 1       | 1  | 8  | 6  | 15  | 0.55     |  | 0  | 0   | 0   | 0   |         |
| 46518499  | Taf10         | transcription initiation factor TFIID subunit 10      | 5  | 5  | 7  | 17  | 0.42     |  | 0  | 1   | 1   | 2   | 0.08    |
| 30794436  | Taf11         | transcription initiation factor TFIID subunit 11      | 8  | 11 | 4  | 23  | 0.12     |  | 0  | 0   | 0   | 0   |         |
| 227330588 | Taf12         | transcription initiation factor TFIID subunit 12      | 0  | 1  | 0  | 1   | 0.08     |  | 0  | 0   | 0   | 0   |         |
| 20270192  | Taf13         | transcription initiation factor TFIID subunit 13      | 2  | 1  | 0  | 3   | -0.09    |  | 0  | 0   | 0   | 0   |         |
| 124486849 | Taf2          | transcription initiation factor TFIID subunit 2       | 13 | 13 | 9  | 35  | 0.38     |  | 0  | 0   | 0   | 0   |         |
| 262231748 | Taf3          | transcription initiation factor TFIID subunit 3       | 0  | 1  | 0  | 1   | -1.22 #  |  | 0  | 0   | 0   | 0   |         |
| 124487354 | Taf4a         | transcription initiation factor TFIID subunit 4       | 5  | 11 | 10 | 26  | 0.33     |  | 0  | 0   | 0   | 0   |         |
| 110665722 | Taf5          | transcription initiation factor TFIID subunit 5       | 3  | 13 | 3  | 19  | 0.30     |  | 0  | 2   | 0   | 2   | 0.23    |
| 6678215   | Taf6          | transcription initiation factor TFIID subunit 6       | 3  | 21 | 10 | 34  | -0.39    |  | 0  | 0   | 0   | 0   |         |



|           |         |                                                                 |     |     |     |     |         |  |     |     |     |     |          |
|-----------|---------|-----------------------------------------------------------------|-----|-----|-----|-----|---------|--|-----|-----|-----|-----|----------|
| 28461141  | Taf7    | transcription initiation factor TFIID subunit 7 isoform 1       | 1   | 2   | 0   | 3   | 0.09    |  | 0   | 0   | 0   | 0   |          |
| 11528498  | Taf8    | transcription initiation factor TFIID subunit 8                 | 1   | 5   | 2   | 8   | 0.20    |  | 0   | 0   | 0   | 0   |          |
| 30520009  | Supt3h  | transcription initiation protein SPT3 homolog                   | 1   | 7   | 6   | 14  | 0.28 *  |  | 0   | 2   | 0   | 2   | 0.51 #   |
| 94420998  | Trim24  | transcription intermediary factor 1-alpha                       | 0   | 0   | 0   | 0   |         |  | 0   | 0   | 1   | 1   | 0.05     |
| 170295840 | Trim28  | transcription intermediary factor 1-beta                        | 98  | 76  | 76  | 250 | 0.25 *  |  | 148 | 189 | 207 | 544 | 0.11     |
| 111154070 | Ttf1    | transcription termination factor 1                              | 0   | 0   | 0   | 0   |         |  | 0   | 4   | 7   | 11  | 0.16     |
| 6679573   | Pura    | transcriptional activator protein Pur-alpha                     | 5   | 5   | 9   | 19  | -0.08   |  | 0   | 1   | 1   | 2   | -0.04    |
| 6755252   | Purb    | transcriptional activator protein Pur-beta                      | 12  | 10  | 12  | 34  | -0.09 * |  | 1   | 4   | 6   | 11  | -0.05    |
| 21313610  | Tada1   | transcriptional adapter 1                                       | 1   | 1   | 3   | 5   | 0.31    |  | 0   | 0   | 0   | 0   |          |
| 27369796  | Tada2a  | transcriptional adapter 2-alpha                                 | 0   | 2   | 0   | 2   | -0.14   |  | 0   | 0   | 0   | 0   |          |
| 20149314  | Tada3   | transcriptional adapter 3                                       | 4   | 10  | 4   | 18  | 0.20    |  | 0   | 1   | 0   | 1   | -1.04 #  |
| 298676444 | Tada2b  | transcriptional adaptor 2B                                      | 1   | 0   | 1   | 2   | 0.24    |  | 0   | 0   | 0   | 0   |          |
| 262205252 | Tead1   | transcriptional enhancer factor TEF-1 isoform 3                 | 1   | 4   | 2   | 7   | 0.08    |  | 0   | 3   | 0   | 3   | -0.03    |
| 148352316 | Tead4   | transcriptional enhancer factor TEF-3 isoform b                 | 0   | 0   | 0   | 0   |         |  | 0   | 1   | 0   | 1   | -0.29    |
| 196049389 | Tead3   | transcriptional enhancer factor TEF-5 isoform 2                 | 7   | 8   | 0   | 15  | -0.02   |  | 0   | 2   | 0   | 2   | 0.62 #   |
| 154091016 | Atrx    | transcriptional regulator ATRX                                  | 0   | 2   | 2   | 4   | 0.14    |  | 40  | 70  | 103 | 213 | 0.07     |
| 118442832 | Zbtb33  | transcriptional regulator Kaiso                                 | 0   | 1   | 0   | 1   | 0.23    |  | 0   | 0   | 0   | 0   |          |
| 31044459  | Ctcf    | transcriptional repressor CTCF                                  | 36  | 37  | 26  | 99  | 0.13    |  | 74  | 150 | 119 | 343 | -0.11 *  |
| 164519132 | Gatad2a | transcriptional repressor p66 alpha isoform b                   | 17  | 25  | 17  | 59  | 0.21    |  | 10  | 25  | 10  | 45  | 0.34     |
| 21314854  | Gatad2b | transcriptional repressor p66-beta                              | 16  | 21  | 19  | 56  | 0.40    |  | 11  | 23  | 5   | 39  | 0.46 *,# |
| 31982421  | Yy1     | transcriptional repressor protein YY1                           | 6   | 7   | 1   | 14  | 0.08    |  | 0   | 0   | 0   | 0   |          |
| 31543845  | Tbl2    | transducin beta-like protein 2                                  | 5   | 3   | 1   | 9   | -0.41 * |  | 0   | 1   | 0   | 1   | -0.35    |
| 30102935  | Tbl3    | transducin beta-like protein 3                                  | 3   | 7   | 7   | 17  | -0.01   |  | 34  | 90  | 141 | 265 | -0.05    |
| 124486949 | Trrap   | transformation/transcription domain-associated protein          | 196 | 374 | 167 | 737 | 0.26 *  |  | 5   | 124 | 144 | 273 | 0.25 *   |
| 111160869 | Tra2a   | transformer-2 protein homolog alpha                             | 6   | 6   | 6   | 18  | -0.03   |  | 34  | 26  | 25  | 85  | -0.07    |
| 6677975   | Tra2b   | transformer-2 protein homolog beta                              | 16  | 22  | 15  | 53  | -0.05   |  | 116 | 67  | 62  | 245 | -0.10    |
| 31542143  | Rhoa    | transforming protein RhoA precursor                             | 14  | 7   | 6   | 27  | -0.08   |  | 5   | 5   | 10  | 20  | -0.06    |
| 30519911  | Tagln2  | transgelin-2                                                    | 28  | 26  | 24  | 78  | 0.07    |  | 4   | 1   | 13  | 18  | 0.61 #   |
| 225543319 | Vcp     | transitional endoplasmic reticulum ATPase                       | 16  | 11  | 13  | 40  | -0.15 * |  | 7   | 7   | 17  | 31  | -0.04    |
| 6678359   | Tkt     | transketolase                                                   | 18  | 20  | 17  | 55  | -0.01   |  | 43  | 47  | 92  | 182 | 0.02     |
| 148287022 | Tktl2   | transketolase-like protein 2                                    | 0   | 2   | 2   | 4   | 0.53    |  | 0   | 0   | 2   | 2   | 0.19     |
| 21703744  | Eif2b1  | translation initiation factor eIF-2B subunit alpha              | 0   | 0   | 0   | 0   |         |  | 0   | 0   | 2   | 2   | 0.17     |
| 110625866 | Mtif2   | translation initiation factor IF-2, mitochondrial precursor     | 1   | 3   | 4   | 8   | -0.07   |  | 0   | 0   | 1   | 1   | -0.21    |
| 21313176  | Mtif3   | translation initiation factor IF-3, mitochondrial precursor     | 1   | 0   | 1   | 2   | -1.48 # |  | 0   | 0   | 0   | 0   |          |
| 6678437   | Tpt1    | translationally-controlled tumor protein                        | 13  | 20  | 16  | 49  | 0.01    |  | 2   | 7   | 12  | 21  | 0.27     |
| 6755899   | Tsn     | translin                                                        | 3   | 2   | 0   | 5   | 0.24    |  | 0   | 1   | 0   | 1   | 0.30     |
| 30794386  | Tram1   | translocating chain-associated membrane protein 1               | 3   | 0   | 0   | 3   | -0.04   |  | 3   | 1   | 2   | 6   | -0.64 #  |
| 39930429  | Sec62   | translocation protein SEC62                                     | 2   | 2   | 2   | 6   | -0.25   |  | 3   | 2   | 2   | 7   | -0.24 *  |
| 158937300 | Sec63   | translocation protein SEC63 homolog                             | 1   | 1   | 2   | 4   | -0.13   |  | 0   | 0   | 0   | 0   |          |
| 165377206 | Ssr1    | translocon-associated protein subunit alpha precursor           | 6   | 5   | 4   | 15  | -0.59 # |  | 21  | 5   | 4   | 30  | -0.23 *  |
| 6678145   | Ssr4    | translocon-associated protein subunit delta isoform 2 precursor | 8   | 18  | 8   | 34  | -0.34 * |  | 22  | 8   | 7   | 37  | -0.29 *  |
| 21312968  | Ssr3    | translocon-associated protein subunit gamma                     | 4   | 3   | 4   | 11  | -0.32   |  | 12  | 4   | 4   | 20  | -0.26 *  |
| 87116677  | Tmco1   | transmembrane and coiled-coil domain-containing protein 1       | 1   | 6   | 0   | 7   | -0.44   |  | 0   | 3   | 4   | 7   | -0.30    |

|           |               |                                                                                    |    |    |    |     |           |     |     |     |      |           |
|-----------|---------------|------------------------------------------------------------------------------------|----|----|----|-----|-----------|-----|-----|-----|------|-----------|
| 254939557 | 1110021J02Rik | transmembrane and coiled-coil domain-containing protein C6orf129 homolog isoform 2 | 2  | 0  | 2  | 4   | -0.38     | 0   | 0   | 0   | 0    |           |
| 85362703  | Tmed1         | transmembrane emp24 domain-containing protein 1 precursor                          | 1  | 0  | 0  | 1   | -1.27 #   | 0   | 0   | 0   | 0    |           |
| 21312062  | Tmed10        | transmembrane emp24 domain-containing protein 10 precursor                         | 21 | 19 | 18 | 58  | -0.43     | 44  | 9   | 24  | 77   | -0.27 *   |
| 149259896 | Gm10698       | transmembrane emp24 domain-containing protein 2-like                               | 14 | 6  | 6  | 26  | -0.34     | 10  | 6   | 7   | 23   | -0.06     |
| 19527236  | Tmed4         | transmembrane emp24 domain-containing protein 4 precursor                          | 4  | 0  | 5  | 9   | -0.32     | 0   | 0   | 5   | 5    | -0.20     |
| 21746165  | Tmed5         | transmembrane emp24 domain-containing protein 5 precursor                          | 2  | 2  | 3  | 7   | -0.35 *   | 5   | 2   | 3   | 10   | -0.32     |
| 145966911 | Tmed9         | transmembrane emp24 domain-containing protein 9 precursor                          | 7  | 7  | 6  | 20  | -0.59 *,# | 13  | 7   | 6   | 26   | -0.18     |
| 255003819 | Tmed7         | transmembrane emp24 protein transport domain containing 7                          | 0  | 0  | 0  | 0   |           | 0   | 1   | 1   | 2    | -0.28     |
| 41235747  | Tmem106c      | transmembrane protein 106C                                                         | 0  | 0  | 1  | 1   | 0.02      | 0   | 0   | 0   | 0    |           |
| 19527378  | Tmem109       | transmembrane protein 109 precursor                                                | 6  | 2  | 4  | 12  | -0.30 *   | 9   | 1   | 3   | 13   | -0.15     |
| 28827824  | Tmem111       | transmembrane protein 111                                                          | 7  | 5  | 5  | 17  | -0.31     | 5   | 4   | 2   | 11   | -0.17     |
| 120952692 | Tmem147       | transmembrane protein 147                                                          | 2  | 0  | 0  | 2   | -0.41     | 0   | 0   | 0   | 0    |           |
| 13384766  | Tmem14c       | transmembrane protein 14C                                                          | 6  | 1  | 3  | 10  | -0.33     | 11  | 0   | 1   | 12   | 0.13      |
| 160333150 | Tmem188       | transmembrane protein 188                                                          | 1  | 1  | 2  | 4   | -0.28 *   | 0   | 0   | 0   | 0    |           |
| 19526846  | Tmem19        | transmembrane protein 19                                                           | 2  | 0  | 0  | 2   | -0.27     | 0   | 0   | 0   | 0    |           |
| 68342040  | Tmem201       | transmembrane protein 201 isoform b                                                | 0  | 0  | 0  | 0   |           | 8   | 8   | 10  | 26   | 0.03      |
| 31982159  | Tmem205       | transmembrane protein 205                                                          | 2  | 3  | 2  | 7   | -0.29     | 4   | 3   | 2   | 9    | -0.19     |
| 13384906  | Tmem208       | transmembrane protein 208                                                          | 1  | 0  | 2  | 3   | 0.03      | 0   | 0   | 0   | 0    |           |
| 40254356  | Tmem209       | transmembrane protein 209                                                          | 5  | 0  | 1  | 6   | 0.22      | 0   | 17  | 11  | 28   | 0.05      |
| 31559970  | Tmem214       | transmembrane protein 214                                                          | 18 | 14 | 5  | 37  | -0.04     | 0   | 2   | 0   | 2    | -0.23     |
| 68533251  | Tmem33        | transmembrane protein 33 isoform 2                                                 | 5  | 5  | 3  | 13  | -0.18     | 2   | 2   | 3   | 7    | -0.22     |
| 21311891  | Tmem43        | transmembrane protein 43                                                           | 0  | 1  | 0  | 1   | -0.36     | 15  | 20  | 23  | 58   | -0.26 *   |
| 13386014  | Tmem85        | transmembrane protein 85                                                           | 3  | 4  | 2  | 9   | -0.42     | 1   | 3   | 2   | 6    | -0.59 *,# |
| 13384684  | Tmem93        | transmembrane protein 93                                                           | 0  | 1  | 0  | 1   | -0.61 #   | 0   | 0   | 0   | 0    |           |
| 19526880  | Tmem97        | transmembrane protein 97                                                           | 1  | 0  | 0  | 1   | -0.19     | 0   | 0   | 0   | 0    |           |
| 224967102 | 2010011I20Rik | transmembrane protein C20orf108 homolog                                            | 1  | 0  | 0  | 1   | -0.40     | 0   | 0   | 0   | 0    |           |
| 188497646 | 4930471M23Rik | transmembrane protein C2orf18 homolog precursor                                    | 0  | 0  | 0  | 0   |           | 0   | 0   | 1   | 1    | -0.09     |
| 21312800  | 5033414D02Rik | transmembrane protein C9orf46 homolog                                              | 0  | 1  | 0  | 1   | 0.56      | 0   | 0   | 0   | 0    |           |
| 115385966 | Tnpo1         | transportin-1 isoform 2                                                            | 0  | 0  | 0  | 0   |           | 0   | 1   | 3   | 4    | -0.66 #   |
| 54312056  | Tnpo3         | transportin-3                                                                      | 0  | 2  | 1  | 3   | 0.45      | 0   | 2   | 2   | 4    | -0.05     |
| 6755742   | Tcof1         | treacle protein isoform 2                                                          | 53 | 68 | 38 | 159 | 0.07      | 3   | 8   | 15  | 26   | 0.12      |
| 10946884  | Treh          | trehalase precursor                                                                | 0  | 0  | 2  | 2   | 0.45      | 0   | 0   | 1   | 1    | 0.29      |
| 33859811  | Hadha         | trifunctional enzyme subunit alpha, mitochondrial precursor                        | 52 | 57 | 48 | 157 | -0.06     | 65  | 43  | 42  | 150  | -0.05     |
| 21704100  | Hadhb         | trifunctional enzyme subunit beta, mitochondrial precursor                         | 24 | 26 | 21 | 71  | -0.19     | 3   | 7   | 8   | 18   | -0.23     |
| 93102415  | Gart          | trifunctional purine biosynthetic protein adenosine-3                              | 0  | 0  | 0  | 0   |           | 0   | 1   | 9   | 10   | -0.36     |
| 88501745  | Triobp        | TRIO and F-actin-binding protein isoform 1                                         | 5  | 12 | 1  | 18  | 0.48      | 0   | 0   | 0   | 0    |           |
| 226958349 | Tpi1          | triosephosphate isomerase                                                          | 41 | 47 | 73 | 161 | -0.12     | 396 | 196 | 414 | 1006 | -0.18     |
| 6753448   | Tpp1          | tripeptidyl-peptidase 1 precursor                                                  | 2  | 5  | 7  | 14  | 0.15      | 1   | 3   | 7   | 11   | 0.13      |
| 6678419   | Tpp2          | tripeptidyl-peptidase 2                                                            | 0  | 0  | 4  | 4   | 0.09      | 0   | 0   | 0   | 0    |           |
| 295054316 | Nsun2         | tRNA (cytosine-5-)-methyltransferase NSUN2                                         | 12 | 19 | 11 | 42  | 0.13      | 0   | 4   | 10  | 14   | -0.12     |
| 224994263 | Trpt1         | tRNA 2'-phosphotransferase 1                                                       | 1  | 2  | 0  | 3   | -0.05     | 0   | 0   | 0   | 0    |           |
| 309265174 | LOC100503161  | tRNA methyltransferase 112 homolog                                                 | 6  | 2  | 2  | 10  | 0.01      | 0   | 3   | 0   | 3    | -0.69 #   |
| 70906472  | Pus1          | tRNA pseudouridine synthase A, mitochondrial isoform 3                             | 0  | 0  | 0  | 0   |           | 0   | 1   | 0   | 1    | -0.73 #   |

|           |           |                                                                       |     |     |     |     |         |     |     |     |      |          |  |
|-----------|-----------|-----------------------------------------------------------------------|-----|-----|-----|-----|---------|-----|-----|-----|------|----------|--|
| 241896974 | Pusl1     | tRNA pseudouridine synthase-like 1                                    | 1   | 0   | 0   | 1   | -0.14   | 0   | 0   | 0   | 0    |          |  |
| 255003775 | Dus3l     | tRNA-dihydrouridine synthase 3-like                                   | 0   | 3   | 1   | 4   | 0.23    | 0   | 0   | 0   | 0    |          |  |
| 228008361 | Tsen15    | tRNA-splicing endonuclease subunit Sen15                              | 0   | 1   | 0   | 1   | -0.09   | 0   | 0   | 0   | 0    |          |  |
| 255958183 | Tsen34    | tRNA-splicing endonuclease subunit Sen34 isoform a                    | 0   | 0   | 0   | 0   |         | 0   | 0   | 1   | 1    | -0.20    |  |
| 255958185 | Tsen34    | tRNA-splicing endonuclease subunit Sen34 isoform b                    | 0   | 0   | 0   | 0   |         | 0   | 0   | 2   | 2    | 0.20     |  |
| 21703842  | D10Wsu52e | tRNA-splicing ligase RtcB homolog                                     | 19  | 21  | 21  | 61  | -0.06   | 3   | 5   | 8   | 16   | -0.11    |  |
| 8394460   | Tmod3     | tropomodulin-3                                                        | 13  | 18  | 16  | 47  | 0.24    | 3   | 18  | 14  | 35   | 0.30 *   |  |
| 256000796 | Tpm1      | tropomyosin alpha-1 chain isoform 10                                  | 0   | 0   | 0   | 0   |         | 2   | 0   | 0   | 2    | 0.11     |  |
| 256000784 | Tpm1      | tropomyosin alpha-1 chain isoform 4                                   | 6   | 6   | 9   | 21  | -0.12   | 0   | 0   | 0   | 0    |          |  |
| 256000788 | Tpm1      | tropomyosin alpha-1 chain isoform 6                                   | 0   | 0   | 0   | 0   |         | 0   | 1   | 0   | 1    | 0.11     |  |
| 256000790 | Tpm1      | tropomyosin alpha-1 chain isoform 7                                   | 12  | 11  | 6   | 29  | -0.04   | 0   | 0   | 0   | 0    |          |  |
| 40254525  | Tpm3      | tropomyosin alpha-3 chain                                             | 7   | 19  | 10  | 36  | -0.02   | 0   | 3   | 3   | 6    | -0.22    |  |
| 47894398  | Tpm4      | tropomyosin alpha-4 chain                                             | 14  | 10  | 8   | 32  | -0.08   | 0   | 1   | 2   | 3    | -0.22    |  |
| 11875203  | Tpm2      | tropomyosin beta chain                                                | 0   | 6   | 0   | 6   | 0.19    | 0   | 0   | 0   | 0    |          |  |
| 84781771  | Try10     | trypsin 10                                                            | 0   | 0   | 0   | 0   |         | 43  | 36  | 14  | 93   | -2.52 #  |  |
| 224809300 | Tubal3    | tubulin alpha chain-like 3                                            | 0   | 0   | 0   | 0   |         | 0   | 4   | 2   | 6    | -0.29    |  |
| 6755901   | Tuba1a    | tubulin alpha-1A chain                                                | 5   | 0   | 0   | 5   | 0.64 #  | 99  | 39  | 388 | 526  | -0.06    |  |
| 34740335  | Tuba1b    | tubulin alpha-1B chain                                                | 15  | 0   | 26  | 41  | 0.27    | 160 | 276 | 536 | 972  | -0.13    |  |
| 82930689  | Gm5620    | tubulin alpha-1B chain isoform 4                                      | 0   | 13  | 0   | 13  | 0.18    | 0   | 0   | 0   | 0    |          |  |
| 6678469   | Tuba1c    | tubulin alpha-1C chain                                                | 6   | 0   | 0   | 6   | 0.81 #  | 116 | 36  | 480 | 632  | -0.10    |  |
| 6678467   | Tuba4a    | tubulin alpha-4A chain                                                | 12  | 0   | 0   | 12  | 0.79 #  | 0   | 48  | 306 | 354  | -0.30    |  |
| 33859488  | Tubb2a    | tubulin beta-2A chain                                                 | 0   | 0   | 0   | 0   |         | 0   | 38  | 135 | 173  | -0.22    |  |
| 21746161  | Tubb2b    | tubulin beta-2B chain                                                 | 7   | 0   | 0   | 7   | 0.68 #  | 63  | 37  | 121 | 221  | -0.04    |  |
| 22165384  | Tubb2c    | tubulin beta-2C chain                                                 | 14  | 7   | 18  | 39  | 0.32    | 58  | 80  | 325 | 463  | -0.04    |  |
| 12963615  | Tubb3     | tubulin beta-3 chain                                                  | 5   | 7   | 0   | 12  | 0.40    | 36  | 25  | 178 | 239  | -0.11    |  |
| 31981939  | Tubb4     | tubulin beta-4 chain                                                  | 9   | 0   | 15  | 24  | 0.22    | 49  | 67  | 298 | 414  | -0.03    |  |
| 7106439   | Tubb5     | tubulin beta-5 chain                                                  | 13  | 11  | 20  | 44  | 0.25    | 117 | 131 | 462 | 710  | -0.02    |  |
| 27754056  | Tubb6     | tubulin beta-6 chain                                                  | 0   | 2   | 0   | 2   | 0.28    | 21  | 30  | 159 | 210  | -0.02    |  |
| 19527242  | Tubg1     | tubulin gamma-1 chain                                                 | 0   | 1   | 0   | 1   | 0.03    | 0   | 0   | 0   | 0    |          |  |
| 269954711 | Ttl12     | tubulin--tyrosine ligase-like protein 12                              | 0   | 0   | 0   | 0   |         | 0   | 0   | 1   | 1    | -1.27 #  |  |
| 10190660  | Tfip11    | tuftelin-interacting protein 11                                       | 3   | 3   | 7   | 13  | 0.22 *  | 0   | 3   | 2   | 5    | 0.16     |  |
| 295444883 | Tnfaip8   | tumor necrosis factor alpha-induced protein 8 isoform 3               | 0   | 0   | 1   | 1   | -0.22   | 0   | 0   | 0   | 0    |          |  |
| 75677522  | Tradd     | tumor necrosis factor receptor type 1-associated DEATH domain protein | 0   | 0   | 0   | 0   |         | 0   | 0   | 1   | 1    | -0.43    |  |
| 6678407   | Tpd52     | tumor protein D52 isoform 5                                           | 4   | 1   | 1   | 6   | -0.06   | 0   | 0   | 0   | 0    |          |  |
| 6678409   | Tpd52l1   | tumor protein D53                                                     | 1   | 0   | 0   | 1   | -6.15 # | 0   | 0   | 0   | 0    |          |  |
| 124248487 | Tusc3     | tumor suppressor candidate 3                                          | 4   | 8   | 2   | 14  | -0.17   | 0   | 3   | 1   | 4    | -0.26    |  |
| 160333077 | Trp53bp1  | tumor suppressor p53-binding protein 1                                | 170 | 347 | 172 | 689 | 0.27    | 5   | 27  | 6   | 38   | -0.13 *  |  |
| 31560359  | Tacstd2   | tumor-associated calcium signal transducer 2 precursor                | 1   | 0   | 1   | 2   | 0.45    | 0   | 0   | 0   | 0    |          |  |
| 62990169  | Twf1      | twinfilin-1                                                           | 9   | 5   | 4   | 18  | -0.07   | 0   | 0   | 4   | 4    | -0.34    |  |
| 6755224   | Twf2      | twinfilin-2                                                           | 3   | 1   | 0   | 4   | 0.50    | 0   | 0   | 0   | 0    |          |  |
| 170295818 | Baz1b     | tyrosine-protein kinase BAZ1B                                         | 82  | 85  | 38  | 205 | 0.03    | 197 | 376 | 541 | 1114 | -0.14 *  |  |
| 31560712  | Csk       | tyrosine-protein kinase CSK                                           | 0   | 1   | 0   | 1   | 0.17    | 0   | 0   | 0   | 0    |          |  |
| 111607496 | Jak1      | tyrosine-protein kinase JAK1                                          | 0   | 0   | 0   | 0   |         | 0   | 0   | 1   | 1    | -0.03    |  |
| 7106355   | Mertk     | tyrosine-protein kinase Mer precursor                                 | 0   | 0   | 0   | 0   |         | 0   | 0   | 1   | 1    | -10.24 # |  |
| 133505845 | Ptpn1     | tyrosine-protein phosphatase non-receptor type 1                      | 0   | 0   | 0   | 0   |         | 1   | 0   | 0   | 1    | 0.16     |  |
| 134948762 | Ptpn13    | tyrosine-protein phosphatase non-receptor type 13                     | 1   | 2   | 0   | 3   | 0.14    | 0   | 0   | 1   | 1    | 0.07     |  |
| 118130771 | Ptpn6     | tyrosine-protein phosphatase non-receptor type 6 isoform a            | 3   | 6   | 0   | 9   | 0.41    | 0   | 1   | 0   | 1    | 0.27     |  |
| 61098100  | Ptpn9     | tyrosine-protein phosphatase non-receptor type 9                      | 1   | 0   | 1   | 2   | -0.44 * | 0   | 0   | 0   | 0    |          |  |

|           |               |                                                         |     |     |     |     |         |  |     |     |     |      |         |
|-----------|---------------|---------------------------------------------------------|-----|-----|-----|-----|---------|--|-----|-----|-----|------|---------|
| 162417986 | Tdp1          | tyrosyl-DNA phosphodiesterase 1                         | 1   | 0   | 1   | 2   | -0.04   |  | 0   | 0   | 0   | 0    |         |
| 165377181 | Yars          | tyrosyl-tRNA synthetase, cytoplasmic                    | 2   | 2   | 2   | 6   | -0.05   |  | 0   | 0   | 0   | 0    |         |
| 39930579  | Yars2         | tyrosyl-tRNA synthetase, mitochondrial precursor        | 0   | 2   | 3   | 5   | 0.50    |  | 0   | 2   | 1   | 3    | 0.05    |
| 67846113  | Snrnp70       | U1 small nuclear ribonucleoprotein 70 kDa               | 13  | 27  | 12  | 52  | -0.04   |  | 18  | 9   | 13  | 40   | 0.01    |
| 114052106 | Snrpa         | U1 small nuclear ribonucleoprotein A                    | 49  | 51  | 44  | 144 | 0.03    |  | 40  | 25  | 28  | 93   | 0.13    |
| 6755596   | Snrpc         | U1 small nuclear ribonucleoprotein C                    | 13  | 23  | 14  | 50  | -0.03   |  | 10  | 8   | 8   | 26   | -0.02   |
| 262118251 | Snrnp25       | U11/U12 small nuclear ribonucleoprotein 25 kDa protein  | 0   | 1   | 0   | 1   | 0.39    |  | 0   | 0   | 0   | 0    |         |
| 21624627  | Snrnp35       | U11/U12 small nuclear ribonucleoprotein 35 kDa protein  | 1   | 1   | 0   | 2   | -0.12   |  | 0   | 1   | 1   | 2    | 0.07    |
| 228480232 | Snrpa1        | U2 small nuclear ribonucleoprotein A'                   | 35  | 35  | 41  | 111 | 0.05 *  |  | 48  | 39  | 30  | 117  | 0.09    |
| 23956110  | Snrpb2        | U2 small nuclear ribonucleoprotein B''                  | 16  | 19  | 13  | 48  | -0.02   |  | 23  | 13  | 9   | 45   | -0.06   |
| 171460910 | 2610101N10Rik | U2 snRNP-associated SURP motif-containing protein 1     | 0   | 0   | 31  | 31  | 0.10    |  | 0   | 0   | 0   | 0    |         |
| 171460908 | 2610101N10Rik | U2 snRNP-associated SURP motif-containing protein 2     | 19  | 47  | 0   | 66  | 0.13    |  | 14  | 53  | 46  | 113  | 0.33    |
| 19527196  | Imp3          | U3 small nucleolar ribonucleoprotein protein IMP3       | 5   | 8   | 1   | 14  | -0.27   |  | 29  | 10  | 14  | 53   | 0.02    |
| 190684705 | Imp4          | U3 small nucleolar ribonucleoprotein protein IMP4       | 1   | 0   | 1   | 2   | -0.64 # |  | 5   | 9   | 10  | 24   | 0.02    |
| 68303650  | Mphosph10     | U3 small nucleolar ribonucleoprotein protein MPP10      | 0   | 2   | 1   | 3   | -0.13   |  | 14  | 25  | 25  | 64   | 0.06    |
| 51889716  | Utp14a        | U3 small nucleolar RNA-associated protein 14 homolog A  | 0   | 2   | 0   | 2   | -1.37 # |  | 1   | 14  | 20  | 35   | 0.09    |
| 75992943  | Utp14b        | U3 small nucleolar RNA-associated protein 14 homolog B  | 0   | 0   | 0   | 0   |         |  | 0   | 0   | 2   | 2    | 0.24    |
| 30725776  | Utp15         | U3 small nucleolar RNA-associated protein 15 homolog    | 2   | 2   | 5   | 9   | -0.16   |  | 19  | 39  | 37  | 95   | 0.01    |
| 61656180  | Utp18         | U3 small nucleolar RNA-associated protein 18 homolog    | 1   | 5   | 4   | 10  | -0.29   |  | 31  | 33  | 32  | 96   | 0.01    |
| 21450209  | Utp6          | U3 small nucleolar RNA-associated protein 6 homolog     | 3   | 6   | 0   | 9   | -0.40   |  | 9   | 16  | 18  | 43   | 0.03    |
| 21704248  | Rrp9          | U3 small nucleolar RNA-interacting protein 2            | 10  | 3   | 8   | 21  | -0.16   |  | 14  | 35  | 29  | 78   | 0.03    |
| 31980657  | Prpf3         | U4/U6 small nuclear ribonucleoprotein Prp3              | 25  | 39  | 27  | 91  | -0.07   |  | 6   | 11  | 13  | 30   | 0.02    |
| 228480236 | Prpf31        | U4/U6 small nuclear ribonucleoprotein Prp31 isoform 1   | 19  | 0   | 28  | 47  | -0.01   |  | 0   | 0   | 0   | 0    |         |
| 228480238 | Prpf31        | U4/U6 small nuclear ribonucleoprotein Prp31 isoform 2   | 7   | 18  | 4   | 29  | 0.06    |  | 4   | 17  | 11  | 32   | -0.17 * |
| 55925589  | Prpf4         | U4/U6 small nuclear ribonucleoprotein Prp4              | 28  | 28  | 28  | 84  | -0.04   |  | 10  | 17  | 17  | 44   | -0.09   |
| 27228990  | Snrnp27       | U4/U6.U5 small nuclear ribonucleoprotein 27 kDa protein | 8   | 17  | 9   | 34  | 0.00    |  | 0   | 5   | 3   | 8    | 0.02    |
| 124244096 | Sart1         | U4/U6.U5 tri-snRNP-associated protein 1                 | 67  | 71  | 60  | 198 | -0.03   |  | 14  | 48  | 50  | 112  | 0.02    |
| 20070404  | Usp39         | U4/U6.U5 tri-snRNP-associated protein 2                 | 26  | 44  | 31  | 101 | -0.01   |  | 11  | 19  | 15  | 45   | -0.16   |
| 40018610  | Snrnp200      | U5 small nuclear ribonucleoprotein 200 kDa helicase     | 295 | 385 | 307 | 987 | -0.05   |  | 434 | 876 | ### | 2388 | -0.01   |
| 115298670 | Snrnp40       | U5 small nuclear ribonucleoprotein 40 kDa protein       | 38  | 43  | 31  | 112 | 0.01    |  | 41  | 49  | 41  | 131  | 0.03    |
| 110625667 | Lsm1          | U6 snRNA-associated Sm-like protein LSm1                | 1   | 0   | 2   | 3   | 0.08    |  | 0   | 0   | 0   | 0    |         |
| 158533995 | Lsm2          | U6 snRNA-associated Sm-like protein LSm2 isoform 2      | 31  | 33  | 30  | 94  | 0.03    |  | 19  | 2   | 8   | 29   | 0.14    |
| 13385806  | Lsm3          | U6 snRNA-associated Sm-like protein LSm3                | 2   | 2   | 0   | 4   | 0.03    |  | 0   | 0   | 1   | 1    | 0.21    |
| 159032056 | Lsm4          | U6 snRNA-associated Sm-like protein LSm4                | 21  | 25  | 17  | 63  | -0.01   |  | 6   | 7   | 1   | 14   | -0.01   |

|           |         |                                                                 |    |    |    |    |         |    |    |    |     |          |
|-----------|---------|-----------------------------------------------------------------|----|----|----|----|---------|----|----|----|-----|----------|
| 113865835 | Lsm6    | U6 snRNA-associated Sm-like protein LSM6                        | 2  | 3  | 4  | 9  | -0.07   | 2  | 0  | 1  | 3   | -0.14    |
| 13384714  | Lsm7    | U6 snRNA-associated Sm-like protein LSM7                        | 7  | 0  | 0  | 7  | 0.11    | 0  | 0  | 0  | 0   |          |
| 31541947  | Fytd1   | UAP56-interacting factor isoform 1                              | 0  | 0  | 7  | 7  | 0.13    | 0  | 17 | 21 | 38  | 0.14     |
| 226823218 | Fytd1   | UAP56-interacting factor isoform 2                              | 3  | 4  | 0  | 7  | 0.25    | 17 | 0  | 0  | 17  | -0.06    |
| 125490373 | Gm10035 | UbiE3 protein                                                   | 0  | 0  | 0  | 0  |         | 0  | 1  | 0  | 1   | 0.60 #   |
| 71534247  | Ubn1    | ubinnuclein-1                                                   | 0  | 1  | 1  | 2  | -0.05   | 0  | 0  | 0  | 0   |          |
| 34328236  | Ubqln2  | ubiquilin-2                                                     | 0  | 0  | 2  | 2  | 0.50    | 0  | 0  | 0  | 0   |          |
| 15805016  | Ubqln4  | ubiquilin-4                                                     | 0  | 0  | 5  | 5  | 0.53    | 0  | 0  | 0  | 0   |          |
| 213512915 | Uqcc    | ubiquinol-cytochrome c reductase complex chaperone CBP3 homolog | 14 | 18 | 14 | 46 | -0.01   | 1  | 7  | 6  | 14  | -0.14    |
| 33859690  | Coq9    | ubiquinone biosynthesis protein COQ9, mitochondrial precursor   | 2  | 0  | 0  | 2  | -0.37   | 0  | 0  | 0  | 0   |          |
| 34328057  | Usp12   | ubiquitin carboxyl-terminal hydrolase 12                        | 2  | 0  | 0  | 2  | -1.28 # | 0  | 0  | 0  | 0   |          |
| 84452155  | Usp14   | ubiquitin carboxyl-terminal hydrolase 14 isoform 2              | 0  | 0  | 0  | 0  |         | 0  | 0  | 1  | 1   | 0.06     |
| 270265851 | Usp19   | ubiquitin carboxyl-terminal hydrolase 19 isoform 5              | 0  | 1  | 1  | 2  | 0.23    | 0  | 0  | 0  | 0   |          |
| 21450103  | Usp3    | ubiquitin carboxyl-terminal hydrolase 3                         | 19 | 18 | 16 | 53 | -0.03   | 0  | 19 | 13 | 32  | -0.20    |
| 85986575  | Usp30   | ubiquitin carboxyl-terminal hydrolase 30                        | 0  | 0  | 0  | 0  |         | 1  | 0  | 0  | 1   | -10.02 # |
| 29243896  | Usp46   | ubiquitin carboxyl-terminal hydrolase 46                        | 0  | 3  | 2  | 5  | -0.01   | 0  | 0  | 0  | 0   |          |
| 114053325 | Usp48   | ubiquitin carboxyl-terminal hydrolase 48                        | 2  | 2  | 1  | 5  | 0.22    | 0  | 0  | 0  | 0   |          |
| 7305619   | Usp5    | ubiquitin carboxyl-terminal hydrolase 5                         | 0  | 0  | 0  | 0  |         | 0  | 0  | 6  | 6   | 0.02     |
| 154146209 | Usp7    | ubiquitin carboxyl-terminal hydrolase 7                         | 21 | 25 | 27 | 73 | 0.16    | 0  | 11 | 10 | 21  | 0.19     |
| 28076917  | Bap1    | ubiquitin carboxyl-terminal hydrolase BAP1                      | 0  | 1  | 0  | 1  | 1.05 #  | 0  | 0  | 0  | 0   |          |
| 139948802 | Uchl3   | ubiquitin carboxyl-terminal hydrolase isozyme L3                | 0  | 0  | 0  | 0  |         | 0  | 10 | 16 | 26  | -0.24    |
| 229577281 | Uchl5   | ubiquitin carboxyl-terminal hydrolase isozyme L5 isoform 1      | 0  | 7  | 0  | 7  | -0.10   | 0  | 0  | 0  | 0   |          |
| 229577283 | Uchl5   | ubiquitin carboxyl-terminal hydrolase isozyme L5 isoform 2      | 9  | 7  | 8  | 24 | 0.32    | 0  | 3  | 2  | 5   | -0.05    |
| 21703984  | Ubd1    | ubiquitin domain-containing protein 1                           | 0  | 0  | 0  | 0  |         | 0  | 1  | 0  | 1   | -0.05    |
| 257153392 | Ufd11   | ubiquitin fusion degradation protein 1 homolog                  | 2  | 2  | 0  | 4  | 0.00    | 0  | 0  | 0  | 0   |          |
| 226442882 | Usp36   | ubiquitin specific peptidase 36                                 | 0  | 0  | 1  | 1  | 0.68 #  | 0  | 2  | 13 | 15  | 0.29     |
| 19527388  | Otub1   | ubiquitin thioesterase OTUB1                                    | 0  | 0  | 2  | 2  | -0.32   | 12 | 23 | 45 | 80  | -0.06    |
| 13195690  | Rps27a  | ubiquitin-40S ribosomal protein S27a                            | 10 | 24 | 18 | 52 | -0.23   | 87 | 54 | 41 | 182 | -0.11    |
| 90568036  | Ubac2   | ubiquitin-associated domain-containing protein 2 precursor      | 1  | 1  | 0  | 2  | -0.31   | 0  | 0  | 0  | 0   |          |
| 260166715 | Ubab2l  | ubiquitin-associated protein 2-like isoform 6                   | 1  | 1  | 1  | 3  | -0.32   | 0  | 0  | 0  | 0   |          |
| 9790041   | Ube2a   | ubiquitin-conjugating enzyme E2 A                               | 1  | 3  | 2  | 6  | -2.27 # | 0  | 0  | 0  | 0   |          |
| 9910600   | Ube2d2  | ubiquitin-conjugating enzyme E2 D2                              | 10 | 0  | 0  | 10 | -0.11   | 0  | 0  | 0  | 0   |          |
| 13384718  | Ube2d3  | ubiquitin-conjugating enzyme E2 D3                              | 0  | 5  | 8  | 13 | 0.11    | 3  | 0  | 1  | 4   | 0.19     |
| 6678479   | Ube2e1  | ubiquitin-conjugating enzyme E2 E1                              | 0  | 3  | 2  | 5  | -0.13   | 0  | 0  | 0  | 0   |          |
| 21450233  | Ube2e2  | ubiquitin-conjugating enzyme E2 E2                              | 3  | 1  | 3  | 7  | 0.24    | 0  | 0  | 1  | 1   | -0.12    |
| 6678477   | Ube2e3  | ubiquitin-conjugating enzyme E2 E3                              | 2  | 3  | 0  | 5  | 0.11    | 0  | 0  | 0  | 0   |          |
| 27754105  | Ube2g1  | ubiquitin-conjugating enzyme E2 G1                              | 0  | 0  | 0  | 0  |         | 0  | 0  | 2  | 2   | 0.15     |
| 20806111  | Ube2g2  | ubiquitin-conjugating enzyme E2 G2                              | 4  | 2  | 1  | 7  | -0.26   | 0  | 0  | 0  | 0   |          |
| 281332142 | Ube2h   | ubiquitin-conjugating enzyme E2 H isoform 2                     | 0  | 0  | 0  | 0  |         | 0  | 0  | 1  | 1   | -0.52 #  |
| 31542956  | Ube2k   | ubiquitin-conjugating enzyme E2 K                               | 0  | 0  | 1  | 1  | -0.30   | 0  | 4  | 1  | 5   | 0.01     |
| 6678481   | Ube2l3  | ubiquitin-conjugating enzyme E2 L3                              | 0  | 0  | 7  | 7  | -0.16   | 0  | 0  | 0  | 0   |          |
| 309262120 | Gm10145 | ubiquitin-conjugating enzyme E2 L3-like                         | 6  | 3  | 0  | 9  | 0.32    | 0  | 0  | 0  | 0   |          |
| 18017605  | Ube2n   | ubiquitin-conjugating enzyme E2 N                               | 8  | 7  | 7  | 22 | -0.02   | 20 | 2  | 9  | 31  | -0.24    |
| 19527004  | Ube2s   | ubiquitin-conjugating enzyme E2 S                               | 2  | 1  | 0  | 3  | 0.16    | 0  | 0  | 0  | 0   |          |
| 42741690  | Ube2v1  | ubiquitin-conjugating enzyme E2 variant 1                       | 6  | 4  | 7  | 17 | 0.06    | 3  | 8  | 10 | 21  | 0.04     |

|           |               |                                                                                  |    |    |    |    |       |     |    |    |    |       |       |   |
|-----------|---------------|----------------------------------------------------------------------------------|----|----|----|----|-------|-----|----|----|----|-------|-------|---|
| 31543918  | Ube2v2        | ubiquitin-conjugating enzyme E2 variant 2 isoform 1                              | 0  | 4  | 7  | 11 | 0.11  | 0   | 0  | 0  | 0  |       |       |   |
| 13385932  | Ufm1          | ubiquitin-fold modifier 1 precursor                                              | 0  | 2  | 1  | 3  | -0.09 | 0   | 0  | 0  | 0  |       |       |   |
| 6678483   | Uba1          | ubiquitin-like modifier-activating enzyme 1 isoform 1                            | 0  | 0  | 0  | 0  |       | 0   | 6  | 40 | 46 | -0.54 | #     |   |
| 6755925   | Ubl3          | ubiquitin-like protein 3 precursor                                               | 0  | 0  | 1  | 1  | 0.12  | 0   | 0  | 0  | 0  |       |       |   |
| 21703810  | Ubl4          | ubiquitin-like protein 4A                                                        | 2  | 0  | 4  | 6  | 0.03  | 0   | 0  | 0  | 0  |       |       |   |
| 13384784  | Ubl5          | ubiquitin-like protein 5                                                         | 7  | 10 | 14 | 31 | -0.01 | 3   | 1  | 7  | 11 | -0.01 |       |   |
| 149268096 | Gm9843        | ubiquitin-like protein FUBI-like                                                 | 2  | 1  | 1  | 4  | 0.17  | 0   | 0  | 1  | 1  | -0.28 |       |   |
| 149260017 | Gm7866        | ubiquitin-like protein ISG15-like                                                | 0  | 5  | 5  | 10 | 3.76  | #   | 0  | 16 | 24 | 40    | -1.66 | # |
| 309266537 | Gm7866        | ubiquitin-like protein ISG15-like                                                | 10 | 7  | 0  | 17 | -1.20 | #   | 28 | 0  | 0  | 28    | -6.81 | # |
| 85861252  | Ubxn4         | UBX domain-containing protein 4                                                  | 7  | 7  | 9  | 23 | -0.01 | 1   | 5  | 4  | 10 | 0.09  |       |   |
| 236466498 | Uggt1         | UDP-glucose:glycoprotein glucosyltransferase 1 precursor                         | 37 | 2  | 7  | 46 | -0.20 | 0   | 1  | 9  | 10 | -0.01 |       |   |
| 13195608  | Alg14         | UDP-N-acetylglucosamine transferase subunit ALG14 homolog                        | 1  | 0  | 1  | 2  | -0.24 | 0   | 0  | 0  | 0  |       |       |   |
| 46909607  | Ogt           | UDP-N-acetylglucosamine--peptide N-acetylglucosaminyltransferase 110 kDa subunit | 3  | 8  | 12 | 23 | 0.30  | 0   | 0  | 0  | 0  |       |       |   |
| 20149754  | Ufsp2         | ufm1-specific protease 2                                                         | 1  | 3  | 4  | 8  | -0.27 | 0   | 0  | 0  | 0  |       |       |   |
| 165377065 | Cmpk1         | UMP-CMP kinase                                                                   | 0  | 1  | 1  | 2  | 0.25  | 0   | 4  | 4  | 8  | -0.16 |       |   |
| 149272574 | LOC100039181  | uncharacterized protein C4orf3 homolog                                           | 9  | 2  | 2  | 13 | -0.35 | *   | 1  | 0  | 0  | 1     | -0.22 |   |
| 309264842 | Gm4540        | uncharacterized protein C8orf59 homolog                                          | 0  | 1  | 0  | 1  | -0.06 |     | 0  | 0  | 0  | 0     |       |   |
| 82918901  | 2210011C24Rik | uncharacterized protein LOC113230 isoform 3                                      | 14 | 18 | 11 | 43 | 0.06  |     | 0  | 7  | 4  | 11    | -0.23 |   |
| 71274162  | Urb2          | unhealthy ribosome biogenesis protein 2 homolog                                  | 6  | 11 | 14 | 31 | 0.02  |     | 0  | 10 | 2  | 12    | -0.06 |   |
| 149251573 | Gm10704       | UPF0568 protein C14orf166 homolog                                                | 0  | 0  | 0  | 0  |       |     | 2  | 0  | 0  | 2     | -0.18 |   |
| 309265053 | LOC100504912  | up-regulated during skeletal muscle growth protein 5-like                        | 3  | 0  | 1  | 4  | -0.34 | *   | 3  | 0  | 1  | 4     | 0.06  |   |
| 6678521   | Usf1          | upstream stimulatory factor 1                                                    | 9  | 5  | 4  | 18 | -0.15 |     | 0  | 0  | 0  | 0     |       |   |
| 309265861 | LOC100504922  | upstream stimulatory factor 2-like                                               | 0  | 6  | 3  | 9  | 0.23  |     | 0  | 0  | 0  | 0     |       |   |
| 7305605   | Ubp1          | upstream-binding protein 1 isoform b                                             | 9  | 13 | 6  | 28 | 0.01  |     | 0  | 2  | 0  | 2     | 0.00  |   |
| 101943421 | Ung           | uracil-DNA glycosylase isoform b                                                 | 1  | 1  | 1  | 3  | 0.33  |     | 0  | 2  | 1  | 3     | -0.15 |   |
| 33859498  | Umps          | uridine 5'-monophosphate synthase                                                | 0  | 0  | 0  | 0  |       |     | 0  | 4  | 7  | 11    | -0.11 |   |
| 58037127  | Upk1a         | uroplakin-1a                                                                     | 11 | 0  | 0  | 11 | -0.27 |     | 0  | 2  | 0  | 2     | -0.35 |   |
| 110431378 | Utrn          | utrophin                                                                         | 0  | 1  | 0  | 1  | 0.06  |     | 0  | 0  | 0  | 0     |       |   |
| 171906578 | Rad23b        | UV excision repair protein RAD23 homolog B                                       | 2  | 2  | 0  | 4  | 0.02  |     | 0  | 0  | 0  | 0     |       |   |
| 28077007  | Uaca          | uveal autoantigen with coiled-coil domains and ankyrin repeats                   | 8  | 16 | 4  | 28 | 0.73  | *,# | 0  | 0  | 0  | 0     |       |   |
| 254675217 | Vps18         | vacuolar protein sorting-associated protein 18 homolog                           | 0  | 0  | 0  | 0  |       |     | 0  | 0  | 1  | 1     | -0.19 |   |
| 19526826  | Vps26a        | vacuolar protein sorting-associated protein 26A isoform a                        | 0  | 0  | 0  | 0  |       |     | 0  | 1  | 1  | 2     | -0.35 |   |
| 13385320  | Vps28         | vacuolar protein sorting-associated protein 28 homolog                           | 0  | 2  | 1  | 3  | -0.06 |     | 0  | 3  | 0  | 3     | -0.41 |   |
| 9790285   | Vps29         | vacuolar protein sorting-associated protein 29                                   | 1  | 0  | 2  | 3  | -0.26 |     | 0  | 2  | 5  | 7     | -0.40 |   |
| 13928670  | Vps35         | vacuolar protein sorting-associated protein 35                                   | 1  | 1  | 0  | 2  | -0.05 |     | 0  | 3  | 21 | 24    | -0.18 |   |
| 7305631   | Vps45         | vacuolar protein sorting-associated protein 45                                   | 2  | 1  | 1  | 4  | 0.06  |     | 0  | 0  | 0  | 0     |       |   |
| 18699726  | Vps4a         | vacuolar protein sorting-associated protein 4A                                   | 0  | 0  | 0  | 0  |       |     | 0  | 1  | 0  | 1     | 0.18  |   |
| 164698506 | Vps4b         | vacuolar protein sorting-associated protein 4B                                   | 0  | 0  | 0  | 0  |       |     | 0  | 0  | 1  | 1     | -0.24 |   |
| 31980873  | Vps53         | vacuolar protein sorting-associated protein 53 homolog                           | 0  | 0  | 0  | 0  |       |     | 0  | 0  | 1  | 1     | -0.05 |   |

|           |               |                                                                          |    |    |    |     |         |     |    |    |     |          |
|-----------|---------------|--------------------------------------------------------------------------|----|----|----|-----|---------|-----|----|----|-----|----------|
| 83921607  | Vps72         | vacuolar protein sorting-associated protein 72 homolog                   | 4  | 2  | 2  | 8   | 0.01    | 0   | 3  | 2  | 5   | 0.13     |
| 25092662  | Vps25         | vacuolar protein-sorting-associated protein 25                           | 4  | 11 | 6  | 21  | 0.02    | 0   | 4  | 3  | 7   | -0.13    |
| 15809002  | Snf8          | vacuolar-sorting protein SNF8                                            | 0  | 2  | 3  | 5   | -0.38   | 0   | 1  | 0  | 1   | 0.07     |
| 21624609  | Bph1          | valacyclovir hydrolase precursor                                         | 11 | 1  | 3  | 15  | -0.26 * | 0   | 1  | 2  | 3   | -0.15    |
| 255069795 | Vars          | valyl-tRNA synthetase                                                    | 20 | 41 | 48 | 109 | -0.05   | 0   | 23 | 55 | 78  | -0.17    |
| 30578384  | Vps39         | vam6/Vps39-like protein isoform 2                                        | 0  | 1  | 1  | 2   | 1.67 #  | 0   | 0  | 0  | 0   |          |
| 117414176 | Vezf1         | vascular endothelial zinc finger 1                                       | 1  | 4  | 0  | 5   | -0.13   | 1   | 4  | 0  | 5   | 0.04     |
| 160707909 | Vasp          | vasodilator-stimulated phosphoprotein                                    | 3  | 2  | 7  | 12  | -0.12   | 0   | 0  | 0  | 0   |          |
| 23956084  | Acadv1        | very long-chain specific acyl-CoA dehydrogenase, mitochondrial precursor | 17 | 8  | 4  | 29  | -0.23   | 0   | 4  | 1  | 5   | 0.40     |
| 13385354  | Golt1b        | vesicle transport protein GOT1B                                          | 5  | 0  | 2  | 7   | -0.31 * | 3   | 0  | 0  | 3   | -0.18    |
| 255003752 | Bnip1         | vesicle transport protein SEC20                                          | 1  | 0  | 0  | 1   | 0.25    | 0   | 0  | 0  | 0   |          |
| 6678553   | Vamp3         | vesicle-associated membrane protein 3                                    | 1  | 1  | 2  | 4   | 0.03    | 0   | 0  | 0  | 0   |          |
| 94721328  | Vapa          | vesicle-associated membrane protein-associated protein A                 | 18 | 31 | 26 | 75  | -0.14   | 36  | 13 | 25 | 74  | -0.17    |
| 31543940  | Vapb          | vesicle-associated membrane protein-associated protein B                 | 11 | 11 | 17 | 39  | 0.01    | 11  | 7  | 10 | 28  | 0.04     |
| 31543349  | Nsf           | vesicle-fusing ATPase                                                    | 2  | 0  | 0  | 2   | -0.36   | 0   | 0  | 0  | 0   |          |
| 6755448   | Sec22b        | vesicle-trafficking protein SEC22b                                       | 33 | 34 | 30 | 97  | -0.25   | 45  | 23 | 23 | 91  | -0.18    |
| 34328278  | Lman2         | vesicular integral-membrane protein VIP36 precursor                      | 3  | 1  | 2  | 6   | -0.42   | 2   | 2  | 3  | 7   | -0.39    |
| 19527028  | Hdlbp         | vigilin                                                                  | 24 | 26 | 34 | 84  | 0.08    | 0   | 0  | 1  | 1   | -0.20    |
| 257096033 | Vill          | villin-like protein isoform 2                                            | 0  | 4  | 3  | 7   | 0.17    | 0   | 1  | 4  | 5   | 0.61 #   |
| 31543942  | Vcl           | vinculin                                                                 | 23 | 24 | 12 | 59  | 0.26    | 0   | 4  | 21 | 25  | 0.40     |
| 6755504   | Sorbs3        | vinexin                                                                  | 0  | 3  | 0  | 3   | 0.21    | 0   | 0  | 0  | 0   |          |
| 61656186  | Lman2l        | VIP36-like protein precursor                                             | 0  | 0  | 1  | 1   | -0.81 # | 0   | 0  | 0  | 0   |          |
| 46309457  | Vkorc111      | vitamin K epoxide reductase complex subunit 1-like protein 1 isoform 1   | 2  | 0  | 0  | 2   | -0.31   | 0   | 0  | 0  | 0   |          |
| 6755963   | Vdac1         | voltage-dependent anion-selective channel protein 1                      | 21 | 16 | 22 | 59  | 0.23 *  | 125 | 50 | 79 | 254 | 0.33     |
| 6755965   | Vdac2         | voltage-dependent anion-selective channel protein 2                      | 18 | 11 | 12 | 41  | 0.36 *  | 117 | 40 | 62 | 219 | 0.37 *   |
| 6755967   | Vdac3         | voltage-dependent anion-selective channel protein 3 isoform 2            | 11 | 6  | 12 | 29  | 0.23 *  | 102 | 27 | 39 | 168 | 0.35 *   |
| 114145503 | Vmn2r1        | vomeroneasal type-2 receptor 1 precursor                                 | 0  | 1  | 0  | 1   | -0.15   | 0   | 0  | 0  | 0   |          |
| 225543183 | Vwa5a         | von Willebrand factor A domain-containing protein 5A                     | 6  | 7  | 7  | 20  | 0.25    | 0   | 0  | 1  | 1   | -0.26    |
| 12025532  | Atp6v0a1      | V-type proton ATPase 116 kDa subunit a isoform 1                         | 0  | 0  | 0  | 0   |         | 2   | 0  | 7  | 9   | 0.40     |
| 6753144   | Atp6v0c       | V-type proton ATPase 16 kDa proteolipid subunit                          | 1  | 0  | 2  | 3   | 0.44    | 11  | 2  | 7  | 20  | 0.35     |
| 31560731  | Atp6v1a       | V-type proton ATPase catalytic subunit A                                 | 1  | 0  | 0  | 1   | 0.09    | 0   | 1  | 1  | 2   | 1.03 #   |
| 19705578  | Atp6v1b2      | V-type proton ATPase subunit B, brain isoform                            | 1  | 1  | 0  | 2   | -0.02   | 0   | 3  | 0  | 3   | 0.02     |
| 189339262 | Atp6v1c1      | V-type proton ATPase subunit C 1                                         | 0  | 0  | 0  | 0   |         | 1   | 2  | 3  | 6   | 0.08     |
| 12963799  | Atp6v1d       | V-type proton ATPase subunit D                                           | 0  | 0  | 0  | 0   |         | 0   | 0  | 1  | 1   | 0.69 #   |
| 31981304  | Atp6v0d1      | V-type proton ATPase subunit d 1                                         | 0  | 0  | 0  | 0   |         | 6   | 11 | 10 | 27  | 0.56 *,# |
| 45504359  | Atp6v1e1      | V-type proton ATPase subunit E 1                                         | 2  | 2  | 0  | 4   | 0.06    | 0   | 0  | 3  | 3   | 0.34     |
| 21314824  | Atp6v1f       | V-type proton ATPase subunit F                                           | 1  | 0  | 0  | 1   | 0.28    | 0   | 0  | 0  | 0   |          |
| 15617197  | Atp6v1g1      | V-type proton ATPase subunit G 1                                         | 3  | 2  | 4  | 9   | 0.08    | 1   | 0  | 0  | 1   | 0.36     |
| 126090572 | A230046K03Rik | WASH complex subunit 7                                                   | 1  | 1  | 3  | 5   | -0.51   | 0   | 0  | 1  | 1   | -0.22    |
| 46048300  | E430025E21Rik | WASH complex subunit strumpellin                                         | 0  | 3  | 1  | 4   | -0.28   | 0   | 0  | 1  | 1   | 0.29     |
| 40254224  | Wdhd1         | WD repeat and HMG-box DNA-binding protein 1                              | 0  | 6  | 1  | 7   | 0.48    | 0   | 0  | 0  | 0   |          |
| 21362285  | Wdr33         | WD repeat domain 33 isoform 1                                            | 13 | 34 | 13 | 60  | 0.24 *  | 0   | 2  | 0  | 2   | 0.38     |
| 158517942 | Wdr36         | WD repeat domain 36 isoform 2                                            | 3  | 9  | 3  | 15  | -0.16   | 18  | 71 | 71 | 160 | -0.01    |
| 31542010  | Wdr36         | WD repeat domain 36 isoform 3                                            | 0  | 0  | 0  | 0   |         | 0   | 0  | 2  | 2   | 0.01     |

|           |         |                                                                |    |    |    |     |           |    |    |     |     |         |  |
|-----------|---------|----------------------------------------------------------------|----|----|----|-----|-----------|----|----|-----|-----|---------|--|
| 27229002  | Wdr45l  | WD repeat domain phosphoinositide-interacting protein 3        | 0  | 1  | 0  | 1   | 0.26      | 0  | 0  | 0   | 0   |         |  |
| 6755995   | Wdr1    | WD repeat-containing protein 1                                 | 5  | 6  | 0  | 11  | 0.41      | 0  | 1  | 3   | 4   | -0.30   |  |
| 227908800 | Wdr11   | WD repeat-containing protein 11                                | 0  | 0  | 1  | 1   | 0.13      | 0  | 0  | 0   | 0   |         |  |
| 83649741  | Wdr18   | WD repeat-containing protein 18                                | 9  | 19 | 16 | 44  | 0.25      | 1  | 4  | 7   | 12  | 0.31    |  |
| 21735451  | Wdr20b  | WD repeat-containing protein 20                                | 0  | 0  | 1  | 1   | -0.83 #   | 0  | 0  | 0   | 0   |         |  |
| 264681550 | Wdr26   | WD repeat-containing protein 26                                | 0  | 0  | 0  | 0   |           | 0  | 1  | 0   | 1   | -2.02 # |  |
| 30425338  | Wdr3    | WD repeat-containing protein 3                                 | 0  | 4  | 8  | 12  | -0.26     | 21 | 81 | 143 | 245 | 0.01    |  |
| 226958503 | Wdr35   | WD repeat-containing protein 35 isoform 2                      | 0  | 0  | 1  | 1   | -0.31     | 0  | 0  | 0   | 0   |         |  |
| 241896997 | Wdr43   | WD repeat-containing protein 43                                | 3  | 10 | 4  | 17  | -0.21     | 68 | 57 | 92  | 217 | 0.04    |  |
| 10181122  | Wdr46   | WD repeat-containing protein 46                                | 0  | 0  | 0  | 0   |           | 21 | 23 | 35  | 79  | 0.04    |  |
| 33468967  | Wdr48   | WD repeat-containing protein 48                                | 1  | 2  | 0  | 3   | -0.04     | 0  | 0  | 0   | 0   |         |  |
| 18252790  | Wdr5    | WD repeat-containing protein 5                                 | 18 | 24 | 22 | 64  | 0.18      | 6  | 11 | 18  | 35  | 0.08    |  |
| 13878227  | Wdr6    | WD repeat-containing protein 6                                 | 0  | 1  | 0  | 1   | -0.26     | 0  | 0  | 0   | 0   |         |  |
| 70778817  | Wdr61   | WD repeat-containing protein 61 isoform a                      | 16 | 18 | 13 | 47  | 0.42      | 7  | 15 | 19  | 41  | -0.11   |  |
| 124487149 | Wdr70   | WD repeat-containing protein 70                                | 0  | 1  | 0  | 1   | 0.29      | 0  | 0  | 0   | 0   |         |  |
| 19527374  | Wdr74   | WD repeat-containing protein 74                                | 1  | 0  | 0  | 1   | 0.12      | 0  | 3  | 5   | 8   | 0.08    |  |
| 83523742  | Wdr75   | WD repeat-containing protein 75                                | 1  | 1  | 0  | 2   | 0.21      | 8  | 61 | 64  | 133 | -0.09   |  |
| 124487321 | Wdr76   | WD repeat-containing protein 76                                | 1  | 0  | 0  | 1   | -1.10 #   | 0  | 0  | 0   | 0   |         |  |
| 148223079 | Wdr82   | WD repeat-containing protein 82                                | 28 | 26 | 17 | 71  | 0.20      | 10 | 14 | 19  | 43  | 0.15 *  |  |
| 149256553 | Wdr88   | WD repeat-containing protein 88                                | 0  | 0  | 0  | 0   |           | 0  | 1  | 0   | 1   | -0.15   |  |
| 226442867 | Wdr89   | WD repeat-containing protein 89                                | 0  | 3  | 2  | 5   | 0.02      | 0  | 0  | 0   | 0   |         |  |
| 255003812 | Wdr90   | WD repeat-containing protein 90                                | 0  | 1  | 0  | 1   | -0.79 #   | 0  | 0  | 0   | 0   |         |  |
| 227430367 | Smu1    | WD40 repeat-containing protein SMU1                            | 40 | 39 | 39 | 118 | -0.07     | 32 | 80 | 46  | 158 | -0.02   |  |
| 15809010  | Wbscr16 | Williams-Beuren syndrome chromosomal region 16 protein homolog | 1  | 3  | 4  | 8   | 0.03      | 0  | 0  | 0   | 0   |         |  |
| 125988405 | Wbscr22 | Williams-Beuren syndrome critical region protein 22            | 1  | 2  | 6  | 9   | -0.07     | 0  | 0  | 0   | 0   |         |  |
| 100815493 | Wapal   | wings apart-like protein homolog                               | 24 | 52 | 10 | 86  | 0.35      | 0  | 1  | 0   | 1   | 0.01    |  |
| 23510313  | Wasf2   | wiskott-Aldrich syndrome protein family member 2               | 1  | 3  | 1  | 5   | 0.28      | 0  | 0  | 0   | 0   |         |  |
| 6755997   | Wfs1    | wolframín                                                      | 1  | 1  | 1  | 3   | -0.45     | 0  | 0  | 0   | 0   |         |  |
| 267844920 | Wbp11   | WW domain-binding protein 11                                   | 14 | 28 | 16 | 58  | 0.08      | 4  | 18 | 17  | 39  | 0.09    |  |
| 84871981  | Wbp4    | WW domain-binding protein 4                                    | 0  | 0  | 2  | 2   | 0.26      | 0  | 2  | 0   | 2   | 0.05    |  |
| 145046246 | Xirp2   | xin actin-binding repeat-containing protein 2 isoform 2        | 1  | 1  | 1  | 3   | -2.17 #   | 0  | 0  | 0   | 0   |         |  |
| 160333605 | Xrcc5   | X-ray repair cross-complementing protein 5                     | 0  | 11 | 2  | 13  | -0.28     | 0  | 0  | 0   | 0   |         |  |
| 145587104 | Xrcc6   | X-ray repair cross-complementing protein 6                     | 2  | 7  | 4  | 13  | -0.66 *,# | 0  | 6  | 1   | 7   | -0.24   |  |
| 225543568 | Yeats2  | YEATS domain-containing protein 2 isoform 2                    | 6  | 17 | 5  | 28  | 0.64 *,#  | 0  | 0  | 0   | 0   |         |  |
| 13386064  | Yeats4  | YEATS domain-containing protein 4                              | 12 | 16 | 12 | 40  | 0.30      | 0  | 5  | 2   | 7   | 0.06    |  |
| 146134507 | Ylpm1   | YLP motif-containing protein 1                                 | 16 | 13 | 10 | 39  | 0.49 *    | 0  | 1  | 0   | 1   | 0.41    |  |
| 124430549 | Ythdc1  | YTH domain containing 1                                        | 0  | 0  | 0  | 0   |           | 0  | 6  | 1   | 7   | 0.37    |  |
| 30424609  | Ythdf1  | YTH domain family protein 1                                    | 0  | 2  | 0  | 2   | -0.21     | 0  | 0  | 0   | 0   |         |  |
| 225543497 | Ythdf3  | YTH domain family protein 3 isoform 2                          | 1  | 1  | 3  | 5   | -0.71 #   | 0  | 0  | 0   | 0   |         |  |
| 40254385  | Yaf2    | YY1-associated factor 2                                        | 1  | 7  | 0  | 8   | 0.04      | 0  | 2  | 0   | 2   | 0.14    |  |
| 258645088 | Zbtb11  | zinc finger and BTB domain containing 11                       | 0  | 0  | 0  | 0   |           | 0  | 0  | 1   | 1   | 0.57 #  |  |
| 117938320 | Zbtb38  | zinc finger and BTB domain containing 38                       | 0  | 0  | 0  | 0   |           | 0  | 0  | 1   | 1   | 6.58 #  |  |
| 171919772 | Zbtb17  | zinc finger and BTB domain-containing protein 17               | 0  | 0  | 1  | 1   | 0.05      | 0  | 0  | 0   | 0   |         |  |
| 257196203 | Zbtb20  | zinc finger and BTB domain-containing protein 20 isoform S     | 10 | 24 | 1  | 35  | -0.26     | 4  | 12 | 8   | 24  | 0.43 *  |  |
| 38016187  | Zbtb40  | zinc finger and BTB domain-containing protein 40               | 2  | 4  | 2  | 8   | 0.09      | 0  | 0  | 0   | 0   |         |  |
| 117647238 | Zbtb7a  | zinc finger and BTB domain-containing protein 7A               | 14 | 17 | 12 | 43  | 0.17      | 0  | 2  | 0   | 2   | 0.23    |  |



|           |         |                                                                  |    |    |    |    |          |    |    |    |     |        |
|-----------|---------|------------------------------------------------------------------|----|----|----|----|----------|----|----|----|-----|--------|
| 113374186 | Zscan21 | zinc finger and SCAN domain-containing protein 21                | 3  | 6  | 2  | 11 | 0.43 *   | 0  | 0  | 0  | 0   |        |
| 113930733 | Zfa     | zinc finger autosomal protein                                    | 1  | 2  | 0  | 3  | 0.24     | 0  | 0  | 0  | 0   |        |
| 115270986 | Zc3h11a | zinc finger CCCH domain-containing protein 11A                   | 4  | 6  | 7  | 17 | 0.61 *,# | 3  | 6  | 4  | 13  | 0.31   |
| 231570775 | Zc3h14  | zinc finger CCCH domain-containing protein 14 isoform c          | 0  | 1  | 0  | 1  | -0.07    | 0  | 1  | 0  | 1   | 0.00   |
| 34368584  | Zc3h15  | zinc finger CCCH domain-containing protein 15                    | 1  | 0  | 0  | 1  | 0.13     | 0  | 0  | 0  | 0   |        |
| 71725355  | Zc3h18  | zinc finger CCCH domain-containing protein 18 isoform b          | 0  | 2  | 4  | 6  | 0.09     | 1  | 21 | 17 | 39  | 0.06 * |
| 161169020 | Zc3h4   | zinc finger CCCH domain-containing protein 4                     | 2  | 7  | 7  | 16 | 0.43 *   | 0  | 0  | 0  | 0   |        |
| 27754058  | Zcchc10 | zinc finger CCHC domain-containing protein 10                    | 0  | 0  | 0  | 0  |          | 0  | 2  | 4  | 6   | -0.08  |
| 169646700 | Zcchc7  | zinc finger CCHC domain-containing protein 7                     | 0  | 0  | 0  | 0  |          | 0  | 0  | 1  | 1   | 0.14   |
| 169808385 | Zcchc8  | zinc finger CCHC domain-containing protein 8                     | 0  | 5  | 5  | 10 | 0.82 #   | 0  | 0  | 0  | 0   |        |
| 117647247 | Zcchc9  | zinc finger CCHC domain-containing protein 9                     | 0  | 2  | 0  | 2  | -0.08    | 0  | 1  | 0  | 1   | -0.10  |
| 21313088  | Zcrb1   | zinc finger CCHC-type and RNA-binding motif-containing protein 1 | 3  | 4  | 3  | 10 | 0.00     | 0  | 2  | 0  | 2   | -0.01  |
| 256985192 | Zfyve27 | zinc finger FYVE domain-containing protein 27 isoform 2          | 0  | 0  | 1  | 1  | 0.00     | 0  | 0  | 0  | 0   |        |
| 58037197  | Znhit1  | zinc finger HIT domain-containing protein 1                      | 1  | 4  | 1  | 6  | 0.18     | 0  | 0  | 1  | 1   | 0.11   |
| 110225364 | Zfhx3   | zinc finger homeobox protein 3                                   | 0  | 8  | 0  | 8  | 0.48     | 0  | 0  | 0  | 0   |        |
| 13385046  | Zmat2   | zinc finger matrin-type protein 2                                | 8  | 13 | 7  | 28 | -0.03    | 3  | 7  | 3  | 13  | 0.01   |
| 13385520  | Zmat5   | zinc finger matrin-type protein 5                                | 0  | 1  | 0  | 1  | -0.23    | 0  | 1  | 0  | 1   | 4.55 # |
| 37595742  | Zmym2   | zinc finger MYM-type protein 2                                   | 26 | 44 | 22 | 92 | 0.52 *   | 0  | 0  | 0  | 0   |        |
| 295789153 | Zmym3   | zinc finger MYM-type protein 3 isoform 5                         | 0  | 1  | 0  | 1  | -0.54    | 0  | 0  | 0  | 0   |        |
| 167555112 | Zmym4   | zinc finger MYM-type protein 4                                   | 0  | 3  | 0  | 3  | 0.44     | 0  | 0  | 0  | 0   |        |
| 109948269 | Zfp106  | zinc finger protein 106                                          | 2  | 6  | 7  | 15 | 0.36     | 0  | 1  | 20 | 21  | 0.56 # |
| 121247390 | Zfp143  | zinc finger protein 143                                          | 0  | 7  | 0  | 7  | -0.26    | 0  | 0  | 0  | 0   |        |
| 6756049   | Zfp148  | zinc finger protein 148                                          | 6  | 9  | 5  | 20 | 0.13     | 0  | 7  | 9  | 16  | -0.09  |
| 6678637   | Zfp161  | zinc finger protein 161                                          | 0  | 2  | 0  | 2  | 0.13     | 0  | 0  | 0  | 0   |        |
| 157823865 | Zfp185  | zinc finger protein 185 isoform b                                | 1  | 7  | 2  | 10 | -0.37 *  | 0  | 0  | 0  | 0   |        |
| 6756051   | Zfp207  | zinc finger protein 207 isoform 4                                | 12 | 17 | 15 | 44 | 0.02     | 1  | 5  | 2  | 8   | 0.16   |
| 225543502 | Zfp219  | zinc finger protein 219                                          | 0  | 0  | 0  | 0  |          | 0  | 4  | 1  | 5   | 0.57 # |
| 28076891  | Zfp422  | zinc finger protein 22                                           | 0  | 0  | 0  | 0  |          | 1  | 1  | 3  | 5   | 0.06   |
| 47059078  | Zfp191  | zinc finger protein 24                                           | 0  | 4  | 2  | 6  | 0.08     | 0  | 0  | 0  | 0   |        |
| 31544063  | Zfp260  | zinc finger protein 260                                          | 0  | 2  | 0  | 2  | 0.01     | 0  | 0  | 0  | 0   |        |
| 165377130 | Zfp276  | zinc finger protein 276                                          | 0  | 0  | 0  | 0  |          | 0  | 0  | 2  | 2   | 0.13   |
| 262263378 | Zfp280c | zinc finger protein 280C isoform 3                               | 0  | 0  | 0  | 0  |          | 2  | 1  | 0  | 3   | -0.29  |
| 169234810 | Zfp292  | zinc finger protein 292                                          | 0  | 0  | 0  | 0  |          | 0  | 0  | 4  | 4   | -0.13  |
| 255708390 | Zfp316  | zinc finger protein 316                                          | 0  | 1  | 0  | 1  | -0.66 #  | 0  | 0  | 0  | 0   |        |
| 29244118  | Zfp637  | zinc finger protein 32                                           | 0  | 0  | 0  | 0  |          | 0  | 0  | 1  | 1   | -0.28  |
| 269784644 | Zfp326  | zinc finger protein 326                                          | 16 | 27 | 28 | 71 | -0.06    | 69 | 45 | 65 | 179 | -0.06  |
| 6754396   | Zfp346  | zinc finger protein 346                                          | 3  | 7  | 1  | 11 | -0.05    | 0  | 0  | 0  | 0   |        |
| 51592078  | Zfp354c | zinc finger protein 354C                                         | 0  | 1  | 0  | 1  | 0.24     | 0  | 0  | 0  | 0   |        |
| 126352391 | Zfp384  | zinc finger protein 384                                          | 0  | 0  | 0  | 0  |          | 0  | 5  | 1  | 6   | 0.02   |
| 113462002 | Zfp41   | zinc finger protein 41                                           | 0  | 0  | 0  | 0  |          | 0  | 1  | 0  | 1   | -0.24  |
| 254553392 | Zfp512  | zinc finger protein 512                                          | 23 | 23 | 4  | 50 | -0.02    | 48 | 65 | 83 | 196 | -0.06  |
| 295444870 | Zfp513  | zinc finger protein 513 isoform 2                                | 1  | 0  | 0  | 1  | 0.06     | 1  | 0  | 3  | 4   | 0.04   |
| 270483835 | Zfp592  | zinc finger protein 592                                          | 1  | 1  | 0  | 2  | 0.50     | 0  | 0  | 0  | 0   |        |
| 154759288 | Zfp593  | zinc finger protein 593                                          | 2  | 1  | 2  | 5  | -0.07    | 0  | 0  | 0  | 0   |        |
| 242397406 | Zfp618  | zinc finger protein 618                                          | 0  | 1  | 0  | 1  | 0.02     | 0  | 0  | 0  | 0   |        |
| 67763828  | Zfp62   | zinc finger protein 62 isoform 2                                 | 0  | 0  | 0  | 0  |          | 0  | 0  | 3  | 3   | 0.22   |

|           |           |                                                                |    |    |    |     |        |    |    |    |     |        |  |
|-----------|-----------|----------------------------------------------------------------|----|----|----|-----|--------|----|----|----|-----|--------|--|
| 21362307  | Zfp622    | zinc finger protein 622                                        | 0  | 1  | 0  | 1   | -0.29  | 0  | 0  | 0  | 0   |        |  |
| 261823966 | Zfml      | zinc finger protein 638 isoform 1                              | 0  | 19 | 8  | 27  | 0.59 # | 0  | 0  | 0  | 0   |        |  |
| 261823968 | Zfml      | zinc finger protein 638 isoform 2                              | 8  | 0  | 0  | 8   | 0.24   | 0  | 0  | 0  | 0   |        |  |
| 124378028 | Zfp652    | zinc finger protein 652                                        | 0  | 0  | 0  | 0   |        | 0  | 0  | 1  | 1   | -0.09  |  |
| 309267193 | LOC637365 | zinc finger protein 665-like                                   | 0  | 1  | 0  | 1   | 9.84 # | 0  | 0  | 0  | 0   |        |  |
| 27229259  | Zfp687    | zinc finger protein 687                                        | 13 | 20 | 29 | 62  | 0.32 * | 4  | 10 | 6  | 20  | 0.11   |  |
| 225543083 | Zfp691    | zinc finger protein 691                                        | 0  | 1  | 0  | 1   | 0.16   | 0  | 0  | 0  | 0   |        |  |
| 21312658  | Zfp706    | zinc finger protein 706                                        | 2  | 0  | 1  | 3   | 3.19 # | 0  | 0  | 0  | 0   |        |  |
| 23397413  | Zfp740    | zinc finger protein 740                                        | 4  | 3  | 0  | 7   | 0.03   | 1  | 11 | 2  | 14  | 0.00   |  |
| 27369882  | Zfp523    | zinc finger protein 76                                         | 0  | 2  | 0  | 2   | -0.06  | 0  | 0  | 0  | 0   |        |  |
| 29244498  | Zfp786    | zinc finger protein 786                                        | 0  | 1  | 0  | 1   | 0.18   | 0  | 0  | 0  | 0   |        |  |
| 67846115  | Zfp787    | zinc finger protein 787                                        | 2  | 0  | 0  | 2   | 0.06   | 0  | 2  | 0  | 2   | 0.20   |  |
| 126157488 | Zfp800    | zinc finger protein 800                                        | 0  | 0  | 0  | 0   |        | 1  | 7  | 16 | 24  | 0.09   |  |
| 32469497  | Zfp828    | zinc finger protein 828                                        | 4  | 2  | 2  | 8   | 0.13   | 1  | 2  | 1  | 4   | 0.13   |  |
| 31560213  | Zfp830    | zinc finger protein 830                                        | 7  | 9  | 11 | 27  | 0.17   | 1  | 1  | 4  | 6   | 0.33   |  |
| 75677466  | Zfp865    | zinc finger protein 865                                        | 0  | 1  | 0  | 1   | -0.29  | 0  | 5  | 2  | 7   | 0.17   |  |
| 125347389 | Trim27    | zinc finger protein RFP                                        | 0  | 0  | 0  | 0   |        | 0  | 6  | 2  | 8   | 0.04   |  |
| 124486604 | Rlf       | zinc finger protein Rlf                                        | 0  | 0  | 2  | 2   | -0.40  | 0  | 1  | 0  | 1   | 0.07   |  |
| 6755314   | Dpf2      | zinc finger protein ubi-d4                                     | 34 | 40 | 39 | 113 | 0.37   | 10 | 28 | 19 | 57  | 0.43   |  |
| 68510029  | Zkscan1   | zinc finger protein with KRAB and SCAN domains 1 isoform 2     | 1  | 0  | 0  | 1   | 0.66 # | 0  | 1  | 1  | 2   | 1.10 # |  |
| 224809350 | Zkscan3   | zinc finger protein with KRAB and SCAN domains 3               | 0  | 3  | 1  | 4   | 0.30   | 0  | 0  | 0  | 0   |        |  |
| 13195658  | Zfp1      | zinc finger protein-like 1                                     | 0  | 2  | 5  | 7   | -0.30  | 0  | 0  | 1  | 1   | -0.24  |  |
| 74315981  | Zranb2    | zinc finger Ran-binding domain-containing protein 2            | 3  | 1  | 2  | 6   | 0.07   | 0  | 0  | 0  | 0   |        |  |
| 168480106 | Zfr       | zinc finger RNA-binding protein                                | 66 | 97 | 95 | 258 | 0.11   | 27 | 62 | 31 | 120 | 0.01   |  |
| 34328156  | Zhx1      | zinc fingers and homeoboxes protein 1                          | 1  | 5  | 5  | 11  | 0.27 * | 0  | 0  | 0  | 0   |        |  |
| 40789094  | Zhx2      | zinc fingers and homeoboxes protein 2                          | 0  | 1  | 0  | 1   | 0.41   | 0  | 0  | 0  | 0   |        |  |
| 40254321  | Zhx3      | zinc fingers and homeoboxes protein 3                          | 4  | 3  | 1  | 8   | 0.56 * | 0  | 0  | 0  | 0   |        |  |
| 12963579  | Slc30a7   | zinc transporter 7                                             | 2  | 0  | 2  | 4   | -0.21  | 0  | 2  | 1  | 3   | 0.14   |  |
| 31559926  | Zadh2     | zinc-binding alcohol dehydrogenase domain-containing protein 2 | 1  | 0  | 1  | 2   | -0.21  | 0  | 0  | 0  | 0   |        |  |
| 21326440  | Zwint     | ZW10 interactor                                                | 0  | 0  | 0  | 0   |        | 0  | 0  | 1  | 1   | 0.43   |  |
| 124053451 | Zzz3      | ZZ-type zinc finger-containing protein 3                       | 0  | 8  | 4  | 12  | 0.30 * | 0  | 0  | 0  | 0   |        |  |

## Suppl. Tab. 7

Quantification results are given as average log<sub>2</sub>(dDAVP/control) for all changes statistically significantly different (P <0.05) AND outside of the 95% confidence interval defined by the background distribution (Fig. 2A). Protein category may be redundant and was performed combining Gene Ontology term, Swissprot protein annotation and Panther protein class

| Protein category in Fig. 3                           | GI Accession No. | Gene Symbol | Protein Name                                             | average log <sub>2</sub> (dDAVP/control) |                |
|------------------------------------------------------|------------------|-------------|----------------------------------------------------------|------------------------------------------|----------------|
|                                                      |                  |             |                                                          | Nuclear extract                          | Nuclear pellet |
| Cytoskeleton                                         | 160837788        | Arpc1b      | actin-related protein 2/3 complex subunit 1B             |                                          | 0.47           |
| Cytoskeleton                                         | 112363072        | Arpc2       | actin-related protein 2/3 complex subunit 2              |                                          | 0.54           |
| Cytoskeleton                                         | 224809382        | Arpc5       | actin-related protein 2/3 complex subunit 5              |                                          | 0.46           |
| Cytoskeleton                                         | 21312654         | Arpc5l      | actin-related protein 2/3 complex subunit 5-like protein |                                          | 0.49           |
| Cytoskeleton                                         | 23956222         | Actr3       | actin-related protein 3                                  |                                          | 0.54           |
| Cell junction, Cytoskeleton                          | 145587092        | Mllt4       | afadin                                                   | 0.67                                     |                |
| Calcium signaling                                    | 61743961         | Ahnak       | AHNAK nucleoprotein isoform 1                            |                                          | 0.64           |
| Calcium signaling, Cell junction                     | 145864475        | Anxa9       | annexin A9                                               | 0.70                                     | 0.80           |
| Cell junction, WNT signaling                         | 6753294          | Ctnna1      | catenin alpha-1                                          |                                          | 0.57           |
| Cell junction, Transcription cofactor, WNT signaling | 6671684          | Ctnnb1      | catenin beta-1                                           |                                          | 0.65           |
| Cell cycle/ Mitosis, Vesicle trafficking             | 189458891        | Cenpf       | centromere protein F                                     | 0.61                                     |                |
| Chromatin modification, Regulation of apoptosis      | 119392064        | Chd8        | chromodomain-helicase-DNA-binding protein 8              | 0.62                                     |                |
| Vesicle trafficking                                  | 51491845         | Cltc        | clathrin heavy chain 1                                   | 0.64                                     |                |
| Chromatin modification, Transcription cofactor       | 70995311         | Crebbp      | CREB-binding protein                                     | 0.62                                     |                |
| Calcium signaling, Cell junction                     | 309263796        | Dsg2        | desmoglein-2-like                                        |                                          | 0.87           |
| Cell junction                                        | 190194418        | Dsp         | desmoplakin                                              |                                          | 0.61           |
| Genomic maintenance                                  | 9055282          | Mre11a      | double-strand break repair protein MRE11A                | 0.61                                     |                |
| Posttranslational modification                       | 56699423         | Nedd4       | E3 ubiquitin-protein ligase NEDD4                        | -0.76                                    |                |
| Cell junction                                        | 111185907        | Evpl        | envoplakin                                               | 0.87                                     |                |
| Transcription factor                                 | 253683411        | Elf3        | ETS-related transcription factor Elf-3 isoform 1         | 1.19                                     |                |
| RNA processing                                       | 167234372        | Eif4b       | eukaryotic translation initiation factor 4B              | -0.87                                    |                |
| Calcium signaling                                    | 67782360         | Esyt2       | extended synaptotagmin-2                                 | -0.72                                    |                |
| Transcription factor                                 | 31542626         | Hmbox1      | homeobox-containing protein 1                            | -0.71                                    |                |
| Chromatin modification                               | 139948756        | Ing3        | inhibitor of growth protein 3                            | 0.68                                     |                |
| Cell junction, Cytoskeleton                          | 28395018         | Jup         | junction plakoglobin                                     |                                          | 0.70           |
| Cytoskeleton                                         | 7106335          | Krt17       | keratin, type I cytoskeletal 17                          |                                          | 0.49           |
| Cytoskeleton                                         | 254540068        | Krt18       | keratin, type I cytoskeletal 18                          |                                          | 0.75           |
| Cytoskeleton                                         | 21592285         | Krt20       | keratin, type I cytoskeletal 20                          | 0.72                                     |                |
| Cytoskeleton                                         | 114145561        | Krt8        | keratin, type II cytoskeletal 8                          | 0.71                                     | 0.64           |
| Others                                               | 22095015         | Lass2       | LAG1 longevity assurance homolog 2                       |                                          | -0.52          |
| Cytoskeleton                                         | 158518433        | Lima1       | LIM domain and actin-binding protein 1 isoform b         |                                          | 0.60           |

|                                             |           |          |                                                                 |       |       |
|---------------------------------------------|-----------|----------|-----------------------------------------------------------------|-------|-------|
| Mediator complex                            | 121582430 | Med1     | mediator of RNA polymerase II transcription subunit 1 isoform 1 | 0.61  |       |
| Mediator complex                            | 124286862 | Med13    | mediator of RNA polymerase II transcription subunit 13          | 0.63  |       |
| Mediator complex                            | 157266302 | Med7     | mediator of RNA polymerase II transcription subunit 7           | 0.64  |       |
| Others                                      | 70608131  | Immt     | mitochondrial inner membrane protein                            |       | 0.51  |
| Cell cycle/ Mitosis                         | 40254521  | Mobkl3   | mps one binder kinase activator-like 3                          | 0.91  |       |
| Others                                      | 148271073 | Myadm    | myeloid-associated differentiation marker                       |       | 0.64  |
| Others                                      | 21312244  | Pdzd11   | PDZ domain-containing protein 11                                | 0.66  |       |
| Cell junction                               | 112421039 | Ppl      | periplakin                                                      | 0.76  |       |
| Others                                      | 124286797 | Plet1    | placenta-expressed transcript 1 protein precursor               |       | 0.59  |
| Cell junction                               | 21312960  | Pkp2     | plakophilin-2                                                   |       | 0.99  |
| Cytoskeleton                                | 254675251 | Plec     | plectin isoform 1d                                              |       | 0.63  |
| Others                                      | 153791304 | Prr12    | proline rich 12                                                 | 0.57  |       |
| WNT signaling                               | 254587904 | S100a14  | protein S100-A14 isoform a                                      |       | 0.51  |
| Nuclear transport                           | 226062635 | Rangap1  | ran GTPase-activating protein 1                                 | 0.68  | 0.54  |
| Cyclic AMP signaling                        | 21704066  | Rap1a    | ras-related protein Rap-1A precursor                            | -0.67 | -0.53 |
| Cyclic AMP signaling                        | 33859753  | Rap1b    | ras-related protein Rap-1b precursor                            | -0.83 |       |
| Others                                      | 225543465 | Gprc5a   | retinoic acid-induced protein 3                                 | 0.60  | 0.62  |
| RNA processing                              | 27753952  | Rbm7     | RNA-binding protein 7                                           | 0.72  |       |
| Others                                      | 119508422 | Setd1a   | SET domain containing 1A                                        | 0.61  |       |
| Others                                      | 309264544 | Srp14    | signal recognition particle 14 kDa protein-like                 | -0.65 |       |
| Others                                      | 30519943  | Samm50   | sorting and assembly machinery component 50 homolog             |       | 0.53  |
| Cytoskeleton                                | 55926127  | Spnb3    | spectrin beta chain, brain 2                                    |       | 0.68  |
| Cell junction, Transcription cofactor       | 254675279 | Tjp1     | tight junction protein ZO-1 isoform 2                           |       | 0.91  |
| Cell junction                               | 160333863 | Tjp2     | tight junction protein ZO-2 isoform 2                           | 0.77  |       |
| Cell junction                               | 114052811 | Tjp3     | tight junction protein ZO-3                                     |       | 0.58  |
| Transcription factor                        | 6680512   | Junb     | transcription factor jun-B                                      | 1.86  |       |
| Transcription factor                        | 21314854  | Gatad2b  | transcriptional repressor p66-beta                              |       | 0.46  |
| Others                                      | 145966911 | Tmed9    | transmembrane emp24 domain-containing protein 9 precursor       | -0.59 |       |
| Regulation of apoptosis                     | 13386014  | Tmem85   | transmembrane protein 85                                        |       | -0.59 |
| Regulation of apoptosis                     | 28077007  | Uaca     | uveal autoantigen with coiled-coil domains and ankyrin repeats  | 0.73  |       |
| Others                                      | 31981304  | Atp6v0d1 | V-type proton ATPase subunit d 1                                |       | 0.56  |
| Transcription cofactor, Genomic maintenance | 145587104 | Xrcc6    | X-ray repair cross-complementing protein 6                      | -0.66 |       |
| Chromatin modification                      | 225543568 | Yeats2   | YEATS domain-containing protein 2 isoform 2                     | 0.64  |       |
| Transcription cofactor                      | 115270986 | Zc3h11a  | zinc finger CCCH domain-containing protein 11A                  | 0.61  |       |

## Suppl. Tab. 8

List of cytoskeleton and cell junction proteins changed after 30 or 60 minutes of dDAVP stimulation compared to control

| GI Accession No. | Gene Symbol | Nuclear Fraction | log <sub>2</sub> (dDAVP/vehicle), 30min | log <sub>2</sub> (dDAVP/vehicle), 60min |
|------------------|-------------|------------------|-----------------------------------------|-----------------------------------------|
| 224809382        | Arpc5       | NP               | 0.64                                    | 0.46                                    |
| 160837788        | Arpc1b      | NP               | 1.03                                    | 0.47                                    |
| 21312654         | Arpc5l      | NP               | 0.042                                   | 0.49                                    |
| 112363072        | Arpc2       | NP               | 0.12                                    | 0.54                                    |
| 329664973        | Actr3       | NP               | 0.0069                                  | 0.54                                    |
| 6753294          | Ctnna1      | NP               | 0.2                                     | 0.57                                    |
| 114052811        | Tjp3        | NP               | 0.13                                    | 0.58                                    |
| 190194418        | Dsp         | NP               | -0.28                                   | 0.61                                    |
| 114145561        | Krt8        | NP               | 0.01                                    | 0.64                                    |
| 145587092        | Mllt4       | NE               | 0.17                                    | 0.67                                    |
| 55926127         | Spnb3       | NP               | 0.046                                   | 0.68                                    |
| 28395018         | Jup         | NP               | 0.15                                    | 0.7                                     |
| 114145561        | Krt8        | NE               | 0.014                                   | 0.71                                    |
| 21592285         | Krt20       | NE               | 0.09                                    | 0.72                                    |
| 254540068        | Krt18       | NP               | 0.033                                   | 0.75                                    |
| 112421039        | Ppl         | NE               | -0.025                                  | 0.76                                    |
| 312222765        | Tjp2        | NE               | 0.38                                    | 0.77                                    |
| 111185907        | Evpl        | NE               | 0.00068                                 | 0.87                                    |
| 254675277        | Tjp1        | NP               | 0.059                                   | 0.91                                    |
| 21312960         | Pkp2        | NP               | 0.0024                                  | 0.99                                    |
